# Supplementary material for: Within and between Whorls: Comparative Transcriptional Profiling of Aquilegia and Arabidopsis
Source: PLoS One. 2010 Mar 23;5(3):e9735. doi: 10.1371/journal.pone.0009735 (PMC2843724; doi:10.1371/journal.pone.0009735)
Supplement: Table S2 — Differentially expressed genes in late pre-anthesis A. formosa floral whorls. (5.15 MB XLS) [file pone.0009735.s003.xls]

## Sheet: SEP
Genes down-regulated in SEPals (all: 34, highest absolute D stat: 22)																					Genes up-regulated in SEPals (all: 118, highest absolute D stat: 61)
SEQ_ID	Annotation	GO	db.match.accession	db.match.header	E.value	P.value	STA	CAR	PET	SEP	STD	STA+STD+CAR	PET+STA	SEP+PET	STA+CAR	SEP+PET+STA	PET+STA+STD	STA+STD	d stat test		SEQ_ID	Annotation	GO	db.match.accession	db.match.header	E.value	P.value	STA	CAR	PET	SEP	STD	STA+STD+CAR	PET+STA	SEP+PET	STA+CAR	SEP+PET+STA	PET+STA+STD	STA+STD	d stat test
TC9805	similar to UP|Q76MS5_LYCES (Q76MS5) LEXYL1 protein, partial (43%)	GO:0005975;GO:0004553;GO:0008372	At5g64570.1	68418.m08115 glycosyl hydrolase family 3 protein	1e-130	1e-130	1.84522	5.0919	5.40706	-28.7494	1.211	7.13016	6.13951	-6.79391	5.94309	-5.07923	7.44935	2.52855	28.7494		TC18723	weakly similar to PRF|NP_199780.1|15240534|NP_199780 UDP-glucoronosyl/UDP-glucosyl transferase family protein {Arabidopsis thaliana}, partial (47%)	NA	At5g65550.1	68418.m08248 UDP-glucoronosyl/UDP-glucosyl transferase family protein contains Pfam profile: PF00201 UDP-glucoronosyl and UDP-glucosyl transferase ;similar to flavonol 3-O-glucosyltransferase (anthocyanin rh-TRUNCATED-	1.1e-103	1.1e-103	-1.47378	-3.43	-4.56316	17.8852	-3.05527	-6.23051	-5.6219	7.23451	-2.90942	4.70592	-7.71758	-3.66553	17.8852
TC8262	similar to UP|Q9LU14_ARATH (Q9LU14) Proline-rich protein APG-like; GDSL-motif lipase/hydrolase-like protein (AT3g16370/MYA6_18), partial (93%)	GO:0016789;GO:0016298;GO:0008372	At3g16370.1	68416.m02071 GDSL-motif lipase/hydrolase family protein similar to family II lipases EXL3 GI:15054386, EXL1 GI:15054382, EXL2 GI:15054384 from [Arabidopsis thaliana]; contains Pfam profile: PF00657 Lipase Ac-TRUNCATED-	3e-124	3e-124	0.507769	1.68303	5.9623	-19.3633	4.65855	6.24123	5.04798	-5.68603	1.83338	-2.53764	10.3927	3.98083	19.3633		TC17779	weakly similar to UP|Q9M6E7_TOBAC (Q9M6E7) UDP-glucose:salicylic acid glucosyltransferase, partial (67%)	GO:0016757;GO:0016758;GO:0008194;GO:0008372	At2g43820.1	68415.m05447 UDP-glucoronosyl/UDP-glucosyl transferase family protein contains Pfam profile: PF00201 UDP-glucoronosyl and UDP-glucosyl transferase	3.3e-132	3.3e-132	-2.51957	-2.65354	-4.42839	17.292	-0.849433	-4.9472	-6.50374	3.91236	-4.28006	3.15756	-4.92626	-2.54759	17.292
TC9694	weakly similar to PRF|NP_187456.1|15231911|NP_187456 serine carboxypeptidase S10 family protein {Arabidopsis thaliana}, partial (42%)	NA	At3g07990.1	68416.m00976 serine carboxypeptidase S10 family protein similar to serine carboxypeptidase II (CP-MII) GB:CAA70815 [Hordeum vulgare]	6.4e-106	6.4e-106	3.11471	1.42445	7.89941	-19.1191	-1.16077	2.11607	10.1966	-3.61367	4.45386	-0.814116	7.32821	1.23609	19.1191		TC10471	weakly similar to UP|Q7PC71_ORYSA (Q7PC71) Cellulose synthase-like H2, partial (17%)	NA	At2g32540.1	68415.m03975 cellulose synthase family protein similar to cellulose synthase catalytic subunit from Arabidopsis thaliana [gi:5230423], cellulose synthase-5 from Zea mays [gi:9622882]	2.7e-66	2.7e-66	-1.56738	-4.70789	-0.142699	16.7755	-3.7055	-7.55506	-1.36529	11.0624	-4.49324	6.81912	-4.07019	-3.38002	16.7755
TC14915	weakly similar to PRF|NP_195348.2|42567452|NP_195348 aldehyde dehydrogenase family protein {Arabidopsis thaliana}, partial (78%)	GO:0004028	At4g36250.1	68417.m05156 aldehyde dehydrogenase family protein contais aldehyde dehydrogenase (NADP) family protein domain, Pfam:PF00171	7.8e-156	7.8e-156	-0.0434873	2.75369	3.01443	-19.1047	3.23459	5.64375	2.00114	-7.28444	2.45128	-3.76601	2.94604	2.79284	19.1047		TC17180	similar to UP|Q9FGC3_ARATH (Q9FGC3) Serine/threonine protein kinase-like, partial (67%)	GO:0007281;GO:0009314;GO:0019221;GO:0009897;GO:0046777;GO:0005737;GO:0005020;GO:0008283;GO:0006935;GO:0030154;GO:0016021;GO:0048066;GO:0016301;GO:0030097;GO:0004713;GO:0005515;GO:0005524;GO:0007243;GO:0018108;GO:0005634	At5g18910.1	68418.m02246 protein kinase family protein contains protein kinase domain, Pfam:PF00069	2.7e-137	2.7e-137	-2.44284	-4.35152	-3.96505	16.4277	1.23524	-6.12686	-8.64944	4.80283	-7.12987	1.16035	-4.63595	-2.67107	16.4277
TC8600	similar to PRF|NP_195996.1|15237519|NP_195996 glycosyl transferase family 2 protein {Arabidopsis thaliana}, partial (92%)	GO:0016757;GO:0000004;GO:0046527;GO:0008372	At5g03760.1	68418.m00339 glycosyl transferase family 2 protein similar to beta-(1-3)-glucosyl transferase GB:AAC62210 GI:3687658 from [Bradyrhizobium japonicum], cellulose synthase from Agrobacterium tumeficiens [gi:710-TRUNCATED-	1.8e-236	1.8e-236	0.799854	3.64042	2.09348	-17.7299	4.65368	7.82091	1.75133	-11.4736	2.2817	-9.55491	8.47278	6.45432	17.7299		TC12944	similar to UP|PPDK_MESCR (Q42910) Pyruvate, phosphate dikinase, chloroplast precursor (Pyruvate, orthophosphate dikinase) , partial (39%)	NA	At4g15530.1	68417.m02372 pyruvate phosphate dikinase family protein contains Pfam profiles: PF01326 pyruvate phosphate dikinase, PEP/pyruvate binding domain, PF02896 PEP-utilizing enzyme, TIM barrel domain	1.5e-159	1.5e-159	-6.4991	-3.49363	1.06915	16.2816	-1.37856	-7.74544	-4.91925	11.4301	-11.5524	4.37296	-6.16094	-7.64975	16.2816
TC17118	similar to UP|C86A2_ARATH (O23066) Cytochrome P450 86A2 , partial (45%)	NA	At1g01600.1	68414.m00077 cytochrome P450, putative similar to cytochrome P450 GI:10442763 from [Triticum aestivum]	8.9e-116	8.9e-116	0.886826	3.75878	1.22377	-16.4411	3.58572	8.89598	1.76933	-6.66588	3.33651	-6.44496	5.76105	4.28454	16.4411		TC14157	weakly similar to UP|Q9M563_VITVI (Q9M563) Beta-1,3-glucanase, partial (88%)	GO:0008810;GO:0004553;GO:0009627	At3g57270.1	68416.m06375 glycosyl hydrolase family 17 protein similar to beta-1,3-glucanase GI:16903144 from [Prunus persica]	1.1e-94	1.1e-94	-2.75326	-9.54315	-2.15879	16.0676	0.927369	-7.99965	-3.56045	7.64911	-8.62797	4.2634	-2.72135	-0.752849	16.0676
TC11801	similar to PRF|NP_567769.1|18416951|NP_567769 zinc finger (C2H2 type) family protein {Arabidopsis thaliana}, partial (65%)	GO:0003676;GO:0008270;GO:0045449;GO:0003700	At5g54630.1	68418.m06802 zinc finger protein-related contains Prosite:PS00028 Zinc finger, C2H2 type, domain	7.1e-139	7.1e-139	-1.6699	3.99904	3.36251	-16.0538	4.05684	4.00559	1.8397	-4.93893	1.48342	-6.70261	4.22402	1.79861	16.0538		TC13579	weakly similar to UP|Q6L8G3_ORYSA (Q6L8G3) Ferric reductase, partial (16%)	NA	At5g49730.1	68418.m06158 ferric reductase-like transmembrane component family protein similar to ferric-chelate reductase (FRO1) [Pisum sativum] GI:15341529; contains Pfam profile PF01794: Ferric reductase like transmem-TRUNCATED-	1.2e-74	1.2e-74	0.738716	-12.0057	-1.70059	15.9908	-0.181892	-7.16882	-0.803434	8.09459	-7.18005	8.7714	-1.04989	0.467633	15.9908
TC9074	similar to UP|Q56WY6_ARATH (Q56WY6) Serine protease like protein, partial (87%)	NA	At2g05920.1	68415.m00642 subtilase family protein contains similarity to cucumisin-like serine protease GI:3176874 from [Arabidopsis thaliana]	1.3e-155	1.3e-155	-1.39848	6.41652	5.76898	-15.9809	-0.0847746	3.04592	3.88531	-3.8586	3.20149	-4.77189	4.22265	-0.519011	15.9809		TC11985	similar to UP|MTDH_FRAAN (Q9ZRF1) Probable mannitol dehydrogenase (NAD-dependent mannitol dehydrogenase) , partial (97%)	GO:0045551;GO:0019592;GO:0009809;GO:0009626;GO:0046029;GO:0008372	At4g39330.1	68417.m05568 mannitol dehydrogenase, putative nearly identical to SP|P42734, probable mannitol dehydrogenase	2.1e-139	2.1e-139	-4.63461	-3.34737	0.57014	15.4184	-3.07982	-11.7129	-2.8661	11.557	-7.45428	4.7669	-2.75635	-3.51336	15.4184
TC16002	similar to UP|Q94KD2_ARATH (Q94KD2) AT5g51950/MSG15_3, partial (73%)	GO:0046202;GO:0016832;GO:0006952;GO:0046593;GO:0008372	At1g12570.1	68414.m01459 glucose-methanol-choline (GMC) oxidoreductase family protein similar to mandelonitrile lyase from Prunus serotina [SP|P52706, SP|P52707]; contains Pfam profile PF00732 GMC oxidoreductase -TRUNCATED-	5.6e-189	5.6e-189	8.33945	4.10492	-1.10586	-15.7845	-1.07005	11.7346	3.33758	-13.8039	14.1202	-1.79041	5.0052	2.99514	15.7845		DT759535	weakly similar to UP|Q53VE0_LOTJA (Q53VE0) Ser/Thr protein kinase (Fragment), partial (31%)	NA	At4g18250.1	68417.m02710 receptor serine/threonine kinase, putative similar to to receptor serine/threonine kinase PR5K gi|1235680|gb|AAC49208	1.9e-81	1.9e-81	-2.50353	-4.06998	1.14124	14.8991	-2.49426	-9.77345	-1.49188	11.3169	-6.89892	5.56982	-4.03032	-3.75815	14.8991
TC14501	weakly similar to UP|Q9C5Q6_ARATH (Q9C5Q6) Fasciclin-like arabinogalactan-protein 2, partial (77%)	GO:0031225;GO:0005554	At4g12730.1	68417.m01999 fasciclin-like arabinogalactan-protein (FLA2) identical to gi_13377778_gb_AAK20858	1.4e-119	1.4e-119	2.82628	3.5234	-0.866994	-15.2646	5.86278	7.6194	1.55284	-13.3844	5.80632	-8.91187	4.92597	6.05352	15.2646		TC18438	weakly similar to UP|Q7XJ54_ARATH (Q7XJ54) At3g59320, partial (15%)	NA	At3g59310.1	68416.m06611 expressed protein identical to anthocyanin-related membrane protein 1 [Arabidopsis thaliana] GI:16416383; supporting cDNA gi|16416382|dbj|AB060644.1|	4.2e-14	4.2e-14	-2.67193	-3.83282	1.6222	14.4601	-2.16764	-9.27942	-2.38389	12.4057	-9.21369	5.98117	-2.6402	-4.89067	14.4601
TC8401	NA	NA	At2g20870.1	68415.m02459 cell wall protein precursor, putative identical to Putative cell wall protein precursor (Swiss-Prot:P47925) [Arabidopsis thaliana]; weak similarity to mu-protocadherin (GI:7861967) [Rattus norve-TRUNCATED-	0.059	0.057	1.5053	5.27154	2.58405	-13.3912	-0.871135	4.10424	2.71351	-5.19104	5.78846	-2.90634	2.48932	0.453346	13.3912		TC11454	weakly similar to UP|Q68NI4_CAMSI (Q68NI4) Polyphenol oxidase, partial (36%)	NA	At3g05370.1	68416.m00586 disease resistance family protein contains leucine rich-repeat domains Pfam:PF00560, INTERPRO:IPR001611; similar to Cf-2 disease resistance protein GB:AAC15780 from [Lycopersicon pimpinellifoliu-TRUNCATED-	5	0.993	-4.09393	-8.17737	-4.16103	14.4394	6.01977	-4.28413	-6.52058	4.78747	-10.8458	1.59239	-1.52021	1.29882	14.4394
TC9233	similar to PRF|NP_193738.1|15235269|NP_193738 expressed protein {Arabidopsis thaliana}, partial (77%)	GO:0009556;GO:0004650	At4g20050.1	68417.m02934 expressed protein C65DMY30S	1.1e-151	1.1e-151	0.473006	0.806659	5.97286	-12.9969	1.89025	3.33286	4.18902	-2.78488	0.922277	-2.85164	7.99077	1.72768	12.9969		TC15178	similar to PRF|NP_568085.2|30679163|NP_568085 UDP-sulfoquinovose:DAG sulfoquinovosyltransferase / sulfolipid synthase (SQD2) {Arabidopsis thaliana}, partial (80%)	GO:0009507;GO:0016757;GO:0046510;GO:0016036;GO:0046506	At5g01220.1	68418.m00027 UDP-sulfoquinovose:DAG sulfoquinovosyltransferase / sulfolipid synthase (SQD2) identical to GI:20302857	1.4e-195	1.4e-195	-4.29799	-4.03226	4.12704	13.8762	-4.95003	-11.1389	-0.412481	7.22074	-7.79299	7.1709	-2.55691	-4.39592	13.8762
TC12191	similar to UP|Q9FLG1_ARATH (Q9FLG1) Beta-xylosidase, partial (43%)	NA	At5g64570.1	68418.m08115 glycosyl hydrolase family 3 protein	1.1e-158	1.1e-158	2.71015	3.66751	4.66126	-12.865	0.336393	5.56109	5.64105	-5.22668	4.97944	-3.02891	5.14998	2.06179	12.865		TC16801	similar to UP|Q93YG1_MESCR (Q93YG1) Monodehydroascorbate reductase, partial (90%)	GO:0006118	At3g52880.1	68416.m05827 monodehydroascorbate reductase, putative monodehydroascorbate reductase (NADH), Lycoperison esculentum, PIR:T06407	2.7e-178	2.7e-178	-3.62871	-3.59433	1.60936	13.7379	-0.848174	-11.6345	-1.90199	9.43446	-8.34335	6.2851	-3.15713	-3.66469	13.7379
TC10076	similar to PIR|T50764|T50764 adhesion of calyx edges protein ACE [imported] {Arabidopsis thaliana}, partial (78%)	GO:0016832;GO:0008372	At1g72970.1	68414.m08439 glucose-methanol-choline (GMC) oxidoreductase family protein similar to mandelonitrile lyase from Prunus serotina [SP|P52706, SP|P52707]; contains Pfam profile PF00732 GMC oxidoreductase -TRUNCATED-	5.1e-200	5.1e-200	-1.90029	10.3831	0.0202681	-12.77	2.28046	9.61308	-1.68299	-9.91938	6.0469	-8.39813	0.786765	0.972574	12.77		TC13098	similar to PRF|NP_194867.2|22329052|NP_194867 ABC1 family protein {Arabidopsis thaliana}, partial (34%)	NA	At4g31390.1	68417.m04452 ABC1 family protein contains Pfam domain, PF03109: ABC1 family	3.3e-109	3.3e-109	-3.20858	-4.06427	1.80517	13.5428	-4.31615	-9.49322	-0.525958	10.6742	-4.16579	6.69936	-4.62173	-5.72879	13.5428
TC9075	similar to UP|P93204_LYCES (P93204) SBT1 protein (Subtilisin-like protease) , partial (46%)	GO:0004289;GO:0006508	At2g05920.1	68415.m00642 subtilase family protein contains similarity to cucumisin-like serine protease GI:3176874 from [Arabidopsis thaliana]	8.3e-184	8.3e-184	-1.58859	5.58508	6.6356	-12.6743	-0.216544	2.47576	4.79655	-1.95089	2.54291	-3.03797	4.71497	-1.3256	12.6743		TC9104	similar to UP|Q84TF0_ARATH (Q84TF0) At2g37790, partial (98%)	GO:0004033	At2g37790.1	68415.m04640 aldo/keto reductase family protein similar to chalcone reductase [Sesbania rostrata][GI:2792155], and aldose reductase ALDRXV4 [Xerophyta viscosa][GI:4539944], [Hordeum vulgare][GI:728592] -TRUNCATED-	4.1e-127	4.1e-127	-6.36633	-1.92648	0.769569	13.4005	-4.75287	-7.85652	-2.7267	11.7448	-6.79726	4.46404	-7.83911	-9.20895	13.4005
TC12645	similar to UP|Q67Z18_ARATH (Q67Z18) MRNA, partial cds, clone: RAFL23-25-J01 (MRNA, partial cds, clone: RAFL23-09-L14) (Fragment), partial (59%)	NA	At2g01910.1	68415.m00125 microtubule associated protein (MAP65/ASE1) family protein low similarity to protein regulating cytokinesis 1 (PRC1) [Homo sapiens] GI:2865521; contains Pfam profile PF03999: Microtubule associa-TRUNCATED-	3.5e-105	3.5e-105	-1.2913	6.91663	1.75769	-12.5452	2.83956	4.81328	-1.03691	-6.7268	3.22399	-9.65456	1.07646	0.0961699	12.5452		DR943211	weakly similar to PRF|NP_850033.1|30681870|NP_850033 serine carboxypeptidase S10 family protein {Arabidopsis thaliana}, partial (38%)	NA	At1g33540.1	68414.m04150 serine carboxypeptidase S10 family protein similar to GI:8777303 from [Arabidopsis thaliana] (DNA Res. 7 (1), 31-63 (2000))	5.2e-65	5.2e-65	-0.78376	-7.37059	-2.00851	13.3449	0.307321	-5.45748	-2.33471	5.52859	-6.26445	5.42527	-1.91158	-0.284215	13.3449
TC16991	homologue to PRF|NP_194887.1|15236004|NP_194887 glycosyl transferase family 2 protein {Arabidopsis thaliana}, partial (51%)	GO:0016757;GO:0000004;GO:0008372	At4g31590.1	68417.m04487 glycosyl transferase family 2 protein similar to cellulose synthase from Agrobacterium tumeficiens [gi:710492] and Agrobacterium radiobacter [gi:710493]; contains Pfam glycosyl transferase, grou-TRUNCATED-	1.7e-183	1.7e-183	4.54304	-4.01546	7.80857	-12.461	0.461206	1.96048	7.84851	-1.79607	1.01183	1.94302	12.2696	3.22993	12.461		TC15220	similar to UP|Q68BJ8_MALDO (Q68BJ8) Sorbitol transporter, partial (89%)	GO:0005886;GO:0005403;GO:0005351;GO:0015144;GO:0015145;GO:0015591;GO:0015575;GO:0005354;GO:0005355;GO:0015148;GO:0005365;GO:0015168;GO:0016020	At3g18830.1	68416.m02391 mannitol transporter, putative similar to mannitol transporter [Apium graveolens var. dulce] GI:12004316; contains Pfam profile PF00083: major facilitator superfamily protein	1.2e-175	1.2e-175	1.61589	-1.69194	-7.5353	13.3343	-4.52261	-3.33216	-3.46114	2.85628	0.0789349	2.90351	-8.03637	-1.90895	13.3343
TC11959	weakly similar to PRF|NP_198880.2|30693640|NP_198880 expressed protein {Arabidopsis thaliana}, partial (8%)	NA	At5g40640.1	68418.m04933 expressed protein	1.6e-63	1.6e-63	3.14407	6.2215	-0.395632	-11.6447	0.298571	7.32429	1.56093	-6.59384	7.76195	-4.07503	1.7571	2.53191	11.6447		TC13963	similar to PRF|NP_194433.1|15236949|NP_194433 expressed protein {Arabidopsis thaliana}, partial (70%)	GO:0005554	At4g27030.1	68417.m03887 expressed protein	1.3e-103	1.3e-103	-0.170559	-10.4264	2.92954	13.2906	-4.61563	-13.0575	1.6108	10.4281	-7.96473	11.4908	-1.18581	-3.56624	13.2906
TC9148	similar to UP|Q40724_ORYSA (Q40724) Transcriptional activator protein, partial (36%)	NA	At5g24800.1	68418.m02928 bZIP transcription factor family protein contains Pfam profile: PF00170 bZIP transcription factor; identical to cDNA bZIP protein BZO2H2 GI:10954096	5.9e-50	5.9e-50	2.70595	2.29245	3.74011	-11.3231	0.390831	1.87784	6.09058	-4.30606	4.91466	-2.00936	4.74735	2.85723	11.3231		TC8034	similar to UP|Q5I6D6_9ROSI (Q5I6D6) Sinapyl alcohol dehydrogenase-like protein, complete	GO:0045551;GO:0019592;GO:0009809;GO:0009626;GO:0046029;GO:0008372	At4g37990.1	68417.m05368 mannitol dehydrogenase, putative (ELI3-2) identical to GI:16269	4.2e-141	4.2e-141	-3.72163	-1.18359	-0.810229	13.181	-2.41235	-5.10327	-4.32629	6.30503	-4.79949	2.51357	-4.93426	-5.47267	13.181
TC15519	weakly similar to UP|C77A3_SOYBN (O48928) Cytochrome P450 77A3 , partial (93%)	GO:0019825;GO:0005739	At5g04660.1	68418.m00474 cytochrome P450, putative cytochrome P450 77A3p, Glycine max., PIR:T05948	3.3e-180	3.3e-180	3.81104	1.30117	0.491944	-11.1245	2.44373	4.65556	1.66434	-6.8083	4.69748	-2.26619	4.18484	3.74034	11.1245		TC17613	similar to PRF|NP_563935.1|18394056|NP_563935 expressed protein {Arabidopsis thaliana}, partial (61%)	GO:0005554	At1g13990.1	68414.m01650 expressed protein	1.9e-72	1.9e-72	-2.77149	-10.8886	1.08164	12.9891	0.857412	-9.30135	-1.47224	10.4457	-9.53766	7.04728	-0.790779	-1.79851	12.9891
TC10968	similar to UP|Q6NLC2_ARATH (Q6NLC2) At3g53760, partial (45%)	NA	At3g53760.1	68416.m05939 tubulin family protein similar to SP|Q9SC88 Gamma-tubulin complex component 4 homolog {Medicago truncatula}, SP|Q9UGJ1|GCP4_HUMAN Gamma-tubulin complex component 4 {Homo sapiens}; contains Pfam -TRUNCATED-	2.7e-162	2.7e-162	5.8682	5.02005	-1.5615	-11.1181	-0.587933	8.47372	2.59589	-8.4236	8.57288	-3.73048	1.52882	3.14607	11.1181		TC10270	weakly similar to UP|Q948K9_CUCME (Q948K9) CmE8 protein, partial (81%)	GO:0009692;GO:0016706	At1g06650.2	68414.m00705 2-oxoglutarate-dependent dioxygenase, putative similar to 2A6 (GI:599622) and tomato ethylene synthesis regulatory protein E8 (SP|P10967); contains Pfam profile: PF00671 Iron/Ascorbate oxidoredu-TRUNCATED-	2.4e-113	2.4e-113	-3.62319	-7.50674	0.690216	12.7488	-0.397207	-9.86954	-2.19688	9.61857	-6.60497	5.23247	-2.5245	-3.12849	12.7488
DR938535	similar to UP|Q8S9L1_ARATH (Q8S9L1) AT4g00360/A_IG005I10_21, partial (17%)	NA	At4g00360.1	68417.m00050 cytochrome P450, putative	6.5e-49	6.5e-49	0.287885	2.55918	2.0144	-10.7732	4.21773	5.88358	1.3077	-6.32073	2.22292	-5.52215	5.1002	3.55501	10.7732		TC11630	similar to UP|Q52QR2_SOYBN (Q52QR2) NAC domain protein NAC4, partial (66%)	GO:0009825;GO:0007275;GO:0009908;GO:0009867;GO:0003700;GO:0008372	At4g27410.2	68417.m03938 no apical meristem (NAM) family protein (RD26) contains Pfam PF02365: No apical meristem (NAM) domain; Arabidopsis thaliana nap gene,PID:e1234813; identical to cDNA RD26 mRNA for NAM-like protei-TRUNCATED-	1.2e-94	1.2e-94	-5.57958	-6.2682	-1.1152	12.7192	3.39324	-5.38466	-5.12553	7.12728	-8.61237	2.14764	-1.40501	-1.26559	12.7192
TC15454	weakly similar to UP|Q84MB3_ARATH (Q84MB3) At1g06620, partial (35%)	NA	At1g04350.1	68414.m00425 2-oxoglutarate-dependent dioxygenase, putative Similar to Arabidopsis 2A6 (gb|X83096) and to tomato ethylene synthesis regulatory protein E8 (SP|P10967); EST gb|T76913 comes from this gene -TRUNCATED-	7.7e-78	7.7e-78	4.22338	3.13144	-4.37565	-18.637	7.64136	17.0374	0.794988	-21.9734	6.27431	-10.8742	7.16034	7.81767	0		TC17568	weakly similar to UP|DRL30_ARATH (Q9LZ25) Probable disease resistance protein At5g04720, partial (40%)	NA	At4g33300.1	68417.m04737 disease resistance protein (CC-NBS-LRR class), putative domain signature CC-NBS-LRR exists, suggestive of a disease resistance protein.	3.7e-142	3.7e-142	-5.56706	-7.52918	2.90457	12.4633	-0.134104	-12.1079	-1.73271	9.93173	-10.4767	5.37846	-1.56128	-3.37771	12.4633
TC10545	similar to UP|EXPB3_ARATH (Q9M0I2) Beta-expansin 3 precursor (AtEXPB3) (At-EXPB3) (Ath-ExpBeta-1.6), partial (84%)	GO:0009664;GO:0009826;GO:0009828;GO:0005554	At4g28250.1	68417.m04047 beta-expansin, putative (EXPB3) similar to soybean pollen allergen (cim1) protein - soybean, PIR2:S48032; beta-expansin gene family, PMID:11641069	7e-100	7e-100	3.82119	7.31917	-2.01689	-14.205	0.73242	10.7417	0.936032	-14.7287	11.6033	-7.53021	1.49658	3.96868	0		DT744182	weakly similar to UP|O22988_ARATH (O22988) Cellulose synthase isolog, partial (12%)	NA	At4g23990.1	68417.m03448 cellulose synthase family protein similar to cellulose synthase catalytic subunit from Arabidopsis thaliana [gi:5230423], cellulose synthase-5 from Zea mays [gi:9622882]	2.6e-48	2.6e-48	-4.6462	-3.38582	-1.38603	12.4148	1.15991	-3.8191	-5.88449	6.45475	-8.35408	1.66138	-4.23186	-2.41274	12.4148
TC8558	similar to UP|Q45X99_9ROSA (Q45X99) Beta-1,3-glucanase 2, partial (87%)	GO:0004553	At5g55180.1	68418.m06879 glycosyl hydrolase family 17 protein similar to elicitor inducible chitinase Nt-SubE76 GI:11071974 from [Nicotiana tabacum]	4e-168	4e-168	1.89414	3.49256	-3.54121	-13.3201	7.96035	16.9961	-0.786633	-15.298	3.96638	-10.8281	6.13678	8.80926	0		DT755352	weakly similar to UP|Q9FF29_ARATH (Q9FF29) Receptor serine/threonine kinase, partial (25%)	NA	At4g18250.1	68417.m02710 receptor serine/threonine kinase, putative similar to to receptor serine/threonine kinase PR5K gi|1235680|gb|AAC49208	6.7e-63	6.7e-63	-1.58027	-7.04536	1.69178	12.3412	-2.97433	-8.65699	0.0882977	5.84722	-5.67866	7.29228	-1.79699	-3.21197	12.3412
TC14808	similar to UP|Q6EQ17_ORYSA (Q6EQ17) Dehydration-responsive protein-like, partial (95%)	GO:0016023;GO:0045045;GO:0008168;GO:0005739;GO:0005554	At1g26850.1	68414.m03273 dehydration-responsive family protein similar to early-responsive to dehydration stress ERD3 protein [Arabidopsis thaliana] GI:15320410; contains Pfam profile PF03141: Putative methyltransferase-TRUNCATED-	6.6e-278	6.6e-278	9.38723	-2.05694	6.3854	-13.0787	0.62365	4.26271	13.2018	-5.76436	4.60449	1.00337	11.7196	7.39973	0		TC13823	homologue to UP|LOB_ARATH (Q9FML4) LATERAL ORGAN BOUNDARIES protein, partial (58%)	GO:0000004;GO:0008372;GO:0005554	At5g63090.1	68418.m07918 LOB domain protein / lateral organ boundaries protein (LOB) identical to LOBa [Arabidopsis thaliana] GI:17484100, SP|Q9FML4 LATERAL ORGAN BOUNDARIES protein {Arabidopsis thaliana}	1.8e-53	1.8e-53	-2.25631	-3.59612	-5.15211	12.336	3.74739	-3.01965	-6.56191	3.01261	-6.767	0.661735	-2.67367	0.574306	12.336
TC18987	weakly similar to UP|Q8VZG4_ARATH (Q8VZG4) At1g21590/F24J8_9, partial (25%)	NA	At1g77280.1	68414.m09000 protein kinase family protein contains Pfam domain, PF00069: Protein kinase domain	1.8e-92	1.8e-92	14.0244	3.30376	-3.36336	-12.8554	-0.473976	11.6274	5.60401	-13.0021	12.7821	-1.92513	4.07994	8.93927	0		TC18670	NA	GO:0009706	At1g32080.1	68414.m03947 membrane protein, putative contains 12 transmembrane domains; similar to yohK (GI:405873) [Escherichia coli]	2.5e-182	2.5e-182	-2.10195	-4.5409	3.59066	12.2087	-6.82738	-10.227	0.578642	9.27894	-3.40695	9.82057	-4.84554	-4.89604	12.2087
TC14483	weakly similar to UP|Q9SVA8_ARATH (Q9SVA8) Cytochrome P450-like protein, partial (44%)	NA	At4g32170.1	68417.m04575 cytochrome P450, putative cytochrome p450, Arabidopsis thaliana, PID:G2252844	1.8e-101	1.8e-101	3.12371	-6.83474	12.5308	-12.5604	2.19254	0.420606	18.5479	-0.407178	-1.15091	2.81207	25.9793	7.00807	0		TC18038	similar to UP|Q9SSX8_TOBAC (Q9SSX8) WIZZ, partial (37%)	NA	At1g80840.1	68414.m09484 WRKY family transcription factor similar to WRKY transcription factor GB:BAA87058 GI:6472585 from [Nicotiana tabacum]	1.3e-41	1.3e-41	-4.05109	-4.43145	-0.30667	12.1783	1.05287	-8.08466	-4.23823	6.60449	-9.52459	2.33546	-3.23698	-2.62503	12.1783
TC16208	similar to UP|Q9LZ74_ARATH (Q9LZ74) 3-phosphoinositide-dependent protein kinase-1 PDK1, partial (92%)	GO:0016301;GO:0008372	At5g04510.1	68418.m00451 3-phosphoinositide-dependent protein kinase, putative similar to 3-phosphoinositide-dependent protein kinase-1 [Oryza sativa] gi|5001830|gb|AAD37166	3.9e-202	3.9e-202	14.2075	-1.03529	-1.15874	-12.0214	0.596895	7.80044	5.64191	-9.73898	5.47269	0.285777	8.52674	9.1474	0		DR917801	similar to UP|Q48Q39_PSES (Q48Q39) Type III effector HopR1, partial (0%)	NA	At1g18380.1	68414.m02296 expressed protein	1.2e-07	1.2e-07	-3.56912	-3.07473	0.278368	11.9647	-1.41721	-6.36047	-1.7783	6.59698	-5.2594	4.25128	-3.13012	-3.5373	11.9647
TC11215	similar to UP|Q9LYR6_ARATH (Q9LYR6) Peptide transporter-like protein, partial (85%)	GO:0005215;GO:0006857;GO:0016020	At5g13400.1	68418.m01543 proton-dependent oligopeptide transport (POT) family protein contains Pfam profile: PF00854 POT family	2.9e-236	2.9e-236	2.44526	12.6966	-5.37623	-11.9404	3.98485	21.7704	-2.97092	-22.4792	13.4068	-13.0104	-0.469067	4.91968	0		DT733004	similar to UP|Q52QH4_ORYSA (Q52QH4) NAC protein, partial (34%)	NA	At5g08790.1	68418.m01042 no apical meristem (NAM) family protein contains Pfam PF02365: No apical meristem (NAM) domain;	1e-34	1e-34	-2.77094	-6.94231	-0.897975	11.9631	-0.649386	-9.68862	-2.71782	6.27211	-6.95767	5.68943	-3.33647	-2.68469	11.9631
TC8650	similar to PRF|NP_198322.1|15242808|NP_198322 GDSL-motif lipase/hydrolase family protein {Arabidopsis thaliana}, partial (95%)	GO:0016789	At5g33370.1	68418.m03962 GDSL-motif lipase/hydrolase family protein similar to family II lipase EXL3 (GI:15054386), EXL1 (GI:15054382), EXL2 (GI:15054384) [Arabidopsis thaliana]; contains Pfam profile PF00657: Lipase/Ac-TRUNCATED-	6.2e-147	6.2e-147	2.13608	8.80249	-4.40345	-11.7988	1.42788	10.3438	-1.35578	-15.7961	14.2778	-11.3967	-0.274471	2.98812	0		TC17801	similar to UP|ZIP4_ARATH (O04089) Zinc transporter 4, chloroplast precursor (ZRT/IRT-like protein 4), partial (84%)	GO:0005385;GO:0006812;GO:0046873;GO:0006826;GO:0006829;GO:0005381;GO:0030001;GO:0008324;GO:0016020	At1g10970.1	68414.m01259 metal transporter, putative (ZIP4) similar to Zn and Cd transporter ZNT1 [Thlaspi caerulescens] gi|7381054|gb|AAF61374; member of the Zinc (Zn2+)-Iron (Fe2+) permease (ZIP) family, PMID:11500563-TRUNCATED-	5.3e-134	5.3e-134	-1.99421	0.193144	-7.03547	11.9325	-0.515899	-2.4948	-8.36378	2.40324	-2.12453	0.177644	-5.9655	-3.11232	11.9325
DR918245	NA	NA	At1g04380.1	68414.m00428 2-oxoglutarate-dependent dioxygenase, putative Strong similarity to Arabidopsis 2A6 (gb|X83096), tomato ethylene synthesis regulatory protein E8 (SP|P10967)	9e-13	9e-13	2.69294	2.4811	-2.27635	-11.2511	3.65006	10.167	0.418668	-12.0027	2.46709	-5.70409	4.42721	7.35635	0		DR929343	similar to UP|Q7PTQ4_ANOG (Q7PTQ4) ENSANGP00000012927 (Fragment), partial (0%)	NA	NA	NA	NA	NA	-2.94651	-4.36503	-1.03998	11.9142	-0.336842	-6.34404	-3.1448	6.47171	-4.60044	2.81701	-3.41276	-2.44038	11.9142
TC16136	weakly similar to UP|Q39048_ARATH (Q39048) Cer2 protein, partial (24%)	NA	At4g24510.1	68417.m03514 eceriferum protein (CER2) identical to (CER2) [Arabidopsis thaliana] GI:1213594; contains Pfam profile PF02458: Transferase family	1.4e-71	1.4e-71	0.851515	-3.12022	4.07877	-10.9823	5.15006	4.55934	3.98278	-3.74008	-1.73431	-3.19698	13.7542	6.90219	0		TC12548	similar to UP|Q53C60_NEROL (Q53C60) Gibberellin 2 oxidase, partial (92%)	GO:0045543;GO:0045487	At1g30040.1	68414.m03673 gibberellin 2-oxidase / GA2-oxidase (GA2OX2) identical to GI:4678368 ga2ox2	5.6e-98	5.6e-98	-3.46708	-7.20406	-0.718964	11.7872	1.16461	-6.81055	-3.42371	6.18774	-9.56914	3.9273	-2.03783	-0.997809	11.7872
TC16210	weakly similar to UP|Q501D5_ARATH (Q501D5) At2g40550, partial (72%)	GO:0000004;GO:0005554;GO:0008372	At2g40550.1	68415.m05003 expressed protein	9.4e-176	9.4e-176	2.55495	11.9472	-7.3007	-10.7867	0.609351	10.7447	-1.7999	-18.7459	17.322	-6.03891	-1.26477	3.00329	0		TC10090	similar to UP|Q8VX11_LUPLU (Q8VX11) Diphosphonucleotide phosphatase 1 precursor, partial (96%)	GO:0004722;GO:0000004;GO:0005554;GO:0008372	At1g13750.1	68414.m01614 calcineurin-like phosphoesterase family protein contains Pfam profile: PF00149 calcineurin-like phosphoesterase	6.5e-263	6.5e-263	-11.3005	0.53578	0.644754	11.696	-0.431613	-7.07708	-8.01366	2.74507	-5.08902	-0.0721251	-7.99699	-2.42492	11.696
																					TC14665	weakly similar to UP|O81653_HEMSP (O81653) Senescence-associated protein 3 (Fragment), partial (54%)	NA	At5g10600.1	68418.m01227 cytochrome P450 family protein similar to Cytochrome P450 91A1 (SP:Q9FG65) {Arabidopsis thaliana} ; cytochrome P450, Helianthus tuberosus, EMBL:HTCYP81L	2.3e-126	2.3e-126	-2.16062	0.690892	0.356738	11.6542	-9.874	-8.38929	-0.916866	5.37231	-0.764107	6.53562	-10.2814	-9.49656	11.6542
																					TC15959	similar to UP|O82049_RIBNI (O82049) Mitochondrial carrier protein, partial (96%)	GO:0006810;GO:0005743;GO:0006839;GO:0005488	At1g07030.1	68414.m00749 mitochondrial substrate carrier family protein contains Pfam profile: PF00153 mitochondrial carrier protein	5.4e-125	5.4e-125	-1.19472	-8.10368	1.6953	11.6286	-1.49421	-9.52152	0.560761	9.50788	-6.12494	7.89601	-1.05622	-2.70173	11.6286
																					TC8316	similar to UP|OPR1_ARATH (Q8LAH7) 12-oxophytodienoate reductase 1 (12-oxophytodienoate-10,11-reductase 1) (OPDA-reductase 1) (AtOPR1) (FS-AT-I) , partial (97%)	GO:0016629;GO:0009695	At1g76680.1	68414.m08922 12-oxophytodienoate reductase (OPR1) identical to 12-oxophytodienoate reductase OPR1 GB:AAC78440 [Arabidopsis thaliana]	2e-159	2e-159	-6.10105	-6.31808	1.19061	11.5237	0.576911	-9.89557	-2.82357	9.92043	-10.0945	4.76224	-2.26777	-2.64305	11.5237
																					TC14298	similar to PDB|1B37_A|6730082|1B37_A Chain A, A 30 Angstrom U-Shaped Catalytic Tunnel In The Crystal Structure Of Polyamine Oxidase. {Zea mays}, partial (81%)	GO:0006595;GO:0046592	At5g13700.1	68418.m01595 polyamine oxidase, putative similar to SP|O64411 Polyamine oxidase precursor (EC 1.5.3.11) from Zea mays	6.2e-125	6.2e-125	-3.65987	-2.95116	0.317192	11.5203	-1.29885	-8.02572	-2.06381	4.51791	-7.11318	4.28292	-3.42242	-3.17738	11.5203
																					TC18198	similar to PRF|NP_194867.2|22329052|NP_194867 ABC1 family protein {Arabidopsis thaliana}, partial (17%)	NA	At4g31390.1	68417.m04452 ABC1 family protein contains Pfam domain, PF03109: ABC1 family	1.1e-46	1.1e-46	-2.2241	-3.7292	1.60367	11.5187	-3.09203	-10.2664	-0.437409	9.59146	-4.9004	6.71854	-2.77018	-4.10512	11.5187
																					TC10375	homologue to UP|CLAA_LYCES (P31541) ATP-dependent Clp protease ATP-binding subunit clpA homolog CD4A, chloroplast precursor , partial (91%)	GO:0009507;GO:0005524;GO:0016887;GO:0045037;GO:0009658;GO:0005739;GO:0009570;GO:0006510	At5g50920.1	68418.m06315 ATP-dependent Clp protease ATP-binding subunit / ClpC almost identical to ClpC GI:2921158 from [Arabidopsis thaliana]; contains Pfam profile PF02861: Clp amino terminal domain; contains Pfam pro-TRUNCATED-	0	0	-4.78715	-4.1041	-0.967071	11.4707	3.05118	-6.97985	-3.85958	4.91494	-4.04151	1.74094	-2.74939	-1.91422	11.4707
																					TC9674	similar to PRF|NP_567817.1|18417257|NP_567817 expressed protein {Arabidopsis thaliana}, partial (66%)	GO:0000004;GO:0005554;GO:0008372	At4g28740.1	68417.m04110 expressed protein	3e-92	3e-92	-3.89427	-1.69102	3.10942	11.4368	-2.60313	-11.3846	-1.71322	10.8603	-5.67479	3.46618	-4.25923	-6.49535	11.4368
																					TC18857	weakly similar to UP|Q945N6_ARATH (Q945N6) AT5g10490/F12B17_160, partial (14%)	NA	At5g10490.1	68418.m01215 mechanosensitive ion channel domain-containing protein / MS ion channel domain-containing protein contains Pfam profile PF00924: Mechanosensitive ion channel	4.7e-16	4.7e-16	-1.80455	-4.05707	-4.30701	11.3322	3.96249	-3.09738	-3.20606	3.08299	-7.12911	1.66512	-1.74086	1.33924	11.3322
																					TC10623	weakly similar to UP|Q9SHK4_ARATH (Q9SHK4) F12K11.6, partial (12%)	GO:0009692;GO:0016757;GO:0016491;GO:0016706;GO:0008372	At1g06620.1	68414.m00699 2-oxoglutarate-dependent dioxygenase, putative similar to 2A6 (GI:599622) and tomato ethylene synthesis regulatory protein E8 (SP|P10967); contains Pfam profile: PF00671 Iron/Ascorbate oxidoredu-TRUNCATED-	2e-109	2e-109	-2.97839	-5.25442	-2.46265	11.2067	1.59039	-5.24937	-3.5997	4.41843	-5.0146	2.66406	-2.5538	-0.931638	11.2067
																					TC18071	similar to UP|Q9M4V1_ELAGV (Q9M4V1) Glycerol-3-phosphate acyltransferase , partial (40%)	NA	At1g32200.1	68414.m03960 glycerol-3-phosphate acyltransferase, chloroplast (ATS1) identical to SP|Q43307|PLSB_ARATH Glycerol-3-phosphate acyltransferase, chloroplast precursor (EC 2.3.1.15) (GPAT) (ATS1) {Arabidopsis th-TRUNCATED-	1.4e-71	1.4e-71	-3.21864	-3.99718	1.08419	11.15	0.080915	-6.92773	-2.25994	8.20017	-8.8936	3.73804	-2.21294	-2.41717	11.15
																					TC17596	similar to UP|Q9LD83_ARATH (Q9LD83) T12C24.3 (F5O11.23) (At1g12480/T12C24_4), partial (34%)	NA	At1g12480.1	68414.m01443 C4-dicarboxylate transporter/malic acid transport family protein contains Pfam profile PF03595: C4-dicarboxylate transporter/malic acid transport protein	5e-90	5e-90	-3.6821	-2.37689	-2.04398	11.1369	-0.870169	-4.7031	-3.10693	5.92794	-4.4753	2.91666	-4.4265	-3.50135	11.1369
																					TC10404	weakly similar to PRF|NP_192096.1|15234357|NP_192096 tolB protein-related {Arabidopsis thaliana}, partial (40%)	NA	At4g01870.1	68417.m00245 tolB protein-related contains weak similarity to TolB protein precursor (Swiss-Prot:P44677) [Haemophilus influenzae]	7.3e-105	7.3e-105	-4.72461	-4.37755	-3.15836	11.1193	4.42577	-4.02688	-7.00453	3.21341	-7.52209	0.147212	-3.14131	-0.325414	11.1193
																					TC11888	weakly similar to UP|P93547_SPIOL (P93547) Peroxidase precursor , partial (83%)	GO:0004601	At1g71695.1	68414.m08281 peroxidase 12 (PER12) (P12) (PRXR6) identical to SP|Q96520 Peroxidase 12 precursor (EC 1.11.1.7) (Atperox P12) (PRXR6) (ATP4a) {Arabidopsis thaliana}	3.6e-96	3.6e-96	-3.66779	-3.19312	0.0501125	10.9233	-0.23426	-6.43119	-3.14746	7.00834	-6.99846	2.91827	-2.98255	-3.45684	10.9233
																					TC13005	similar to UP|Q8LP14_PEA (Q8LP14) Nine-cis-epoxycarotenoid dioxygenase4, partial (36%)	NA	At4g19170.1	68417.m02829 9-cis-epoxycarotenoid dioxygenase, putative / neoxanthin cleavage enzyme, putative / carotenoid cleavage dioxygenase, putative similar to 9-cis-epoxycarotenoid dioxygenase [Phaseolus vulgaris][G-TRUNCATED-	1.2e-79	1.2e-79	-3.71321	-0.426262	-7.49759	10.6703	3.57786	-1.17195	-9.46814	1.36067	-4.65493	-1.57359	-6.48723	-1.06666	10.6703
																					DR943433	similar to UP|Q52QX9_MANES (Q52QX9) Aldo/keto reductase AKR, partial (72%)	NA	At1g60730.1	68414.m06836 aldo/keto reductase family protein contains Pfam profile PF00248: oxidoreductase, aldo/keto reductase family	1.6e-102	1.6e-102	3.05332	-7.98147	-1.43441	10.6342	-2.82673	-4.92452	1.65391	4.82541	-1.83515	9.63989	-0.706575	0.629478	10.6342
																					TC11922	weakly similar to UP|Q9FQF3_SOYBN (Q9FQF3) Glutathione S-transferase GST 5 , partial (66%)	GO:0004364	At1g10360.1	68414.m01167 glutathione S-transferase, putative similar to glutathione S-transferase (sp|Q03666|GTX4_TOBAC); similar to EST gb|H36275 gb:AB039930.	4.7e-55	4.7e-55	-5.59325	0.461741	-0.421788	10.5225	-1.69622	-5.18876	-5.39151	4.81125	-4.47116	0.945115	-7.43631	-6.40996	10.5225
																					TC8879	weakly similar to UP|Q9LUC6_ARATH (Q9LUC6) Cytochrome P450 (AT3g14680/MIE1_18), partial (62%)	GO:0019825	At3g14690.1	68416.m01858 cytochrome P450, putative similar to GB:Q05047 from [Catharanthus roseus]	1.4e-158	1.4e-158	-4.41239	-8.34484	0.501164	10.5133	2.36132	-7.33977	-1.96414	4.86276	-8.79702	3.94461	-0.675604	-1.07191	10.5133
																					DR941739	weakly similar to PRF|NP_190811.1|15231218|NP_190811 phytoalexin-deficient 4 protein (PAD4) {Arabidopsis thaliana}, partial (15%)	NA	At3g52430.1	68416.m05766 phytoalexin-deficient 4 protein (PAD4) identical to phytoalexin-deficient 4 protein [Arabidopsis thaliana] GI:6457331; contains Pfam profile PF01764: Lipase	5.6e-59	5.6e-59	-4.13083	-3.80379	-4.7248	10.3833	4.17929	-2.54117	-8.16624	2.52337	-6.61495	-0.420594	-3.50481	0.165826	10.3833
																					TC16697	weakly similar to PIR|T47874|T47874 scarecrow-like protein {Arabidopsis thaliana}, partial (18%)	NA	At4g00150.1	68417.m00015 scarecrow-like transcription factor 6 (SCL6)	2.6e-84	2.6e-84	2.58484	-4.69241	-1.20124	10.3736	-4.92181	-4.7462	0.633233	5.38257	-1.10685	3.6042	-3.22012	-1.89255	10.3736
																					TC16313	similar to UP|ZIP4_ARATH (O04089) Zinc transporter 4, chloroplast precursor (ZRT/IRT-like protein 4), partial (72%)	GO:0006812;GO:0046873;GO:0030001;GO:0016020;GO:0008324	At1g60960.1	68414.m06862 metal transporter, putative (IRT3) identical to putative metal transporter IRT3 [Arabidopsis thaliana] gi|17385796|gb|AAL38438; similar to iron-regulated transporter 1 [Lycopersicon esculentum] -TRUNCATED-	1.9e-123	1.9e-123	-1.16664	-5.38921	-0.0356174	10.3185	-2.06743	-6.11083	-0.764571	5.5287	-4.66195	5.52149	-1.58774	-2.53974	10.3185
																					TC15221	similar to UP|Q68BJ8_MALDO (Q68BJ8) Sorbitol transporter, partial (39%)	NA	At2g16120.1	68415.m01848 mannitol transporter, putative similar to mannitol transporter [Apium graveolens var. dulce] GI:12004316; contains Pfam profile PF00083: major facilitator superfamily protein	3e-79	3e-79	1.44021	-2.01681	-5.03228	10.2407	-2.90733	-3.05817	-1.14312	1.46341	-0.382221	4.31381	-4.14177	-0.780882	10.2407
																					TC9596	weakly similar to PRF|NP_171723.2|30678265|NP_171723 CER1 protein {Arabidopsis thaliana}, partial (74%)	GO:0003824;GO:0042335;GO:0008372	At1g02205.2	68414.m00154 CER1 protein identical to maize gl1 homolog (glossy1 locus) GI:1209703 and CER1 GI:1199467 from [Arabidopsis thaliana]	2.7e-217	2.7e-217	-8.67569	0.435312	0.185435	10.2281	-1.13358	-8.69804	-5.40914	8.13562	-4.92332	0.439126	-6.7223	-5.52437	10.2281
																					DR924180	weakly similar to UP|Q93Z23_ARATH (Q93Z23) At1g52190/F9I5_4, partial (46%)	NA	At1g52190.1	68414.m05889 proton-dependent oligopeptide transport (POT) family protein contains Pfam profile: PF00854 POT family	6.6e-56	6.6e-56	-5.96378	-3.55194	-0.118568	10.2176	1.60787	-6.38132	-3.54452	5.92905	-8.39588	1.40173	-3.04378	-2.83045	10.2176
																					TC14717	weakly similar to PRF|NP_974703.1|42573213|NP_974703 mitochondrial transcription termination factor-related / mTERF-related {Arabidopsis thaliana}, partial (75%)	GO:0000004;GO:0005554;GO:0008372	At4g38160.1	68417.m05387 mitochondrial transcription termination factor-related / mTERF-related contains Pfam profile PF02536: mTERF	2.1e-116	2.1e-116	-8.38104	1.77353	0.0500403	10.1765	-1.15652	-6.19103	-5.46702	8.62338	-6.66031	-0.237411	-5.87814	-8.03123	10.1765
																					TC18231	weakly similar to UP|Q39086_ARATH (Q39086) Receptor kinase , partial (34%)	NA	At1g11330.1	68414.m01301 S-locus lectin protein kinase family protein contains Pfam domains, PF00954: S-locus glycoprotein family, PF00069: Protein kinase domain, and PF01453: Lectin (probable mannose binding)	2.7e-107	2.7e-107	-3.34244	-5.60632	-1.48989	10.1594	1.21334	-5.50504	-3.8239	6.26926	-6.50242	3.04556	-2.71783	-1.3348	10.1594
																					TC11976	weakly similar to UP|Q69TY8_ORYSA (Q69TY8) Receptor protein kinase-like, partial (16%)	NA	At2g33580.1	68415.m04115 protein kinase family protein / peptidoglycan-binding LysM domain-containing protein protein kinase [Arabidopsis thaliana] GI:2852449; contains Pfam profiles PF01476: LysM domain, PF00069: Prote-TRUNCATED-	2.4e-102	2.4e-102	-9.91547	-1.08499	-2.47263	10.1465	2.95416	-4.87834	-7.24167	4.01599	-5.68956	-1.07623	-3.69517	-3.6796	10.1465
																					TC14102	similar to PIR|T09022|T09022 beta-glucosidase homolog T27E11.70 {Arabidopsis thaliana}, partial (38%)	NA	At1g02850.1	68414.m00247 glycosyl hydrolase family 1 protein contains Pfam PF00232 : Glycosyl hydrolase family 1 domain; TIGRFAM TIGR01233: 6-phospho-beta-galactosidase; similar to hydroxyisourate hydrolase (GI:19569603-TRUNCATED-	4e-85	4e-85	-3.013	-3.26746	0.937697	10.0622	-2.16234	-7.05778	-2.17964	8.48056	-5.16336	4.12612	-3.71034	-4.05191	10.0622
																					DT749698	similar to UP|Q9LUC5_ARATH (Q9LUC5) Cytochrome P450, partial (34%)	NA	At3g14680.1	68416.m01857 cytochrome P450, putative similar to GB:Q05047 from [Catharanthus roseus]	3.1e-81	3.1e-81	-3.93453	-9.10336	1.34842	10.051	1.95588	-6.66341	-1.88886	9.64928	-12.542	4.34944	-0.321517	-1.11371	0
																					TC15030	similar to UP|Q6Z001_ORYSA (Q6Z001) Membrane protein-like, partial (79%)	GO:0000004;GO:0005554;GO:0008372	At2g25737.1	68415.m03087 expressed protein contains Pfam profile: PF01925 domain of unknown function DUF81	2.2e-151	2.2e-151	-8.43279	1.08623	-4.30374	10.151	2.31476	-4.35223	-13.6307	4.1814	-6.5495	-2.43133	-8.17239	-4.60488	0
																					TC13009	weakly similar to PRF|NP_172810.1|15222868|NP_172810 expressed protein {Arabidopsis thaliana}, partial (14%)	NA	At1g13520.1	68414.m01585 expressed protein	6.6e-72	6.6e-72	-2.58974	-12.3158	-2.46842	10.1553	6.38504	-4.68352	-3.7818	4.64836	-11.7945	2.4843	0.610733	2.51477	0
																					TC19592	weakly similar to PRF|NP_974314.1|42572437|NP_974314 expressed protein {Arabidopsis thaliana}, partial (66%)	GO:0005554	At1g29050.1	68414.m03556 expressed protein similar to hypothetical protein GB:AAB67625 GI:2342727 from [Arabidopsis thaliana]	6.9e-109	6.9e-109	2.73816	-11.2918	3.13615	10.1749	-5.9756	-12.4359	3.47113	12.1156	-4.57287	15.3202	0.631523	-1.64691	0
																					TC15730	similar to PRF|NP_173116.1|15219328|NP_173116 expressed protein {Arabidopsis thaliana}, partial (79%)	GO:0005554	At1g16720.1	68414.m02005 expressed protein	2.3e-227	2.3e-227	-2.32447	-6.51888	4.16109	10.1811	-6.29472	-18.412	2.97515	17.4271	-6.14422	6.92383	-2.00812	-6.63513	0
																					TC15625	similar to PRF|NP_974753.1|42573313|NP_974753 transcriptional regulator Sir2 family protein {Arabidopsis thaliana}, partial (78%)	GO:0006342;GO:0005677;GO:0003677;GO:0006355	At5g09230.1	68418.m01050 transcriptional regulator Sir2 family protein contains Pfam domain PF02146: transcriptional regulator, Sir2 family;	3.1e-134	3.1e-134	0.155439	-6.94261	5.16489	10.19	-4.71956	-12.0101	4.27205	12.2945	-6.16265	9.31926	0.158721	-3.45427	0
																					TC11513	similar to UP|Q85V22_ORYSA (Q85V22) Histidine amino acid transporter, partial (94%)	GO:0015359;GO:0005279;GO:0006865;GO:0016020	At5g40780.1	68418.m04950 lysine and histidine specific transporter, putative strong similarity to lysine and histidine specific transporter GI:2576361 from [Arabidopsis thaliana]; contains Pfam profile PF01490: Transmem-TRUNCATED-	6.1e-192	6.1e-192	-10.2726	-3.27943	-1.75782	10.2381	5.84148	-5.75647	-6.65512	6.24872	-13.2451	-1.5327	-4.59911	-2.35986	0
																					TC15934	similar to UP|Q6SYB1_TRIPR (Q6SYB1) GTP-binding protein TypA, partial (53%)	GO:0005525;GO:0003746	At5g13650.1	68418.m01584 elongation factor family protein contains Pfam profiles: PF00009 elongation factor Tu GTP binding domain,PF00679 elongation factor G C-terminus, PF03144 elongation factor Tu domain 2	3.5e-160	3.5e-160	-2.44519	-5.88955	5.67777	10.2452	-5.22489	-15.8088	1.54442	13.1316	-9.04286	5.69937	-1.28568	-7.22277	0
																					TC15693	similar to PRF|NP_191155.1|15228783|NP_191155 NLI interacting factor (NIF) family protein {Arabidopsis thaliana}, partial (66%)	GO:0000004;GO:0005554;GO:0008372	At3g55960.1	68416.m06218 NLI interacting factor (NIF) family protein contains Pfam profile PF03031: NLI interacting factor	5.1e-73	5.1e-73	-12.173	-1.36249	-1.83031	10.282	2.97727	-6.20868	-9.74462	5.88251	-8.60526	-1.17025	-6.75896	-3.60806	0
																					TC10122	similar to UP|O49931_PEA (O49931) Rieske iron-sulfur protein Tic55 precursor, partial (81%)	GO:0009055;GO:0045036;GO:0009706	At2g24820.1	68415.m02969 Rieske [2Fe-2S] domain-containing protein similar to Rieske iron-sulfur protein Tic55 from Pisum sativum [gi:2764524]; contains Pfam PF00355 Rieske [2Fe-2S] domain	5.3e-205	5.3e-205	-1.83878	-13.4971	3.36612	10.2929	-0.548754	-13.0132	1.02304	14.562	-12.853	9.37183	0.405914	-2.0918	0
																					TC15797	similar to UP|Q58IU5_NICBE (Q58IU5) Non-intrinsic ABC protein (Fragment), partial (89%)	GO:0005515;GO:0009507;GO:0016226;GO:0009536;GO:0006879;GO:0042626;GO:0004009;GO:0005215;GO:0005554	At4g04770.1	68417.m00699 ATP-binding-cassette transporter (ABC1) Identical to the protein described in PMID:11156608 and note that sequence was not deposited into GenBank by the authors.	8.2e-232	8.2e-232	-1.99472	-7.35649	3.55241	10.3928	-3.48856	-12.0892	0.829996	10.2391	-7.68116	8.33541	-1.30767	-4.36073	0
																					TC18749	weakly similar to PRF|NP_683316.1|22329697|NP_683316 auxin efflux carrier family protein {Arabidopsis thaliana}, partial (71%)	GO:0009672;GO:0009926	At1g76530.1	68414.m08906 auxin efflux carrier family protein contains auxin efflux carrier domain, Pfam:PF03547	1.3e-105	1.3e-105	-0.746407	-17.5552	3.86705	10.3934	-0.262019	-12.8116	1.89621	10.5246	-13.5181	10.3464	1.9527	-0.875073	0
																					TC15247	similar to PRF|NP_568150.1|18414821|NP_568150 ABC1 family protein {Arabidopsis thaliana}, partial (89%)	GO:0005554	At5g05200.1	68418.m00554 ABC1 family protein contains Pfam domain, PF03109: ABC1 family	3.3e-212	3.3e-212	-2.95255	-9.84422	7.39784	10.4119	-4.00797	-18.215	3.40367	20.2007	-12.4766	9.01811	-0.105205	-5.25249	0
																					TC19281	similar to UP|Q9FN89_ARATH (Q9FN89) GTP cyclohydrolase II; 3,4-dihydroxy-2-butanone-4-phoshate synthase (AT5g59750/mth12_150), partial (60%)	GO:0003935;GO:0008686;GO:0008372;GO:0009231	At5g59750.1	68418.m07489 riboflavin biosynthesis protein, putative similar to SP|P50855 Riboflavin biosynthesis protein ribA [Includes: GTP cyclohydrolase II (EC 3.5.4.25); 3,4-dihydroxy-2-butanone 4-phosphate synthase -TRUNCATED-	6.7e-130	6.7e-130	-2.89905	-1.84729	0.32427	10.4197	-3.26087	-7.57484	-1.57343	10.5624	-5.7298	6.11707	-4.75451	-5.63983	0
																					TC10358	similar to PRF|NP_197417.1|15239660|NP_197417 expressed protein {Arabidopsis thaliana}, partial (74%)	GO:0000004;GO:0005554;GO:0008372	At5g19160.1	68418.m02281 expressed protein predicted proteins, Arabidopsis thaliana and Oryza sativa; expression supported by MPSS	5.4e-164	5.4e-164	-3.49502	-4.99758	2.13114	10.4598	-2.33492	-8.51157	-1.47375	11.6372	-9.05525	4.91841	-2.86413	-3.96646	0
																					TC13057	weakly similar to PRF|NP_199780.1|15240534|NP_199780 UDP-glucoronosyl/UDP-glucosyl transferase family protein {Arabidopsis thaliana}, partial (33%)	NA	At2g22590.1	68415.m02678 glycosyltransferase family protein contains Pfam profile: PF00201 UDP-glucoronosyl and UDP-glucosyl transferase	1.5e-106	1.5e-106	-0.141054	-8.33784	5.15577	10.4703	-4.31762	-13.0137	2.16917	5.66604	-4.70084	12.0092	0.0404755	-3.38542	0
																					TC10371	weakly similar to UP|Q589Y1_TOBAC (Q589Y1) Glycosyltransferase NTGT5b, partial (57%)	NA	At1g22340.1	68414.m02795 UDP-glucoronosyl/UDP-glucosyl transferase family protein contains Pfam profile: PF00201 UDP-glucoronosyl and UDP-glucosyl transferase; similar to UDP-glucose glucosyltransferase GI:3928543 from -TRUNCATED-	1.5e-136	1.5e-136	-5.20296	-5.46206	2.7968	10.5238	-2.55972	-11.4837	-1.74586	16.9869	-7.95062	6.90711	-4.57827	-6.55737	0
																					TC13013	weakly similar to UP|Q45KQ0_TOBAC (Q45KQ0) Cellulose synthase-like protein CslE, partial (41%)	NA	At1g55850.1	68414.m06405 cellulose synthase family protein similar to cellulose synthase catalytic subunit [gi:13925881] from Nicotiana alata, cellulose synthase-5 [gi:9622882] from Zea mays	3.4e-126	3.4e-126	-3.83347	-3.94972	3.25355	10.5421	-4.98274	-14.4584	-0.77884	18.9328	-5.62094	8.78245	-5.03733	-7.80692	0
																					TC17691	NA	NA	At3g59310.1	68416.m06611 expressed protein identical to anthocyanin-related membrane protein 1 [Arabidopsis thaliana] GI:16416383; supporting cDNA gi|16416382|dbj|AB060644.1|	3.2e-72	3.2e-72	-7.52517	-4.6618	6.69763	10.5721	-3.71764	-21.8806	-1.14618	20.8076	-12.7177	6.72527	-2.64576	-10.8272	0
																					TC19764	similar to PRF|NP_565087.1|18410661|NP_565087 expressed protein {Arabidopsis thaliana}, partial (82%)	GO:0005554	At1g74640.1	68414.m08644 expressed protein contains Pfam profile: PF00561 alpha/beta hydrolase fold	2.9e-126	2.9e-126	-3.82532	-7.38842	5.1889	10.6999	-4.24472	-10.66	1.46913	19.7418	-8.5362	7.64215	-1.12216	-6.04515	0
																					DT752276	similar to UP|Q765V9_ADICA (Q765V9) Phototropin 2, partial (3%)	NA	At5g58140.4	68418.m07274 protein kinase family protein / non phototropic hypocotyl 1-like protein (NPL1) contains Pfam domains, PF00069: Protein kinase domain and PF00785: PAC motif; similar to SP:O48963 Nonphototropi-TRUNCATED-	1.1e-09	1.1e-09	-8.69135	-4.57948	3.16284	10.7063	0.435397	-12.6188	-3.27796	11.1108	-12.6344	3.05532	-2.63627	-5.05305	0
																					TC17196	weakly similar to UP|Q534U4_9SOLA (Q534U4) SAMT (Fragment), partial (50%)	NA	At3g11480.1	68416.m01400 S-adenosyl-L-methionine:carboxyl methyltransferase family protein similar to SAM:benzoic acid carboxyl methyltransferase (BAMT)[GI:9789277][Antirrhinum majus] and to SAM:salicylic acid carboxyl -TRUNCATED-	2.3e-78	2.3e-78	-6.22494	-5.04228	4.70824	10.7296	-4.04122	-17.2331	-0.0825455	14.6651	-10.8681	8.28002	-3.27554	-8.10525	0
																					TC16175	similar to UP|Q5UFQ8_MALDO (Q5UFQ8) Protein disulfide isomerase (Fragment), partial (92%)	NA	At1g60420.1	68414.m06802 DC1 domain-containing protein contains Pfam domain PF03107: DC1 domain	9.9e-85	9.9e-85	3.61854	-7.77057	-13.8606	10.8102	4.4183	0.830102	-5.04056	-0.878604	-2.38396	2.14433	-1.95638	7.044	0
																					TC10730	similar to PRF|NP_563666.1|18379020|NP_563666 glycosyl hydrolase family 1 protein {Arabidopsis thaliana}, partial (61%)	GO:0004553	At3g62750.1	68416.m07049 glycosyl hydrolase family 1 protein contains Pfam PF00232 : Glycosyl hydrolase family 1 domain; similar to hydroxyisourate hydrolase (GI:19569603) [Glycine max]	1.2e-116	1.2e-116	-3.30699	-6.13285	3.72266	10.8914	-1.20473	-11.0234	0.0122583	12.2649	-5.75218	4.03681	-0.92503	-4.63698	0
																					TC17633	similar to PRF|NP_171956.2|30678943|NP_171956 coenzyme F420 hydrogenase family / dehydrogenase, beta subunit family {Arabidopsis thaliana}, partial (92%)	GO:0050454	At1g04620.1	68414.m00456 coenzyme F420 hydrogenase family / dehydrogenase, beta subunit family contains Pfam PF04432: Coenzyme F420 hydrogenase/dehydrogenase, beta domain; similar to Coenzyme F420 hydrogenase beta subun-TRUNCATED-	1.1e-204	1.1e-204	-1.7615	-5.75928	3.82627	10.9991	-4.79659	-16.151	0.978112	13.8661	-6.41796	8.59041	-1.89045	-6.83237	0
																					TC13122	weakly similar to UP|Q4ZJF7_SOYBN (Q4ZJF7) Tyrosine aminotransferase, partial (66%)	GO:0009058;GO:0008483;GO:0008372	At5g53970.1	68418.m06714 aminotransferase, putative similar to nicotianamine aminotransferase from Hordeum vulgare [GI:6498122, GI:6469087]; contains Pfam profile PF00155 aminotransferase, classes I and II	5.7e-105	5.7e-105	0.728758	-17.8557	1.28298	11.0658	0.898478	-9.28024	1.91816	7.91651	-9.966	10.5064	2.80766	1.10839	0
																					TC16976	similar to UP|Q8LLD9_SOLTU (Q8LLD9) BEL1-related homeotic protein 29 (Fragment), partial (45%)	NA	At2g35940.1	68415.m04411 homeodomain-containing protein contains 'Homeobox' domain signature, Prosite:PS00027	4.7e-95	4.7e-95	-0.739464	-22.7234	1.32972	11.0864	4.36204	-8.14926	0.496757	8.90137	-12.7138	8.53828	3.07305	2.41244	0
																					TC11121	weakly similar to UP|Q948K9_CUCME (Q948K9) CmE8 protein, partial (81%)	GO:0009692;GO:0016757;GO:0016491;GO:0016706;GO:0008372	At1g06620.1	68414.m00699 2-oxoglutarate-dependent dioxygenase, putative similar to 2A6 (GI:599622) and tomato ethylene synthesis regulatory protein E8 (SP|P10967); contains Pfam profile: PF00671 Iron/Ascorbate oxidoredu-TRUNCATED-	3.7e-117	3.7e-117	-0.188688	-14.1455	5.75723	11.1572	-2.91789	-17.5132	3.22386	17.0705	-10.5422	17.1446	2.2717	-1.8272	0
																					TC16514	weakly similar to UP|Q84MB3_ARATH (Q84MB3) At1g06620, partial (72%)	GO:0009692;GO:0016706	At1g06620.1	68414.m00699 2-oxoglutarate-dependent dioxygenase, putative similar to 2A6 (GI:599622) and tomato ethylene synthesis regulatory protein E8 (SP|P10967); contains Pfam profile: PF00671 Iron/Ascorbate oxidoredu-TRUNCATED-	1.9e-104	1.9e-104	1.46584	-10.7053	1.031	11.2018	-2.61134	-8.27159	1.55777	6.66046	-5.25991	11.7623	-0.371307	-0.916327	0
																					TC10044	similar to UP|Q9ZSN8_ARATH (Q9ZSN8) CTF2A (Fragment), partial (86%)	GO:0004497	At2g35660.1	68415.m04373 monooxygenase family protein nearly identical to CTF2A [GI:4164576][Plant Physiol. 119, 364 (1999), PGR99-008]	2.8e-167	2.8e-167	-1.46522	-6.3896	7.20801	11.3887	-7.6816	-17.8234	3.17898	11.8943	-4.877	12.6246	-2.08516	-8.83986	0
																					TC10411	similar to UP|Q9AXK9_9MAGN (Q9AXK9) Lycopene epsilon-cyclase, partial (89%)	GO:0009507;GO:0016120;GO:0045435	At5g57030.1	68418.m07118 lycopene epsilon cyclase identical to lycopene epsilon cyclase [GI:1399181]	5.1e-200	5.1e-200	-4.34173	-2.15224	5.52962	11.4749	-7.23457	-15.2136	-0.280117	13.1989	-6.30701	7.05893	-4.08034	-12.0437	0
																					TC13501	similar to UP|Q41384_SPIOL (Q41384) Protein kinase (Fragment) , partial (35%)	NA	At5g58140.1	68418.m07275 protein kinase family protein / non phototropic hypocotyl 1-like protein (NPL1) contains Pfam domains, PF00069: Protein kinase domain and PF00785: PAC motif; similar to SP:O48963 Nonphototropi-TRUNCATED-	3.4e-116	3.4e-116	-9.09628	-4.21831	3.68808	11.4987	0.186536	-10.7026	-3.30303	14.9244	-16.5681	3.17901	-3.20892	-6.60093	0
																					TC11710	similar to UP|Q66NX3_9ROSI (Q66NX3) Polyphenol oxidase , partial (34%)	NA	At2g04620.1	68415.m00470 cation efflux family protein potential member of the cation diffusion facilitator (CDF) family, or cation efflux (CE) family, see PMID:11500563	6.2	0.998	-3.40813	-10.9482	-3.60698	11.5108	6.60817	-4.83447	-5.84754	4.63969	-11.6401	1.83307	-0.529125	2.17049	0
																					TC19674	weakly similar to UP|Q9FZ95_ARATH (Q9FZ95) F3H9.12 protein, partial (44%)	NA	At1g28220.1	68414.m03464 purine permease, putative similar to purine permease GI:7620007 from [Arabidopsis thaliana]	2e-74	2e-74	-5.95906	-7.67701	3.31433	11.6337	0.553328	-9.8396	-1.56153	8.73436	-14.164	4.36434	-1.07623	-3.44891	0
																					TC19999	similar to UP|Q9FMX6_ARATH (Q9FMX6) Gb|AAD21732.1, partial (30%)	NA	At5g23240.1	68418.m02719 DNAJ heat shock N-terminal domain-containing protein low similarity to SP|O34136 Chaperone protein dnaJ (40 kDa heat shock chaperone protein) (HSP40) {Deinococcus proteolyticus}; contains Pfam p-TRUNCATED-	1.8e-78	1.8e-78	2.41933	-19.036	0.306611	11.6352	-0.590491	-9.79009	2.14391	9.72548	-8.43871	12.4986	1.74649	1.38689	0
																					TC8210	similar to UP|Q6DV45_CAMSI (Q6DV45) Flavanone 3-hydroxylase, partial (92%)	GO:0045486;GO:0009813	At3g51240.1	68416.m05609 naringenin 3-dioxygenase / flavanone 3-hydroxylase (F3H) identical to GI:3790548	1.1e-161	1.1e-161	-8.33518	-4.69839	5.89902	11.6983	-3.55975	-20.0857	-0.873528	19.9595	-10.7046	6.82971	-3.66066	-7.77501	0
																					TC9109	NA	GO:0016491;GO:0008372	At1g68540.1	68414.m07830 oxidoreductase family protein similar to cinnamoyl CoA reductase [Eucalyptus gunnii, gi:2058311], cinnamyl-alcohol dehydrogenase, E. gunnii [gi:1143445], CPRD14 protein, Vigna unguiculata [gi:18-TRUNCATED-	2.1e-123	2.1e-123	-3.50396	-3.85251	4.01235	11.7053	-3.67177	-12.1335	-0.419269	11.485	-9.79707	8.08234	-3.08115	-7.35182	0
																					TC9733	weakly similar to UP|Q9ZTY8_9SOLN (Q9ZTY8) Glucose acyltransferase, partial (50%)	NA	At5g09640.1	68418.m01115 sinapoylglucose:choline sinapoyltransferase (SNG2) GC donor splice site at exon 11 and 13; TA donor splice site at exon 10; similar to serine carboxypeptidase I precursor (SP:P37890) [Oryza sati-TRUNCATED-	1.3e-116	1.3e-116	-12.1644	-5.16546	8.9983	12.1926	-3.02694	-23.4071	-1.43768	29.0494	-18.0449	8.22204	-3.94171	-14.1756	0
																					TC15949	NA	NA	At5g53390.1	68418.m06634 expressed protein	5.1e-39	5.1e-39	-2.99837	-13.2821	5.18316	12.3435	-0.489164	-18.468	1.51036	14.8861	-13.6936	11.8759	1.26651	-2.86517	0
																					TC8138	homologue to UP|Q9ZP50_TOBAC (Q9ZP50) FtsH-like protein Pftf precursor, partial (93%)	GO:0009507;GO:0008237;GO:0016887;GO:0008270;GO:0009535;GO:0004176;GO:0006510	At2g30950.1	68415.m03775 FtsH protease (VAR2) identical to zinc dependent protease VAR2 GI:7650138 from [Arabidopsis thaliana]	0	0	-2.11699	-11.912	5.92683	12.3583	-3.67195	-14.8619	2.98178	7.06172	-5.67647	11.7343	-0.0510118	-3.20205	0
																					TC13517	weakly similar to PRF|NP_175981.2|22330270|NP_175981 cellulose synthase family protein {Arabidopsis thaliana}, partial (13%)	NA	At1g55850.1	68414.m06405 cellulose synthase family protein similar to cellulose synthase catalytic subunit [gi:13925881] from Nicotiana alata, cellulose synthase-5 [gi:9622882] from Zea mays	3.6e-71	3.6e-71	-4.72187	-3.7877	3.85332	12.3726	-4.23653	-14.6706	-0.63166	16.8892	-6.19981	7.21706	-3.98293	-7.5331	0
																					TC11441	similar to UP|Q93V70_ARATH (Q93V70) At1g21000/F9H16_1, partial (63%)	GO:0000004;GO:0005488	At1g21000.1	68414.m02628 zinc-binding family protein similar to zinc-binding protein [Pisum sativum] GI:16117799; contains Pfam profile PF04640 : Protein of unknown function, DUF597	1.1e-80	1.1e-80	-3.41293	-11.8765	4.07488	12.3915	0.287321	-10.8975	0.666201	17.0558	-14.5068	7.24349	0.870548	-1.66244	0
																					TC17534	weakly similar to UP|Q589Y3_TOBAC (Q589Y3) Glucosyltransferase NTGT4, partial (66%)	GO:0016757;GO:0016758;GO:0012505;GO:0008194	At2g36760.1	68415.m04509 UDP-glucoronosyl/UDP-glucosyl transferase family protein contains Pfam profile: PF00201 UDP-glucoronosyl and UDP-glucosyl transferase	7.9e-140	7.9e-140	-11.6729	3.07107	0.624718	12.6296	-4.44563	-9.4569	-4.41529	9.89559	-5.39699	0.814109	-10.3827	-12.7549	0
																					TC9974	similar to UP|P93799_VITVI (P93799) Dihydroflavonol 4-reductase , partial (97%)	GO:0009718;GO:0045552	At5g42800.1	68418.m05213 dihydroflavonol 4-reductase (dihydrokaempferol 4-reductase) (DFR) nearly identical to GI:166686	1.4e-135	1.4e-135	-14.7058	-4.89088	9.11911	12.8022	-2.69699	-19.5858	-1.9815	29.131	-18.3638	6.63468	-3.99837	-13.3488	0
																					TC18962	weakly similar to UP|O81816_ARATH (O81816) Monooxygenase 2 (MO2) , partial (37%)	NA	At5g05320.1	68418.m00573 monooxygenase, putative (MO3) similar to GI:3426064; identical to cDNA monooxygenase 3, partial GI:3426065	5.8e-73	5.8e-73	-2.29882	-14.4733	4.62997	12.8874	-0.608748	-13.6592	1.13033	12.1468	-14.5913	10.363	0.776367	-2.51038	0
																					TC16123	similar to PRF|NP_195371.1|15234433|NP_195371 hydrolase, alpha/beta fold family protein {Arabidopsis thaliana}, partial (74%)	GO:0016787	At4g36530.2	68417.m05187 hydrolase, alpha/beta fold family protein low similarity to hydrolase [Sphingomonas sp.] GI:3426124; contains Pfam profile PF00561: hydrolase, alpha/beta fold family	2.7e-139	2.7e-139	-4.10274	-6.20935	6.1986	13.178	-5.20055	-20.0702	1.26073	18.3711	-8.64579	10.1313	-2.67776	-6.71197	0
																					TC18882	weakly similar to UP|O23400_ARATH (O23400) Indole-3-acetate beta-glucosyltransferase, partial (55%)	GO:0016757;GO:0008194;GO:0008372	At4g15480.1	68417.m02366 UDP-glucoronosyl/UDP-glucosyl transferase family protein contains Pfam profile: PF00201 UDP-glucoronosyl and UDP-glucosyl transferase	1.4e-131	1.4e-131	-8.42381	-8.62466	8.5276	13.2054	-4.18878	-35.4003	0.489804	28.1112	-16.3769	10.2713	-2.69462	-11.0676	0
																					TC18421	similar to UP|O82046_RIBNI (O82046) Metallothionein-like protein, partial (92%)	NA	At3g15353.1	68416.m01944 metallothionein protein, putative	8.9e-17	8.9e-17	-3.68472	-10.1754	3.3723	13.2733	-0.554145	-15.2249	-0.584375	11.2548	-12.2048	8.22812	-0.894906	-2.91463	0
																					TC18571	similar to UP|Q6PTC5_CITSI (Q6PTC5) Anthocyanidin synthase, partial (95%)	GO:0010023;GO:0045432;GO:0007033;GO:0008372	At4g22880.1	68417.m03304 leucoanthocyanidin dioxygenase, putative / anthocyanidin synthase, putative similar to SP|P51091 [Malus domestica]; contains PF03171 2OG-Fe(II) oxygenase superfamily	1.7e-146	1.7e-146	-11.2416	-7.68107	9.26445	13.3946	-1.10475	-32.2161	-1.72699	26.6837	-20.1577	7.51981	-1.65941	-10.0073	0
																					TC16209	weakly similar to UP|Q9AXL6_MUSAC (Q9AXL6) Beta-glucosidase (Fragment), partial (40%)	NA	At1g02850.3	68414.m00249 glycosyl hydrolase family 1 protein contains Pfam PF00232 : Glycosyl hydrolase family 1 domain; TIGRFAM TIGR01233: 6-phospho-beta-galactosidase; similar to hydroxyisourate hydrolase (GI:19569603-TRUNCATED-	1.7e-135	1.7e-135	-10.4884	-8.19096	8.95694	13.4684	-1.4057	-29.8589	-0.35956	33.7618	-24.2953	9.49189	-1.659	-8.31623	0
																					TC18978	weakly similar to UP|NPH3_ORYSA (Q5KS50) Coleoptile phototropism protein 1 (Non-phototropic hypocotyl 3-like protein) (NPH3-like protein), partial (15%)	NA	At5g10250.1	68418.m01190 phototropic-responsive protein, putative similar to root phototropism RPT2 [Arabidopsis thaliana] gi|6959488|gb|AAF33112, a signal transducer of phototropic response PMID:10662859	5.9e-55	5.9e-55	-7.13108	-9.66178	7.23636	13.5206	-1.01691	-22.5235	-0.500367	20.2696	-19.0141	8.16581	-1.319	-6.7846	0
																					TC9816	weakly similar to UP|Q69FA1_PHAVU (Q69FA1) Anthocyanin acyltransferase, partial (19%)	NA	At1g03940.1	68414.m00379 transferase family protein similar to anthocyanin 5-aromatic acyltransferase from Gentiana triflora GI:4185599, malonyl CoA:anthocyanin 5-O-glucoside-6'''-O-malonyltransferase from Perilla frute-TRUNCATED-	4.2e-70	4.2e-70	-13.5365	-6.40613	9.31291	13.5345	-2.89421	-33.5047	-1.42656	33.7341	-20.785	6.74952	-3.82715	-12.5834	0
																					TC11639	weakly similar to UP|Q8GSN8_9ASTR (Q8GSN8) Malonyl CoA:anthocyanin 3-O-glucoside-6''-O-malonyltransferase, partial (17%)	NA	At1g03940.1	68414.m00379 transferase family protein similar to anthocyanin 5-aromatic acyltransferase from Gentiana triflora GI:4185599, malonyl CoA:anthocyanin 5-O-glucoside-6'''-O-malonyltransferase from Perilla frute-TRUNCATED-	2.6e-68	2.6e-68	-7.22417	-6.89353	8.09101	13.6373	-4.77756	-21.1352	0.610606	34.4422	-14.2177	10.7082	-3.62157	-10.9082	0
																					TC14446	weakly similar to UP|Q5UL10_FRAAN (Q5UL10) Flavonoid 3-O-glucosyltransferase, partial (69%)	GO:0016757;GO:0008194	At5g17050.1	68418.m01998 UDP-glucoronosyl/UDP-glucosyl transferase family protein similar to UDP glucose:flavonoid 3-o-glucosyltransferase, Vitis vinifera, EMBL:AF000372	1.7e-128	1.7e-128	-3.30399	-11.2799	8.66698	13.6615	-5.92379	-25.9962	3.51421	26.0074	-9.77047	15.6552	-1.30366	-7.79773	0
																					TC8207	similar to UP|Q8VYW9_CUCME (Q8VYW9) Aminotransferase 1, complete	GO:0005777;GO:0009853;GO:0008453	At2g13360.1	68415.m01474 serine-glyoxylate aminotransferase-related similar to serine-glyoxylate aminotransferase (GI:21535798)[Methylobacterium dichloromethanicum; contains TIGRFAM TIGR01364: phosphoserine aminotransf-TRUNCATED-	7.1e-194	7.1e-194	-5.33595	-4.46712	4.22681	14.5348	-7.94326	-25.3182	0.553074	17.4099	-7.14474	11.2245	-4.29963	-10.1154	0
																					TC9514	similar to UP|Q93XV7_9ROSI (Q93XV7) Hydroxypyruvate reductase , complete	GO:0005777;GO:0009853	At1g68010.1	68414.m07769 glycerate dehydrogenase / NADH-dependent hydroxypyruvate reductase identical to hydroxypyruvate reductase (HPR) GB:D85339 [Arabidopsis thaliana] (Plant Cell Physiol 1997 Apr;38(4):449-55) -TRUNCATED-	3.1e-184	3.1e-184	-8.56947	-3.40071	2.35905	15.3664	-2.13543	-15.4563	-4.04123	14.368	-10.527	4.30352	-4.35182	-7.34041	0
																					TC16191	similar to PIR|T48901|T48901 sulfate transporter ATST1 [imported] {Arabidopsis thaliana}, partial (95%)	GO:0015116;GO:0008272	At3g51895.1	68416.m05692 sulfate transporter (ST1) identical to sulfate transporter [Arabidopsis thaliana] GI:2285885	6.8e-260	6.8e-260	-1.76929	-9.91511	4.78809	15.6708	-7.39467	-20.9497	2.7676	7.44697	-10.0139	13.862	-2.40777	-4.3342	0

## Sheet: PET
Genes up-regulated in PETals (all: 90, highest absolute D stat: 59)
SEQ_ID	Annotation	GO	db.match.accession	db.match.header	E.value	P.value	STA	CAR	PET	SEP	STD	STA+STD+CAR	PET+STA	SEP+PET	STA+CAR	SEP+PET+STA	PET+STA+STD	STA+STD	d stat test
TC8054	similar to UP|Q5VLJ5_HEVBR (Q5VLJ5) 1-aminocyclopropane-1-carboxylate oxidase, complete	GO:0009693;GO:0009815;GO:0009727;GO:0008372	At1g05010.1	68414.m00502 1-aminocyclopropane-1-carboxylate oxidase / ACC oxidase / ethylene-forming enzyme (ACO) (EAT1) Identical to 1-aminocyclopropane-1-carboxylate oxidase (ACC oxidase) gb|X66719 (EAT1). ESTs gb|T430-TRUNCATED-	1.6e-132	1.6e-132	-2.53999	-9.05101	28.1648	-1.17491	-1.86664	-12.6575	11.0349	12.742	-10.3346	7.49745	6.42862	-3.43507	28.1648
TC18601	similar to UP|Q8H0Z6_ARATH (Q8H0Z6) At1g71710/F14O23_9, partial (44%)	NA	At1g71710.1	68414.m08289 inositol polyphosphate 5-phosphatase, putative similar to inositol polyphosphate 5-phosphatase I [Arabidopsis thaliana] GI:10444261	4.8e-124	4.8e-124	-5.58333	-2.97338	27.1168	-2.14139	-1.89004	-12.1383	7.05731	10.6351	-8.17649	4.21686	4.89372	-5.39881	27.1168
DR919899	weakly similar to UP|UFOG2_MANES (Q40285) Flavonol 3-O-glucosyltransferase 2 (UDP-glucose flavonoid 3-O-glucosyltransferase 2) (Fragment) , partial (20%)	NA	At4g15280.1	68417.m02340 UDP-glucoronosyl/UDP-glucosyl transferase family protein contains Pfam profile: PF00201 UDP-glucoronosyl and UDP-glucosyl transferase	2.5e-33	2.5e-33	-5.82697	-1.10199	25.3514	-3.01459	-2.5015	-8.30193	5.97194	7.56576	-5.58457	2.85361	3.67986	-6.66367	25.3514
TC13336	weakly similar to UP|Q8GUE4_9MAGN (Q8GUE4) Geraniol synthase, partial (28%)	NA	At3g25810.1	68416.m03213 myrcene/ocimene synthase, putative similar to GI:9957293; contains Pfam profile: PF01397 terpene synthase family	2.9e-62	2.9e-62	-3.47589	-6.61028	23.3476	0.47815	-2.21758	-13.0052	7.33905	14.5969	-9.5173	7.87527	4.363	-3.95367	23.3476
TC17544	NA	NA	At2g28670.1	68415.m03485 disease resistance-responsive family protein / fibroin-related contains similarity to silk fibroin heavy chain [Bombyx mori] gi|765323|gb|AAB31861; contains disease resistance response protien d-TRUNCATED-	1e-88	1e-88	-3.26801	-2.54757	22.9613	-2.8106	-3.29035	-5.48409	7.24699	7.98078	-4.53087	5.17964	4.6232	-5.20835	22.9613
TC17564	similar to UP|Q38696_ACTDE (Q38696) Xyloglucan endotransglycosylase precursor, partial (91%)	GO:0016798;GO:0005737;GO:0007568;GO:0005618;GO:0012505	At5g13870.1	68418.m01621 xyloglucan:xyloglucosyl transferase / xyloglucan endotransglycosylase / endo-xyloglucan transferase (EXGT-A4) identical to endoxyloglucan transferase EXGT-A4 GI:5533315 from [Arabidopsis thalian-TRUNCATED-	3.5e-121	3.5e-121	-2.7471	-4.96919	20.988	-5.95387	0.76148	-5.3553	8.32358	5.54339	-6.41212	2.23696	5.40949	-1.38871	20.988
TC16922	similar to PRF|NP_566411.2|30682045|NP_566411 senescence-associated family protein {Arabidopsis thaliana}, partial (93%)	GO:0007568;GO:0005554	At3g12090.1	68416.m01505 senescence-associated family protein similar to senescence-associated protein 5 [Hemerocallis hybrid cultivar] gi|3551954|gb|AAC34855	1.2e-111	1.2e-111	-0.211783	-4.38434	20.8886	-6.44471	-1.10506	-4.30259	12.5413	4.78727	-2.60071	4.59311	9.79726	-0.921889	20.8886
TC10429	similar to UP|Q9LLM5_EUCCA (Q9LLM5) Outward-rectifying potassium channel KCO1, partial (84%)	GO:0005774;GO:0015269;GO:0015271	At5g55630.1	68418.m06936 outward rectifying potassium channel (KCO1) identical to kco1 [Arabidopsis thaliana] gi|2230761|emb|CAA69158 of the 2 pore, 4 transmembrane (2P/4TM) K+ channel family, PMID:11500563	2.1e-98	2.1e-98	-4.44984	-3.37579	20.7191	-4.24812	-0.36916	-7.80257	3.81399	6.05352	-7.36911	2.92069	6.13444	-4.06007	20.7191
TC18703	similar to PRF|NP_188448.1|15229596|NP_188448 nodulin MtN21 family protein {Arabidopsis thaliana}, partial (19%)	NA	At1g68170.1	68414.m07787 nodulin MtN21 family protein similar to MtN21 GI:2598575 (root nodule development) from [Medicago truncatula]	5.4e-77	5.4e-77	-2.01292	-3.45394	20.71	-2.09782	-3.10586	-8.05141	9.01051	9.3611	-6.14386	7.40426	6.14432	-4.20037	20.71
TC19316	weakly similar to UP|Q7XAS7_POPTM (Q7XAS7) Isoprene synthase, partial (17%)	NA	At2g24210.1	68415.m02892 myrcene/ocimene synthase (TPS10) nearly identical to GI:9957293; contains Pfam profile: PF01397 terpene synthase family	8.5e-39	8.5e-39	-3.78725	-5.41442	20.0646	-0.427791	-2.15771	-10.5815	4.20957	11.2296	-8.24815	3.21183	2.73316	-3.87021	20.0646
TC9412	weakly similar to PRF|NP_565014.1|18409781|NP_565014 6-phosphogluconate dehydrogenase NAD-binding domain-containing protein {Arabidopsis thaliana}, partial (85%)	GO:0006098;GO:0004616;GO:0008372	At1g71180.1	68414.m08213 6-phosphogluconate dehydrogenase NAD-binding domain-containing protein similar to SP|P23523 2-hydroxy-3-oxopropionate reductase (EC 1.1.1.60) (Tartronate semialdehyde reductase) {Escherichia col-TRUNCATED-	3.8e-92	3.8e-92	-2.23952	-1.45967	19.7211	-5.27692	-4.80402	-7.22145	10.5067	7.24775	-2.96577	4.53601	4.28508	-5.417	19.7211
TC19085	UP|Q84Y74_AQUAL (Q84Y74) AP3-3 (Fragment), complete	GO:0003677	At3g54340.1	68416.m06005 floral homeotic protein APETALA3 (AP3)	3.3e-54	3.3e-54	1.21234	-5.08909	19.6829	-4.49876	-3.02292	-6.61645	13.3489	5.9869	-3.3915	7.41828	9.2628	-1.28955	19.6829
TC8201	weakly similar to UP|Q9FJ41_ARATH (Q9FJ41) GDSL-motif lipase/hydrolase-like protein, partial (34%)	NA	At5g45950.1	68418.m05650 GDSL-motif lipase/hydrolase family protein similar to family II lipase EXL3 (GI:15054386) and EXL1 (GI:15054382) [Arabidopsis thaliana], anther-specific proline-rich protein APG [Arabidopsis tha-TRUNCATED-	1e-89	1e-89	1.66933	-1.79214	18.1463	-9.39645	-1.67931	-1.63085	14.3554	1.74791	-0.339597	3.29073	11.6854	0.0493128	18.1463
DT768829	weakly similar to UP|GGH_ARATH (O65355) Gamma-glutamyl hydrolase precursor (Gamma-Glu-X carboxypeptidase) (Conjugase) (GH) , partial (52%)	NA	At1g78680.1	68414.m09171 gamma-glutamyl hydrolase (GGH1) / gamma-Glu-X carboxypeptidase / conjugase identical to SP|O65355 Gamma-glutamyl hydrolase precursor (EC 3.4.19.9) (Gamma-Glu-X carboxypeptidase) (Conjugase) (GH)-TRUNCATED-	2.8e-73	2.8e-73	-1.09432	-3.1454	17.82	-1.78234	-2.61975	-6.89555	6.80046	6.25883	-4.22972	5.19659	4.13813	-3.02089	17.82
TC15142	similar to PRF|NP_568717.2|30695795|NP_568717 pyridoxamine 5'-phosphate oxidase-related {Arabidopsis thaliana}, partial (86%)	GO:0004733;GO:0008615;GO:0005554	At5g49970.1	68418.m06188 pyridoxamine 5'-phosphate oxidase-related contains weak similarity to Pyridoxamine 5'-phosphate oxidase (EC 1.4.3.5) (PNP/PMP oxidase) (PNPOx). (Swiss-Prot:P28225) [Shigella flexneri]	7.4e-199	7.4e-199	-5.00241	-5.99686	17.1212	-0.020738	-1.02886	-12.0442	5.72197	9.67876	-8.37266	5.30838	4.24637	-4.63424	17.1212
TC12861	homologue to UP|Q75G58_ORYSA (Q75G58) Expressed protein, partial (11%)	NA	At4g18670.1	68417.m02762 leucine-rich repeat family protein / extensin family protein similar to extensin-like protein [Lycopersicon esculentum] gi|5917664|gb|AAD55979; contains leucine-rich repeats, Pfam:PF00560; conta-TRUNCATED-	1.9e-10	1.9e-10	-4.80275	-8.70757	17.1028	1.60562	-1.53086	-15.9965	5.97687	15.074	-12.1607	7.75622	3.51596	-4.4648	17.1028
TC13988	similar to PRF|NP_200534.1|15242072|NP_200534 oxysterol-binding family protein {Arabidopsis thaliana}, partial (39%)	NA	At5g57240.1	68418.m07151 oxysterol-binding family protein low similarity to SP|P22059 Oxysterol-binding protein 1 {Homo sapiens}; contains Pfam profile PF01237: Oxysterol-binding protein	3.7e-78	3.7e-78	-2.94569	-5.36221	17.0371	-4.25926	2.08253	-5.60455	7.1068	4.53881	-7.51672	2.72178	9.64896	-0.62825	17.0371
TC19255	weakly similar to PRF|NP_201445.1|15239971|NP_201445 expressed protein {Arabidopsis thaliana}, partial (23%)	NA	At5g66440.1	68418.m08379 expressed protein	1.9e-33	1.9e-33	0.033146	-6.01099	16.9159	-2.63507	-2.43058	-7.29979	8.85958	6.01035	-3.96211	5.8053	5.72615	-2.39212	16.9159
TC12584	similar to GB|AAG17825.1|10444263|AF289634 inositol polyphosphate 5-phosphatase II {Arabidopsis thaliana}, partial (22%)	NA	At4g18010.1	68417.m02679 inositol polyphosphate 5-phosphatase II (IP5PII) nearly identical to inositol polyphosphate 5-phosphatase II [Arabidopsis thaliana] GI:10444263 isoform contains an AT-acceptor splice site at int-TRUNCATED-	6.8e-54	6.8e-54	-2.30397	-2.0324	16.5727	-3.68977	-2.03638	-6.08975	7.28722	4.58965	-3.81112	4.16198	4.80631	-3.59747	16.5727
TC16993	homologue to UP|O23054_ARATH (O23054) YUP8H12.26 protein, partial (6%)	NA	At2g22795.1	68415.m02704 expressed protein	4.6e-08	4.6e-08	1.40331	-4.29253	16.3076	-2.95348	-5.77319	-8.04121	11.9132	5.02192	-2.32894	7.85126	5.55813	-2.47267	16.3076
TC13195	weakly similar to UP|Q9M662_TOBAC (Q9M662) Cell death associated protein, partial (89%)	NA	At1g68620.1	68414.m07841 expressed protein similar to PrMC3 [Pinus radiata] GI:5487873	5.4e-45	5.4e-45	-2.93882	-3.05651	15.1011	-4.28401	0.307114	-5.2558	6.35068	5.60146	-5.48547	2.03268	7.25821	-2.16031	15.1011
TC14017	NA	NA	At5g12380.1	68418.m01456 annexin, putative similar to annexin [Fragaria x ananassa] GI:6010777, annexin p33 [Zea mays] GI:6272285; contains Pfam profile PF00191: Annexin	1.1e-32	1.1e-32	-3.08464	0.482672	14.6795	-6.16108	-2.43728	-3.96624	6.08363	4.00531	-1.78625	0.922066	4.09191	-4.2978	14.6795
TC16732	similar to PIR|T51939|T51939 homocysteine S-methyltransferase AtHMT-2 [imported] {Arabidopsis thaliana} , partial (95%)	GO:0008898;GO:0000004;GO:0008372;GO:0012505	At3g63250.1	68416.m07107 homocysteine S-methyltransferase 2 (HMT-2) 99.7% identical to homocysteine S-methyltransferase AtHMT-2 (GI:6685163) [Arabidopsis thaliana]	1.7e-137	1.7e-137	-4.17849	-0.63781	14.5761	-1.82123	-4.24081	-8.39915	5.36523	2.73593	-1.2564	4.16322	1.69912	-6.74446	14.5761
TC13806	weakly similar to UP|Q7PZX2_ANOGA (Q7PZX2) ENSANGP00000014102 (Fragment), partial (6%)	NA	At5g15780.1	68418.m01845 pollen Ole e 1 allergen and extensin family protein contains Pfam profile PF01190: Pollen proteins Ole e I family	2e-05	2e-05	-3.4781	-6.24747	14.5709	0.027343	-1.2985	-9.51028	5.44497	11.2205	-7.51131	6.12159	4.66715	-4.2549	14.5709
DR951715	NA	NA	At1g73370.1	68414.m08492 sucrose synthase, putative / sucrose-UDP glucosyltransferase, putative similar to sucrose synthase GI:6682841 from [Citrus unshiu]	6e-94	6e-94	-3.73157	1.52938	14.2251	-4.2113	-4.1112	-4.65158	4.93626	3.84965	-1.46511	1.77453	1.51302	-5.71581	14.2251
TC19981	similar to UP|Q501A0_ARATH (Q501A0) At5g37660, partial (66%)	GO:0005554	At5g37660.1	68418.m04535 receptor-like protein kinase-related similar to receptor-like protein kinase 4 (GI:13506745) {Arabidopsis thaliana}; embryonic abundant protein EMB24, white spruce, PIR:T09251; contains Pfam PF0-TRUNCATED-	1.1e-76	1.1e-76	-4.40833	0.919977	14.199	-7.40621	-0.158896	-2.45955	4.79404	2.25295	-2.16218	-0.65696	3.36391	-3.21686	14.199
TC19670	similar to PRF|NP_974698.1|42573203|NP_974698 expressed protein {Arabidopsis thaliana}, partial (35%)	NA	At5g42690.1	68418.m05200 expressed protein contains Pfam profile PF04784: Protein of unknown function, DUF547; expression supported by MPSS	1.1e-106	1.1e-106	-2.0225	2.43977	14.1962	-4.38046	-6.34613	-4.37189	5.53459	3.19778	0.191734	2.45384	1.56992	-6.48759	14.1962
TC16802	similar to UP|HEX6_RICCO (Q07423) Hexose carrier protein HEX6, partial (94%)	GO:0005351;GO:0015144;GO:0016020	At5g61520.1	68418.m07719 hexose transporter, putative similar to hexose carrier protein hex6 {Ricinus communis} SP|Q07423; contains Pfam profile PF00083: major facilitator superfamily protein	7.9e-163	7.9e-163	1.24855	-5.19674	14.1708	-0.490181	-1.90253	-3.51466	11.1707	6.02516	-5.22948	8.83542	6.61659	-0.753123	14.1708
TC14309	weakly similar to UP|Q6VAB3_STERE (Q6VAB3) UDP-glycosyltransferase 85A8, partial (48%)	NA	At1g22360.1	68414.m02797 UDP-glucoronosyl/UDP-glucosyl transferase family protein contains Pfam profile: PF00201 UDP-glucoronosyl and UDP-glucosyl transferase	2.3e-133	2.3e-133	-4.50627	1.54497	13.8785	-1.33833	-3.67418	-6.64452	3.33929	7.28973	-2.45706	2.58997	-0.406536	-10.4984	13.8785
TC19512	weakly similar to UP|Q5C9I9_MENPI (Q5C9I9) (-)-isopiperitenol dehydrogenase, partial (56%)	NA	At2g47140.1	68415.m05887 short-chain dehydrogenase/reductase (SDR) family protein similar to 3-beta-hydroxysteroiddehydrogenase GI:15983819 from [Digitalis lanata]	3e-67	3e-67	-2.68984	-0.0414054	13.7621	-1.63585	-4.87843	-6.14865	6.01631	7.67635	-2.28449	2.91108	1.24218	-6.42132	13.7621
TC19991	weakly similar to UP|PER52_ARATH (Q9FLC0) Peroxidase 52 precursor (Atperox P52) (ATP49) , partial (57%)	GO:0004601;GO:0008372	At5g05340.1	68418.m00575 peroxidase, putative similar to peroxidase [Nicotiana tabacum] gi|5381253|dbj|BAA82306; similar to Peroxidase P7 [Brassica rapa (Turnip)] SWISS-PROT:P00434	2.1e-66	2.1e-66	-2.06428	-5.62179	13.6231	-1.89994	-1.08647	-7.09831	5.51253	6.1553	-5.52226	5.05771	5.56241	-2.46259	13.6231
TC15187	weakly similar to PRF|NP_568038.1|18420207|NP_568038 expressed protein {Arabidopsis thaliana}, partial (44%)	NA	At4g38260.1	68417.m05404 expressed protein contains Pfam PF05742: Protein of unknown function (DUF833)	1.1e-78	1.1e-78	3.18694	-7.05759	13.3859	-2.48279	-4.38484	-5.0079	9.36127	3.01651	-2.56665	9.15963	6.77691	-0.614707	13.3859
TC9445	similar to PRF|NP_198121.1|15241025|NP_198121 heavy-metal-associated domain-containing protein {Arabidopsis thaliana}, partial (20%)	NA	At1g56210.1	68414.m06460 copper chaperone (CCH)-related low similarity to copper homeostasis factor [GI:3168840][PMID:9701579] and farnesylated proteins ATFP3 [GI:4097547] and GMFP7 [Glycine max][GI:4097573]; contains P-TRUNCATED-	2.1e-43	2.1e-43	-7.58465	1.91064	13.0963	-6.38421	1.81719	-3.31004	2.56661	2.82789	-4.8113	-2.96082	4.15107	-4.87537	13.0963
TC16890	similar to UP|Q9MAN1_ARATH (Q9MAN1) T25K16.3, partial (35%)	GO:0003700	At1g01030.1	68414.m00003 DNA-binding protein, putative similar to DNA-binding proteins from [Arabidopsis thaliana] RAV1 GI:3868857, RAV2 GI:3868859; contains Pfam profile PF02362: B3 DNA binding domain	2.1e-52	2.1e-52	1.00719	-2.88975	13.0687	1.01532	-12.7697	-9.50261	8.20202	9.32304	-1.19628	9.89621	0.909216	-7.21802	13.0687
TC19163	similar to UP|Q5D6H2_GOSHI (Q5D6H2) CNGC2, partial (28%)	NA	At5g15410.1	68418.m01804 cyclic nucleotide-regulated ion channel / cyclic nucleotide-gated channel (CNGC2) identical to cyclic nucleotide-gated cation channel GI:3894399 from [Arabidopsis thaliana]	1.2e-69	1.2e-69	-2.00067	-4.72723	12.7875	0.198147	-1.61062	-7.25399	4.06152	8.6578	-5.54424	4.98719	1.8908	-2.84885	12.7875
TC16775	similar to PRF|NP_186848.1|15232835|NP_186848 ACT domain-containing protein (ACR6) {Arabidopsis thaliana}, partial (74%)	GO:0006521;GO:0009735;GO:0005829;GO:0008372	At3g01990.1	68416.m00158 ACT domain-containing protein (ACR6) contains Pfam ACT domain PF01842; similar to uridylyl transferase-like proteins GB:AAD20075, GB:AAC00631 [Arabidopsis thaliana]	5.9e-151	5.9e-151	-3.89776	-6.53575	12.7594	3.21545	-2.6855	-7.19444	3.2782	9.17315	-9.55937	9.4247	2.70161	-5.44627	12.7594
DR941490	homologue to PIR|T01259|T01259 AMP deaminase homolog F16M14.21 {Arabidopsis thaliana}, partial (46%)	NA	At2g38280.1	68415.m04701 AMP deaminase, putative / myoadenylate deaminase, putative similar to SP|P15274 AMP deaminase (EC 3.5.4.6) (Myoadenylate deaminase) {Saccharomyces cerevisiae}; contains Pfam profile PF00962: Ade-TRUNCATED-	1.6e-145	1.6e-145	-6.60605	-0.291037	12.4408	-1.4695	-0.572882	-3.04199	1.94511	5.05086	-4.65517	0.54786	1.42658	-3.80996	12.4408
TC10167	weakly similar to UP|P93378_TOBAC (P93378) Tumor-related protein, partial (54%)	NA	At1g17860.1	68414.m02210 trypsin and protease inhibitor family protein / Kunitz family protein similar to LeMir (miraculin homolog) GI:2654440 from [Lycopersicon esculentum], tumor-related protein [Nicotiana tabacum] GI-TRUNCATED-	1.3e-43	1.3e-43	-0.121644	-5.86993	12.2593	0.8945	-6.95564	-12.0752	9.50019	10.7801	-4.27964	8.33263	3.40353	-3.89284	12.2593
DT758993	similar to UP|Q5ZC21_ORYSA (Q5ZC21) Esterase/lipase/thioesterase-like protein, partial (30%)	NA	At1g54570.1	68414.m06223 esterase/lipase/thioesterase family protein contains Interpro entry IPR000379	2.5e-77	2.5e-77	-1.34026	-9.18394	12.0746	2.53309	-2.10809	-6.05322	4.16756	6.5581	-7.74923	7.54178	3.97344	-2.19114	12.0746
TC8863	similar to UP|ASO_TOBAC (Q40588) L-ascorbate oxidase precursor (Ascorbase) (ASO) , partial (92%)	GO:0005507;GO:0008447	At5g21105.1	68418.m02515 L-ascorbate oxidase, putative similar to L-ascorbate oxidase from {Nicotiana tabacum} SP|Q40588, {Cucurbita pepo var. melopepo} SP|P37064; contains Pfam profile PF00394: Multicopper oxidase; sup-TRUNCATED-	1e-208	1e-208	-2.88519	0.316437	11.986	-0.161997	-5.46721	-6.34584	3.23807	6.42179	-2.4883	3.9859	-0.118703	-7.20641	11.986
TC8135	similar to UP|Q9LHS3_ARATH (Q9LHS3) Arabidopsis thaliana genomic DNA, chromosome 5, TAC clone:K16F4, partial (73%)	GO:0005554	At5g06130.2	68418.m00682 chaperone protein dnaJ-related similar to unknown protein (pir||T00468); contains Pfam PF00684 : DnaJ central domain (4 repeats)	1.3e-105	1.3e-105	-2.52675	0.132539	11.8231	0.485289	-7.30249	-8.8573	3.99386	8.37443	-2.24621	4.98447	-0.804006	-8.97985	11.8231
TC18697	NA	NA	At2g28260.1	68415.m03430 cyclic nucleotide-regulated ion channel, putative (CNGC15) similar to cyclic nucleotide and calmodulin-regulated ion channel (cngc6) GI:4581207 from [Arabidopsis thaliana]	3.2e-158	3.2e-158	-3.52372	-2.30627	11.7959	-4.97588	2.28147	-2.26049	4.19806	3.00865	-5.19971	0.245438	5.54413	-1.15349	11.7959
TC13728	weakly similar to UP|GL116_ARATH (Q9FIC8) Germin-like protein subfamily 1 member 16 precursor, partial (86%)	GO:0000004;GO:0031012;GO:0005554	At3g05950.1	68416.m00678 germin-like protein, putative similar to germin-like protein GLP6 [SP|P92997]; contains Pfam profile: PF01072 germin family	1.9e-65	1.9e-65	-2.74579	-5.02359	11.7861	-0.37645	-2.0793	-9.04724	5.34408	8.98043	-6.89188	4.58803	3.70769	-3.54368	11.7861
DR951714	NA	NA	At3g49860.1	68416.m05451 ADP-ribosylation factor, putative similar to GTP-binding ADP-ribosylation factor homolog 1 protein (SP:P25160) [Drosophila melanogaster] and various ADP-RIBOSYLATION FACTOR (ARF) - like proteins-TRUNCATED-	7.1	0.9992	-1.63505	0.321217	11.6351	-2.8147	-2.17617	-2.6542	3.95427	2.89488	-1.01101	1.36442	1.66074	-3.06497	11.6351
TC8292	similar to UP|Q7Y030_ARATH (Q7Y030) At4g24530, partial (91%)	GO:0000004;GO:0005554;GO:0008372	At4g24530.1	68417.m03516 expressed protein contains Pfam PF03138: Plant protein family. The function of this family of plant proteins is unknown; previously annotated as 'PsRT17-1 like protein' based on similarity to P-TRUNCATED-	9.3e-208	9.3e-208	-2.02089	-3.69443	11.5343	-5.18633	1.45771	-1.51899	4.57719	3.63153	-5.23375	1.83851	7.63621	0.177131	11.5343
TC10077	similar to UP|Q9LIK0_ARATH (Q9LIK0) Pyruvate kinase (AT3g22960/F5N5_15), partial (59%)	GO:0004743;GO:0006096	At3g22960.1	68416.m02895 pyruvate kinase, putative similar to pyruvate kinase isozyme A, chloroplast precursor [Ricinus communis] SWISS-PROT:Q43117	2.8e-151	2.8e-151	-4.84167	0.478329	11.3413	-3.62985	-1.77728	-5.28406	4.0075	3.78283	-2.73415	1.1591	3.07678	-3.43957	11.3413
TC10757	NA	NA	At3g02100.1	68416.m00176 UDP-glucoronosyl/UDP-glucosyl transferase family protein contains Pfam profile: PF00201 UDP-glucoronosyl and UDP-glucosyl transferase	4.2e-109	4.2e-109	0.000313591	-3.12992	11.3222	2.05793	-7.58487	-10.059	8.2329	8.72311	-2.90663	9.07701	0.871146	-5.5004	11.3222
DR913382	similar to UP|Q9FFF6_ARATH (Q9FFF6) Leucoanthocyanidin dioxygenase-like protein (AT5g05600/MOP10_14), partial (64%)	NA	At5g05600.1	68418.m00609 oxidoreductase, 2OG-Fe(II) oxygenase family protein similar to flavonol synthase [Citrus unshiu][gi:4126403], leucoanthocyanidin dioxygenase [Daucus carota][gi:5924383]; contains PF03171 2OG-Fe(-TRUNCATED-	3.7e-101	3.7e-101	-1.70061	-3.57578	11.3039	1.87151	-4.60193	-9.33275	4.98441	4.84877	-2.31426	4.99377	1.21884	-4.66156	11.3039
TC10720	similar to UP|Q8S4R4_LYCES (Q8S4R4) Carotenoid isomerase, partial (56%)	GO:0046608;GO:0016117	At1g06820.1	68414.m00727 carotenoid isomerase, putative similar to carotenoid isomerase from Lycopersicon esculentum [gi:19550437]; contains Pfam profile: PF02032 Phytoene dehydrogenase related enzyme	3.1e-161	3.1e-161	-0.080967	-6.95172	11.1879	-0.418913	-4.06321	-8.79128	7.70895	8.64835	-4.15837	8.56189	5.2454	-3.13925	11.1879
TC16509	NA	NA	At5g38560.1	68418.m04662 protein kinase family protein contains protein kinase domain, Pfam:PF00069	7.4e-20	7.4e-20	-8.0063	3.94194	11.1013	-1.71865	-2.8848	-3.30539	1.30245	4.46164	-2.15521	-0.17058	-1.91045	-6.27497	11.1013
TC15442	weakly similar to UP|Q6VMW0_MENPI (Q6VMW0) Flavonoid 8-O-methyltransferase, partial (67%)	NA	At4g35160.1	68417.m04998 O-methyltransferase family 2 protein similar to caffeic acid O-methyltransferase, Pinus taeda, gb:U39301	3.9e-58	3.9e-58	-4.34883	-5.82632	11.0295	-1.6593	1.05814	-7.12755	2.45765	6.6985	-8.68014	3.69693	6.78104	-2.6009	11.0295
TC14505	weakly similar to UP|Q94CE3_ARATH (Q94CE3) Carbonate dehydratase-like protein, partial (65%)	GO:0008270;GO:0015976;GO:0004089	At4g33580.1	68417.m04771 carbonic anhydrase family protein / carbonate dehydratase family protein similar to SP|P46512 Carbonic anhydrase 1 (EC 4.2.1.1) (Carbonate dehydratase 1) {Flaveria linearis}; contains Pfam profi-TRUNCATED-	8.9e-84	8.9e-84	-2.09718	0.0338645	10.9981	-0.187606	-6.85845	-7.34958	4.42465	6.59171	-1.55714	4.72937	0.239715	-3.56327	10.9981
TC16183	similar to PRF|NP_194701.1|15233671|NP_194701 amine oxidase family protein {Arabidopsis thaliana}, partial (68%)	GO:0008131;GO:0006118	At4g29720.1	68417.m04232 amine oxidase family protein similar to polyamine oxidase isoform-2 [Homo sapiens] GI:16554963; contains Pfam profile PF01593: amine oxidase, flavin-containing	2.4e-121	2.4e-121	-0.601446	4.27618	10.9124	-9.23976	-6.96547	-1.45141	4.48427	2.02524	3.08877	1.3462	1.27843	-5.82039	10.9124
DT730624	similar to PRF|NP_180382.2|30683784|NP_180382 expressed protein {Arabidopsis thaliana}, partial (21%)	NA	At2g28150.1	68415.m03419 expressed protein	8.3e-49	8.3e-49	-3.06666	2.37384	10.835	-7.17624	-2.36454	-2.2822	4.73718	1.77348	-0.368394	-0.0828463	3.02793	-3.57206	10.835
TC12015	weakly similar to PRF|NP_180725.1|15225120|NP_180725 expressed protein {Arabidopsis thaliana}, partial (62%)	GO:0000004;GO:0005554;GO:0008372	At2g31670.1	68415.m03866 expressed protein similar to NADH-ubiquinone oxidoreductase B16.6 subunit (EC 1.6.5.3) (EC 1.6.99.3) (Complex I-B16.6) (CI-B16.6) (Gene associated with retinoic-interferon-induced mortality 19 p-TRUNCATED-	1.6e-63	1.6e-63	-3.07015	-3.49233	10.8097	1.15541	-3.26487	-8.53607	3.1852	7.03362	-3.5728	5.02683	1.7059	-4.19472	10.8097
TC17463	similar to UP|Q8W4S5_ARATH (Q8W4S5) AT5g63710/MBK5_19, partial (74%)	GO:0004672;GO:0005524;GO:0004674;GO:0007169;GO:0004675;GO:0006468;GO:0012505;GO:0008372	At5g63710.1	68418.m07997 leucine-rich repeat transmembrane protein kinase, putative	1.8e-213	1.8e-213	-2.67955	-1.77133	10.7789	0.858403	-2.22238	-5.79639	3.16077	8.26934	-4.60679	3.85593	2.08892	-3.03093	10.7789
TC9184	NA	NA	At3g01750.1	68416.m00112 ankyrin repeat family protein contains ankyrin repeats, Pfam:PF00023	1.2e-05	1.2e-05	-0.206334	0.0192282	10.7567	-6.33115	-1.5867	-1.3964	5.50579	1.5117	-0.126884	1.29952	4.97844	-1.54799	10.7567
DT735982	NA	NA	NA	NA	NA	NA	-2.1004	-5.88901	10.6059	-2.5398	2.02588	-2.43042	3.39134	2.95234	-5.00674	1.70725	3.87374	-0.0717502	10.6059
TC19572	similar to PRF|NP_201445.1|15239971|NP_201445 expressed protein {Arabidopsis thaliana}, partial (13%)	NA	At5g66440.1	68418.m08379 expressed protein	4.2e-38	4.2e-38	1.27151	-5.65444	10.5615	-1.41956	-1.70955	-4.28759	7.07189	5.13017	-3.04946	5.8489	5.64432	-0.466376	10.5615
TC10719	similar to UP|Q53MQ4_ORYSA (Q53MQ4) Transmembrane amino acid transporter protein, partial (73%)	GO:0015359;GO:0006865;GO:0016020	At5g16740.1	68418.m01960 amino acid transporter family protein low similarity to lysosomal amino acid transporter 1 [Rattus norvegicus] GI:14571904; belongs to INTERPRO:IPR002422 amino acid/polyamine transporter, family-TRUNCATED-	1.4e-131	1.4e-131	4.10304	-17.2517	15.2999	-4.53687	2.10787	-5.98294	17.3829	5.58345	-8.0808	9.22404	21.7082	4.31438	0
TC16588	weakly similar to UP|Q8H3A4_ORYSA (Q8H3A4) ABC transporter permease protein-like protein, partial (43%)	NA	At3g51420.1	68416.m05632 strictosidine synthase family protein similar to hemomucin [Drosophila melanogaster][GI:1280434], strictosidine synthase [Rauvolfia serpentina][SP|P15324]; contains strictosidine synthase domain-TRUNCATED-	1e-43	1e-43	-8.8834	0.280519	14.8686	3.00848	-5.83012	-14.6504	1.76023	15.3463	-6.20437	4.49633	-2.71615	-17.6728	0
TC8568	similar to UP|LIPC_SOLTU (P80471) Light-induced protein, chloroplast precursor (Chloroplastic drought-induced stress protein CDSP-34), partial (74%)	GO:0006950;GO:0009535;GO:0005198	At4g04020.1	68417.m00572 plastid-lipid associated protein PAP, putative / fibrillin, putative strong similarity to plastid-lipid associated proteins PAP1 GI:14248554, PAP2 GI:14248556 from [Brassica rapa], fibrillin [Br-TRUNCATED-	1.7e-98	1.7e-98	-1.76801	-3.85227	13.4184	3.09197	-5.14231	-13.7799	6.90083	15.211	-8.38999	11.3784	1.34081	-5.7916	0
TC9002	similar to UP|Q8RVX1_SESRO (Q8RVX1) Pectin methylesterase precursor, partial (68%)	GO:0005576;GO:0009505;GO:0030599	At1g11580.1	68414.m01329 pectin methylesterase, putative similar to pectin methylesterase GI:1617583 from [Lycopersicon esculentum]	1.8e-156	1.8e-156	4.3884	-14.477	13.2577	1.51066	-7.78741	-14.4764	14.8804	15.2833	-3.59448	16.4113	6.55313	-2.56308	0
TC16794	similar to UP|Q8W3P6_VITVI (Q8W3P6) Chalcone synthase , complete	GO:0016210;GO:0009715;GO:0009813	At5g13930.1	68418.m01629 chalcone synthase / naringenin-chalcone synthase identical to SP|P13114	3.5e-153	3.5e-153	-3.87538	-12.3748	13.0771	4.33547	0.69773	-13.7099	4.53531	14.7771	-17.5228	6.41498	5.5993	-1.69807	0
TC16738	weakly similar to UP|Q8W415_TOBAC (Q8W415) CIG1, partial (74%)	GO:0004657;GO:0006537;GO:0006562	At3g30775.1	68416.m03933 proline oxidase, mitochondrial / osmotic stress-responsive proline dehydrogenase (POX) (PRO1) (ERD5) nearly identical to SP|P92983 Proline oxidase, mitochondrial precursor (EC 1.5.3.-) (Osmotic -TRUNCATED-	2.5e-127	2.5e-127	1.66704	-12.4986	12.9036	5.20576	-7.73632	-17.0932	9.18936	21.6888	-8.841	20.0244	5.32915	-3.87498	0
TC9024	weakly similar to UP|Q39684_DAUCA (Q39684) AX110P, partial (68%)	GO:0016491;GO:0006118;GO:0008152;GO:0008372	At4g09670.1	68417.m01588 oxidoreductase family protein similar to AX110P [Daucus carota] GI:285739; contains Pfam profiles PF01408: Oxidoreductase family NAD-binding Rossmann fold, PF02894: Oxidoreductase family C-termi-TRUNCATED-	2.8e-128	2.8e-128	-1.27703	-7.47251	12.7531	4.31929	-5.88119	-9.87325	6.11854	13.3322	-6.36379	13.2706	2.2192	-5.31843	0
TC17471	weakly similar to UP|Q9ZVT5_ARATH (Q9ZVT5) F15K9.6, partial (12%)	NA	At4g02920.1	68417.m00395 expressed protein	6.9e-61	6.9e-61	-5.2769	-6.62676	12.5656	6.33106	-4.60949	-17.991	3.78105	19.0877	-8.09943	9.77169	-0.0972897	-9.59094	0
TC14483	weakly similar to UP|Q9SVA8_ARATH (Q9SVA8) Cytochrome P450-like protein, partial (44%)	NA	At4g32170.1	68417.m04575 cytochrome P450, putative cytochrome p450, Arabidopsis thaliana, PID:G2252844	1.8e-101	1.8e-101	3.12371	-6.83474	12.5308	-12.5604	2.19254	0.420606	18.5479	-0.407178	-1.15091	2.81207	25.9793	7.00807	0
TC9634	similar to PRF|NP_563879.1|18391209|NP_563879 sodium symporter-related {Arabidopsis thaliana}, partial (68%)	GO:0005554	At1g10830.1	68414.m01244 sodium symporter-related contains five transmembrane domains; Interpro IPR001991 Sodium:dicarboxylate symporter; EST gb|F13926 comes from this gene	1.2e-125	1.2e-125	-2.53691	-7.03232	12.5266	6.21874	-3.69066	-12.7561	3.48728	17.5906	-10.5513	9.26138	0.443786	-6.26715	0
TC15966	similar to UP|Q8L8N9_ARATH (Q8L8N9) Spore coat protein-like protein, partial (90%)	GO:0005507;GO:0000004	At1g71040.1	68414.m08199 multi-copper oxidase type I family protein similar to SP|P07788 Spore coat protein A {Bacillus subtilis}; contains Pfam profile PF00394: Multicopper oxidase	3.1e-216	3.1e-216	0.698311	-12.1483	12.4949	6.23039	-8.68639	-20.0594	9.96896	17.5033	-8.29102	11.0976	3.64322	-2.6649	0
DR933592	weakly similar to PRF|NP_199827.2|22327681|NP_199827 ferric reductase-like transmembrane component family protein {Arabidopsis thaliana}, partial (34%)	NA	At5g50160.1	68418.m06212 ferric reductase-like transmembrane component family protein contains Pfam profile PF01794: Ferric reductase like transmembrane component	3.9e-99	3.9e-99	-6.39217	-4.48801	12.4705	1.83069	-0.000974477	-11.9638	1.84454	12.1249	-12.9097	2.76309	0.917963	-5.25006	0
TC10363	similar to UP|PME_PRUPE (Q43062) Pectinesterase PPE8B precursor (Pectin methylesterase) (PE) , partial (68%)	GO:0009505;GO:0030599	At4g33220.1	68417.m04729 pectinesterase family protein contains Pfam profile: PF01095 pectinesterase	1.7e-133	1.7e-133	5.08691	-17.0608	12.4636	-1.87873	-0.49475	-6.51726	12.1303	5.75617	-6.53964	12.0371	15.8005	4.04868	0
TC10965	weakly similar to PRF|NP_197028.1|15242252|NP_197028 amino acid transporter family protein {Arabidopsis thaliana}, partial (65%)	GO:0006865;GO:0016020	At5g15240.1	68418.m01785 amino acid transporter family protein low similarity to amino acid transporter system A3 [Homo sapiens] GI:13876616; belongs to INTERPRO:IPR002422 amino acid/polyamine transporter, family II -TRUNCATED-	3e-115	3e-115	5.80298	-8.5714	12.4597	-4.57798	-4.65274	-4.13683	21.7538	5.38025	-1.05185	11.3948	9.57148	1.48435	0
TC15095	similar to UP|Q5U9G0_OLEEU (Q5U9G0) Chloroplast fatty acid desaturase 6, partial (87%)	GO:0045485	At4g30950.1	68417.m04394 omega-6 fatty acid desaturase, chloroplast (FAD6) (FADC) identical to GI:493068	1e-176	1e-176	-5.33541	-1.17012	12.4424	4.62998	-8.92387	-11.4189	3.35948	13.4815	-5.34128	5.74748	-2.04261	-13.3279	0
DT763218	similar to UP|AMT13_LYCES (Q9FVN0) Ammonium transporter 1, member 3 (LeAMT1;3), partial (38%)	NA	At1g64780.1	68414.m07345 ammonium transporter 1, member 2 (AMT1.2) nearly identical to SP|Q9ZPJ8 Ammonium transporter 1, member 2 (AtAMT1;2) {Arabidopsis thaliana}	6.8e-70	6.8e-70	-3.35134	-3.29145	12.3825	3.06852	-3.49469	-12.7946	2.36586	14.7223	-7.7725	5.22939	-0.279063	-8.6308	0
TC12347	weakly similar to UP|Q9M4F2_BRANA (Q9M4F2) AtPP protein, partial (21%)	NA	At1g15125.1	68414.m01806 S-adenosyl-L-methionine:carboxyl methyltransferase family protein low similarity to caffeine synthase [Camellia sinensis] GI:9967143; contains Pfam profile PF03492: SAM dependent carboxyl methyl-TRUNCATED-	4e-65	4e-65	5.99135	-3.47958	12.3719	-5.68027	-5.20623	-2.68552	19.3171	2.25271	1.3123	7.14537	7.3322	0.579101	0
TC16496	weakly similar to PRF|NP_194433.1|15236949|NP_194433 expressed protein {Arabidopsis thaliana}, partial (39%)	NA	At4g27030.1	68417.m03887 expressed protein	4.1e-63	4.1e-63	-4.79844	-5.28972	12.1141	6.20645	-3.2037	-14.3944	2.38317	15.2242	-9.84225	8.10936	-0.00330608	-7.61688	0
TC16975	NA	GO:0016757;GO:0008372;GO:0008194	At2g36970.1	68415.m04534 UDP-glucoronosyl/UDP-glucosyl transferase family protein contains Pfam profile: PF00201 UDP-glucoronosyl and UDP-glucosyl transferase	7.9e-163	7.9e-163	6.88369	-11.3608	12.0597	1.08845	-8.14936	-9.51865	12.9045	8.39512	-3.0931	20.0963	5.3566	-0.648289	0
TC11859	weakly similar to PRF|NP_196878.2|22326785|NP_196878 sugar transporter family protein {Arabidopsis thaliana}, partial (59%)	GO:0005351;GO:0015144;GO:0005554;GO:0016020	At5g13740.1	68418.m01599 sugar transporter family protein contains Pfam profile PF00083: major facilitator superfamily protein	1.2e-104	1.2e-104	1.28195	-9.74825	11.69	4.46779	-6.67765	-16.0409	8.5756	12.7089	-6.50786	23.349	3.48901	-3.41056	0
TC19181	similar to UP|O65156_ZANAE (O65156) Glutathione peroxidase , partial (69%)	GO:0004602;GO:0005739;GO:0008372;GO:0005829	At4g31870.1	68417.m04528 glutathione peroxidase, putative glutathione peroxidase, Arabidopsis thaliana, PIR2:S71250	1.7e-82	1.7e-82	-1.99852	-8.78235	11.6861	4.42768	-4.1894	-19.1603	4.71689	18.0015	-8.83206	4.98061	2.06063	-4.64058	0
TC18439	weakly similar to PRF|NP_189538.2|42565277|NP_189538 amino acid transporter family protein {Arabidopsis thaliana}, partial (75%)	GO:0015359;GO:0006865;GO:0016020	At5g15240.1	68418.m01785 amino acid transporter family protein low similarity to amino acid transporter system A3 [Homo sapiens] GI:13876616; belongs to INTERPRO:IPR002422 amino acid/polyamine transporter, family II -TRUNCATED-	1.1e-126	1.1e-126	-0.833038	-10.5214	11.6519	5.62346	-5.94301	-14.592	7.10412	19.0695	-6.12686	10.5311	2.06648	-5.18242	0
TC16852	similar to UP|Q8LBH4_ARATH (Q8LBH4) Ids4-like protein, partial (85%)	GO:0000004;GO:0008372;GO:0005554	At2g26660.1	68415.m03198 SPX (SYG1/Pho81/XPR1) domain-containing protein low similarity to NUC-2 [Neurospora crassa] GI:1399532, xenotropic and polytropic murine leukemia virus receptor [Mus musculus castaneus] GI:60933-TRUNCATED-	1.7e-89	1.7e-89	-2.42279	-7.97174	11.0445	4.49032	-3.65721	-13.151	5.15147	11.9423	-8.33121	10.0247	2.19141	-3.29655	0
TC15251	weakly similar to UP|Q5ZC21_ORYSA (Q5ZC21) Esterase/lipase/thioesterase-like protein, partial (61%)	GO:0003824	At1g54570.1	68414.m06223 esterase/lipase/thioesterase family protein contains Interpro entry IPR000379	2.7e-162	2.7e-162	-1.66912	-8.64616	10.9361	2.83211	-4.27722	-11.7045	8.85429	14.7592	-11.5378	13.2147	4.48313	-4.9271	0
TC19268	weakly similar to UP|Q8VWW0_GOSHI (Q8VWW0) Polyphosphoinositide binding protein, partial (80%)	GO:0006810;GO:0005215;GO:0008372	At1g01630.1	68414.m00080 SEC14 cytosolic factor, putative / phosphoglyceride transfer protein, putative contains Pfam PF00650 : CRAL/TRIO domain and PF03765 : CRAL/TRIO, N-terminus; similar to polyphosphoinositide bindi-TRUNCATED-	9.5e-80	9.5e-80	-3.33526	-5.71599	10.9092	3.47537	-2.158	-10.7994	3.64406	11.2072	-5.86046	6.2337	1.94289	-4.33108	0
TC19306	weakly similar to PRF|NP_186847.1|15232238|NP_186847 short-chain dehydrogenase/reductase (SDR) family protein {Arabidopsis thaliana}, partial (65%)	NA	At3g01980.1	68416.m00155 short-chain dehydrogenase/reductase (SDR) family protein contains Pfam profiles: PF00106 short chain dehydrogenase, PF00678 short chain dehydrogenase/reductase C-terminus	6e-78	6e-78	2.22353	-7.73527	10.8889	-3.20224	-1.44217	-4.28194	11.4025	5.54587	-3.53664	5.97347	7.66551	0.181324	0
TC10161	similar to PRF|NP_197157.1|15237364|NP_197157 auxin efflux carrier family protein {Arabidopsis thaliana}, partial (77%)	GO:0009672;GO:0009926;GO:0005554	At5g16530.1	68418.m01933 auxin efflux carrier family protein contains auxin efflux carrier domain, Pfam:PF03547	2.7e-75	2.7e-75	-3.85039	-6.17881	10.765	5.82339	-5.50333	-21.9956	2.36493	15.4849	-8.94215	9.8235	0.0764377	-8.22241	0
DR933591	similar to PRF|NP_199827.2 ferric reductase-like transmembrane component family protein {Arabidopsis thaliana}, partial (2%)	NA	At5g50160.1	68418.m06212 ferric reductase-like transmembrane component family protein contains Pfam profile PF01794: Ferric reductase like transmembrane component	2e-26	2e-26	-5.63405	-6.01153	10.7614	2.08719	-0.254787	-12.7266	1.9483	10.5472	-11.0994	4.18764	2.14264	-3.44201	0
TC19602	similar to UP|Q943Z4_ARATH (Q943Z4) AT3g50560/T20E23_160, partial (25%)	NA	At3g50560.1	68416.m05530 short-chain dehydrogenase/reductase (SDR) family protein contains INTERPRO family IPR002198 short-chain dehydrogenase/reductase (SDR) superfamily	4.7e-38	4.7e-38	-2.26041	-3.07475	10.76	4.05622	-8.10539	-13.3513	5.57666	11.6653	-3.87971	9.2295	-0.349563	-6.58147	0
TC16717	weakly similar to UP|Y4967_ARATH (Q9SZ83) Probable oxidoreductase AT4g09670 , partial (65%)	GO:0016491;GO:0006118;GO:0008152;GO:0008372	At4g09670.1	68417.m01588 oxidoreductase family protein similar to AX110P [Daucus carota] GI:285739; contains Pfam profiles PF01408: Oxidoreductase family NAD-binding Rossmann fold, PF02894: Oxidoreductase family C-termi-TRUNCATED-	1.7e-103	1.7e-103	-0.153891	-12.1067	10.7343	4.46315	-3.7489	-14.266	3.98459	10.358	-9.20363	12.3484	3.25374	-3.23674	0
DT763219	homologue to UP|AMT13_LYCES (Q9FVN0) Ammonium transporter 1, member 3 (LeAMT1;3), partial (46%)	NA	At4g28700.1	68417.m04101 ammonium transporter, putative similar to SP|O04161 Ammonium transporter 1, member 2 (LeAMT1;2) {Lycopersicon esculentum}; contains Pfam profile PF00909: Ammonium Transporter Family	3.4e-91	3.4e-91	-4.7775	-2.33056	10.5029	2.96923	-3.24947	-13.2007	2.11695	14.5239	-6.47681	4.48884	-0.255314	-7.39316	0

## Sheet: STA
Genes down-regulated in STAmens (all: 115, highest absolute D stat: 66)																					Genes up-regulated in STAmens (all: 1418, highest absolute D stat: 1195)
SEQ_ID	Annotation	GO	db.match.accession	db.match.header	E.value	P.value	STA	CAR	PET	SEP	STD	STA+STD+CAR	PET+STA	SEP+PET	STA+CAR	SEP+PET+STA	PET+STA+STD	STA+STD	d stat test		SEQ_ID	Annotation	GO	db.match.accession	db.match.header	E.value	P.value	STA	CAR	PET	SEP	STD	STA+STD+CAR	PET+STA	SEP+PET	STA+CAR	SEP+PET+STA	PET+STA+STD	STA+STD	d stat test
TC8552	homologue to UP|Q9SNX8_APIGR (Q9SNX8) Nonreversible glyceraldehyde-3-phosphate dehydrogenase , partial (53%)	GO:0004028	At2g24270.1	68415.m02899 NADP-dependent glyceraldehyde-3-phosphate dehydrogenase, putative similar to NADP-dependent glyceraldehyde-3-phosphate dehydrogenase (NON-phosphorylating glyceraldehyde 3-phosphate; glyceraldehy-TRUNCATED-	6.4e-129	6.4e-129	-18.4295	6.12419	0.773298	4.33639	-0.376968	-3.93573	-8.82818	4.21151	-3.96656	-3.70246	-9.92053	-13.1787	18.4295		TC16505	similar to UP|Q9ZWQ2_LACSA (Q9ZWQ2) Gibberelin 20-oxidase, partial (91%)	GO:0045544;GO:0009686;GO:0009639;GO:0005737;GO:0009740;GO:0016707	At4g25420.1	68417.m03656 gibberellin 20-oxidase identical to GI:1109695	7.7e-133	7.7e-133	39.514	-4.10938	-5.33495	-2.71902	-1.35078	5.05049	7.15985	-7.16064	8.18033	6.48415	7.87633	12.3086	39.514
TC9292	similar to UP|Q4AE11_FRAAN (Q4AE11) Chalcone isomerase, partial (78%)	GO:0045430;GO:0009813	At3g55120.1	68416.m06121 chalcone-flavanone isomerase / chalcone isomerase (CHI) identical to SP|P41088	3.4e-68	3.4e-68	-16.2864	0.37133	4.1905	5.17535	0.468196	-5.51337	-4.60274	7.94865	-9.03528	-0.325312	-5.08723	-8.62806	16.2864		TC12516	weakly similar to PRF|NP_564430.1|18398991|NP_564430 GDSL-motif lipase/hydrolase family protein {Arabidopsis thaliana}, partial (20%)	NA	At5g15720.1	68418.m01838 GDSL-motif lipase/hydrolase family protein similar to family II lipase EXL3 (GI:15054386) and EXL2 (GI:15054384) [Arabidopsis thaliana]; contains Pfam profile PF00657: Lipase/Acylhydrolase with -TRUNCATED-	5.3e-63	5.3e-63	38.879	-6.26421	-4.55625	-2.03251	-0.815103	6.0801	6.29855	-5.53023	7.38009	5.77828	6.97937	13.8836	38.879
TC19878	similar to UP|Q9SWH0_NICPL (Q9SWH0) Plasma membrane proton ATPase, partial (35%)	NA	At1g17260.1	68414.m02102 ATPase 10, plasma membrane-type, putative / proton pump 10, putative / proton-exporting ATPase, putative strong similarity to SP|Q43128 ATPase 10, plasma membrane-type (EC 3.6.3.6) (Proton pump -TRUNCATED-	4.6e-131	4.6e-131	-15.5789	-0.660619	4.3872	7.72763	0.398695	-9.15835	-4.66683	11.2471	-9.66866	0.244212	-4.34013	-5.9517	15.5789		TC15864	similar to UP|Q4QYX3_MANIN (Q4QYX3) Beta-galactosidase (Fragment) , partial (40%)	NA	At5g20710.1	68418.m02459 beta-galactosidase, putative / lactase, putative strong similarity to beta-galactosidase precursor (EC 3.2.1.23) (Lactase) SP:P49676 from [Brassica oleracea]	1.3e-139	1.3e-139	36.2284	-5.90348	-3.75029	-1.77852	-3.86168	4.32054	9.41651	-4.74931	7.37376	8.66865	5.77205	9.74037	36.2284
TC9085	similar to UP|APK1A_ARATH (Q06548) Protein kinase APK1A, chloroplast precursor , partial (80%)	GO:0004674;GO:0005737;GO:0005730;GO:0016301;GO:0005634;GO:0008372	At1g07570.1	68414.m00810 protein kinase (APK1a) identical to Protein kinase APK1A from [Arabidopsis thaliana] SWISS-PROT:Q06548	3.3e-148	3.3e-148	-14.096	-2.21976	2.84826	7.77498	3.22771	-7.6538	-5.45421	8.77083	-8.18492	0.0142165	-3.40918	-5.21982	14.096		TC10622	similar to UP|UFOG5_MANES (Q40287) Flavonol 3-O-glucosyltransferase 5 (UDP-glucose flavonoid 3-O-glucosyltransferase 5) , partial (32%)	NA	At4g01070.1	68417.m00145 UDP-glucoronosyl/UDP-glucosyl transferase family protein contains Pfam profile: PF00201 UDP-glucoronosyl and UDP-glucosyl transferase	2.6e-102	2.6e-102	35.1064	-6.96853	-2.89759	-2.67703	-2.56176	4.15707	10.7051	-4.24163	5.25412	7.6891	7.59944	12.3381	35.1064
TC17483	similar to UP|Q681L5_ARATH (Q681L5) Adenosylmethionine-8-amino-7-oxononanoate aminotransferase-like protein, partial (67%)	GO:0004015;GO:0009102	At5g57590.1	68418.m07195 aminotransferase class III family protein low similarity to 7,8-diaminopelargonic acid aminotransferase BioA [Mesorhizobium loti] GI:12044306; contains Pfam profile PF00202: aminotransferase, c-TRUNCATED-	5.7e-137	5.7e-137	-14.0733	1.09654	0.826225	3.19457	4.47451	-2.88532	-5.57268	1.62094	-8.11771	-4.26968	-1.70113	-2.91143	14.0733		DR938788	similar to UP|Q9XGU3_CHLRE (Q9XGU3) Phosphatase PP1, partial (80%)	NA	At2g39840.1	68415.m04893 serine/threonine protein phosphatase PP1 isozyme 4 (TOPP4) / phosphoprotein phosphatase 1 identical to SP|P48484 Serine/threonine protein phosphatase PP1 isozyme 4 (EC 3.1.3.16) {Arabidopsis tha-TRUNCATED-	4e-120	4e-120	34.9007	-4.93654	-3.98188	-1.94019	-1.39824	5.2693	6.59306	-4.60578	6.84209	3.82371	5.14723	10.7196	34.9007
TC9289	similar to UP|Q6UK15_GOSHI (Q6UK15) Al-induced protein, complete	GO:0009733;GO:0005554;GO:0010044	At5g19140.1	68418.m02278 auxin/aluminum-responsive protein, putative strong similarity to auxin down-regulated protein ARG10 [Vigna radiata] GI:2970051, wali7 (aluminum-induced protein) [Triticum aestivum] GI:451193 -TRUNCATED-	4.3e-100	4.3e-100	-13.7225	1.88015	-2.04591	2.5578	5.32959	-1.47382	-8.42956	1.60253	-5.29509	-5.99549	-5.54244	-3.18969	13.7225		TC9981	weakly similar to UP|Q9LTW4_ARATH (Q9LTW4) Chloroplast nucleoid DNA binding protein-like, partial (44%)	NA	At3g12700.1	68416.m01587 aspartyl protease family protein contains Pfam PF00026: Eukaryotic aspartyl protease; similar to CND41, chloroplast nucleoid DNA binding protein (GI:2541876) [Nicotiana tabacum]	4.9e-92	4.9e-92	34.7048	-5.5199	-7.3589	-2.79913	-0.673765	8.04062	8.37924	-7.91984	8.30987	5.36543	7.72215	16.1906	34.7048
DT745049	homologue to UP|Q8LLE2_SOLTU (Q8LLE2) BEL1-related homeotic protein 13 (Fragment), partial (29%)	NA	At2g23760.1	68415.m02837 BEL1-like homeobox 4 protein (BLH4)	3.3e-41	3.3e-41	-13.3598	-3.05963	4.46812	5.79959	1.25042	-11.2624	-3.50408	9.15484	-8.22846	1.34693	-2.33221	-5.43221	13.3598		TC11398	weakly similar to PRF|NP_568318.1|18417760|NP_568318 GDSL-motif lipase/hydrolase family protein {Arabidopsis thaliana}, partial (27%)	NA	At5g15720.1	68418.m01838 GDSL-motif lipase/hydrolase family protein similar to family II lipase EXL3 (GI:15054386) and EXL2 (GI:15054384) [Arabidopsis thaliana]; contains Pfam profile PF00657: Lipase/Acylhydrolase with -TRUNCATED-	7.6e-71	7.6e-71	34.6565	-7.2897	-4.20562	-1.98177	-1.86832	5.00387	9.02922	-5.98772	7.79909	7.47675	7.76293	13.3993	34.6565
TC11035	weakly similar to UP|Q84XG7_SOLTU (Q84XG7) Erwinia induced protein 1, partial (58%)	NA	At2g17120.1	68415.m01976 peptidoglycan-binding LysM domain-containing protein contains Pfam profile PF01476: LysM domain; supporting cDNA gi|16226688|gb|AF428464.1|AF428464	2.3e-76	2.3e-76	-13.1702	2.88174	1.5924	4.21822	1.19146	-4.0183	-6.52387	4.12053	-4.28818	-2.7305	-5.83933	-5.18819	13.1702		TC18633	similar to UP|Q6ZI65_ORYSA (Q6ZI65) No apical meristem (NAM)-like protein, partial (23%)	NA	At3g01600.1	68416.m00091 no apical meristem (NAM) family protein contains Pfam PF02365: No apical meristem (NAM) domain;	1.9e-35	1.9e-35	34.2884	-2.82921	-5.61352	-3.56858	-2.78362	8.24114	7.44998	-7.26731	11.9935	3.87939	5.07741	12.2562	34.2884
TC14748	similar to UP|Q9FU27_ORYSA (Q9FU27) CCCH-type zinc finger protein-like, partial (47%)	GO:0003676;GO:0045449;GO:0003700	At2g19810.1	68415.m02316 zinc finger (CCCH-type) family protein contains Pfam domain, PF00642: Zinc finger C-x8-C-x5-C-x3-H type (and similar)	2.6e-92	2.6e-92	-13.1681	13.1553	1.34024	1.2557	-1.18476	-2.34302	-7.42134	2.47516	-1.45627	-6.45951	-7.33032	-10.2987	13.1681		TC18153	similar to UP|CDPK1_ARATH (Q06850) Calcium-dependent protein kinase, isoform AK1 (CDPK) , partial (77%)	GO:0005737;GO:0016301;GO:0004685;GO:0005634;GO:0005739;GO:0006468	At2g38910.1	68415.m04783 calcium-dependent protein kinase, putative / CDPK, putative similar to calcium-dependent protein kinase, isoform AK1 (CDPK) [Arabidopsis thaliana] SWISS-PROT:Q06850; contains protein kinase doma-TRUNCATED-	1e-217	1e-217	33.7983	-5.01599	-2.53865	-3.94417	-1.82883	6.03276	10.3643	-5.68046	7.12861	6.37695	9.32311	12.1247	33.7983
TC14225	similar to UP|Q6L724_HORVU (Q6L724) ATP-dependent RNA helicase, partial (74%)	GO:0008026;GO:0005524	At5g26742.1	68418.m03161 DEAD box RNA helicase (RH3) nearly identical to RNA helicase [Arabidopsis thaliana] GI:3775987; contains Pfam profiles PF00270: DEAD/DEAH box helicase, PF00271: Helicase conserved C-terminal dom-TRUNCATED-	1.5e-278	1.5e-278	-13.16	9.24849	1.7094	3.74743	-4.3873	-2.74211	-6.08343	2.90176	-0.67268	-3.17497	-11.4705	-10.2414	13.16		TC13556	weakly similar to UP|Q53UH5_IPOPU (Q53UH5) Glucosyltransferase, partial (47%)	NA	At5g54010.1	68418.m06718 glycosyltransferase family protein contains Pfam profile: PF00201 UDP-glucoronosyl and UDP-glucosyl transferase	7.2e-82	7.2e-82	33.3144	-5.57971	-4.27744	-2.29478	-1.714	4.85538	4.45736	-4.42503	7.05441	5.14798	5.5061	9.03797	33.3144
TC19866	similar to UP|O24342_SORBI (O24342) Serine/threonine kinase , partial (54%)	NA	At2g26980.3	68415.m03237 CBL-interacting protein kinase 3 (CIPK3) identical to CBL-interacting protein kinase 3 [Arabidopsis thaliana] gi|9280638|gb|AAF86507	3.1e-97	3.1e-97	-13.1115	6.14128	1.31705	0.48948	0.191987	-1.863	-6.49755	1.86404	-1.99831	-4.27449	-5.47135	-8.26219	13.1115		TC9333	weakly similar to UP|Q6F6A4_DAUCA (Q6F6A4) Cysteine protease, partial (84%)	GO:0006508;GO:0007568;GO:0008234	At5g45890.1	68418.m05644 senescence-specific SAG12 protein (SAG12) / cysteine proteinase, putative identical to senescence-specific protein SAG12 GI:1046373 from [Arabidopsis thaliana]	3.2e-104	3.2e-104	33.1062	-4.03835	-3.16108	-1.46099	-3.03192	4.25909	8.37879	-5.02113	7.9442	5.32338	5.29886	8.89541	33.1062
TC8705	weakly similar to UP|Q6WB13_9ASTR (Q6WB13) Anthocyanidin 3-O-glucoside-6''-O-malonyltransferase, partial (38%)	NA	At1g03940.1	68414.m00379 transferase family protein similar to anthocyanin 5-aromatic acyltransferase from Gentiana triflora GI:4185599, malonyl CoA:anthocyanin 5-O-glucoside-6'''-O-malonyltransferase from Perilla frute-TRUNCATED-	2.9e-71	2.9e-71	-13.0769	0.805275	2.64574	0.884359	3.94599	-2.698	-5.91142	2.95144	-6.80288	-3.70717	-1.42103	-4.1737	13.0769		DR943317	weakly similar to UP|Q9FNF8_ARATH (Q9FNF8) Ubiquitin, partial (19%)	NA	At2g46500.1	68415.m05790 phosphatidylinositol 3- and 4-kinase family protein / ubiquitin family protein contains INTERPRO:IPR000626 ubiquitin domain	1.2e-61	1.2e-61	32.492	-5.25929	-3.68687	-2.88183	-0.94285	5.49063	8.21802	-4.44222	6.75517	3.23527	3.54364	5.34913	32.492
TC15781	similar to UP|Q9FKP2_ARATH (Q9FKP2) Na/Ca,K-exchanger-like protein, partial (48%)	NA	At5g17860.1	68418.m02093 cation exchanger, putative (CAX7) contains similarity to SWISS-PROT:Q9HC58 NKX3_HUMAN Sodium/potassium/calcium exchanger 3 precursor {Homo sapiens}; Ca2+:Cation Antiporter (CaCA) Family member P-TRUNCATED-	2.1e-139	2.1e-139	-12.9949	0.978033	-0.732844	4.43317	1.66819	-4.0226	-8.02687	2.81645	-5.88419	-3.10642	-6.76198	-4.29685	12.9949		TC12735	weakly similar to PRF|NP_186860.1|15232847|NP_186860 serine carboxypeptidase S10 family protein {Arabidopsis thaliana}, partial (51%)	GO:0006508;GO:0004185	At3g63470.1	68416.m07147 serine carboxypeptidase, putative similar to SP|P52711 Serine carboxypeptidase II-3 precursor (EC 3.4.16.6) Hordeum vulgare; contains Pfam profile PF0450 serine carboxypeptidase	7.4e-112	7.4e-112	32.4178	-9.98339	-4.82283	-1.89202	0.122467	6.21241	9.03046	-5.00884	4.84106	6.73234	9.30131	17.6133	32.4178
TC9033	similar to UP|HEMH_ORYSA (O22101) Ferrochelatase II, chloroplast precursor (Protoheme ferro-lyase) (Heme synthetase) (Fragment) , partial (85%)	GO:0004325;GO:0006783	At2g30390.1	68415.m03698 ferrochelatase II identical to Swiss-Prot:O04921 ferrochelatase II, chloroplast precursor (EC 4.99.1.1) (Protoheme ferro-lyase) (Heme synthetase) [Arabidopsis thaliana]	5.4e-196	5.4e-196	-12.9479	7.63625	0.348397	3.19079	0.820519	-1.38693	-8.00829	1.97954	-2.95304	-5.4697	-6.68825	-4.47102	12.9479		TC11807	similar to PRF|NP_180399.2|42569411|NP_180399 pleckstrin homology (PH) domain-containing protein / lipid-binding START domain-containing protein {Arabidopsis thaliana}, partial (53%)	GO:0000004;GO:0008372;GO:0005554	At2g28320.1	68415.m03442 pleckstrin homology (PH) domain-containing protein / lipid-binding START domain-containing protein contains Pfam profiles PF01852: START domain, PF00169: PH domain	2.3e-181	2.3e-181	32.4032	-5.85914	-6.34128	-3.21225	-0.660079	8.34511	8.69722	-8.30513	8.82931	5.03727	7.34613	15.3382	32.4032
TC18193	similar to UP|Q41241_LYCES (Q41241) Alcohol dehydrogenase ADH, partial (90%)	GO:0004022;GO:0008372	At5g42250.1	68418.m05143 alcohol dehydrogenase, putative similar to alcohol dehydrogenase ADH GI:7705214 from [Lycopersicon esculentum]; contains Pfam zinc-binding dehydrogenase domain PF00107	1.1e-142	1.1e-142	-12.4032	0.110061	3.38966	0.418941	6.87495	-1.37497	-4.6078	2.72868	-8.03735	-4.28109	-0.468361	-2.56313	12.4032		TC17539	similar to UP|Q9LXC0_ARATH (Q9LXC0) GDP dissociation inhibitor, complete	GO:0007264;GO:0016192;GO:0009986;GO:0043087;GO:0008372;GO:0005794;GO:0015031;GO:0005092;GO:0005093;GO:0005515;GO:0006899;GO:0005096;GO:0005097;GO:0005624;GO:0005625;GO:0007165	At3g59920.1	68416.m06687 Rab GDP dissociation inhibitor (GDI2) identical to Rab GDP dissociation inhibitor AtGDI2 [Arabidopsis thaliana] GI:2446981	1.8e-195	1.8e-195	32.3329	-7.1262	-6.31863	-2.13667	-1.05097	6.87641	8.80729	-6.42244	7.02551	5.16243	8.00182	15.4079	32.3329
TC13977	similar to PRF|NP_188660.3|30685690|NP_188660 pumilio/Puf RNA-binding domain-containing protein {Arabidopsis thaliana}, partial (15%)	NA	At3g20250.1	68416.m02565 pumilio/Puf RNA-binding domain-containing protein contains Pfam profile: PF00806 Pumilio-family RNA binding domains (aka PUM-HD, Pumilio homology domain) (8 copies at C-terminus)	2.8e-55	2.8e-55	-12.2174	4.76742	0.519319	-0.0373657	1.29005	-0.49925	-6.21012	0.481779	-1.0393	-5.31675	-3.03921	-4.46557	12.2174		TC12523	similar to UP|Q4L0F8_MEDSA (Q4L0F8) Protein phosphatase 2c, partial (35%)	NA	At3g02750.1	68416.m00267 protein phosphatase 2C family protein / PP2C family protein similar to protein phosphatase-2C; PP2C (GI:3643088) [Mesembryanthemum crystallinum]; contains Pfam PF00481 : Protein phosphatase 2C d-TRUNCATED-	2.4e-58	2.4e-58	31.9449	-4.21855	-3.43981	-2.78654	-2.42297	5.70575	8.22455	-5.24255	7.11276	5.71015	6.14981	10.413	31.9449
TC15693	similar to PRF|NP_191155.1|15228783|NP_191155 NLI interacting factor (NIF) family protein {Arabidopsis thaliana}, partial (66%)	GO:0000004;GO:0005554;GO:0008372	At3g55960.1	68416.m06218 NLI interacting factor (NIF) family protein contains Pfam profile PF03031: NLI interacting factor	5.1e-73	5.1e-73	-12.173	-1.36249	-1.83031	10.282	2.97727	-6.20868	-9.74462	5.88251	-8.60526	-1.17025	-6.75896	-3.60806	12.173		TC13511	weakly similar to UP|Q4JHI1_SESIN (Q4JHI1) Caleosin B, partial (61%)	GO:0000004;GO:0005509;GO:0009269;GO:0008372	At2g33380.1	68415.m04091 calcium-binding RD20 protein (RD20) induced by abscisic acid during dehydration PMID:10965948; putative transmembrane channel protein PMID:10965948; identical to GI:10862968 [Arabidopsis thalian-TRUNCATED-	1.6e-70	1.6e-70	31.4136	-4.0825	-2.99801	-2.57397	-1.90342	4.23438	7.50207	-4.87929	5.26573	5.12847	6.09122	9.03336	31.4136
TC16366	weakly similar to PRF|NP_564999.1|18409667|NP_564999 expressed protein {Arabidopsis thaliana}, partial (36%)	NA	At1g70750.1	68414.m08155 expressed protein contains Pfam profile PF04576: Protein of unknown function, DUF593; supporting cDNA gi|4101563|gb|AF004556.1|AF004556	1.1e-42	1.1e-42	-12.1448	2.53505	5.43472	-0.450296	1.04058	-1.41762	-1.20084	3.43067	-4.34349	-2.35003	-1.75367	-5.55896	12.1448		TC14835	similar to UP|Q39651_9ROSI (Q39651) PreproMP27-MP32 precursor, partial (53%)	GO:0045735	At2g28490.1	68415.m03462 cupin family protein similar to preproMP27-MP32 [Cucurbita cv. Kurokawa Amakuri] GI:691752, allergen Gly m Bd 28K [Glycine max] GI:12697782, vicilin [Matteuccia struthiopteris] GI:1019792; conta-TRUNCATED-	9.4e-118	9.4e-118	31.1154	-5.19691	-6.47673	-1.31277	-2.67262	6.56307	7.84689	-6.63223	8.48479	6.24301	5.34895	13.6517	31.1154
TC15848	weakly similar to PRF|NP_195382.1|15234469|NP_195382 SEC14 cytosolic factor family protein / phosphoglyceride transfer family protein {Arabidopsis thaliana}, partial (79%)	GO:0006810;GO:0005215	At1g75170.1	68414.m08731 SEC14 cytosolic factor family protein / phosphoglyceride transfer family protein similar to polyphosphoinositide binding protein Ssh1p (GI:2739044) {Glycine max}; similar to SEC14 cytosolic fact-TRUNCATED-	2.4e-113	2.4e-113	-12.1244	1.39989	1.95457	3.81622	-0.746884	-6.93679	-2.54618	5.69966	-5.68569	-0.713001	-4.65847	-8.43281	12.1244		TC12936	similar to UP|Q652I7_ORYSA (Q652I7) SEC14 cytosolic factor-like, partial (23%)	NA	At1g30690.1	68414.m03752 SEC14 cytosolic factor family protein / phosphoglyceride transfer family protein contains Pfam PF00650 : CRAL/TRIO domain; contains Pfam PF03765 : CRAL/TRIO, N-terminus; similar to cytosolic fac-TRUNCATED-	2.8e-74	2.8e-74	30.8592	-6.01441	-4.29851	-2.14346	-0.676951	5.4838	8.38979	-5.46663	5.37909	5.33186	6.22367	13.4466	30.8592
TC16117	similar to UP|Q9LUI0_ARATH (Q9LUI0) Emb|CAB10253.1, partial (22%)	NA	At3g22810.1	68416.m02875 expressed protein ; expression supported by MPSS	3.9e-42	3.9e-42	-12.0712	3.4289	1.69022	-1.254	3.96559	-0.325226	-6.21157	0.361171	-3.01938	-8.08471	-1.38908	-2.71342	12.0712		TC17994	similar to PRF|NP_563726.1|18390470|NP_563726 epsin N-terminal homology (ENTH) domain-containing protein / clathrin assembly protein-related {Arabidopsis thaliana}, partial (41%)	NA	At1g05020.1	68414.m00503 epsin N-terminal homology (ENTH) domain-containing protein / clathrin assembly protein-related Similar to clathrin assembly protein gb|X68878 (AP180) from Rattus norvegicus; contains Pfam PF0141-TRUNCATED-	9.9e-117	9.9e-117	30.4669	-7.10023	-4.9913	-2.21631	-0.0842129	5.23235	7.96671	-7.5208	6.08444	7.111	8.58167	16.2135	30.4669
TC8050	similar to UP|GOX2_ARATH (Q9LRR9) Probable (S)-2-hydroxy-acid oxidase, peroxisomal 2 (Glycolate oxidase 2) (GOX 2) (Short chain alpha-hydroxy acid oxidase 2) , complete	GO:0009854;GO:0008891;GO:0016491;GO:0006118;GO:0005777;GO:0001561;GO:0003973	At3g14420.1	68416.m01826 (S)-2-hydroxy-acid oxidase, peroxisomal, putative / glycolate oxidase, putative / short chain alpha-hydroxy acid oxidase, putative similar to (S)-2-hydroxy-acid oxidase, peroxisomal (Glycolate o-TRUNCATED-	4.3e-171	4.3e-171	-11.8949	0.231797	3.90013	6.32722	-2.22167	-7.01624	-2.13712	10.0504	-5.84514	1.25145	-4.73511	-9.21214	11.8949		TC18880	similar to UP|Q8VYI1_ARATH (Q8VYI1) At1g69640/F24J1.22, partial (92%)	GO:0003824	At1g69640.1	68414.m08012 acid phosphatase, putative similar to GI:5360721 from [Lupinus albus]	2e-109	2e-109	30.3888	-3.24005	-5.51311	-3.48536	-1.32321	7.44347	6.68427	-6.42744	8.39401	3.01767	5.47217	11.6691	30.3888
TC15239	similar to UP|Q76KW1_PEA (Q76KW1) Glutathione S-transferase, partial (85%)	GO:0000004;GO:0005554;GO:0008372	At5g02790.1	68418.m00221 In2-1 protein, putative similar to In2-1, Zea mays, EMBL:X58573	1.5e-81	1.5e-81	-11.889	1.63988	3.28815	4.35493	-1.71092	-6.75232	-2.90695	6.34909	-3.45406	0.200706	-4.33857	-4.55015	11.889		TC11380	similar to PRF|NP_187453.1|15231902|NP_187453 phosphatidylinositol-4-phosphate 5-kinase family protein {Arabidopsis thaliana}, partial (52%)	GO:0016308;GO:0008372	At3g07960.1	68416.m00973 phosphatidylinositol-4-phosphate 5-kinase family protein similar to phosphatidylinositol-4-phosphate 5-kinase AtPIP5K1 [Arabidopsis thaliana] GI:3702691; contains Pfam profiles PF01504: Phosphat-TRUNCATED-	5.6e-172	5.6e-172	30.1006	-1.54154	-5.52643	-4.71437	-3.70527	8.12844	8.29916	-6.49043	15.4183	4.44736	4.73558	9.28313	30.1006
TC15042	similar to UP|Q39048_ARATH (Q39048) Cer2 protein, partial (14%)	NA	At3g23840.1	68416.m02997 transferase family protein low similarity to hypersensitivity-related gene [Nicotiana tabacum] GI:1171577, acetyl-CoA:benzylalcohol acetyltranferase [Clarkia concinna] GI:6166330; contains Pfam -TRUNCATED-	1.7e-73	1.7e-73	-11.7903	6.36823	-2.81739	0.149302	8.36741	2.37079	-5.95304	-1.75013	-2.9351	-5.36051	-5.53138	-1.96464	11.7903		TC12795	similar to UP|Q7X9I0_ARATH (Q7X9I0) MADS-box protein AGL65, partial (39%)	NA	At1g18750.1	68414.m02338 MADS-box protein (AGL65) similar to homeodomain transcription factor (AGL30) GI:3461830 from [Arabidopsis thaliana]; contains Pfam domain PF00319: SRF-type transcription factor (DNA-binding and -TRUNCATED-	1.7e-80	1.7e-80	30.0897	-5.56554	-2.92739	-2.1168	-3.58313	4.33038	11.4249	-3.91999	7.36079	5.38592	6.54725	10.1502	30.0897
TC8553	homologue to UP|GAPN_NICPL (P93338) NADP-dependent glyceraldehyde-3-phosphate dehydrogenase (Non-phosphorylating glyceraldehyde 3-phosphate dehydrogenase) (Glyceraldehyde-3-phosphate dehydrogenase [NADP+]) (Triosephosphate dehydrogenase) , partial (53%)	GO:0004028	At2g24270.1	68415.m02899 NADP-dependent glyceraldehyde-3-phosphate dehydrogenase, putative similar to NADP-dependent glyceraldehyde-3-phosphate dehydrogenase (NON-phosphorylating glyceraldehyde 3-phosphate; glyceraldehy-TRUNCATED-	2.6e-125	2.6e-125	-11.5349	6.40275	0.671356	4.26628	-1.24455	-3.7427	-8.48638	3.18691	-2.89141	-3.5393	-9.9859	-8.48556	11.5349		TC11445	similar to PRF|NP_188511.1|15230209|NP_188511 protein kinase family protein {Arabidopsis thaliana}, partial (45%)	GO:0004672;GO:0005524;GO:0006468	At3g18810.1	68416.m02389 protein kinase family protein contains Pfam PF00069: Protein kinase domain	9.3e-153	9.3e-153	29.8119	-8.60355	-6.75327	-1.32967	0.215205	6.07778	7.17683	-4.28176	6.02882	6.40708	8.25948	15.9999	29.8119
TC15256	similar to UP|ICE1_ARATH (Q9LSE2) Transcription factor ICE1 (Inducer of CBF expression 1) (Basic helix-loop-helix protein 116) (bHLH116) (AtbHLH116), partial (52%)	GO:0003677;GO:0003700	At3g26744.1	68416.m03344 basix helix-loop-helix (bHLH) family protein contains Pfam profile: PF00010 helix-loop-helix DNA-binding domain	5.4e-93	5.4e-93	-11.4933	8.66131	-0.422876	3.82262	-2.67085	-2.42736	-11.3558	2.08859	-0.0764564	-3.30831	-11.3223	-8.65898	11.4933		TC15657	similar to UP|Q8S9K9_ARATH (Q8S9K9) AT4g03420/F9H3_4, partial (69%)	GO:0000004;GO:0005554;GO:0008372	At1g03610.1	68414.m00341 expressed protein	3.9e-90	3.9e-90	29.5206	-4.4131	-3.30085	-4.28153	-1.48792	5.99779	7.29339	-6.32507	7.03673	5.52225	7.19267	8.53562	29.5206
TC10591	weakly similar to UP|Q5JKN2_ORYSA (Q5JKN2) Abl tyrosine kinase-interacting-like protein, partial (20%)	NA	At5g24310.1	68418.m02861 expressed protein strong similarity to unknown protein (emb|CAB66408.1)	2.8e-29	2.8e-29	-11.436	2.30524	0.0546317	0.995258	4.16019	-0.945631	-7.35555	1.06672	-2.51457	-3.26694	-2.53827	-2.49838	11.436		TC11228	weakly similar to PRF|NP_567536.1|18414951|NP_567536 RNA recognition motif (RRM)-containing protein {Arabidopsis thaliana}, partial (66%)	GO:0003676;GO:0000004	At4g17720.1	68417.m02646 RNA recognition motif (RRM)-containing protein	5.8e-73	5.8e-73	29.3951	-4.34092	-5.50563	-2.89884	-0.941805	7.60614	6.07508	-4.75205	8.03894	3.94085	6.24552	12.2335	29.3951
TC17107	similar to UP|Q56ZM6_ARATH (Q56ZM6) Protein kinase (Fragment), partial (87%)	NA	At1g52310.1	68414.m05902 protein kinase family protein / C-type lectin domain-containing protein contains protein kinase domain, Pfam:PF00069, PF00059 Lectin C-type domain	1.2e-97	1.2e-97	-11.0709	7.73733	-0.128321	1.53463	-0.672725	-1.15649	-6.29278	1.1838	-0.603706	-4.04196	-8.25577	-9.12223	11.0709		DT740486	similar to UP|Q9FHF1_ARATH (Q9FHF1) Multidrug resistance p-glycoprotein, partial (15%)	NA	At5g46540.1	68418.m05730 ABC transporter family protein contains Pfam profile: PF00005 ABC transporter; similar to multidrug-resistant protein CjMDR1 GI:14715462 from [Coptis japonica]	1.6e-74	1.6e-74	29.3899	-5.03165	-3.42861	-2.10851	-1.49606	4.29787	8.53599	-5.27049	6.199	5.85872	6.4221	11.1137	29.3899
TC9005	similar to UP|Q7XYY0_MEDTR (Q7XYY0) AKIN gamma, partial (83%)	GO:0000004;GO:0005554;GO:0008372	At3g48530.1	68416.m05299 CBS domain-containing protein low similarity to SP|Q9UGI9 5'-AMP-activated protein kinase, gamma-3 subunit (AMPK gamma-3 chain) (AMPK gamma3) {Homo sapiens}; contains Pfam profile PF00571: CBS d-TRUNCATED-	1e-137	1e-137	-11.0532	0.908339	5.2935	1.39298	0.621009	-4.98146	-2.49037	5.15484	-5.3557	-1.02122	-1.28988	-6.13088	11.0532		TC18292	similar to PRF|NP_171859.1|15218859|NP_171859 phagocytosis and cell motility protein ELMO1-related {Arabidopsis thaliana}, partial (77%)	GO:0005554	At1g03620.1	68414.m00342 phagocytosis and cell motility protein ELMO1-related contains weak similarity to ELMO1 [Mus musculus] gi|16118551|gb|AAL14464	5.9e-97	5.9e-97	29.2865	-4.73922	-4.99834	-3.14438	-1.51566	6.59875	8.09412	-6.62502	8.73292	4.45421	6.26901	12.7342	29.2865
TC18938	similar to UP|Q4LDR0_LYCES (Q4LDR0) Heat shock protein, partial (46%)	NA	At5g15450.1	68418.m01808 heat shock protein 100, putative / HSP100, putative / heat shock protein clpB, putative / HSP100/ClpB, putative similar to HSP100/ClpB GI:9651530 [Phaseolus lunatus]	1.2e-206	1.2e-206	-11.053	0.338736	4.89005	6.44047	-1.06752	-10.6905	-3.29943	9.39174	-6.6352	0.981371	-3.71802	-10.4777	11.053		TC19941	similar to PRF|NP_192271.1|15236347|NP_192271 myosin heavy chain-related {Arabidopsis thaliana}, partial (10%)	NA	At4g03620.1	68417.m00497 myosin heavy chain-related contains weak similarity to Swiss-Prot:P24733 myosin heavy chain, striated muscle [Aequipecten irradians]	1.7e-64	1.7e-64	29.239	-6.41008	-4.69434	-1.94778	-0.29325	5.33622	7.82862	-6.24223	5.78465	5.62311	7.62582	12.0429	29.239
TC19098	similar to PRF|NP_566858.1|18406975|NP_566858 expressed protein {Arabidopsis thaliana}, partial (46%)	NA	At3g32930.1	68416.m04173 expressed protein	1.7e-50	1.7e-50	-10.9961	2.53752	1.98211	5.47732	-0.500751	-5.89485	-5.10476	3.65321	-4.90992	-1.68565	-3.79453	-9.21424	10.9961		TC16407	weakly similar to UP|Q8W176_BRAOL (Q8W176) Hexokinase , partial (40%)	NA	At4g37840.1	68417.m05353 hexokinase, putative similar to hexokinase 1 [Spinacia oleracea] Swiss-Prot:Q9SEK3	6.6e-117	6.6e-117	29.2138	-9.10512	-7.03217	-1.24863	0.229387	6.34747	5.9767	-6.76924	6.18278	6.22023	7.07772	13.9754	29.2138
TC17106	similar to UP|Q56ZM6_ARATH (Q56ZM6) Protein kinase (Fragment), partial (87%)	NA	At1g52310.1	68414.m05902 protein kinase family protein / C-type lectin domain-containing protein contains protein kinase domain, Pfam:PF00069, PF00059 Lectin C-type domain	1.1e-124	1.1e-124	-10.9926	8.28122	-0.18434	2.04249	-1.05121	-1.60743	-6.6912	1.66491	-0.6803	-3.64734	-8.9721	-5.79424	10.9926		TC8968	similar to UP|Q9FYX1_LYCES (Q9FYX1) BAC19.5, partial (79%)	GO:0000004;GO:0005554;GO:0008372	At5g05840.1	68418.m00642 expressed protein contains Pfam profile PF04788: Protein of unknown function (DUF620); expression supported by MPSS	8.5e-111	8.5e-111	29.0692	-8.46292	-5.68104	-2.0095	-0.0780435	4.80889	7.88829	-5.97289	6.05334	6.05724	8.58055	9.63497	29.0692
TC17818	similar to UP|Q84P17_ARATH (Q84P17) Acyl-activating enzyme 18, partial (46%)	NA	At1g55320.1	68414.m06319 acyl-activating enzyme 18 (AAE18) nearly identical to acyl-activating enzyme 18 [Arabidopsis thaliana] GI:29893268; similar to acetyl-CoA synthetase [SP|P27095] from Methanothrix soehngenii; con-TRUNCATED-	2.9e-142	2.9e-142	-10.9811	2.79116	3.99449	2.40641	-0.15186	-5.03698	-5.64071	3.2459	-4.86968	-1.62043	-2.32428	-9.26157	10.9811		TC12600	similar to UP|Q9ZW88_ARATH (Q9ZW88) F5A8.10 protein, complete	GO:0000004;GO:0005554;GO:0008372	At1g67190.1	68414.m07643 F-box family protein	2e-173	2e-173	28.7588	-7.12085	-3.24128	-3.36826	-1.82503	5.05563	10.1181	-5.26114	7.5169	6.18729	7.17767	11.1146	28.7588
TC19366	weakly similar to UP|Q96400_CUCSA (Q96400) Nitrite transporter, partial (28%)	NA	At1g68570.1	68414.m07834 proton-dependent oligopeptide transport (POT) family protein contains Pfam profile: PF00854 POT family	4.9e-108	4.9e-108	-10.9772	-2.09189	2.1939	7.42366	1.40672	-7.49126	-3.68009	7.39577	-8.18636	0.474986	-3.03186	-5.48884	10.9772		DT740487	weakly similar to UP|Q9M1Q9_ARATH (Q9M1Q9) P-glycoprotein-like proetin, partial (12%)	NA	At2g47000.1	68415.m05871 multidrug resistant (MDR) ABC transporter, putative similar to multidrug-resistant protein CjMDR1 [Coptis japonica] GI:14715462, MDR-like p-glycoprotein [Arabidopsis thaliana] GI:24324262; conta-TRUNCATED-	3.2e-50	3.2e-50	28.7418	-6.00269	-4.07826	-1.483	-0.530533	4.75994	6.58154	-4.38597	4.89928	5.16844	5.88458	12.1035	28.7418
TC16118	similar to PRF|NP_193210.2|22328630|NP_193210 expressed protein {Arabidopsis thaliana}, partial (57%)	GO:0000004;GO:0008372;GO:0005554	At3g22810.1	68416.m02875 expressed protein ; expression supported by MPSS	3.7e-129	3.7e-129	-10.8923	2.85318	1.90962	-1.71858	6.51335	0.054385	-6.91431	-0.0568944	-4.31815	-7.07666	-1.21569	-2.35725	10.8923		TC10707	similar to PRF|NP_173489.1|15217992|NP_173489 protein kinase family protein {Arabidopsis thaliana}, partial (50%)	GO:0004672;GO:0016301;GO:0008372	At1g20650.1	68414.m02587 protein kinase family protein contains Pfam domain PF00069: Protein kinase domain	7.2e-130	7.2e-130	28.5501	-3.75537	-5.57584	-2.78035	-1.62375	6.38922	8.01189	-7.7614	9.93651	4.65197	6.52708	11.896	28.5501
TC8057	similar to UP|O65854_TOBAC (O65854) Glucose-6-phosphate dehydrogenase, partial (96%)	GO:0006010;GO:0006098;GO:0005975;GO:0016491;GO:0006749;GO:0004345;GO:0006006;GO:0009051;GO:0045767;GO:0008372;GO:0005829	At5g40760.1	68418.m04946 glucose-6-phosphate 1-dehydrogenase / G6PD (ACG12) idential to glucose-6-phosphate 1-dehydrogenase (acg12) [Arabidopsis thaliana] GI:5732197	3.4e-233	3.4e-233	-10.8024	0.48188	1.57987	1.3723	5.3269	-1.33929	-4.60502	2.35257	-6.49919	-3.82058	-1.31941	-1.76133	10.8024		TC12594	weakly similar to PIR|T02410|T02410 cellulase At2g44540 {Arabidopsis thaliana} , partial (64%)	GO:0004553	At2g44550.1	68415.m05543 glycosyl hydrolase family 9 protein	1.1e-156	1.1e-156	28.4319	-7.01647	-5.41436	-1.62902	0.853707	4.72743	8.44515	-5.5978	4.21023	7.09764	9.208	18.3122	28.4319
DR950076	similar to PRF|NP_175929.2|30695918|NP_175929 acyl-activating enzyme 18 (AAE18) {Arabidopsis thaliana}, partial (21%)	NA	At1g55320.1	68414.m06319 acyl-activating enzyme 18 (AAE18) nearly identical to acyl-activating enzyme 18 [Arabidopsis thaliana] GI:29893268; similar to acetyl-CoA synthetase [SP|P27095] from Methanothrix soehngenii; con-TRUNCATED-	2.4e-33	2.4e-33	-10.7235	1.99196	3.2039	2.39038	-0.664594	-4.73162	-2.5087	5.23259	-4.03869	-1.23708	-3.2124	-7.60173	10.7235		TC12130	similar to UP|DRP1C_ARATH (Q8LF21) Dynamin-related protein 1C (Dynamin-like protein C) (Dynamin-like protein 5) (Dynamin-like protein DLP1), partial (98%)	GO:0000004;GO:0016192;GO:0005525;GO:0003924;GO:0008372	At1g14830.1	68414.m01774 dynamin-like protein C (DL1C) nearly identical to dynamin-like protein C [Arabidopsis thaliana] GI:19569772	7.9e-282	7.9e-282	28.3981	-2.22736	-4.03057	-6.25024	-2.60212	6.47616	8.4891	-7.51575	11.005	3.772	5.99865	10.5022	28.3981
TC9905	similar to PRF|NP_850462.2|42570437|NP_850462 expressed protein {Arabidopsis thaliana}, partial (27%)	NA	At2g46915.1	68415.m05859 expressed protein and genscan	5.6e-75	5.6e-75	-10.7061	1.67867	4.11653	4.16921	-1.66495	-5.45689	-3.48776	6.71705	-5.42019	0.0129172	-4.40333	-9.28232	10.7061		TC11701	weakly similar to PRF|NP_191055.1|15233136|NP_191055 patatin-related {Arabidopsis thaliana}, partial (61%)	GO:0045735	At3g54950.1	68416.m06092 patatin-related low similarity to patatin [GI:169500][Solanum tuberosum]; contains Patatin domain PF01734	1.1e-96	1.1e-96	28.3342	-4.04459	-4.4477	-3.7203	-0.283848	5.61122	9.5743	-6.36778	6.40723	5.48095	8.25271	15.526	28.3342
DR942782	similar to UP|Q9M6S0_9ROSI (Q9M6S0) Pumilio domain-containing protein PPD1, partial (18%)	NA	At3g20250.1	68416.m02565 pumilio/Puf RNA-binding domain-containing protein contains Pfam profile: PF00806 Pumilio-family RNA binding domains (aka PUM-HD, Pumilio homology domain) (8 copies at C-terminus)	8.9e-84	8.9e-84	-10.6383	8.34374	-0.651982	1.4557	0.301868	-0.537817	-4.90561	0.417547	-0.80577	-4.71987	-6.43532	-5.3944	10.6383		TC17124	similar to PRF|NP_177152.2|30697951|NP_177152 pectinesterase family protein {Arabidopsis thaliana}, partial (33%)	NA	At1g69940.1	68414.m08049 pectinesterase family protein contains Pfam profile: PF01095 pectinesterase	6.8e-86	6.8e-86	28.2898	-10.2917	-4.71597	-0.953456	0.720916	4.56126	6.57903	-4.74881	3.57585	6.69012	9.21359	17.4355	28.2898
TC19697	similar to PRF|NP_194257.1|15234984|NP_194257 pentatricopeptide (PPR) repeat-containing protein {Arabidopsis thaliana}, partial (20%)	NA	At4g25270.1	68417.m03635 pentatricopeptide (PPR) repeat-containing protein contains INTERPRO:IPR002885 PPR repeats	1.3e-76	1.3e-76	-10.6132	5.30329	2.64418	0.467391	-0.884585	-1.98644	-3.62355	2.62958	-1.99095	-1.24043	-3.55803	-5.16499	10.6132		DR946748	weakly similar to UP|EXG2_YEAST (P52911) Glucan 1,3-beta-glucosidase 2 precursor (Exo-1,3-beta-glucanase 2) , partial (5%)	NA	At1g34160.1	68414.m04237 pentatricopeptide (PPR) repeat-containing protein contains Pfam profile PF01535: PPR repeat	0.3	0.26	28.1227	-4.65831	-3.81044	-2.65121	-1.14351	5.18937	7.42097	-5.31712	6.4167	3.78169	5.73505	11.276	28.1227
TC9222	similar to UP|Q40336_MEDSA (Q40336) Proline-rich cell wall protein, partial (46%)	NA	At4g15160.1	68417.m02327 protease inhibitor/seed storage/lipid transfer protein (LTP) family protein similar to SP|Q00451|PRF1_LYCES 36.4 kDa proline-rich protein Lycopersicon esculentum, proline-rich cell wall protein -TRUNCATED-	3.3e-70	3.3e-70	-10.6088	4.88371	0.820961	2.17628	-1.45713	-2.77098	-5.30399	2.49348	-0.924708	-4.5789	-5.15848	-6.81232	10.6088		DT766412	similar to UP|Q94C34_ARATH (Q94C34) AT4g39170/T22F8_70, partial (35%)	NA	At2g21540.1	68415.m02563 SEC14 cytosolic factor, putative / phosphoglyceride transfer protein, putative similar to phosphatidylinositol transfer-like protein IV (GI:14486707) [Lotus japonicus]; contains Pfam PF00650 : -TRUNCATED-	1.1e-85	1.1e-85	28.0836	-2.9506	-3.17174	-2.85442	-1.15701	4.40035	5.92293	-5.10009	7.53238	3.51133	4.89256	6.78359	28.0836
TC13375	similar to emb|X67144.1|LERYGTOM5 L.esculentum (rY mutant) GTOM5 mRNA for mutant phytoene synthase, partial (46%)	NA	At5g17230.1	68418.m02019 phytoene synthase (PSY) / geranylgeranyl-diphosphate geranylgeranyl transferase identical to GB:L25812; synonymous with geranylgeranyl-diphosphate geranylgeranyl transferase	3.2e-115	3.2e-115	-10.5953	1.9405	1.08861	5.32895	-0.388192	-4.48365	-4.23627	5.25917	-2.868	-0.675854	-5.49723	-5.959	10.5953		TC19589	similar to UP|Q5PXN9_SESPO (Q5PXN9) Salt tolerance protein, partial (78%)	GO:0009793;GO:0009269;GO:0005554;GO:0008372	At2g44060.1	68415.m05477 late embryogenesis abundant family protein / LEA family protein similar to ethylene-responsive late embryogenesis-like protein [Lycopersicon esculentum] GI:1684830; contains Pfam profile PF03168-TRUNCATED-	1.9e-113	1.9e-113	27.9531	-7.43401	-3.38728	-2.82036	-0.46733	5.04307	8.77839	-4.35337	5.50678	6.27963	5.70785	12.6889	27.9531
TC15403	similar to UP|PME3_CITSI (P83948) Pectinesterase-3 precursor (Pectin methylesterase 3) (PE 3) , partial (81%)	GO:0005576;GO:0009505;GO:0030599	At3g14310.1	68416.m01810 pectinesterase family protein contains Pfam profiles: PF01095 pectinesterase, PF04043 plant invertase/pectin methylesterase inhibitor ;similar to pectin methylesterase GB:Q42534 from [Arabidopsi-TRUNCATED-	2e-196	2e-196	-10.5416	3.39356	4.76261	0.553693	-1.53158	-3.11176	-2.13184	3.20108	-2.52078	-1.51103	-2.64059	-8.43297	10.5416		DR927291	similar to UP|Q9LHL3_ARATH (Q9LHL3) RNA-binding protein-like, partial (19%)	NA	At3g19090.1	68416.m02426 RNA-binding protein, putative similar to RNA-binding protein homolog GB:AAF00075 GI:6449448 from [Brassica napus]; contains InterPro entry IPR000504: RNA-binding region RNP-1 (RNA recognition mo-TRUNCATED-	6.6e-40	6.6e-40	27.9445	-3.0597	-2.70443	-3.39767	-1.47238	5.40625	6.84645	-5.65461	7.05652	3.57073	5.4362	8.90509	27.9445
TC18169	weakly similar to PRF|NP_566329.1|18398173|NP_566329 expressed protein {Arabidopsis thaliana}, partial (40%)	NA	At3g08600.1	68416.m00999 expressed protein	2.9e-62	2.9e-62	-10.5178	7.5564	1.0549	1.66716	-1.15092	-1.60973	-5.9424	2.13569	-0.874794	-2.97955	-4.80482	-6.96482	10.5178		TC15972	similar to PRF|NP_850638.1|30688566|NP_850638 zinc finger (DHHC type) family protein {Arabidopsis thaliana}, partial (45%)	NA	At3g26935.1	68416.m03371 zinc finger (DHHC type) family protein contains Pfam profile PF01529: DHHC zinc finger domain	6.6e-104	6.6e-104	27.8422	-0.884534	-3.76895	-4.64814	-4.46707	6.94602	5.26452	-6.27365	14.2026	4.36527	3.83736	8.87032	27.8422
TC10370	weakly similar to UP|Q589Y2_TOBAC (Q589Y2) Glycosyltransferase NTGT5a, partial (39%)	GO:0016757	At1g22340.1	68414.m02795 UDP-glucoronosyl/UDP-glucosyl transferase family protein contains Pfam profile: PF00201 UDP-glucoronosyl and UDP-glucosyl transferase; similar to UDP-glucose glucosyltransferase GI:3928543 from -TRUNCATED-	5.4e-93	5.4e-93	-10.485	-1.78319	5.70189	3.69424	2.7041	-7.14195	-3.04291	7.39707	-10.0254	-0.319037	-1.21898	-5.36997	10.485		TC17668	similar to UP|Q9FL47_ARATH (Q9FL47) Gb|AAD20416.1 (Expressed protein), partial (73%)	GO:0000004;GO:0005554;GO:0008372	At5g06990.1	68418.m00792 expressed protein contains Pfam profile PF04759: Protein of unknown function, DUF617; expression supported by MPSS	8.3e-81	8.3e-81	27.5817	-5.41723	-3.62993	-1.04616	-0.817954	4.57606	6.27932	-3.83004	3.23003	4.24403	6.29903	11.7402	27.5817
DT741156	similar to UP|Q84T10_ORYSA (Q84T10) Unknow protein, partial (3%)	NA	At4g13750.1	68417.m02134 expressed protein	2.8e-37	2.8e-37	-10.4808	6.84872	2.18268	0.998443	-0.804008	-2.33467	-2.96473	2.77498	-1.43643	-4.26061	-7.20203	-5.18848	10.4808		TC18256	similar to UP|Q9T0A0_ARATH (Q9T0A0) Acyl-CoA synthetase-like protein (AT4g23850/T32A16_20) (Long chain acyl-CoA synthetase 4) , partial (46%)	NA	At4g23850.1	68417.m03429 long-chain-fatty-acid--CoA ligase / long-chain acyl-CoA synthetase nearly identical to acyl-CoA synthetase (MF7P) from Brassica napus [gi:1617270]	6.1e-140	6.1e-140	27.5148	-0.703557	-4.44021	-5.78118	-1.18763	6.49621	6.88824	-6.65624	9.84931	1.48623	4.88224	11.3612	27.5148
TC14256	weakly similar to UP|Q56XV8_ARATH (Q56XV8) Chaperonin 60 alpha chain-like protein, partial (92%)	GO:0003754;GO:0005739	At5g18820.1	68418.m02236 chaperonin, putative similar to SWISS-PROT:P08926- RuBisCO subunit binding-protein alpha subunit, chloroplast precursor (60 kDa chaperonin alpha subunit, CPN-60 alpha)[Pisum sativum]; contains P-TRUNCATED-	8.9e-191	8.9e-191	-10.4773	5.91666	7.04727	2.20089	-6.52301	-6.09576	-1.66024	7.57475	-1.56891	-0.0865853	-7.97513	-10.085	10.4773		TC11305	similar to PRF|NP_189972.2|30691701|NP_189972 glycosyl hydrolase family 9 protein {Arabidopsis thaliana}, partial (87%)	GO:0004553	At3g43860.1	68416.m04692 glycosyl hydrolase family 9 protein similar to cellulase GI:575404 from [Sambucus nigra].	2.9e-188	2.9e-188	27.3603	-8.73359	-4.92623	-1.13224	1.27433	5.01251	8.2837	-5.4583	4.0201	7.02113	8.87721	15.1342	27.3603
TC9221	similar to UP|Q40336_MEDSA (Q40336) Proline-rich cell wall protein, partial (53%)	NA	At4g15160.1	68417.m02327 protease inhibitor/seed storage/lipid transfer protein (LTP) family protein similar to SP|Q00451|PRF1_LYCES 36.4 kDa proline-rich protein Lycopersicon esculentum, proline-rich cell wall protein -TRUNCATED-	1.6e-77	1.6e-77	-10.3289	7.92049	1.36314	1.51941	-0.99929	-2.52475	-3.49985	2.44935	-0.761502	-5.08107	-8.00972	-10.0501	10.3289		TC18791	weakly similar to UP|Q76G23_ARACO (Q76G23) Anthocyanin 3-O-galactosyltransferase, partial (50%)	NA	At5g17050.1	68418.m01998 UDP-glucoronosyl/UDP-glucosyl transferase family protein similar to UDP glucose:flavonoid 3-o-glucosyltransferase, Vitis vinifera, EMBL:AF000372	5.6e-114	5.6e-114	27.2051	-5.8411	-3.91749	-2.96901	-1.49593	5.4273	7.00295	-4.53587	6.22893	5.66043	7.18541	11.7395	27.2051
TC17956	homologue to UP|PSAD_SPIOL (P12353) Photosystem I reaction center subunit II, chloroplast precursor (Photosystem I 20 kDa subunit) (PSI-D), partial (74%)	GO:0015979;GO:0005554;GO:0009538	At1g03130.1	68414.m00290 photosystem I reaction center subunit II, chloroplast, putative / photosystem I 20 kDa subunit, putative / PSI-D, putative (PSAD2) similar to SP|P12353 Photosystem I reaction center subunit II, -TRUNCATED-	8.8e-77	8.8e-77	-10.2854	6.8617	-0.379047	3.88613	-1.77371	-2.39569	-7.12631	2.45695	-0.865024	-3.26712	-9.08951	-5.18031	10.2854		TC9810	similar to UP|Q8RZA2_ORYSA (Q8RZA2) Zinc finger protein-like, partial (78%)	GO:0005886;GO:0003677;GO:0006886;GO:0008060;GO:0005543;GO:0005794;GO:0005634;GO:0005554	At3g07940.1	68416.m00971 zinc finger and C2 domain protein, putative similar to zinc finger and C2 domain protein GI:9957238 from [Arabidopsis thaliana];contains Pfam profile: PF01412 Putative GTP-ase activating protein-TRUNCATED-	5.6e-75	5.6e-75	27.0198	-3.40579	-6.32997	-3.03896	-1.45434	8.82119	6.11798	-8.22361	10.1322	4.46629	5.01371	11.1209	27.0198
TC8284	similar to UP|Q6SS00_ANTMA (Q6SS00) YABBY-like transcription factor GRAMINIFOLIA, partial (73%)	GO:0009944;GO:0005634;GO:0003700	At2g45190.1	68415.m05627 axial regulator YABBY1 (YABBY1) / abnormal floral organs protein (AFO) / filamentous flower protein (FIL) identical to YABBY1 [Arabidopsis thaliana] GI:4928749, abnormal floral organs protein (A-TRUNCATED-	3e-67	3e-67	-10.2631	3.36065	5.05368	0.225033	2.96025	-3.32285	-5.34362	4.28724	-6.93513	-6.00656	-3.35169	-6.95785	10.2631		TC16156	similar to UP|Q9SU24_ARATH (Q9SU24) Origin recognition complex subunit 1-like protein (Origin recognition complex 1b protein), partial (47%)	NA	At4g14700.1	68417.m02259 replication control protein, putative similar to origin recognition complex subunit 1 (Replication control protein 1) [Homo sapiens] SWISS-PROT:Q13415	1.9e-170	1.9e-170	26.6418	-2.86257	-2.71385	-3.30152	-2.91875	5.50008	7.02353	-4.86081	6.77241	5.7906	5.64225	5.12383	26.6418
TC9741	similar to UP|PNAA_PRUDU (P81898) Peptide-N4-(N-acetyl-beta-glucosaminyl)asparagine amidase A (PNGase A) (Glycopeptide N-glycosidase) (N-glycanase) [Contains: Peptide-N4-(N-acetyl-beta-glucosaminyl)asparagine amidase A light chain (PNGase A small chain) , partial (72%)	GO:0005554	At3g14920.1	68416.m01886 expressed protein	3.2e-166	3.2e-166	-10.2088	8.4788	2.04343	-1.33939	0.433627	-0.302292	-5.11044	0.213135	-0.933528	-4.78801	-4.51683	-5.97685	10.2088		TC12555	similar to UP|Q6NM29_ARATH (Q6NM29) At2g15730, partial (80%)	GO:0000004;GO:0005554;GO:0008372	At4g34420.1	68417.m04889 expressed protein ; expression supported by MPSS	4.1e-127	4.1e-127	26.4221	-0.464958	-4.08295	-4.87049	-2.06993	5.99438	7.97017	-5.71298	11.9164	3.2991	4.59054	8.92401	26.4221
TC8613	weakly similar to UP|Q8GTM1_TORRU (Q8GTM1) WD40, partial (72%)	GO:0000004;GO:0000166;GO:0008372	At2g19540.1	68415.m02283 transducin family protein / WD-40 repeat family protein contains WD-40 repeats (PF00400); similar to Glutamate-rich WD repeat protein (GRWD) (SP:Q9BQ67)[Homo sapiens]	1.3e-183	1.3e-183	-10.175	10.0465	2.73308	-0.665147	-2.85021	-1.66502	-3.57601	1.82356	-0.0506022	-2.35277	-4.84075	-10.1155	10.175		TC14639	similar to PRF|NP_564467.2|30693281|NP_564467 expressed protein {Arabidopsis thaliana}, partial (98%)	GO:0000004;GO:0005554;GO:0008372	At1g36050.1	68414.m04479 expressed protein	8.5e-182	8.5e-182	26.2633	-4.19936	-3.90047	-2.15492	-1.92202	4.74171	6.24301	-5.41388	7.94203	6.09371	5.60003	9.48421	26.2633
DR949706	weakly similar to UP|Q9LZI9_ARATH (Q9LZI9) Glutathione transferase III-like protein, partial (89%)	NA	At3g62760.1	68416.m07050 glutathione S-transferase, putative Glutathione transferase III(b) - Zea mays, EMBL:AJ010296	1.7e-66	1.7e-66	-10.1586	6.37859	-1.72512	0.740723	1.31507	0.578916	-7.14442	-0.666761	-0.334024	-6.37063	-8.95606	-5.33925	10.1586		TC12929	similar to UP|Q67N18_SYMTH (Q67N18) PTS system mannose/fructose-specific IIA component, partial (12%)	NA	At5g27990.1	68418.m03371 expressed protein predicted proteins, Saccharomyces cerevisiae and Schizosaccharomyces pombe	1.6e-11	1.6e-11	26.2418	-6.11247	-4.53138	-2.55721	-1.50458	5.32199	8.00471	-5.18316	6.11567	5.86389	6.84815	10.2022	26.2418
TC9918	similar to PRF|NP_850528.1|30680069|NP_850528 protein arginine N-methyltransferase family protein {Arabidopsis thaliana}, partial (70%)	GO:0008168	At3g06930.1	68416.m00822 protein arginine N-methyltransferase family protein similar to protein arginine methyltransferase [Mus musculus] GI:5257221	9.8e-197	9.8e-197	-10.102	6.37314	2.40727	-2.0935	-1.67946	-0.873262	-4.40718	0.665804	0.225606	-3.86928	-5.4292	-5.077	10.102		TC16409	NA	NA	At3g53040.1	68416.m05846 late embryogenesis abundant protein, putative / LEA protein, putative similar to LEA protein in group 3 [Arabidopsis thaliana] GI:1526424; contains Pfam profile PF02987: Late embryogenesis abund-TRUNCATED-	7.3e-19	7.3e-19	26.1476	-4.96046	-5.36629	-1.17605	-1.88674	6.12689	6.85462	-6.37315	8.18511	4.57452	4.34679	9.22128	26.1476
TC15589	similar to UP|Q9AWG7_MEDTR (Q9AWG7) Zinc transporter, partial (69%)	NA	At5g59520.1	68418.m07459 zinc transporter (ZIP2) identical to zinc transporter ZIP2 [Arabidopsis thaliana] gi|3252868|gb|AAC24198; member of the Zinc (Zn2+)-Iron (Fe2+) permease (ZIP) family, PMID:11500563	4.3e-90	4.3e-90	-10.0257	4.02448	1.12827	1.06387	-0.24618	-1.16648	-3.35104	1.93764	-1.64626	-3.81666	-2.04811	-6.6787	10.0257		TC16094	similar to PRF|NP_201207.2|30697938|NP_201207 expressed protein {Arabidopsis thaliana}, partial (73%)	GO:0000004;GO:0008372;GO:0005554	At5g20680.1	68418.m02456 expressed protein predicted proteins, Arabidopsis thaliana	4.1e-145	4.1e-145	25.8622	-2.95051	-5.22052	-4.18384	-1.6122	8.20929	7.45044	-7.71095	10.4884	3.40721	5.82007	9.99623	25.8622
TC16308	similar to UP|Q8MFR8_9ROSI (Q8MFR8) Plastidic ATP/ADP transporter (Fragment), partial (46%)	NA	At1g80300.1	68414.m09401 chloroplast ADP, ATP carrier protein 1 / ADP, ATP translocase 1 / adenine nucleotide translocase 1 (AATP1) identical to SP|Q39002 Chloroplast ADP,ATP carrier protein 1, chloroplast precursor (AD-TRUNCATED-	8.7e-125	8.7e-125	-9.98965	2.31401	2.64999	-0.0769228	0.561895	-1.78543	-3.86409	1.3999	-1.40636	-3.87937	-3.92732	-6.10444	9.98965		TC11788	similar to UP|Q9STE9_ARATH (Q9STE9) Serine/threonine kinase-like protein, partial (22%)	NA	At3g46750.1	68416.m05075 hypothetical protein	1e-36	1e-36	25.8254	-6.08149	-5.25404	-2.61482	-1.09417	5.93819	6.7241	-6.18826	6.05354	4.60782	5.95913	14.4577	25.8254
DR925591	similar to PRF|NP_199684.1|15239693|NP_199684 pentatricopeptide (PPR) repeat-containing protein {Arabidopsis thaliana}, partial (37%)	NA	At5g48730.1	68418.m06031 pentatricopeptide (PPR) repeat-containing protein contains Pfam profile PF01535: PPR repeat	1.3e-77	1.3e-77	-9.98086	0.312428	4.86379	2.39505	-0.990685	-8.82981	-1.80439	8.11787	-4.56153	0.468267	-1.8748	-5.92632	9.98086		TC13835	similar to UP|EXPA4_ARATH (O48818) Alpha-expansin 4 precursor (AtEXPA4) (At-EXP4) (AtEx4) (Ath-ExpAlpha-1.6), partial (88%)	GO:0009831;GO:0009826;GO:0009828;GO:0005554	At3g55500.1	68416.m06163 expansin, putative (EXP16) similar to expansin GI:2828241 from [Brassica napus]; alpha-expansin gene family, PMID:11641069	1.4e-93	1.4e-93	25.3695	-8.38736	-5.83886	-1.46685	0.622636	5.96242	6.52643	-5.25679	4.99805	5.88506	6.96651	15.953	25.3695
TC15361	weakly similar to PRF|NP_568564.1|18421863|NP_568564 expressed protein {Arabidopsis thaliana}, partial (91%)	GO:0000004;GO:0005739;GO:0005554	At5g39410.1	68418.m04774 expressed protein	1.6e-162	1.6e-162	-9.97557	7.628	2.13239	1.39141	-1.70308	-3.02376	-3.97426	3.29923	-1.09887	-3.82646	-4.71305	-3.28761	9.97557		TC16686	similar to PRF|NP_197392.2|30687061|NP_197392 protein kinase family protein {Arabidopsis thaliana}, partial (52%)	GO:0005737;GO:0016301;GO:0005634;GO:0008372	At5g18910.1	68418.m02246 protein kinase family protein contains protein kinase domain, Pfam:PF00069	1.6e-128	1.6e-128	25.2485	0.687585	-7.98876	-5.44026	-3.38939	11.0634	6.40851	-11.4612	18.6856	2.13523	4.19234	8.42219	25.2485
TC8282	similar to PRF|NP_974579.1|42572965|NP_974579 expressed protein {Arabidopsis thaliana}, partial (28%)	NA	At4g20020.1	68417.m02931 expressed protein	1.6e-61	1.6e-61	-9.95842	9.05903	2.08424	1.77183	-3.26421	-3.18858	-4.65402	1.81831	-0.399453	-1.20718	-8.30445	-9.43749	9.95842		TC19037	similar to PIR|G96638|G96638 protein T1F9.22 [imported] {Arabidopsis thaliana}, partial (97%)	GO:0005886;GO:0006886;GO:0005486;GO:0006944	At1g61290.1	68414.m06908 syntaxin, putative (SYP124) similar to syntaxin-related protein Nt-syr1 GI:4206787 from [Nicotiana tabacum]	9.3e-121	9.3e-121	25.1988	-8.38179	-5.29776	-1.168	0.653207	5.54298	6.97845	-5.93598	4.30252	5.65002	7.17807	16.2162	25.1988
TC14753	weakly similar to PIR|T48643|T48643 cinnamoyl CoA reductase-like protein {Arabidopsis thaliana}, partial (56%)	GO:0016621;GO:0009809	At5g14700.1	68418.m01723 cinnamoyl-CoA reductase-related similar to cinnamoyl-CoA reductase from Pinus taeda [GI:17978649], Saccharum officinarum [GI:3341511]	2.2e-89	2.2e-89	-9.92164	-2.23846	6.94201	-1.00706	5.48847	-4.19893	-1.05803	3.30458	-9.77694	-1.99557	2.54323	-1.76331	9.92164		DR923116	similar to GB|AAG28894.1|11072015|AC008113 F12A21.22 {Arabidopsis thaliana}, partial (22%)	NA	At1g67640.1	68414.m07716 lysine and histidine specific transporter, putative similar to lysine and histidine specific transporter GB:AAC49885 GI:2576361 (Arabidopsis thaliana); contains Pfam profile PF01490: Transmembra-TRUNCATED-	1.4e-37	1.4e-37	25.1527	-4.98344	-2.26187	-2.71963	-0.295479	3.61684	7.88891	-3.37089	3.15913	4.67688	7.08724	11.3536	25.1527
TC14581	similar to PRF|NP_188637.2|30685597|NP_188637 protein arginine N-methyltransferase family protein {Arabidopsis thaliana}, partial (74%)	GO:0008168	At3g20020.1	68416.m02533 protein arginine N-methyltransferase family protein similar to SP|Q96LA8 Protein arginine N-methyltransferase 6 (EC 2.1.1.-) {Homo sapiens}	1.1e-156	1.1e-156	-9.80515	4.82905	0.961882	-1.51641	1.50418	0.429961	-5.96087	-0.235669	-0.705575	-4.88459	-2.51654	-4.03197	9.80515		TC8676	weakly similar to UP|Q947H5_TOBAC (Q947H5) Non-cell-autonomous protein pathway1, partial (91%)	GO:0006012	At5g15140.1	68418.m01774 aldose 1-epimerase family protein similar to SP|P05149 Aldose 1-epimerase precursor (EC 5.1.3.3) (Mutarotase) from Acinetobacter calcoaceticus; contains Pfam profile PF01263 Aldose 1-epimerase -TRUNCATED-	5.8e-112	5.8e-112	24.7146	-1.62062	-8.78202	-2.76892	-1.25907	9.41236	3.76797	-8.42924	8.56369	2.19657	3.33645	10.668	24.7146
TC19230	NA	NA	At2g39920.1	68415.m04906 acid phosphatase class B family protein weak similarity to pod storage protein [Phaseolus vulgaris GI:2627233 SP|P10743 STEM 31 kDa glycoprotein precursor (Vegetative storage protein B) {Glycine-TRUNCATED-	1.3e-43	1.3e-43	-9.8007	-2.06453	-0.601259	3.64205	3.74558	-1.08133	-7.19374	2.33844	-7.15201	-3.23062	-1.3219	-0.906293	9.8007		TC18498	weakly similar to PRF|NP_568318.1|18417760|NP_568318 GDSL-motif lipase/hydrolase family protein {Arabidopsis thaliana}, partial (39%)	NA	At5g15720.1	68418.m01838 GDSL-motif lipase/hydrolase family protein similar to family II lipase EXL3 (GI:15054386) and EXL2 (GI:15054384) [Arabidopsis thaliana]; contains Pfam profile PF00657: Lipase/Acylhydrolase with -TRUNCATED-	1.8e-76	1.8e-76	24.7121	-0.611037	-6.04191	-5.44737	-0.764558	9.6495	5.57236	-10.7787	12.1168	1.04284	5.62158	9.78935	24.7121
TC9115	similar to UP|S17P_SPIOL (O20252) Sedoheptulose-1,7-bisphosphatase, chloroplast precursor (Sedoheptulose-bisphosphatase) (SBPASE) (SED(1,7)P2ASE) , partial (91%)	GO:0005975;GO:0009507;GO:0019252;GO:0019253;GO:0005986;GO:0016051;GO:0042578	At3g55800.1	68416.m06200 sedoheptulose-1,7-bisphosphatase, chloroplast / sedoheptulose-bisphosphatase identical to SP|P46283 Sedoheptulose-1,7-bisphosphatase, chloroplast precursor (EC 3.1.3.37) (Sedoheptulose-bisphosph-TRUNCATED-	4.1e-166	4.1e-166	-9.71852	-0.587085	4.3157	3.58595	-0.0507252	-5.92216	-3.09128	8.36619	-6.8418	0.517754	-2.29531	-6.93249	9.71852		TC13311	weakly similar to PRF|NP_194094.1|15236556|NP_194094 reticulon family protein (RTNLB1) {Arabidopsis thaliana}, partial (47%)	NA	At4g23630.1	68417.m03403 reticulon family protein (RTNLB1) weak similarity to Nogo-C protein [Rattus norvegicus] GI:6822251; contains Pfam profile PF02453: Reticulon	6.6e-69	6.6e-69	24.6845	-5.96622	-5.00513	-2.38313	-0.804327	6.32802	8.31717	-5.71332	5.85055	5.14674	6.54637	14.1432	24.6845
TC14597	similar to UP|Q9SBQ0_PETHY (Q9SBQ0) Floral binding protein 26, partial (87%)	GO:0009911;GO:0003677;GO:0003700	At1g69120.1	68414.m07909 floral homeotic protein APETALA1 (AP1) / agamous-like MADS box protein (AGL7) identical to SP|P35631 Floral homeotic protein APETALA1 (AGL7 protein) {Arabidopsis thaliana}	5.6e-75	5.6e-75	-9.69342	2.91006	1.89316	5.33346	-1.31456	-4.13709	-5.75012	5.05708	-3.49346	-0.835756	-2.15707	-6.98021	9.69342		TC17156	similar to UP|Q709M1_TOBAC (Q709M1) Protein kinase 1, partial (86%)	GO:0004672;GO:0016301;GO:0008372	At2g41970.1	68415.m05192 protein kinase, putative similar to Pto kinase interactor 1 (serine/threonine protein kinase) [Lycopersicon esculentum] gi|3668069|gb|AAC61805	1.1e-156	1.1e-156	24.57	-7.5805	-5.50497	-1.85362	0.0508008	6.39633	5.60669	-6.10257	6.35849	5.75218	7.94187	15.8179	24.57
TC15094	homologue to UP|CRD1_GOSHI (Q6SJV8) Magnesium-protoporphyrin IX monomethyl ester [oxidative] cyclase, chloroplast precursor (Mg-protoporphyrin IX monomethyl ester oxidative cyclase) , partial (90%)	NA	At3g56940.1	68416.m06334 dicarboxylate diiron protein, putative (Crd1) similar to leucine-containing zipper protein At103 GP:6911864; contains Pfam profile PF05447: Copper response defect 1 (CRD1)	4.3e-187	4.3e-187	-9.69023	9.42116	-1.04443	-0.39003	-0.273116	1.31941	-6.13332	-0.728689	1.27794	-7.99417	-9.00585	-7.4918	9.69023		TC16091	similar to UP|Q9SE92_MAIZE (Q9SE92) Adenosine-5'-phosphosulfate kinase (Fragment) , partial (69%)	GO:0016772;GO:0005524;GO:0000103;GO:0016301;GO:0008372	At2g14750.1	68415.m01666 adenylylsulfate kinase 1 (AKN1) identical to adenylylsulfate kinase 1, chloroplast precursor (APS kinase, Adenosine-5'phosphosulfate kinase, ATP adenosine-5'- phosphosulfate 3'-phosphotransferas-TRUNCATED-	4.2e-86	4.2e-86	24.3072	-7.14607	-2.23891	-1.86782	-1.14992	3.71901	8.50405	-3.41238	4.88148	6.88498	7.96213	8.24168	24.3072
TC13175	similar to UP|Q6T7F3_TOBAC (Q6T7F3) 5-phosphoribosyl-1-pyrophosphate amidotransferase , partial (32%)	NA	At2g16570.1	68415.m01900 amidophosphoribosyltransferase / glutamine phosphoribosylpyrophosphate amidotransferase / phosphoribosyldiphosphate 5-amidotransferase identical to amidophosphoribosyltransferase [Arabidopsis th-TRUNCATED-	3.2e-79	3.2e-79	-9.65914	7.53842	5.221	-0.313777	-3.54091	-2.89436	-2.10826	3.56509	-0.523239	-2.53201	-5.23183	-7.55366	9.65914		TC10917	weakly similar to UP|Q6ZIM5_ORYSA (Q6ZIM5) Glycerophosphoryl diester phosphodiesterase 2-like protein, partial (20%)	NA	At5g58170.1	68418.m07281 glycerophosphoryl diester phosphodiesterase family protein contains Pfam PF03009 : Glycerophosphoryl diester phosphodiesterase family; similar to Glycerophosphoryl diester phosphodiesterase prec-TRUNCATED-	2.9e-71	2.9e-71	24.3058	-6.8143	-6.14389	-1.04801	0.738745	5.52906	7.00232	-5.72838	4.51084	5.02544	7.05048	15.1817	24.3058
TC8325	similar to PRF|NP_196800.2|30684197|NP_196800 expressed protein {Arabidopsis thaliana}, partial (22%)	NA	At5g12960.1	68418.m01486 expressed protein	1.3e-144	1.3e-144	-9.53765	3.05161	3.50359	-4.58668	6.66666	1.07695	-3.74379	-0.847939	-4.57409	-5.33765	1.05102	-0.810309	9.53765		TC9614	homologue to UP|Q59IV5_MESCR (Q59IV5) Plastidic phosphate translocator-like protein2, complete	GO:0008514	At5g05820.1	68418.m00640 phosphate translocator-related low similarity to phosphoenolpyruvate/phosphate translocator precursor [Mesembryanthemum crystallinum] GI:9295275, glucose-6-phosphate/phosphate-translocator precu-TRUNCATED-	2e-143	2e-143	24.2934	-4.20142	-3.71415	-3.13243	-2.55544	4.96096	8.9525	-4.78548	6.72063	5.35261	4.90916	10.2627	24.2934
TC9974	similar to UP|P93799_VITVI (P93799) Dihydroflavonol 4-reductase , partial (97%)	GO:0009718;GO:0045552	At5g42800.1	68418.m05213 dihydroflavonol 4-reductase (dihydrokaempferol 4-reductase) (DFR) nearly identical to GI:166686	1.4e-135	1.4e-135	-14.7058	-4.89088	9.11911	12.8022	-2.69699	-19.5858	-1.9815	29.131	-18.3638	6.63468	-3.99837	-13.3488	0		DR946348	weakly similar to UP|Q58P71_ARATH (Q58P71) Cation/H+ exchanger (Fragment), partial (10%)	NA	At1g06970.1	68414.m00742 cation/hydrogen exchanger, putative (CHX14) monovalent cation:proton antiporter family 2 (CPA2) member, PMID:11500563	2.3e-43	2.3e-43	24.1029	-4.4863	-3.44884	-2.26244	-1.18341	5.11181	6.66989	-4.8681	4.15202	4.41617	4.81373	10.445	24.1029
DR940663	similar to UP|Q6L796_IPOPU (Q6L796) BHLH transcription activator Ivory seed, partial (22%)	NA	At1g63650.1	68414.m07201 basic helix-loop-helix (bHLH) family protein similar to bHLH transcription factor (JAF13) GB:AAC39455 [Petunia x hybrida]; contains Pfam profile: PF00010 Helix-loop-helix DNA-binding domain -TRUNCATED-	6.8e-26	6.8e-26	-14.5298	2.37547	3.97135	7.45323	-2.66063	-8.51357	-4.59022	9.23132	-5.47078	0.389121	-7.80249	-15.1413	0		TC9838	similar to GB|AAO64822.1|29028886|BT005887 At1g77210 {Arabidopsis thaliana}, partial (88%)	GO:0005351;GO:0015144;GO:0016020	At1g77210.1	68414.m08993 sugar transporter, putative similar to monosaccharide transporter PaMst-1 [Picea abies] GI:2258137, sugar carrier protein GI:169735 from [Ricinus communis], glucose transporter [Saccharum hybrid-TRUNCATED-	5.6e-201	5.6e-201	24.007	-9.88401	-5.41382	-1.22635	0.0747579	5.13246	6.7852	-4.66476	3.74215	7.70409	7.93519	13.2603	24.007
TC17722	similar to UP|Q5XQC7_ARATH (Q5XQC7) BON3, partial (74%)	GO:0010186;GO:0005544;GO:0019725	At1g08860.1	68414.m00987 copine, putative Similar to BONZAI1 [Arabidopsis thaliana] GI:15487382; contains Pfam profile PF00168: C2 domain	6.5e-168	6.5e-168	-14.1941	6.83798	2.46665	5.36189	-4.11621	-7.32447	-4.5889	7.05901	-3.25374	-1.83151	-11.1858	-16.994	0		TC9698	similar to PRF|NP_563632.2|30678177|NP_563632 acyl-CoA thioesterase family protein {Arabidopsis thaliana}, partial (86%)	GO:0016291;GO:0006637;GO:0030551;GO:0008372	At1g01710.1	68414.m00089 acyl-CoA thioesterase family protein contains Pfam profiles: PF02551 acyl-CoA thioesterase, PF00027 cyclic nucleotide-binding domain	5.2e-159	5.2e-159	23.926	-4.24357	-3.68044	-3.49768	-2.52024	3.35259	9.93756	-6.35357	9.18391	4.80582	5.21274	8.4367	23.926
TC9816	weakly similar to UP|Q69FA1_PHAVU (Q69FA1) Anthocyanin acyltransferase, partial (19%)	NA	At1g03940.1	68414.m00379 transferase family protein similar to anthocyanin 5-aromatic acyltransferase from Gentiana triflora GI:4185599, malonyl CoA:anthocyanin 5-O-glucoside-6'''-O-malonyltransferase from Perilla frute-TRUNCATED-	4.2e-70	4.2e-70	-13.5365	-6.40613	9.31291	13.5345	-2.89421	-33.5047	-1.42656	33.7341	-20.785	6.74952	-3.82715	-12.5834	0		TC18034	NA	NA	At1g09600.1	68414.m01077 protein kinase family protein contains Pfam domain, PF00069: Protein kinase domain	2.3e-18	2.3e-18	23.9095	-1.10313	-3.47965	-4.06063	-2.5685	6.91227	6.13531	-6.6971	10.4623	2.41808	3.90901	8.74997	23.9095
TC11409	weakly similar to PRF|NP_174585.1|15223391|NP_174585 MATE efflux family protein {Arabidopsis thaliana}, partial (58%)	GO:0015297;GO:0005215;GO:0016020	At5g17700.1	68418.m02074 MATE efflux family protein similar to ripening regulated protein DDTFR18 [Lycopersicon esculentum] GI:12231296; contains Pfam profile PF01554: Uncharacterized membrane protein family	1.7e-133	1.7e-133	-13.1139	13.2774	-0.393386	-0.261862	0.552843	0.604327	-10.0364	-0.52669	0.243791	-11.0454	-7.83621	-6.5683	0		TC18668	weakly similar to PRF|NP_192399.1|15234502|NP_192399 p21-rho-binding domain-containing protein {Arabidopsis thaliana}, partial (46%)	NA	At4g04900.1	68417.m00713 p21-rho-binding domain-containing protein contains Pfam PF00786: P21-Rho-binding domain	2.3e-24	2.3e-24	23.8987	-5.16079	-5.08643	-2.3564	-0.126846	8.45029	6.73242	-9.61995	9.52845	4.26413	6.31596	12.8847	23.8987
TC15315	NA	GO:0016021;GO:0008415;GO:0009913;GO:0008610;GO:0030497;GO:0009922;GO:0008372;GO:0000038;GO:0042335;GO:0012505	At2g26640.1	68415.m03196 beta-ketoacyl-CoA synthase, putative similar to beta-ketoacyl-CoA synthase [Simmondsia chinensis][GI:1045614]	8e-218	8e-218	-13.0321	-2.15199	5.95365	9.38176	-6.08069	-21.2574	-2.08003	16.1082	-10.0391	4.60128	-7.53663	-16.51	0		TC17800	similar to UP|Q8H0S2_ARATH (Q8H0S2) At4g23490/F16G20_190, partial (44%)	NA	At4g23490.1	68417.m03384 fringe-related protein + weak similarity to Fringe [Schistocerca gregaria](GI:6573138);Fringe encodes an extracellular protein that regulates Notch signalling.	1.6e-124	1.6e-124	23.8659	-3.20042	-3.43068	-2.89255	-2.22582	4.96042	7.00522	-4.83163	5.68764	5.08686	5.70879	7.00251	23.8659
TC8289	similar to UP|Q8W2E4_LACSA (Q8W2E4) Phenylalanine ammonia-lyase, partial (97%)	GO:0009699;GO:0045548;GO:0006952;GO:0009611	At2g37040.1	68415.m04544 phenylalanine ammonia-lyase 1 (PAL1) nearly identical to SP|P35510	0	0	-12.8837	-6.15195	-0.181123	4.95573	14.5732	-3.49844	-10.0769	4.2146	-15.4533	-3.1153	0.80587	0.960609	0		TC12699	weakly similar to UP|Q93XF3_MAIZE (Q93XF3) Kinesin heavy chain (Fragment), partial (19%)	NA	At2g21300.1	68415.m02535 kinesin motor family protein contains Pfam profile: kinesin motor domain PF00225	2.9e-54	2.9e-54	23.8052	-1.65796	-2.24534	-3.62124	-5.2107	5.52511	10.2507	-4.64066	11.0061	4.34064	4.16392	7.18801	23.8052
TC15041	similar to GB|BAB01768.1|9293865|AB022215 DEAD-Box RNA helicase-like protein {Arabidopsis thaliana}, partial (54%)	GO:0008026;GO:0005739	At3g22330.1	68416.m02820 DEAD box RNA helicase, putative similar to RNA helicases GI:3775995, GI:3775987 from [Arabidopsis thaliana]; contains Pfam profiles PF00270: DEAD/DEAH box helicase, PF00271: Helicase conserved C-TRUNCATED-	3.2e-145	3.2e-145	-12.8489	6.0921	4.82141	4.9494	-6.51137	-6.54496	-4.62907	7.71572	-1.99889	-0.299358	-9.43793	-15.0214	0		TC14363	similar to UP|CDK3_HUMAN (Q00526) Cell division protein kinase 3 , partial (33%)	NA	At3g48750.1	68416.m05324 cell division control protein 2 homolog A (CDC2A) identical to cell division control protein 2 homolog A [Arabidopsis thaliana] SWISS-PROT:P24100	1.1e-64	1.1e-64	23.7397	-2.17573	-6.13432	-4.10545	-2.3237	8.95228	7.11489	-8.81675	12.656	2.78075	4.87219	12.2787	23.7397
TC15086	weakly similar to UP|Q589Y1_TOBAC (Q589Y1) Glycosyltransferase NTGT5b, partial (53%)	NA	At1g22400.1	68414.m02801 UDP-glucoronosyl/UDP-glucosyl transferase family protein contains Pfam profile: PF00201 UDP-glucoronosyl and UDP-glucosyl transferase	1.4e-135	1.4e-135	-12.6402	5.48259	5.54248	7.24168	-9.76553	-12.7661	-2.7233	12.1587	-3.80053	2.97494	-9.87658	-29.6291	0		TC18654	weakly similar to GB|CAA46515.1|44415|MLPRAG proline-rich antigen {Mycobacterium leprae}, partial (14%)	NA	At4g35800.1	68417.m05087 DNA-directed RNA polymerase II largest subunit (RPB205) (RPII) (RPB1) nearly identical to P|P18616 DNA-directed RNA polymerase II largest subunit (EC 2.7.7.6) {Arabidopsis thaliana}	2.5e-18	2.5e-18	23.7257	-10.266	-4.88446	-0.969264	0.82127	4.83471	8.69424	-4.93097	3.98581	6.09145	7.82932	12.9754	23.7257
TC9733	weakly similar to UP|Q9ZTY8_9SOLN (Q9ZTY8) Glucose acyltransferase, partial (50%)	NA	At5g09640.1	68418.m01115 sinapoylglucose:choline sinapoyltransferase (SNG2) GC donor splice site at exon 11 and 13; TA donor splice site at exon 10; similar to serine carboxypeptidase I precursor (SP:P37890) [Oryza sati-TRUNCATED-	1.3e-116	1.3e-116	-12.1644	-5.16546	8.9983	12.1926	-3.02694	-23.4071	-1.43768	29.0494	-18.0449	8.22204	-3.94171	-14.1756	0		TC12952	similar to UP|Q9FLN8_ARATH (Q9FLN8) S-adenosyl-L-methionine:salicylic acid carboxyl methyltransferase-like protein, partial (86%)	GO:0000004;GO:0008757;GO:0008372	At5g55250.1	68418.m06886 S-adenosyl-L-methionine:carboxyl methyltransferase family protein similar to SAM:jasmonic acid carboxyl methyltransferase (JMT)[GI:13676829] and to SAM:benzoic acid carboxyl methyltransferase (B-TRUNCATED-	2.1e-153	2.1e-153	23.6322	-3.2663	-4.53502	-3.04399	-2.24811	6.92404	6.56453	-5.47672	7.20104	3.68027	5.53265	10.9487	23.6322
TC8216	similar to PRF|1908421A|445116|1908421A light-harvesting complex IIa protein. {Hordeum vulgare}, partial (96%)	GO:0015979;GO:0030076;GO:0016168	At3g08940.2	68416.m01042 chlorophyll A-B binding protein (LHCB4.2) contains Pfam profile: PF00504 chlorophyll A-B binding protein; identical to Lhcb4.2 protein GB:AAD28774 [Arabidopsis thaliana]	3.2e-127	3.2e-127	-12.1464	13.1234	-2.67751	1.27248	1.94019	1.37119	-14.7322	-1.52121	0.147358	-10.1221	-11.5746	-6.17417	0		DT768802	similar to PIR|H96681|H96681 protein F1E22.10 [imported] {Arabidopsis thaliana}, partial (30%)	NA	At1g65730.1	68414.m07460 oligopeptide transporter OPT family protein similar to iron-phytosiderophore transporter protein yellow stripe 1 [Zea mays] GI:10770865; contains Pfam profile PF03169: OPT oligopeptide transport-TRUNCATED-	2.2e-80	2.2e-80	23.4751	-5.20198	-3.76682	-2.20433	-0.402714	4.74475	6.25477	-5.34689	5.94193	4.09332	5.13685	11.5297	23.4751
TC9004	similar to UP|Q8GSM7_TOBAC (Q8GSM7) Hydroxycinnamoyl transferase, partial (91%)	GO:0016740;GO:0008372	At5g48930.1	68418.m06053 transferase family protein similar to anthranilate N-hydroxycinnamoyl/benzoyltransferase from Dianthus caryophyllus [GI:3288180, GI:2239091]; contains Pfam profile PF02458 transferase family -TRUNCATED-	1.7e-183	1.7e-183	-12.0938	-0.45004	4.68066	-5.50005	15.5581	0.594248	-3.92726	-0.707948	-10.7178	-7.90973	4.83457	0.675946	0		TC11766	UP|Q8SXG2_DROME (Q8SXG2) RH09582p (CG32711-PA), partial (15%)	NA	At5g17590.1	68418.m02063 prothymosin alpha-related contains weak similarity to Prothymosin alpha (Swiss-Prot:P06454) [Homo sapiens]	6e-12	6e-12	23.396	-5.28608	-4.17517	-2.08581	-1.67776	5.16618	6.70204	-6.14322	7.21109	5.22868	5.39827	10.2075	23.396
TC17534	weakly similar to UP|Q589Y3_TOBAC (Q589Y3) Glucosyltransferase NTGT4, partial (66%)	GO:0016757;GO:0016758;GO:0012505;GO:0008194	At2g36760.1	68415.m04509 UDP-glucoronosyl/UDP-glucosyl transferase family protein contains Pfam profile: PF00201 UDP-glucoronosyl and UDP-glucosyl transferase	7.9e-140	7.9e-140	-11.6729	3.07107	0.624718	12.6296	-4.44563	-9.4569	-4.41529	9.89559	-5.39699	0.814109	-10.3827	-12.7549	0		TC12641	weakly similar to PRF|NP_194807.1|15234853|NP_194807 expressed protein {Arabidopsis thaliana}, partial (10%)	NA	At2g24100.1	68415.m02879 expressed protein	6.7e-55	6.7e-55	23.3425	-6.86216	-3.83022	-2.73386	0.295941	5.85706	8.4996	-5.11386	3.3642	5.17107	5.9502	14.496	23.3425
TC18587	similar to UP|Q7FPQ4_HELTU (Q7FPQ4) Cytochrome P450, partial (62%)	NA	At4g37370.1	68417.m05292 cytochrome P450, putative similar to Cytochrome P450 91A1 (SP:Q9FG65 )[Arabidopsis thaliana]; cytochrome P450, Glycyrrhiza echinata, AB001379	8.2e-129	8.2e-129	-11.3854	3.50237	3.34621	6.8547	-4.38157	-8.80875	-5.20879	7.06607	-4.83061	0.521946	-7.12725	-11.5787	0		TC16180	similar to PRF|NP_850340.1|30688510|NP_850340 PQ-loop repeat family protein / transmembrane family protein {Arabidopsis thaliana}, partial (55%)	GO:0000004;GO:0005554;GO:0016020	At2g41050.1	68415.m05069 PQ-loop repeat family protein / transmembrane family protein similar to SP|Q10482 Seven transmembrane protein 1 {Schizosaccharomyces pombe}; contains Pfam profile PF04193: PQ loop repeat -TRUNCATED-	1.3e-57	1.3e-57	23.2711	-5.8523	-6.63829	-6.69101	1.66336	12.0404	6.55818	-9.11305	8.35909	2.9908	10.7027	18.8229	23.2711
TC10090	similar to UP|Q8VX11_LUPLU (Q8VX11) Diphosphonucleotide phosphatase 1 precursor, partial (96%)	GO:0004722;GO:0000004;GO:0005554;GO:0008372	At1g13750.1	68414.m01614 calcineurin-like phosphoesterase family protein contains Pfam profile: PF00149 calcineurin-like phosphoesterase	6.5e-263	6.5e-263	-11.3005	0.53578	0.644754	11.696	-0.431613	-7.07708	-8.01366	2.74507	-5.08902	-0.0721251	-7.99699	-2.42492	0		TC18855	similar to UP|Q9LZI2_ARATH (Q9LZI2) DTDP-glucose 4-6-dehydratase homolog D18 (At3g62830/F26K9_260), partial (84%)	GO:0000139;GO:0009225;GO:0000004;GO:0003824;GO:0048040;GO:0005554;GO:0008372;GO:0016020;GO:0042732	At3g62830.1	68416.m07059 NAD-dependent epimerase/dehydratase family protein similar to UDP-glucuronic acid decarboxylase Uxs1p from Filobasidiella neoformans GI:14318327; contains Pfam profile PF01370 NAD dependent epim-TRUNCATED-	1.9e-184	1.9e-184	23.1581	-6.32829	0.0544799	-0.330261	-5.19476	0.236509	9.29363	-0.231781	4.10845	10.7935	4.9134	5.72127	23.1581
TC18571	similar to UP|Q6PTC5_CITSI (Q6PTC5) Anthocyanidin synthase, partial (95%)	GO:0010023;GO:0045432;GO:0007033;GO:0008372	At4g22880.1	68417.m03304 leucoanthocyanidin dioxygenase, putative / anthocyanidin synthase, putative similar to SP|P51091 [Malus domestica]; contains PF03171 2OG-Fe(II) oxygenase superfamily	1.7e-146	1.7e-146	-11.2416	-7.68107	9.26445	13.3946	-1.10475	-32.2161	-1.72699	26.6837	-20.1577	7.51981	-1.65941	-10.0073	0		TC17583	weakly similar to UP|O49721_ARATH (O49721) Polygalacturonase-like protein (Fragment), partial (67%)	GO:0005975;GO:0004650	At4g18180.1	68417.m02701 glycoside hydrolase family 28 protein / polygalacturonase (pectinase) family protein similar to polygalacturonase [Salix gilgiana] GI:6714524; contains PF00295: Glycosyl hydrolases family 28 (po-TRUNCATED-	1.4e-117	1.4e-117	23.039	-11.469	-5.53855	-0.110628	0.938425	4.64955	6.81596	-4.68803	3.47515	7.1148	8.20139	17.2299	23.039
DT768503	similar to UP|Q5DW42_PHAVU (Q5DW42) Phototropin, partial (25%)	NA	At5g58140.1	68418.m07275 protein kinase family protein / non phototropic hypocotyl 1-like protein (NPL1) contains Pfam domains, PF00069: Protein kinase domain and PF00785: PAC motif; similar to SP:O48963 Nonphototropi-TRUNCATED-	4.3e-116	4.3e-116	-11.1798	-3.77765	3.47128	9.31595	0.0998484	-12.9885	-4.20152	14.1242	-12.1138	2.82127	-3.08336	-6.66482	0		DR933356	similar to UP|Q8LPV9_CUCMA (Q8LPV9) Phloem calmodulin-like-domain protein kinase PCPK1, partial (37%)	NA	At4g35310.1	68417.m05019 calcium-dependent protein kinase, putative / CDPK, putative similar to calmodulin-domain protein kinase CDPK isoform 6 [Arabidopsis thaliana] gi|1399275|gb|AAB03246; contains protein kinase doma-TRUNCATED-	9.5e-96	9.5e-96	23.0164	-4.62235	-4.6388	-1.44079	-1.40546	4.60855	5.09976	-4.79665	6.55975	5.16062	3.87218	6.30139	23.0164
TC18714	similar to UP|Q9FFC6_ARATH (Q9FFC6) GDSL-motif lipase/hydrolase-like protein, partial (86%)	GO:0016789;GO:0016298;GO:0008372	At5g22810.1	68418.m02667 GDSL-motif lipase, putative similar to EXL3 (GP:15054386) [Arabidopsis thaliana]	2e-125	2e-125	-10.9631	-1.0935	9.45764	7.62661	-3.7833	-15.6299	-1.24888	12.6568	-9.25751	4.30795	-4.83046	-13.3052	0		DT742890	weakly similar to UP|Q5VRG9_ORYSA (Q5VRG9) Dehydration-responsive protein-like, partial (13%)	NA	At1g33170.1	68414.m04096 dehydration-responsive family protein similar to early-responsive to dehydration stress ERD3 protein [Arabidopsis thaliana] GI:15320410; contains Pfam profile PF03141: Putative methyltransferase-TRUNCATED-	4.1e-33	4.1e-33	22.9947	-0.0955581	-6.19918	-2.30218	-2.82382	6.4933	3.87441	-7.50514	11.1387	2.16416	2.01313	7.11571	22.9947
TC16153	similar to PRF|NP_181414.1|15224955|NP_181414 calmodulin-binding protein-related {Arabidopsis thaliana}, partial (13%)	NA	At2g38800.1	68415.m04764 calmodulin-binding protein-related contains similarity to potato calmodulin-binding protein PCBP GI:17933110 from [Solanum tuberosum]	1e-26	1e-26	-10.9426	0.596979	-1.35168	0.837824	12.6152	0.870308	-8.84644	-0.863606	-8.32595	-10.6651	-1.07472	0.215668	0		TC16014	homologue to UP|ADT_ORYSA (P31691) ADP,ATP carrier protein, mitochondrial precursor (ADP/ATP translocase) (Adenine nucleotide translocator) (ANT), partial (86%)	GO:0006810;GO:0005743;GO:0005739;GO:0005488;GO:0006854;GO:0005471;GO:0006839;GO:0009060;GO:0005554	At3g08580.1	68416.m00995 ADP, ATP carrier protein 1, mitochondrial / ADP/ATP translocase 1 / adenine nucleotide translocator 1 (ANT1) identical to SWISS-PROT:P31167 ADP,ATP carrier protein 1 (Adenine nucleotide transloc-TRUNCATED-	6.4e-161	6.4e-161	22.991	-9.49084	-5.82559	-0.0626768	0.959574	4.76316	6.15835	-4.84386	4.0878	6.23827	7.35069	9.41147	22.991
TC9976	weakly similar to UP|Q6T284_9ROSI (Q6T284) Predicted protein, partial (8%)	NA	At1g57550.1	68414.m06529 hydrophobic protein, putative / low temperature and salt responsive protein, putative similar to SP|Q9ARD5 Low-temperature induced protein lt101.2 {Hordeum vulgare}, SP|Q9ZNQ7 Hydrophobic protei-TRUNCATED-	2.2	0.88	-10.8778	12.7759	-0.994696	1.76271	-1.65573	-0.75747	-5.17194	0.977925	0.364696	-5.90996	-12.6306	-6.93805	0		TC11427	similar to PRF|NP_179633.1|15225354|NP_179633 p21-rho-binding domain-containing protein {Arabidopsis thaliana}, partial (30%)	NA	At2g20430.1	68415.m02384 p21-rho-binding domain-containing protein contains Pfam PF00786: P21-Rho-binding domain	9.9e-30	9.9e-30	22.9434	-8.11047	-4.77869	-0.984821	0.760955	4.82361	7.07074	-5.4891	4.49291	4.52501	7.6856	12.321	22.9434
TC15915	similar to PRF|NP_564115.1|18394871|NP_564115 4-coumarate--CoA ligase family protein / 4-coumaroyl-CoA synthase family protein {Arabidopsis thaliana}, partial (95%)	GO:0016207;GO:0016208;GO:0008372;GO:0009698	At1g20510.1	68414.m02555 4-coumarate--CoA ligase family protein / 4-coumaroyl-CoA synthase family protein similar to SP|P14912 and SP|P14913 from Petroselinum crispum; contains Pfam AMP-binding enzyme domain PF00501 -TRUNCATED-	7.3e-224	7.3e-224	-10.8452	8.13226	-5.63879	2.04409	5.47904	2.68486	-23.5778	-3.27306	-1.34389	-12.9374	-9.13602	-2.96593	0		TC14292	similar to GB|AAF88097.1|9502390|AC025417 T12C24.13 {Arabidopsis thaliana}, partial (91%)	GO:0005554	At1g12600.1	68414.m01463 hypothetical protein	7.5e-151	7.5e-151	22.9366	-6.45846	-1.83875	-2.55455	-2.37388	3.88219	9.62922	-4.80301	7.12574	5.69843	6.19418	8.91729	22.9366
TC16742	similar to UP|Q8LLE2_SOLTU (Q8LLE2) BEL1-related homeotic protein 13 (Fragment), partial (51%)	NA	At2g23760.1	68415.m02837 BEL1-like homeobox 4 protein (BLH4)	1.6e-130	1.6e-130	-10.7442	-2.23624	6.44027	8.27902	0.861176	-13.4038	-3.62432	9.63612	-14.3986	2.6016	-2.05384	-8.55207	0		TC18576	similar to PRF|NP_187764.1|15229797|NP_187764 expressed protein {Arabidopsis thaliana}, partial (68%)	GO:0000004;GO:0008372;GO:0005554	At5g06230.1	68418.m00696 expressed protein contains Pfam profile PF03005: Arabidopsis proteins of unknown function	4.5e-128	4.5e-128	22.9351	-5.20502	-3.43194	-2.20618	-1.66662	2.75982	6.74331	-4.6627	6.39397	5.07085	6.9469	8.19887	22.9351
TC9827	similar to PIR|F96527|F96527 protein F27J15.20 [imported] {Arabidopsis thaliana}, partial (48%)	NA	At1g49010.1	68414.m05495 myb family transcription factor contains Pfam profile: PF00249 myb-like DNA-binding domain	6.9e-77	6.9e-77	-10.7369	11.1386	-0.729028	4.20935	-3.03915	-2.58153	-5.83505	2.2666	0.000111494	-2.99303	-10.3711	-10.5567	0		TC11143	weakly similar to UP|O80872_ARATH (O80872) Expressed protein (At2g30010) (At2g30010/F23F1.7), partial (59%)	GO:0000004;GO:0008372;GO:0005554	At5g58600.1	68418.m07343 expressed protein various predicted proteins, Arabidopsis thaliana and Oryza sativa	3.8e-115	3.8e-115	22.9351	-5.13565	-3.12537	0.372685	-4.18215	2.10692	9.9687	-1.76473	6.41256	10.3507	3.57294	3.23871	22.9351
TC13596	similar to UP|P93799_VITVI (P93799) Dihydroflavonol 4-reductase , partial (48%)	NA	At5g42800.1	68418.m05213 dihydroflavonol 4-reductase (dihydrokaempferol 4-reductase) (DFR) nearly identical to GI:166686	2.4e-67	2.4e-67	-10.6285	-3.10372	6.53395	9.39792	-1.89063	-18.7607	-1.85022	16.1771	-11.1449	4.27323	-3.66992	-8.29019	0		DR917072	NA	NA	At5g12350.1	68418.m01453 zinc finger protein, putative / regulator of chromosome condensation (RCC1) family protein similar to zinc finger protein [Arabidopsis thaliana] gi|15811367|gb|AAL08940	6.6e-79	6.6e-79	22.879	0.142837	-2.50541	-2.94829	-2.15113	8.64472	5.63335	-8.30189	12.4748	1.73202	3.95371	8.52874	22.879
TC9264	similar to UP|Q8L6C6_STERE (Q8L6C6) 1-deoxy-D-xylulose 5-phosphate synthase, partial (91%)	GO:0016114;GO:0008661	At4g15560.1	68417.m02377 1-deoxy-D-xylulose 5-phosphate synthase, putative / 1-deoxyxylulose-5-phosphate synthase, putative / DXP-synthase, putative (DEF) (CLA1) identical to SP|Q38854 Probable 1-deoxy-D-xylulose 5-phos-TRUNCATED-	8.3e-271	8.3e-271	-10.6167	-6.96819	4.71944	2.71984	10.2255	-4.70093	-4.11179	4.84972	-17.4823	-2.2232	1.58995	-0.873031	0		TC9640	similar to PRF|NP_187725.2|30681619|NP_187725 expressed protein {Arabidopsis thaliana}, partial (23%)	NA	At3g11150.1	68416.m01351 expressed protein	7.9e-76	7.9e-76	22.8234	-4.91346	-5.20041	-1.45696	-0.74093	5.82487	5.42274	-4.96881	6.98169	3.93157	4.78806	9.33444	22.8234
TC10203	similar to GB|AAF27058.1|6730637|AC008262 F4N2.13 {Arabidopsis thaliana}, partial (27%)	NA	At1g69170.1	68414.m07913 squamosa promoter-binding protein-like 6 (SPL6) identical to squamosa promoter binding protein-like 6 [Arabidopsis thaliana] GI:5931683; contains Pfam profile PF03110: SBP domain	3.4e-34	3.4e-34	-10.6129	13.077	0.380889	2.29914	-4.55875	-2.26768	-6.13255	1.33785	1.27731	-4.58457	-8.74233	-13.7103	0		TC19314	similar to PRF|NP_193880.2|42567013|NP_193880 pyridine nucleotide-disulphide oxidoreductase family protein {Arabidopsis thaliana}, partial (52%)	GO:0006118;GO:0015036;GO:0005739	At4g21490.1	68417.m03107 pyridine nucleotide-disulphide oxidoreductase family protein similar to GI:3718005 alternative NADH-dehydrogenase {Yarrowia lipolytica}; contains Pfam profile PF00070: Pyridine nucleotide-disulp-TRUNCATED-	3.9e-121	3.9e-121	22.7738	-5.75375	-1.4656	-1.44106	-2.15805	2.54191	8.67129	-2.86945	4.10381	7.44757	6.42652	8.56421	22.7738
DR912250	similar to UP|Q6VR10_THECC (Q6VR10) WRKY 13 (Fragment), partial (38%)	NA	At2g38470.1	68415.m04725 WRKY family transcription factor contains Pfam profile: PF03106 WRKY DNA -binding domain;	1.1e-31	1.1e-31	-10.5731	2.47836	3.56705	7.70711	-3.98437	-7.08324	-3.34381	8.94275	-4.9611	0.79288	-8.61629	-13.4075	0		DR913723	similar to UP|Q9LHJ9_ARATH (Q9LHJ9) Protein phosphatase 2C (At3g12620), partial (48%)	NA	At3g12620.1	68416.m01571 protein phosphatase 2C family protein / PP2C family protein similar to Ser/Thr protein phosphatase 2C (PP2C6) (GI:15020818) [Arabidopsis thaliana]; similar to protein phosphatase 2C (GI:3608412)-TRUNCATED-	1.1e-78	1.1e-78	22.7709	-5.08968	-1.65448	-1.08272	-3.50509	1.9563	8.77736	-1.95538	4.83232	6.07823	3.61583	6.16549	22.7709
TC12658	similar to PRF|NP_172461.1|15218325|NP_172461 pentatricopeptide (PPR) repeat-containing protein {Arabidopsis thaliana}, partial (77%)	GO:0000004;GO:0008372	At1g09900.1	68414.m01114 pentatricopeptide (PPR) repeat-containing protein contains Pfam profile PF01535: PPR repeat	5.5e-203	5.5e-203	-10.5023	7.70763	1.6417	1.15802	-2.68651	-3.03126	-5.32583	1.47644	-0.899092	-2.20484	-5.27492	-10.6543	0		DR953330	similar to UP|Q9LY17_ARATH (Q9LY17) Pectin methyl-esterase-like protein, partial (27%)	NA	At5g07420.1	68418.m00849 pectinesterase family protein contains Pfam profile: PF01095 pectinesterase	7.6e-60	7.6e-60	22.6804	-5.46493	-3.8959	-0.960826	-0.322706	4.3947	6.55533	-4.36054	4.24431	5.46184	5.34512	11.5975	22.6804
TC16209	weakly similar to UP|Q9AXL6_MUSAC (Q9AXL6) Beta-glucosidase (Fragment), partial (40%)	NA	At1g02850.3	68414.m00249 glycosyl hydrolase family 1 protein contains Pfam PF00232 : Glycosyl hydrolase family 1 domain; TIGRFAM TIGR01233: 6-phospho-beta-galactosidase; similar to hydroxyisourate hydrolase (GI:19569603-TRUNCATED-	1.7e-135	1.7e-135	-10.4884	-8.19096	8.95694	13.4684	-1.4057	-29.8589	-0.35956	33.7618	-24.2953	9.49189	-1.659	-8.31623	0		TC11022	weakly similar to PRF|NP_190640.1|15229834|NP_190640 F-box family protein {Arabidopsis thaliana}, partial (11%)	NA	At4g14096.1	68417.m02176 F-box family protein contains F-box domain Pfam:PF00646	5.2e-35	5.2e-35	22.6723	-6.05962	-3.03763	-1.80447	-0.542254	5.06668	7.07097	-4.49841	6.13122	3.97426	6.83307	12.8884	22.6723
TC14377	similar to UP|C98A3_ARATH (O22203) Cytochrome P450 98A3 , partial (95%)	GO:0009809;GO:0046409	At2g40890.1	68415.m05046 cytochrome P450 98A3, putative (CYP98A3) identical to Cytochrome P450 98A3 (SP|O22203) [Arabidopsis thaliana]; similar to gi:17978651 from Pinus taeda	1e-217	1e-217	-10.4673	-2.0299	6.89661	9.11959	-4.16691	-17.4691	-1.99517	13.5625	-11.1338	5.34233	-5.47847	-9.00965	0		TC15188	weakly similar to UP|PER41_ARATH (O23609) Peroxidase 41 precursor (Atperox P41) , partial (85%)	GO:0004601	At4g17690.1	68417.m02642 peroxidase, putative similar to peroxidase [Spinacia oleracea] gi|1781336|emb|CAA71495	6.5e-97	6.5e-97	22.6038	-11.17	-4.68759	-0.344402	1.3888	4.02189	6.95545	-3.50817	2.55185	5.87115	8.58027	15.955	22.6038
TC17002	similar to PRF|NP_850022.1|30681649|NP_850022 aminotransferase class I and II family protein {Arabidopsis thaliana}, partial (92%)	GO:0004069	At2g22250.2	68415.m02642 aminotransferase class I and II family protein similar to aspartate aminotransferase from Bacillus stearothermophilus SP|Q59228, Thermus aquaticus SP|O33822; contains Pfam profile PF00155 aminot-TRUNCATED-	3.6e-167	3.6e-167	-10.4666	-1.27805	2.55097	1.71068	11.0813	-3.31092	-6.74287	3.34102	-9.98974	-5.13168	-0.0752904	-1.70053	0		TC11539	similar to UP|O80644_ARATH (O80644) Expressed protein, partial (79%)	GO:0000004;GO:0005554;GO:0008372	At2g39570.1	68415.m04854 ACT domain-containing protein contains Pfam ACT domain PF01842	6.1e-140	6.1e-140	22.5302	-0.302428	-7.7029	-4.97044	-2.67036	9.83541	5.92308	-10.4137	14.9574	2.13347	3.60121	10.5739	22.5302
DT765920	similar to GB|AAM61951.1|21541739|AF516172 transcription factor WRKY44 {Arabidopsis thaliana}, partial (23%)	NA	At1g13960.2	68414.m01642 WRKY family transcription factor similar to WKRY DNA-binding protein GB:AAD17441	3.6e-32	3.6e-32	-10.4478	2.77629	2.0664	7.03499	-3.31488	-6.97926	-5.29698	7.85746	-5.05252	0.434056	-8.08036	-11.1948	0		DR925709	weakly similar to PRF|NP_172574.1|15220280|NP_172574 hydroxyproline-rich glycoprotein family protein {Arabidopsis thaliana}, partial (16%)	NA	At4g04980.1	68417.m00724 hydroxyproline-rich glycoprotein family protein Common family members: At4g18570, At3g25690, At5g61090 [Arabidopsis thaliana]	1.9e-51	1.9e-51	22.5135	-6.47409	-3.70556	-1.36971	-0.456564	4.25716	6.64826	-4.26102	4.52846	4.46198	6.10282	10.4848	22.5135
TC16881	weakly similar to PRF|NP_973597.1|42571047|NP_973597 expressed protein {Arabidopsis thaliana}, partial (28%)	NA	At2g34357.1	68415.m04206 expressed protein	1.6e-178	1.6e-178	-10.3516	12.6337	1.37851	-0.563178	-1.69761	-0.803938	-3.08512	0.664038	0.400002	-5.17597	-6.9297	-11.2825	0		TC9011	similar to PRF|NP_568458.1|18420844|NP_568458 ABC1 family protein {Arabidopsis thaliana}, partial (30%)	NA	At5g24810.1	68418.m02930 ABC1 family protein contains Pfam domain, PF03109: ABC1 family	5e-136	5e-136	22.4581	-2.03242	-3.04068	-1.4873	-4.46679	3.8949	9.66291	-2.78602	8.88868	7.61806	3.01902	6.37326	22.4581
TC8469	similar to UP|Q9XEY9_TOBAC (Q9XEY9) NT3, partial (10%)	NA	At3g22790.1	68416.m02873 kinase interacting family protein similar to kinase interacting protein 1 (GI:13936326) [Petunia integrifolia]	1.9e-48	1.9e-48	-10.3226	12.2349	-3.45485	-1.63414	4.3358	3.10942	-10.2789	-3.60185	0.68243	-18.5422	-5.62664	-3.96854	0		DR946349	weakly similar to UP|Q58P69_ARATH (Q58P69) Cation/H+ exchanger (Fragment), partial (3%)	NA	At2g13620.1	68415.m01501 cation/hydrogen exchanger, putative (CHX15) monovalent cation:proton antiporter family 2 (CPA2) member, PMID:11500563	9.7e-27	9.7e-27	22.4359	-5.58693	-3.35384	-0.996101	-0.480793	3.04034	5.64289	-2.91899	3.85565	4.26499	5.38137	10.5387	22.4359
TC11513	similar to UP|Q85V22_ORYSA (Q85V22) Histidine amino acid transporter, partial (94%)	GO:0015359;GO:0005279;GO:0006865;GO:0016020	At5g40780.1	68418.m04950 lysine and histidine specific transporter, putative strong similarity to lysine and histidine specific transporter GI:2576361 from [Arabidopsis thaliana]; contains Pfam profile PF01490: Transmem-TRUNCATED-	6.1e-192	6.1e-192	-10.2726	-3.27943	-1.75782	10.2381	5.84148	-5.75647	-6.65512	6.24872	-13.2451	-1.5327	-4.59911	-2.35986	0		TC11770	weakly similar to UP|Q9LTX8_ARATH (Q9LTX8) Arabidopsis thaliana genomic DNA, chromosome 5, TAC clone:K9P8 (At5g49920), partial (22%)	NA	At5g49920.1	68418.m06181 octicosapeptide/Phox/Bem1p (PB1) domain-containing protein contains Pfam profile PF00564: PB1 domain	9.3e-34	9.3e-34	22.3818	-5.92996	-2.07641	-0.353446	-3.12012	2.28244	8.65266	-2.10437	4.48636	7.52767	5.27968	7.70084	22.3818
TC9569	weakly similar to UP|O81816_ARATH (O81816) Monooxygenase 2 (MO2) , partial (58%)	GO:0004497	At4g38540.1	68417.m05456 monooxygenase, putative (MO2) identical to GI:3426064	6.3e-115	6.3e-115	-10.2184	4.91154	-3.81215	1.2489	4.48012	1.55967	-12.2488	-1.52875	-1.59621	-10.0126	-7.47801	-3.79291	0		TC18949	similar to UP|Q6Q2Z9_SOYBN (Q6Q2Z9) Phosphoenolpyruvate carboxylase , partial (39%)	NA	At1g68750.1	68414.m07859 phosphoenolpyruvate carboxylase family protein / PEP carboxylase family protein similar to SP|P51059 Phosphoenolpyruvate carboxylase 2 (EC 4.1.1.31) (PEPCASE) {Zea mays}; contains Pfam profile P-TRUNCATED-	1.2e-182	1.2e-182	22.3631	-4.74212	-5.37114	-2.80437	0.285465	6.2759	5.58729	-6.71576	7.27535	3.4101	5.88078	12.7455	22.3631
TC8970	homologue to UP|Q9AXP9_9ROSI (Q9AXP9) Cinnamate 4-hydroxylase , complete	GO:0009699;GO:0005783;GO:0009416;GO:0009611	At2g30490.1	68415.m03714 trans-cinnamate 4-monooxygenase / cinnamic acid 4-hydroxylase (C4H) (CA4H) / cytochrome P450 73 (CYP73) (CYP73A5) identical to SP|P92994| Trans-cinnamate 4-monooxygenase (EC 1.14.13.11) (Cinnami-TRUNCATED-	2e-237	2e-237	-10.1717	-5.31867	0.834013	6.55729	8.68311	-4.09432	-8.61937	5.94001	-17.5775	-2.62125	-0.473261	-1.1202	0		DT749586	weakly similar to UP|Q7EZ44_ORYSA (Q7EZ44) Receptor-like kinase Xa21-binding protein 3-like, partial (25%)	NA	At5g57740.1	68418.m07218 zinc finger (C3HC4-type RING finger) family protein / ankyrin repeat family protein contains Pfam profile: PF00097 zinc finger, C3HC4 type (RING finger) and Pfam profile: PF00023 ankyrin repeat -TRUNCATED-	2.2e-57	2.2e-57	22.2147	-5.52746	-3.58823	-2.66229	-0.0703066	5.15838	6.60878	-5.2159	4.80656	3.74627	6.59381	6.80273	22.2147
TC14749	similar to UP|Q501D4_ARATH (Q501D4) At1g72040, partial (59%)	GO:0006139;GO:0005524;GO:0016773	At1g72040.1	68414.m08327 deoxynucleoside kinase family contains Pfam profile: PF01712 deoxynucleoside kinase	1.4e-179	1.4e-179	-10.1099	15.8024	3.33661	0.417649	-5.42961	-2.36137	-4.10645	2.57446	1.43454	-4.73934	-11.5161	-13.4705	0		TC10529	weakly similar to UP|O49721_ARATH (O49721) Polygalacturonase-like protein (Fragment), partial (67%)	GO:0005975;GO:0004650	At4g18180.1	68417.m02701 glycoside hydrolase family 28 protein / polygalacturonase (pectinase) family protein similar to polygalacturonase [Salix gilgiana] GI:6714524; contains PF00295: Glycosyl hydrolases family 28 (po-TRUNCATED-	3.2e-111	3.2e-111	22.1094	-11.086	-6.03049	-0.17979	1.7282	4.7236	6.23494	-4.28104	2.95117	5.49188	7.77985	16.0266	22.1094
TC13532	similar to PIR|T47553|T47553 peroxiredoxin-like protein {Arabidopsis thaliana}, partial (68%)	GO:0000004;GO:0016209;GO:0008372	At3g52960.1	68416.m05838 peroxiredoxin type 2, putative similar to type 2 peroxiredoxin [Brassica rapa subsp. pekinensis] GI:4928472; contains Pfam profile: PF00578 AhpC/TSA (alkyl hydroperoxide reductase and thiol-spec-TRUNCATED-	2.3e-69	2.3e-69	-10.0174	2.91389	4.58799	3.8226	-3.88198	-3.61109	-1.40528	6.76274	-3.99879	0.557213	-4.36791	-13.2678	0		DR951921	weakly similar to PRF|NP_178475.2|30678079|NP_178475 18S pre-ribosomal assembly protein gar2-related {Arabidopsis thaliana}, partial (4%)	NA	At3g02125.1	68416.m00179 hypothetical protein	0.52	0.41	22.0726	-5.1192	-4.50494	-1.67874	-0.292485	4.75919	4.33361	-4.26535	4.49215	4.09232	4.8832	8.83626	22.0726
TC15692	similar to UP|Q5QLC5_ORYSA (Q5QLC5) NLI interacting factor (NIF) family protein-like, partial (64%)	GO:0000004;GO:0005554;GO:0008372	At3g55960.1	68416.m06218 NLI interacting factor (NIF) family protein contains Pfam profile PF03031: NLI interacting factor	1.3e-89	1.3e-89	-9.97868	-2.18314	-1.63491	9.65181	2.64419	-6.30252	-4.01276	5.51847	-10.2752	-0.767552	-5.58952	-3.87644	0		TC12766	similar to PRF|NP_198220.1|15241880|NP_198220 protein kinase family protein {Arabidopsis thaliana}, partial (36%)	NA	At5g28680.1	68418.m03519 protein kinase family protein contains protein kinase domain, Pfam:PF00069	1.8e-142	1.8e-142	21.9582	-11.1267	-6.1408	-0.132781	1.30666	5.41771	6.28798	-5.67941	4.09615	4.80643	6.27123	16.359	21.9582
TC12360	similar to UP|Q38848_ARATH (Q38848) LRP1, partial (50%)	GO:0009733;GO:0005554;GO:0008372	At5g12330.1	68418.m01449 lateral root primordium 1 (LRP1) identical to lateral root primordium 1 (LRP1) [Arabidopsis thaliana] GI:882341; contains Pfam profile PF05142: Domain of unknown function (DUF702)	8e-83	8e-83	-9.96156	6.05259	4.68198	-0.353222	-3.37758	-4.34647	-2.43264	3.8555	-0.952178	-3.2441	-6.19493	-12.156	0		DT768282	weakly similar to UP|Q9LV98_ARATH (Q9LV98) Beta-1,3-glucanase, partial (46%)	NA	At5g64790.1	68418.m08146 glycosyl hydrolase family 17 protein similar to elicitor inducible chitinase Nt-SubE76 GI:11071974 from [Nicotiana tabacum]	4e-81	4e-81	21.9441	-6.99268	-3.93354	-1.35618	0.637344	4.7304	6.2691	-4.51122	4.24568	4.98503	7.34234	13.2828	21.9441
TC10866	weakly similar to PRF|NP_189233.1|15230978|NP_189233 transferase family protein {Arabidopsis thaliana}, partial (31%)	NA	At3g26040.1	68416.m03243 transferase family protein similar to deacetylvindoline 4-O-acetyltransferase [Catharanthus roseus][GI:4091808][PMID:9681034], alcohol acyltransferase [Fragaria x ananassa][GI:10121328][PMID:108-TRUNCATED-	1.5e-81	1.5e-81	-9.94259	1.55745	7.95205	6.63855	-6.06337	-11.7127	-2.3464	14.8182	-5.47827	2.03713	-7.02856	-17.8577	0		TC15021	similar to PRF|NP_197366.1|15238890|NP_197366 zinc finger (C3HC4-type RING finger) family protein {Arabidopsis thaliana}, complete	GO:0005515;GO:0008270	At5g18650.1	68418.m02214 zinc finger (C3HC4-type RING finger) family protein contains Pfam domain PF00097: Zinc finger, C3HC4 type (RING finger)	5.2e-127	5.2e-127	21.8745	-6.79237	-2.3864	-2.03328	-1.96848	3.4562	9.49937	-3.85365	5.85492	4.63559	5.22946	8.26042	21.8745
TC11976	weakly similar to UP|Q69TY8_ORYSA (Q69TY8) Receptor protein kinase-like, partial (16%)	NA	At2g33580.1	68415.m04115 protein kinase family protein / peptidoglycan-binding LysM domain-containing protein protein kinase [Arabidopsis thaliana] GI:2852449; contains Pfam profiles PF01476: LysM domain, PF00069: Prote-TRUNCATED-	2.4e-102	2.4e-102	-9.91547	-1.08499	-2.47263	10.1465	2.95416	-4.87834	-7.24167	4.01599	-5.68956	-1.07623	-3.69517	-3.6796	0		TC12979	weakly similar to UP|Q9SYK9_ARATH (Q9SYK9) F3F20.13 protein (At1g05680), partial (50%)	GO:0016757;GO:0016758;GO:0008194;GO:0008372	At1g05680.1	68414.m00589 UDP-glucoronosyl/UDP-glucosyl transferase family protein contains Pfam profile: PF00201 UDP-glucoronosyl and UDP-glucosyl transferase	5.7e-105	5.7e-105	21.8659	-8.00353	0.750733	-4.23065	-2.00795	2.37369	10.2333	-1.30524	3.6454	9.73518	11.1715	6.01353	21.8659
DT745050	similar to UP|Q9M7S0_MALDO (Q9M7S0) Homeodomain protein, partial (21%)	NA	At4g36870.1	68417.m05228 BEL1-like homeobox 2 protein (BLH2)	3.5e-50	3.5e-50	-9.89998	-3.37155	5.31534	8.27621	0.633168	-13.8029	-3.10146	9.98057	-14.8152	1.95894	-2.03252	-7.57235	0		TC15468	similar to UP|Q5VRG9_ORYSA (Q5VRG9) Dehydration-responsive protein-like, partial (73%)	GO:0016023;GO:0045045;GO:0008168;GO:0005739;GO:0005554	At1g33170.1	68414.m04096 dehydration-responsive family protein similar to early-responsive to dehydration stress ERD3 protein [Arabidopsis thaliana] GI:15320410; contains Pfam profile PF03141: Putative methyltransferase-TRUNCATED-	2.4e-209	2.4e-209	21.8601	2.79924	-11.8132	-3.32816	-3.03977	13.0937	2.71043	-13.6549	14.8479	0.280683	0.850803	9.00741	21.8601
TC14283	similar to UP|PSBP_FRIAG (O49080) Oxygen-evolving enhancer protein 2, chloroplast precursor (OEE2) (23 kDa subunit of oxygen evolving system of photosystem II) (OEC 23 kDa subunit) (23 kDa thylakoid membrane protein), complete	GO:0009654;GO:0030095;GO:0009543	At1g06680.1	68414.m00708 photosystem II oxygen-evolving complex 23 (OEC23) JBC 14:211-238 (2002); identical to 23 kDa polypeptide of oxygen-evolving comlex (OEC) GB:CAA66785 GI:1769905 [Arabidopsis thaliana]	1.1e-101	1.1e-101	-9.89628	3.00859	3.94783	4.41611	-4.14711	-4.81798	-2.93111	7.49057	-2.42496	0.450446	-5.21692	-10.4413	0		TC17977	similar to UP|Q9ZR47_DAUCA (Q9ZR47) Neutral invertase , partial (45%)	GO:0004564	At3g05820.1	68416.m00653 beta-fructofuranosidase, putative / invertase, putative / saccharase, putative / beta-fructosidase, putative similar to neutral invertase [Daucus carota] GI:4200165; contains Pfam profile PF0485-TRUNCATED-	1.9e-145	1.9e-145	21.816	-3.83406	-4.43006	-0.828081	-0.114887	4.43795	4.00552	-4.08156	5.21885	4.4231	5.59205	11.9026	21.816
TC14843	similar to UP|Q39850_SOYBN (Q39850) Acetyl-CoA carboxylase (Fragment), partial (55%)	NA	At1g36160.1	68414.m04495 acetyl-CoA carboxylase 1 (ACC1) nearly identical to acetyl-CoA carboxylase 1 (ACC1) [Arabidopsis thaliana] GI:11869927	0	0	-9.82168	-1.32598	6.78156	9.27224	-4.67373	-17.4919	-2.23685	16.7086	-7.47502	4.16484	-4.70843	-10.9698	0		TC15357	similar to UP|Q7DM36_ARATH (Q7DM36) H1flk (Fragment), partial (63%)	GO:0008372;GO:0005554	At2g30630.1	68415.m03732 expressed protein similar to H1-1flk [Arabidopsis thaliana] GI:388260	1e-171	1e-171	21.7815	-0.785105	-6.42815	-4.39596	-1.59179	8.35169	5.17971	-7.62573	12.3941	1.80198	4.72667	9.81582	21.7815
TC11823	NA	NA	At2g40460.1	68415.m04993 proton-dependent oligopeptide transport (POT) family protein contains Pfam profile: PF00854 POT family	5.8e-96	5.8e-96	-9.76852	-2.22079	4.28179	7.93489	-2.61936	-12.3573	-2.60999	10.2102	-8.7788	2.4676	-4.71518	-10.0536	0		TC12710	similar to PRF|NP_564504.1|18401703|NP_564504 protein phosphatase 2C-related / PP2C-related {Arabidopsis thaliana}, partial (92%)	GO:0000004;GO:0015071;GO:0008372	At1g47380.1	68414.m05245 protein phosphatase 2C-related / PP2C-related contains similarity to protein phosphatase 2C GB:AAD25933 GI:4587992 from [Arabidopsis thaliana]	7.1e-178	7.1e-178	21.7215	-2.90404	-2.68826	-2.86029	-1.68698	5.6523	3.71195	-5.48239	5.7427	5.48065	6.55653	10.1728	21.7215
TC11122	similar to PRF|NP_564341.1|18397295|NP_564341 DNA-directed RNA polymerase family protein {Arabidopsis thaliana}, partial (28%)	NA	At1g29940.1	68414.m03658 DNA-directed RNA polymerase family protein similar to SP|P22138 DNA-directed RNA polymerase I 135 kDa polypeptide (EC 2.7.7.6) (RNA polymerase I subunit 2) {Saccharomyces cerevisiae}; contains P-TRUNCATED-	3.9e-154	3.9e-154	-9.54189	15.622	2.23729	-1.2546	-3.51792	-0.549227	-3.72497	0.537242	1.5738	-4.42704	-7.58564	-10.8622	0		TC10575	weakly similar to UP|Q5NUF4_GLYEC (Q5NUF4) 2-Hydroxyisoflavanone dehydratase, partial (49%)	NA	At1g47480.1	68414.m05267 expressed protein similar to PrMC3 [Pinus radiata] GI:5487873	1.1e-71	1.1e-71	21.7109	-0.604858	-4.03989	-3.09065	-3.85231	5.78475	5.42965	-5.32319	9.49533	2.67774	2.5848	6.04215	21.7109
TC15988	similar to UP|Q43169_SOLTU (Q43169) Alcohol dehydrogenase , partial (57%)	NA	At1g32780.1	68414.m04041 alcohol dehydrogenase, putative similar to alcohol dehydrogenase GB:CAA37333 GI:297178 from [Solanum tuberosum]; contains Pfam zinc-binding dehydrogenase domain PF00107	4.4e-91	4.4e-91	-9.52332	-2.84449	6.67178	4.11248	0.378885	-6.0507	-2.25115	11.0329	-5.92603	1.50997	-1.80004	-6.30934	0		DR944191	similar to PIR|D85429|D85429 cytochrome P450 like protein [imported] {Arabidopsis thaliana}, partial (29%)	NA	At4g36380.1	68417.m05169 cytochrome P450 90C1 (CYP90C1) / rotundifolia3 (ROT3) identical to Cytochrome P450 90C1 (ROTUNDIFOLIA3) (SP:Q9M066) [Arabidopsis thaliana];	9.6e-87	9.6e-87	21.5905	-2.43775	-4.38802	-1.41104	-3.16848	5.07242	5.65899	-4.54228	7.75747	4.31478	2.92667	6.80116	21.5905
																					TC17530	similar to UP|Q9FZM9_ORYSA (Q9FZM9) Dihydroorotate dehydrogenase, partial (63%)	GO:0006207;GO:0004152;GO:0005739	At5g23300.1	68418.m02726 dihydroorotate dehydrogenase, mitochondrial / dihydroorotate oxidase / DHOdehase (PYRD) nearly identical to SP|P32746 Dihydroorotate dehydrogenase, mitochondrial precursor (EC 1.3.3.1) (Dihydroo-TRUNCATED-	1.6e-139	1.6e-139	21.4791	-3.55742	-2.13847	-2.70637	-2.99313	3.26115	6.72021	-3.25381	7.47456	4.9392	5.02124	8.26238	21.4791
																					TC18850	similar to PRF|NP_173193.1|15220134|NP_173193 haloacid dehalogenase-like hydrolase family protein {Arabidopsis thaliana}, partial (25%)	NA	At1g17500.1	68414.m02150 haloacid dehalogenase-like hydrolase family protein similar to Potential phospholipid-transporting ATPase (EC 3.6.3.1) from Homo sapiens [SP|O43520], Mus musculus [SP|P70704]; contains InterPro -TRUNCATED-	1.1e-135	1.1e-135	21.4668	-4.37882	-3.37109	-1.66205	-0.0563445	4.42324	7.67896	-4.81337	5.27696	3.92042	7.72176	13.6268	21.4668
																					TC15571	similar to UP|Q9MB23_ARATH (Q9MB23) ATMPK8, partial (80%)	GO:0004672;GO:0009738;GO:0016301;GO:0005739;GO:0008372;GO:0006979;GO:0004707;GO:0006950;GO:0007165	At3g18040.1	68416.m02294 mitogen-activated protein kinase, putative / MAPK, putative (MPK9) identical to ATMPK9 [Arabidopsis thaliana] gi|7106544|dbj|BAA92223; mitogen-activated protein kinase (MAPK), PMID:12119167; sim-TRUNCATED-	2.1e-219	2.1e-219	21.4579	-4.70524	-3.2636	-3.265	-3.94169	4.20197	9.83723	-5.47152	10.0957	3.75971	3.0254	8.89525	21.4579
																					TC19058	NA	NA	At5g55060.1	68418.m06862 expressed protein	4.6e-24	4.6e-24	21.4372	-2.08549	-5.38853	-3.88454	-0.615725	7.02348	6.38154	-8.0504	9.01023	2.62353	5.45304	11.5605	21.4372
																					TC8064	weakly similar to UP|Q84TF0_ARATH (Q84TF0) At2g37790, partial (92%)	GO:0004033	At2g37790.1	68415.m04640 aldo/keto reductase family protein similar to chalcone reductase [Sesbania rostrata][GI:2792155], and aldose reductase ALDRXV4 [Xerophyta viscosa][GI:4539944], [Hordeum vulgare][GI:728592] -TRUNCATED-	5.6e-114	5.6e-114	21.3519	-6.09864	-5.17053	-2.38582	-1.42584	6.16258	9.20732	-5.64475	7.3602	6.7279	7.08415	13.4925	21.3519
																					TC16063	similar to PRF|NP_850475.1|30690701|NP_850475 kinesin motor protein-related {Arabidopsis thaliana}, partial (25%)	NA	At1g09170.1	68414.m01024 kinesin motor protein-related similar to GB:AAB61066	2.6e-93	2.6e-93	21.3319	-5.35531	-4.18482	-3.56383	2.28038	9.5604	4.38576	-8.00273	5.0071	1.89783	5.99162	11.8794	21.3319
																					DR929037	similar to PRF|NP_564360.1|18397616|NP_564360 SEC14 cytosolic factor family protein / phosphoglyceride transfer family protein {Arabidopsis thaliana}, partial (22%)	NA	At1g30690.1	68414.m03752 SEC14 cytosolic factor family protein / phosphoglyceride transfer family protein contains Pfam PF00650 : CRAL/TRIO domain; contains Pfam PF03765 : CRAL/TRIO, N-terminus; similar to cytosolic fac-TRUNCATED-	3.5e-41	3.5e-41	21.2702	-0.0968491	-5.45976	-3.3008	-2.0079	7.99956	4.56491	-7.13872	11.3171	1.65523	2.42813	8.18212	21.2702
																					TC18463	similar to PRF|NP_190745.1|15231033|NP_190745 tetratricopeptide repeat (TPR)-containing protein {Arabidopsis thaliana}, partial (17%)	NA	At3g51770.1	68416.m05677 tetratricopeptide repeat (TPR)-containing protein contains Pfam profile PF00515: TPR Domain	3.8e-43	3.8e-43	21.2682	-6.31188	-1.6325	-2.804	-1.6033	3.28585	8.87297	-3.96628	5.15896	6.80016	7.41176	10.1853	21.2682
																					TC19701	similar to UP|Q70US4_DIRIM (Q70US4) NADH dehydrogenase 6, partial (16%)	NA	At5g50830.1	68418.m06297 expressed protein	1.8e-11	1.8e-11	21.2589	-8.33286	-5.16471	-1.24511	0.368848	4.36914	6.67829	-3.72914	4.53258	4.65668	6.96433	13.1971	21.2589
																					TC15847	similar to UP|Q53VM1_LOTJA (Q53VM1) Ser/Thr protein kinase, partial (94%)	GO:0004672;GO:0009887;GO:0004674;GO:0045892;GO:0000166;GO:0005737;GO:0006468;GO:0005829;GO:0008283;GO:0008372;GO:0016740;GO:0004696;GO:0006916;GO:0006917;GO:0006950;GO:0045444;GO:0005977;GO:0008013;GO:0050321;GO:0016301;GO:0016310;GO:0007151;GO:0004713;GO:0005515;GO:0005524;GO:0016055;GO:0000320;GO:0006611;GO:0006508;GO:0005634;GO:0030010	At4g00720.1	68417.m00098 shaggy-related protein kinase theta / ASK-theta (ASK8) identical to shaggy-related protein kinase theta (ASK-theta) [Arabidopsis thaliana] SWISS-PROT:Q96287	8.8e-196	8.8e-196	21.2503	0.227509	-6.72138	-3.61622	-3.91543	8.04733	4.826	-6.28033	10.3469	3.1381	1.89441	7.26825	21.2503
																					TC13876	similar to PRF|NP_176551.2|30696876|NP_176551 kinesin motor protein-related {Arabidopsis thaliana}, partial (7%)	NA	At1g63640.1	68414.m07197 kinesin motor protein-related C-terminal region is similar to C-term region of kinesin motor protein GB:AAB51397 (Mus musculus); contains Pfam profile: PF00225 Kinesin motor domain	2.8e-33	2.8e-33	21.1836	0.0782321	-4.62319	-4.14987	-2.28776	8.45024	5.71412	-7.45316	11.9671	1.6406	3.67106	7.9114	21.1836
																					TC18937	weakly similar to PRF|NP_564922.1|18408946|NP_564922 epsin N-terminal homology (ENTH) domain-containing protein / clathrin assembly protein-related {Arabidopsis thaliana}, partial (27%)	NA	At1g25240.1	68414.m03132 epsin N-terminal homology (ENTH) domain-containing protein / clathrin assembly protein-related contains Pfam PF01417: ENTH domain. ENTH (Epsin N-terminal homology) domain; similar to clathrin a-TRUNCATED-	9.1e-82	9.1e-82	21.1517	-10.6155	-1.68877	0.33524	-2.89582	0.979378	8.57691	-0.820473	3.20322	11.225	4.55968	8.19391	21.1517
																					TC14985	similar to UP|Q7PKL4_ANOGA (Q7PKL4) ENSANGP00000025312 (Fragment), partial (7%)	NA	At1g57680.1	68414.m06545 expressed protein	1.1e-10	1.1e-10	21.1394	-6.00269	-1.08515	-2.07272	-3.03182	2.77997	8.83521	-2.32798	4.57419	7.80775	5.75113	7.70084	21.1394
																					TC10636	homologue to UP|Q4T788_TETNG (Q4T788) Chromosome undetermined SCAF8234, whole genome shotgun sequence, partial (10%)	NA	At4g03250.1	68417.m00444 homeobox-leucine zipper family protein similar to homeobox transcription factor Hox7 [Lycopersicon peruvianum] GI:19486; contains Pfam PF00046: Homeobox domain	2.9e-29	2.9e-29	21.0796	-2.7298	-2.91683	-1.32377	-2.62227	4.94069	6.67801	-2.88466	4.99011	5.97535	4.1611	4.25489	21.0796
																					TC17689	similar to UP|FLS_CITUN (Q9ZWQ9) Flavonol synthase/flavanone 3-hydroxylase (FLS) (CitFLS) , partial (94%)	GO:0045431;GO:0009813;GO:0008372	At5g08640.1	68418.m01027 flavonol synthase 1 (FLS1) identical to SP|Q96330; contains PF03171 2OG-Fe(II) oxygenase superfamily	3e-115	3e-115	21.0249	-3.71256	-0.774536	-1.83923	-6.3011	2.05921	12.0906	-2.01389	5.86663	9.29763	4.03554	4.8473	21.0249
																					TC16412	similar to PRF|NP_187872.1|15230560|NP_187872 fasciclin-like arabinogalactan family protein {Arabidopsis thaliana}, partial (34%)	NA	At2g24450.1	68415.m02922 fasciclin-like arabinogalactan family protein similar to fasciclin-like arabinogalactan-protein 1 [Arabidopsis thaliana] gi|13377776|gb|AAK20857	1e-52	1e-52	20.9755	-11.5449	-4.17476	-0.267997	1.48684	4.02288	6.30135	-4.37755	2.96626	6.24873	7.93467	15.0757	20.9755
																					TC16152	similar to UP|Q6L4A7_SOLDE (Q6L4A7) Expressed protein, partial (62%)	GO:0000004;GO:0005554;GO:0008372	At5g51840.1	68418.m06427 expressed protein	6.6e-72	6.6e-72	20.9739	-2.2747	-3.27062	-3.39848	-2.59317	5.11801	6.76825	-5.55594	8.53346	3.91721	4.27652	7.65837	20.9739
																					TC13359	similar to UP|Q9LS54_ARATH (Q9LS54) Gb|AAF16598.1 (At3g18360), partial (13%)	NA	At3g18360.1	68416.m02335 VQ motif-containing protein contains PF05678: VQ motif	1.1e-19	1.1e-19	20.8691	-4.52405	-3.00264	-2.29397	-1.75523	3.16097	4.80965	-4.6561	5.79424	3.6044	3.94763	5.65744	20.8691
																					TC12862	homologue to UP|Q6TKQ5_VITAE (Q6TKQ5) Protein kinase-like protein, partial (53%)	GO:0016301;GO:0008372	At5g18610.1	68418.m02203 protein kinase family protein contains eukaryotic protein kinase domain, PROSITE:PS00107	3.7e-85	3.7e-85	20.8671	-4.09592	-3.05545	-2.64239	-0.594595	4.95734	6.81088	-5.22936	6.21637	3.79137	5.93861	10.3032	20.8671
																					TC18687	weakly similar to PRF|NP_191839.2|22331912|NP_191839 double-stranded RNA-binding domain (DsRBD)-containing protein {Arabidopsis thaliana}, partial (12%)	NA	At3g62800.1	68416.m07055 double-stranded RNA-binding domain (DsRBD)-containing protein weak similarity to SP|P19525 Interferon-induced, double-stranded RNA-activated protein kinase (EC 2.7.1.-) {Homo sapiens}; contains-TRUNCATED-	3.8e-37	3.8e-37	20.8308	-3.18877	-3.09875	-3.37332	-3.03879	4.99023	7.49166	-5.57907	7.70257	5.23854	5.10512	8.65932	20.8308
																					TC9245	similar to UP|Q40474_TOBAC (Q40474) Axi 1 protein, partial (71%)	GO:0000004;GO:0005554;GO:0008372	At1g76270.1	68414.m08856 expressed protein contains Pfam PF03138: Plant protein family. The function of this family of plant proteins is unknown; previously annotated as ' auxin-independent growth promoter -related' bas-TRUNCATED-	5.5e-202	5.5e-202	20.7841	-0.729128	-3.75118	-5.59524	-2.41068	7.53124	6.67853	-7.42019	13.2376	2.30715	2.44445	8.2328	20.7841
																					DT760301	similar to UP|Q8VZG7_ARATH (Q8VZG7) AT5g07350/T2I1_60, partial (25%)	NA	At5g07350.1	68418.m00839 tudor domain-containing protein / nuclease family protein contains Pfam domains PF00567: Tudor domain and PF00565: Staphylococcal nuclease homologue	2.9e-94	2.9e-94	20.7566	-4.32074	-3.57972	-0.212544	-3.11938	3.24529	5.58311	-2.40825	5.44842	5.58388	3.62399	5.53059	20.7566
																					DR937503	weakly similar to UP|Q39651_9ROSI (Q39651) PreproMP27-MP32 precursor, partial (28%)	NA	At2g28490.1	68415.m03462 cupin family protein similar to preproMP27-MP32 [Cucurbita cv. Kurokawa Amakuri] GI:691752, allergen Gly m Bd 28K [Glycine max] GI:12697782, vicilin [Matteuccia struthiopteris] GI:1019792; conta-TRUNCATED-	2.8e-48	2.8e-48	20.7479	-4.20828	-4.69321	-1.44123	-2.19223	4.95694	6.19795	-4.38608	6.78672	5.11015	4.75497	9.46188	20.7479
																					TC12821	similar to UP|Q4ACU3_ZINEL (Q4ACU3) Steroid 22-alpha-hydroxylase, partial (78%)	GO:0009826;GO:0016132;GO:0010012	At3g50660.1	68416.m05541 steroid 22-alpha-hydroxylase (CYP90B1) (DWF4) identical to gi:2935342	2.1e-172	2.1e-172	20.6921	-6.71345	3.93489	-4.25238	-3.09205	0.677469	18.9412	-0.833858	3.32265	9.23834	10.9484	7.46593	20.6921
																					TC16525	similar to PRF|NP_189269.2|30688284|NP_189269 glycosyl hydrolase family protein 27 / alpha-galactosidase family protein / melibiase family protein {Arabidopsis thaliana}, partial (69%)	GO:0004557;GO:0008372	At3g26380.1	68416.m03290 glycosyl hydrolase family protein 27 / alpha-galactosidase family protein / melibiase family protein similar to alpha-galactosidase GI:10944326 from [Phanerochaete chrysosporium]	7.9e-211	7.9e-211	20.684	-1.16318	-4.03341	-4.18935	-2.927	5.48659	7.05645	-5.54663	12.3653	3.65172	3.70447	6.8835	20.684
																					DT768801	similar to UP|Q6H7J6_ORYSA (Q6H7J6) Oligopeptide transporter OPT-like, partial (20%)	NA	At1g65730.1	68414.m07460 oligopeptide transporter OPT family protein similar to iron-phytosiderophore transporter protein yellow stripe 1 [Zea mays] GI:10770865; contains Pfam profile PF03169: OPT oligopeptide transport-TRUNCATED-	4.2e-77	4.2e-77	20.6374	-5.654	-4.31114	-1.6367	0.100969	4.39553	6.39067	-4.81757	4.31488	4.19611	6.41575	13.7431	20.6374
																					DR929759	weakly similar to PRF|NP_198139.1|15241079|NP_198139 pectinesterase family protein {Arabidopsis thaliana}, partial (32%)	NA	At5g27870.1	68418.m03343 pectinesterase family protein similar to pectinesterase (EC 3.1.1.11) from Salix gilgiana GI:6714532, Lycopersicon esculentum SP|Q43143, Phaseolus vulgaris SP|Q43111; contains Pfam profile PF010-TRUNCATED-	9.7e-87	9.7e-87	20.6371	-7.94218	-5.0365	-0.237677	1.06267	4.08704	4.87119	-4.09249	2.75025	4.39083	6.89013	14.1753	20.6371
																					DR943316	similar to UP|Q6K881_ORYSA (Q6K881) Phosphatidylinositol 3-and 4-kinase-like, partial (36%)	NA	At1g64460.1	68414.m07308 phosphatidylinositol 3- and 4-kinase family protein contains Pfam profile PF00454: Phosphatidylinositol 3- and 4-kinase	1e-84	1e-84	20.6088	-6.09678	-3.00685	-2.66375	0.720773	6.03403	5.77216	-5.45067	4.95073	3.36358	6.9164	13.1296	20.6088
																					TC16082	weakly similar to UP|Q9VT99_DROME (Q9VT99) CG32062-PD, isoform D, partial (5%)	NA	At5g66870.1	68418.m08430 LOB domain family protein / lateral organ boundaries domain family protein (LBD36) identical to SP|Q9FKZ3 Putative LOB domain protein 36 {Arabidopsis thaliana}; similar to lateral organ boundari-TRUNCATED-	0.0018	0.0018	20.469	-4.2567	-2.97023	-2.14152	-1.2353	4.7395	7.29795	-4.80145	6.31762	4.06072	5.73919	6.69389	20.469
																					TC15441	similar to UP|Q852K2_ORYSA (Q852K2) Expressed protein, partial (81%)	GO:0005515;GO:0009507;GO:0000004	At3g03740.1	68416.m00379 speckle-type POZ protein-related contains Pfam PF00651 : BTB/POZ domain; contains Pfam PF00917: MATH domain; similar to Speckle-type POZ protein (SP:O43791) [Homo sapiens]	7.4e-161	7.4e-161	20.4507	-4.00333	-3.2406	-1.55158	-3.30545	2.92796	6.87342	-4.30986	4.74697	6.42913	4.4054	7.56698	20.4507
																					DR923117	similar to UP|Q85V22_ORYSA (Q85V22) Histidine amino acid transporter, partial (50%)	NA	At1g24400.1	68414.m03076 lysine and histidine specific transporter, putative similar to lysine and histidine specific transporter GI:2576361 from [Arabidopsis thaliana]; contains Pfam profile PF01490: Transmembrane amin-TRUNCATED-	5.6e-91	5.6e-91	20.4233	-7.02283	-2.63608	-2.28591	0.106226	4.12108	7.65657	-3.55349	3.72001	4.50772	7.59472	9.81825	20.4233
																					DT750696	similar to GB|AAL14382.1|16209642|AY057587 At2g21540/F2G1.19 {Arabidopsis thaliana}, partial (35%)	NA	At2g21540.1	68415.m02563 SEC14 cytosolic factor, putative / phosphoglyceride transfer protein, putative similar to phosphatidylinositol transfer-like protein IV (GI:14486707) [Lotus japonicus]; contains Pfam PF00650 : -TRUNCATED-	4.7e-78	4.7e-78	20.3917	-8.52878	-4.12304	-0.833535	0.911793	3.84327	6.2937	-4.13547	3.0306	5.35906	6.30561	11.9971	20.3917
																					TC14494	similar to UP|Q5C9L1_9MAGN (Q5C9L1) (S)-canadine synthase , partial (97%)	NA	At4g22710.1	68417.m03276 cytochrome P450 family protein contains Pfam profile: PF00067 cytochrome p450	3.3e-45	3.3e-45	20.3665	-5.04003	-3.24024	0.036865	-3.23395	2.81002	7.87022	-2.69743	3.3526	4.19586	3.67396	8.45253	20.3665
																					DR914580	weakly similar to UP|Q84RI1_MALDO (Q84RI1) Sorbitol transporter, partial (22%)	NA	At3g18830.1	68416.m02391 mannitol transporter, putative similar to mannitol transporter [Apium graveolens var. dulce] GI:12004316; contains Pfam profile PF00083: major facilitator superfamily protein	3.1e-37	3.1e-37	20.3456	-3.27282	-2.38793	-1.47224	-1.39688	2.98768	4.96102	-2.93195	4.59225	3.86143	4.1771	6.84322	20.3456
																					TC11516	similar to PRF|NP_200884.2|30697428|NP_200884 2-phosphoglycerate kinase-related {Arabidopsis thaliana}, partial (44%)	NA	At5g60760.1	68418.m07623 2-phosphoglycerate kinase-related contains weak similarity to 2-phosphoglycerate kinase (GI:467751) [Methanothermus fervidus]	5.5e-171	5.5e-171	20.3276	-0.45974	-8.96427	-5.77102	1.73388	11.1814	3.31056	-13.8385	8.41352	-0.924802	5.17249	15.662	20.3276
																					DR940787	similar to PRF|NP_173843.2|42562301|NP_173843 armadillo/beta-catenin repeat family protein / U-box domain-containing family protein {Arabidopsis thaliana}, partial (25%)	NA	At1g27910.1	68414.m03420 U-box domain-containing protein contains Pfam profile PF04564: U-box domain	4.2e-93	4.2e-93	20.3051	-3.51905	-2.6427	-2.37728	-1.57702	3.87425	6.08234	-3.56555	5.58263	4.16701	4.7203	7.07065	20.3051
																					TC17413	similar to PRF|NP_176074.2|22330290|NP_176074 expressed protein {Arabidopsis thaliana}, partial (60%)	GO:0000004;GO:0005554;GO:0008372	At1g57610.1	68414.m06537 expressed protein contains Pfam domain, PF04678: Protein of unknown function, DUF607	2.5e-79	2.5e-79	20.2861	-1.98066	-6.59146	-2.12792	-1.31599	7.89757	4.27897	-7.02513	9.80906	3.01731	3.64155	9.35634	20.2861
																					DR919545	weakly similar to UP|Q9LYT5_ARATH (Q9LYT5) Pectinesterase-like protein (AT3g59010/F17J16_60), partial (7%)	NA	At5g27870.1	68418.m03343 pectinesterase family protein similar to pectinesterase (EC 3.1.1.11) from Salix gilgiana GI:6714532, Lycopersicon esculentum SP|Q43143, Phaseolus vulgaris SP|Q43111; contains Pfam profile PF010-TRUNCATED-	1.4e-32	1.4e-32	20.2072	-8.00507	-4.76714	-0.791021	0.950425	4.37184	5.90817	-4.39816	3.51006	4.98924	5.65059	12.2326	20.2072
																					TC19304	similar to PRF|NP_200530.1|15242060|NP_200530 epsin N-terminal homology (ENTH) domain-containing protein / clathrin assembly protein-related {Arabidopsis thaliana}, partial (52%)	GO:0005488;GO:0008372	At5g57200.1	68418.m07145 epsin N-terminal homology (ENTH) domain-containing protein / clathrin assembly protein-related low similarity to clathrin assembly protein AP180 [Xenopus laevis] GI:6492344; contains Pfam profil-TRUNCATED-	1.6e-141	1.6e-141	20.195	-6.86386	-2.84096	-1.61992	-0.438932	3.62871	6.7239	-4.64474	4.91912	4.89153	5.88738	11.9498	20.195
																					DT764696	NA	NA	At5g43560.1	68418.m05325 meprin and TRAF homology domain-containing protein / MATH domain-containing protein weak similarity to ubiquitin-specific protease 12 [Arabidopsis thaliana] GI:11993471; contains Pfam profile PF-TRUNCATED-	0.0025	0.0025	20.1888	-3.54157	-3.20271	-2.23072	-1.5722	4.40643	6.1245	-4.50557	6.19455	1.79294	2.8706	8.0282	20.1888
																					DR944747	weakly similar to UP|GPDM_YEAST (P32191) Glycerol-3-phosphate dehydrogenase, mitochondrial precursor (GPD-M) (GPDH-M) , partial (19%)	NA	At3g10370.1	68416.m01243 glycerol-3-phosphate dehydrogenase, putative similar to glycerol-3-phosphate dehydrogenase GB:BAA08926 from Mus musculus [SP|Q64521], Homo sapiens [GI:1020315], Rattus norvegicus [SP|P35571]; co-TRUNCATED-	3.1e-75	3.1e-75	20.1733	-5.4529	-0.535339	-1.81535	-1.89259	0.952887	5.41836	-1.8209	3.33111	5.27566	4.63219	7.38987	20.1733
																					TC19931	similar to UP|Q4SBC2_TETNG (Q4SBC2) Chromosome 11 SCAF14674, whole genome shotgun sequence. (Fragment), partial (3%)	NA	At5g02420.1	68418.m00165 expressed protein	7.4e-10	7.4e-10	20.108	-0.461771	-2.16924	-6.46503	-1.8801	3.63374	7.23811	-6.18572	10.6425	2.79045	4.59824	7.15121	20.108
																					TC17242	similar to UP|O22616_LYCES (O22616) Ornithine decarboxylase , partial (81%)	NA	At5g11880.1	68418.m01390 diaminopimelate decarboxylase, putative / DAP carboxylase, putative similar to diaminopimelate decarboxylase [Arabidopsis thaliana] GI:6562332; contains Pfam profiles PF02784: Pyridoxal-dependen-TRUNCATED-	7.9e-14	7.9e-14	20.107	-4.86478	-1.52541	-2.51244	-2.42734	2.3202	6.22694	-2.93708	5.0315	6.82426	5.71182	8.50516	20.107
																					DR932819	similar to UP|Q8IC04_PLAF7 (Q8IC04) Heat shock protein 86 family protein, partial (3%)	NA	At1g58120.1	68414.m06589 expressed protein	0.004	0.004	20.0795	-4.72649	-3.30758	-2.1087	-0.723591	4.8247	6.36286	-4.96147	5.22972	4.47433	5.68818	11.5844	20.0795
																					TC16077	similar to PRF|NP_568792.1|18423503|NP_568792 ATP-dependent Clp protease ATP-binding subunit ClpX1 (CLPX) {Arabidopsis thaliana}, partial (64%)	GO:0016887;GO:0005759;GO:0006510	At5g53350.1	68418.m06630 ATP-dependent Clp protease ATP-binding subunit ClpX1 (CLPX) identical to CLP protease regulatory subunit CLPX GI:2674203 from [Arabidopsis thaliana]	6.5e-162	6.5e-162	20.0708	-5.63881	-2.73624	-3.4417	0.699993	4.64582	8.91996	-5.21488	5.60705	4.56761	9.29033	15.416	20.0708
																					TC11464	NA	GO:0009507;GO:0000004;GO:0005554	At5g62990.1	68418.m07903 hypothetical protein	1.3e-116	1.3e-116	20.0643	-3.02724	-1.21106	-2.37658	-3.31911	1.43925	8.73459	-2.66023	6.74801	7.66103	4.4695	6.06822	20.0643
																					DR914581	weakly similar to UP|Q68BJ8_MALDO (Q68BJ8) Sorbitol transporter, partial (37%)	NA	At3g18830.1	68416.m02391 mannitol transporter, putative similar to mannitol transporter [Apium graveolens var. dulce] GI:12004316; contains Pfam profile PF00083: major facilitator superfamily protein	9.2e-82	9.2e-82	20.0131	-4.11649	-2.85365	-2.29845	-1.34982	2.02692	5.31064	-4.12358	5.96316	3.51821	5.28952	7.4093	20.0131
																					TC14415	similar to UP|Q506K3_DATIN (Q506K3) Squalene monooxygenase, partial (87%)	GO:0016126;GO:0004506	At1g58440.1	68414.m06648 squalene monooxygenase, putative / squalene epoxidase, putative similar to SP|O65404 (SE 1,1), SP|O65402 (SE 1,2) 6566341 dbj AB008021.1 AB008021	1.2e-214	1.2e-214	19.9469	-2.45673	-6.70242	-2.61341	-2.14833	7.02851	6.02366	-7.88025	9.92171	2.26958	2.29584	8.44239	19.9469
																					DT763878	similar to UP|Q4QYX3_MANIN (Q4QYX3) Beta-galactosidase (Fragment) , partial (32%)	NA	At1g31740.1	68414.m03894 beta-galactosidase, putative / lactase, putative similar to beta-galactosidase precursor [Brassica oleracea] SWISS-PROT:P49676	1.3e-120	1.3e-120	19.938	-4.06618	-3.21657	-2.43967	-1.77629	4.59966	6.6539	-4.70831	6.34018	5.17973	5.60749	7.67743	19.938
																					TC16550	similar to PRF|NP_850386.1|30689266|NP_850386 epsin N-terminal homology (ENTH) domain-containing protein {Arabidopsis thaliana}, partial (11%)	NA	At3g59290.1	68416.m06609 epsin N-terminal homology (ENTH) domain-containing protein contains Pfam PF01417: ENTH domain. ENTH (Epsin N-terminal homology) domain; similar to Af10-protein - Avena fatua, EMBL:U80041 -TRUNCATED-	7.6e-37	7.6e-37	19.9068	-4.98094	-3.69757	-3.21995	0.936194	3.24836	3.4228	-5.65927	5.45636	2.59206	7.0952	7.95538	19.9068
																					TC9745	weakly similar to PRF|NP_196480.2|30682510|NP_196480 DDT domain-containing protein {Arabidopsis thaliana}, partial (36%)	NA	At5g08630.1	68418.m01026 DDT domain-containing protein low similarity to SP|Q9NRL2 Bromodomain adjacent to zinc finger domain protein 1A (ATP-utilizing chromatin assembly and remodeling factor 1) (ATP-dependent chromati-TRUNCATED-	1.5e-173	1.5e-173	19.8874	-3.30429	-5.95609	-1.55546	-0.737917	7.3022	4.00939	-6.9711	8.43233	2.85095	4.49513	9.608	19.8874
																					TC9056	similar to PRF|NP_191922.1|15236712|NP_191922 NAD-dependent epimerase/dehydratase family protein {Arabidopsis thaliana}, partial (89%)	GO:0009225;GO:0003824;GO:0008372	At4g00110.1	68417.m00011 NAD-dependent epimerase/dehydratase family protein similar to nucleotide sugar epimerase from Vibrio vulnificus GI:3093975 [PID:g3093975], WbnF [Escherichia coli] GI:5739472, CAPI protein {Staph-TRUNCATED-	1.9e-193	1.9e-193	19.8707	-1.05115	-4.17062	-7.51505	-0.414234	10.0272	7.03932	-9.77818	6.34725	0.914616	5.96966	11.7549	19.8707
																					TC11552	weakly similar to PIR|T03932|T03932 pectate lyase Nt59 - common tobacco (fragment) {Nicotiana tabacum} , partial (62%)	NA	At1g14420.1	68414.m01710 pectate lyase family protein similar to pectate lyase P59 SP:P15722 from [Lycopersicon esculentum]	6.6e-72	6.6e-72	19.8682	-8.55514	-3.96082	-0.727262	1.15928	3.73818	5.4705	-3.56337	2.71045	5.2052	7.13562	10.4375	19.8682
																					TC13225	weakly similar to UP|Q9FHX1_ARATH (Q9FHX1) TMV resistance protein-like, partial (6%)	NA	At3g23270.1	68416.m02933 regulator of chromosome condensation (RCC1) family protein contains Pfam domain PF00415: Regulator of chromosome condensation (RCC1); similar to zinc finger protein (GI:15811367) [Arabidopsis th-TRUNCATED-	5.1e-26	5.1e-26	19.8679	-4.03436	-3.93706	-3.98331	0.649268	7.27409	6.73024	-6.83443	5.64576	3.44005	7.5055	12.9567	19.8679
																					TC11285	similar to UP|Q6Z7V1_ORYSA (Q6Z7V1) LMBR1 integral membrane protein-like, partial (7%)	NA	At5g65290.1	68418.m08212 LMBR1 integral membrane family protein contains Pfam PF04791: LMBR1-like conserved region	2e-54	2e-54	19.8414	-5.4805	-3.15008	-2.63983	-0.180772	2.51578	5.80368	-4.36878	5.125	4.2919	5.72121	10.2375	19.8414
																					TC16081	similar to UP|AS2_ARATH (Q9FKZ3) ASYMMETRIC LEAVES2 protein (LOB domain protein 36), partial (38%)	GO:0000004;GO:0008372;GO:0005554	At5g66870.1	68418.m08430 LOB domain family protein / lateral organ boundaries domain family protein (LBD36) identical to SP|Q9FKZ3 Putative LOB domain protein 36 {Arabidopsis thaliana}; similar to lateral organ boundari-TRUNCATED-	5.4e-61	5.4e-61	19.8408	-4.21903	-3.37476	-3.96834	-2.66146	4.69161	3.04277	-3.78072	6.13938	6.09126	7.26775	11.2043	19.8408
																					DT748774	UP|Q94TA9_9TEL (Q94TA9) NADH dehydrogenase subunit 5, partial (1%)	NA	At2g02030.1	68415.m00138 F-box family protein contains F-box domain Pfam:PF00646	6e-05	6e-05	19.8356	-0.139827	-3.70286	-4.62693	-1.78724	3.86744	5.95976	-6.43924	8.90243	1.09053	3.75208	7.03181	19.8356
																					TC9707	NA	NA	At4g36600.1	68417.m05195 late embryogenesis abundant domain-containing protein / LEA domain-containing protein low similarity to SP|P20075 Embryonic protein DC-8 {Daucus carota}; contains Pfam profile PF02987: Late embr-TRUNCATED-	1.7e-07	1.7e-07	19.8331	-12.7659	-5.06965	0.355239	3.00446	4.21325	4.98092	-4.45911	1.75547	6.98053	9.19656	12.8198	19.8331
																					DT754157	weakly similar to UP|Q9FJ21_ARATH (Q9FJ21) Pectin methylesterase (AT5g49180/K21P3_5), partial (39%)	NA	At3g05610.1	68416.m00623 pectinesterase family protein contains Pfam profile: PF01095 pectinesterase	5.6e-98	5.6e-98	19.8038	-6.68844	-5.06912	-1.01969	0.600173	4.5745	6.05628	-4.79123	4.34227	4.59954	6.30743	13.365	19.8038
																					TC14335	weakly similar to UP|Q84TL6_MAIZE (Q84TL6) Legumin-like protein, partial (29%)	NA	At2g28680.1	68415.m03486 cupin family protein similar to legumin (11S-globulin) from Ginkgo biloba [GI:949869], 11S globulin from Avena sativa [GI:472867]; contains a 11-S plant seed storage protein signature (PS00305) -TRUNCATED-	5.6e-91	5.6e-91	19.7637	-3.13738	-6.5258	-6.83869	2.94972	13.1604	5.3791	-11.1408	7.77949	0.246501	7.38708	18.8966	19.7637
																					TC19384	weakly similar to PRF|NP_188554.1|15230320|NP_188554 leucine-rich repeat family protein {Arabidopsis thaliana}, partial (27%)	NA	At3g19230.1	68416.m02440 leucine-rich repeat family protein contains Pfam profile:PF00560 LRR:Leucine Rich Repeat domains; similar to light repressible receptor protein kinase (GI:1321686)[Arabidopsis thaliana] -TRUNCATED-	1.9e-88	1.9e-88	19.7617	-5.90231	-5.36177	-1.10401	0.866778	4.9285	5.77943	-5.10629	4.18321	4.06962	5.65788	13.6576	19.7617
																					TC19918	weakly similar to PRF|NP_200058.1|15237158|NP_200058 MATE efflux protein-related {Arabidopsis thaliana}, partial (53%)	GO:0005215;GO:0016020	At5g52450.1	68418.m06508 MATE efflux protein-related strong similarity to unknown protein (pir||T02324); contains Pfam profile PF01554 Uncharacterized membrane protein family	2.2e-96	2.2e-96	19.6695	-1.74622	-4.77578	-1.91095	-5.24844	4.90055	7.59243	-5.59121	11.7145	5.62367	3.06612	7.52368	19.6695
																					DR918921	similar to GB|AAF22293.1|6651403|AF180734 dynamin-like protein 5 {Arabidopsis thaliana}, partial (30%)	NA	At1g14830.1	68414.m01774 dynamin-like protein C (DL1C) nearly identical to dynamin-like protein C [Arabidopsis thaliana] GI:19569772	1.3e-77	1.3e-77	19.6412	-1.23779	-3.31531	-4.38025	-2.29702	7.08826	7.14085	-6.84483	8.74094	3.17261	5.23254	7.67057	19.6412
																					TC16214	weakly similar to PRF|NP_196797.1|15239942|NP_196797 expressed protein {Arabidopsis thaliana}, partial (28%)	NA	At5g12930.1	68418.m01483 expressed protein	1.3e-68	1.3e-68	19.6104	5.19179	-9.8726	-6.64794	-2.48281	13.7944	3.6408	-15.1813	17.0071	-1.44625	0.948742	8.35302	19.6104
																					TC14269	similar to UP|Q9LW72_ARATH (Q9LW72) L-asparaginase (L-asparagine amidohydrolase), complete	GO:0004067;GO:0006516;GO:0008372	At3g16150.1	68416.m02039 L-asparaginase, putative / L-asparagine amidohydrolase, putative similar to Swiss-Prot:P30364 L-asparaginase (EC 3.5.1.1) (L-asparagine amidohydrolase) [Lupinus angustifolius]	4.7e-149	4.7e-149	19.4859	-3.11162	3.38255	-5.86013	-5.95243	1.74349	18.1709	-1.70111	7.50673	8.13155	7.28495	3.95565	19.4859
																					TC19889	NA	NA	At5g20690.1	68418.m02457 leucine-rich repeat transmembrane protein kinase, putative receptor-like protein kinase PRK1, tomato, PIR:T07865	0.0011	0.0011	19.4851	-6.3286	-4.09196	-0.888851	-0.0612626	2.61528	5.66443	-4.13761	4.15482	5.0065	5.53415	10.3951	19.4851
																					TC19607	weakly similar to PRF|NP_197801.1|15237898|NP_197801 expressed protein {Arabidopsis thaliana}, partial (84%)	GO:0005554	At5g24130.1	68418.m02837 expressed protein	6.8e-86	6.8e-86	19.484	-4.48268	-3.28065	-2.33337	-2.38368	4.64724	6.94156	-5.00881	6.74582	5.13727	5.30483	9.61131	19.484
																					TC12150	weakly similar to PRF|NP_177057.2|30697764|NP_177057 expressed protein {Arabidopsis thaliana}, partial (22%)	NA	At5g11390.1	68418.m01329 expressed protein	7.2e-66	7.2e-66	19.4635	-1.35292	-2.61508	-6.4264	-1.42148	6.62854	8.42261	-7.27383	9.98873	2.11263	6.09253	8.26058	19.4635
																					TC17360	similar to PRF|NP_200860.1|15239359|NP_200860 late embryogenesis abundant protein-related / LEA protein-related {Arabidopsis thaliana}, partial (90%)	GO:0005554	At5g60520.1	68418.m07589 late embryogenesis abundant protein-related / LEA protein-related similar to late embryogenesis abundant protein [Picea glauca] GI:1350543	3.8e-131	3.8e-131	19.4423	-4.43366	-3.50184	-1.49686	-2.9202	3.85365	9.2323	-3.97855	6.54415	6.66289	5.66543	6.36062	19.4423
																					TC16980	weakly similar to PRF|NP_187791.1|15229868|NP_187791 expressed protein {Arabidopsis thaliana}, partial (27%)	NA	At5g06560.1	68418.m00740 expressed protein contains Pfam profile PF04576: Protein of unknown function, DUF593	5.7e-89	5.7e-89	19.417	-2.87935	-2.59236	-2.05281	-2.08381	3.84741	6.33887	-4.3462	6.25384	3.6826	4.01203	8.18288	19.417
																					TC19740	NA	NA	At4g00530.1	68417.m00073 hypothetical protein	7.3	0.9993	19.3864	-2.69547	-2.98914	-2.77579	-1.24767	4.63043	5.74983	-4.80984	6.60382	3.17188	4.5115	8.5672	19.3864
																					DR942529	similar to UP|Q7Y0V3_LILLO (Q7Y0V3) Actin filament bundling protein P-115-ABP, partial (30%)	NA	At4g30160.1	68417.m04289 villin, putative similar to villin 2 (VLN2) [Arabidopsis thaliana] GI:3415115, villin 3 (VLN3) [Arabidopsis thaliana] GI:3415117; contains Pfam profiles PF00626: Gelsolin repeat, PF02209: Villi-TRUNCATED-	8.6e-118	8.6e-118	19.309	-3.46994	-2.91979	-2.37698	-0.395063	5.26328	5.20691	-3.22378	5.73022	3.00986	5.2866	7.78564	19.309
																					DT765694	similar to PRF|NP_188980.1|15229436|NP_188980 p21-rho-binding domain-containing protein {Arabidopsis thaliana}, partial (28%)	NA	At2g20430.1	68415.m02384 p21-rho-binding domain-containing protein contains Pfam PF00786: P21-Rho-binding domain	4.7e-23	4.7e-23	19.2987	-6.66698	-4.32788	-1.21592	0.178123	4.58888	5.98315	-3.73011	4.07742	4.97397	6.60913	10.6961	19.2987
																					TC11413	similar to PRF|NP_190414.1|15228379|NP_190414 zinc finger (CCCH-type) family protein {Arabidopsis thaliana}, partial (22%)	NA	At2g47850.1	68415.m05972 zinc finger (CCCH-type) family protein contains Pfam domain, PF00642: Zinc finger C-x8-C-x5-C-x3-H type (and similar)	9e-52	9e-52	19.2789	-5.0593	-2.21032	-1.59187	-1.38934	2.65761	7.87819	-3.03686	4.16772	4.04265	4.98271	9.31354	19.2789
																					TC19413	similar to PRF|NP_194472.2|22328974|NP_194472 ABC transporter family protein {Arabidopsis thaliana}, partial (27%)	NA	At4g27420.1	68417.m03941 ABC transporter family protein D.melanogaster P element CaSpeR-1 gene (white protein),PID:g870996	1.7e-78	1.7e-78	19.2212	-6.96332	-2.54419	-2.14872	0.487688	4.09205	7.87827	-4.4159	2.96068	5.42361	7.16332	11.2483	19.2212
																					DR951695	weakly similar to UP|CBL10_ARATH (Q9LJU0) COBRA-like protein 10 precursor, partial (32%)	NA	At3g20580.1	68416.m02605 phytochelatin synthetase-related contains Pfam PF04833: Phytochelatin synthetase-like conserved region; supporting cDNA gi|26452232|dbj|AK118605.1|	6.7e-79	6.7e-79	19.1217	-7.5812	-4.7194	-0.863852	0.574987	4.16353	6.14794	-4.26185	3.59662	5.30462	6.5548	13.8334	19.1217
																					TC9647	homologue to UP|ADT1_ARATH (P31167) ADP,ATP carrier protein 1, mitochondrial precursor (ADP/ATP translocase 1) (Adenine nucleotide translocator 1) (ANT 1), partial (88%)	GO:0006810;GO:0005743;GO:0005739;GO:0005488;GO:0006854;GO:0005471;GO:0006839;GO:0009060	At5g13490.1	68418.m01556 ADP, ATP carrier protein 2, mitochondrial / ADP/ATP translocase 2 / adenine nucleotide translocator 2 (ANT2) identical to SWISS-PROT:P40941 ADP,ATP carrier protein 2, mitochondrial precursor (Ad-TRUNCATED-	1.4e-165	1.4e-165	19.0591	-5.46458	-1.36552	-4.39489	-1.42531	4.52328	10.0609	-4.54047	4.32972	6.01006	7.70802	10.3544	19.0591
																					DT737945	similar to UP|DHEA_NICPL (O04937) Glutamate dehydrogenase A (GDH A) , partial (52%)	NA	At5g07440.1	68418.m00851 glutamate dehydrogenase 2 (GDH2) identical to glutamate dehydrogenase 2 (GDH 2) [Arabidopsis thaliana] SWISS-PROT:Q38946	1.4e-92	1.4e-92	18.9062	-5.37949	-3.80265	-2.24283	-0.889807	5.43668	6.80409	-5.13565	5.96096	4.80525	6.01241	11.1982	18.9062
																					DT747082	weakly similar to PRF|NP_198758.2|22327464|NP_198758 protein kinase family protein {Arabidopsis thaliana}, partial (4%)	NA	At1g74325.1	68414.m08607 expressed protein ; expression supported by MPSS	2.7e-09	2.7e-09	18.8964	1.50087	-5.19057	-4.52697	-2.64541	9.26472	4.58526	-9.43892	10.3562	1.01593	1.88405	5.42043	18.8964
																					DR947132	similar to PRF|NP_188689.1|15232294|NP_188689 protein kinase family protein {Arabidopsis thaliana}, partial (36%)	NA	At3g20530.1	68416.m02599 protein kinase family protein contains protein kinase domain, Pfam:PF00069	2.3e-60	2.3e-60	18.8823	-4.33485	-4.08524	-1.83919	-0.356154	5.06912	6.87323	-3.75972	5.56528	4.57141	6.45832	9.24568	18.8823
																					TC19619	similar to UP|Q5Y9B9_GOSHI (Q5Y9B9) MADS9 protein, partial (62%)	GO:0003677	At5g13790.1	68418.m01608 floral homeotic protein AGL-15 (AGL15)	5.2e-56	5.2e-56	18.8734	-3.29238	-1.11835	-7.42944	-0.0228551	6.44914	7.9719	-6.68374	6.62714	2.43107	10.0558	12.6635	18.8734
																					DT754158	similar to PRF|NP_191841.1|15229333|NP_191841 invertase/pectin methylesterase inhibitor family protein {Arabidopsis thaliana}, partial (10%)	NA	At3g05610.1	68416.m00623 pectinesterase family protein contains Pfam profile: PF01095 pectinesterase	4.6e-55	4.6e-55	18.8032	-6.32658	-4.72485	-1.02186	0.179405	4.42116	6.35654	-4.12017	4.17252	4.43869	6.28638	12.953	18.8032
																					TC19297	similar to UP|O23959_SOYBN (O23959) Ca+2-binding EF hand protein, partial (91%)	GO:0000004;GO:0005509;GO:0009269;GO:0008372	At4g26740.1	68417.m03853 embryo-specific protein 1 (ATS1) identical to embryo-specific protein 1 [Arabidopsis thaliana] GI:3335169	1.3e-91	1.3e-91	18.7718	-4.78654	-3.84123	-0.618631	-1.62761	4.14678	4.20437	-3.5016	4.24098	4.85469	4.35287	9.02419	18.7718
																					TC14208	similar to UP|Q8H1X7_BETVE (Q8H1X7) Microsomal omega-3 fatty acid desaturase, partial (92%)	GO:0009266;GO:0042389	At5g05580.1	68418.m00606 omega-3 fatty acid desaturase, chloroplast, temperature-sensitive (FAD8) identical to SP:48622 Temperature-sensitive omega-3 fatty acid desaturase, chloroplast precursor (EC 1.14.19.-) {Arabidop-TRUNCATED-	4.5e-161	4.5e-161	18.7472	-5.88679	1.87614	-9.5464	-0.577597	4.76997	13.3517	-4.13168	3.62882	4.00799	13.8483	11.251	18.7472
																					TC19408	weakly similar to UP|Q9SFG3_ARATH (Q9SFG3) F2O10.5 protein (At3g05990), partial (25%)	NA	At3g19230.1	68416.m02440 leucine-rich repeat family protein contains Pfam profile:PF00560 LRR:Leucine Rich Repeat domains; similar to light repressible receptor protein kinase (GI:1321686)[Arabidopsis thaliana] -TRUNCATED-	3.8e-53	3.8e-53	18.7436	-7.61885	-5.22277	-0.845946	0.839189	4.38663	5.05794	-4.647	4.03198	4.91347	5.53343	12.686	18.7436
																					DT748577	similar to UP|RHM3_ARATH (Q9LH76) Probable rhamnose biosynthetic enzyme 3 , partial (31%)	NA	At3g14790.1	68416.m01869 NAD-dependent epimerase/dehydratase family protein similar to dTDP-glucose 4,6-dehydratase from Aneurinibacillus thermoaerophilus GI:16357461, Saccharopolyspora spinosa GI:15077647, RmlB from Le-TRUNCATED-	6.7e-95	6.7e-95	18.6795	-3.22367	-3.24498	-2.62748	-1.25366	4.49161	5.69291	-4.92529	6.69358	3.68587	4.06538	8.71338	18.6795
																					DT734672	similar to GB|CAB80758.1|7269025|ATCHRIV6 predicted protein destination factor {Arabidopsis thaliana}, partial (23%)	NA	At1g03050.1	68414.m00277 epsin N-terminal homology (ENTH) domain-containing protein / clathrin assembly protein-related contains Pfam PF01417: ENTH domain. ENTH (Epsin N-terminal homology) domain; similar to CLATHRIN CO-TRUNCATED-	2.2e-64	2.2e-64	18.6672	-7.1893	-3.47279	-0.964976	0.0175586	3.38118	5.2271	-3.42884	3.0332	4.4506	5.82969	11.297	18.6672
																					DR948448	NA	NA	At1g55070.1	68414.m06290 F-box family protein contains Pfam profile: PF00646 F-box domain	3.8	0.98	18.6255	-3.89429	-2.0871	-1.77679	-1.98345	3.7594	5.91279	-3.20563	5.85866	5.39212	5.45276	7.36687	18.6255
																					TC16986	homologue to PRF|NP_197631.1|15242230|NP_197631 expressed protein {Arabidopsis thaliana}, partial (10%)	NA	At5g22390.1	68418.m02612 expressed protein	3e-21	3e-21	18.6173	-5.52903	-1.97396	-1.89803	-1.51968	3.47259	9.20504	-2.79091	4.27977	6.4504	6.52924	8.73461	18.6173
																					DR929318	homologue to PRF|NP_850475.1|30690701|NP_850475 kinesin motor protein-related {Arabidopsis thaliana}, partial (3%)	NA	At2g47500.1	68415.m05929 kinesin motor protein-related	4.2e-12	4.2e-12	18.5564	-4.34291	-4.85077	-3.36725	1.37599	6.17427	4.80183	-4.49998	5.67676	2.32132	6.74464	12.2723	18.5564
																					DR929760	weakly similar to PRF|NP_850077.1|30683114|NP_850077 pectinesterase family protein {Arabidopsis thaliana}, partial (4%)	NA	At3g05610.1	68416.m00623 pectinesterase family protein contains Pfam profile: PF01095 pectinesterase	9.1e-39	9.1e-39	18.5325	-5.77402	-3.39621	-1.18897	-0.0474567	3.37203	5.89951	-3.68569	3.84844	4.21557	5.54828	10.5342	18.5325
																					TC15561	weakly similar to UP|Q9LVQ4_ARATH (Q9LVQ4) Myosin heavy chain-like, partial (61%)	GO:0005554	At5g55860.1	68418.m06963 expressed protein contains Pfam profile PF05701: Plant protein of unknown function (DUF827); expression supported by MPSS	5.8e-167	5.8e-167	18.5182	-2.65157	-4.16277	-3.22329	-1.35189	4.43595	8.3036	-5.80111	6.83481	4.41	7.34422	11.513	18.5182
																					TC17298	NA	GO:0000004;GO:0005554;GO:0008372	At1g27990.1	68414.m03428 expressed protein	8.1e-90	8.1e-90	18.4943	-4.16634	-2.67934	-1.36677	-2.18038	3.41212	5.9658	-2.57508	5.66451	3.98345	4.55402	6.4817	18.4943
																					TC11974	similar to PRF|NP_196700.2|30683605|NP_196700 expressed protein {Arabidopsis thaliana}, partial (8%)	NA	At5g11390.1	68418.m01329 expressed protein	9e-52	9e-52	18.4841	-0.393281	-2.2995	-5.16372	-2.21236	5.70837	7.03519	-5.54106	7.63345	2.24657	4.8083	6.03777	18.4841
																					DT748576	similar to UP|RHM1_ARATH (Q9SYM5) Probable rhamnose biosynthetic enzyme 1 , partial (12%)	NA	At1g78570.1	68414.m09157 NAD-dependent epimerase/dehydratase family protein similar to dTDP-glucose 4,6-dehydratase from Aneurinibacillus thermoaerophilus GI:16357461, RmlB from Leptospira borgpetersenii GI:4234803; con-TRUNCATED-	6.3e-33	6.3e-33	18.4684	-3.19612	-3.60731	-2.01881	-1.25952	4.55894	5.95952	-4.51294	5.5681	4.04735	4.73451	8.62508	18.4684
																					TC10670	similar to UP|Q8LGJ6_ARATH (Q8LGJ6) Phosphoglycerate dehydrogenase-like protein, partial (75%)	GO:0009507;GO:0004617;GO:0006564;GO:0005739	At4g34200.1	68417.m04854 D-3-phosphoglycerate dehydrogenase, putative / 3-PGDH, putative similar to phosphoglycerate dehydrogenase, Arabidopsis thaliana, SP:O04130	4.8e-204	4.8e-204	18.4086	1.16705	-5.60251	-6.47609	-0.687546	10.8463	2.59784	-11.7839	13.6925	-0.164585	2.1029	7.25024	18.4086
																					TC10704	weakly similar to PRF|NP_173079.2|30684789|NP_173079 expressed protein {Arabidopsis thaliana}, partial (87%)	GO:0000004;GO:0005554;GO:0008372	At1g16290.1	68414.m01950 expressed protein	5.8e-133	5.8e-133	18.407	-4.55849	-3.09592	-5.14924	-0.725974	7.43042	8.613	-5.72973	8.62377	2.83382	7.52004	11.8718	18.407
																					DT751203	NA	NA	At3g04810.2	68416.m00521 protein kinase, putative similar to LSTK-1-like kinase [Lycopersicon esculentum] GI:15637110; contains Pfam profile: PF00069 Eukaryotic protein kinase domain	0.64	0.47	18.3641	-5.16097	-2.83565	-0.279818	-2.02776	2.08359	6.42679	-2.40863	4.29978	5.78568	3.59334	6.56693	18.3641
																					TC11553	similar to UP|PEL_LILLO (P40973) Pectate lyase precursor , partial (44%)	NA	At3g01270.1	68416.m00033 pectate lyase family protein similar to pectate lyase P59 SP:P15722 from [Lycopersicon esculentum]	1.5e-74	1.5e-74	18.3222	-8.91872	-4.1154	-0.263881	1.22729	3.70516	5.38951	-3.93621	2.73684	5.01913	6.63193	10.5256	18.3222
																					DR925710	similar to PRF|NP_176303.1|15219860|NP_176303 proline-rich family protein {Arabidopsis thaliana}, partial (4%)	NA	At1g61080.1	68414.m06877 proline-rich family protein	1.3e-13	1.3e-13	18.3123	-4.17798	-2.93218	-2.48429	-1.26155	4.87075	7.02864	-4.69239	5.72872	4.31955	5.75995	9.46951	18.3123
																					DR947133	similar to UP|Q6TKQ5_VITAE (Q6TKQ5) Protein kinase-like protein, partial (32%)	NA	At3g20530.1	68416.m02599 protein kinase family protein contains protein kinase domain, Pfam:PF00069	1.2e-56	1.2e-56	18.2702	-4.51875	-3.32961	-2.04144	-0.544799	4.97486	6.6539	-4.8447	5.33119	4.15158	4.54264	9.77647	18.2702
																					TC12848	similar to PRF|NP_567173.3|42566185|NP_567173 MATE efflux family protein {Arabidopsis thaliana}, partial (51%)	NA	At4g00350.1	68417.m00046 MATE efflux family protein similar to ripening regulated protein DDTFR18 [Lycopersicon esculentum] GI:12231296; contains Pfam profile PF01554 Uncharacterized membrane protein family	1e-107	1e-107	18.2673	-5.26716	-3.33342	-3.08711	0.706877	5.57056	7.14194	-6.35071	5.71049	3.58325	7.66161	15.1485	18.2673
																					TC8291	similar to UP|Q8VYI1_ARATH (Q8VYI1) At1g69640/F24J1.22, partial (65%)	GO:0003824	At1g69640.1	68414.m08012 acid phosphatase, putative similar to GI:5360721 from [Lupinus albus]	3.2e-95	3.2e-95	18.2375	1.51295	-4.88554	-7.01618	-3.01452	7.78424	6.33721	-9.95953	11.3137	0.863555	2.38093	6.96952	18.2375
																					TC12306	similar to UP|Q9ZWM6_GOSHI (Q9ZWM6) Adenylyl cyclase associated protein, partial (46%)	NA	At4g34490.1	68417.m04903 cyclase-associated protein (cap1) identical to cyclase-associated protein (cap1) GI:3169136 from [Arabidopsis thaliana]	2.5e-88	2.5e-88	18.231	-3.20164	-2.23878	-2.38778	-2.08104	3.86881	7.08078	-4.53231	6.98841	4.08604	4.63126	6.30063	18.231
																					DR945360	similar to PRF|NP_187088.2|22330839|NP_187088 SET domain-containing protein (SUVR4) {Arabidopsis thaliana}, partial (36%)	NA	At3g04380.1	68416.m00463 SET domain-containing protein (SUVR4) nearly identical to Su(VAR)3-9-related protein 4 [Arabidopsis thaliana] GI:17066863; contains Pfam profiles PF00856: SET domain, PF05033: Pre-SET motif; ide-TRUNCATED-	1.5e-81	1.5e-81	18.2158	1.85994	-3.60553	-4.78782	-4.40656	7.70248	5.45212	-7.58501	8.05014	0.980915	2.18836	4.95188	18.2158
																					TC13803	NA	GO:0005554	At1g02860.1	68414.m00251 SPX (SYG1/Pho81/XPR1) domain-containing protein / zinc finger (C3HC4-type RING finger) protein-related weak similarity to tripartite motif protein TRIM13 [Mus musculus] GI:12407427, gpStaf50 [Ho-TRUNCATED-	8.5e-111	8.5e-111	18.1002	-4.43141	-5.3303	-2.83832	1.85103	7.50275	5.85902	-7.30686	5.42917	2.00117	6.19995	15.2372	18.1002
																					TC17532	similar to PRF|NP_194536.2|42567204|NP_194536 AFG1-like ATPase family protein {Arabidopsis thaliana}, partial (37%)	NA	At4g30490.1	68417.m04329 AFG1-like ATPase family protein contains Pfam profile: PF03969 AFG1-like ATPase	8.5e-63	8.5e-63	18.0974	-2.40963	-3.01448	-2.23122	-2.79085	2.02877	6.85157	-3.42217	7.82763	4.64125	3.53106	4.4995	18.0974
																					TC16441	similar to UP|NIP1_NICAL (P49173) Probable aquaporin NIP-type (Pollen-specific membrane integral protein), partial (87%)	GO:0006810;GO:0015250;GO:0016020	At5g37820.1	68418.m04554 major intrinsic family protein / MIP family protein contains Pfam profile: PF00230 major intrinsic protein (MIP)	3.1e-90	3.1e-90	18.0917	-11.2837	-4.57172	-0.132333	1.7961	3.64724	6.26469	-3.70885	2.44577	3.7522	6.14524	15.705	18.0917
																					DR913724	similar to UP|Q9LHJ9_ARATH (Q9LHJ9) Protein phosphatase 2C (At3g12620), partial (28%)	NA	At3g55050.1	68416.m06113 serine/threonine protein phosphatase 2C (PP2C6) identical to Ser/Thr protein phosphatase 2C (PP2C6) (GI:15020818) [Arabidopsis thaliana]; similar to protein phosphatase 2C (GI:3608412) [Mesembry-TRUNCATED-	1.7e-43	1.7e-43	18.0682	-4.3111	-1.8926	-1.19361	-2.70289	2.07539	5.18037	-1.7681	5.10314	5.63844	3.80456	5.46309	18.0682
																					TC8572	similar to UP|Q9M4Q9_RICCO (Q9M4Q9) NADP-dependent malic protein , partial (92%)	GO:0004470;GO:0006108;GO:0016652;GO:0008372	At1g79750.1	68414.m09304 malate oxidoreductase, putative similar to malate oxidoreductase (NADP-dependent malic enzyme) GB:P34105 (Populus balsamifera subsp. trichocarpa)	1.4e-268	1.4e-268	17.9999	1.77841	-9.73384	-4.2371	-2.74159	12.4974	2.88436	-11.9173	15.338	0.22926	1.28533	9.16955	17.9999
																					DT742513	similar to UP|Q72N21_LEPI (Q72N21) Acriflavine resistance, partial (1%)	NA	At3g25750.1	68416.m03206 F-box family protein contains F-box domain Pfam:PF00646	5.9e-14	5.9e-14	17.9348	-4.6518	-2.88308	-1.06147	-1.52891	3.32662	6.48106	-3.29464	3.03539	4.30995	4.45136	7.92085	17.9348
																					TC10861	similar to UP|P93356_TOBAC (P93356) LIM-domain SF3 protein (LIM domain protein WLIM2), partial (94%)	GO:0000004;GO:0008372	At1g01780.1	68414.m00097 LIM domain-containing protein similar to PGPS/D1 [Petunia x hybrida] GI:4105772, LIM domain protein PLIM1 [Nicotiana tabacum] GI:5932418; contains Pfam profile PF00412: LIM domain	1.8e-76	1.8e-76	17.9272	-7.8162	-4.5019	0.0996974	1.49166	3.49901	4.64894	-3.15038	2.58509	5.48109	6.26662	13.6694	17.9272
																					DR924756	weakly similar to UP|Q5VRG9_ORYSA (Q5VRG9) Dehydration-responsive protein-like, partial (8%)	NA	At1g33170.1	68414.m04096 dehydration-responsive family protein similar to early-responsive to dehydration stress ERD3 protein [Arabidopsis thaliana] GI:15320410; contains Pfam profile PF03141: Putative methyltransferase-TRUNCATED-	1.1e-31	1.1e-31	17.9185	0.212988	-6.43276	-2.52364	-2.08529	7.88822	3.54365	-8.1533	9.75087	1.39104	1.80224	7.84882	17.9185
																					TC13662	homologue to UP|Q8YK01_ANASP (Q8YK01) Alr8529 protein, partial (6%)	NA	At5g07330.1	68418.m00837 expressed protein	1.1e-20	1.1e-20	17.917	-6.25836	-4.6506	-1.2298	0.433663	4.20652	6.50018	-3.31842	3.66305	4.9271	6.06927	11.6592	17.917
																					TC14984	NA	NA	At1g57680.1	68414.m06545 expressed protein	9.1e-30	9.1e-30	17.8872	-6.02844	-1.3883	-2.66599	-3.02139	2.87048	8.43958	-3.37496	5.18599	7.93473	7.35813	8.29671	17.8872
																					TC12875	similar to PRF|NP_200530.1|15242060|NP_200530 epsin N-terminal homology (ENTH) domain-containing protein / clathrin assembly protein-related {Arabidopsis thaliana}, partial (13%)	NA	At4g25940.1	68417.m03731 epsin N-terminal homology (ENTH) domain-containing protein contains Pfam PF01417: ENTH domain. ENTH (Epsin N-terminal homology) domain; similar to Chain B, Crystal Structure Of N-Terminal Domai-TRUNCATED-	2.2e-38	2.2e-38	17.8648	-6.86709	-4.04214	-0.856877	0.8298	3.95549	6.19587	-3.69117	2.81282	5.70219	6.90493	11.7865	17.8648
																					TC13567	weakly similar to UP|O15121_HUMAN (O15121) MLD (Degenerative spermatocyte homolog 1, lipid desaturase) (Migration-inducing gene 15 protein) (Sphingolipid delta 4 desaturase protein DES1), partial (50%)	GO:0005887;GO:0016717;GO:0005783;GO:0016491;GO:0005624;GO:0006636;GO:0016020;GO:0005489;GO:0008372	At4g04930.1	68417.m00717 fatty acid desaturase family protein similar to D. melanogaster Des-1 protein, GenBank accession number X94180; contains Pfam profile PF00487 Fatty acid desaturase domain	2e-150	2e-150	17.8605	-6.86341	-5.45499	-0.916724	0.595266	4.61263	6.57986	-5.01565	4.3736	5.97683	6.84086	13.0981	17.8605
																					DT745241	homologue to OMNI|NTL01CV3516|AAQ61177.1|34104820| phosphoserine phosphatase {Chromobacterium violaceum ATCC 12472}, partial (6%)	NA	NA	NA	NA	NA	17.8466	-4.09419	-1.92333	-1.57159	-2.97892	2.81373	8.27613	-2.28082	3.47983	6.78228	2.70626	6.72301	17.8466
																					DR945361	NA	NA	At5g43990.1	68418.m05383 SET domain-containing protein identical to SET domain protein SUVR2 [Arabidopsis thaliana] GI:15290521; contains Pfam profiles PF00856: SET domain, PF05033: Pre-SET motif; identical to cDNA SET -TRUNCATED-	2.6e-07	2.6e-07	17.7888	0.525823	-2.9595	-3.13101	-3.35946	2.80105	3.8729	-3.02766	7.04854	2.06567	2.28193	3.3838	17.7888
																					TC19604	weakly similar to UP|Q8H990_ORYSA (Q8H990) PHD-finger family homeodomain protein (Fragment), partial (5%)	NA	At4g29940.1	68417.m04259 pathogenesis-related homeodomain protein (PRHA) identical to Pathogenesis-related homeodomain protein (PRHA) (SP:P48785) [Arabidopsis thaliana)	1.1e-07	1.1e-07	17.7606	0.743685	-5.3576	-4.42662	-3.15462	8.10774	3.78607	-6.55608	11.7824	1.85822	2.864	6.06278	17.7606
																					TC20013	weakly similar to GB|CAC83650.1|18056482|ATH310357 CDC6b protein {Arabidopsis thaliana}, partial (38%)	NA	At2g29680.2	68415.m03608 cell division control protein CDC6, putative almost identical to DNA replication protein CDC6 GI:18056480 from [Arabidopsis thaliana]; identical to cDNA CDC6 protein (2g29680 gene) GI:18056479 -TRUNCATED-	3.4e-75	3.4e-75	17.7451	-2.89581	-3.69409	-2.67596	-1.04607	5.40019	5.39613	-5.02985	7.07393	2.8924	5.40982	7.94403	17.7451
																					TC9450	similar to UP|ZFNL_PEA (Q9SWF9) Zinc finger CCCH type domain containing protein ZFN-like, partial (77%)	GO:0003676;GO:0000004;GO:0008372	At3g02830.1	68416.m00275 zinc finger (CCCH-type) family protein contains Pfam domain, PF00642: Zinc finger C-x8-C-x5-C-x3-H type (and similar)	2e-113	2e-113	17.7031	-7.23953	-0.827103	-0.47975	-3.26702	0.998582	11.3794	-1.02826	4.09875	7.54937	6.31164	5.19766	17.7031
																					TC9417	similar to UP|O48628_PRUAR (O48628) Pyrophosphate-dependent phosphofructo-1-kinase (Fragment), partial (95%)	GO:0005945;GO:0003872;GO:0006096	At4g26270.1	68417.m03780 phosphofructokinase family protein similar to phosphofructokinase [Amycolatopsis methanolica] GI:17432243; contains Pfam profile PF00365: Phosphofructokinase	7e-116	7e-116	17.6812	-1.35499	-2.20949	-2.25563	-2.34873	3.92622	6.09287	-4.67135	4.89177	2.19722	2.58575	6.23164	17.6812
																					DR946749	similar to UP|EXG_ASPOR (Q7Z9L3) Glucan 1,3-beta-glucosidase precursor (Exo-1,3-beta-glucanase) , partial (6%)	NA	NA	NA	NA	NA	17.6737	-2.56149	-3.66322	-1.92445	-1.14047	4.62125	5.6834	-3.48254	5.94182	3.66367	4.74941	8.52526	17.6737
																					TC14071	similar to UP|Q944P2_9LILI (Q944P2) 14-3-3 protein, partial (94%)	GO:0007264;GO:0000074;GO:0007265;GO:0004860;GO:0007088;GO:0007444;GO:0000077;GO:0008426;GO:0005737;GO:0000079;GO:0004863;GO:0008355;GO:0003779;GO:0004864;GO:0008283;GO:0006469;GO:0031031;GO:0016483;GO:0007010;GO:0045448;GO:0016597;GO:0007124;GO:0008104;GO:0007126;GO:0045664;GO:0030528;GO:0007059;GO:0007165;GO:0005634;GO:0007093;GO:0003677;GO:0045309;GO:0006588;GO:0019904;GO:0007242;GO:0016350;GO:…	At1g26480.1	68414.m03229 14-3-3 protein GF14 iota (GRF12) identical to 14-3-3 protein GF14iota GI:12963453 from [Arabidopsis thaliana]	8.5e-111	8.5e-111	17.6602	-9.51359	-5.23886	-0.526699	1.11043	4.53432	6.07529	-4.28753	2.94327	4.57916	4.94743	15.1352	17.6602
																					TC19641	weakly similar to UP|Q67VB8_ORYSA (Q67VB8) CREG2-protein-like, partial (73%)	NA	At2g04690.1	68415.m00479 cellular repressor of E1A-stimulated genes (CREG) family contains 1 transmembrane domain; similar to CREG2 (GI:24371079) [Homo sapiens] and (GI:24371081) [Mus musculus]; similar to cellular repr-TRUNCATED-	8.8e-61	8.8e-61	17.6497	-9.86606	-1.11636	-1.64491	0.913101	2.16437	8.3901	-2.00235	1.48127	5.35388	8.53998	12.2357	17.6497
																					DR936264	similar to UP|Q9T0A0_ARATH (Q9T0A0) Acyl-CoA synthetase-like protein (AT4g23850/T32A16_20) (Long chain acyl-CoA synthetase 4) , partial (33%)	NA	At4g23850.1	68417.m03429 long-chain-fatty-acid--CoA ligase / long-chain acyl-CoA synthetase nearly identical to acyl-CoA synthetase (MF7P) from Brassica napus [gi:1617270]	2.3e-101	2.3e-101	17.647	-0.917332	-3.23259	-4.65787	-1.48066	6.32685	6.49235	-7.03553	8.40283	1.88064	5.60085	9.27437	17.647
																					TC13394	weakly similar to PRF|NP_565146.1|18411317|NP_565146 ACT domain containing protein {Arabidopsis thaliana}, partial (34%)	NA	At5g25320.1	68418.m03004 ACT domain-containing protein contains Pfam ACT domain PF01842	1e-52	1e-52	17.6079	-5.6184	0.684282	-0.501609	-4.47665	-0.104726	7.42753	0.124646	4.01798	9.79872	4.60215	4.14954	17.6079
																					DT729151	similar to UP|Q8GZN1_ARATH (Q8GZN1) Pollen-specific calmodulin-binding protein, partial (33%)	NA	At2g43040.1	68415.m05341 calmodulin-binding protein similar to pollen-specific calmodulin-binding protein MPCBP GI:10086260 from [Zea mays]; contains Pfam profile PF00515: TPR Domain	3e-106	3e-106	17.6012	-0.563856	-3.40112	-3.84525	-0.957751	7.41275	5.53991	-7.53959	9.24382	1.23808	4.40129	5.69766	17.6012
																					TC19986	weakly similar to UP|Q6YVD9_ORYSA (Q6YVD9) Peptidase family-like protein, partial (25%)	NA	At1g67420.1	68414.m07674 24 kDa vacuolar protein, putative similar to 24 kDa vacuolar protein VP24 [Ipomoea batatas] gi|5821406|dbj|BAA83809	1.1e-106	1.1e-106	17.5696	-1.28419	-3.67138	-3.08671	-1.57741	6.33578	5.65012	-6.77062	8.42058	1.96519	3.55321	8.5847	17.5696
																					DT765239	similar to PRF|NP_172759.2|30683061|NP_172759 glycosyl transferase family 17 protein {Arabidopsis thaliana}, partial (50%)	NA	At1g12990.1	68414.m01508 glycosyl transferase family 17 protein low similarity to beta-1,4-mannosyl-glycoprotein beta-1,4-N-acetylglucosaminyltransferase (EC 2.4.1.144) from Mus musculus [SP|Q10470], Rattus norvegicus [-TRUNCATED-	1.1e-85	1.1e-85	17.5356	-4.03488	-1.84884	-1.10425	-2.85472	2.72935	7.90095	-2.75042	5.39995	6.46884	4.16657	7.57668	17.5356
																					TC15631	weakly similar to PRF|NP_197474.1|15241163|NP_197474 pectinesterase family protein {Arabidopsis thaliana}, partial (45%)	NA	At5g19730.1	68418.m02346 pectinesterase family protein contains Pfam profile: PF01095 pectinesterase	1.3e-82	1.3e-82	17.5127	-2.28973	-4.34192	-3.63508	-1.02651	6.24643	6.31945	-7.01984	8.57543	2.69689	5.46562	7.85255	17.5127
																					TC18376	similar to UP|O49721_ARATH (O49721) Polygalacturonase-like protein (Fragment), partial (35%)	NA	At4g18180.1	68417.m02701 glycoside hydrolase family 28 protein / polygalacturonase (pectinase) family protein similar to polygalacturonase [Salix gilgiana] GI:6714524; contains PF00295: Glycosyl hydrolases family 28 (po-TRUNCATED-	3.2e-88	3.2e-88	17.5031	-11.2029	-4.80941	-0.643691	2.06781	4.78707	7.05587	-3.7716	2.82679	5.15258	8.88749	14.9876	17.5031
																					TC9284	similar to PRF|NP_564627.1|18404413|NP_564627 F-box family protein / tubby family protein (TULP7) {Arabidopsis thaliana}, partial (77%)	GO:0008081;GO:0003700	At1g53320.1	68414.m06043 F-box family protein / tubby family protein (TULP7) similar to Tubby related protein 2 (Tubby-like protein 2) (P4-6 protein) (Fragment) (SP:P46686) [Mus musculus]; similar to phosphodiesterase (-TRUNCATED-	4.3e-141	4.3e-141	17.4879	-3.34364	-3.516	-2.40681	-1.48579	5.6103	6.39067	-5.79946	7.15905	4.09156	4.21538	11.1726	17.4879
																					DR928171	similar to PRF|NP_563755.1|18390595|NP_563755 expressed protein {Arabidopsis thaliana}, partial (24%)	NA	At1g05960.1	68414.m00625 expressed protein similar to hypothetical protein GB:AAF80120 GI:8810459 from [Arabidopsis thaliana ]	3.5e-89	3.5e-89	17.4802	-2.92653	-1.21979	-3.2284	-1.74079	2.30897	7.44904	-2.69217	5.27907	3.4184	5.038	6.27305	17.4802
																					DR942031	similar to GB|CAC83650.1|18056482|ATH310357 CDC6b protein {Arabidopsis thaliana}, partial (31%)	NA	At1g07270.1	68414.m00773 cell division control protein CDC6b, putative (CDC6b) identical to CDC6b protein (GI:18056482) {Arabidopsis thaliana}; contains Prosite PS00017: ATP/GTP-binding site motif A (P-loop); identical -TRUNCATED-	3.8e-44	3.8e-44	17.3496	-1.57857	-4.04475	-3.752	-0.950248	6.2801	5.10147	-3.4029	7.51327	2.20204	4.8362	7.30877	17.3496
																					TC8849	similar to PRF|NP_194478.3|42567183|NP_194478 glycosyltransferase family 14 protein / core-2/I-branching enzyme family protein {Arabidopsis thaliana}, partial (78%)	GO:0016021;GO:0016757;GO:0008375;GO:0016051;GO:0016020	At4g27480.1	68417.m03948 glycosyltransferase family 14 protein / core-2/I-branching enzyme family protein contains Pfam profile: PF02485 Core-2/I-Branching enzyme	3.2e-159	3.2e-159	17.3489	-4.16824	-3.42414	-1.63889	-1.98111	3.0793	7.13394	-2.74179	4.81228	4.87032	5.28618	7.82153	17.3489
																					TC16740	weakly similar to UP|Q9LV26_ARATH (Q9LV26) Gb|AAC24051.1, partial (14%)	NA	At4g10400.1	68417.m01707 F-box family protein contains F-box domain Pfam:PF00646	2.6e-17	2.6e-17	17.3248	-9.35283	-0.835805	-0.329439	-1.5664	0.898169	11.4873	-0.92083	1.8658	4.11843	8.29177	9.1609	17.3248
																					TC10717	similar to UP|Q8VYU3_LYCES (Q8VYU3) GTP cyclohydrolase I , partial (69%)	GO:0009058;GO:0003934;GO:0008372	At3g07270.1	68416.m00866 GTP cyclohydrolase I identical to GTP cyclohydrolase I GI:19909132 from [Arabidopsis thaliana]; contains Pfam profile: PF01227 GTP cyclohydrolase I	5.1e-134	5.1e-134	17.3235	-3.08029	-2.3898	-1.21748	-3.17604	3.21328	6.35374	-3.57771	6.86821	3.54833	3.76667	5.68724	17.3235
																					TC11269	similar to PRF|NP_566430.2|22331025|NP_566430 RNA recognition motif (RRM)-containing protein {Arabidopsis thaliana}, partial (17%)	NA	At3g12640.1	68416.m01573 RNA recognition motif (RRM)-containing protein contains InterPro entry IPR000504: RNA-binding region RNP-1 (RNA recognition motif) (RRM)	2.1e-43	2.1e-43	17.2579	-1.715	-3.08472	-2.23905	-1.81225	5.78796	5.7514	-5.79475	6.92915	3.00157	3.76677	7.14878	17.2579
																					TC19530	NA	NA	At1g08730.1	68414.m00969 myosin heavy chain (PCR43) identical to myosin heavy chain PCR43 (PIR:T00727) [Arabidopsis thaliana]; similar to ESTs gb|R30087 and gb|AA394762	0.11	0.1	17.2294	-2.46053	-3.6036	-4.16913	-0.857245	5.80003	6.74018	-5.39418	7.08994	2.45227	6.21375	10.6048	17.2294
																					DR954091	similar to UP|Q9C585_ARATH (Q9C585) Ubiquitin-specific protease-like protein, partial (25%)	NA	At5g22030.1	68418.m02563 ubiquitin-specific protease 8, putative (UBP8) similar to ubiquitin-specific protease 8 partial sequence GI:11993469 [Arabidopsis thaliana]	1.7e-98	1.7e-98	17.2156	-3.31119	-2.72843	-2.39327	-1.37431	2.61209	6.44434	-3.02795	6.32116	2.31845	4.63799	7.93711	17.2156
																					TC11904	similar to UP|Q4V3C5_ARATH (Q4V3C5) At4g22860, partial (9%)	NA	At4g22860.1	68417.m03302 expressed protein	4e-49	4e-49	17.185	2.42969	-7.4303	-4.71084	-1.66756	13.5109	3.20756	-11.9489	15.2251	-0.718144	1.78498	8.44299	17.185
																					DR944192	weakly similar to PIR|D85429|D85429 cytochrome P450 like protein [imported] {Arabidopsis thaliana}, partial (37%)	NA	At4g36380.1	68417.m05169 cytochrome P450 90C1 (CYP90C1) / rotundifolia3 (ROT3) identical to Cytochrome P450 90C1 (ROTUNDIFOLIA3) (SP:Q9M066) [Arabidopsis thaliana];	2.8e-68	2.8e-68	17.1738	-2.00348	-3.4218	-2.07767	-2.35678	3.8764	5.27246	-4.48187	7.22452	2.38425	3.42994	5.76748	17.1738
																					TC10025	similar to UP|IBP7_HUMAN (Q16270) Insulin-like growth factor binding protein 7 precursor (IGFBP-7) (IBP-7) (IGF-binding protein 7) (MAC25 protein) (Prostacyclin-stimulating factor) (PGI2-stimulating factor) (IGFBP-rP1), partial (5%)	NA	At4g16500.1	68417.m02497 cysteine protease inhibitor family protein / cystatin family protein similar to SP|Q06445 Cysteine proteinase inhibitor (Cystatin) {Vigna unguiculata}; contains Pfam profile PF00031: Cystatin do-TRUNCATED-	2.5e-06	2.5e-06	17.1713	-3.69549	-2.22664	-0.9621	-3.48939	1.9417	8.38273	-2.22343	5.5298	4.56899	4.66459	7.69275	17.1713
																					TC14205	similar to PRF|NP_187947.1|15231228|NP_187947 multi-copper oxidase type I family protein {Arabidopsis thaliana}, partial (94%)	GO:0031225;GO:0005507;GO:0009846;GO:0009555;GO:0009860;GO:0012505;GO:0030599	At3g13390.1	68416.m01684 multi-copper oxidase type I family protein nearly identical to pollen-specific BP10 protein [SP|Q00624][Brassica napus]; contains Multicopper oxidase domain PF00394	1.4e-227	1.4e-227	17.1669	-11.9575	-6.03236	2.03153	2.87565	3.83969	5.38907	-4.02554	1.22985	6.89292	8.74276	16.697	17.1669
																					TC18900	similar to UP|Q6TEM2_BRARE (Q6TEM2) Inhibitor of growth family, member 3, partial (6%)	NA	At5g23160.1	68418.m02708 expressed protein ; expression supported by MPSS	4.9e-11	4.9e-11	17.1637	-5.2156	-3.7061	-2.35368	-1.80802	4.79852	4.09705	-4.90808	6.69933	5.55443	4.5356	10.2743	17.1637
																					TC18032	weakly similar to UP|Q8W415_TOBAC (Q8W415) CIG1, partial (29%)	NA	At3g30775.1	68416.m03933 proline oxidase, mitochondrial / osmotic stress-responsive proline dehydrogenase (POX) (PRO1) (ERD5) nearly identical to SP|P92983 Proline oxidase, mitochondrial precursor (EC 1.5.3.-) (Osmotic -TRUNCATED-	5.9e-54	5.9e-54	17.146	-4.33861	2.15049	-4.06949	-3.98355	1.0496	15.8468	-0.800336	3.91846	6.31104	5.81122	4.7341	17.146
																					DR951628	NA	NA	At1g72460.1	68414.m08379 leucine-rich repeat transmembrane protein kinase, putative contains Pfam profiles: PF00560 leucine rich repeat (5 copies), PF00069 eukaryotic protein kinase domain	7.5e-48	7.5e-48	17.1445	-4.49459	-2.44141	-1.60262	-0.984342	4.15929	6.01084	-4.27883	4.78551	4.81027	4.78533	9.7393	17.1445
																					TC11208	similar to PRF|NP_181738.1|15227500|NP_181738 DNAJ heat shock N-terminal domain-containing protein {Arabidopsis thaliana}, partial (31%)	NA	At2g42080.1	68415.m05203 DNAJ heat shock N-terminal domain-containing protein low similarity to SP|Q9QYI7 DnaJ homolog subfamily B member 8 (mDJ6) {Mus musculus}; contains Pfam profile PF00226: DnaJ domain	1.6e-59	1.6e-59	17.1164	-2.84491	-0.911202	-2.53694	-3.95136	3.22309	8.75079	-2.9288	6.79853	4.17576	3.834	5.12278	17.1164
																					TC14467	similar to UP|Q8S9G4_9ASPA (Q8S9G4) Acyl-ACP thioesterase, partial (63%)	GO:0006633;GO:0000036	At4g13050.1	68417.m02036 acyl-[acyl carrier protein] thioesterase, putative / acyl-ACP thioesterase, putative / oleoyl-[acyl-carrier protein] hydrolase, putative / S-acyl fatty acid synthase thioesterase, putative stron-TRUNCATED-	1.3e-101	1.3e-101	17.0953	-0.384853	-4.11672	-3.78777	-1.94709	7.49395	3.53085	-6.90274	6.0269	1.50482	3.37316	6.53631	17.0953
																					TC8264	similar to UP|Q5S267_9APIA (Q5S267) Farnesyl diphosphate synthase, complete	GO:0004337;GO:0045337;GO:0004161;GO:0008299	At5g47770.1	68418.m05901 farnesyl pyrophosphate synthetase 1, mitochondrial (FPS1) / FPP synthetase 1 / farnesyl diphosphate synthase 1 identical to SP|Q09152 Farnesyl pyrophosphate synthetase 1, mitochondrial precursor-TRUNCATED-	1.8e-149	1.8e-149	17.0473	0.363574	-4.80549	-5.77968	-2.11055	8.19967	5.7896	-8.52412	13.6704	1.41236	3.48459	9.00546	17.0473
																					TC18655	similar to UP|Q9SMX1_ARATH (Q9SMX1) Mitochondrial RNA helicase (At4g14790), partial (80%)	GO:0016070;GO:0004004;GO:0005739	At4g14790.1	68417.m02274 ATP-dependent RNA helicase, mitochondrial (SUV3) identical to mitochondrial RNA helicase [Arabidopsis thaliana] GI:5823579; contains Pfam profile PF00271: Helicase conserved C-terminal domain -TRUNCATED-	1.6e-180	1.6e-180	17.0379	-8.34866	-2.03068	-1.98106	-0.832686	3.30143	9.06825	-2.98362	4.14669	7.08461	3.71538	8.48557	17.0379
																					TC16633	weakly similar to UP|Q9VMR4_DROME (Q9VMR4) CG11020-PA, isoform A (Mechanosensory transduction channel NOMPC), partial (3%)	NA	At3g04710.1	68416.m00505 ankyrin repeat family protein contains Pfam profile: PF00023 ankyrin repeat	1.7e-59	1.7e-59	17.0334	0.423972	-4.24222	-2.87442	-3.9589	6.12327	5.57062	-5.71777	11.2351	2.15548	1.65205	6.1175	17.0334
																					TC15530	weakly similar to UP|Q6L5M0_BROIN (Q6L5M0) LEA protein, partial (31%)	NA	At1g52680.1	68414.m05948 late embryogenesis abundant protein-related / LEA protein-related low similarity to late embryogenesis abundant proteins from [Brassica napus] SP|P13934, [Cicer arietinum] GI:2909420	1.4e-14	1.4e-14	17.0319	-3.31401	-5.2183	-1.20897	0.391345	5.17474	3.33673	-4.5455	4.94792	1.84806	2.77776	10.6874	17.0319
																					DT734671	similar to PRF|NP_192174.2|30679231|NP_192174 epsin N-terminal homology (ENTH) domain-containing protein / clathrin assembly protein-related {Arabidopsis thaliana}, partial (21%)	NA	At4g02650.1	68417.m00360 epsin N-terminal homology (ENTH) domain-containing protein / clathrin assembly protein-related contains Pfam PF01417: ENTH domain. ENTH (Epsin N-terminal homology) domain; similar to Chain A, Ca-TRUNCATED-	2.8e-73	2.8e-73	17.0233	-10.2999	-3.2882	-0.542597	1.00776	3.22627	6.76538	-3.13354	2.25245	5.51905	8.48328	11.0622	17.0233
																					TC12914	similar to UP|Q6R4Q7_VITRI (Q6R4Q7) Splicing factor-like protein, partial (39%)	GO:0003723	At5g52040.1	68418.m06458 arginine/serine-rich splicing factor RSP41 (RSP41) nearly identical to SP|P92966 Arginine/serine-rich splicing factor RSP41 {Arabidopsis thaliana}	2.9e-69	2.9e-69	17.0016	-4.30368	-3.28568	-3.95031	-0.486725	5.80586	6.8107	-4.71303	5.6265	4.09504	6.78925	10.3754	17.0016
																					DR916994	similar to PRF|NP_198809.1|15242523|NP_198809 expressed protein {Arabidopsis thaliana}, partial (9%)	NA	At3g04680.1	68416.m00501 pre-mRNA cleavage complex family protein similar to Pre-mRNA cleavage complex II protein Clp1 (Swiss-Prot:Q92989) [Homo sapiens]	4.2e-14	4.2e-14	16.9948	-2.74884	-2.78079	-1.53955	-1.9139	3.49125	4.71634	-3.50449	6.37884	4.42495	3.51339	6.22264	16.9948
																					TC17091	similar to UP|Q43650_SOLTU (Q43650) Inorganic phosphate transporter 1, partial (47%)	GO:0016020	At2g38940.1	68415.m04785 phosphate transporter (PT2) identical to phosphate transporter (AtPT2) [Arabidopsis thaliana] GI:1502430	2.2e-112	2.2e-112	16.9804	-8.17389	-5.33693	0.139132	2.14398	3.72901	4.83796	-4.04737	2.10277	5.53471	7.49396	16.2238	16.9804
																					TC19491	similar to UP|Q6TKQ5_VITAE (Q6TKQ5) Protein kinase-like protein, partial (30%)	NA	At5g02800.1	68418.m00222 protein kinase family protein contains protein kinase domain, Pfam:PF00069	5.4e-45	5.4e-45	16.9496	-3.16128	-3.64253	-2.93552	-0.662968	5.49021	5.73304	-5.32532	5.86937	2.60409	3.72668	6.02394	16.9496
																					TC18227	similar to UP|Q8GXJ8_ARATH (Q8GXJ8) GPI-anchored protein, partial (19%)	NA	At5g58050.1	68418.m07265 glycerophosphoryl diester phosphodiesterase family protein contains Pfam PF03009 : Glycerophosphoryl diester phosphodiesterase family; similar to Glycerophosphoryl diester phosphodiesterase prec-TRUNCATED-	5.4e-54	5.4e-54	16.9417	-6.60228	-5.25479	-0.878559	0.993852	4.9609	5.28434	-5.19302	3.81372	4.36722	6.64418	13.5792	16.9417
																					DR923221	similar to PRF|NP_172544.1|15220205|NP_172544 expressed protein {Arabidopsis thaliana}, partial (26%)	NA	At1g10740.1	68414.m01225 expressed protein	1e-57	1e-57	16.9334	-4.25951	-1.88403	-1.60376	-1.37536	1.91951	7.49248	-2.76963	4.12394	3.65342	5.47369	6.2924	16.9334
																					TC9038	similar to PRF|NP_198597.1|15240347|NP_198597 major intrinsic family protein / MIP family protein {Arabidopsis thaliana}, partial (76%)	GO:0006810;GO:0015250;GO:0016020	At5g37810.1	68418.m04553 major intrinsic family protein / MIP family protein similar to pollen-specific membrane integral protein SP:P49173 from [Nicotiana alata]; contains Pfam profile: MIP PF00230	9.6e-87	9.6e-87	16.9243	-11.0479	-4.92117	0.341596	2.05933	3.62708	5.29667	-3.69892	1.64727	5.71501	7.61394	12.5056	16.9243
																					TC18853	similar to UP|Q5MJ55_PEA (Q5MJ55) AT-rich element binding factor 1, partial (44%)	NA	At1g06850.1	68414.m00730 bZIP transcription factor, putative contains Pfam profile: PF00170 bZIP transcription factor	2.5e-71	2.5e-71	16.9084	-2.99229	-3.14319	-3.53411	-2.41819	5.29717	8.50858	-4.10194	9.04679	4.80265	5.34309	5.67155	16.9084
																					TC11728	weakly similar to UP|Q67UI5_ORYSA (Q67UI5) C2 domain-containing protein-like, partial (20%)	GO:0000004;GO:0005554;GO:0008372	At1g77460.1	68414.m09020 C2 domain-containing protein / armadillo/beta-catenin repeat family protein similar to CCLS 65 [Silene latifolia] GI:2570102; contains Pfam profiles PF00514: Armadillo/beta-catenin-like repeat, -TRUNCATED-	9.3e-134	9.3e-134	16.9066	-2.91424	-3.33375	-4.55739	0.85913	7.75493	5.44515	-7.92514	6.36243	1.02252	6.78054	11.5734	16.9066
																					TC13382	similar to UP|GOS11_ARATH (Q9LMP7) Golgi SNARE 11 protein (AtGOS11) (Golgi SNAP receptor complex member 1-1), partial (93%)	GO:0016021;GO:0006891;GO:0000149;GO:0006944	At1g15880.1	68414.m01905 Golgi SNARE 11 protein identical to Golgi SNARE 11 protein (GI:13898893) {Arabidopsis thaliana}; similar to putative cis-Golgi SNARE protein GI:2583133 from [Arabidopsis thaliana];similar toSP|O-TRUNCATED-	1.1e-85	1.1e-85	16.8799	-3.14524	-3.02134	-3.12105	-0.080457	4.90791	5.21656	-4.67751	4.4271	2.79615	5.50348	8.62376	16.8799
																					TC14893	similar to UP|Q6ZKY1_ORYSA (Q6ZKY1) Zinc finger protein family-like, partial (33%)	NA	At4g13100.1	68417.m02041 zinc finger (C3HC4-type RING finger) family protein contains Pfam profile: PF00097 zinc finger, C3HC4 type (RING finger)	4.7e-27	4.7e-27	16.8062	-3.59082	-5.84359	-1.41904	-0.222888	6.98072	2.28083	-7.72212	7.80936	2.85496	4.69911	10.5426	16.8062
																					DR949982	NA	NA	At5g55060.1	68418.m06862 expressed protein	1e-31	1e-31	16.7967	-1.79587	-3.78303	-4.25866	-0.723387	6.11737	4.08226	-6.58528	8.35704	1.80447	4.28986	8.65432	16.7967
																					DT761403	NA	NA	At5g22610.1	68418.m02642 F-box family protein contains F-box domain Pfam:PF00646	1.3e-08	1.3e-08	16.7781	-2.4417	-0.932418	-1.89948	-2.83845	2.07442	7.31114	-2.1316	4.35922	4.93196	4.55054	5.43082	16.7781
																					TC16843	NA	NA	At5g01750.2	68418.m00094 expressed protein contains Pfam profile PF04525: Protein of unknown function (DUF567)	7.4e-57	7.4e-57	16.7418	-10.8118	-3.14923	-0.756194	1.02371	3.56622	6.7573	-2.96991	2.72329	7.05931	9.23252	7.70876	16.7418
																					TC11854	NA	GO:0016740;GO:0006506	At2g34980.1	68415.m04292 phosphatidylinositolglycan synthase family protein similar to SP|Q92535 Phosphatidylinositol-glycan biosynthesis, class C protein (PIG-C) {Homo sapiens}	1.3e-111	1.3e-111	16.6485	-2.58563	-1.68476	-2.81559	-2.52019	3.94003	8.31596	-4.0342	5.1006	3.98423	5.44563	6.93528	16.6485
																					TC18101	similar to PRF|NP_564704.2|42562774|NP_564704 expressed protein {Arabidopsis thaliana}, partial (70%)	GO:0008372	At1g55915.1	68414.m06413 expressed protein similar to Hypothetical 30.6 kDa protein in ACT5-YCK1 intergenic region (Swiss-Prot:P38838) [Saccharomyces cerevisiae]; similar to Yhr134wp (GI:500671) [Saccharomyces cerevisia-TRUNCATED-	7.9e-92	7.9e-92	16.5813	-0.521092	-6.39265	-1.48896	-3.10402	5.56957	3.94345	-6.52017	9.45917	2.69791	1.57336	5.45593	16.5813
																					TC14552	similar to UP|MTDH_MEDSA (O82515) Probable mannitol dehydrogenase (NAD-dependent mannitol dehydrogenase) , complete	GO:0045551;GO:0019592;GO:0009809;GO:0009626;GO:0046029;GO:0008372	At4g39330.1	68417.m05568 mannitol dehydrogenase, putative nearly identical to SP|P42734, probable mannitol dehydrogenase	3e-147	3e-147	16.5551	-2.7404	-3.81344	-1.02969	-2.85629	4.10438	3.65222	-3.54655	5.69321	3.15344	3.63396	6.65201	16.5551
																					DT750695	weakly similar to UP|Q94FN3_LOTJA (Q94FN3) Phosphatidylinositol transfer-like protein II, partial (19%)	NA	At4g36490.1	68417.m05181 SEC14 cytosolic factor, putative / phosphoglyceride transfer protein, putative similar to phosphatidylinositol transfer-like protein IV (GI:14486707) [Lotus japonicus]; contains Pfam PF00650 : C-TRUNCATED-	1.2e-34	1.2e-34	16.5481	-7.06636	-4.42122	-0.831937	0.628192	3.74913	5.71005	-4.44464	3.72882	4.48789	6.2525	11.7424	16.5481
																					TC11028	weakly similar to PRF|NP_195571.2|22329242|NP_195571 glycosyl hydrolase family 35 protein {Arabidopsis thaliana}, partial (28%)	NA	At4g38590.1	68417.m05462 glycosyl hydrolase family 35 protein similar to beta-galactosidase GI:7939621 from [Lycopersicon esculentum]; contains Pfam profile PF01301 : Glycosyl hydrolases family 35	1.8e-144	1.8e-144	16.5253	-14.6399	-6.27809	2.05345	3.96046	2.75418	5.01535	-2.55118	0.0553361	5.70869	8.44802	15.7364	16.5253
																					TC8932	similar to UP|Q84MC1_ARATH (Q84MC1) At4g31290, partial (82%)	GO:0000004;GO:0005554;GO:0008372	At5g26220.1	68418.m03121 ChaC-like family protein contains Pfam profile: PF04752 ChaC-like protein	4.8e-85	4.8e-85	16.5183	-0.228095	-3.01525	-2.21196	-4.41088	4.91954	5.53131	-5.2558	11.1005	4.14791	2.35629	6.10094	16.5183
																					TC17553	similar to PRF|NP_197918.1|15239401|NP_197918 expressed protein {Arabidopsis thaliana}, partial (84%)	GO:0000004;GO:0005554;GO:0008372	At5g25360.1	68418.m03008 expressed protein	3.2e-56	3.2e-56	16.5018	-4.46839	-1.04011	-2.08346	-1.89837	3.25644	6.73505	-2.94433	4.27674	3.80516	3.53403	6.76042	16.5018
																					TC10438	similar to PRF|NP_566554.1|18401175|NP_566554 protein phosphatase 2C-related / PP2C-related {Arabidopsis thaliana}, partial (76%)	GO:0000004;GO:0015071;GO:0008372	At3g16560.1	68416.m02116 protein phosphatase 2C-related / PP2C-related contains protein phosphatase 2C domain	2.8e-146	2.8e-146	16.4506	-0.94511	-3.35971	-3.46844	-3.48568	5.19323	7.87672	-4.17092	11.1113	4.62799	3.24055	6.831	16.4506
																					TC14771	similar to UP|TIG_HELPY (P56420) Trigger factor (TF), partial (5%)	NA	At5g40940.1	68418.m04971 hypothetical protein	2.9	0.94	16.4254	-2.51172	-3.18606	-2.1075	-2.34747	5.05397	6.84603	-3.05426	6.74431	2.55203	3.91044	6.86394	16.4254
																					TC17946	similar to PRF|NP_194831.3|42567289|NP_194831 expressed protein {Arabidopsis thaliana}, partial (90%)	GO:0000004;GO:0005554;GO:0008372	At4g31020.1	68417.m04405 expressed protein	4.1e-134	4.1e-134	16.4057	-5.25215	-1.33206	-2.15905	-3.07284	3.05011	9.57727	-2.94343	6.15328	2.77066	5.33492	5.84498	16.4057
																					TC13519	similar to PRF|NP_186753.2|30678270|NP_186753 glycosyl transferase family 8 protein {Arabidopsis thaliana}, partial (47%)	NA	At5g15470.1	68418.m01811 glycosyl transferase family 8 protein contains Pfam profile: PF01501 glycosyl transferase family 8	9.5e-112	9.5e-112	16.3827	-4.63968	-2.5827	-2.85703	-0.24383	2.18617	3.07829	-3.40359	3.80763	3.23	5.46441	10.0717	16.3827
																					TC12012	similar to PRF|NP_196274.1|15240088|NP_196274 expressed protein {Arabidopsis thaliana}, partial (16%)	NA	At5g06560.1	68418.m00740 expressed protein contains Pfam profile PF04576: Protein of unknown function, DUF593	2.1e-49	2.1e-49	16.3607	-2.30567	-2.57868	-3.13089	-1.85711	4.49079	6.63647	-4.34741	5.33585	3.60547	4.64581	5.3359	16.3607
																					TC10266	weakly similar to PRF|NP_194429.2|22328960|NP_194429 expressed protein {Arabidopsis thaliana}, partial (19%)	NA	At5g54920.1	68418.m06840 expressed protein	3.6e-61	3.6e-61	16.3274	-1.16088	-2.3975	-2.26774	-1.93759	4.75148	3.46535	-3.21635	6.5844	2.83341	3.82172	6.27672	16.3274
																					TC10691	similar to UP|DNJ15_ARATH (Q9ZSY2) Chaperone protein dnaJ 15 (Protein ALTERED RESPONSE TO GRAVITY) (AtARG1) (AtJ15) (AtDjB15), partial (62%)	GO:0006457;GO:0008372	At1g68370.1	68414.m07809 gravity-responsive protein / altered response to gravity protein (ARG1) identical to Altered Response to Gravity [Arabidopsis thaliana] GI:4249662; contains Pfam profile PF00226 DnaJ domain -TRUNCATED-	2.6e-125	2.6e-125	16.3205	-3.58317	-1.83617	-2.01493	-1.53111	3.6741	6.25216	-4.35536	5.55963	3.68251	4.11738	5.85529	16.3205
																					TC13759	similar to PRF|NP_568041.1|18420244|NP_568041 protein kinase family protein {Arabidopsis thaliana}, partial (45%)	NA	At4g38470.1	68417.m05436 protein kinase family protein similar to protein kinase [gi:170047] from Glycine max; contains Pfam protein kinase domain PF00069	7.9e-124	7.9e-124	16.307	-5.1479	-3.42565	-2.65486	-1.09463	4.88566	7.579	-4.98974	3.87753	2.96524	6.15868	11.4638	16.307
																					TC15678	homologue to PRF|NP_566791.2|42565206|NP_566791 expressed protein {Arabidopsis thaliana}, partial (87%)	GO:0000004;GO:0005554;GO:0008372	At3g26370.1	68416.m03289 expressed protein contains Pfam PF03138: Plant protein family. The function of this family of plant proteins is unknown;	1.9e-255	1.9e-255	16.2965	0.830147	-3.59063	-7.21381	-1.68985	7.41267	5.23677	-8.0815	9.26523	0.652134	5.22283	6.70009	16.2965
																					TC17576	weakly similar to UP|Q8S198_ORYSA (Q8S198) Glyoxal oxidase-like, partial (16%)	NA	At5g19580.1	68418.m02331 glyoxal oxidase-related contains similarity to glyoxal oxidase precursor [Phanerochaete chrysosporium] gi|1050302|gb|AAA87594	6.2e-44	6.2e-44	16.2773	-8.9117	-4.59088	-0.128156	1.22507	3.84264	5.31828	-3.7103	2.48915	5.28665	6.78217	12.277	16.2773
																					TC15578	similar to PRF|NP_567969.1|18418491|NP_567969 SH3 domain-containing protein 2 (SH3P2) {Arabidopsis thaliana}, partial (63%)	GO:0030276	At4g34660.1	68417.m04921 SH3 domain-containing protein 2 (SH3P2) nearly identical to SH3 domain-containing protein 2 [Arabidopsis thaliana] GI:16974678; contains Pfam profile PF00018: SH3 domain	2.5e-111	2.5e-111	16.2244	-0.6147	-2.63507	-2.59134	-1.27854	2.73495	4.17851	-7.18712	8.37601	2.07162	3.11359	6.99103	16.2244
																					TC18818	NA	NA	NA	NA	NA	NA	16.1934	-1.66855	-0.847289	-2.42112	-2.85824	2.92887	5.85771	-2.24289	3.12713	2.67425	3.83276	5.03443	16.1934
																					TC17194	similar to UP|Q9LLS5_TOBAC (Q9LLS5) Inorganic phosphate transporter, partial (45%)	GO:0005315;GO:0006817	At2g38940.1	68415.m04785 phosphate transporter (PT2) identical to phosphate transporter (AtPT2) [Arabidopsis thaliana] GI:1502430	1.8e-108	1.8e-108	16.188	-8.71453	-4.73326	0.0688057	1.4493	3.10558	5.33645	-3.79429	2.2115	5.03469	6.91513	11.1698	16.188
																					TC18479	weakly similar to UP|O81215_ORYSA (O81215) Auxin transport protein REH1, partial (51%)	GO:0016021;GO:0016023;GO:0045045;GO:0005554;GO:0016020	At5g15100.1	68418.m01769 auxin efflux carrier family protein contains auxin efflux carrier domain, Pfam:PF03547	1.3e-98	1.3e-98	16.1867	1.3352	-4.41193	-4.89157	-3.38507	8.26997	4.53686	-8.16454	13.6973	1.49943	2.68371	6.05948	16.1867
																					DR943682	similar to PRF|NP_193381.1|15235767|NP_193381 sugar transporter family protein {Arabidopsis thaliana}, partial (30%)	NA	At4g16480.1	68417.m02495 sugar transporter family protein similar to SP|Q96QE2 Proton myo-inositol co-transporter (Hmit) [Homo sapiens]; contains Pfam profile PF00083: major facilitator superfamily protein	6.7e-79	6.7e-79	16.1742	-10.6388	-4.13766	0.0817941	1.43	2.38486	5.90681	-3.43697	1.75184	5.40239	7.92077	13.8658	16.1742
																					TC17333	similar to UP|Q9SY82_ARATH (Q9SY82) F14N23.28, partial (31%)	NA	At5g49830.1	68418.m06171 expressed protein	2.3e-110	2.3e-110	16.1527	-4.52371	-4.65159	-4.4701	2.44338	6.73332	5.79471	-7.67088	4.67581	1.92233	6.39632	8.15828	16.1527
																					TC11239	similar to PIR|T07635|T07635 trehalose-6-phosphate phosphatase homolog T1P17.20 {Arabidopsis thaliana}, partial (84%)	GO:0005992;GO:0004805;GO:0008372	At5g51460.2	68418.m06380 trehalose-6-phosphate phosphatase (TPPA) identical to trehalose-6-phosphate phosphatase (AtTPPA) [Arabidopsis thaliana] GI:2944178	1e-137	1e-137	16.1409	-8.18272	3.17483	-5.25231	-0.921483	1.40999	14.153	-0.686986	2.58613	8.3854	12.0836	7.20649	16.1409
																					DR913243	similar to UP|Q8VYR9_ARATH (Q8VYR9) Potassium/proton antiporter-like protein, partial (33%)	NA	At5g51710.1	68418.m06413 K+ efflux antiporter, putative (KEA5) Monovalent cation:proton antiporter family 2 (CPA2 family) member, PMID:11500563; related to glutathione-regulated potassium-efflux system protein [Escheric-TRUNCATED-	9.2e-82	9.2e-82	16.1398	-3.60771	-2.27759	-2.3146	-0.532868	4.73766	6.82648	-3.53449	5.97496	3.05429	6.05787	9.54921	16.1398
																					DR921863	weakly similar to PRF|NP_567859.1|18417683|NP_567859 SET domain-containing protein {Arabidopsis thaliana}, partial (32%)	NA	At4g30860.1	68417.m04381 SET domain-containing protein low similarity to IL-5 promoter REII-region-binding protein [Homo sapiens] GI:12642795; contains Pfam profile PF00856: SET domain	1e-66	1e-66	16.0969	-2.23335	-2.78712	-3.23307	-1.90185	5.00729	5.7431	-2.46632	6.24983	3.48231	4.47006	6.48471	16.0969
																					DT765686	NA	NA	At5g60370.1	68418.m07570 expressed protein predicted protein, Arabidopsis thaliana	7.6e-58	7.6e-58	16.0842	-0.719252	-2.69643	-5.18703	-1.49483	4.90066	4.73988	-5.20881	8.08315	1.85713	4.39903	3.8657	16.0842
																					TC17329	similar to UP|Q9FDV6_FAGSY (Q9FDV6) Protein kinase, partial (41%)	GO:0016301;GO:0003700;GO:0008372	At3g18750.1	68416.m02380 protein kinase family protein contains protein kinase domain, Pfam:PF00069	3e-131	3e-131	16.0802	0.202955	-1.88919	-5.76422	-2.22116	5.01792	7.06538	-2.08752	9.6977	1.81462	3.7015	5.28743	16.0802
																					TC15622	similar to UP|Q9M1T1_ARATH (Q9M1T1) Sugar-phosphate isomerase-like protein, partial (91%)	GO:0005554	At3g54690.1	68416.m06051 sugar isomerase (SIS) domain-containing protein / CBS domain-containing protein similar to SP|Q47334 Polysialic acid capsule expression protein kpsF {Escherichia coli}; contains Pfam profiles PF-TRUNCATED-	4.1e-134	4.1e-134	16.0536	-2.949	-2.59302	-3.66231	-2.66217	4.86355	8.66115	-5.56389	6.155	3.85408	5.42315	7.26909	16.0536
																					TC19432	similar to PRF|NP_567588.1|18415316|NP_567588 nodulin-related {Arabidopsis thaliana}, partial (25%)	NA	At5g45275.1	68418.m05557 expressed protein Requires functional assignment.	1.5e-81	1.5e-81	16.0104	-3.86434	-1.35582	-0.713614	-3.83516	1.52064	4.39847	-1.17445	5.17219	6.94481	4.09816	3.1784	16.0104
																					DT730438	similar to PRF|NP_568298.1|18417344|NP_568298 expressed protein {Arabidopsis thaliana}, partial (33%)	NA	At3g27320.1	68416.m03414 expressed protein low similarity to PrMC3 [Pinus radiata] GI:5487873	3.1e-65	3.1e-65	16.0041	-0.818842	-2.86102	-3.97922	-1.79647	4.76126	3.79661	-5.53938	7.3414	2.03487	3.61135	6.76968	16.0041
																					TC13324	homologue to PRF|NP_567859.1|18417683|NP_567859 SET domain-containing protein {Arabidopsis thaliana}, partial (4%)	NA	At4g30860.1	68417.m04381 SET domain-containing protein low similarity to IL-5 promoter REII-region-binding protein [Homo sapiens] GI:12642795; contains Pfam profile PF00856: SET domain	3.4e-52	3.4e-52	15.996	-1.86997	-2.53239	-3.35421	-2.25051	5.09259	5.42893	-2.56436	5.90519	3.646	3.01846	7.19064	15.996
																					TC11060	weakly similar to PRF|NP_194934.1|15236653|NP_194934 calcium-binding EF hand family protein {Arabidopsis thaliana}, partial (31%)	NA	At4g32060.1	68417.m04563 calcium-binding EF hand family protein contains INTERPRO:IPR002048 calcium-binding EF-hand domain	9.4e-57	9.4e-57	15.9625	-0.121487	-7.37198	-2.31044	-0.874815	7.80563	1.28746	-8.56735	8.90814	0.786104	2.14925	7.65818	15.9625
																					TC14527	similar to UP|Q9FYE5_ARATH (Q9FYE5) Phosphate/phosphoenolpyruvate translocator-like protein, partial (95%)	GO:0008514	At3g10290.1	68416.m01233 phosphate translocator-related low similarity to SP|P52178 Triose phosphate/phosphate translocator, non-green plastid, chloroplast precursor (CTPT) {Brassica oleracea}, phosphoenolpyruvate/phosp-TRUNCATED-	3.3e-132	3.3e-132	15.9323	-1.39281	-3.41994	-7.47905	-0.845109	8.03159	7.83648	-5.06086	10.2478	0.806589	6.82335	8.65774	15.9323
																					DT731506	weakly similar to UP|Q9FFG4_ARATH (Q9FFG4) Arabidopsis thaliana genomic DNA chromosome 5 P1 clone:MOP10 (At5g05510), partial (10%)	NA	At5g05510.1	68418.m00598 protein kinase-related low similarity to SP|O60566 Mitotic checkpoint serine/threonine-protein kinase BUB1 beta (EC 2.7.1.-) {Homo sapiens}	3e-35	3e-35	15.9322	0.347629	-3.79834	-4.47049	-1.67971	6.93315	4.82362	-7.68402	8.73284	1.04584	3.29605	7.39084	15.9322
																					TC16369	similar to UP|RER1A_ARATH (O48670) RER1A protein (AtRER1A), partial (83%)	GO:0006890;GO:0016021;GO:0030173;GO:0000004;GO:0005795;GO:0005554	At4g39220.1	68417.m05552 RER1A protein identical to SP|O48670 RER1A protein (AtRER1A) {Arabidopsis thaliana}	5e-67	5e-67	15.9202	-2.56854	-3.49366	-2.92119	-1.34844	4.97322	5.95596	-5.42455	6.94388	3.45368	4.86754	9.06826	15.9202
																					TC10073	weakly similar to UP|Q9SMG7_HORVU (Q9SMG7) Nicotianamine aminotransferase A, partial (80%)	GO:0009058;GO:0008483;GO:0008372	At5g36160.1	68418.m04357 aminotransferase-related similar to nicotianamine aminotransferase B GI:6469087 from [Hordeum vulgare subsp. vulgare]	2.6e-141	2.6e-141	15.8944	-3.02857	-7.49175	0.479004	-1.88978	4.6099	4.41024	-3.80575	6.46653	4.55585	2.61141	8.00528	15.8944
																					TC11485	weakly similar to UP|Q5N7N1_ORYSA (Q5N7N1) MATE efflux protein-like, partial (86%)	GO:0000004;GO:0015297;GO:0005554;GO:0008372;GO:0005215;GO:0016020	At1g71140.1	68414.m08209 MATE efflux family protein similar to ripening regulated protein DDTFR18 [Lycopersicon esculentum] GI:12231296; contains Pfam profile PF01554: Uncharacterized membrane protein family	8.6e-145	8.6e-145	15.8936	1.82924	-5.9274	-3.75505	-3.2672	3.4103	5.83977	-8.86925	10.5555	1.77542	2.56362	6.97694	15.8936
																					TC11399	similar to PRF|NP_566169.1|18396135|NP_566169 zinc finger (C3HC4-type RING finger) family protein {Arabidopsis thaliana}, partial (55%)	GO:0005515;GO:0008270	At3g02290.1	68416.m00210 zinc finger (C3HC4-type RING finger) family protein contains zinc finger motif, C3HC4 type (RING finger)	2.9e-62	2.9e-62	15.8838	-5.89827	-2.43421	-1.00635	-0.177497	2.19355	6.03524	-2.50956	2.92227	4.18677	6.61079	9.17466	15.8838
																					TC9933	weakly similar to PRF|NP_565893.1|18404824|NP_565893 glycosyl transferase family 8 protein {Arabidopsis thaliana}, partial (31%)	NA	At2g38650.1	68415.m04747 glycosyl transferase family 8 protein contains Pfam profile: PF01501 glycosyl transferase family 8	1e-89	1e-89	15.8579	-1.84053	-3.25431	-8.15959	-0.692879	10.2128	7.77437	-8.73724	9.54279	2.2223	7.95825	11.231	15.8579
																					DR950553	similar to UP|Q6TFY5_ERWAM (Q6TFY5) ORF11, partial (9%)	NA	At3g06240.1	68416.m00717 F-box family protein contains F-box domain Pfam:PF00646	4.1e-13	4.1e-13	15.8453	-2.77257	-2.26027	-1.62321	-1.39044	3.144	5.78041	-3.93612	4.97379	4.60685	5.20062	6.34862	15.8453
																					TC8131	similar to PRF|NP_567543.1|18414983|NP_567543 human Rev interacting-like family protein / hRIP family protein {Arabidopsis thaliana}, partial (73%)	GO:0003677;GO:0005634	At4g17890.1	68417.m02666 human Rev interacting-like family protein / hRIP family protein contains InterPro accession IPR001164: Human Rev interacting-like protein (hRIP)	1.1e-140	1.1e-140	15.8392	-4.78206	-1.84247	-3.72678	-0.738895	5.94864	5.48462	-5.30421	5.36433	2.83461	5.48338	5.0209	15.8392
																					DR924493	similar to PRF|NP_193880.2|42567013|NP_193880 pyridine nucleotide-disulphide oxidoreductase family protein {Arabidopsis thaliana}, partial (13%)	NA	At4g21490.1	68417.m03107 pyridine nucleotide-disulphide oxidoreductase family protein similar to GI:3718005 alternative NADH-dehydrogenase {Yarrowia lipolytica}; contains Pfam profile PF00070: Pyridine nucleotide-disulp-TRUNCATED-	7.3e-34	7.3e-34	15.8079	-3.40981	-0.876832	-1.4587	-2.01114	2.00668	7.12918	-1.8891	3.94009	4.36207	3.8854	4.06921	15.8079
																					DT768281	NA	NA	At1g64760.1	68414.m07343 glycosyl hydrolase family 17 protein similar to elicitor inducible chitinase Nt-SubE76 GI:11071974 from [Nicotiana tabacum]	3.8e-23	3.8e-23	15.7714	-5.2688	-3.18324	-0.696197	0.0903875	2.86821	4.77846	-2.75292	2.84397	3.68022	4.77317	9.35322	15.7714
																					TC13694	NA	NA	At3g11920.1	68416.m01461 glutaredoxin-related contains INTERPRO Domain IPR002109, Glutaredoxin (thioltransferase)	8e-83	8e-83	15.7702	-6.09789	-1.75985	-0.023017	0.107623	1.19685	4.44386	-1.42261	1.17235	7.24537	6.12184	7.33115	15.7702
																					TC13625	similar to UP|Q5J884_LOTJA (Q5J884) KUP-related potassium transporter, partial (30%)	NA	At2g30070.1	68415.m03658 potassium transporter (KUP1) identical to potassium transporter [Arabidopsis thaliana] gi|2654088|gb|AAB87687; KUP/HAK/KT Transporter family member, PMID:11500563	4.4e-57	4.4e-57	15.768	-3.67546	-2.01374	-1.02251	-1.0707	1.70307	2.83144	-3.29981	3.5134	2.27655	3.00276	7.11661	15.768
																					TC18964	similar to PRF|NP_173277.2|22329655|NP_173277 kinesin motor protein-related {Arabidopsis thaliana}, partial (42%)	NA	At1g63640.1	68414.m07197 kinesin motor protein-related C-terminal region is similar to C-term region of kinesin motor protein GB:AAB51397 (Mus musculus); contains Pfam profile: PF00225 Kinesin motor domain	1.8e-190	1.8e-190	15.7259	1.66144	-7.14893	-6.74366	-2.48937	10.1117	5.70346	-13.2823	15.7066	0.769457	1.28324	6.53879	15.7259
																					DR930734	weakly similar to PRF|NP_565893.1|18404824|NP_565893 glycosyl transferase family 8 protein {Arabidopsis thaliana}, partial (12%)	NA	At2g38650.1	68415.m04747 glycosyl transferase family 8 protein contains Pfam profile: PF01501 glycosyl transferase family 8	3.4e-25	3.4e-25	15.7171	-1.85173	-2.03267	-3.06267	-1.48669	4.99519	6.76032	-3.50543	5.3623	2.59869	3.74428	6.50781	15.7171
																					TC17788	similar to UP|Q6T284_9ROSI (Q6T284) Predicted protein, partial (13%)	NA	At2g05160.1	68415.m00543 zinc finger (CCCH-type) family protein / RNA recognition motif (RRM)-containing protein contains InterPro entry IPR000504: RNA-binding region RNP-1 (RNA recognition motif) (RRM)	2.2e-55	2.2e-55	15.6953	-7.66244	-3.55654	1.17542	-1.96409	1.63266	6.14227	-1.30243	2.35467	7.76416	4.6532	8.73459	15.6953
																					DT726927	homologue to PRF|NP_178588.1|15224480|NP_178588 zinc finger (CCCH-type) family protein / RNA recognition motif (RRM)-containing protein {Arabidopsis thaliana}, partial (14%)	NA	At2g05160.1	68415.m00543 zinc finger (CCCH-type) family protein / RNA recognition motif (RRM)-containing protein contains InterPro entry IPR000504: RNA-binding region RNP-1 (RNA recognition motif) (RRM)	2e-45	2e-45	15.6759	-5.55431	-3.03358	0.463172	-2.2382	1.76052	5.11667	-2.12572	2.31744	6.05527	3.62331	6.8476	15.6759
																					TC13464	similar to UP|Q9LTY6_ARATH (Q9LTY6) Uridine kinase-like protein, partial (46%)	GO:0005524;GO:0004845;GO:0009058;GO:0016301;GO:0008372	At3g27440.1	68416.m03430 uracil phosphoribosyltransferase, putative / UMP pyrophosphorylase, putative / UPRTase, putative similar to SP|O65583 Uracil phosphoribosyltransferase (EC 2.4.2.9) (UMP pyrophosphorylase) (UPRTa-TRUNCATED-	4.6e-87	4.6e-87	15.5771	-5.50804	-2.80484	-1.89062	0.480798	3.40309	5.3312	-3.31305	2.41828	3.48176	5.89541	9.57313	15.5771
																					DR935925	similar to PRF|NP_180618.2|30684653|NP_180618 BTB/POZ domain-containing protein {Arabidopsis thaliana}, partial (17%)	NA	At2g30600.1	68415.m03728 BTB/POZ domain-containing protein contains Pfam PF00651: BTB/POZ domain; contains Interpro IPR000210/ PS50097: BTBB/POZ domain; similar to MigA (GI:1841872) [Dictyostelium discoideum]	2e-63	2e-63	15.5492	-5.10233	-3.13779	0.177312	-0.809791	2.48329	5.08872	-2.43817	2.5231	4.65153	2.62443	3.98503	15.5492
																					DT749587	similar to UP|Q6NLQ8_ARATH (Q6NLQ8) At5g57740, partial (28%)	NA	At5g57740.1	68418.m07218 zinc finger (C3HC4-type RING finger) family protein / ankyrin repeat family protein contains Pfam profile: PF00097 zinc finger, C3HC4 type (RING finger) and Pfam profile: PF00023 ankyrin repeat -TRUNCATED-	9e-68	9e-68	15.5292	-2.62748	-2.62391	-1.9074	-0.315056	3.63314	6.20922	-3.08855	4.13575	4.276	5.45172	7.2201	15.5292
																					DT736498	similar to PRF|NP_190126.1|15230692|NP_190126 exostosin family protein {Arabidopsis thaliana}, partial (35%)	NA	At3g45400.1	68416.m04901 exostosin family protein contains Pfam profile: PF03016 Exostosin family	2e-70	2e-70	15.5273	-0.534207	-4.95331	-2.32887	-1.09983	5.92169	3.98881	-8.45937	10.0421	1.12795	3.36142	7.8851	15.5273
																					DT759852	similar to PRF|NP_190745.1|15231033|NP_190745 tetratricopeptide repeat (TPR)-containing protein {Arabidopsis thaliana}, partial (10%)	NA	At3g51770.1	68416.m05677 tetratricopeptide repeat (TPR)-containing protein contains Pfam profile PF00515: TPR Domain	5.6e-38	5.6e-38	15.4481	-3.91603	-0.866407	-1.94793	-1.63788	2.19512	8.81569	-2.36367	1.97377	4.57066	6.04917	6.85815	15.4481
																					DR944256	similar to PIR|T48135|T48135 nucleotide sugar epimerase-like protein {Arabidopsis thaliana}, partial (4%)	NA	At4g00110.1	68417.m00011 NAD-dependent epimerase/dehydratase family protein similar to nucleotide sugar epimerase from Vibrio vulnificus GI:3093975 [PID:g3093975], WbnF [Escherichia coli] GI:5739472, CAPI protein {Staph-TRUNCATED-	5e-16	5e-16	15.3692	-0.998686	-3.16385	-4.74231	-0.907375	6.65798	5.49706	-6.85095	8.37346	1.61038	4.47998	7.62182	15.3692
																					TC17134	similar to PRF|NP_180627.1|15224552|NP_180627 expressed protein {Arabidopsis thaliana}, partial (15%)	NA	At1g70750.1	68414.m08155 expressed protein contains Pfam profile PF04576: Protein of unknown function, DUF593; supporting cDNA gi|4101563|gb|AF004556.1|AF004556	7.5e-48	7.5e-48	15.3548	-7.11759	-1.47034	-0.497878	-0.85946	1.34766	6.2315	-1.44364	2.15634	7.63927	6.99222	8.27698	15.3548
																					TC10820	similar to UP|Q8W106_ARATH (Q8W106) AT3g27930/K24A2_2, partial (70%)	GO:0005554;GO:0008372	At3g27930.1	68416.m03486 expressed protein	1e-152	1e-152	15.3545	0.722968	-5.24909	-4.82292	-2.10651	9.98249	4.15481	-8.72464	10.9102	0.806846	2.86124	8.24953	15.3545
																					TC18390	weakly similar to UP|Q6NLB1_ARATH (Q6NLB1) At2g26850, partial (39%)	NA	At2g26850.1	68415.m03221 F-box family protein contains Pfam PF00646: F-box domain; similar to SKP1 interacting partner 2 (SKIP2) TIGR_Ath1:At5g67250	8.5e-55	8.5e-55	15.3541	-2.09389	-6.38101	-2.84484	0.23437	6.57402	3.63135	-7.08906	7.72607	1.60406	4.5171	9.45886	15.3541
																					TC15381	similar to UP|Q93ZP5_ARATH (Q93ZP5) AT5g40720/MNF13_240, partial (55%)	GO:0005554	At5g40720.1	68418.m04942 expressed protein contains Pfam profile PF01697: Domain of unknown function	1.3e-153	1.3e-153	15.3264	-1.71776	-6.73171	-1.44165	-1.39296	3.2753	4.53262	-7.68238	8.86743	2.63807	2.53911	7.64001	15.3264
																					TC16517	similar to UP|KADC1_ARATH (Q9ZUU1) Probable adenylate kinase 1, chloroplast precursor (ATP-AMP transphosphorylase) , partial (81%)	GO:0009507;GO:0048364;GO:0008151;GO:0008652;GO:0005737;GO:0005634;GO:0019201;GO:0048367;GO:0009570	At2g37250.1	68415.m04570 adenylate kinase family protein contains Pfam profile: PF00406 adenylate kinase	9.5e-96	9.5e-96	15.2613	-5.94845	-0.445409	-1.16168	-3.14485	1.57034	10.384	-0.911939	1.81369	5.63136	6.05081	6.27559	15.2613
																					TC13306	weakly similar to UP|Q5R216_TOBAC (Q5R216) Myosin XI, partial (10%)	NA	At1g54560.1	68414.m06222 myosin, putative similar to myosin GI:433663 from [Arabidopsis thaliana]	1.2e-54	1.2e-54	15.243	-1.98032	-4.60323	-4.07925	-0.474324	7.50323	5.61264	-7.80737	6.8343	1.48824	5.07761	11.8543	15.243
																					TC10280	similar to UP|Q852S9_MALDO (Q852S9) S-adenosylmethionine decarboxylase, partial (90%)	GO:0004014;GO:0008372	At3g25570.1	68416.m03180 adenosylmethionine decarboxylase family protein contains Pfam profile: PF01536 adenosylmethionine decarboxylase	3.5e-114	3.5e-114	15.196	-9.6729	0.736111	-1.46971	-2.67792	0.400222	12.2913	-0.497499	3.02345	9.58098	7.0184	7.30359	15.196
																					TC14204	similar to UP|Q39322_BRANA (Q39322) Bplo protein, partial (51%)	GO:0005507;GO:0009846;GO:0009555;GO:0009860	At1g55570.1	68414.m06360 multi-copper oxidase type I family protein nearly identical to pollen-specific BP10 protein [SP|Q00624][Brassica napus]; contains Multicopper oxidase domain PF00394	5.5e-123	5.5e-123	15.1909	-11.4552	-5.44038	1.28524	2.05088	3.10791	4.88057	-2.88769	1.30242	5.86091	6.18681	12.2351	15.1909
																					TC12676	similar to PRF|NP_173224.2|30685543|NP_173224 expressed protein {Arabidopsis thaliana}, partial (26%)	NA	At1g17820.1	68414.m02206 expressed protein	5.5e-116	5.5e-116	15.1488	-4.85343	-1.07934	0.0417831	-1.88326	1.19402	7.3424	-1.63889	3.01763	4.73432	5.54443	5.79442	15.1488
																					TC15168	homologue to UP|Q9XGC2_VITVI (Q9XGC2) SINA1p, partial (86%)	GO:0006511;GO:0007275;GO:0005634;GO:0005739;GO:0005554	At3g61790.1	68416.m06933 seven in absentia (SINA) family protein similar to siah-1A protein [Mus musculus] GI:297035; contains Pfam profile PF03145: Seven in absentia protein family	1.1e-147	1.1e-147	15.1256	-3.2053	-1.72285	-1.32962	-0.610032	5.20265	3.71973	-6.21533	6.65415	2.92744	4.15578	6.76385	15.1256
																					TC16990	similar to PRF|NP_196862.1|15240660|NP_196862 ABC transporter family protein {Arabidopsis thaliana}, partial (57%)	GO:0042626;GO:0004009	At3g53510.1	68416.m05908 ABC transporter family protein breast cancer resistance protein (BCRP), Homo sapiens, EMBL:AF098951	2.1e-185	2.1e-185	15.1123	-4.10765	-3.43099	-0.938649	-0.137487	2.92258	2.87401	-3.88411	4.18508	5.11459	5.22652	9.69156	15.1123
																					DT730317	homologue to UP|Q4G2Z0_TOBAC (Q4G2Z0) Pectin methylesterase, partial (2%)	NA	At3g62170.1	68416.m06985 pectinesterase family protein contains Pfam profiles: PF01095 pectinesterase, PF04043 plant invertase/pectin methylesterase inhibitor ;similar to pollen-specific pectin esterase GI:1620652 from-TRUNCATED-	5e-36	5e-36	15.1001	-9.39407	-4.18022	0.507007	2.10797	3.31545	4.58687	-3.25571	1.40796	4.86305	7.01762	13.5843	15.1001
																					TC15757	homologue to UP|ACT_GOSHI (O81221) Actin, complete	GO:0030479;GO:0003774;GO:0045214;GO:0000166;GO:0007291;GO:0030016;GO:0015629;GO:0005739;GO:0005829;GO:0005200;GO:0030036;GO:0035267;GO:0005856;GO:0007010;GO:0006936;GO:0005884;GO:0000915;GO:0000004;GO:0008016;GO:0005515;GO:0043034;GO:0030480;GO:0005524;GO:0030467;GO:0005625;GO:0008307;GO:0000146;GO:0005198	At2g37620.1	68415.m04615 actin 1 (ACT1) identical to SP|P10671 Actin 1 (Actin 3) {Arabidopsis thaliana}	5.2e-198	5.2e-198	15.0937	-1.1543	-3.88376	-2.99894	-0.555638	5.74825	4.82466	-7.62012	7.35241	1.93634	5.32762	7.50558	15.0937
																					TC15843	homologue to UP|Q8LLD7_9MAGN (Q8LLD7) Sphingolipid long chain base delta 8 desaturase, partial (48%)	NA	At2g46210.1	68415.m05746 delta-8 sphingolipid desaturase, putative similar to delta-8 sphingolipid desaturase GI:3819708 from [Brassica napus]	6.3e-67	6.3e-67	15.0876	-5.0865	1.12206	-3.12082	-3.34909	1.58345	10.8222	-1.82191	4.77723	5.65113	6.78738	4.29882	15.0876
																					TC15579	similar to PRF|NP_567969.1|18418491|NP_567969 SH3 domain-containing protein 2 (SH3P2) {Arabidopsis thaliana}, partial (95%)	GO:0030276	At4g34660.1	68417.m04921 SH3 domain-containing protein 2 (SH3P2) nearly identical to SH3 domain-containing protein 2 [Arabidopsis thaliana] GI:16974678; contains Pfam profile PF00018: SH3 domain	1.9e-145	1.9e-145	15.0872	-2.52319	-3.95097	-2.6931	-1.75723	6.09558	4.90205	-4.69417	9.07203	3.19462	4.94342	6.99247	15.0872
																					TC12355	similar to UP|Q8GTC5_ORYSA (Q8GTC5) Importin beta-like protein (Fragment), partial (18%)	NA	At5g53480.1	68418.m06646 importin beta-2, putative similar to importin-beta2 [Oryza sativa (japonica cultivar-group)] GI:3983665; contains Pfam profile PF03810: Importin-beta N-terminal domain	3.3e-40	3.3e-40	15.0766	-2.46896	-2.80034	-0.589681	-4.02061	2.20191	4.27834	-2.70814	6.86232	5.44586	2.49611	4.35327	15.0766
																					TC9922	similar to PRF|NP_850540.1|30680549|NP_850540 zinc finger (CCCH-type/C3HC4-type RING finger) family protein {Arabidopsis thaliana}, partial (83%)	GO:0003676;GO:0008270	At3g08505.1	68416.m00986 zinc finger (CCCH-type/C3HC4-type RING finger) family protein contains zinc finger C-x8-C-x5-C-x3-H type (and similar) domains, Pfam:PF00642 and zinc finger, C3HC4 type (RING finger) domain, Pfa-TRUNCATED-	5.6e-98	5.6e-98	15.0455	-9.98352	-0.438742	-1.00769	-0.802658	1.07863	8.79691	-1.07638	1.79882	6.12265	5.39897	6.20482	15.0455
																					TC12619	similar to UP|P93389_TOBAC (P93389) Phosphate/phosphoenolpyruvate translocator, partial (60%)	GO:0009670;GO:0015717;GO:0015297	At5g33320.1	68418.m03955 triose phosphate/phosphate translocator, putative similar to SWISS-PROT:P52178 triose phosphate/phosphate translocator [Cauliflower] {Brassica oleracea}	1.4e-87	1.4e-87	15.0413	-0.492098	-1.60095	-2.65141	-3.43226	3.76231	2.50523	-3.96283	7.83344	1.71181	2.11951	3.46639	15.0413
																					TC8339	similar to UP|Q84X92_HORVD (Q84X92) Phosphoethanolamine cytidylyltransferase, partial (59%)	GO:0009058;GO:0004306	At2g38670.1	68415.m04749 ethanolamine-phosphate cytidylyltransferase, putative / phosphorylethanolamine transferase, putative / CTP:phosphoethanolamine cytidylyltransferase, putative similar to SP|Q99447 Ethanolamine-ph-TRUNCATED-	3.7e-142	3.7e-142	15.0336	-5.34644	-1.22557	-1.91448	-2.15233	1.19555	7.123	-1.66784	5.43091	6.61814	4.68258	7.62002	15.0336
																					TC13040	similar to GB|AAQ01194.1|33243048|AY336988 disease related protein 1 {Oryza sativa (japonica cultivar-group)}, partial (4%)	NA	At1g50180.1	68414.m05627 disease resistance protein (CC-NBS-LRR class), putative domain signature CC-NBS-LRR exists, suggestive of a disease resistance protein.	5.2e-72	5.2e-72	15.0321	-6.90691	-2.44392	-0.0777787	-2.25555	2.08387	6.94322	-2.08399	4.63948	7.68655	4.44403	6.77995	15.0321
																					TC14428	similar to UP|Q852R1_LOTJA (Q852R1) Serine palmitoyltransferase, partial (98%)	GO:0030148;GO:0004758;GO:0008372	At5g23670.1	68418.m02775 serine C-palmitoyltransferase (LCB2) identical to serine palmitoyltransferase [Arabidopsis thaliana] GI:9309380; similar to serine palmitoyltransferase from Solanum tuberosum [GI:4995890], Homo -TRUNCATED-	4.5e-224	4.5e-224	15.0007	-3.98738	-4.2437	-2.86988	-1.44068	5.70806	8.02277	-4.52509	6.0855	5.33091	4.70466	9.09613	15.0007
																					DT760507	similar to PRF|NP_564360.1|18397616|NP_564360 SEC14 cytosolic factor family protein / phosphoglyceride transfer family protein {Arabidopsis thaliana}, partial (9%)	NA	At1g30690.1	68414.m03752 SEC14 cytosolic factor family protein / phosphoglyceride transfer family protein contains Pfam PF00650 : CRAL/TRIO domain; contains Pfam PF03765 : CRAL/TRIO, N-terminus; similar to cytosolic fac-TRUNCATED-	3.9e-20	3.9e-20	14.999	-0.668709	-4.13726	-3.59622	-1.90924	5.88682	5.28704	-6.43866	9.4013	2.08456	3.44869	6.49761	14.999
																					DR929586	homologue to UP|Q41654_VICFA (Q41654) Guanine nucleotide regulatory protein, partial (74%)	NA	At5g47520.1	68418.m05867 Ras-related GTP-binding protein, putative similar to GTP-binding protein RAB11J GI:1370160 from [Lotus japonicus]	7.3e-76	7.3e-76	14.9768	-1.50307	-3.95145	-1.991	-0.638156	4.53707	5.31131	-4.9776	5.70563	2.64871	1.86072	8.29471	14.9768
																					TC19067	similar to UP|YB1E_SCHPO (P87179) Serine-rich protein C30B4.01c precursor, partial (5%)	NA	At3g23350.1	68416.m02945 expressed protein ; expression supported by MPSS	2.7e-11	2.7e-11	14.9454	-3.43017	-2.66976	-1.35777	-1.39793	3.31044	5.15939	-3.21276	4.07053	4.41351	4.17535	6.2602	14.9454
																					DR939023	similar to UP|Q9LNN0_ARATH (Q9LNN0) F8L10.9 protein, partial (34%)	NA	At1g53050.1	68414.m06007 protein kinase family protein contains Pfam domain, PF00069: Protein kinase domain	5.2e-98	5.2e-98	14.9226	-0.686859	-3.50184	-4.17714	-2.28034	6.04439	5.62804	-6.90773	11.4002	2.22625	4.06857	3.93227	14.9226
																					TC16855	similar to UP|Q5MJ55_PEA (Q5MJ55) AT-rich element binding factor 1, partial (49%)	GO:0003677;GO:0006355;GO:0003700	At1g06850.1	68414.m00730 bZIP transcription factor, putative contains Pfam profile: PF00170 bZIP transcription factor	7.3e-73	7.3e-73	14.9091	-0.590937	-1.68719	-5.77378	-1.48904	6.67329	6.36705	-6.37298	7.86077	1.69365	5.86907	7.55513	14.9091
																					TC11206	similar to UP|Q6NLQ6_ARATH (Q6NLQ6) At3g57530, partial (58%)	GO:0016301;GO:0004685;GO:0006468;GO:0008372	At3g57530.1	68416.m06406 calcium-dependent protein kinase, putative / CDPK, putative similar to calmodulin-domain protein kinase CDPK isoform 7 [Arabidopsis thaliana] gi|1399277|gb|AAB03247	1.5e-145	1.5e-145	14.9036	-3.95419	-1.69805	-0.766985	-2.45161	1.8177	6.58481	-1.76717	4.10859	4.72651	3.22775	5.96502	14.9036
																					TC12035	similar to PRF|NP_850386.1|30689266|NP_850386 epsin N-terminal homology (ENTH) domain-containing protein {Arabidopsis thaliana}, partial (23%)	NA	At2g43160.1	68415.m05359 epsin N-terminal homology (ENTH) domain-containing protein contains Pfam PF01417: ENTH domain. ENTH (Epsin N-terminal homology) domain; similar to Af10-protein (GI:1724114) [Avena fatua] -TRUNCATED-	1.1e-101	1.1e-101	14.871	-3.76537	-3.1871	-2.94152	-0.383685	5.0096	5.69732	-4.71742	5.60985	3.07264	5.31359	8.4549	14.871
																					TC8077	similar to PRF|NP_564513.1|18401869|NP_564513 expressed protein {Arabidopsis thaliana}, partial (83%)	GO:0000004;GO:0005554;GO:0008372	At1g47740.1	68414.m05308 expressed protein	4.3e-100	4.3e-100	14.8197	1.788	-3.47647	-5.90457	-4.32422	7.7868	6.7298	-7.3613	8.35028	1.71743	2.69999	5.78224	14.8197
																					DR938104	similar to UP|ALA1_ARATH (P98204) Phospholipid-transporting ATPase 1 (Aminophospholipid flippase 1) , partial (17%)	NA	At5g04930.1	68418.m00521 phospholipid-transporting ATPase 1 / aminophospholipid flippase 1 / magnesium-ATPase 1 (ALA1) nearly identical to SP|P98204 Phospholipid-transporting ATPase 1 (EC 3.6.3.1) (Aminophospholipid fli-TRUNCATED-	1.1e-89	1.1e-89	14.793	-0.339557	-1.96577	-2.74239	-1.95668	6.65177	5.06094	-6.5719	8.40052	1.93318	3.79306	6.94352	14.793
																					DR915564	weakly similar to PRF|NP_564070.1|18394685|NP_564070 DNA cross-link repair protein-related {Arabidopsis thaliana}, partial (42%)	NA	At1g19025.1	68414.m02368 DNA cross-link repair protein-related contains weak similarity to Swiss-Prot:P30620 DNA cross-LINK repair protein PSO2/SNM1 [Saccharomyces cerevisiae]	1.1e-97	1.1e-97	14.7837	-3.40433	-1.77254	-2.51589	-1.14907	3.1469	4.88737	-3.4561	3.99655	1.98173	3.97153	7.90202	14.7837
																					TC18407	similar to UP|Q93ZD7_ARATH (Q93ZD7) AT3g58970/F17J16_20 (MRS2-4), partial (51%)	GO:0046873;GO:0030001;GO:0016020	At3g58970.1	68416.m06572 magnesium transporter CorA-like family protein contains Pfam profile PF01544: CorA-like Mg2+ transporter protein	2.4e-106	2.4e-106	14.7636	-1.77358	-2.83752	-2.89823	-1.09406	4.43005	5.18599	-4.20414	4.73116	2.6038	4.14763	7.28933	14.7636
																					TC12878	similar to GB|CAB41466.1|4688596|ATH5682 inositol 1,4,5-trisphosphate 5-phosphatase {Arabidopsis thaliana}, partial (22%)	NA	At1g65580.1	68414.m07439 endonuclease/exonuclease/phosphatase family protein similar to inositol polyphosphate 5-phosphatase II isoform (GI:15418718) [Mus musculus]; contains 6 (5 weak) Pfam: Pf00400 WD domain, G-beta r-TRUNCATED-	1.8e-110	1.8e-110	14.7467	-5.42897	-2.49513	-2.34749	-0.184832	4.15973	6.7315	-3.63083	3.77541	5.06496	5.21682	6.26655	14.7467
																					DR919544	weakly similar to GB|AAV91510.1|56462502|AY830950 VGD1-like protein 2 {Arabidopsis thaliana}, partial (24%)	NA	At2g47030.1	68415.m05876 pectinesterase family protein contains Pfam profile: PF01095 pectinesterase	1.3e-61	1.3e-61	14.7337	-10.0849	-3.38897	0.527803	1.84629	2.84617	4.46498	-3.05223	1.49863	5.23581	7.09513	10.3353	14.7337
																					TC9078	similar to PRF|NP_974552.1|42572911|NP_974552 expressed protein {Arabidopsis thaliana}, partial (80%)	GO:0000004;GO:0005554;GO:0008372	At4g14950.1	68417.m02296 expressed protein	3.1e-164	3.1e-164	14.7124	-3.71225	-4.19936	-1.21725	1.64589	5.98937	4.14316	-4.39488	3.09128	0.741857	6.44613	11.0097	14.7124
																					TC18058	similar to UP|P5CS_ORYSA (O04226) Delta 1-pyrroline-5-carboxylate synthetase (P5CS) [Includes: Glutamate 5-kinase (Gamma-glutamyl kinase) (GK); Gamma-glutamyl phosphate reductase (GPR) (Glutamate-5-semialdehyde dehydrogenase) (Glutamyl-gamm , partial (41%)	NA	At2g39800.1	68415.m04888 delta 1-pyrroline-5-carboxylate synthetase A / P5CS A (P5CS1) identical to SP:P54887:P5C1_ARATH	3.4e-109	3.4e-109	14.6854	-4.61514	-4.23696	-4.0681	1.72954	6.85862	5.0793	-6.3711	4.68235	2.0309	5.27342	7.80355	14.6854
																					DT744788	similar to UP|Q52MZ2_TOBAC (Q52MZ2) TGA10 transcription factor, partial (42%)	NA	At5g06839.1	68418.m00773 bZIP family transcription factor contains Pfam profile: PF00170 bZIP transcription factor	3.8e-92	3.8e-92	14.6426	-0.594195	-4.52918	-1.82203	-1.83009	4.25636	4.28751	-4.09631	5.49288	2.23713	2.35845	6.05556	14.6426
																					TC13203	similar to PRF|NP_568713.1|18423070|NP_568713 expressed protein {Arabidopsis thaliana}, partial (34%)	NA	At5g49820.1	68418.m06170 expressed protein contains Pfam domain, PF04884: Protein of unknown function, DUF647	7.5e-66	7.5e-66	14.6324	-2.85257	-2.10454	-2.60854	-1.33789	3.57938	6.33608	-3.03876	5.23995	3.49118	3.85357	5.70778	14.6324
																					TC19448	weakly similar to UP|Q9SXW6_CICAR (Q9SXW6) Ring finger protein (Fragment), partial (63%)	NA	At5g01980.1	68418.m00117 zinc finger (C3HC4-type RING finger) family protein contains Pfam profile: PF00097 zinc finger, C3HC4 type (RING finger)	1.2e-49	1.2e-49	14.5816	-2.33957	-1.63073	-1.42565	-0.851629	2.09655	4.06727	-3.84935	5.30922	3.38081	4.24059	6.95634	14.5816
																					TC13000	NA	NA	At1g27910.1	68414.m03420 U-box domain-containing protein contains Pfam profile PF04564: U-box domain	0.0025	0.0025	14.5755	-2.29712	-1.31165	-1.30406	-1.04204	2.14023	4.33236	-2.11238	3.14696	2.94176	3.5626	5.01544	14.5755
																					TC13783	similar to PRF|NP_567588.1|18415316|NP_567588 nodulin-related {Arabidopsis thaliana}, partial (50%)	GO:0005554	At5g45275.1	68418.m05557 expressed protein Requires functional assignment.	6.8e-113	6.8e-113	14.5711	-4.07025	-1.38836	-0.592785	-3.70102	1.36572	6.03388	-0.991111	4.85321	7.58926	3.50209	5.02335	14.5711
																					TC17171	similar to UP|Q84W04_ARATH (Q84W04) At1g12390, partial (93%)	GO:0005554;GO:0016020	At1g12390.1	68414.m01432 cornichon family protein contains Pfam profile: PF03311 cornichon protein	2.1e-50	2.1e-50	14.5702	-0.542088	-3.30999	-4.45072	-1.5299	4.67773	3.0064	-5.95798	7.52094	1.56913	3.95488	7.38422	14.5702
																					TC15243	similar to PIR|T49142|T49142 CCR4-associated factor 1-like protein {Arabidopsis thaliana}, partial (82%)	GO:0009451;GO:0004540	At3g44260.1	68416.m04750 CCR4-NOT transcription complex protein, putative similar to SWISS-PROT:Q9UFF9 CCR4-NOT transcription complex, subunit 8 (CAF1-like protein, CALIFp) [Homo sapiens]	3.6e-99	3.6e-99	14.5202	-6.6512	-1.86763	-1.44679	0.0202285	1.78076	5.34945	-2.41906	2.20301	5.95505	6.22771	8.70282	14.5202
																					TC11138	similar to PRF|NP_565956.1|18405782|NP_565956 camphor resistance CrcB family protein {Arabidopsis thaliana}, partial (40%)	NA	At2g41705.1	68415.m05153 camphor resistance CrcB family protein contains Pfam profile PF02537: CrcB-like protein	3.7e-78	3.7e-78	14.5019	-4.89832	-2.67508	0.130987	-2.85669	3.09939	6.25307	-3.01244	5.43168	4.7318	2.83377	3.21426	14.5019
																					TC8434	weakly similar to UP|ZFNL1_ARATH (Q84W91) Zinc finger CCCH type domain containing protein ZFN-like 1, partial (57%)	GO:0003676;GO:0000004;GO:0008372	At2g47850.1	68415.m05972 zinc finger (CCCH-type) family protein contains Pfam domain, PF00642: Zinc finger C-x8-C-x5-C-x3-H type (and similar)	2.3e-125	2.3e-125	14.4532	0.368055	-4.77734	-8.68806	0.636629	11.4708	4.86844	-10.1554	10.0073	-0.848475	2.68817	10.168	14.4532
																					TC9723	similar to UP|Q705X3_MEDTR (Q705X3) Rho GDP dissociation inhibitor 2, partial (80%)	GO:0005094;GO:0000004;GO:0005737	At3g07880.1	68416.m00963 Rho GDP-dissociation inhibitor family protein similar to SP|P52565 Rho GDP-dissociation inhibitor 1 (Rho GDI 1) (Rho-GDI alpha) {Homo sapiens}; contains Pfam profile PF02115: RHO protein GDP dis-TRUNCATED-	4.6e-87	4.6e-87	14.448	-4.66945	-5.00043	-0.705251	-1.57964	3.98903	3.99877	-4.85966	6.29239	4.98325	4.53624	9.9039	14.448
																					DT739565	similar to GB|AAT41852.1|48310609|BT014869 At3g25600 {Arabidopsis thaliana}, partial (91%)	NA	At1g18530.1	68414.m02312 calmodulin, putative similar to calmodulin GI:1565285 from [Toxoplasma gondii]	7.1e-59	7.1e-59	14.4403	-5.50437	-3.72516	-0.933019	0.488719	2.52369	3.76252	-3.03535	3.25238	3.23827	5.11584	7.7287	14.4403
																					TC12438	similar to PIR|T05269|T05269 adenylyl cyclase-associated protein [imported] {Arabidopsis thaliana}, partial (41%)	NA	At4g34490.1	68417.m04903 cyclase-associated protein (cap1) identical to cyclase-associated protein (cap1) GI:3169136 from [Arabidopsis thaliana]	3.8e-76	3.8e-76	14.4401	-2.99402	-1.96129	-2.54986	-1.67733	2.90663	6.54655	-3.83455	6.59126	3.71307	4.93243	5.25107	14.4401
																					TC17005	similar to GB|AAP37831.1|30725618|BT008472 At4g31350 {Arabidopsis thaliana}, partial (50%)	NA	At4g30060.1	68417.m04276 expressed protein contains Pfam profile PF03267: Arabidopsis protein of unknown function, DUF266	6.7e-79	6.7e-79	14.3686	-3.59135	-3.26867	-1.83311	-0.876485	3.97687	5.52791	-3.96071	4.72783	3.39022	4.76936	8.12472	14.3686
																					TC13836	similar to UP|Q9LYN7_ARATH (Q9LYN7) Mei2-like protein, partial (16%)	NA	At5g07290.1	68418.m00832 RNA recognition motif (RRM)-containing protein Mei2-like protein - Arabidopsis thaliana, EMBL:D86122	1.9e-75	1.9e-75	14.3575	-7.52008	-1.07784	-0.286031	-1.58521	1.10112	8.91728	-1.07622	2.20115	8.03523	5.00333	5.11775	14.3575
																					TC16829	similar to UP|Q9SUY5_ARATH (Q9SUY5) Dihydrolipoamide S-acetyltransferase, partial (66%)	GO:0004742;GO:0005739	At3g52200.1	68416.m05733 dihydrolipoamide S-acetyltransferase, putative similar to dihydrolipoamide acetyltransferase (E2) subunit of PDC [Arabidopsis thaliana] GI:559395; contains Pfam profiles PF00198: 2-oxo acid dehy-TRUNCATED-	2.2e-206	2.2e-206	14.3551	-3.60548	-0.356179	-3.62799	-3.49105	3.72558	9.23355	-3.04297	6.75369	5.5503	6.62753	3.85499	14.3551
																					TC9311	similar to PIR|T04655|T04655 protein kinase homolog F8D20.10 {Arabidopsis thaliana}, partial (89%)	GO:0016301;GO:0008372	At2g17530.1	68415.m02028 protein kinase family protein identical to SRPK2 [Arabidopsis thaliana] gi|9843645|emb|CAC03676; contains protein kinase domain, Pfam:PF00069	1e-176	1e-176	14.3263	-10.0726	-4.26862	0.0120976	1.68477	2.84303	5.80945	-3.15497	1.76604	5.96191	8.25132	8.08442	14.3263
																					TC19735	weakly similar to UP|Q9FGP7_ARATH (Q9FGP7) Transcription factor Hap5a-like (At5g50480), partial (40%)	NA	At3g48590.1	68416.m05305 CCAAT-box binding transcription factor Hap5a, putative	4.9e-28	4.9e-28	14.32	-3.73756	-3.76344	-2.75422	-1.75663	4.76037	6.03793	-5.65064	6.46975	4.50201	4.18202	9.92256	14.32
																					TC9631	similar to UP|Q6NNG9_ARATH (Q6NNG9) At1g30300, partial (62%)	GO:0000004;GO:0008372;GO:0005554	At1g30300.1	68414.m03705 expressed protein similar to putative hydrolase GI:7270684 from [Arabidopsis thaliana]; similar to PhnP protein (GI:15620485) [Rickettsia conorii]	4.3e-88	4.3e-88	14.3031	-2.72996	-1.24541	-2.97925	-1.35817	3.5974	4.42146	-1.81539	4.36722	3.87069	4.76971	3.69421	14.3031
																					TC14770	weakly similar to UP|Q761Y4_ORYSA (Q761Y4) BRI1-KD interacting protein 130, partial (10%)	NA	At2g37480.2	68415.m04598 expressed protein	7.4e-13	7.4e-13	14.2845	-2.47531	-4.7299	-2.70046	-1.7495	6.35144	6.45661	-6.44864	10.1301	2.98337	1.68396	7.65356	14.2845
																					DT765557	similar to UP|Q4F885_GOSHI (Q4F885) Endo-alpha-1,4-glucanase, partial (25%)	NA	At5g20950.1	68418.m02489 glycosyl hydrolase family 3 protein beta-D-glucan exohydrolase, Nicotiana tabacum, EMBL:AB017502	6.7e-63	6.7e-63	14.2682	-3.30278	-4.55612	-2.05721	-0.249399	5.94069	3.69324	-6.18906	6.50842	2.87306	3.91714	9.90283	14.2682
																					TC15636	weakly similar to PRF|NP_186923.1|15232960|NP_186923 aspartyl protease family protein {Arabidopsis thaliana}, partial (61%)	GO:0031225;GO:0006508;GO:0004194	At1g05840.1	68414.m00611 aspartyl protease family protein contains Pfam PF00026: Eukaryotic aspartyl protease	1.7e-151	1.7e-151	14.2531	-11.3403	-0.106339	0.615127	-0.840958	-0.458212	7.47221	0.370444	0.225026	11.3991	9.63917	8.18954	14.2531
																					TC13845	similar to PRF|NP_564267.1|18396122|NP_564267 peptidyl-prolyl cis-trans isomerase cyclophilin-type family protein {Arabidopsis thaliana}, partial (89%)	GO:0006457;GO:0003755	At1g26940.1	68414.m03284 peptidyl-prolyl cis-trans isomerase cyclophilin-type family protein contains Pfam domain, PF00160: peptidyl-prolyl cis-trans isomerase, cyclophilin-type	4e-88	4e-88	14.2389	-2.05338	-2.34882	-1.36691	-0.74657	4.99354	4.14236	-4.33795	5.9905	2.18982	3.04356	7.71964	14.2389
																					TC9563	similar to UP|Q947K6_MEDVA (Q947K6) CDK-activating kinase, partial (97%)	GO:0000074;GO:0007283;GO:0007089;GO:0000166;GO:0045893;GO:0005737;GO:0000079;GO:0006468;GO:0005667;GO:0008283;GO:0008284;GO:0050681;GO:0030521;GO:0009574;GO:0004702;GO:0016301;GO:0051301;GO:0007141;GO:0007126;GO:0030544;GO:0010005;GO:0005524;GO:0016251;GO:0005634;GO:0006275;GO:0000082;GO:0045034;GO:0004672;GO:0007095;GO:0006367;GO:0004674;GO:0000086;GO:0004693;GO:0005675;GO:0016740;GO:0000910;GO:…	At1g73690.1	68414.m08533 cell division protein kinase, putative similar to cell division protein kinase 7 [Homo sapiens] SWISS-PROT:P50613	2.1e-153	2.1e-153	14.2197	-8.60835	0.493196	-0.85757	-2.41124	0.3502	9.35901	-0.345488	1.07897	8.08335	4.07013	3.25201	14.2197
																					TC16208	similar to UP|Q9LZ74_ARATH (Q9LZ74) 3-phosphoinositide-dependent protein kinase-1 PDK1, partial (92%)	GO:0016301;GO:0008372	At5g04510.1	68418.m00451 3-phosphoinositide-dependent protein kinase, putative similar to 3-phosphoinositide-dependent protein kinase-1 [Oryza sativa] gi|5001830|gb|AAD37166	3.9e-202	3.9e-202	14.2075	-1.03529	-1.15874	-12.0214	0.596895	7.80044	5.64191	-9.73898	5.47269	0.285777	8.52674	9.1474	14.2075
																					TC16275	similar to UP|Q9SSP4_ARATH (Q9SSP4) F3N23.2 protein (At1g72820/F3N23_2), partial (91%)	GO:0006810;GO:0005743;GO:0006839;GO:0005488	At1g72820.1	68414.m08419 mitochondrial substrate carrier family protein contains Pfam profile: PF00153 mitochondrial carrier protein	1.9e-90	1.9e-90	14.1947	-4.302	-3.37448	-2.00256	-0.333468	5.58539	5.67351	-6.40157	5.32315	3.47202	5.67476	8.53943	14.1947
																					TC14372	similar to UP|Q8LEE8_ARATH (Q8LEE8) Lipoic acid synthase-like protein, partial (77%)	GO:0046872;GO:0005739;GO:0005506;GO:0017140;GO:0009105;GO:0016992;GO:0003824;GO:0020011;GO:0009107	At5g08415.1	68418.m00991 lipoic acid synthase family protein similar to lipoic acid synthase from Arabidopsis thaliana [gi:3928758], from Mus musculus [gi:14669826] Pfam profile PF04055: radical SAM domain protein -TRUNCATED-	1.1e-156	1.1e-156	14.1573	-2.70564	-2.60976	-0.912382	-1.88147	4.07037	5.65069	-4.24927	6.98737	2.94206	2.87278	5.88315	14.1573
																					TC11912	NA	NA	At5g40450.1	68418.m04905 expressed protein	0.00011	0.00011	14.1507	-5.0914	-3.38026	-1.59567	-0.745163	4.58893	6.36631	-2.95595	3.62699	2.71607	5.23066	5.35663	14.1507
																					TC16598	similar to PRF|NP_200895.2|42568678|NP_200895 regulator of chromosome condensation (RCC1) family protein {Arabidopsis thaliana}, partial (82%)	GO:0008536	At5g60870.1	68418.m07636 regulator of chromosome condensation (RCC1) family protein weak similarity to UVB-resistance protein UVR8 [Arabidopsis thaliana] GI:5478530; contains Pfam profile PF00415: Regulator of chromosom-TRUNCATED-	3.9e-161	3.9e-161	14.1382	0.786573	-2.31995	-4.22294	-4.35137	4.78247	4.61584	-3.02259	9.97252	2.92645	2.16427	3.56098	14.1382
																					DT741615	similar to PRF|NP_176490. DNA-directed RNA polymerase alpha subunit family protein {Arabidopsis thaliana}, partial (1%)	NA	At4g16500.1	68417.m02497 cysteine protease inhibitor family protein / cystatin family protein similar to SP|Q06445 Cysteine proteinase inhibitor (Cystatin) {Vigna unguiculata}; contains Pfam profile PF00031: Cystatin do-TRUNCATED-	5.5e-07	5.5e-07	14.1336	-3.4723	-1.87858	-0.656733	-2.48196	1.52215	5.20047	-2.22291	4.66612	4.24226	3.59226	3.37907	14.1336
																					TC18204	similar to UP|Q8RX89_ARATH (Q8RX89) AT5g23390/T32G24_2, partial (16%)	NA	At5g23390.1	68418.m02736 expressed protein contains Pfam profile: PF04842 plant protein of unknown function (DUF639)	5.8e-73	5.8e-73	14.0913	-1.70187	-2.09871	-2.75142	-2.18584	4.05839	3.75718	-4.52575	6.92953	3.23421	2.54992	5.00387	14.0913
																					TC11392	similar to UP|Q52ZI4_PEA (Q52ZI4) EARLY FLOWERING 3, partial (49%)	NA	At2g25920.1	68415.m03110 expressed protein	1.9e-49	1.9e-49	14.0907	-1.1588	-2.40714	-3.62064	-2.16786	5.59705	4.56455	-5.7983	7.30036	1.43318	2.27582	6.93054	14.0907
																					TC10463	similar to PRF|NP_176423.2|30696687|NP_176423 expressed protein {Arabidopsis thaliana}, partial (66%)	GO:0000004;GO:0005554;GO:0008372	At1g62330.1	68414.m07033 expressed protein contains Pfam PF03138: Plant protein family. The function of this family of plant proteins is unknown;	4.7e-154	4.7e-154	14.0862	-2.79671	-4.23926	-3.08487	-3.13693	4.4647	8.35235	-6.13403	8.72057	6.48523	6.76624	12.0079	14.0862
																					TC14206	similar to UP|Q6UN74_TOBAC (Q6UN74) Ntp302 (Ntp101), partial (39%)	NA	At3g13400.1	68416.m01685 multi-copper oxidase type I family protein similar to pollen-specific BP10 protein [SP|Q00624][Brassica napus]; contains Pfam profile: PF00394 Multicopper oxidase	3.7e-94	3.7e-94	14.0744	-11.2565	-5.16177	1.48871	2.46209	2.99301	3.84452	-2.98624	0.781023	5.66796	6.52809	10.1143	14.0744
																					TC18891	similar to UP|GPDA_CUPLA (P52425) Glycerol-3-phosphate dehydrogenase [NAD+] , partial (91%)	GO:0005975;GO:0051287;GO:0046168;GO:0004367;GO:0009331;GO:0005737;GO:0006072	At5g40610.1	68418.m04930 glycerol-3-phosphate dehydrogenase [NAD+] / GPDH strong similarity to SP|P52425 Glycerol-3-phosphate dehydrogenase [NAD+] (EC 1.1.1.8) {Cuphea lanceolata}; contains Pfam profile PF01210: NAD-de-TRUNCATED-	1.6e-156	1.6e-156	14.0601	-4.06596	-4.36389	-1.23884	-0.0420843	4.39505	3.29035	-3.88786	4.36374	2.50788	3.5253	2.93683	14.0601
																					DR942528	similar to UP|Q7Y0V3_LILLO (Q7Y0V3) Actin filament bundling protein P-115-ABP, partial (11%)	NA	At4g30160.1	68417.m04289 villin, putative similar to villin 2 (VLN2) [Arabidopsis thaliana] GI:3415115, villin 3 (VLN3) [Arabidopsis thaliana] GI:3415117; contains Pfam profiles PF00626: Gelsolin repeat, PF02209: Villi-TRUNCATED-	3.6e-45	3.6e-45	14.0519	-4.51347	-1.24322	-2.56808	-0.233859	4.04493	5.41677	-3.22292	3.14612	2.52293	5.95017	7.96313	14.0519
																					DR951301	similar to UP|Q6Z7V1_ORYSA (Q6Z7V1) LMBR1 integral membrane protein-like, partial (36%)	NA	At5g65290.1	68418.m08212 LMBR1 integral membrane family protein contains Pfam PF04791: LMBR1-like conserved region	1.4e-119	1.4e-119	14.0431	-3.98036	-2.12122	-2.50724	-0.548708	3.89319	6.04009	-3.80683	2.79632	3.57994	4.11517	7.86835	14.0431
																					TC14540	similar to UP|Q9FVD3_CITSI (Q9FVD3) Hexokinase, complete	GO:0010182;GO:0005524;GO:0005739;GO:0004396	At2g19860.1	68415.m02322 hexokinase 2 (HXK2) identical to hexokinase 2 [Arabidopsis thaliana] Swiss-Prot:P93834	7.3e-208	7.3e-208	14.0382	-5.06741	-2.17513	-2.3515	-1.68917	4.24763	3.13685	-3.68427	5.49087	4.94787	5.38282	8.13403	14.0382
																					TC11270	similar to UP|Q5XET7_ARATH (Q5XET7) At4g28070, partial (50%)	NA	At4g30490.1	68417.m04329 AFG1-like ATPase family protein contains Pfam profile: PF03969 AFG1-like ATPase	5.1e-97	5.1e-97	14.0273	-3.04605	-2.19837	-2.09838	-2.20794	1.94476	4.50627	-3.29089	6.34367	5.08795	3.95155	6.57818	14.0273
																					TC18987	weakly similar to UP|Q8VZG4_ARATH (Q8VZG4) At1g21590/F24J8_9, partial (25%)	NA	At1g77280.1	68414.m09000 protein kinase family protein contains Pfam domain, PF00069: Protein kinase domain	1.8e-92	1.8e-92	14.0244	3.30376	-3.36336	-12.8554	-0.473976	11.6274	5.60401	-13.0021	12.7821	-1.92513	4.07994	8.93927	14.0244
																					TC18994	similar to UP|Q9LSN5_ARATH (Q9LSN5) Gb|AAD22658.1 (AT3g17120/K14A17_24), partial (24%)	NA	At4g01960.1	68417.m00261 expressed protein	2.4e-28	2.4e-28	14.013	-2.60873	-4.36353	-2.85683	-0.457391	4.40515	5.02017	-6.02001	6.50581	2.31242	4.73491	7.06503	14.013
																					TC17792	similar to UP|Q70Z24_TOBAC (Q70Z24) Protein kinase CK2 alpha chain, complete	GO:0000074;GO:0004680;GO:0006359;GO:0004682;GO:0007623;GO:0000166;GO:0008604;GO:0007286;GO:0006468;GO:0005829;GO:0008283;GO:0008372;GO:0005956;GO:0005886;GO:0006974;GO:0008013;GO:0004702;GO:0016301;GO:0005524;GO:0016055;GO:0005634;GO:0007165;GO:0004672;GO:0000082;GO:0004674;GO:0000086;GO:0007456;GO:0000283;GO:0016740;GO:0006873;GO:0045475;GO:0007222;GO:0005515;GO:0004713;GO:0007242;GO:0030467;GO:…	At3g50000.1	68416.m05467 casein kinase II alpha chain 2 identical to casein kinase II, alpha chain 2 (CK II) [Arabidopsis thaliana] SWISS-PROT:Q08466	5e-161	5e-161	13.9878	-2.61432	-1.16815	-1.9345	-2.63165	1.27898	6.72287	-2.40693	3.26301	4.25378	3.83459	5.76043	13.9878
																					TC14323	similar to UP|O48916_ARATH (O48916) Fatty acid hydroxylase Fah1p (FAH1) (At2g34770/T29F13.2) , partial (94%)	GO:0003824;GO:0000038;GO:0008372	At2g34770.1	68415.m04269 fatty acid hydroxylase (FAH1) identical to fatty acid hydroxylase Fah1p GB:AF021804 GI:2736147 from [Arabidopsis thaliana]	7.3e-105	7.3e-105	13.9548	-1.25318	-3.47832	-1.70131	-2.90218	4.90542	4.9775	-4.91912	5.32216	3.3954	1.79485	6.19884	13.9548
																					TC11435	similar to UP|Q8VZC0_ARATH (Q8VZC0) DTDP-glucose 4-6-dehydratase-like protein, partial (82%)	GO:0000139;GO:0009225;GO:0048040;GO:0003824;GO:0016020;GO:0042732	At3g62830.1	68416.m07059 NAD-dependent epimerase/dehydratase family protein similar to UDP-glucuronic acid decarboxylase Uxs1p from Filobasidiella neoformans GI:14318327; contains Pfam profile PF01370 NAD dependent epim-TRUNCATED-	7.4e-160	7.4e-160	13.9509	-7.16667	-5.41168	-1.95481	1.86902	5.07505	3.90268	-5.02077	3.91987	3.24598	7.12323	10.055	13.9509
																					DR935924	similar to PRF|NP_180618.2|30684653|NP_180618 BTB/POZ domain-containing protein {Arabidopsis thaliana}, partial (23%)	NA	At2g30600.1	68415.m03728 BTB/POZ domain-containing protein contains Pfam PF00651: BTB/POZ domain; contains Interpro IPR000210/ PS50097: BTBB/POZ domain; similar to MigA (GI:1841872) [Dictyostelium discoideum]	1.4e-94	1.4e-94	13.9312	-8.26086	-3.37361	0.604885	-0.22561	1.86031	4.60553	-1.4833	2.09665	5.54122	5.82368	9.57829	13.9312
																					DR923332	similar to PRF|NP_188596.1|15230897|NP_188596 glycosyl hydrolase family 3 protein {Arabidopsis thaliana}, partial (25%)	NA	At3g19620.1	68416.m02487 glycosyl hydrolase family 3 protein similar to beta-xylosidase A GB:BAA28267 from [Aspergillus oryzae]	1.5e-97	1.5e-97	13.8973	2.38494	-3.94611	-4.81701	-3.24762	9.34641	3.92848	-9.30341	12.123	0.389475	1.42044	5.97259	13.8973
																					TC11316	similar to PRF|NP_565639.1|18401348|NP_565639 expressed protein {Arabidopsis thaliana}, partial (38%)	NA	At5g06380.1	68418.m00714 expressed protein ; expression supported by MPSS	3.5e-27	3.5e-27	13.8946	-10.7467	-2.16968	-0.868705	1.35039	2.13486	4.94249	-2.30344	1.50751	5.41229	9.11817	6.27755	13.8946
																					DT757661	weakly similar to UP|Q9ZTN4_PETHY (Q9ZTN4) PGPS/D3, partial (19%)	NA	At3g05900.1	68416.m00664 neurofilament protein-related similar to NF-180 (GI:632549) [Petromyzon marinus] similar to Neurofilament triplet H protein (200 kDa neurofilament protein) (Neurofilament heavy polypeptide) (NF--TRUNCATED-	4.9e-07	4.9e-07	13.8874	-12.2768	-1.7137	1.13684	0.107945	0.58027	6.68348	-0.463264	0.417762	8.51028	7.3241	9.75094	13.8874
																					DR948447	similar to UP|PRL1_ARATH (Q42384) PP1/PP2A phosphatases pleiotropic regulator PRL1, partial (21%)	NA	At4g15900.1	68417.m02416 PP1/PP2A phosphatases pleiotropic regulator 1 (PRL1) identical to PP1/PP2A phosphatases pleiotropic regulator PRL1 (SP:Q42384) [Arabidopsis thaliana], PRL1 [Arabidopsis thaliana] GI:577733; cont-TRUNCATED-	4.4e-45	4.4e-45	13.8839	-3.65542	-2.44023	-1.11653	-1.71866	2.79019	4.85835	-2.7685	4.04586	4.34967	3.94042	6.13393	13.8839
																					TC10190	weakly similar to PRF|NP_198235.1|15241944|NP_198235 calcium-binding EF hand family protein {Arabidopsis thaliana}, partial (58%)	GO:0005509;GO:0000004;GO:0008372	At5g28830.1	68418.m03546 calcium-binding EF hand family protein contains INTERPRO:IPR002048 calcium-binding EF-hand domain	6e-78	6e-78	13.8415	-4.57545	-3.23986	-2.8766	0.589472	4.80732	4.64744	-6.05952	5.51154	2.47701	6.86679	9.98832	13.8415
																					TC11604	similar to PRF|NP_850886.1|30690360|NP_850886 expressed protein {Arabidopsis thaliana}, partial (84%)	GO:0008372;GO:0005554	At5g26600.1	68418.m03182 expressed protein weak similarity to SP|P18549 Isopenicillin N epimerase (EC 5.-.- ) {Streptomyces clavuligerus}	4.7e-165	4.7e-165	13.7969	-0.02631	-2.49142	-4.59826	-2.77395	3.88494	6.29818	-5.4235	8.34079	2.44916	3.1429	3.56524	13.7969
																					TC11767	similar to PRF|NP_193473.1|15236071|NP_193473 expressed protein {Arabidopsis thaliana}, partial (41%)	NA	At4g17430.1	68417.m02609 expressed protein weak similarity to CigA protein [Mucor circinelloides] GI:9717020	5.4e-93	5.4e-93	13.7834	-0.30439	-2.74534	-3.5365	-1.98568	4.14969	6.02719	-5.26248	5.66215	1.8144	2.9257	6.10098	13.7834
																					TC16722	similar to UP|MCAT_ARATH (Q93XM7) Mitochondrial carnitine/acylcarnitine carrier-like protein (A BOUT DE SOUFFLE) (Carnitine/acylcarnitine translocase-like protein) (CAC-like protein), partial (94%)	GO:0006810;GO:0005743;GO:0006839;GO:0005488;GO:0005739	At5g46800.1	68418.m05766 mitochondrial carnitine/acyl carrier, putative / a bout de souffle (BOU) / CAC-like protein identical to SP|Q93XM7 Mitochondrial carnitine/acylcarnitine carrier-like protein (A BOUT DE SOUFFLE) -TRUNCATED-	1.9e-120	1.9e-120	13.7552	-1.8639	-1.88914	-6.30708	-0.567896	5.89481	6.19321	-6.68652	5.29065	1.63582	4.89287	8.62419	13.7552
																					TC13071	similar to UP|O48666_PANGI (O48666) Squalene synthase , partial (98%)	GO:0004310	At4g34640.1	68417.m04919 farnesyl-diphosphate farnesyltransferase 1 / squalene synthase 1 (SQS1) identical to SP|P53799 Farnesyl-diphosphate farnesyltransferase (EC 2.5.1.21) (Squalene synthetase) (SQS) (SS) (FPP:FPP fa-TRUNCATED-	2.1e-170	2.1e-170	13.7508	0.00533783	-2.23558	-4.40762	-0.866147	4.58898	5.21984	-7.51966	7.9532	0.883655	4.99728	3.13841	13.7508
																					TC9632	similar to UP|Q6NNG9_ARATH (Q6NNG9) At1g30300, partial (78%)	GO:0005554	At1g30300.1	68414.m03705 expressed protein similar to putative hydrolase GI:7270684 from [Arabidopsis thaliana]; similar to PhnP protein (GI:15620485) [Rickettsia conorii]	1.3e-111	1.3e-111	13.726	-4.18783	-2.38653	-2.50124	-1.78171	1.9838	6.2826	-3.79551	5.86166	4.04229	4.44201	8.56224	13.726
																					TC13399	similar to UP|ALA1_ARATH (P98204) Phospholipid-transporting ATPase 1 (Aminophospholipid flippase 1) , partial (3%)	NA	At5g04930.1	68418.m00521 phospholipid-transporting ATPase 1 / aminophospholipid flippase 1 / magnesium-ATPase 1 (ALA1) nearly identical to SP|P98204 Phospholipid-transporting ATPase 1 (EC 3.6.3.1) (Aminophospholipid fli-TRUNCATED-	1.2e-27	1.2e-27	13.7188	-0.030073	-3.10616	-4.66434	-1.94628	6.65097	5.94265	-5.32777	8.20301	1.62694	3.4125	3.5943	13.7188
																					TC11624	similar to UP|CYSZ_CUCMA (P49299) Citrate synthase, glyoxysomal precursor (GCS) , partial (93%)	GO:0004108;GO:0006099	At2g42790.1	68415.m05298 citrate synthase, glyoxysomal, putative strong similarity to SP|P49299 Citrate synthase, glyoxysomal precursor {Cucurbita maxima}; contains Pfam profile PF00285: Citrate synthase	1.3e-224	1.3e-224	13.7127	0.137345	-5.38318	-2.36208	-2.71389	7.91268	4.3777	-8.21898	11.4326	1.10569	1.78916	6.2571	13.7127
																					TC16934	similar to PRF|NP_569021.1|18425006|NP_569021 BSD domain-containing protein {Arabidopsis thaliana}, partial (32%)	NA	At5g65910.1	68418.m08296 BSD domain-containing protein contains Pfam profile PF03909: BSD domain	7.4e-50	7.4e-50	13.7116	-2.75947	-2.19622	-2.32095	-1.0391	4.08801	4.4862	-4.11235	4.04914	3.17458	4.14898	4.00499	13.7116
																					TC15933	similar to UP|Q9ZQ84_ARATH (Q9ZQ84) Expressed protein, partial (86%)	GO:0005554	At1g13860.1	68414.m01625 dehydration-responsive protein-related similar to early-responsive to dehydration stress ERD3 protein [Arabidopsis thaliana] GI:15320410; contains Pfam profile PF03141: Putative methyltransferas-TRUNCATED-	1e-139	1e-139	13.6947	-0.729447	-4.89564	-4.91732	0.265823	8.49122	6.40676	-11.1275	9.52948	0.311907	3.80818	5.21003	13.6947
																					TC17826	similar to UP|Q66GP5_ARATH (Q66GP5) At2g42230, partial (37%)	NA	At3g57890.1	68416.m06453 tubulin-specific chaperone C-related contains weak similarity to Tubulin-specific chaperone C (Tubulin-folding cofactor C) (CFC) (Swiss-Prot:Q15814) [Homo sapiens]	1.9e-88	1.9e-88	13.6654	-3.48981	-2.4854	-3.85774	0.778147	5.34398	5.39385	-5.72179	5.50996	2.10687	6.12797	10.2936	13.6654
																					TC13362	similar to PRF|NP_196976.2|30685021|NP_196976 protein kinase family protein {Arabidopsis thaliana}, partial (11%)	NA	At5g14720.1	68418.m01727 protein kinase family protein contains eukaryotic protein kinase domain, INTERPRO:IPR000719	3.4e-30	3.4e-30	13.6646	-6.02451	-2.51208	-1.29773	0.351137	3.04364	5.25399	-2.61856	1.87312	3.97132	6.25729	5.81475	13.6646
																					TC15152	weakly similar to UP|Q8W566_ARATH (Q8W566) AT3g15140/F4B12_5, partial (67%)	GO:0004527;GO:0005622	At3g15140.1	68416.m01915 exonuclease family protein contains exonuclease domain, Pfam:PF00929	4.9e-87	4.9e-87	13.6446	0.29986	-2.32698	-4.36893	-4.08805	3.7165	4.95963	-4.79235	8.08058	2.65072	3.7761	5.65407	13.6446
																					DT731537	similar to PRF|NP_195616.2|30692169|NP_195616 kinesin-related protein (MKRP2) {Arabidopsis thaliana}, partial (21%)	NA	At4g39050.1	68417.m05531 kinesin-related protein (MKRP2) kinesin motor protein - Ustilago maydis, PID:g2062750; identical to cDNA MKRP2 mRNA for kinesin-related protein GI:16902293, kinesin-related protein [Arabidopsi-TRUNCATED-	2.9e-85	2.9e-85	13.6387	-3.65991	-1.68754	-2.08412	-0.458946	2.16829	6.91029	-3.31856	3.38936	4.30967	5.40228	7.43454	13.6387
																					TC17610	similar to PRF|NP_189796.1|15228453|NP_189796 AT hook motif-containing protein-related {Arabidopsis thaliana}, partial (5%)	NA	At3g42100.1	68416.m04322 AT hook motif-containing protein-related very low similarity to SP|Q9UUA2 DNA repair and recombination protein pif1, mitochondrial precursor {Schizosaccharomyces pombe}; weak hit to Pfam profile-TRUNCATED-	1.2e-35	1.2e-35	13.6036	-3.27525	-2.36736	-3.90771	0.205446	4.53564	5.42793	-4.59636	3.81265	2.5789	4.45551	5.17662	13.6036
																					DR917631	similar to UP|Q9M9T8_ARATH (Q9M9T8) F6A14.22 protein, partial (21%)	NA	At1g18670.1	68414.m02330 protein kinase family protein contains Protein kinases ATP-binding region signature, PROSITE:PS00107 and Serine/Threonine protein kinases active-site signature, PROSITE:PS00108	9.5e-64	9.5e-64	13.6019	2.08884	-4.31508	-3.06921	-2.15715	7.23017	3.42338	-7.79311	12.7836	0.429188	1.29832	5.68896	13.6019
																					TC19809	weakly similar to UP|Q6NKW1_ARATH (Q6NKW1) At1g56230, partial (4%)	NA	At5g50350.1	68418.m06236 expressed protein	2.8e-09	2.8e-09	13.5944	0.0503332	-4.6116	-1.59019	-2.30035	3.48418	2.97546	-4.99068	4.85311	1.26709	1.55396	5.17192	13.5944
																					TC19968	similar to UP|Q9FZ15_SOLTU (Q9FZ15) Tuber-specific and sucrose-responsive element binding factor, partial (34%)	NA	At5g67300.1	68418.m08486 myb family transcription factor contains PFAM profile: myb DNA binding domain PF00249	2.8e-48	2.8e-48	13.5837	0.400186	-4.59482	-3.18426	-3.52867	7.23628	5.11721	-4.55633	7.95647	2.41097	1.87742	6.39775	13.5837
																					TC19960	NA	NA	At5g52450.1	68418.m06508 MATE efflux protein-related strong similarity to unknown protein (pir||T02324); contains Pfam profile PF01554 Uncharacterized membrane protein family	1.4e-64	1.4e-64	13.5785	-2.06944	-3.70393	-1.63993	-3.74874	4.36859	6.15159	-3.85339	6.26338	4.17474	3.04358	6.85492	13.5785
																					TC15702	similar to UP|Q944M2_ARATH (Q944M2) AT4g14500/dl3290w (At4g14500) (Expressed protein), partial (70%)	GO:0000004;GO:0005554;GO:0008372	At4g14500.1	68417.m02235 expressed protein weak similarity to SP|Q9UKL6 Phosphatidylcholine transfer protein (PC-TP) {Homo sapiens}	8.4e-159	8.4e-159	13.5566	-2.71097	-4.13142	-3.72215	0.452786	4.39303	4.11767	-5.39959	4.81577	2.07197	7.79592	9.08516	13.5566
																					TC12621	similar to UP|Q9SML5_CAPAN (Q9SML5) Knolle, partial (40%)	NA	At2g18260.1	68415.m02129 syntaxin-related protein, putative (SYP112) similar to SP|Q42374 Syntaxin-related protein KNOLLE (Syntaxin 111) (AtSYP111) {Arabidopsis thaliana}	1.2e-68	1.2e-68	13.5535	-0.722799	-3.05209	-3.07113	-2.17802	5.50135	5.6287	-3.97773	6.49331	2.3335	2.7212	5.77936	13.5535
																					TC9773	weakly similar to GB|CAE04680.1|32489778|OSJN00200 OSJNBb0018A10.9 {Oryza sativa (japonica cultivar-group)}, partial (55%)	GO:0016757;GO:0008375;GO:0016051;GO:0016020	At1g71070.1	68414.m08202 glycosyltransferase family 14 protein / core-2/I-branching enzyme family protein similar to glucosaminyl (N-acetyl) transferase GB:4758422 from [Homo sapiens]	1.1e-140	1.1e-140	13.5061	-0.00458045	-3.27912	-5.61012	-1.93716	8.21174	4.94299	-6.60107	9.66103	1.30351	4.0932	6.66589	13.5061
																					TC18873	weakly similar to PRF|NP_179201.1|15226670|NP_179201 expressed protein {Arabidopsis thaliana}, partial (32%)	NA	At2g16030.1	68415.m01838 expressed protein	4.4e-37	4.4e-37	13.4735	-1.38661	-2.78272	-3.72476	-2.09298	4.35203	4.9992	-4.24545	7.27027	2.3901	1.95545	5.82945	13.4735
																					TC19479	homologue to UP|O22613_KOSVI (O22613) Plasma membrane proton ATPase, partial (22%)	NA	At4g30190.1	68417.m04292 ATPase 2, plasma membrane-type, putative / proton pump 2, putative / proton-exporting ATPase, putative strong similarity to SP|P19456 ATPase 2, plasma membrane-type (EC 3.6.3.6) (Proton pump 2) -TRUNCATED-	3e-99	3e-99	13.4639	-8.16058	-4.59502	-0.321122	0.823697	3.61204	5.42176	-3.72593	2.89243	3.99109	6.05419	10.2888	13.4639
																					DT730437	similar to GB|AAS99713.1|46518463|BT012569 At3g27320 {Arabidopsis thaliana}, partial (24%)	NA	At3g27320.1	68416.m03414 expressed protein low similarity to PrMC3 [Pinus radiata] GI:5487873	1.4e-48	1.4e-48	13.4308	-1.75341	-3.12375	-2.26152	-1.36656	4.0631	4.77386	-4.06085	5.06683	2.30513	3.12259	6.57281	13.4308
																					TC8359	similar to UP|Q5HZ38_ARATH (Q5HZ38) At5g60550, partial (79%)	GO:0016301	At5g60550.1	68418.m07592 protein kinase family protein contains protein kinase domain, Pfam:PF00069	1.6e-139	1.6e-139	13.4303	-3.81923	-2.81943	-2.95022	-0.963619	1.75507	6.44145	-3.8225	4.61573	1.87695	6.201	7.09663	13.4303
																					TC18046	weakly similar to PRF|NP_181524.1|15225598|NP_181524 expressed protein {Arabidopsis thaliana}, partial (19%)	NA	At2g39950.1	68415.m04909 expressed protein	6.8e-37	6.8e-37	13.4283	-1.95556	-2.43912	-2.02202	-1.9169	2.90807	4.44662	-4.19978	6.35199	2.35942	2.79492	5.89343	13.4283
																					TC16296	similar to PRF|NP_566323.1|18398086|NP_566323 RabGAP/TBC domain-containing protein {Arabidopsis thaliana}, partial (90%)	GO:0000004;GO:0005554;GO:0008372	At3g07890.1	68416.m00964 RabGAP/TBC domain-containing protein similar to plant adhesion molecule 1 [Arabidopsis thaliana] GI:3511223; contains Pfam profile PF00566: TBC domain	1.1e-174	1.1e-174	13.4266	-1.65923	-1.36993	-3.31873	-4.47402	1.36258	6.54269	-3.29885	8.79347	4.95413	3.85707	4.63966	13.4266
																					DT750857	similar to UP|ACA9_ARATH (Q9LU41) Potential calcium-transporting ATPase 9, plasma membrane-type (Ca(2+)-ATPase isoform 9) , partial (6%)	NA	At3g21180.1	68416.m02677 calcium-transporting ATPase, plasma membrane-type, putative / Ca2+-ATPase, putative (ACA9) identical to SP|Q9LU41 Potential calcium-transporting ATPase 9, plasma membrane-type (EC 3.6.3.8) (Ca(2-TRUNCATED-	3e-36	3e-36	13.4248	-1.77885	-1.52484	-4.29671	-0.769134	4.91104	4.88091	-4.4024	5.53889	2.20284	5.15297	8.03679	13.4248
																					TC14725	similar to UP|Q93ZC9_ARATH (Q93ZC9) AT3g01640/F4P13_18, partial (85%)	GO:0005524;GO:0004335	At3g01640.1	68416.m00095 GHMP kinase family protein contains GHMP kinases putative ATP-binding protein domain, Pfam:PF00288	6.2e-125	6.2e-125	13.389	-5.64092	-0.236217	-2.32589	-1.27234	1.25021	8.13113	-1.80387	2.45721	6.39944	6.90801	7.56268	13.389
																					TC11654	similar to PRF|NP_568327.1|18417885|NP_568327 hydrolase, alpha/beta fold family protein {Arabidopsis thaliana}, partial (78%)	GO:0016787	At5g16120.1	68418.m01883 hydrolase, alpha/beta fold family protein similar to monoglyceride lipase from [Homo sapiens] GI:14594904, [Mus musculus] GI:2632162; contains Pfam profile PF00561: hydrolase, alpha/beta fold fa-TRUNCATED-	3.8e-124	3.8e-124	13.3755	-7.13965	-3.93129	0.296007	-0.03207	2.78836	4.16767	-2.58693	2.84278	5.27266	5.13758	7.23922	13.3755
																					TC18566	weakly similar to UP|Q8VZI8_ARATH (Q8VZI8) At1g07510/F22G5_9, partial (40%)	NA	At2g29080.1	68415.m03535 FtsH protease, putative similar to AAA-metalloprotease FtsH [Pisum sativum] GI:15021761; contains Pfam profiles PF01434: Peptidase family M41, PF00004: ATPase AAA family	8.9e-116	8.9e-116	13.3472	-1.49765	-4.34355	-0.450583	-4.20782	2.61562	4.25285	-2.72281	7.46888	4.17541	0.863563	2.6534	13.3472
																					TC10117	similar to UP|Q9ZPY9_ARATH (Q9ZPY9) Expressed protein (At2g46500/F11C10.19), partial (54%)	GO:0006512;GO:0000004;GO:0004428;GO:0008372	At5g24240.1	68418.m02852 phosphatidylinositol 3- and 4-kinase family protein / ubiquitin family protein contains INTERPRO:IPR000626 ubiquitin domain, Pfam profile PF00454: Phosphatidylinositol 3- and 4-kinase	8.9e-132	8.9e-132	13.317	-2.57357	-3.67642	-2.11939	-0.919478	4.39813	5.20472	-4.87479	5.97593	2.88464	3.93956	8.36872	13.317
																					TC15722	similar to PRF|NP_565388.1|18398123|NP_565388 expressed protein {Arabidopsis thaliana}, partial (75%)	GO:0000004;GO:0005739;GO:0008372;GO:0005554	At2g16460.1	68415.m01885 expressed protein	7.3e-73	7.3e-73	13.3128	-4.01758	-1.96912	-1.73136	-1.60767	2.71208	6.40996	-3.11992	3.01515	5.18568	4.99801	5.93723	13.3128
																					DR954090	similar to UP|Q9C585_ARATH (Q9C585) Ubiquitin-specific protease-like protein, partial (18%)	NA	At5g22030.1	68418.m02563 ubiquitin-specific protease 8, putative (UBP8) similar to ubiquitin-specific protease 8 partial sequence GI:11993469 [Arabidopsis thaliana]	9.8e-78	9.8e-78	13.2979	-2.76218	-2.2742	-1.73114	-1.31205	4.28538	4.04357	-4.27853	3.43429	3.15168	4.05438	5.86053	13.2979
																					TC11688	similar to UP|Q5ZDJ9_ORYSA (Q5ZDJ9) Protein kinase family protein-like, partial (58%)	NA	At1g22870.1	68414.m02855 protein kinase family protein contains protein kinase domain, Pfam:PF00069	5.1e-175	5.1e-175	13.2854	-4.35884	-2.94752	-2.3731	-0.908107	4.28967	7.2948	-4.3635	4.98356	3.64533	4.24281	9.06581	13.2854
																					TC12202	weakly similar to UP|Q94KD8_ARATH (Q94KD8) At1g02640/T14P4_11, partial (25%)	NA	At5g64570.1	68418.m08115 glycosyl hydrolase family 3 protein	9.3e-105	9.3e-105	13.2788	-5.01419	-1.98748	-0.773509	-2.09331	2.68942	5.85726	-2.63678	4.50412	5.53579	2.60649	5.89543	13.2788
																					TC14948	weakly similar to UP|Q8H6B4_DAUCA (Q8H6B4) Endo-beta-mannanase, partial (59%)	NA	At5g66460.1	68418.m08381 (1-4)-beta-mannan endohydrolase, putative similar to (1-4)-beta-mannan endohydrolase [Coffea arabica] GI:10178872; contains Pfam profile PF00150: Cellulase (glycosyl hydrolase family 5) -TRUNCATED-	1.6e-70	1.6e-70	13.2761	-4.35867	-2.88856	-0.742626	-2.11429	2.42179	6.10007	-2.3067	4.30113	5.38108	2.73497	7.11289	13.2761
																					TC15709	similar to UP|Q9SE96_ARATH (Q9SE96) FH protein interacting protein FIP1 (At1g28200/F3H9_12), partial (76%)	GO:0000004;GO:0005554;GO:0008372	At1g28200.1	68414.m03461 GRAM domain-containing protein / ABA-responsive protein-related similar to ABA-responsive protein [Hordeum vulgare] GI:4103635; contains Pfam profile PF02893: GRAM domain	4e-88	4e-88	13.2755	-7.68199	-1.45325	-0.92815	0.0363331	1.31898	4.93201	-1.57415	1.79584	5.13915	4.37483	7.04718	13.2755
																					DT761404	weakly similar to PRF|NP_191484.1|15231659|NP_191484 F-box family protein {Arabidopsis thaliana}, partial (12%)	NA	At4g14103.1	68417.m02177 F-box family protein contains F-box domain Pfam:PF00646	1.3e-20	1.3e-20	13.2743	-2.16704	-1.65824	-1.62176	-1.60913	2.99044	5.30218	-2.76254	4.15931	3.3918	3.23798	3.70557	13.2743
																					TC8585	weakly similar to PRF|NP_177234.1|15223242|NP_177234 expressed protein {Arabidopsis thaliana}, partial (65%)	GO:0000004;GO:0008372;GO:0005554	At1g70770.1	68414.m08158 expressed protein	2.6e-164	2.6e-164	13.2624	0.493503	-7.71978	-2.59634	-2.50012	6.8243	2.90701	-7.62145	9.0164	0.702107	0.750323	7.72978	13.2624
																					TC19418	homologue to UP|Q8L4A7_ARATH (Q8L4A7) At1g79210/YUP8H12R_1, partial (87%)	GO:0006511;GO:0005839;GO:0050875;GO:0004175;GO:0008233;GO:0004298;GO:0006510;GO:0000502	At1g79210.1	68414.m09235 20S proteasome alpha subunit B, putative nearly identical to SP|O23708 Proteasome subunit alpha type 2 (EC 3.4.25.1) (20S proteasome alpha subunit B) {Arabidopsis thaliana} and to At1g16470 -TRUNCATED-	6.8e-92	6.8e-92	13.2612	-2.23707	-2.69142	-1.71797	-2.19054	3.47027	5.74491	-3.06613	5.46043	3.70943	3.79844	6.9195	13.2612
																					TC16973	weakly similar to PRF|NP_187741.2|22330985|NP_187741 leucine-rich repeat family protein {Arabidopsis thaliana}, partial (47%)	GO:0005554	At5g05850.1	68418.m00643 leucine-rich repeat family protein contains Pfam PF00560: Leucine Rich Repeat domains; similar to (SP:Q9UQ13) Leucine-rich repeat protein SHOC-2 (Ras-binding protein Sur-8) (SP:Q9UQ13) {Homo sa-TRUNCATED-	1e-137	1e-137	13.2572	-7.06963	-3.27355	-0.861636	-2.40406	2.40369	6.67819	-3.07965	4.47728	3.0821	5.51832	6.45937	13.2572
																					TC9630	similar to UP|Q6NNG9_ARATH (Q6NNG9) At1g30300, partial (94%)	GO:0000004;GO:0008372;GO:0005554	At1g30300.1	68414.m03705 expressed protein similar to putative hydrolase GI:7270684 from [Arabidopsis thaliana]; similar to PhnP protein (GI:15620485) [Rickettsia conorii]	6.3e-138	6.3e-138	13.2559	-4.54115	-1.27985	-2.33201	-1.9956	2.0878	7.75513	-3.66832	4.79997	5.25085	3.56241	8.73715	13.2559
																					DR923222	similar to PRF|NP_973806.1|42571431|NP_973806 expressed protein {Arabidopsis thaliana}, partial (37%)	NA	At1g10740.1	68414.m01225 expressed protein	2.6e-68	2.6e-68	13.2152	-5.11151	-2.28252	-1.39253	-1.8263	2.63635	7.16015	-2.9847	4.1112	5.4441	4.97536	6.7361	13.2152
																					DR923080	similar to UP|Q9ZR47_DAUCA (Q9ZR47) Neutral invertase , partial (25%)	NA	At3g06500.1	68416.m00754 beta-fructofuranosidase, putative / invertase, putative / saccharase, putative / beta-fructosidase, putative similar to neutral invertase [Daucus carota] GI:4200165; contains Pfam profile PF0485-TRUNCATED-	7.4e-64	7.4e-64	13.2095	-3.51252	-4.57937	-0.324262	-0.175756	3.4314	3.56658	-3.2095	3.76764	3.06769	3.35796	7.43221	13.2095
																					TC10809	weakly similar to PRF|NP_176656.1|15217739|NP_176656 glycosyl hydrolase family 17 protein {Arabidopsis thaliana}, partial (41%)	NA	At2g19440.1	68415.m02269 glycosyl hydrolase family 17 protein similar to elicitor inducible chitinase Nt-SubE76 GI:11071974 from [Nicotiana tabacum]; an isoform contains a non-consensus GA-AG intron	3.6e-80	3.6e-80	13.183	-11.2467	-4.21636	0.630055	2.28805	2.92693	4.92823	-2.96763	1.06796	4.03707	6.12335	10.9266	13.183
																					TC11822	similar to UP|Q940S9_ARATH (Q940S9) AT3g57890/T10K17_100, partial (25%)	NA	At3g57890.1	68416.m06453 tubulin-specific chaperone C-related contains weak similarity to Tubulin-specific chaperone C (Tubulin-folding cofactor C) (CFC) (Swiss-Prot:Q15814) [Homo sapiens]	6e-78	6e-78	13.1797	-2.63534	-2.61809	-3.57908	-0.222294	4.99252	5.29312	-4.7532	5.01804	2.05745	4.24695	7.7989	13.1797
																					TC8604	homologue to UP|UPTG2_SOLTU (Q8RU27) Alpha-1,4-glucan-protein synthase [UDP-forming] 2 (UDP-glucose:protein transglucosylase 2) (UPTG 2) , partial (95%)	GO:0000004;GO:0009832;GO:0016760;GO:0005795;GO:0005554;GO:0008372;GO:0000138;GO:0016020	At5g15650.1	68418.m01831 reversibly glycosylated polypeptide-2 (RGP2) identical to reversibly glycosylated polypeptide-2 [Arabidopsis thaliana] GI:2317731	6.4e-177	6.4e-177	13.1708	-3.48411	-4.51825	-2.94736	-1.19808	5.5155	7.14772	-6.5104	7.43179	2.25398	3.50606	9.27954	13.1708
																					TC14413	similar to UP|Q506K3_DATIN (Q506K3) Squalene monooxygenase, partial (49%)	NA	At1g58440.1	68414.m06648 squalene monooxygenase, putative / squalene epoxidase, putative similar to SP|O65404 (SE 1,1), SP|O65402 (SE 1,2) 6566341 dbj AB008021.1 AB008021	2.2e-116	2.2e-116	13.162	-1.67251	-4.4784	-1.46606	-0.856956	5.06333	3.92119	-3.69239	5.89111	2.58129	3.0744	5.01524	13.162
																					TC18512	weakly similar to UP|Q9FGC8_ARATH (Q9FGC8) Emb|CAB62313.1, partial (24%)	NA	At5g67020.1	68418.m08449 expressed protein	5.7e-42	5.7e-42	13.1573	-4.36547	-1.99132	-2.74671	-1.71147	4.39609	7.67052	-3.70997	5.2341	3.43212	5.20949	9.14917	13.1573
																					DR934394	similar to UP|Q8VZF5_ARATH (Q8VZF5) AT3g14400/MLN21_18, partial (5%)	NA	At3g14400.1	68416.m01822 ubiquitin-specific protease 25 (UBP25) similar to GI:11993490	3.7e-13	3.7e-13	13.1322	-1.29066	-1.65299	-2.41311	-2.45603	2.84145	4.88491	-3.07225	4.42517	2.64804	3.42432	4.31483	13.1322
																					TC16821	similar to PRF|NP_173435.1|15223762|NP_173435 expressed protein {Arabidopsis thaliana}, partial (19%)	NA	At1g20070.1	68414.m02512 expressed protein	5.5e-09	5.5e-09	13.1311	-3.66006	-1.72912	-2.08937	-0.524294	4.65848	5.24319	-4.01563	3.63077	2.12468	3.74726	6.64929	13.1311
																					TC15700	similar to UP|Q5N8H1_ORYSA (Q5N8H1) Hydrolase-like protein, partial (68%)	GO:0016787	At4g10030.1	68417.m01640 hydrolase, alpha/beta fold family protein contains Pfam profile PF00561: hydrolase, alpha/beta fold family	8.2e-129	8.2e-129	13.1247	0.262344	-2.72586	-5.51665	-4.59438	6.08713	5.60815	-6.80225	9.51284	3.3281	3.80032	6.37732	13.1247
																					DR918095	weakly similar to PRF|NP_174269.1|15220549|NP_174269 expressed protein {Arabidopsis thaliana}, partial (28%)	NA	At1g29760.1	68414.m03639 expressed protein	3e-53	3e-53	13.1161	-6.53905	0.153402	-1.22794	-1.11365	1.12517	8.24381	-1.41781	1.63993	5.34614	6.69255	5.36375	13.1161
																					TC15408	similar to UP|Q9M3H9_CICAR (Q9M3H9) Tubby-like protein, partial (78%)	GO:0045449;GO:0008081;GO:0003700;GO:0008372	At1g47270.1	68414.m05233 F-box family protein / tubby family protein contains Pfam profiles: PF00646 F-box domain, PF01167 Tub family; similar to Chain A, C-Terminal Domain Of Mouse Brain Tubby Protein Length(GI:6730158-TRUNCATED-	6e-126	6e-126	13.0432	-0.189461	-7.44717	-6.0004	0.882334	10.9487	2.50993	-11.0491	9.24124	-1.01098	4.03229	12.3722	13.0432
																					TC15505	similar to UP|Q9ASV2_ARATH (Q9ASV2) At1g06730/F4H5_22, partial (61%)	GO:0005737;GO:0016301;GO:0005634	At1g06730.1	68414.m00715 pfkB-type carbohydrate kinase family protein contains Pfam profile: PF00294 pfkB family carbohydrate kinase	8.3e-134	8.3e-134	13.0375	-1.02842	-2.12927	-1.94203	-2.24493	2.58061	4.96283	-1.80335	6.26883	3.68337	1.66142	3.84783	13.0375
																					TC9049	similar to UP|Q9FVC5_LILLO (Q9FVC5) Guanylate kinase , partial (65%)	GO:0004385;GO:0009117;GO:0008372	At3g57550.1	68416.m06408 guanylate kinase 2 (GK-2) identical to guanylate kinase (GK-2) [Arabidopsis thaliana] gi|7861798|gb|AAF70409	1.1e-115	1.1e-115	13.0336	1.25708	-4.07967	0.093745	-5.40594	2.81289	3.48129	-3.78159	6.80448	3.68584	-0.935307	1.74336	13.0336
																					TC10812	similar to UP|O82730_ARATH (O82730) Monogalactosyldiacylglycerol synthase , partial (84%)	GO:0016757;GO:0046509;GO:0019375;GO:0009941;GO:0009707;GO:0016036	At5g20410.1	68418.m02427 1,2-diacylglycerol 3-beta-galactosyltransferase, putative / monogalactosyldiacylglycerol synthase, putative / MGDG synthase, putative identical to monogalactosyldiacylglycerol synthase [gi:33676-TRUNCATED-	6.7e-182	6.7e-182	13.0331	-8.37456	-0.942389	1.56707	-1.80968	-0.338795	7.49878	0.362485	0.916538	9.76414	5.23773	6.76487	13.0331
																					TC14972	similar to UP|Q9SUN3_ARATH (Q9SUN3) UDP-glucose 4-epimerase-like protein, complete	GO:0009225;GO:0003824;GO:0008372	At1g30620.1	68414.m03745 UDP-D-xylose 4-epimerase, putative (MUR4) similar to SP|P55180 UDP-glucose 4-epimerase (EC 5.1.3.2) from Bacillus subtilis, GI:3021357 UDP-galactose 4-epimerase from Cyamopsis tetragonoloba; con-TRUNCATED-	5.4e-180	5.4e-180	13.0049	-6.73752	-1.97626	-1.39598	0.22884	2.77219	6.39548	-2.38914	2.20034	4.39071	7.23363	10.6607	13.0049
																					TC9672	weakly similar to PRF|NP_186906.1|15232927|NP_186906 phosphomannose isomerase type I family protein {Arabidopsis thaliana}, partial (86%)	GO:0005975;GO:0004476;GO:0008372	At3g02570.1	68416.m00248 phosphomannose isomerase type I family protein contains Pfam profile: PF01238 phosphomannose isomerase type I	2.3e-140	2.3e-140	13.0013	-7.53174	-3.46843	1.35323	-0.297154	1.13783	5.69396	-1.19121	1.40995	7.11918	4.58141	6.59512	13.0013
																					TC12880	similar to UP|Q9LPY7_ARATH (Q9LPY7) T23J18.14, partial (7%)	NA	At4g22520.1	68417.m03250 protease inhibitor/seed storage/lipid transfer protein (LTP) family protein contains Pfam profile: PF00234 protease inhibitor/seed storage/LTP family	3.3	0.96	12.9368	-4.69431	-3.01243	-0.934208	-1.90389	3.52681	7.10283	-2.92123	3.93478	5.15329	4.50684	7.31433	12.9368
																					TC16087	similar to PRF|NP_181392.1|15224904|NP_181392 expressed protein {Arabidopsis thaliana}, partial (15%)	NA	At2g38580.1	68415.m04739 expressed protein ; expression supported by MPSS	4.7e-39	4.7e-39	12.9216	-1.78846	-1.2348	-3.62381	-1.11025	4.93626	6.47296	-5.31106	5.23823	2.32802	3.6745	6.06309	12.9216
																					DT731992	similar to PRF|NP_191728.2|42566126|NP_191728 expressed protein {Arabidopsis thaliana}, partial (11%)	NA	At3g61690.1	68416.m06913 expressed protein	4.2e-56	4.2e-56	12.8951	-6.43319	-0.984626	2.3766	-4.01746	-1.00023	7.41352	0.906804	2.50578	10.1491	2.58604	3.46767	12.8951
																					TC19709	similar to UP|O04846_ARATH (O04846) Carbonic anhydrase (CAH1) , partial (32%)	NA	At3g52720.1	68416.m05808 carbonic anhydrase family protein low similarity to storage protein (dioscorin) [Dioscorea cayenensis] GI:433463; contains Pfam profile PF00194: Eukaryotic-type carbonic anhydrase	1.1e-44	1.1e-44	12.8942	-9.44506	-3.47756	2.17204	-0.271203	1.1645	4.71201	-1.01489	0.954539	6.60289	4.76102	5.85128	12.8942
																					TC15228	similar to PRF|NP_850867.1|30690243|NP_850867 uridylate kinase / uridine monophosphate kinase / UMP kinase (PYR6) {Arabidopsis thaliana}, partial (90%)	GO:0009041;GO:0008151;GO:0019201	At5g26667.1	68418.m03157 uridylate kinase / uridine monophosphate kinase / UMP kinase (PYR6) identical to uridylate kinase / UMP/CMP kinase SP:O04905 from [Arabidopsis thaliana]	2e-79	2e-79	12.8766	-3.99453	0.167882	-2.92593	1.02558	2.67926	8.45507	-2.99981	2.91006	3.2713	8.3433	9.05683	12.8766
																					TC14773	similar to PRF|NP_189573.1|15228658|NP_189573 expressed protein {Arabidopsis thaliana}, partial (74%)	GO:0005554	At3g29270.1	68416.m03674 expressed protein	2.2e-87	2.2e-87	12.8694	-0.5246	-1.9173	-4.64134	-2.29088	5.85907	5.29188	-5.20667	8.55696	2.42356	4.24652	6.67267	12.8694
																					TC16660	weakly similar to PRF|NP_175269.1|15221166|NP_175269 expressed protein {Arabidopsis thaliana}, partial (57%)	GO:0000004;GO:0005554;GO:0008372	At1g48360.1	68414.m05402 expressed protein ; expression supported by MPSS	1e-155	1e-155	12.8601	-4.31905	-1.9887	-1.58065	-2.38498	2.59155	4.87349	-3.11745	1.74078	1.88899	4.78254	6.29008	12.8601
																					TC16743	similar to PRF|NP_188329.1|15228944|NP_188329 tetratricopeptide repeat (TPR)-containing protein {Arabidopsis thaliana}, partial (66%)	GO:0000004;GO:0005554;GO:0008372	At3g17040.1	68416.m02175 tetratricopeptide repeat (TPR)-containing protein low similarity to SP|Q9FNS4 PsbB mRNA maturation factor Mbb1, chloroplast precursor {Chlamydomonas reinhardtii}; contains Pfam profile: PF00515:-TRUNCATED-	4.9e-202	4.9e-202	12.8366	0.743787	-6.27059	-4.7188	-0.504851	10.586	2.69085	-7.93431	6.18302	-0.207884	3.06771	5.55048	12.8366
																					TC13491	similar to PRF|NP_194934.1|15236653|NP_194934 calcium-binding EF hand family protein {Arabidopsis thaliana}, partial (28%)	NA	At4g32060.1	68417.m04563 calcium-binding EF hand family protein contains INTERPRO:IPR002048 calcium-binding EF-hand domain	2.6e-68	2.6e-68	12.8211	-1.94738	-4.38216	-0.996483	-1.72661	3.84121	3.7847	-4.05918	6.36618	3.37522	2.79791	5.86415	12.8211
																					DT759853	similar to PRF|NP_190745.1|15231033|NP_190745 tetratricopeptide repeat (TPR)-containing protein {Arabidopsis thaliana}, partial (28%)	NA	At3g51770.1	68416.m05677 tetratricopeptide repeat (TPR)-containing protein contains Pfam profile PF00515: TPR Domain	4.9e-115	4.9e-115	12.818	-4.4548	-2.10272	-1.78672	-0.609376	2.528	5.38099	-3.13534	3.23343	4.05693	6.80249	6.955	12.818
																					DT763463	similar to PRF|NP_180077.3|42569297|NP_180077 formin homology 2 domain-containing protein / FH2 domain-containing protein {Arabidopsis thaliana}, partial (8%)	NA	At2g25050.1	68415.m02996 formin homology 2 domain-containing protein / FH2 domain-containing protein contains formin homology 2 domain, Pfam:PF02128	1.4e-27	1.4e-27	12.8001	-1.25945	-1.29284	-0.694907	-0.624294	3.09876	2.24932	-2.96116	3.435	2.03632	3.34618	6.58836	12.8001
																					TC15896	similar to PRF|NP_568775.1|18423407|NP_568775 UDP-N-acetylglucosamine pyrophosphorylase-related {Arabidopsis thaliana}, partial (79%)	GO:0005554	At5g52560.1	68418.m06527 UDP-N-acetylglucosamine pyrophosphorylase-related contains weak similarity to UDP-N-acetylglucosamine pyrophosphorylase (EC 2.7.7.23) (Swiss-Prot:O74933) [Candida albicans]	2.6e-219	2.6e-219	12.7962	-4.01032	0.383048	-2.09099	-0.576459	1.88817	8.07032	-1.90749	2.12401	3.74329	7.54489	6.07847	12.7962
																					TC15202	similar to PRF|NP_196408.2|22326653|NP_196408 leucine-rich repeat family protein {Arabidopsis thaliana}, partial (96%)	GO:0005515	At5g07910.1	68418.m00914 leucine-rich repeat family protein contains leucine rich repeat (LRR) domains, Pfam:PF00560	1e-98	1e-98	12.7899	-5.69341	-0.165876	-2.99988	-1.19342	1.48438	7.57912	-1.94891	3.43549	6.23846	6.77443	7.31264	12.7899
																					DT742295	similar to UP|Q9ZQ84_ARATH (Q9ZQ84) Expressed protein, partial (13%)	NA	At2g03480.2	68415.m00308 dehydration-responsive protein-related similar to early-responsive to dehydration stress ERD3 protein [Arabidopsis thaliana] GI:15320410; contains Pfam profile PF03141: Putative methyltransferas-TRUNCATED-	1.2e-14	1.2e-14	12.771	-1.20918	-1.72365	-4.39158	-0.370774	4.23587	3.34321	-6.41453	5.89005	1.04329	2.70864	4.44429	12.771
																					DT740931	GB|AAF97477.1|15072344|AY005805 beta-lactam induced protein {Vibrio cholerae}, partial (11%)	NA	At1g65760.1	68414.m07463 F-box family protein contains F-box domain Pfam:PF00646	1.3e-07	1.3e-07	12.767	-4.55531	-1.00641	-2.93448	-0.724542	3.16108	7.72188	-3.39882	3.69283	2.75154	6.79168	6.90217	12.767
																					TC9312	similar to PRF|NP_974689.1|42573185|NP_974689 protein kinase family protein {Arabidopsis thaliana}, partial (38%)	NA	At4g35500.1	68417.m05044 protein kinase family protein contains eukaryotic protein kinase domain, INTERPRO:IPR000719	8.3e-75	8.3e-75	12.7597	-8.22772	-4.18669	0.1082	1.31588	2.99997	4.12688	-2.71983	1.59258	4.38045	5.90421	10.6026	12.7597
																					TC10906	similar to UP|Q84XY8_VITVI (Q84XY8) Wax synthase isoform 2 , partial (29%)	NA	At5g55370.1	68418.m06899 long-chain-alcohol O-fatty-acyltransferase family protein / wax synthase family protein contains similarity to wax synthase similarity to wax synthase wax synthase - Simmondsia chinensis, PID:g5-TRUNCATED-	1.8e-71	1.8e-71	12.7269	-2.89449	-4.33164	-0.697284	-1.25225	4.32794	4.69891	-2.95391	5.76985	2.0862	3.07901	5.0427	12.7269
																					TC9416	similar to UP|Q94AA4_ARATH (Q94AA4) AT4g26270/T25K17_80, partial (52%)	GO:0005945;GO:0003872;GO:0006096	At4g26270.1	68417.m03780 phosphofructokinase family protein similar to phosphofructokinase [Amycolatopsis methanolica] GI:17432243; contains Pfam profile PF00365: Phosphofructokinase	2.8e-119	2.8e-119	12.7267	-1.37076	-2.74096	-2.72202	-3.799	3.77261	6.97581	-3.55024	6.26656	2.36001	3.50886	4.62723	12.7267
																					TC14414	similar to UP|Q506K3_DATIN (Q506K3) Squalene monooxygenase, partial (35%)	NA	At4g37760.1	68417.m05345 squalene monooxygenase, putative / squalene epoxidase, putative similar to SP|O65404 (SE 1,1), SP|O65402 (SE 1,2), SP|O65403 (SE 2)	5e-81	5e-81	12.7235	-1.65264	-3.78438	-1.65146	-1.43546	5.82288	4.84808	-4.68704	6.38851	2.54933	3.63907	6.35198	12.7235
																					TC19287	NA	GO:0000004;GO:0005739;GO:0005554	At1g47420.1	68414.m05252 expressed protein identical to hypothetical protein GB:AAD46040 GI:5668814 from [Arabidopsis thaliana]	5.6e-59	5.6e-59	12.721	-2.87194	-0.187743	-2.79782	-2.00331	2.61333	8.35525	-2.59955	4.40018	4.24131	5.88521	5.33195	12.721
																					TC14466	similar to UP|Q8S9G4_9ASPA (Q8S9G4) Acyl-ACP thioesterase, partial (76%)	GO:0006633;GO:0000036	At4g13050.1	68417.m02036 acyl-[acyl carrier protein] thioesterase, putative / acyl-ACP thioesterase, putative / oleoyl-[acyl-carrier protein] hydrolase, putative / S-acyl fatty acid synthase thioesterase, putative stron-TRUNCATED-	9.7e-126	9.7e-126	12.7079	-0.562531	-3.78183	-3.68312	-3.00428	5.73305	6.02247	-5.6717	8.67556	2.10871	3.19086	7.16494	12.7079
																					DT746007	homologue to UP|Q5DZD6_VIBF1 (Q5DZD6) Chloramphenicol acetyltransferase , partial (6%)	NA	At4g39140.1	68417.m05541 expressed protein	5.9	0.997	12.6996	2.51207	-4.50372	-4.11173	-2.95666	7.3015	3.5993	-7.63684	6.92247	0.264102	0.995025	4.50444	12.6996
																					TC15009	similar to PRF|NP_178001.2|22330726|NP_178001 glycosyl transferase family 1 protein {Arabidopsis thaliana}, partial (52%)	GO:0016757;GO:0008372	At1g78800.1	68414.m09184 glycosyl transferase family 1 protein contains similarity to glycosyltransferase GI:871530 from [Saccharomyces cerevisiae], Alg2 mannosyltransferase [gi:3868942] from Rhizomucor pusillus; contai-TRUNCATED-	8.6e-102	8.6e-102	12.6881	-2.05262	-3.02966	-2.44117	-0.352758	2.69969	3.644	-4.43022	4.73873	1.93186	2.64526	5.51924	12.6881
																					TC10889	similar to PRF|NP_176052.3|42562792|NP_176052 clathrin adaptor complexes medium subunit family protein {Arabidopsis thaliana}, partial (96%)	GO:0030125;GO:0006886;GO:0005554	At1g56590.1	68414.m06508 clathrin adaptor complexes medium subunit family protein contains Pfam profile: PF00928 adaptor complexes medium subunit family	5.3e-173	5.3e-173	12.6556	-1.82212	-1.86918	-3.90859	-1.95229	4.5703	5.84646	-5.17842	6.44499	2.76864	5.39382	7.27876	12.6556
																					DT745236	similar to PRF|NP_181313.3|42569711|NP_181313 aldo/keto reductase family protein {Arabidopsis thaliana}, partial (45%)	NA	At2g37770.1	68415.m04637 aldo/keto reductase family protein similar to chalcone reductase [Sesbania rostrata][GI:2792155] and aldose reductase [GI:202852][Rattus norvegicus]	1.5e-45	1.5e-45	12.6088	-4.07822	-2.93561	-1.21827	-0.999729	3.52123	4.93126	-3.33696	3.40489	2.67483	3.60352	7.66352	12.6088
																					DR918535	similar to UP|Q9SSS0_ARATH (Q9SSS0) F6D8.10, partial (18%)	NA	At1g52680.1	68414.m05948 late embryogenesis abundant protein-related / LEA protein-related low similarity to late embryogenesis abundant proteins from [Brassica napus] SP|P13934, [Cicer arietinum] GI:2909420	9.2e-09	9.2e-09	12.5855	-1.55835	-4.403	-3.20914	-0.168062	6.36326	3.45418	-6.49821	6.09479	1.3167	2.84868	7.10955	12.5855
																					TC12813	similar to UP|HAP1_HUMAN (P54257) Huntingtin-associated protein 1 (HAP-1) (Neuroan 1), partial (3%)	NA	At3g23880.1	68416.m03001 F-box family protein contains F-box domain Pfam:PF00646	5e-12	5e-12	12.5842	-5.35113	-0.843371	-1.26896	-0.930368	1.4398	5.88651	-1.36711	1.30374	4.68417	6.89235	6.67186	12.5842
																					TC11351	similar to PRF|NP_199928.1|15241391|NP_199928 expressed protein {Arabidopsis thaliana}, partial (83%)	GO:0005554	At5g51150.1	68418.m06342 expressed protein similar to unknown protein (gb|AAD46013.1)	1e-210	1e-210	12.5783	-0.965271	-2.99433	-4.59617	-1.54315	5.10268	5.09511	-2.9807	6.76724	2.05951	4.20137	6.13714	12.5783
																					TC18125	similar to PRF|NP_198242.1|15241978|NP_198242 calcium-binding EF hand family protein {Arabidopsis thaliana}, partial (63%)	GO:0005509;GO:0000004;GO:0005737;GO:0005739;GO:0005634;GO:0008372	At1g54450.1	68414.m06211 calcium-binding EF-hand family protein contains Pfam profile: PF00036 EF hand	1.9e-161	1.9e-161	12.5669	-1.4182	-3.28537	-2.00378	-0.846241	5.07436	3.99249	-4.51983	5.09623	2.05532	2.77441	3.94902	12.5669
																					DR949450	similar to PRF|NP_191849.1|15229341|NP_191849 expressed protein {Arabidopsis thaliana}, partial (9%)	NA	At1g02990.2	68414.m00269 expressed protein similar to mature-parasite-infected erythrocyte surface antigen (GI:160409) {Plasmodium falciparum}	1.7e-59	1.7e-59	12.5551	-3.56748	-2.45638	-1.69721	-1.24462	1.83883	1.43998	-3.45475	4.49427	3.01662	4.04662	5.78541	12.5551
																					TC14724	similar to UP|Q93ZC9_ARATH (Q93ZC9) AT3g01640/F4P13_18, partial (96%)	GO:0005524;GO:0004335	At3g01640.1	68416.m00095 GHMP kinase family protein contains GHMP kinases putative ATP-binding protein domain, Pfam:PF00288	4.7e-149	4.7e-149	12.5176	-6.95844	-0.659917	-1.64284	-1.13157	1.30127	7.03247	-1.79017	2.20379	3.73244	5.26223	6.60324	12.5176
																					DR941840	similar to PRF|NP_566574.1|18401485|NP_566574 expressed protein {Arabidopsis thaliana}, partial (38%)	NA	At3g17365.1	68416.m02219 expressed protein low similarity to PIR|I46078 endothelin converting enzyme from Bos primigenius taurus	8e-40	8e-40	12.4896	-2.17321	-2.22863	-2.65145	-1.7123	2.26652	4.64749	-3.48196	5.0167	3.18165	4.20853	4.46247	12.4896
																					TC16194	similar to PRF|NP_566435.1|18399730|NP_566435 LEM3 (ligand-effect modulator 3) family protein / CDC50 family protein {Arabidopsis thaliana}, partial (87%)	GO:0000004;GO:0009543;GO:0005554;GO:0016020	At1g54320.1	68414.m06193 LEM3 (ligand-effect modulator 3) family protein / CDC50 family protein Similar to GI:11994416; GI:4966357; GI:4835763; GI:9757735 from [Arabidopsis thaliana]	9.4e-128	9.4e-128	12.4498	-1.52172	-2.02491	-1.3066	-3.96231	5.45259	6.21219	-3.77425	6.92032	5.37011	3.23153	7.35502	12.4498
																					TC10729	similar to UP|Q946Y1_GOSAR (Q946Y1) Ceramide glucosyltransferase, partial (96%)	GO:0008120	At2g19880.1	68415.m02324 ceramide glucosyltransferase, putative similar to ceramide glucosyltransferase (GI:14718995) [Gossypium arboreum]; weak similarity to Ceramide glucosyltransferase (Glucosylceramide synthase) (G-TRUNCATED-	1.3e-224	1.3e-224	12.448	-3.477	-0.108938	-0.907608	-4.64866	1.08272	9.39792	-0.965175	4.45802	6.64574	2.91415	4.29757	12.448
																					TC14216	similar to UP|Q9M3V0_FAGSY (Q9M3V0) Protein phosphatase 2C (PP2C) , complete	GO:0015071	At4g38520.1	68417.m05450 protein phosphatase 2C family protein / PP2C family protein similar to Ser/Thr protein phosphatase 2C (PP2C6) (GI:15020818) [Arabidopsis thaliana]; similar to protein phosphatase 2C (GI:3608412)-TRUNCATED-	4.7e-165	4.7e-165	12.4418	-4.88016	-3.77542	0.23473	-1.65966	2.85869	4.97936	-3.11701	3.05355	4.77373	3.55307	7.87153	12.4418
																					TC8836	similar to UP|SINA2_ARATH (Q9M2P4) Ubiquitin ligase SINAT2 (Seven in absentia homolog 2) , partial (88%)	GO:0006511;GO:0007275;GO:0005739;GO:0005634;GO:0005554	At3g58040.1	68416.m06470 seven in absentia (SINA) family protein similar to siah-1A protein [Mus musculus] GI:297035; contains Pfam profile PF03145: Seven in absentia protein family	4.7e-133	4.7e-133	12.4356	-0.502959	-3.48787	-2.37215	-2.22932	6.03562	4.78774	-5.42264	8.36326	2.07384	2.9458	4.77535	12.4356
																					TC8375	similar to UP|Q8L8M0_ARATH (Q8L8M0) ARF GAP-like zinc finger-containing protein ZIGA3, partial (19%)	NA	At5g54310.1	68418.m06764 ARF GAP-like zinc finger-containing protein ZIGA3 (ZIGA3) nearly identical to ARF GAP-like zinc finger-containing protein ZIGA3 GI:10441352 from [Arabidopsis thaliana]; contains InterPro accessi-TRUNCATED-	2.8e-57	2.8e-57	12.4315	-5.37719	-1.98035	-1.67696	-0.480201	2.80609	5.91452	-2.27818	3.39966	1.55145	4.2083	4.59801	12.4315
																					DT760300	weakly similar to UP|Q6H547_ORYSA (Q6H547) RNA binding protein Rp120, partial (23%)	NA	At5g61780.1	68418.m07753 tudor domain-containing protein / nuclease family protein contains Pfam domains PF00567: Tudor domain and PF00565: Staphylococcal nuclease homologue	3.1e-74	3.1e-74	12.4212	-5.07016	-3.77039	0.401068	-2.13304	2.70412	5.60746	-2.85814	4.85425	5.14244	2.94927	4.19337	12.4212
																					DT729150	similar to UP|Q9FV60_MAIZE (Q9FV60) Calmodulin-binding protein MPCBP, partial (21%)	NA	At2g43040.1	68415.m05341 calmodulin-binding protein similar to pollen-specific calmodulin-binding protein MPCBP GI:10086260 from [Zea mays]; contains Pfam profile PF00515: TPR Domain	2.7e-59	2.7e-59	12.4201	0.380738	-4.3115	-5.78048	-0.535079	7.38666	1.57784	-5.97868	7.33022	0.103342	3.86591	8.78318	12.4201
																					TC11771	homologue to UP|TBB3_ORYSA (Q40665) Tubulin beta-3 chain (Beta-3 tubulin), complete	GO:0000166;GO:0042267;GO:0046785;GO:0005737;GO:0005739;GO:0009409;GO:0042288;GO:0007010;GO:0007017;GO:0006886;GO:0007018;GO:0007411;GO:0005525;GO:0007059;GO:0003924;GO:0000226;GO:0043234;GO:0015630;GO:0015631;GO:0007507;GO:0005816;GO:0051258;GO:0009416;GO:0005200;GO:0005929;GO:0005856;GO:0005874;GO:0006928;GO:0016203;GO:0045298;GO:0030537;GO:0030467;GO:0051227;GO:0051082;GO:0003754;GO:0007067;GO:…	At1g75780.1	68414.m08801 tubulin beta-1 chain (TUB1) nearly identical to SP|P12411 Tubulin beta-1 chain {Arabidopsis thaliana}	6.8e-118	6.8e-118	12.4086	-2.12304	-5.3901	-3.73262	1.09923	6.25024	4.01416	-7.61712	3.94906	0.423815	4.36631	8.26379	12.4086
																					TC17667	similar to PRF|NP_851277.1|30698178|NP_851277 Golgi-localized GRIP domain-containing protein {Arabidopsis thaliana}, partial (40%)	NA	At5g66030.1	68418.m08314 Golgi-localized GRIP domain-containing protein contains Pfam profile PF01465: GRIP domain; supporting cDNA gi|20303028|gb|AF499634.1|	6.4e-129	6.4e-129	12.3829	-5.22566	-2.88875	-1.9877	-0.106872	4.14406	5.86434	-3.84134	5.03559	3.42871	6.9335	10.2403	12.3829
																					TC8865	weakly similar to PRF|NP_179134.1|15226087|NP_179134 leucine-rich repeat family protein {Arabidopsis thaliana}, partial (77%)	GO:0005515;GO:0007165;GO:0012505	At2g15320.1	68415.m01747 leucine-rich repeat family protein contains leucine rich-repeat (LRR) domains Pfam:PF00560, INTERPRO:IPR001611	7.2e-114	7.2e-114	12.3809	-4.26015	0.457867	-5.0599	0.362705	3.62426	7.08413	-4.00637	3.90493	3.52227	6.022	8.86921	12.3809
																					TC18188	weakly similar to UP|Q9FDV6_FAGSY (Q9FDV6) Protein kinase, partial (10%)	NA	At3g18750.1	68416.m02380 protein kinase family protein contains protein kinase domain, Pfam:PF00069	9e-22	9e-22	12.3182	0.891641	-1.59346	-4.63307	-3.58642	4.4835	6.19551	-4.60389	8.0058	1.93045	2.75664	4.07974	12.3182
																					TC16196	similar to PRF|NP_566051.1|18406854|NP_566051 calcineurin B subunit-related {Arabidopsis thaliana}, partial (76%)	GO:0005554	At2g45670.1	68415.m05678 calcineurin B subunit-related contains Pfam PF00036: EF hand domain and Prosite PS00018: EF-hand calcium-binding domain; contains Pfam profile PF01553: Acyltransferase; weak similarity to Calcin-TRUNCATED-	5.1e-184	5.1e-184	12.2741	-2.18975	-2.26081	-4.28575	-3.36626	4.37834	7.55762	-2.96029	7.25541	4.38638	4.52603	6.56357	12.2741
																					TC11900	similar to PRF|NP_197051.2|30685369|NP_197051 glycosyl transferase family 8 protein {Arabidopsis thaliana}, partial (21%)	NA	At5g15470.1	68418.m01811 glycosyl transferase family 8 protein contains Pfam profile: PF01501 glycosyl transferase family 8	7.4e-57	7.4e-57	12.2724	-4.36241	-2.23356	-1.00642	-0.186376	3.4582	6.77151	-2.92132	3.54884	5.05239	6.26395	10.8255	12.2724
																					TC16103	similar to UP|Q9MT31_SOLTU (Q9MT31) Cystathionine beta-lyase , partial (81%)	GO:0009507;GO:0019279;GO:0004121	At3g57050.1	68416.m06350 cystathionine beta-lyase, chloroplast / beta-cystathionase / cysteine lyase (CBL) identical to SP|P53780 Cystathionine beta-lyase, chloroplast precursor (EC 4.4.1.8) (CBL) (Beta-cystathionase) (-TRUNCATED-	1.1e-165	1.1e-165	12.2647	-2.45007	-2.65422	-4.17093	-0.391272	4.15853	4.49614	-5.73198	5.36711	2.11781	4.23913	4.94937	12.2647
																					TC14975	homologue to UP|NPM2_HUMAN (Q86SE8) Nucleoplasmin-2, partial (7%)	NA	At1g49850.1	68414.m05589 zinc finger (C3HC4-type RING finger) family protein contains Pfam profile: PF00097 zinc finger, C3HC4 type (RING finger)	4.6e-38	4.6e-38	12.2609	-1.65125	-3.82557	-1.71081	-1.22643	4.14088	4.13425	-4.69121	6.20176	2.84613	2.20587	4.43963	12.2609
																					TC18083	similar to PRF|NP_200289.1|15239749|NP_200289 RabGAP/TBC domain-containing protein {Arabidopsis thaliana}, partial (42%)	NA	At5g54780.1	68418.m06824 RabGAP/TBC domain-containing protein contains similarity to SP|P09379 GTPase-activating protein GYP7 (Fragment) {Yarrowia lipolytica}; contains Pfam profile PF00566: TBC domain	2.3e-78	2.3e-78	12.2588	-9.97521	-0.560191	-0.658435	0.299981	0.964378	6.92915	-0.888759	0.951839	7.0521	8.27693	8.82641	12.2588
																					TC14963	similar to PRF|NP_566566.1|18401370|NP_566566 protein phosphatase 2C family protein / PP2C family protein {Arabidopsis thaliana}, partial (83%)	GO:0015071	At3g17090.1	68416.m02180 protein phosphatase 2C family protein / PP2C family protein similar to Ser/Thr protein phosphatase 2C (PP2C6) (GI:15020818) [Arabidopsis thaliana]; similar to protein phosphatase 2C (GI:3608412)-TRUNCATED-	8.2e-145	8.2e-145	12.2581	-1.74326	-3.49435	-3.31515	-0.747034	4.95976	2.66346	-1.86943	3.74726	1.91526	4.09545	4.30807	12.2581
																					TC16166	similar to PRF|NP_565332.1|18396221|NP_565332 expressed protein {Arabidopsis thaliana}, partial (89%)	GO:0000004;GO:0008372;GO:0005554	At2g06005.1	68415.m00655 expressed protein	4.7e-126	4.7e-126	12.2528	-0.522221	-2.89642	-3.81945	-1.14633	5.03584	4.77051	-4.4777	7.57964	1.95223	2.91676	5.85703	12.2528
																					TC15367	similar to GB|AAL32012.1|16930693|AF436830 AT3g07810/F17A17_15 {Arabidopsis thaliana}, partial (59%)	GO:0003723	At3g07810.1	68416.m00955 heterogeneous nuclear ribonucleoprotein, putative / hnRNP, putative contains Pfam profile: PF00076 RNA recognition motif. (a.k.a. RRM, RBD, or RNP domain)	2.8e-159	2.8e-159	12.2466	-6.11476	0.236694	-2.58947	-0.793377	1.86336	9.1363	-1.78412	1.61456	7.83205	7.87652	7.38296	12.2466
																					TC8435	weakly similar to UP|ZFNL1_ARATH (Q84W91) Zinc finger CCCH type domain containing protein ZFN-like 1, partial (41%)	NA	At2g47850.1	68415.m05972 zinc finger (CCCH-type) family protein contains Pfam domain, PF00642: Zinc finger C-x8-C-x5-C-x3-H type (and similar)	6.8e-102	6.8e-102	12.2411	0.535914	-3.51242	-7.01981	0.894795	10.1491	2.99093	-4.71314	8.46181	-1.21265	5.47386	8.03659	12.2411
																					DR944746	similar to UP|Q8VDT0_MOUSE (Q8VDT0) Glycerol-3-phosphate dehydrogenase 2, partial (4%)	NA	At3g10370.1	68416.m01243 glycerol-3-phosphate dehydrogenase, putative similar to glycerol-3-phosphate dehydrogenase GB:BAA08926 from Mus musculus [SP|Q64521], Homo sapiens [GI:1020315], Rattus norvegicus [SP|P35571]; co-TRUNCATED-	2.7e-52	2.7e-52	12.2294	-5.17973	-0.538475	-0.698167	-1.4814	1.18643	7.52503	-0.990318	2.47717	6.09657	4.92672	5.58392	12.2294
																					TC17304	homologue to UP|Q8VY57_ARATH (Q8VY57) ADP-ribosylation factor-like protein, complete	GO:0005525;GO:0005737;GO:0005634;GO:0008372;GO:0012505;GO:0003926	At3g49870.1	68416.m05452 ADP-ribosylation factor, putative similar to ADP-ribosylation factor-like protein 1 (SP:P40616) [Homo sapiens]; ARF3 ADP-RIBOSYLATION FACTOR,GP:453191 Arabidopsis thaliana; contains domain PF000-TRUNCATED-	8.1e-90	8.1e-90	12.2127	-7.01445	-0.30401	-0.532429	-0.922271	0.553845	8.08638	-0.598794	1.49195	6.92016	6.32068	5.47074	12.2127
																					TC12209	similar to GB|BAB93227.1|21104635|AP003241 axi 1-like protein {Oryza sativa (japonica cultivar-group)}, partial (33%)	NA	At2g01480.1	68415.m00071 expressed protein contains Pfam PF03138: Plant protein family. The function of this family of plant proteins is unknown; previously annotated as 'axi 1 protein from Nicotiana tabacum -related' -TRUNCATED-	2.4e-51	2.4e-51	12.209	-2.14374	-3.60203	-3.70305	-2.02087	5.59093	7.19695	-6.52336	8.378	3.48495	4.46315	8.77206	12.209
																					DR932125	similar to PRF|NP_973565.1 expressed protein {Arabidopsis thaliana}, partial (3%)	NA	At2g30480.2	68415.m03713 expressed protein	1.7e-05	1.7e-05	12.1984	0.14209	-1.84666	-4.48286	-1.83379	4.35899	4.76658	-3.58671	7.97576	0.863643	3.34278	3.78593	12.1984
																					TC11521	similar to UP|SUVH6_ARATH (Q8VZ17) Histone-lysine N-methyltransferase, H3 lysine-9 specific 6 (Histone H3-K9 methyltransferase 6) (H3-K9-HMTase 6) (Suppressor of variegation 3-9 homolog 6) (Su(var)3-9 homolog 6) , partial (27%)	NA	At2g22740.1	68415.m02695 SET domain-containing protein (SUVH6) identical to SUVH6 [Arabidopsis thaliana] GI:13517753; contains Pfam profiles PF00856: SET domain, PF05033: Pre-SET motif, PF02182: YDG/SRA domain	7.9e-92	7.9e-92	12.1943	-4.78871	-2.14358	-0.923656	-2.19368	1.59144	6.78255	-2.28005	4.84112	3.21723	4.6278	6.87546	12.1943
																					DR932898	similar to UP|Q9SSR0_ARATH (Q9SSR0) F6D8.20, partial (45%)	NA	At1g52580.1	68414.m05936 rhomboid family protein contains PFAM domain PF01694, Rhomboid family	1.1e-54	1.1e-54	12.1746	-5.53228	-1.59009	1.18865	-2.8886	0.235121	4.83692	-0.219613	2.9504	6.16173	2.01144	3.97614	12.1746
																					TC13126	similar to PRF|NP_194440.1|15236983|NP_194440 RabGAP/TBC domain-containing protein {Arabidopsis thaliana}, partial (28%)	NA	At5g54780.1	68418.m06824 RabGAP/TBC domain-containing protein contains similarity to SP|P09379 GTPase-activating protein GYP7 (Fragment) {Yarrowia lipolytica}; contains Pfam profile PF00566: TBC domain	6.6e-56	6.6e-56	12.1651	-6.56562	-1.6755	-0.965312	-0.705625	1.5467	6.63436	-1.62311	3.26991	5.02951	5.74298	7.71581	12.1651
																					TC9493	weakly similar to PRF|NP_177180.1|15223079|NP_177180 expressed protein {Arabidopsis thaliana}, partial (61%)	GO:0000004;GO:0008372;GO:0005554	At1g70230.1	68414.m08081 expressed protein	9.4e-128	9.4e-128	12.1555	0.104672	-2.95446	-1.68923	-8.33532	3.53713	6.02911	-3.31709	10.0953	5.04835	0.747392	3.60963	12.1555
																					TC17341	weakly similar to PRF|NP_849715.2|42570214|NP_849715 interferon-related developmental regulator family protein / IFRD protein family {Arabidopsis thaliana}, partial (5%)	NA	At1g27760.3	68414.m03393 interferon-related developmental regulator family protein / IFRD protein family contains Pfam PF05004: Interferon-related developmental regulator (IFRD); similar to IFR1 protein GI:16580630 [Gal-TRUNCATED-	2.2e-68	2.2e-68	12.1509	-3.71438	-0.956896	-1.53742	-2.44441	1.08867	5.37554	-1.61733	3.52386	4.64811	3.89553	3.68102	12.1509
																					DR922022	similar to UP|Q9ZQ84_ARATH (Q9ZQ84) Expressed protein, partial (12%)	NA	At2g03480.2	68415.m00308 dehydration-responsive protein-related similar to early-responsive to dehydration stress ERD3 protein [Arabidopsis thaliana] GI:15320410; contains Pfam profile PF03141: Putative methyltransferas-TRUNCATED-	4.8e-10	4.8e-10	12.1483	-0.952739	-3.40957	-2.94713	-0.170105	6.58028	6.00435	-8.31887	5.20507	1.05769	3.24723	9.94128	12.1483
																					TC11106	NA	NA	At5g20030.1	68418.m02383 agenet domain-containing protein contains Pfam PF05641: Agenet domain	5.7e-15	5.7e-15	12.1389	-5.84993	-3.18272	0.994229	-1.21918	1.23169	4.38983	-1.90018	3.10926	4.96233	3.2098	6.49349	12.1389
																					TC8096	similar to UP|Q9XHC5_SOYBN (Q9XHC5) Precursor monofunctional aspartokinase, partial (80%)	GO:0009067;GO:0004072	At5g13280.1	68418.m01525 aspartate kinase identical to aspartate kinase [Arabidopsis thaliana] GI:4376158	1.9e-202	1.9e-202	12.1239	-1.88389	-1.05888	-3.21804	-6.44022	2.4767	5.72502	-2.44195	6.82504	4.9785	3.76157	3.20154	12.1239
																					TC16675	similar to PRF|NP_563805.1|18390845|NP_563805 expressed protein {Arabidopsis thaliana}, partial (81%)	GO:0000004;GO:0005554;GO:0008372	At1g67850.1	68414.m07745 expressed protein contains Pfam profile PF05212: Protein of unknown function (DUF707)	2.6e-155	2.6e-155	12.1163	-2.80594	1.74289	-3.85764	-3.90533	1.27677	9.62775	-1.49806	3.91049	5.26157	3.61744	4.01096	12.1163
																					DR934521	weakly similar to PRF|NP_197535.1|15241327|NP_197535 zinc finger (DHHC type) family protein / ankyrin repeat family protein {Arabidopsis thaliana}, partial (14%)	NA	At2g14255.1	68415.m01593 zinc finger (DHHC type) family protein contains Pfam profile PF01529: DHHC zinc finger domain; low similarity to SP:Q96GR4 Zinc finger DHHC domain containing protein 12 (Zinc finger protein 400)-TRUNCATED-	8e-28	8e-28	12.1104	-5.5774	-0.636912	-1.01554	-0.532354	1.36828	7.23209	-1.19517	0.996163	4.49905	5.34311	7.63189	12.1104
																					TC19331	NA	NA	At5g19420.1	68418.m02314 zinc finger protein, putative / regulator of chromosome condensation (RCC1) family protein similar to zinc finger protein [Arabidopsis thaliana] gi|15811367|gb|AAL08940	1.7e-18	1.7e-18	12.1009	0.583843	-4.70171	-5.38979	-1.75978	9.1555	4.12898	-4.18144	9.4746	0.955541	3.88344	7.03841	12.1009
																					DR928162	similar to PRF|NP_192112.1|15235210|NP_192112 expressed protein {Arabidopsis thaliana}, partial (20%)	NA	At4g02030.1	68417.m00273 expressed protein	1.4e-53	1.4e-53	12.0674	-0.514733	-3.30446	-1.8367	-0.913875	3.95644	3.01152	-4.39938	4.42344	1.06259	1.95191	6.27442	12.0674
																					TC10946	similar to UP|Q8L8A0_MEDTR (Q8L8A0) Type IIB calcium ATPase MCA5, partial (37%)	NA	At4g37640.1	68417.m05324 calcium-transporting ATPase 2, plasma membrane-type / Ca(2+)-ATPase isoform 2 (ACA2) identical to SP|O81108 Calcium-transporting ATPase 2, plasma membrane-type (EC 3.6.3.8) (Ca(2+)-ATPase isofor-TRUNCATED-	1.4e-172	1.4e-172	12.0583	-2.37207	-4.39605	0.32214	-1.57086	4.02289	1.53322	-3.8694	3.59523	2.49757	1.9075	3.72026	12.0583
																					DT763576	similar to PRF|NP_173105.1|15219285|NP_173105 glycosyl transferase family 1 protein {Arabidopsis thaliana}, partial (43%)	NA	At1g16570.1	68414.m01986 glycosyl transferase family 1 protein contains similarity to mannosyltransferase GI:1800223 from Dictyostelium discoideum; contains Pfam glycosyl transferase, group 1 family protein domain PF005-TRUNCATED-	1.6e-94	1.6e-94	12.0534	-4.97559	-1.09142	-3.33214	0.0217279	3.76011	7.94486	-2.7673	2.79317	4.00521	6.52889	9.98572	12.0534
																					TC17422	weakly similar to PRF|NP_196725.1|15239121|NP_196725 expressed protein {Arabidopsis thaliana}, partial (46%)	NA	At5g11640.1	68418.m01361 expressed protein predicted proteins, Drosophila melanogaster and Homo sapiens	3.5e-73	3.5e-73	12.0314	-3.25681	-1.40695	-4.82485	-0.0709373	3.92877	7.6567	-5.03422	4.81212	1.93497	4.63484	9.0449	12.0314
																					TC17707	similar to UP|GTR8_MOUSE (Q9JIF3) Solute carrier family 2, facilitated glucose transporter member 8 (Glucose transporter type 8) (Glucose transporter type X1), partial (4%)	NA	At2g48020.1	68415.m06010 sugar transporter, putative similar to ERD6 protein {Arabidopsis thaliana} GI:3123712, sugar-porter family proteins 1 and 2 [Arabidopsis thaliana] GI:14585699, GI:14585701; contains Pfam profile-TRUNCATED-	3.7e-85	3.7e-85	12.0251	-5.33182	-9.31168	2.15631	0.680439	2.04323	0.735472	-3.77706	2.9816	2.1774	1.00783	9.12003	12.0251
																					TC14424	weakly similar to PRF|NP_566214.1|18396691|NP_566214 expressed protein {Arabidopsis thaliana}, partial (54%)	GO:0005554	At3g03860.1	68416.m00398 expressed protein	4.2e-70	4.2e-70	12.0158	-5.24513	-2.63929	-0.322409	-0.0954219	1.5076	4.61653	-1.80265	2.59445	3.49343	4.2819	6.81779	12.0158
																					TC15283	similar to UP|Q8L745_ARATH (Q8L745) AT5g42220/K5J14_2, partial (25%)	NA	At5g42220.1	68418.m05139 ubiquitin family protein contains INTERPRO:IPR000626 ubiquitin domain	7.1e-91	7.1e-91	12.0077	-0.886507	-3.99161	-4.49687	-2.20946	7.5749	4.39668	-5.6553	6.89907	2.51054	3.94728	5.12484	12.0077
																					TC17754	weakly similar to PRF|NP_974032.1|42571883|NP_974032 expressed protein {Arabidopsis thaliana}, partial (10%)	NA	At1g54920.2	68414.m06269 expressed protein	8.8e-51	8.8e-51	12.006	-6.80469	0.0498786	-0.667626	-2.38492	0.610485	8.81655	-0.512895	2.67505	7.07252	6.32395	6.55193	12.006
																					TC10267	weakly similar to PRF|NP_194429.2|22328960|NP_194429 expressed protein {Arabidopsis thaliana}, partial (4%)	NA	At5g54920.1	68418.m06840 expressed protein	5.6e-31	5.6e-31	12.0041	-1.4218	-1.94541	-3.18296	-1.13923	4.62007	3.52463	-4.26556	6.74977	2.97531	3.09041	2.76597	12.0041
																					DR931275	similar to PRF|NP_564963.1|18409257|NP_564963 expressed protein {Arabidopsis thaliana}, partial (42%)	NA	At1g69380.1	68414.m07964 expressed protein predicated by genscan+	2.5e-61	2.5e-61	11.9974	-5.10446	0.818474	-0.705983	-3.55937	-0.093116	9.32356	0.0983201	1.87883	6.62576	4.04608	3.20448	11.9974
																					DR931804	weakly similar to UP|O23233_ARATH (O23233) Serine C-palmitoyltransferase like protein, partial (19%)	NA	At4g36480.1	68417.m05180 aminotransferase class I and II family protein similar to Serine palmitoyltransferase 1 (EC 2.3.1.50) from Homo sapiens [SP|O15269], Mus musculus [SP|O35704], Cricetulus griseus [SP|O54695] -TRUNCATED-	1.8e-28	1.8e-28	11.9968	-0.394275	-3.63407	-2.12252	-0.970986	3.97577	2.97757	-4.1875	5.57509	1.23778	2.17381	4.41904	11.9968
																					DT750831	NA	NA	At4g11720.1	68417.m01870 hypothetical protein	2.6e-57	2.6e-57	11.9895	-0.786712	-4.57192	-1.08928	-2.94714	4.75927	4.2974	-3.96825	8.01944	1.98847	1.46177	3.14108	11.9895
																					TC10810	weakly similar to UP|Q9FK49_ARATH (Q9FK49) Beta-1,3-glucanase-like protein, partial (35%)	NA	At2g19440.1	68415.m02269 glycosyl hydrolase family 17 protein similar to elicitor inducible chitinase Nt-SubE76 GI:11071974 from [Nicotiana tabacum]; an isoform contains a non-consensus GA-AG intron	3e-67	3e-67	11.9764	-9.53207	-3.74534	1.22742	2.19165	2.52489	3.9453	-2.17133	0.492227	5.3811	6.1987	11.8593	11.9764
																					DR953409	similar to UP|Q9SU24_ARATH (Q9SU24) Origin recognition complex subunit 1-like protein (Origin recognition complex 1b protein), partial (6%)	NA	At4g12620.1	68417.m01988 replication control protein, putative similar to origin recognition complex subunit 1 (Replication control protein 1)[Homo sapiens] SWISS-PROT:Q13415	1.2e-20	1.2e-20	11.9728	-3.0089	-2.99671	-1.05152	-2.10138	2.98558	6.00438	-3.62114	5.36293	4.17817	2.33195	3.31069	11.9728
																					TC10043	similar to UP|Q6K649_ORYSA (Q6K649) Kelch repeat-containing F-box protein-like, partial (84%)	GO:0000004;GO:0005554;GO:0008372	At1g67480.1	68414.m07685 kelch repeat-containing F-box family protein similar to SKP1 interacting partner 6 [Arabidopsis thaliana] GI:10716957; contains Pfam profiles PF01344: Kelch motif, PF00646: F-box domain	4.3e-123	4.3e-123	11.9586	-1.72941	-5.12186	-4.40283	0.683574	5.50252	4.05875	-7.60459	3.96286	0.481995	3.2647	9.1314	11.9586
																					TC12726	similar to UP|Q6S5L6_ORYSA (Q6S5L6) GAI protein, partial (62%)	NA	At1g14920.1	68414.m01783 gibberellin response modulator (GAI) (RGA2) / gibberellin-responsive modulator identical to GAI GB:CAA75492 GI:2569938 [Arabidopsis thaliana] (Genes Dev. In press)	3.6e-112	3.6e-112	11.9323	0.926217	-6.28697	-4.10288	0.270505	7.29056	2.35529	-9.60063	8.13372	-1.00545	2.94545	3.72535	11.9323
																					TC14723	similar to UP|Q84UD8_MEDTR (Q84UD8) Apyrase-like protein, partial (94%)	GO:0004551;GO:0009846;GO:0016887	At5g18280.1	68418.m02149 apyrase (APY2) identical to apyrase GI:6006801, GI:7672685 from [Arabidopsis thaliana]	1.2e-168	1.2e-168	11.9222	-1.29188	-3.44252	-3.12501	-1.44511	5.87693	5.53406	-5.84688	7.62815	2.3988	4.14337	5.68786	11.9222
																					TC19170	similar to SP|P80192|M3K9_HUMAN Mitogen-activated protein kinase kinase kinase 9 (Mixedlineage kinase 1) (Fragment). {Homo sapiens} , partial (9%)	NA	At1g21240.1	68414.m02654 wall-associated kinase, putative similar to wall-associated kinase 1 [Arabidopsis thaliana] GI:3549626; expressed in leaves and stems & induced by salicylic acid or INA (PMID:10380805)	8.4e-88	8.4e-88	11.9153	-3.51758	-3.65678	-0.122621	-2.33899	2.13255	4.95707	-2.64035	4.46195	3.70356	2.39423	5.15021	11.9153
																					TC17014	similar to UP|Q70KS2_ORYSA (Q70KS2) BSD protein (Fragment), partial (22%)	NA	At5g65910.1	68418.m08296 BSD domain-containing protein contains Pfam profile PF03909: BSD domain	1.5e-35	1.5e-35	11.8758	-2.03013	-3.55565	-2.16813	-0.520875	3.44439	4.94077	-5.39849	4.98742	2.04689	3.82745	6.85083	11.8758
																					DT727502	similar to UP|Q9ZQT4_IPONI (Q9ZQT4) H+/Ca2+ exchanger 2, partial (43%)	NA	At1g55730.1	68414.m06381 cation exchanger, putative (CAX5) similar to low affinity calcium antiporter CAX2 [Arabidopsis thaliana] gi|1488267|gb|AAB05914; similar to H+/Ca2+ exchanger 2 [Ipomoea nil] gi|4512263|dbj|BAA7-TRUNCATED-	4.7e-78	4.7e-78	11.8727	-6.31158	0.0352333	-0.826683	-1.39026	0.71351	6.64949	-0.517842	2.22933	4.90165	3.47584	4.95462	11.8727
																					TC16343	similar to GB|AAB63542.2|20198318|U90439 phospholipase D {Arabidopsis thaliana}, partial (57%)	GO:0004630	At2g42010.1	68415.m05197 phospholipase D beta 1 / PLD beta 1 (PLDBETA1) identical to SP|P93733 Phospholipase D beta 1 (EC 3.1.4.4) (AtPLDbeta1) (PLD beta 1) (PLDbeta) {Arabidopsis thaliana}; contains Pfam profiles: PF00-TRUNCATED-	1.7e-222	1.7e-222	11.8347	-7.83521	-1.10909	0.277166	-0.846787	0.468272	4.89918	-0.73067	0.933299	5.3459	6.84303	5.99291	11.8347
																					TC14735	similar to PRF|NP_188868.2|30686584|NP_188868 expressed protein {Arabidopsis thaliana}, partial (90%)	GO:0005554	At3g22290.1	68416.m02816 expressed protein	6.7e-150	6.7e-150	11.8241	-4.7506	-2.63959	-2.63092	-1.09089	3.22957	7.61821	-3.58014	4.56649	5.12488	5.36226	8.38485	11.8241
																					TC9926	weakly similar to PRF|NP_197774.1|15237842|NP_197774 expressed protein {Arabidopsis thaliana}, partial (27%)	GO:0005554	At1g07220.1	68414.m00768 expressed protein	6e-165	6e-165	11.8156	-3.64995	-2.14976	-3.84037	-3.69198	5.09907	8.5824	-3.9181	8.17192	6.00943	6.6739	9.95015	11.8156
																					TC8827	similar to OMNI|NTL03PA00972|AAG04360.1|9946878| TolA protein {Pseudomonas aeruginosa}, partial (5%)	NA	At5g27260.1	68418.m03252 hypothetical protein	1.1e-11	1.1e-11	11.8134	-4.27618	-3.50414	0.323388	-1.95221	1.82905	4.5428	-2.54741	4.21439	4.68089	2.85284	5.65315	11.8134
																					DT729747	NA	NA	At5g25820.1	68418.m03064 exostosin family protein contains Pfam profile: PF03016 exostosin family	0.021	0.021	11.797	-4.46747	-0.994092	-2.30169	-0.165221	2.6288	5.47679	-2.19272	2.20842	3.84509	4.03476	6.41878	11.797
																					DT735969	similar to UP|Q4V3B0_ARATH (Q4V3B0) At4g11990, partial (20%)	NA	At4g11990.1	68417.m01908 expressed protein hypothetical protein F7H19.40 - Arabidopsis thaliana, PID:e1310054	1.3e-34	1.3e-34	11.7693	0.88247	-2.24216	-2.86319	-2.25703	6.34632	4.79344	-6.35828	9.85357	0.833639	2.14004	4.97751	11.7693
																					TC13704	similar to PRF|NP_176421.1|15220761|NP_176421 transcription factor jumonji (jmjC) domain-containing protein {Arabidopsis thaliana}, partial (30%)	GO:0003700	At1g62310.1	68414.m07031 transcription factor jumonji (jmjC) domain-containing protein similar to nuclear protein 5qNCA [Homo sapiens] GI:13161188; contains Pfam profile PF02373: jmjC domain	3.5e-121	3.5e-121	11.7645	-0.982277	-2.62973	-5.57371	-0.342688	5.45129	5.03429	-5.92801	6.7462	1.35155	4.04119	7.7884	11.7645
																					DT745242	NA	NA	At4g39840.1	68417.m05645 expressed protein	5.4	0.996	11.7544	-4.08658	-1.23816	-1.46755	-1.99721	1.97592	7.5365	-2.27124	3.7991	5.37626	4.56627	5.58771	11.7544
																					TC13104	NA	NA	At5g38920.1	68418.m04707 hypothetical protein	0.0018	0.0018	11.7457	-1.88937	-2.40966	-3.00116	-2.22637	3.16719	5.34163	-4.32739	6.50494	3.24837	2.57194	5.68148	11.7457
																					DT745978	weakly similar to PRF|NP_191599.1|15232313|NP_191599 mitochondrial transcription termination factor-related / mTERF-related {Arabidopsis thaliana}, partial (6%)	NA	At3g60400.1	68416.m06755 mitochondrial transcription termination factor-related / mTERF-related contains Pfam profile PF02536: mTERF	5.7e-05	5.7e-05	11.7352	-1.17381	-1.91036	-3.43692	-1.59009	4.63629	4.30274	-4.18104	5.07851	2.0071	3.71363	5.59922	11.7352
																					TC17006	similar to GB|AAG30909.1|11120516|AF303982 cytokinin oxidase {Arabidopsis thaliana}, partial (41%)	NA	At1g75450.1	68414.m08764 FAD-binding domain-containing protein / cytokinin oxidase family protein similar to GB:CAA77151 from [Zea mays] [SP|Q9T0N8] (Plant J. 17 (6), 615-626 (1999))	6.4e-90	6.4e-90	11.6915	-3.93334	-2.4996	-1.69529	-0.701846	3.59477	4.7662	-2.44083	3.14838	2.99127	5.23202	6.86868	11.6915
																					TC14013	weakly similar to PRF|NP_191604.1|15232331|NP_191604 expressed protein {Arabidopsis thaliana}, partial (76%)	GO:0000004;GO:0008372	At3g60450.1	68416.m06761 expressed protein	1.5e-77	1.5e-77	11.6865	-1.3322	-4.85545	-3.53227	-0.389356	6.50099	3.75841	-5.61763	7.79448	2.44173	4.58155	6.84758	11.6865
																					DT753399	similar to UP|Q8W4M4_ARATH (Q8W4M4) Phosphate/phosphoenolpyruvate translocator-like protein, partial (59%)	NA	At3g10290.1	68416.m01233 phosphate translocator-related low similarity to SP|P52178 Triose phosphate/phosphate translocator, non-green plastid, chloroplast precursor (CTPT) {Brassica oleracea}, phosphoenolpyruvate/phosp-TRUNCATED-	8.3e-81	8.3e-81	11.6814	-0.971802	-2.61283	-5.81402	-0.863019	5.97122	5.67224	-6.03612	7.27532	1.51684	4.99489	7.91827	11.6814
																					DR950902	similar to UP|Q6YUI3_ORYSA (Q6YUI3) Retinoblastoma binding protein-like, partial (5%)	NA	At1g55010.1	68414.m06283 plant defensin-fusion protein, putative (PDF1.5) plant defensin protein family member, personal communication, Bart Thomma (Bart.Thomma@agr.kuleuven.ac.be); similar to antifungal protein 4 [Raph-TRUNCATED-	6	0.997	11.6731	-3.47055	-4.32864	-1.61338	1.60468	6.41618	3.21113	-5.29985	3.0358	1.50807	5.24598	11.0549	11.6731
																					DR931937	similar to PRF|NP_192575.2|30680726|NP_192575 KOW domain-containing transcription factor family protein {Arabidopsis thaliana}, partial (15%)	NA	At4g08350.1	68417.m01380 KOW domain-containing transcription factor family protein chromatin structural protein homolog Supt5hp - Mus musculus,PID:g2754752	2.4e-74	2.4e-74	11.6709	-3.82855	-3.50892	-0.95518	-1.38195	3.88056	5.33182	-3.55803	4.6911	3.84444	3.19803	7.37679	11.6709
																					TC15557	homologue to UP|Q8LLD7_9MAGN (Q8LLD7) Sphingolipid long chain base delta 8 desaturase, partial (52%)	GO:0000004;GO:0016491;GO:0042284;GO:0006629;GO:0008372	At2g46210.1	68415.m05746 delta-8 sphingolipid desaturase, putative similar to delta-8 sphingolipid desaturase GI:3819708 from [Brassica napus]	4.7e-94	4.7e-94	11.6519	-3.6889	2.33731	-3.03224	-3.16181	0.785755	10.8416	-0.895925	3.574	6.0457	6.10554	4.62404	11.6519
																					DT743170	similar to UP|Q19823_CAEEL (Q19823) Spt transcription factor family protein 2, partial (10%)	NA	At5g37390.1	68418.m04498 hypothetical protein contains Pfam profile PF03384: Drosophila protein of unknown function, DUF287	0.43	0.35	11.6434	-4.17184	-0.267996	-0.874426	-2.80568	0.940506	4.96902	-0.673111	3.65734	6.21805	5.12654	5.50102	11.6434
																					TC10405	similar to UP|Q42941_TOBAC (Q42941) Ascorbate peroxidase , partial (95%)	GO:0005737;GO:0016688	At1g07890.1	68414.m00856 L-ascorbate peroxidase 1, cytosolic (APX1) identical to SP|Q05431 L-ascorbate peroxidase, cytosolic (EC 1.11.1.11) (AP) {Arabidopsis thaliana}, L-ascorbate peroxidase [Arabidopsis thaliana] gi|1-TRUNCATED-	1.1e-103	1.1e-103	11.6308	-5.36583	-0.401213	-1.72537	-3.02665	1.25521	8.22254	-1.64855	3.00603	6.92415	6.08523	5.52044	11.6308
																					TC12126	homologue to UP|Q9ZIW4_STRCO (Q9ZIW4) Orf4, partial (5%)	NA	At3g11440.1	68416.m01395 myb family transcription factor (MYB65) contains Pfam profile: PF00249 myb-like DNA-binding domain	1.5e-20	1.5e-20	11.6261	-0.808685	-3.84268	-2.60013	-2.75646	4.55213	4.49577	-4.62467	6.26856	1.93716	1.58013	5.87477	11.6261
[truncated: 826 more rows]

## Sheet: STD
Genes up-regulated in STaminoDia (all: 223, highest absolute D stat: 160)
[truncated: 224 more rows]

[truncated: 8 more sheets: CAR, SEP+PET, SEP+PET+STA, PET+STA, PET+STA+STD, STA+STD, STA+STD+CAR, STA+CAR]
