# Supplementary material for: Within and between Whorls: Comparative Transcriptional Profiling of Aquilegia and Arabidopsis
Source: PLoS One. 2010 Mar 23;5(3):e9735. doi: 10.1371/journal.pone.0009735 (PMC2843724; doi:10.1371/journal.pone.0009735)
Supplement: Table S3 — Differentially expressed genes in stage 12 A. thaliana floral whorls. (1.57 MB XLS) [file pone.0009735.s004.xls]

## Sheet: SEP
Genes down-regulated in SEPals (all: 223, highest absolute D stat: 105)														Genes up-regulated in SEPals (all: 899, highest absolute D stat: 749)
gene	bpstart	bpend	strand	synonym	annotation	SEP	PET	STA	CAR	SEP+PET	PET+STA	d stat test		gene	bpstart	bpend	strand	synonym	annotation	SEP	PET	STA	CAR	SEP+PET	PET+STA	d stat test
At4g02290	1002446	1005202	Complement	T2H3.5	glycosyl hydrolase family 9protein	-11.4791	3.09271	2.18221	1.67346	-3.47868	5.02919	11.4791		At4g25100	12884167	12886770	Complement	F13M23.240	superoxide dismutase [Fe]chloroplast (SODB) / iron superoxide dismutase (FSD1)	16.2637	-3.25994	-1.84167	-1.61354	3.15504	-5.00497	16.2637
At5g39320	15760019	15762171	sense	K3K3.170	UDP-glucose 6-dehydrogenaseputative	-7.60559	2.25239	2.83803	0.609702	-2.99045	4.8768	7.60559		At3g62380	23094584	23095827	Complement	T12C14.80	hypothetical protein	14.5927	-2.02265	-4.01256	-2.08141	5.76971	-5.71032	14.5927
At3g17790	6089628	6091999	sense	MEB5.10	acid phosphatase type 5 (ACP5)	-7.22718	0.581991	3.38117	1.57152	-4.64704	3.45145	7.22718		At1g05680	1703091	1704688	Complement	F3F20.13	UDP-glucoronosyl/UDP-glucosyltransferase family protein	14.4148	-2.85369	-3.49764	-1.39269	4.44239	-6.31906	14.4148
At3g04290	1133331	1136297	Complement	T6K12.9	GDSL-motif lipase/hydrolasefamily protein	-7.10416	5.03631	-1.06907	2.18815	-0.932305	3.04463	7.10416		At2g25510	10863505	10864234	sense	F13B15.17	expressed protein	14.2238	-1.74501	-3.3742	-2.95885	6.15771	-4.70314	14.2238
At1g50010	18521282	18523668	sense	F2J10.11	tubulin alpha-2/alpha-4 chain(TUA2)	-6.76969	1.6702	1.49615	1.94306	-3.1058	2.85216	6.76969		At2g21220	9096407	9096894	sense	F7O24.6	auxin-responsive proteinputative	13.354	-1.55264	-3.11306	-3.05082	6.0286	-4.25347	13.354
At2g35120	14812718	14814415	Complement	T4C15.21	glycine cleavage system Hprotein mitochondrial putative	-6.55001	1.14901	2.71717	1.00678	-3.36275	3.54359	6.55001		At5g43450	17474359	17476025	Complement	MWF20.16	2-oxoglutarate-dependentdioxygenase putative	12.9398	-2.18303	-2.67372	-2.57499	4.95144	-4.52322	12.9398
At1g48480	17922059	17924653	sense	T1N15.9	leucine-rich repeat transmembraneprotein kinase putative	-6.44209	3.93717	0.584801	0.959574	-1.3369	3.97948	6.44209		At5g14740	4757975	4762591	sense	T9L3.40	carbonic anhydrase 2 / carbonatedehydratase 2 (CA2) (CA18)	12.578	-1.92982	-2.95402	-2.39764	5.09773	-4.55619	12.578
At5g20740	7025688	7026534	Complement	T1M15.140	invertase/pectin methylesteraseinhibitor family protein	-6.33322	3.42636	-0.170095	2.14709	-1.68825	2.76139	6.33322		At5g24150	8172369	8175434	Complement	MLE8.1	squalene monooxygenase 11 /squalene epoxidase 11 (SQP11)	12.2567	-2.66207	-1.06412	-3.00377	3.66926	-3.36301	12.2567
At1g56580	21201924	21202621	Complement	F25P12.97	expressed protein	-6.20214	-0.00473144	2.0281	2.97168	-4.86574	1.70762	6.20214		At2g43820	18159304	18160985	sense	F18O19.7	UDP-glucoronosyl/UDP-glucosyltransferase family protein	11.94	-2.55298	-1.60628	-2.73589	3.98296	-3.81629	11.94
At5g51950	21123171	21125831	Complement	MSG15.3	glucose-methanol-choline (GMC)oxidoreductase family protein	-6.11323	3.0448	1.91221	0.223505	-1.82895	4.65806	6.11323		At1g05560	1645497	1647146	Complement	T25N20.21	UDP-glucose transferase(UGT75B2)	11.9204	-2.76313	-2.27295	-1.91393	3.82112	-4.76997	11.9204
At2g34870	14717856	14718532	sense	F19I3.10	hydroxyproline-rich glycoproteinfamily protein	-5.68662	3.90731	-1.88002	3.17547	-1.01576	1.55485	5.68662		At5g22300	7379221	7381928	sense	T6G21.6	nitrilase 4 (NIT4)	11.8426	-2.59201	-1.28791	-3.33346	4.18884	-3.49704	11.8426
At1g80280	30188433	30191478	Complement	F5I6.3	hydrolase alpha/beta fold familyprotein	-5.61733	-0.216211	2.35172	2.6577	-4.82619	1.77687	5.61733		At4g26530	13391511	13393114	sense	M3E9.40	fructose-bisphosphate aldolaseputative	11.5806	-1.9846	-3.04328	-2.30962	5.01883	-4.66034	11.5806
At1g16705	5712081	5713742	sense	F17F16.9	p300/CBPacetyltransferase-related protein-related	-5.56587	3.8202	0.962772	-0.00328898	-0.815229	4.42096	5.56587		At1g14150	4839850	4840748	sense	F7A19.23	oxygen evolving enhancer 3(PsbQ) family protein	11.3585	-2.20831	-3.37135	-1.58915	4.53725	-5.30458	11.3585
At1g73620	27685069	27686790	sense	F25P22.3	thaumatin-like protein putative/ pathogenesis-related protein putative	-5.53881	2.24255	-0.709108	3.36787	-2.17157	1.3017	5.53881		At3g28220	10525641	10527965	sense	T19D11.1	meprin and TRAF homologydomain-containing protein / MATH domain-containingprotein	11.2159	-2.86517	-2.18995	-2.14573	3.94553	-4.7222	11.2159
At1g03170	769632	770684	sense	F15K9.22	expressed protein	-5.53247	0.413338	1.19649	3.20852	-3.98715	1.38778	5.53247		At2g41090	17142862	17143930	sense	T3K9.14	calmodulin-like calcium-bindingprotein 22 kDa (CaBP-22)	11.205	-2.31044	-1.73555	-2.92556	4.29159	-3.68674	11.205
At5g65020	25991047	25992952	sense	MXK3.27	annexin 2 (ANN2)	-5.50366	1.36507	1.39572	1.90049	-2.93791	2.44385	5.50366		At4g17340	9699265	9700421	sense	FCAALL.412	major intrinsic family protein/ MIP family protein	10.9569	-2.16609	-2.50898	-2.31881	4.4735	-4.32502	10.9569
At5g49460	20071855	20075690	sense	K7J8.14	ATP-citrate synthase putative /ATP-citrate (pro-S-)-lyase putative / citrate cleavageenzyme putative	-5.501	2.67889	1.86401	0.136704	-1.70223	4.27522	5.501		At5g58770	23751602	23752860	sense	MZN1.21	dehydrodolichyl diphosphatesynthase putative / DEDOL-PP synthase putative	10.8466	-2.45117	-1.46438	-3.00896	4.06354	-3.54014	10.8466
At1g75780	28454802	28457301	Complement	T4O12.1	tubulin beta-1 chain (TUB1)	-5.42496	-0.523616	5.40377	0.578429	-5.14098	3.73649	5.42496		At3g14630	4917505	4919416	sense	MIE1.13	cytochrome P450 putative	10.701	-2.25148	-2.78631	-1.66018	4.06875	-4.77063	10.701
At2g45190	18635339	18637786	Complement	F4L23.30	axial regulator YABBY1 (YABBY1)/ abnormal floral organs protein (AFO) / filamentousflower protein (FIL)	-5.38933	0.491225	1.02071	2.90387	-3.58886	1.31128	5.38933		At1g23130	8200372	8201223	sense	T26J12.10	Bet v I allergen familyprotein	10.6072	-1.21186	-2.27298	-2.99266	5.11458	-3.13089	10.6072
At3g11160	3496073	3497169	Complement	F9F8.28	expressed protein	-5.37791	4.29424	1.1073	-0.55177	-0.460338	5.17967	5.37791		At3g22340	7897491	7898405	sense	MCB17.7	copia-like retrotransposon familyhas a 4.2e-60 P-value blast match to GB:AAC02666polyprotein (Ty1_Copia-element) [Arabidopsis thaliana]	10.5001	-2.74537	-0.633273	-3.7312	3.82075	-2.97244	10.5001
At1g24020	8500466	8501504	Complement	T23E23.28	Bet v I allergen familyprotein	-5.3292	3.26616	0.0446345	1.28208	-1.1425	2.82732	5.3292		At1g59870	22038171	22043703	sense	F23H11.19	ABC transporter family protein	10.3641	-2.64121	-2.57828	-1.44692	3.62984	-4.99101	10.3641
At1g04680	1303528	1307881	Complement	T1G11.7	pectate lyase family protein	-5.02018	4.49869	-2.2212	2.53073	-0.259834	1.63012	5.02018		At3g03480	828303	829903	Complement	T21P5.10	transferase family protein	10.3385	-1.75086	-2.40132	-2.43869	4.52214	-3.78858	10.3385
At1g10850	3611749	3614633	sense	T16B5.1	pseudogene leucine-rich repeattransmembrane protein kinase putativelikely BAC sequence errors result in a frameshiftpreventing the accurate annotation of this gene.	-4.95613	4.6702	-1.18046	1.31195	-0.123784	2.66054	4.95613		At3g57230	21188689	21191911	sense	F28O9.80	MADS-box protein (AGL16)	10.2919	-2.22667	-2.24988	-2.54895	4.42216	-4.10094	10.2919
At5g15230	4944906	4946219	sense	F8M21.120	gibberellin-regulated protein 4(GASA4) / gibberellin-responsive protein 4	-4.88513	4.47639	0.522822	-0.318566	-0.169438	4.3996	4.88513		At3g01290	88064	89429	Complement	T4P13.3	band 7 family protein	10.234	-1.80628	-1.9861	-2.25401	3.96099	-3.49148	10.234
At1g04820	1356190	1358374	Complement	F13M7.19	tubulin alpha-2/alpha-4 chain(TUA4)	-4.86388	3.03339	-1.04698	2.36093	-1.07182	1.59634	4.86388		At4g23600	12310629	12313222	sense	F9D16.70	coronatine-responsive tyrosineaminotransferase / tyrosine transaminase	10.1459	-4.73709	-0.56734	-1.55645	1.85236	-4.65709	10.1459
At1g67750	25405251	25407151	sense	F12A21.12	pectate lyase family protein	-4.81172	0.897065	-0.757884	4.56729	-2.97111	0.130767	4.81172		At4g35090	16700637	16703292	Complement	M4E13.140	catalase 2	10.1226	-3.18993	-0.273658	-3.19751	2.98925	-3.00201	10.1226
At1g48300	17851024	17852466	sense	F11A17.15	expressed protein	-4.79397	0.190187	3.92938	0.45192	-3.76444	3.48048	4.79397		At1g65490	24358434	24358975	sense	F5I14.26	expressed protein	10.1041	-2.55454	-2.67269	-1.29728	3.57531	-5.03675	10.1041
At5g23970	8096293	8097657	sense	MZF18.15	transferase family protein	-4.78814	4.20046	-2.16111	2.56439	-0.335327	1.53294	4.78814		At1g07180	2204319	2206916	sense	F10K1.11	pyridine nucleotide-disulphideoxidoreductase family protein	10.0367	-1.32499	-2.89382	-2.36918	5.01291	-3.81532	10.0367
At2g17370	7556857	7559283	sense	F5J6.1	3-hydroxy-3-methylglutaryl-CoAreductase 2 / HMG-CoA reductase 2 (HMGR2)	-4.74172	-0.423488	3.33789	1.50859	-4.44333	2.37328	4.74172		At2g18660	8097740	8098738	Complement	MSF3.4	expansin family protein (EXPR3)	9.98291	-1.98009	-2.02986	-2.21446	3.94239	-3.70529	9.98291
At4g28680	14155254	14158676	sense	T5F17.130	tyrosine decarboxylaseputative	-4.69125	-0.541162	2.35838	2.47573	-4.55448	1.49238	4.69125		At3g28700	10760802	10763351	sense	MZN14.19	expressed protein	9.95913	-3.08709	-0.181219	-3.62494	3.25368	-2.82303	9.95913
At1g75390	28295426	28296669	sense	F1B16.8	bZIP transcription factor familyprotein	-4.64362	0.628652	3.8252	-0.0251234	-3.15114	3.88115	4.64362		At1g20070	6958001	6959114	Complement	T20H2.15	expressed protein	9.93535	-2.73174	-0.351253	-3.61472	3.42303	-2.68653	9.93535
At3g48350	17916717	17918546	sense	T29H11.130	cysteine proteinase putative	-4.59321	-0.542178	1.4673	3.28126	-4.48493	0.756899	4.59321		At5g62730	25214720	25217259	sense	MQB2.30	proton-dependent oligopeptidetransport (POT) family protein	9.86232	0.807003	-4.81033	-3.47737	9.18298	-3.13437	9.86232
At3g19790	6874943	6875446	Complement	MMB12.25	hypothetical protein	-4.5791	3.52473	-2.01513	2.83821	-0.659204	1.18089	4.5791		At1g31580	11311154	11311970	sense	F27M3.20	expressed protein	9.76313	-2.59913	-4.33091	0.0594776	3.52885	-7.28637	9.76313
At5g47060	19134034	19135273	sense	MQD22.20	senescence-associatedprotein-related	-4.56646	-0.185635	2.27989	2.02155	-3.99384	1.74742	4.56646		At5g57785	23426122	23426648	Complement	MRI1.15	expressed protein	9.7066	-2.18398	-3.30537	-1.3693	4.21528	-5.17998	9.7066
At4g31290	15185997	15188490	sense	F8F16.110	ChaC-like family protein	-4.52403	0.0933248	3.24699	0.723816	-3.53959	2.79015	4.52403		At1g21250	7439255	7442082	sense	F16F4.6	wall-associated kinase 1 (WAK1)	9.68887	-2.09456	-3.01115	-1.67441	4.27118	-4.76408	9.68887
At2g35190	14837705	14840398	sense	T4C15.14	novel plant SNARE 11 (NPSN11)	-4.49478	0.586358	3.40937	0.186279	-3.02128	3.4765	4.49478		At2g14560	6221054	6222983	sense	T13P21.6	expressed protein	9.60038	-2.03277	-2.03996	-2.16774	3.87861	-3.7522	9.60038
At5g40610	16282090	16284520	Complement	MNF13.130	glycerol-3-phosphatedehydrogenase [NAD+] / GPDH	-4.48262	1.07248	3.56818	-0.425166	-2.51525	4.2337	4.48262		At4g24120	12524604	12527351	sense	T19F6.110	transporter putative	9.5741	-2.39213	-3.14392	-1.00928	3.69033	-5.3485	9.5741
At3g46200	16980251	16982189	sense	F12M12.170	MutT/nudix family protein	-4.42479	2.61021	0.412993	0.968898	-1.19493	2.64516	4.42479		At4g14365	8271460	8273733	Complement	FCAALL.197	zinc finger (C3HC4-type RINGfinger) family protein / ankyrin repeat family protein	9.53504	-1.75099	-1.8003	-2.29194	3.82067	-3.25812	9.53504
At3g23350	8354111	8355208	sense	MLM24.8	expressed protein	-4.41734	1.27046	2.37845	0.399087	-2.39267	3.26372	4.41734		At3g14660	4924784	4927441	sense	MIE1.16	cytochrome P450 putative	9.51963	-2.08252	-1.39937	-2.95113	3.95723	-3.13105	9.51963
At3g16010	5434020	5436270	sense	MSL1.5	pentatricopeptide (PPR)repeat-containing protein	-4.41282	2.8974	-1.47699	2.70501	-0.993569	1.15832	4.41282		At2g47880	19612110	19612732	sense	T9J23.13	glutaredoxin family protein	9.47036	-1.97964	-2.14627	-2.51658	4.29284	-3.7521	9.47036
At4g27180	13614866	13619162	Complement	T24A18.130	kinesin-like protein B (KATB)	-4.40621	2.89616	-0.154658	1.14962	-0.853899	2.31158	4.40621		At3g11290	3535616	3537849	Complement	F11B9.20	expressed protein	9.4278	-2.06178	-2.16031	-2.39219	4.17852	-3.85196	9.4278
At4g16515	9305278	9305786	Complement	FCAALL.224	expressed protein	-4.40473	3.18519	0.777346	0.111694	-0.75952	3.53487	4.40473		At3g01500	194740	197981	Complement	F4P13.5	carbonic anhydrase 1 chloroplast/ carbonate dehydratase 1 (CA1)	9.40252	0.457909	-8.20918	-0.917285	8.04894	-5.69708	9.40252
At1g52410	19524403	19529293	sense	F19K6.14	caldesmon-related	-4.39667	-0.555225	0.563357	4.39177	-4.31456	-0.0013359	4.39667		At4g00780	334733	336310	sense	T18A10.3	meprin and TRAF homologydomain-containing protein / MATH domain-containingprotein	9.26375	-0.276674	-2.99126	-3.45432	6.4556	-2.79443	9.26375
At2g21130	9062479	9063313	Complement	F26H11.11	peptidyl-prolyl cis-transisomerase / cyclophilin (CYP2) / rotamase	-4.38566	0.204787	4.37061	-0.160818	-3.44599	3.8494	4.38566		At2g31880	13561973	13564054	sense	F20M17.8	leucine-rich repeattransmembrane protein kinase putative	9.24242	-1.5458	-4.66962	-0.743555	4.73115	-5.79951	9.24242
At4g34200	16373850	16376626	Complement	F28A23.40	D-3-phosphoglyceratedehydrogenase putative / 3-PGDH putative	-4.36436	2.58411	0.262119	1.0778	-1.15646	2.47633	4.36436		At1g09500	3066701	3068600	sense	F14J9.16	cinnamyl-alcohol dehydrogenasefamily / CAD family	9.22712	-2.05232	-2.28963	-2.10222	4.0195	-3.98471	9.22712
At4g14960	8548488	8550426	Complement	FCAALL.199	tubulin alpha-6 chain (TUA6)	-4.34218	2.9058	-0.91861	2.02066	-0.923733	1.64124	4.34218		At4g33010	15926673	15931335	Complement	F26P21.130	glycine dehydrogenase[decarboxylating] putative / glycine decarboxylaseputative / glycine cleavage system P-protein putative	9.21227	-2.72291	-2.29285	-1.14511	3.06243	-4.81794	9.21227
At5g47020	19099232	19107244	sense	MQD22.16	glycine-rich protein	-4.31418	2.29636	-0.932386	2.46742	-1.23584	1.12466	4.31418		At3g48710	18051962	18055173	sense	T8P19.220	expressed protein	9.1804	-3.46617	0.749313	-3.90373	2.51535	-2.20912	9.1804
At1g56720	21267085	21270033	Complement	F25P12.84	protein kinase family protein	-4.27026	2.74157	0.362302	0.644738	-0.870558	2.71745	4.27026		At1g51805	19224646	19229358	Complement	F19C24.2	leucine-rich repeat proteinkinase putative	9.10315	-2.64828	-2.92669	-0.44603	2.91273	-5.65131	9.10315
At5g66330	26517628	26519181	Complement	K1L20.11	leucine-rich repeat familyprotein	-4.26216	1.71901	-0.245686	2.34685	-1.77373	1.27154	4.26216		At5g52570	21351630	21354206	Complement	F6N7.5	beta-carotene hydroxylaseputative	9.04877	-1.14906	-1.45081	-2.60852	3.88238	-2.3416	9.04877
At1g60810	22392223	22394830	Complement	F8A5.32	ATP citrate-lyase -related	-4.23803	3.39326	-0.237054	0.820738	-0.503739	2.64045	4.23803		At2g41640	17367574	17369613	sense	T32G6.16	expressed protein	9.04098	-1.90032	-2.38531	-1.97772	3.99862	-3.93383	9.04098
At3g54220	20081136	20083758	sense	F24B22.180	scarecrow transcriptionfactor putative	-4.14805	2.05043	0.785617	0.768448	-1.34799	2.5351	4.14805		At3g50420	18721852	18724630	Complement	T20E23.20	pentatricopeptide (PPR)repeat-containing protein	9.03342	-1.91771	-2.19339	-2.34861	4.17102	-3.73871	9.03342
At5g04160	1142783	1144913	Complement	F21E1.80	phosphate translocator-related	-4.1428	0.672806	2.66884	0.431205	-2.67339	2.93703	4.1428		At3g60390	22331570	22333561	Complement	T8B10.50	homeobox-leucine zipper protein3 (HAT3) / HD-ZIP protein 3	8.95147	-2.12536	-2.0526	-2.04104	3.73376	-3.83936	8.95147
At1g26570	9182191	9184380	sense	T1K7.6	UDP-glucose 6-dehydrogenaseputative	-4.10114	-0.414855	2.68652	1.57766	-3.90169	1.86419	4.10114		At2g36145	15175620	15176585	sense	F9C22.7	expressed protein	8.92742	-0.106675	-4.12165	-2.14304	6.31722	-3.5267	8.92742
At1g12000	4049894	4053833	Complement	F12F1.13	pyrophosphate--fructose-6-phosphate 1-phosphotransferasebeta subunit putative / pyrophosphate-dependent6-phosphofructose-1-kinase putative	-4.06774	3.78919	-1.27254	1.4368	-0.149905	1.974	4.06774		At1g72900	27435226	27437443	sense	F3N23.10	disease resistance protein(TIR-NBS class) putative	8.89081	-2.13281	-2.21306	-1.82517	3.68466	-4.02914	8.89081
At4g03110	1376306	1379402	Complement	T4I9.1	RNA-binding protein putative	-4.06456	-0.0342879	3.70082	0.332599	-3.42983	3.03441	4.06456		At2g14610	6248786	6249545	Complement	T6B13.15	pathogenesis-related protein 1(PR-1)	8.88311	-2.07719	-2.22583	-1.89898	3.76216	-3.969	8.88311
At5g06050	1820135	1823771	sense	K18J17.25	dehydration-responsiveprotein-related	-4.04139	0.549387	1.08516	1.96803	-2.72465	1.41536	4.04139		At5g09660	2993446	2995676	Complement	F17I14.150	malate dehydrogenaseglyoxysomal	8.86836	-1.43039	-5.34132	-0.167861	4.56831	-6.40711	8.86836
At2g22900	9751305	9753372	Complement	T20K9.11	galactosyl transferaseGMA12/MNN10 family protein	-4.0333	1.96644	0.403972	1.27235	-1.45295	2.07352	4.0333		At1g37130	14160968	14164379	sense	F28L22.2	nitrate reductase 2 (NR2)	8.86429	-3.13207	-2.66705	-0.675903	2.91454	-5.65376	8.86429
At4g34990	16661334	16662372	Complement	F11I11.9	myb family transcription factor(MYB32)	-4.03007	0.832805	2.3015	0.539289	-2.46745	2.77159	4.03007		At1g27040	9386771	9390029	Complement	T7N9.10	nitrate transporter putative	8.85703	-1.74498	-2.19716	-2.27857	4.12335	-3.57866	8.85703
At5g24580	8410261	8412268	Complement	K18P6.11	copper-binding family protein	-3.99937	-0.33794	3.00882	1.17194	-3.73033	2.20842	3.99937		At2g05380	1966817	1968033	sense	F16J10.7	glycine-rich protein (GRP3S)	8.84253	-2.30982	-2.75529	-0.5171	2.86762	-5.18976	8.84253
At3g03150	727561	729467	Complement	T17B22.16	expressed protein	-3.93492	2.13965	0.594524	0.850546	-1.24998	2.40828	3.93492		At5g58310	23591706	23593310	Complement	MCK7.18	hydrolase alpha/beta fold familyprotein	8.80255	-1.99423	-1.85789	-2.15135	3.67144	-3.5255	8.80255
At5g57330	23235440	23238315	sense	MJB24.14	aldose 1-epimerase familyprotein	-3.92867	1.2436	2.50738	-0.124038	-1.98336	3.40876	3.92867		At2g04039	1333268	1334563	sense	F3L12.11	expressed protein	8.79112	-0.584613	-4.40996	-1.33537	5.39684	-4.34721	8.79112
At1g29310	10252292	10254676	sense	F28N24.2	protein transport protein sec61putative	-3.87085	-0.403658	3.69744	0.565122	-3.69714	2.64239	3.87085		At5g04140	1129853	1138443	sense	F21E1.60	glutamate synthase (GLU1) /ferredoxin-dependent glutamate synthase (Fd-GOGAT 1)	8.69805	-0.98743	-4.56032	-0.912538	4.9061	-5.01983	8.69805
At3g05020	1391658	1392960	Complement	T9J14.3	acyl carrier protein 1chloroplast (ACP-1)	-3.86355	3.81406	-0.0530243	0.0669716	-0.0124485	3.1372	3.86355		At1g75460	28331547	28333425	sense	F1B16.1	ATP-dependent protease La (LON)domain-containing protein	8.68361	-0.129869	-3.30006	-3.00307	6.32721	-2.89911	8.68361
At1g79820	30026935	30032270	Complement	F20B17.24	hexose transporter putative	-3.84885	0.844187	1.36255	1.22943	-2.29225	1.93603	3.84885		At1g64360	23891533	23892167	sense	F15H21.8	expressed protein	8.68331	-1.82139	-1.85455	-2.32949	3.83956	-3.3352	8.68331
At1g31830	11418606	11420818	Complement	F5M6.16	amino acid permease familyprotein	-3.84279	-0.121153	1.40531	2.26864	-3.33535	1.07929	3.84279		At1g55450	20708593	20710556	Complement	T5A14.14	embryo-abundant protein-related	8.5964	-2.18732	-2.17869	-1.58112	3.40465	-4.07294	8.5964
At1g74310	27939597	27943851	Complement	F1O17.2	heat shock protein 101 (HSP101)	-3.83182	2.74989	-0.987469	1.86965	-0.743278	1.461	3.83182		At3g47180	17383785	17384438	Complement	F13I12.230	zinc finger (C3HC4-type RINGfinger) family protein	8.57883	-1.27585	-3.48736	-1.50068	4.58694	-4.32975	8.57883
At2g14890	6406703	6408082	sense	T26I20.5	arabinogalactan-protein (AGP9)	-3.79534	1.85518	-0.492685	2.16233	-1.40507	1.16541	3.79534		At2g24850	10589909	10592295	Complement	F27C12.23	aminotransferase putative	8.565	-1.885	-1.66846	-2.19843	3.56071	-3.25047	8.565
At2g45970	18919333	18921812	Complement	F4I18.5	cytochrome P450 putative	-3.78096	2.75543	-2.40393	3.3117	-0.683504	0.305092	3.78096		At1g71030	26798785	26800026	Complement	F23N20.2	myb family transcription factor	8.56491	-1.97377	-2.4941	-1.60999	3.72753	-4.14282	8.56491
At1g08830	2827089	2829260	sense	F22O13.32	superoxide dismutase [Cu-Zn](SODCC) / copper/zinc superoxide dismutase (CSD1)	-3.76717	2.05058	-0.122118	1.43186	-1.1202	1.65101	3.76717		At2g29290	12593575	12594804	sense	F16P2.33	tropinone reductase putative /tropine dehydrogenase putative	8.54691	-1.73027	-2.42132	-1.7989	3.88214	-3.82198	8.54691
At1g14670	5037607	5040523	sense	T5E21.15	endomembrane protein 70putative	-3.75873	1.59694	1.4401	0.356781	-1.53816	2.73522	3.75873		At2g43570	18083301	18084539	Complement	T1O24.39	chitinase putative	8.54513	-1.95419	-1.92519	-2.15138	3.72221	-3.53652	8.54513
At1g77460	29109442	29116474	sense	T5M16.5	C2 domain-containing protein /armadillo/beta-catenin repeat family protein	-3.74542	-0.117284	3.37969	0.412018	-3.24663	2.66476	3.74542		At5g49480	20087969	20088864	sense	K7J8.1	sodium-inducible calcium-bindingprotein (ACP1) / sodium-responsive calcium-binding protein(ACP1)	8.52566	-2.61821	-0.302089	-3.53542	3.30378	-2.54034	8.52566
At4g31340	15205486	15209600	sense	F8F16.160	myosin heavy chain-related	-3.74434	2.04061	0.730817	0.550116	-1.1049	2.47602	3.74434		At1g68010	25497016	25499651	sense	T23K23.14	glycerate dehydrogenase /NADH-dependent hydroxypyruvate reductase	8.49893	-1.03166	-5.29412	-0.383478	4.79546	-5.7504	8.49893
At5g13460	4315870	4318363	sense	T22N19.110	calmodulin-binding familyprotein	-3.73914	3.29217	-1.59191	1.90164	-0.269562	1.34475	3.73914		At3g50740	18866142	18867865	Complement	T3A5.120	UDP-glucoronosyl/UDP-glucosyltransferase family protein	8.47637	-2.37399	-2.30175	-1.55578	3.46181	-4.33986	8.47637
At3g02790	604852	605428	sense	F13E7.27	zinc finger (C2H2 type) familyprotein	-3.69371	1.85175	-0.914857	2.5727	-1.37215	0.804046	3.69371		At1g19150	6612740	6613963	sense	T29M8.2	chlorophyll A-B binding proteinputative / LHCI type II putative	8.46281	-1.04841	-5.01092	-0.516569	4.74503	-5.51221	8.46281
At1g26450	9148697	9150237	Complement	T1K7.18	beta-13-glucanase-related	-3.68836	3.18294	0.769312	-0.405301	-0.30276	3.54413	3.68836		At3g49750	18461418	18462479	Complement	T16K5.100	leucine-rich repeat familyprotein	8.46021	-3.28559	-0.152425	-2.88177	2.60372	-2.96141	8.46021
At5g22940	7676941	7679182	sense	MRN17.17	exostosin family protein	-3.67472	1.95664	0.484637	0.966968	-1.25515	2.13801	3.67472		At1g55850	20880365	20883146	sense	F14J16.9	cellulose synthase familyprotein	8.44918	-1.51968	-4.76504	-0.340077	4.32428	-5.91672	8.44918
At1g64650	24027161	24030058	Complement	F1N19.22	expressed protein	-3.67442	0.506212	1.32586	1.55113	-2.551	1.58497	3.67442		At1g15980	5489292	5491303	sense	T24D18.8	expressed protein	8.42792	-1.16427	-3.84262	-1.27421	4.67258	-4.54615	8.42792
At5g23530	7932969	7934439	Complement	MQM1.21	expressed protein	-3.67301	3.07801	-2.90916	3.42408	-0.397945	0.167491	3.67301		At3g15790	5343216	5344707	sense	MSJ11.19	methyl-CpG-bindingdomain-containing protein	8.41426	-1.98433	-2.79179	-1.21264	3.61257	-4.51249	8.41426
At2g28840	12385436	12387819	sense	F8N16.13	ankyrin repeat family protein	-3.66264	-0.107597	1.91008	1.62285	-3.19062	1.51971	3.66264		At1g67860	25448468	25448926	Complement	T23K23.29	expressed protein	8.40156	-2.20023	-1.93269	-1.9572	3.51444	-3.78079	8.40156
At5g26850	9445443	9450822	sense	F2P16.24	expressed protein	-3.62921	3.18117	-2.97358	3.33763	-0.278946	0.189026	3.62921		At1g64770	24061102	24063224	sense	F13O11.8	expressed protein	8.38158	-2.14027	-3.46574	-0.718306	3.65259	-5.34462	8.38158
At2g42570	17724453	17727158	Complement	F14N22.16	expressed protein	-3.6148	3.61252	-2.28781	2.22481	0.0241645	0.996658	3.6148		At5g52810	21416557	21417829	sense	F6N7.8	ornithinecyclodeaminase/mu-crystallin family protein	8.34317	-2.13893	-1.69832	-2.13732	3.47327	-3.49262	8.34317
At1g69040	25961482	25963970	sense	F4N2.2	ACT domain containing protein(ACR4)	-3.5773	3.23065	0.554497	-0.297499	-0.215478	3.33157	3.5773		At4g23180	12138148	12140932	sense	F21P8.70	receptor-like protein kinase 4putative (RLK4)	8.31327	-1.84428	-3.9637	-0.352759	3.67921	-5.64405	8.31327
At4g15910	9028672	9029283	sense	FCAALL.235	drought-responsive protein /drought-induced protein (Di21)	-3.57168	1.56396	-1.06857	2.94105	-1.50978	0.431555	3.57168		At1g06460	1966834	1969535	Complement	F12K11.19	31.2 kDa small heat shockfamily protein / hsp20 family protein	8.29291	-0.665503	-1.76504	-3.65842	5.14518	-2.11416	8.29291
At3g30730	12359875	12360078	Complement	T4A2.2	hypothetical protein	-3.57033	0.345608	1.8314	1.12449	-2.62692	1.87666	3.57033		At1g70760	26690892	26692550	sense	F15H11.1	inorganic carbon transportprotein-related	8.28372	-1.12798	-3.26206	-1.32207	4.25556	-4.02045	8.28372
At3g08740	2654647	2656242	Complement	F17O14.21	elongation factor P (EF-P)family protein	-3.5334	2.76827	-2.76204	3.44662	-0.494621	0.0508898	3.5334		At1g64370	23892583	23893324	sense	F15H21.1	expressed protein	8.26298	0.681462	-2.43658	-4.8874	7.68811	-1.4401	8.26298
At5g55730	22575374	22577687	Complement	MDF20.17	fasciclin-likearabinogalactan-protein (FLA1)	-3.53148	2.52022	-1.61428	2.49093	-0.716971	0.755509	3.53148		At1g35710	13222152	13225893	sense	F14D7.1	leucine-rich repeat transmembraneprotein kinase putative	8.22777	-1.68322	-2.01664	-1.99451	3.68903	-3.3757	8.22777
At2g32120	13658587	13660998	Complement	F22D22.13	heat shock protein 70 familyprotein / HSP70 family protein	-3.48604	2.63075	-0.998302	1.6994	-0.595977	1.36101	3.48604		At3g63110	23329051	23330515	Complement	T20O10.210	adenylateisopentenyltransferase 3 / cytokinin synthase (IPT3)	8.18605	-0.817863	-5.89461	-0.237273	5.0687	-5.92173	8.18605
At1g06550	2003653	2006563	Complement	F12K11.12	enoyl-CoA hydratase/isomerasefamily protein	-3.47101	2.86749	-1.04678	1.49438	-0.379563	1.45937	3.47101		At1g65480	24335091	24337597	sense	F5I14.3	flowering locus T protein (FT)	8.12454	-2.03333	-2.26005	-1.72619	3.60153	-3.94106	8.12454
At3g25850	9459415	9460191	Complement	K9I22.1	DC1 domain-containing protein	-3.46483	2.98804	0.706895	-0.342631	-0.30457	3.28417	3.46483		At5g67370	26894794	26896768	Complement	K8K14.9	expressed protein	8.1068	-1.43356	-2.14478	-2.33822	4.15179	-3.21709	8.1068
At5g58190	23563555	23566831	sense	MCK7.6	expressed protein	-3.42386	-0.0788995	3.40737	0.124255	-2.93103	2.70071	3.42386		At2g25450	10836995	10838733	Complement	F13B15.11	2-oxoglutarate-dependentdioxygenase putative	8.09646	-4.24634	1.71431	-4.22141	1.9219	-1.95876	8.09646
At4g39860	18499838	18501636	sense	T5J17.30	expressed protein	-3.42252	1.07849	-0.487581	2.66617	-1.80677	0.516744	3.42252		At1g54040	20174383	20177617	Complement	F15I1.12	kelch repeat-containing protein	8.08799	-1.44267	-5.20387	-0.0639952	4.34241	-6.20262	8.08799
At4g17190	9648552	9650923	Complement	FCAALL.91	farnesyl pyrophosphatesynthetase 2 (FPS2) / FPP synthetase 2 / farnesyldiphosphate synthase 2	-3.42075	1.67129	0.00708134	1.46299	-1.26364	1.45117	3.42075		At4g16740	9407790	9410899	sense	FCAALL.18	terpene synthase/cyclase familyprotein	8.01599	-1.64422	-2.02333	-2.08865	3.77129	-3.32424	8.01599
At1g32190	11592935	11595962	Complement	F3C3.3	expressed protein	-3.41689	2.73493	-2.45863	3.0472	-0.461967	0.252904	3.41689		At3g61860	22911047	22913309	Complement	F21F14.30	arginine/serine-rich splicingfactor RSP31 (RSP31)	8.00798	-2.35105	-2.17538	-1.22073	3.02397	-4.24881	8.00798
At3g06650	2079039	2083246	Complement	F5E6.2	ATP-citrate synthase putative /ATP-citrate (pro-S-)-lyase putative / citrate cleavageenzyme putative	-3.38397	1.85592	0.869824	0.336287	-1.03874	2.44936	3.38397		At5g38980	15624001	15624579	sense	K15E6.160	expressed protein	8.00623	-1.66556	-5.74611	0.633658	3.84884	-7.37777	8.00623
At2g27510	11765157	11766554	Complement	F10A12.19	ferredoxin putative	-3.37239	2.83003	-0.515517	0.931337	-0.36145	1.94635	3.37239		At3g44410	16066038	16066757	Complement	T22K7.90	pseudogene disease resistenceprotein putativesimilar to disease resistance protein RPP1-WsB[Arabidopsis thaliana] gi|3860165|gb|AAC72978	8.00516	-1.66547	-2.40025	-1.76772	3.79998	-3.70766	8.00516
At4g16500	9301413	9302045	Complement	FCAALL.171	cysteine protease inhibitorfamily protein / cystatin family protein	-3.36425	1.54963	0.500997	1.10046	-1.38645	1.79261	3.36425		At3g16180	5481331	5485100	Complement	MSL1.22	proton-dependent oligopeptidetransport (POT) family protein	7.9732	-1.84298	-2.88646	-0.868537	3.32581	-4.50089	7.9732
At1g05620	1679165	1681705	sense	F3F20.7	inosine-uridine preferringnucleoside hydrolase family protein	-3.3541	1.6693	1.95779	-0.472536	-1.22131	3.34147	3.3541		At1g01470	172146	172923	Complement	F22L4.3	late embryogenesis abundantprotein putative / LEA protein putative	7.97317	-0.581934	-1.52255	-3.94556	5.15337	-1.82902	7.97317
At1g18840	6500839	6504388	Complement	F6A14.7	calmodulin-binding familyprotein	-3.3466	2.83781	-0.627514	1.0033	-0.326527	1.83307	3.3466		At3g54010	20011867	20016161	sense	F5K20.310	peptidyl-prolyl cis-transisomerase putative / FK506-binding protein putative /pasticcino 1-D (PAS1-D)	7.96919	0.314852	-6.00197	-1.24744	6.72395	-4.43064	7.96919
At4g22756	11954855	11956824	Complement	T12H17.3	sterol desaturase familyprotein	-3.34308	2.18314	0.894306	0.0380575	-0.791973	2.76066	3.34308		At5g44130	17778317	17779230	sense	MLN1.5	fasciclin-likearabinogalactan-protein putative	7.9268	-1.96604	-1.96715	-2.109	3.69089	-3.56254	7.9268
At5g48230	19569241	19572755	Complement	MIF21.12	acetyl-CoA C-acyltransferaseputative / 3-ketoacyl-CoA thiolase putative	-3.29707	2.53451	0.119217	0.454342	-0.494962	2.28604	3.29707		At5g59510	24007300	24007922	sense	F2O15.30	expressed protein	7.8886	-0.746998	-2.09204	-2.94222	4.81199	-2.48881	7.8886
At1g16780	5739292	5743562	Complement	F17F16.2	vacuolar-type H+-translocatinginorganic pyrophosphatase putative	-3.29375	0.777504	1.08013	1.13538	-1.9491	1.62535	3.29375		At3g51890	19260457	19261942	Complement	ATEM1.14	expressed protein	7.88766	-2.2216	-2.09072	-1.07389	2.8307	-4.11284	7.88766
At1g48410	17889766	17896236	Complement	F11A17.3	argonaute protein (AGO1)	-3.27604	-0.237895	0.665465	2.72033	-3.00991	0.360018	3.27604		At5g24530	8378836	8383404	sense	K18P6.6	oxidoreductase 2OG-Fe(II)oxygenase family protein	7.86442	-1.23797	-1.52625	-3.07045	4.22602	-2.44335	7.86442
At1g56700	21259903	21261433	sense	F25P12.86	pyrrolidone-carboxylatepeptidase family protein	-3.2717	1.97765	-0.960335	2.07773	-0.927666	0.863724	3.2717		At4g37930	17831740	17834859	Complement	F20D10.50	glycinehydroxymethyltransferase / serine hydroxymethyltransferase/ serine/threonine aldolase (SHM1)	7.8436	-1.13892	-3.68213	-1.02942	4.24063	-4.39155	7.8436
At2g31390	13390140	13393286	Complement	T28P16.12	pfkB-type carbohydrate kinasefamily protein	-3.2644	-0.136835	3.06267	0.326101	-2.8902	2.41124	3.2644		At4g36500	17225915	17226613	Complement	AP22.75	expressed protein	7.82359	-2.45849	-2.85774	-0.689327	3.08928	-5.06964	7.82359
At4g22770	11963639	11965695	Complement	T12H17.160	DNA-binding family protein	-3.25768	2.74784	0.665568	-0.278675	-0.323836	3.03862	3.25768		At4g33050	15944456	15947026	Complement	F26P21.170	calmodulin-binding familyprotein	7.82191	-2.3463	-2.53258	-0.892937	3.02305	-4.64753	7.82191
At2g22170	9433929	9434891	Complement	T26C19.17	lipid-associated familyprotein	-6.62608	-1.86599	4.30743	3.48175	-9.01756	1.74358	0		At1g73750	27740291	27742740	sense	F25P22.17	expressed protein	7.81007	-2.07471	-1.3404	-1.85776	2.88287	-3.11662	7.81007
At4g32460	15662272	15664983	Complement	F8B4.160	expressed protein	-5.65027	7.20738	-0.326335	-0.447639	0.667323	5.21788	0		At5g67030	26770748	26774462	Complement	K8A10.10	zeaxanthin epoxidase (ZEP)(ABA1)	7.80937	-0.988237	-1.61734	-2.83887	4.21155	-2.31103	7.80937
At3g43930	15771935	15773667	Complement	T15B3.70	expressed protein	-5.59439	-2.05813	4.30646	2.98621	-8.56905	1.52445	0		At1g77120	28980345	28982311	sense	F22K20.19	alcohol dehydrogenase (ADH)	7.79994	-2.50913	-1.90872	-1.33012	2.8804	-4.10911	7.79994
At5g65810	26354895	26356963	Complement	MPA24.3	expressed protein	-5.31719	1.41599	4.67802	-0.975631	-2.79572	5.71103	0		At3g62450	23109120	23109606	sense	T12C14.150	expressed protein	7.77813	-4.48476	0.959007	-2.80448	1.51215	-2.77055	7.77813
At5g59120	23881956	23885275	Complement	K18B18.11	subtilase family protein	-5.31499	-2.76714	10.8023	0.517659	-8.93551	3.79815	0		At2g24820	10582058	10584553	sense	F27C12.26	Rieske [2Fe-2S]domain-containing protein	7.76422	-0.410649	-2.11421	-3.30134	5.22785	-2.1744	7.76422
At3g47230	17403084	17404684	Complement	F13I12.280	expressed protein	-5.16372	0.247395	10.1791	-2.18324	-3.94314	7.80164	0		At5g61010	24571124	24573975	sense	MSL3.1	exocyst subunit EXO70 familyprotein	7.76151	-2.70424	-1.3577	-1.64476	2.65987	-3.70407	7.76151
At5g02550	573052	573556	Complement	T22P11.140	expressed protein	-4.91538	6.33695	-1.33737	0.448053	0.745149	3.57359	0		At1g08930	2873493	2877226	sense	F7G19.19	early-responsive to dehydrationstress protein (ERD6) / sugar transporter family protein	7.75964	-2.09704	-2.08949	-1.05204	2.81108	-3.99004	7.75964
At4g29700	14543463	14545144	Complement	T16L4.210	type Iphosphodiesterase/nucleotide pyrophosphatase familyprotein	-4.8711	-0.330541	-1.00473	7.48249	-4.43135	-1.14904	0		At3g47390	17473079	17475640	sense	T21L8.140	cytidine/deoxycytidylatedeaminase family protein	7.73791	-2.13981	-2.7235	-0.850189	3.15208	-4.62925	7.73791
At1g79360	29858931	29860714	Complement	YUP8H12R.2	transporter-related	-4.81314	-3.18562	4.90767	3.18005	-9.38077	1.06271	0		At5g58260	23578108	23579167	Complement	MCK7.13	expressed protein	7.73073	-1.85507	-3.52576	-0.238916	3.19095	-5.33705	7.73073
At3g02110	370777	373729	Complement	F1C9.10	serine carboxypeptidase S10family protein	-4.80984	5.80168	-1.17042	0.523059	0.540928	3.40227	0		At5g10760	3400343	3402204	Complement	T30N20.30	aspartyl protease familyprotein	7.72557	-1.85222	-1.94628	-2.14006	3.70314	-3.42931	7.72557
At4g37870	17802688	17806530	Complement	T28I19.150	phosphoenolpyruvatecarboxykinase [ATP] putative / PEP carboxykinaseputative / PEPCK putative	-4.78522	-1.29572	3.77629	2.04328	-5.83351	1.83526	0		At4g37560	17646402	17648616	sense	F6G17.13	formamidase putative /formamide amidohydrolase putative	7.72391	-1.82613	-2.0967	-1.40223	3.17117	-3.65039	7.72391
At5g66460	26555621	26558262	Complement	K1F13.12	(1-4)-beta-mannan endohydrolaseputative	-4.78418	3.068	4.0522	-2.46566	-1.08712	7.78976	0		At1g53560	19988423	19989649	Complement	T3F20.13	expressed protein	7.72116	-2.23169	-0.0865367	-3.57801	3.10901	-2.00467	7.72116
At2g39510	16498221	16500210	Complement	F12L6.17	nodulin MtN21 family protein	-4.74624	-0.163129	10.5734	-2.11939	-4.12961	7.03172	0		At5g35970	14136124	14140570	Complement	MEE13.8	DNA-binding protein putative	7.68929	-0.215133	-2.06252	-3.75629	5.61725	-1.9477	7.68929
At2g28790	12361507	12362508	Complement	F8N16.8	osmotin-like protein putative	-4.71988	-0.425279	-1.86733	9.628	-4.43322	-1.98177	0		At5g40170	16082319	16084802	Complement	MSN9.70	disease resistance familyprotein	7.67672	-1.81999	-2.77976	-1.0235	3.39145	-4.31942	7.67672
At1g74030	27842845	27845592	Complement	F2P9.10	enolase putative	-4.70314	5.10662	-0.435178	0.157978	0.234463	3.68987	0		At3g14595	4908957	4910483	sense	MIE1.24	expressed protein	7.6651	-2.73446	0.255976	-3.63784	2.82281	-2.11088	7.6651
At2g16760	7282783	7284314	sense	T24I21.17	expressed protein	-4.68825	6.52038	1.43321	-2.54363	0.898849	7.91262	0		At4g15550	8877486	8879325	Complement	FCAALL.103	UDP-glucose:indole-3-acetatebeta-D-glucosyltransferase (IAGLU)	7.64536	-1.99593	-1.89393	-1.81146	3.34473	-3.54933	7.64536
At5g15530	5038775	5040843	sense	T20K14.140	biotin carboxyl carrierprotein 2 (BCCP2)	-4.65428	5.93	-1.12689	0.371474	0.635839	3.41333	0		At3g07310	2327824	2329787	Complement	F21O3.2	expressed protein	7.63887	-0.317611	-2.29263	-2.73571	5.03338	-2.24572	7.63887
At2g41540	17333175	17336900	sense	T32G6.6	NAD-dependentglycerol-3-phosphate dehydrogenase family protein	-4.59295	7.18844	-0.630931	-0.786588	1.2249	4.7819	0		At5g28030	10030410	10032455	Complement	F15F15.100	cysteine synthase putative /O-acetylserine (thiol)-lyase putative / O-acetylserinesulfhydrylase putative	7.60799	-1.77307	-1.88403	-1.899	3.44408	-3.32987	7.60799
At1g06520	1993977	1996111	Complement	F12K11.15	phospholipid/glycerolacyltransferase family protein	-4.56938	-0.859649	0.58322	5.01057	-4.86887	-0.249165	0		At1g28600	10051000	10053103	Complement	F1K23.28	lipase putative	7.5882	-1.94482	-1.73896	-1.99758	3.38408	-3.34541	7.5882
At2g42990	17886121	17887631	sense	F23E6.2	GDSL-motif lipase/hydrolasefamily protein	-4.56238	8.45927	0.257289	-2.3779	1.80203	7.0315	0		At2g43510	18074251	18074877	sense	T1O24.25	trypsin inhibitor putative	7.57841	-2.4425	-2.34325	-0.804512	2.77087	-4.58323	7.57841
At1g58430	21715230	21716768	Complement	X7J.14	GDSL-motif lipase/hydrolase familyprotein	-4.48467	8.98973	0.474771	-2.81059	1.95662	7.77841	0		At4g39640	18400021	18402946	sense	F23K16.11	gamma-glutamyltranspeptidasefamily protein	7.51695	-1.33988	-2.60936	-1.84361	4.07842	-3.55044	7.51695
At4g22753	11952030	11953620	Complement	T12H17.140	sterol desaturase familyprotein	-4.44232	2.93483	1.79528	-0.661989	-0.926392	4.51073	0		At1g52870	19689415	19691531	sense	F14G24.14	peroxisomal membraneprotein-related	7.50563	-0.0397143	-3.11162	-2.83747	5.82585	-2.6562	7.50563
At4g14440	8306741	8307749	Complement	FCAALL.212	enoyl-CoA hydratase/isomerasefamily protein	-4.35599	5.27009	-3.69345	2.88027	0.541004	0.99342	0		At5g42270	16919714	16923100	sense	K5J14.13	FtsH protease putative	7.48243	0.168351	-4.41096	-1.73916	6.04589	-3.43357	7.48243
At2g39330	16426674	16428928	Complement	T16B24.3	jacalin lectin family protein	-4.32362	-0.801756	0.269406	5.14421	-4.57009	-0.465558	0		At1g56500	21163409	21170986	sense	F13N6.1	haloacid dehalogenase-likehydrolase family protein	7.4776	-1.11875	-3.25599	-1.82943	4.59345	-3.85495	7.4776
At5g24610	8428081	8429255	sense	K18P6.15	expressed protein	-4.30925	-0.691218	4.90646	0.341377	-4.41449	3.22303	0		At2g25080	10675137	10677089	sense	F13D4.40	phospholipid hydroperoxideglutathione peroxidase chloroplast / PHGPx (GPX1)	7.45052	-0.231363	-3.42389	-2.01282	5.315	-3.10505	7.45052
At5g50790	20673479	20675225	Complement	MFB16.26	nodulin MtN3 family protein	-4.28953	-2.18812	4.94476	1.79522	-6.99863	1.74056	0		At1g21065	7374199	7375778	sense	T22I11.11	expressed protein	7.43498	-0.951699	-2.59392	-1.90097	4.21542	-3.15665	7.43498
At2g38310	16057141	16058246	sense	T19C21.20	expressed protein	-4.25486	-0.925545	2.09187	2.8458	-4.68024	0.93599	0		At3g50780	18886380	18888505	Complement	F18B3.60	expressed protein	7.39049	-0.0344535	-5.25834	-1.01849	5.68847	-4.31239	7.39049
At2g05990	2322219	2325143	sense	T6P5.19	enoyl-[acyl-carrier protein]reductase [NADH] chloroplast putative / NADH-dependentenoyl-ACP reductase putative	-4.23131	4.59633	-1.37018	1.06637	0.239782	2.42721	0		At5g64120	25676532	25678228	Complement	MHJ24.10	peroxidase putative	7.34822	-1.77563	-1.84268	-1.7221	3.24047	-3.31072	7.34822
At3g54660	20240723	20244160	Complement	T5N23.20	gluthatione reductasechloroplast	-4.16327	1.41517	4.95586	-1.92673	-2.037	6.0813	0		At1g77450	29104848	29106155	sense	T5M16.4	no apical meristem (NAM) familyprotein	7.32559	-2.70014	0.0700107	-3.06499	2.53397	-2.25401	7.32559
At4g36880	17374459	17376220	Complement	AP22.67	cysteine proteinase putative	-4.15336	-0.909644	7.4725	-0.930052	-4.53704	4.55768	0		At1g66970	24996216	24999780	Complement	F1O19.5	glycerophosphoryl diesterphosphodiesterase family protein	7.32544	0.691251	-3.83527	-2.89808	6.95401	-2.49633	7.32544
At5g62210	25003553	25004715	Complement	MTG10.26	embryo-specific protein-related	-4.04486	4.82725	-2.14744	1.54661	0.462148	1.83728	0		At4g27410	13707246	13709128	Complement	F27G19.10	no apical meristem (NAM) familyprotein (RD26)	7.32534	-1.72171	-0.324239	-3.79402	3.54223	-1.78304	7.32534
At5g39220	15723044	15725454	sense	K3K3.12	hydrolase alpha/beta fold familyprotein	-4.02386	4.28422	-1.59657	1.35932	0.177111	1.97636	0		At1g42970	16129874	16132283	sense	F13A11.3	glyceraldehyde-3-phosphatedehydrogenase B chloroplast (GAPB) / NADP-dependentglyceraldehydephosphate dehydrogenase subunit B	7.31265	0.0692178	-5.62614	-0.947587	5.87336	-4.47772	7.31265
At4g18960	10382867	10388550	sense	F13C5.130	floral homeotic protein AGAMOUS(AG)	-4.01158	-4.51724	6.53678	2.58167	-10.3689	1.0274	0		At4g27030	13571957	13572928	sense	F10M23.370	expressed protein	7.30927	0.285285	-3.41769	-2.56317	6.12304	-2.55534	7.30927
At5g25610	8914236	8916724	Complement	T14C9.150	dehydration-responsive protein(RD22)	-4.00192	6.00549	1.06288	-2.43362	1.13196	6.53014	0		At3g48360	17919177	17921509	Complement	T29H11.120	speckle-type POZprotein-related	7.29433	-0.447784	-4.68908	-0.743084	4.82025	-4.4035	7.29433
At1g76550	28727596	28731900	Complement	F14G6.15	pyrophosphate--fructose-6-phosphate 1-phosphotransferasealpha subunit putative / pyrophosphate-dependent6-phosphofructose-1-kinase putative	-3.96453	4.27181	-0.433545	0.196816	0.199541	3.08133	0		At1g67865	25449952	25450400	Complement	T23K23.30	expressed protein	7.26987	-0.0315226	-2.90706	-2.81726	5.63089	-2.47711	7.26987
At3g16920	5776492	5777881	Complement	K14A17.26	glycoside hydrolase family 19protein	-3.96322	6.47254	-1.05235	-0.132565	1.01408	3.42952	0		At5g16010	5227927	5229119	sense	F1N13.150	3-oxo-5-alpha-steroid4-dehydrogenase family protein / steroid 5-alpha-reductasefamily protein	7.26544	-2.7188	-2.2288	-0.694468	2.54667	-4.69355	7.26544
At2g43360	18017828	18020315	Complement	T1O24.10	biotin synthase (BioB) (BIO2)	-3.9511	4.23592	-1.88961	1.6172	0.201919	1.74329	0		At2g41100	17145162	17146688	sense	T3K9.13	touch-responsive protein /calmodulin-related protein 3 touch-induced (TCH3)	7.26279	-1.23514	-5.43181	0.249919	4.13161	-6.14416	7.26279
At1g73220	27541937	27544352	sense	T18K17.11	sugar transporter familyprotein	-3.93817	-3.28295	12.174	-0.503	-7.47375	3.86074	0		At5g54610	22202005	22203733	Complement	MRB17.11	ankyrin repeat family protein	7.25932	-1.59142	-1.81596	-2.01816	3.49743	-3.07703	7.25932
At5g07030	2183361	2185702	Complement	MOJ9.20	aspartyl protease family protein	-3.91994	1.43658	-1.78058	4.32365	-1.88909	-0.258659	0		At1g68520	25712777	25714570	Complement	T26J14.9	zinc finger (B-box type) familyprotein	7.23645	-1.40193	-2.83231	-1.26742	3.71874	-3.88303	7.23645
At2g29550	12651124	12653114	Complement	F16P2.7	tubulin beta-7 chain (TUB7)	-3.91155	1.20674	-1.42416	4.15298	-2.09326	-0.159349	0		At1g76130	28566179	28568970	sense	T23E18.6	alpha-amylase putative /14-alpha-D-glucan glucanohydrolase putative	7.23212	-1.595	-2.18425	-1.70689	3.5326	-3.43072	7.23212
At5g44110	17771291	17772969	Complement	MLN1.3	ABC transporter family protein	-3.90591	2.1542	3.37188	-1.72508	-1.16223	5.74881	0		At2g41120	17147973	17149497	Complement	T3K9.11	expressed protein	7.19563	-1.74554	-1.65818	-1.92728	3.24209	-3.07756	7.19563
At2g27880	11878565	11883789	sense	F15K20.33	argonaute protein putative /AGO putative	-3.88792	-2.42955	0.201767	8.12213	-6.53308	-1.90339	0		At5g51720	21026822	21027571	sense	MIO24.14	expressed protein	7.19344	-0.885777	-5.40916	-0.033981	4.44015	-5.6188	7.19344
At1g28290	9889112	9890980	Complement	F3H9.6	pollen Ole e 1 allergen andextensin family protein	-3.8832	0.823028	-3.77269	8.97145	-2.43964	-2.33699	0		At4g18010	9991033	9994432	Complement	T6K21.190	inositol polyphosphate5-phosphatase II (IP5PII)	7.17153	-2.22549	-0.836976	-2.36384	2.83117	-2.72184	7.17153
At5g60760	24455497	24459513	sense	MUP24.19	2-phosphoglyceratekinase-related	-3.80891	0.922076	5.44123	-1.96444	-2.2467	5.73657	0		At2g44490	18371859	18374801	sense	F4I1.30	glycosyl hydrolase family 1protein	7.16964	-2.32265	-2.75398	-0.59087	2.91074	-4.82675	7.16964
At5g07280	2285041	2288687	sense	T2I1.1	leucine-rich repeat proteinkinase putative / extra sporogenous cells (ESP)	-3.80537	-2.61007	0.978122	6.57696	-6.99716	-1.34636	0		At1g70410	26537589	26541898	Complement	F17O7.5	carbonic anhydrase putative /carbonate dehydratase putative	7.13878	0.493744	-2.22521	-3.78663	6.40872	-1.41651	7.13878
At4g13710	7962428	7966440	sense	F18A5.100	pectate lyase family protein	-3.80154	8.3536	-0.67864	-1.7539	2.1225	5.29262	0		At3g50920	18933368	18934577	Complement	F18B3.200	phosphatidic acidphosphatase-related / PAP2-related	7.10741	-1.99752	-3.35911	-0.323598	3.14431	-5.11253	7.10741
At3g16440	5585950	5587753	sense	MDC8.16	jacalin lectin family protein	-3.78889	-1.52161	0.173247	5.92587	-5.03008	-1.16355	0		At3g24160	8726138	8729396	sense	MUJ8.6	expressed protein	7.09451	0.18283	-2.88913	-3.02736	5.86238	-2.25196	7.09451
At3g02550	536512	538005	Complement	F16B3.18	LOB domain protein 41 / lateralorgan boundaries domain protein 41 (LBD41)	-3.78694	1.67241	-1.80572	3.90871	-1.59442	-0.0841307	0		At5g53550	21773307	21776002	sense	MNC6.9	transporter putative	7.07705	-2.23885	-1.72362	-1.63375	2.98902	-3.60017	7.07705
At1g19850	6886870	6891365	sense	F6F9.10	transcription factor MONOPTEROS(MP) / auxin-responsive protein (IAA24) / auxin responsefactor 5 (ARF5)	-3.78582	-4.45476	6.57122	2.31673	-9.56252	1.08921	0		At3g22550	7991653	7993461	Complement	F16J14.11	senescence-associatedprotein-related	7.06423	-1.28406	-1.87429	-1.85627	3.44333	-2.85106	7.06423
At1g65060	24170890	24175165	Complement	F16G16.6	4-coumarate--CoA ligase 3 /4-coumaroyl-CoA synthase 3 (4CL3)	-3.77881	5.65247	-1.04916	0.0271832	0.86956	3.09814	0		At5g23660	7971654	7973928	Complement	MQM1.8	nodulin MtN3 family protein	7.05701	-0.605704	-1.11198	-3.81064	4.52489	-1.49358	7.05701
At3g07840	2501899	2503571	Complement	F17A17.18	polygalacturonase putative /pectinase putative	-3.75912	0.685808	4.17559	-0.959504	-2.45751	4.247	0		At5g05200	1543606	1547138	Complement	K2A11.7	ABC1 family protein	7.05354	-0.489419	-1.71341	-2.86921	4.43145	-1.91435	7.05354
At5g66750	26666177	26670299	sense	MSN2.14	SNF2 domain-containing protein /helicase domain-containing protein	-3.75607	-2.19931	2.63316	3.29819	-6.39989	0.280443	0		At1g61800	22828105	22830411	sense	F8K4.1	glucose-6-phosphate/phosphatetranslocator putative	7.04762	-3.3415	0.255642	-2.51548	1.90994	-2.59673	7.04762
At2g19170	8320584	8325678	Complement	T20K24.19	subtilase family protein	-3.75102	4.64066	-2.23946	1.49525	0.576199	1.7194	0		At1g19020	6568064	6568569	sense	F14D16.17	expressed protein	7.04749	-1.96524	-2.16293	-1.36435	3.15869	-3.79587	7.04749
At4g21590	11480379	11482726	sense	F18E5.210	bifunctional nucleaseputative	-3.74671	-1.52207	1.40452	3.94332	-5.31309	-0.109759	0		At1g17170	5869839	5870833	sense	F20D23.13	glutathione S-transferaseputative	7.03962	-1.17951	-1.60899	-2.78188	4.01157	-2.46084	7.03962
At3g51190	19027585	19028526	Complement	F24M12.230	60S ribosomal protein L8(RPL8B)	-3.74637	7.30978	-2.68895	0.549266	1.74525	2.58336	0		At5g55050	22354927	22357326	sense	K13P22.5	GDSL-motif lipase/hydrolasefamily protein	7.03916	0.34223	-2.32899	-3.78859	6.09482	-1.65219	7.03916
At3g50990	18954160	18955586	sense	F24M12.30	peroxidase putative	-3.73057	-1.10218	7.38991	-0.992474	-4.38464	4.24763	0		At5g61820	24851544	24853917	Complement	MAC9.6	expressed protein	7.03594	-3.28871	1.07841	-3.7392	2.12338	-1.8029	7.03594
At1g70830	26713609	26715096	Complement	F15H11.8	Bet v I allergen family protein	-3.72981	-3.15659	1.31953	7.25327	-9.49774	-1.391	0		At3g21660	7624502	7626661	Complement	MIL23.23	UBX domain-containing protein	7.02775	-1.44918	-2.90341	-1.01683	3.50156	-4.01244	7.02775
At5g23940	8076332	8079796	Complement	MRO11.2	transferase family protein	-3.72791	6.45848	-1.93772	0.193457	1.46565	2.93266	0		At3g23340	8350810	8353966	sense	MLM24.21	casein kinase putative	7.01252	-0.549737	-4.29607	-0.737592	4.46881	-4.21565	7.01252
At3g05600	1623397	1624768	Complement	F18C1.13	epoxide hydrolase putative	-3.72239	6.15805	-0.783508	-0.741805	1.32367	3.9667	0		At1g75750	28445202	28446023	Complement	F10A5.6	gibberellin-regulated protein 1(GASA1) / gibberellin-responsive protein 1	6.98944	-3.53408	2.41707	-5.09963	1.79395	-0.835702	6.98944
At2g33620	14241283	14244634	sense	F4P9.39	DNA-binding family protein /AT-hook protein 1 (AHP1)	-3.72131	-0.276811	0.152175	3.89373	-3.42109	-0.111873	0		At3g51610	19150536	19153057	Complement	F26O13.250	expressed protein	6.97792	-1.9421	-1.91258	-1.49319	3.04944	-3.52457	6.97792
At1g52400	19518820	19521829	sense	F19K6.15	glycosyl hydrolase family 1protein / beta-glucosidase putative (BG1)	-3.71294	-0.851949	0.64275	4.03929	-4.13765	-0.194134	0		At1g64950	24131224	24133121	sense	F13O11.25	cytochrome P450 putative	6.97711	-2.31922	-0.297207	-2.20039	2.16262	-2.28417	6.97711
At3g06220	1883678	1884726	Complement	F28L1.16	transcriptional factor B3 familyprotein	-3.67619	-0.396958	-1.98268	8.3432	-3.52581	-2.0541	0		At1g65230	24232813	24234565	sense	T23K8.14	expressed protein	6.95689	-0.60623	-4.89459	-0.481585	4.59126	-4.76611	6.95689
At3g14760	4956356	4957262	sense	T21E2.1	expressed protein	-3.67243	-0.0219837	4.9632	-0.81354	-3.10793	4.00197	0		At2g41380	17259019	17260135	sense	F13H10.7	embryo-abundant protein-related	6.93226	-2.60417	0.225764	-2.88242	2.21818	-2.01184	6.93226
At5g44620	18015006	18016785	Complement	K15C23.6	cytochrome P450 family protein	-3.66738	0.131734	-3.15652	8.94738	-2.96355	-2.53057	0		At2g03760	1149334	1150660	Complement	F19B11.21	steroid sulfotransferaseputative	6.93211	-1.87555	-1.98698	-1.66629	3.27294	-3.49824	6.93211
At5g18620	6195919	6202168	Complement	T1A4.2	DNA-dependent ATPase putative	-3.61083	-1.42494	2.80663	2.12597	-4.90504	1.01515	0		At1g50320	18642098	18643196	Complement	F14I3.8	thioredoxin x	6.92183	-0.564857	-3.44326	-1.65411	4.7128	-3.47422	6.92183
At5g10160	3185747	3187604	sense	T31P16.150	beta-hydroxyacyl-ACPdehydratase putative	-3.60246	6.06673	-0.659564	-0.872323	1.32622	4.01577	0		At1g23090	8184941	8189020	Complement	T26J12.13	sulfate transporter putative	6.90574	-3.88031	1.09294	-2.95223	1.50449	-2.20869	6.90574
At4g32830	15842457	15844540	sense	T16I18.40	protein kinase putative	-3.59344	-3.36282	5.2632	2.12628	-7.96718	1.06219	0		At4g02410	1059889	1062153	Complement	T14P8.3	lectin protein kinase familyprotein	6.89402	-1.99568	-2.46525	-0.898724	2.95691	-4.15605	6.89402
At4g27900	13890670	13893079	sense	T13J8.10	expressed protein	-3.57055	-0.178185	0.0999246	3.67217	-3.18827	-0.0703441	0		At3g04210	1105976	1108076	Complement	T6K12.17	disease resistance protein(TIR-NBS class) putative	6.88039	-1.67184	-1.39676	-2.29127	3.32135	-2.74035	6.88039
At5g55720	22573273	22574951	sense	MDF20.16	pectate lyase family protein	-3.55382	10.244	0.507035	-4.43566	3.20498	8.7603	0		At1g17050	5829092	5831326	sense	F6I1.22	geranyl diphosphate synthaseputative / GPPS putative / dimethylallyltransferaseputative / prenyl transferase putative	6.87451	-0.0861658	-2.93527	-2.61699	5.34066	-2.55539	6.87451
At5g19340	6515094	6516207	Complement	F7K24.90	expressed protein	-3.55084	4.05488	-1.28358	0.847038	0.353463	2.1575	0		At2g21330	9135232	9137293	Complement	F3K23.9	fructose-bisphosphate aldolaseputative	6.86675	-0.407386	-6.16753	0.0920036	4.7341	-5.51172	6.86675
At2g38060	15929805	15932701	Complement	T8P21.3	transporter-related	-3.54978	2.83176	1.16224	-0.619854	-0.44483	3.69193	0		At2g37770	15841961	15844079	sense	T8P21.32	aldo/keto reductase familyprotein	6.86261	-3.4887	1.63301	-4.0954	1.87202	-1.45913	6.86261
At5g46280	18786924	18790885	Complement	MPL12.6	DNA replication licensing factorputative	-3.54508	-1.02895	0.0165894	5.09899	-4.17419	-0.880436	0		At5g64840	25933949	25937036	Complement	MXK3.6	ABC transporter family protein	6.86021	-0.66653	-2.72862	-2.01806	4.45795	-2.97116	6.86021
At4g30500	14903496	14904923	sense	F17I23.160	expressed protein	-3.53944	0.724348	3.46211	-0.649256	-2.13006	3.76302	0		At2g37540	15758653	15761045	Complement	F13M22.4	short-chaindehydrogenase/reductase (SDR) family protein	6.83672	-2.42729	-2.16334	-0.581191	2.38283	-4.39313	6.83672
At2g46140	18966151	18967620	sense	T3F17.21	late embryogenesis abundantprotein putative / LEA protein putative	-3.5375	-2.74194	10.3822	-0.681774	-6.27361	3.71229	0		At2g29350	12607991	12609633	sense	F16P2.27	tropinone reductase putative /tropine dehydrogenase putative	6.8242	-2.61233	-2.55648	-0.342411	2.49348	-4.94892	6.8242
At3g17810	6094157	6096572	sense	MEB5.3	dihydroorotate dehydrogenasefamily protein / dihydroorotate oxidase family protein	-3.52679	1.87783	-2.53766	4.27152	-1.22377	-0.482392	0		At1g80440	30246499	30247956	sense	F5I6.25	kelch repeat-containing F-boxfamily protein	6.81213	-2.98142	-2.61454	0.0798591	2.12499	-5.49864	6.81213
At5g48480	19661901	19663103	sense	MJE7.12	expressed protein	-3.51994	-1.87462	-0.865876	8.55531	-5.13669	-2.41864	0		At4g23270	12171113	12173935	sense	F21P8.160	protein kinase family protein	6.78357	-1.51647	-1.7854	-1.71569	3.18781	-2.99635	6.78357
At1g07410	2276267	2277151	sense	F22G5.24	Ras-related GTP-binding proteinputative	-3.50866	0.198644	7.00766	-2.2709	-2.75203	5.74228	0		At2g38470	16115537	16117844	sense	T19C21.4	WRKY family transcriptionfactor	6.77994	-1.93888	-2.77074	-0.623881	2.95776	-4.44322	6.77994
At4g38660	18066171	18068095	Complement	F20M13.220	thaumatin putative	-3.50851	0.723911	-2.77528	6.41344	-2.25552	-1.66804	0		At3g47040	17335216	17338090	Complement	F13I12.90	glycosyl hydrolase family 3protein	6.77795	-0.0680483	-4.97923	-0.960849	5.30932	-4.1647	6.77795
At5g05270	1563321	1565008	sense	K18I23.7	chalcone-flavanone isomerasefamily protein	-3.50229	3.82054	-1.15553	0.87106	0.230085	2.09809	0		At5g44580	17996538	17997634	sense	K15C23.2	expressed protein	6.77731	-1.39453	-1.91299	-1.75738	3.34805	-2.98545	6.77731
At4g02060	901388	905590	sense	T10M13.7	prolifera protein (PRL) / DNAreplication licensing factor Mcm7 (MCM7)	-3.50204	-0.691709	-0.00913368	4.50775	-3.7186	-0.609609	0		At1g02820	623782	624474	Complement	F22D16.18	late embryogenesis abundant 3family protein / LEA3 family protein	6.7558	-2.42066	-0.632533	-2.2644	2.53841	-2.69373	6.7558
At5g51750	21037433	21040007	sense	MIO24.12	subtilase family protein	-3.49971	2.05508	-2.85038	4.37263	-1.07767	-0.581142	0		At3g03470	824559	826444	Complement	T21P5.11	cytochrome P450 putative	6.75229	-0.906679	-0.234841	-4.64368	4.1337	-0.991859	6.75229
At2g24210	10301410	10304481	sense	F27D4.12	myrcene/ocimene synthase(TPS10)	-3.48828	3.2126	4.1553	-3.83872	-0.174798	8.04551	0		At1g07010	2152886	2155717	sense	F10K1.27	calcineurin-like phosphoesterasefamily protein	6.75129	-0.957764	-2.86106	-1.20778	3.73486	-3.4465	6.75129
At5g56040	22712104	22715854	sense	MDA7.8	leucine-rich repeat proteinkinase putative	-3.47914	0.495638	3.60601	-0.561843	-2.42304	3.53981	0		At3g27880	10339449	10340673	sense	K16N12.10	expressed protein	6.74586	-0.641827	-1.82911	-2.42111	4.04557	-2.16105	6.74586
At4g19690	10707436	10709025	sense	T16H5.50	iron-responsive transporter(IRT1)	-3.47611	-2.95152	6.59285	1.0614	-7.19937	1.86739	0		At3g59030	21830048	21833015	sense	F17J16.80	transparent testa 12 protein(TT12) / multidrug transporter-like protein	6.73496	-0.672999	-3.03611	-1.50662	4.22114	-3.2532	6.73496
At4g26760	13478598	13481757	Complement	F10M23.100	microtubule associated protein(MAP65/ASE1) family protein	-3.46563	1.3983	-2.60279	4.96494	-1.59677	-0.933976	0		At5g13730	4428700	4430837	Complement	MSH12.20	RNA polymerase sigma subunitSigD (sigD) / sigma-like factor (SIG4)	6.73369	-1.06845	-3.19234	-0.960472	3.70593	-3.84851	6.73369
At4g11380	6920503	6925964	sense	F8L21.170	beta-adaptin putative	-3.45088	-0.315446	5.82324	-1.1575	-3.24362	4.21215	0		At1g32080	11537328	11539780	Complement	T12O21.2	membrane protein putative	6.71324	0.0357192	-4.63955	-1.1777	5.35085	-3.76067	6.71324
At5g62390	25069275	25071515	Complement	MMI9.22	calmodulin-binding familyprotein	-3.44908	1.36257	-2.35415	4.71402	-1.58661	-0.761748	0		At1g76080	28552680	28554313	Complement	T23E18.2	thioredoxin family protein	6.70901	-0.565311	-5.77849	0.0156408	4.68739	-5.44394	6.70901
At4g22010	11663336	11666727	sense	F1N20.110	multi-copper oxidase type Ifamily protein	-3.44209	4.31527	-1.16231	0.495242	0.55406	2.38622	0		At1g03400	842746	844189	Complement	F21B7.39	2-oxoglutarate-dependentdioxygenase putative	6.70431	-1.44192	-1.81867	-1.96025	3.43044	-2.92284	6.70431
At5g67070	26785321	26786072	sense	K21H1.3	rapid alkalinization factor(RALF) family protein	-3.43961	3.74634	-3.4266	3.05584	0.228219	0.263733	0		At5g57040	23101131	23102472	Complement	MHM17.18	lactoylglutathione lyase familyprotein / glyoxalase I family protein	6.69613	-2.516	-0.662116	-2.14786	2.46277	-2.80689	6.69613
At3g20630	7203007	7208346	Complement	K10D20.26	ubiquitin-specific protease 14putative (UBP14)	-3.43944	-0.759032	-1.79664	7.76823	-3.71884	-2.23301	0		At5g09440	2938348	2939462	sense	T5E8.240	phosphate-responsive proteinputative	6.69265	-3.82972	-0.980154	-0.826564	1.56656	-4.32663	6.69265
At2g45600	18796662	18798026	sense	F17K2.13	expressed protein	-3.43719	3.41517	3.82006	-3.78171	0.00722193	7.85932	0		At4g17840	9918067	9920488	Complement	T6K21.20	expressed protein	6.69191	-2.42171	-0.103296	-2.64016	2.34654	-2.18041	6.69191
At5g28640	10647575	10649896	Complement	F4I4.20	SSXT protein-related /glycine-rich protein	-3.43445	-0.83794	-0.987809	6.56964	-3.83198	-1.59365	0		At5g39680	15900407	15903616	Complement	MIJ24.150	pentatricopeptide (PPR)repeat-containing protein	6.68792	-1.57706	-1.81999	-1.84344	3.30943	-3.05682	6.68792
At1g15360	5283536	5284668	sense	F9L1.31	AP2 domain-containingtranscription factor family protein	-3.43019	7.77679	1.4673	-4.60374	2.38162	9.09047	0		At5g59750	24090515	24092765	sense	MTH12.13	riboflavin biosynthesis proteinputative	6.6815	-0.970624	-1.93905	-2.16901	3.80424	-2.57307	6.6815
At3g18820	6484107	6486252	sense	MVE11.21	Ras-related GTP-binding proteinputative	-3.40292	4.62291	-1.53925	0.655468	0.724779	2.18724	0		At5g20380	6887727	6892410	Complement	F5O24.270	transporter-related	6.66857	-0.825553	-2.92072	-0.904949	3.50604	-3.41108	6.66857
At2g42840	17833078	17834560	Complement	F7D19.16	protodermal factor 1 (PDF1)	-3.39768	-1.20403	-2.47342	13.2111	-4.21501	-3.30744	0		At2g16740	7274804	7276024	sense	T24I21.15	ubiquitin-conjugating enzymeputative	6.66494	-1.71558	-1.4926	-1.77075	2.9458	-2.90607	6.66494
At1g78090	29378784	29381397	sense	T11I11.2	trehalose-6-phosphatephosphatase (TPPB)	-3.39636	-1.03806	5.66656	-0.433126	-4.01387	3.32688	0		At5g57350	23248105	23253798	Complement	MJB24.16	ATPase 3 plasma membrane-type /proton pump 3	6.66347	0.549087	-1.09692	-5.47737	6.18864	-0.454746	6.66347
At4g17790	9891064	9892807	sense	FCAALL.62	expressed protein	-3.39542	-1.40665	5.78479	-0.144447	-4.4425	3.01799	0		At2g30930	13169517	13170473	sense	F7F1.14	expressed protein	6.66007	-1.65088	-1.941	-1.50861	3.10849	-3.2709	6.66007
At5g33370	12619698	12621993	Complement	F19N2.90	GDSL-motif lipase/hydrolasefamily protein	-3.39422	6.34518	2.34332	-4.8602	1.7992	9.46195	0		At5g17450	5755324	5756890	sense	K3M16.20	heavy-metal-associateddomain-containing protein / copper chaperone(CCH)-related	6.63845	-0.753886	-2.03518	-2.33005	4.10369	-2.45162	6.63845
At2g01520	235928	237130	sense	F2I9.14	major latex protein-related /MLP-related	-3.38745	-0.553489	1.8079	1.99943	-3.44887	1.03276	0		At4g09760	6148755	6151396	Complement	F17A8.110	choline kinase putative	6.62155	-1.9335	-1.1099	-1.8913	2.68794	-2.74238	6.62155
At2g40620	16961619	16964056	Complement	T2P4.3	bZIP transcription factor familyprotein	-3.37417	-0.828973	5.81268	-0.557463	-3.78934	3.45715	0		At4g14020	8095210	8095731	Complement	FCAALL.138	rapid alkalinization factor(RALF) family protein	6.60831	-1.14055	-1.92506	-2.302	3.86367	-2.71448	6.60831
At4g36180	17120088	17123844	Complement	F23E13.70	leucine-rich repeat familyprotein	-3.37263	0.360597	-2.15607	5.9603	-2.48813	-1.49421	0		At1g71040	26800628	26803984	Complement	F23N20.3	multi-copper oxidase type Ifamily protein	6.60819	-1.30526	-2.1914	-1.78461	3.61336	-3.1311	6.60819
At5g15490	5027642	5030194	Complement	T20K14.100	UDP-glucose 6-dehydrogenaseputative	-3.37254	0.668653	5.66748	-2.20092	-2.17875	5.50627	0		At2g39470	16483378	16485319	sense	F12L6.13	photosystem II reaction centerPsbP family protein	6.60569	-0.591208	-3.87222	-1.0561	4.43886	-3.88566	6.60569
At5g08000	2563610	2565492	sense	F13G24.200	glycosyl hydrolase familyprotein 17	-3.36303	-0.225642	-2.51037	7.94011	-3.07834	-2.33939	0		At5g49360	20029105	20033968	Complement	K21P3.26	glycosyl hydrolase family 3protein	6.59268	-4.15183	-2.19359	0.672783	1.25182	-6.32893	6.59268
At3g62270	23053259	23057023	Complement	T17J13.230	anion exchange family protein	-3.35755	1.0579	-1.46657	3.85718	-1.75943	-0.309552	0		At1g72680	27362894	27364678	Complement	F28P22.13	cinnamyl-alcohol dehydrogenaseputative	6.58907	-2.87067	-0.680219	-1.74123	2.11525	-3.14329	6.58907
At5g48360	19612883	19615718	sense	K23F3.8	formin homology 2domain-containing protein / FH2 domain-containing protein	-3.35628	2.71011	-2.8264	3.41648	-0.453788	-0.0463166	0		At3g56260	20878950	20880003	Complement	F18O21.220	expressed protein	6.57681	-0.0599163	-2.63038	-2.8532	5.21978	-2.28234	6.57681
At5g35360	13601389	13606337	sense	T26D22.8	acetyl-CoA carboxylase biotincarboxylase subunit (CAC2)	-3.34029	4.47491	-1.32175	0.535206	0.648658	2.23303	0		At5g57345	23246652	23247861	Complement	MJB24.21	expressed protein	6.5709	0.254965	-2.51067	-2.94966	5.53707	-1.86688	6.5709
At4g34980	16656696	16659344	Complement	F11I11.8	subtilase family protein	-3.34007	0.606773	-2.48238	5.88504	-2.23698	-1.53894	0		At4g31800	15383209	15385035	sense	F28M20.1	WRKY family transcriptionfactor	6.55907	-2.33	-3.78971	0.57488	2.56488	-6.13336	6.55907
At5g45670	18545728	18547677	sense	MRA19.6	GDSL-motif lipase/hydrolasefamily protein	-3.33121	-0.489586	-1.67473	6.64443	-3.32987	-1.87378	0		At1g64780	24064433	24066293	Complement	F13O11.9	ammonium transporter 1 member 2(AMT1.2)	6.53665	-2.5376	-0.533999	-2.06706	2.26777	-2.70305	6.53665
At2g36570	15342575	15345006	sense	F1O11.20	leucine-rich repeattransmembrane protein kinase putative	-3.32546	-0.629233	-2.35648	8.39087	-3.47054	-2.59709	0		At5g52760	21404052	21404922	sense	F6N7.25	heavy-metal-associateddomain-containing protein	6.53613	-1.6905	-1.74852	-1.41137	2.85303	-3.15681	6.53613
At1g04220	1119359	1122525	Complement	F20D22.1	beta-ketoacyl-CoA synthaseputative	-3.31634	1.56567	-1.92883	3.69853	-1.35726	-0.270109	0		At2g13360	5546326	5548396	Complement	F14O4.7	serine-glyoxylateaminotransferase-related	6.528	-0.577564	-4.05455	-0.815862	4.34275	-4.04624	6.528
At1g70710	26662794	26666662	Complement	F5A18.11	endo-14-beta-glucanase (EGASE)/ cellulase	-3.30967	-0.487555	-2.97383	9.82127	-3.30865	-2.99532	0		At1g09340	3015388	3018236	sense	T31J12.6	expressed protein	6.52462	-0.0650817	-5.75263	-0.358173	5.12266	-4.7256	6.52462
At5g13520	4341543	4344674	Complement	T6I14.50	peptidase M1 family protein	-3.30292	0.974842	-1.02489	3.33046	-1.83043	-0.0230744	0		At1g13990	4794761	4796594	sense	F7A19.8	expressed protein	6.51359	-3.44831	1.83425	-4.12398	1.71597	-1.2657	6.51359
At3g07270	2314004	2317194	sense	T1B9.6	GTP cyclohydrolase I	-3.30261	-0.000243309	-1.52847	5.51839	-2.78907	-1.29824	0		At2g35940	15095912	15099494	Complement	F11F19.15	homeodomain-containing protein	6.50291	-1.47409	-2.57997	-1.30164	3.4667	-3.66022	6.50291
At4g23490	12251442	12254252	Complement	F16G20.2	fringe-related protein	-3.30051	-1.16802	6.11707	-0.488721	-4.11441	3.30767	0		At1g21680	7612994	7615328	sense	F8K7.10	expressed protein	6.46568	-2.19297	-1.6324	-1.38642	2.67438	-3.47852	6.46568
At1g74055	27852891	27853473	sense	F2P9.23	expressed protein	-3.29883	2.98215	1.231	-1.00519	-0.169021	4.0092	0		At1g76520	28720026	28722308	sense	F14G6.12	auxin efflux carrier familyprotein	6.45753	-2.45442	-1.7125	-1.02519	2.40419	-3.83608	6.45753
At1g53500	19970612	19973425	Complement	T3F20.18	NAD-dependentepimerase/dehydratase family protein	-3.28713	1.64063	3.28014	-1.61412	-1.25599	4.56684	0		At3g55010	20397596	20399783	sense	T15C9.10	phosphoribosylformylglycinamidine cyclo-ligasechloroplast / phosphoribosyl-aminoimidazole synthetase /AIR synthase (PUR5)	6.44943	-1.35747	-2.90166	-0.638895	3.1089	-3.98775	6.44943
At4g16140	9129058	9129853	sense	FCAALL.289	proline-rich family protein	-3.272	3.46065	-1.37285	1.1765	0.148504	1.63075	0		At3g62930	23272513	23272821	Complement	T20O10.30	glutaredoxin family protein	6.4258	-2.19239	-0.508929	-2.56358	2.6755	-2.36751	6.4258
At3g11400	3578394	3580535	sense	F24K9.7	eukaryotic translation initiationfactor 3G / eIF3g	-3.25019	-1.62527	14.7463	-2.97966	-4.48357	6.11871	0		At4g17090	9604978	9607350	Complement	FCAALL.5	beta-amylase (CT-BMY) /14-alpha-D-glucan maltohydrolase	6.41508	-2.99554	-1.53893	-0.764111	2.00085	-4.17404	6.41508
														At1g67870	25453030	25454675	Complement	T23K23.28	glycine-rich protein	6.40573	-0.589293	-0.303001	-4.64547	4.20679	-0.773968	6.40573
														At5g27560	9731731	9733921	sense	F15A18.20	expressed protein	6.38889	-1.05296	-3.44994	-0.656475	3.58277	-4.07367	6.38889
														At5g17170	5649205	5651160	sense	MKP11.2	rubredoxin family protein	6.38108	-0.315789	-5.5263	-0.141896	4.63098	-4.87612	6.38108
														At2g38640	16164682	16165632	Complement	T6A23.16	expressed protein	6.35608	-1.70992	-0.832107	-2.55284	2.99366	-2.24351	6.35608
														At5g22860	7639359	7642987	Complement	MRN17.9	serine carboxypeptidase S28family protein	6.34688	-1.93117	0.310318	-3.7104	2.80407	-1.39	6.34688
														At3g46750	17230929	17232446	sense	T6H20.220	hypothetical protein	6.34503	0.274013	-6.17109	-0.400504	5.49227	-4.56077	6.34503
														At1g79270	29820399	29824585	sense	YUP8H12R.13	expressed protein	6.33974	-2.82857	-0.0507768	-2.39091	2.09248	-2.47961	6.33974
														At3g01830	296061	299270	sense	F28J7.16	calmodulin-related proteinputative	6.33905	-1.55089	-1.7759	-1.67452	3.09833	-2.99149	6.33905
														At2g30950	13181402	13184300	sense	F7F1.16	FtsH protease (VAR2)	6.33636	0.340089	-2.80538	-2.83608	5.56014	-2.0285	6.33636
														At2g29630	12674111	12677388	sense	T27A16.27	thiamine biosynthesis familyprotein / thiC family protein	6.33015	-0.962487	-4.62408	-0.0596694	3.86466	-4.99815	6.33015
														At1g23310	8268405	8271888	Complement	F26F24.16	glutamate:glyoxylateaminotransferase 1 (GGT1)	6.30917	-0.812985	-4.50529	-0.16383	3.88043	-4.74558	6.30917
														At3g63130	23335596	23337888	sense	T20O10.230	RAN GTPase activating protein1 (RanGAP1)	6.3039	-1.06607	-4.06627	-0.382609	3.80423	-4.61094	6.3039
														At4g28030	13937684	13939150	Complement	T13J8.140	GCN5-relatedN-acetyltransferase (GNAT) family protein	6.2795	-0.726022	-3.48445	-0.845849	3.87607	-3.73542	6.2795
														At5g23120	7778124	7780631	sense	MYJ24.11	photosystem IIstability/assembly factor chloroplast (HCF136)	6.2784	-0.241636	-4.51987	-0.762245	4.65665	-3.99645	6.2784
														At5g03350	815673	816657	Complement	F12E4.80	legume lectin family protein	6.2521	-0.0505573	-2.24674	-2.96406	4.95227	-1.94743	6.2521
														At1g57770	21398861	21401945	sense	T8L23.23	amine oxidase family	6.23531	-0.40817	-3.88809	-1.08618	4.46464	-3.67633	6.23531
														At2g45740	18846667	18848473	sense	F4I18.28	peroxisomal biogenesis factor 11family protein / PEX11 family protein	6.22925	-1.85521	-1.70234	-1.47901	2.83223	-3.21832	6.22925
														At1g56190	21032030	21034314	sense	F14G9.19	phosphoglycerate kinaseputative	6.22924	-0.0936636	-4.02051	-1.22792	4.82443	-3.42905	6.22924
														At3g28500	10683334	10683968	sense	T20D4.1	60S acidic ribosomal protein P2(RPP2C)	6.20878	-1.6177	-1.17795	-2.19091	3.01334	-2.48664	6.20878
														At1g22190	7835771	7837277	sense	F16L1.8	AP2 domain-containingtranscription factor putative	6.2029	-0.00839162	-3.6604	-1.70744	5.00058	-3.0659	6.2029
														At2g29490	12638556	12639550	Complement	F16P2.13	glutathione S-transferaseputative	6.18373	-1.27374	-1.67181	-1.84234	3.19381	-2.63449	6.18373
														At5g14780	4776987	4779497	sense	T9L3.80	formate dehydrogenase (FDH)	6.1661	-0.146589	-1.09916	-4.08546	4.72793	-1.06617	6.1661
														At1g33600	12180756	12182305	sense	T1E4.2	leucine-rich repeat familyprotein	6.15111	-0.69972	-3.35797	-1.00072	3.92351	-3.57503	6.15111
														At1g62570	23172801	23175770	sense	T3P18.13	flavin-containing monooxygenasefamily protein / FMO family protein	6.12544	-1.16183	-0.784777	-3.11411	3.45305	-1.7036	6.12544
														At5g23210	7811613	7815042	sense	MKD15.7	serine carboxypeptidase S10family protein	6.11426	-4.88223	1.54114	-2.24293	0.5768	-2.4532	6.11426
														At2g32160	13669296	13673346	sense	F22D22.9	expressed protein	6.10624	-2.73608	-0.290816	-2.04756	2.02142	-2.63349	6.10624
														At1g64900	24116878	24118647	sense	F13O11.20	cytochrome P450 putative	6.08992	-1.33591	-2.69873	-1.01342	3.28562	-3.64451	6.08992
														At1g57590	21331025	21333313	Complement	T8L23.6	pectinacetylesterase putative	6.08804	-1.41966	-1.89332	-1.4153	2.99472	-3.01072	6.08804
														At1g43670	16470547	16472937	sense	F2J6.2	fructose-16-bisphosphataseputative / D-fructose-16-bisphosphate 1-phosphohydrolaseputative / FBPase putative	6.08559	-2.60868	0.335941	-2.70106	1.97744	-1.92236	6.08559
														At1g12110	4105235	4109543	sense	T28K15.20	nitrate/chlorate transporter(NRT1.1) (CHL1)	6.08141	-2.2845	-1.67884	-0.943234	2.29763	-3.64666	6.08141
														At1g68830	25876119	25879169	Complement	F14K14.6	protein kinase family protein	6.07875	-1.89693	-0.771228	-2.12837	2.55722	-2.36374	6.07875
														At1g64680	24039684	24041064	sense	F1N19.25	expressed protein	6.07691	-1.41466	-2.39127	-1.25356	3.25168	-3.42999	6.07691
														At1g20020	6942796	6945006	sense	T20H2.20	ferredoxin--NADP(+) reductaseputative / adrenodoxin reductase putative	6.06755	-0.155046	-5.69442	-0.0731579	4.68341	-4.79688	6.06755
														At5g43750	17597193	17598449	Complement	MQD19.9	expressed protein	6.06732	-0.106373	-4.79399	-0.656376	4.73866	-4.05008	6.06732
														At3g02150	391098	392765	sense	F14P3.20	TCP family transcription factorputative	6.05681	-0.621202	-2.97919	-1.37195	3.96774	-3.13481	6.05681
														At4g23220	12153967	12156948	Complement	F21P8.110	protein kinase family protein	6.04167	-1.33897	-1.66333	-1.60664	2.95736	-2.70079	6.04167
														At1g69730	26232295	26235002	Complement	T6C23.7	protein kinase family protein	6.01077	-1.52272	-2.06626	-1.38132	3.07788	-3.23357	6.01077
														At2g34070	14394505	14397309	Complement	T14G11.19	expressed protein	6.00518	-0.156547	-3.61381	-1.38145	4.60072	-3.17289	6.00518
														At1g52510	19565196	19568941	Complement	F6D8.27	hydrolase alpha/beta fold familyprotein	6.00284	0.200712	-2.81524	-2.19462	5.00354	-2.14764	6.00284
														At1g66090	24605809	24608426	sense	F15E12.17	disease resistance protein(TIR-NBS class) putative	5.99754	-1.84488	-1.70495	-1.24743	2.61657	-3.22965	5.99754
														At5g63790	25543735	25545239	Complement	MBK5.27	no apical meristem (NAM) familyprotein	5.99511	-1.89449	-1.39683	-1.63151	2.6879	-2.95401	5.99511
														At3g61180	22656541	22658642	sense	T20K12.80	zinc finger (C3HC4-type RINGfinger) family protein	5.97141	-1.04082	-1.23064	-2.62241	3.47769	-1.99439	5.97141
														At5g53580	21782305	21784210	Complement	MNC6.12	aldo/keto reductase familyprotein	5.95468	-0.850455	-4.32286	-0.117446	3.67373	-4.59751	5.95468
														At3g52370	19428468	19430760	sense	T25B15.140	beta-Ig-H3 domain-containingprotein / fasciclin domain-containing protein	5.95335	-1.85981	-1.82856	-1.15343	2.63637	-3.35994	5.95335
														At4g17245	9669377	9670017	sense	FCAALL.189	zinc finger (C3HC4-type RINGfinger) family protein	5.94219	-2.67681	-2.7938	0.531393	1.82775	-5.56856	5.94219
														At1g15010	5171202	5171737	sense	T15D22.5	expressed protein	5.93948	-1.11381	-3.45432	-0.457365	3.36106	-4.13864	5.93948
														At1g28370	9955955	9956926	Complement	F3M18.20	ERF domain protein 11 (ERF11)	5.89857	-1.44369	-1.889	-1.44556	2.98027	-2.9944	5.89857
														At5g57660	23372690	23374215	sense	MUA2.27	zinc finger (B-box type) familyprotein	5.89678	-3.343	-0.285513	-1.30724	1.37773	-3.14528	5.89678
														At5g24210	8217341	8219622	sense	K12G2.1	lipase class 3 family protein	5.87396	-1.48607	-1.44423	-1.94765	3.03433	-2.6059	5.87396
														At1g05010	1431189	1432857	Complement	T7A14.12	1-aminocyclopropane-1-carboxylate oxidase / ACC oxidase /ethylene-forming enzyme (ACO) (EAT1)	5.86284	-1.75376	-0.623447	-2.54026	2.76773	-2.08583	5.86284
														At1g60730	22361700	22363814	Complement	F8A5.24	aldo/keto reductase familyprotein	5.84793	-1.0295	-2.20502	-1.35883	3.25182	-2.90542	5.84793
														At4g13180	7657192	7658193	Complement	F17N18.70	short-chaindehydrogenase/reductase (SDR) family protein	5.8412	-2.04783	-1.04579	-1.83545	2.53731	-2.7476	5.8412
														At2g01850	385222	387343	sense	T23K3.4	xyloglucan:xyloglucosyltransferase / xyloglucan endotransglycosylase /endo-xyloglucan transferase (EXGT-A3)	5.83132	-5.49934	0.892414	-1.043	0.135993	-3.51944	5.83132
														At1g51110	18939016	18941327	sense	F23H24.16	plastid-lipid associatedprotein PAP / fibrillin family protein	5.82471	-0.398668	-3.95522	-1.04451	4.38438	-3.71483	5.82471
														At4g38810	18115277	18119071	Complement	T9A14.90	calcium-binding EF hand familyprotein	5.81168	-3.17285	-0.787268	-0.885893	1.45242	-3.54558	5.81168
														At4g11570	7004327	7006075	sense	F25E4.190	haloacid dehalogenase-likehydrolase family protein	5.80637	-1.25998	-0.454897	-3.25225	3.21906	-1.49537	5.80637
														At5g43260	17374615	17375310	Complement	MNL12.8	chaperone protein dnaJ-related	5.80404	-2.91898	1.38209	-3.66192	1.79282	-1.25909	5.80404
														At1g06830	2097150	2097654	sense	F4H5.9	glutaredoxin family protein	5.79415	-1.40759	-1.73384	-1.6462	3.02363	-2.80357	5.79415
														At4g37370	17569822	17571698	Complement	F6G17.20	cytochrome P450 putative	5.79216	-1.43845	-1.53822	-1.77327	2.97156	-2.65811	5.79216
														At5g66400	26535523	26536468	Complement	K1L20.1	dehydrin (RAB18)	5.78986	-2.54578	0.499979	-2.80768	1.90997	-1.72126	5.78986
														At5g18470	6127799	6129679	sense	F20L16.190	curculin-like(mannose-binding) lectin family protein	5.78968	-1.85487	-1.7889	-1.03544	2.48448	-3.32584	5.78968
														At1g64860	24101616	24104615	sense	F13O11.16	RNA polymerase sigma subunitSigA (sigA) / sigma factor 1 (SIG1)	5.78933	-0.631507	-4.53969	-0.0204152	3.69877	-4.54228	5.78933
														At3g04000	1035507	1036679	sense	T11I18.11	short-chaindehydrogenase/reductase (SDR) family protein	5.77562	-2.77153	-0.70896	-1.444	1.8768	-3.07802	5.77562
														At1g80840	30388584	30390388	sense	F23A5.19	WRKY family transcriptionfactor	5.75798	-0.490708	-3.58191	-0.749536	3.86356	-3.54374	5.75798
														At1g06430	1960057	1963006	Complement	T2D23.13	FtsH protease putative	5.75086	-1.12891	0.22079	-4.32095	3.38364	-0.788437	5.75086
														At5g13320	4268905	4271054	sense	T31B5.140	auxin-responsive GH3 familyprotein	5.75042	-1.81452	-2.77726	-0.265551	2.59344	-4.29145	5.75042
														At1g08550	2707427	2709534	sense	F22O13.3	violaxanthin de-epoxidaseprecursor putative (AVDE1)	5.74495	-0.751785	-2.99433	-1.05499	3.62634	-3.29673	5.74495
														At4g31870	15410211	15411623	sense	F11C18.70	glutathione peroxidaseputative	5.73691	-0.856629	-2.02585	-2.01004	3.66774	-2.52995	5.73691
														At3g07690	2457241	2459558	sense	F17A17.3	NAD-dependentglycerol-3-phosphate dehydrogenase family protein	5.72673	-2.33179	-0.123288	-2.40801	2.1742	-2.12573	5.72673
														At4g33670	16169051	16171482	Complement	T16L1.160	L-galactose dehydrogenase(L-GalDH)	5.72466	0.0347978	-2.23473	-2.77667	4.71662	-1.86284	5.72466
														At5g51110	20795360	20796660	Complement	MWD22.5	expressed protein	5.70418	0.396332	-5.39829	-0.586948	5.16848	-3.81005	5.70418
														At1g62250	22998735	23001242	Complement	F19K23.17	expressed protein	5.70359	-1.88757	0.0997835	-2.96167	2.4111	-1.54296	5.70359
														At2g29650	12680460	12683126	Complement	T27A16.25	inorganic phosphatetransporter putative	5.68637	0.123177	-3.37579	-1.65209	4.74679	-2.68552	5.68637
														At1g55920	20915781	20917112	sense	F14J16.18	serine O-acetyltransferaseputative	5.68289	-1.96177	-0.484607	-2.16994	2.31216	-2.14745	5.68289
														At3g28030	10425490	10432441	sense	MMG15.7	UV hypersensitive protein (UVH3)/ DNA-repair protein putative	5.68257	-1.85952	-2.07929	-0.702264	2.42365	-3.64005	5.68257
														At2g05520	2026159	2027096	sense	T20G20.13	glycine-rich protein (GRP)	5.68222	-3.91658	-0.0487181	-1.01214	0.915247	-3.35711	5.68222
														At1g71500	26939700	26941269	sense	F26A9.12	Rieske [2Fe-2S]domain-containing protein	5.68101	-0.194575	-5.03466	-0.219057	4.37418	-4.34824	5.68101
														At3g25660	9340678	9343441	Complement	T5M7.15	glutamyl-tRNA(Gln)amidotransferase putative	5.68062	0.0193385	-4.10919	-1.02082	4.63513	-3.38699	5.68062
														At1g11860	4001294	4003441	sense	F12F1.30	aminomethyltransferaseputative	5.6756	-0.258065	-4.27109	-0.605253	4.2279	-3.80816	5.6756
														At2g21640	9261539	9262705	sense	F2G1.9	expressed protein	5.66707	-1.77384	-1.69969	-1.23482	2.59501	-3.13931	5.66707
														At4g16990	9560154	9565473	sense	FCAALL.324	disease resistance protein(TIR-NBS class) putative	5.63164	-1.89184	-1.9359	-0.842718	2.42804	-3.50268	5.63164
														At2g37970	15898050	15898921	sense	T8P21.12	SOUL heme-binding familyprotein	5.62923	-0.605023	-1.31123	-2.91386	3.82842	-1.66136	5.62923
														At3g53930	19977330	19981791	sense	F5K20.230	protein kinase family protein	5.62035	-0.936384	-2.95446	-0.788531	3.30207	-3.48096	5.62035
														At5g40450	16202027	16212756	Complement	MPO12.160	expressed protein	5.62004	-0.907443	-1.33681	-2.46516	3.44212	-1.96767	5.62004
														At1g70580	26616295	26619732	sense	F24J13.15	glutamate:glyoxylateaminotransferase 2 (GGT2)	5.61909	-0.825812	-0.0753781	-4.10132	3.50646	-0.783235	5.61909
														At1g58180	21541600	21543461	Complement	T18I24.9	carbonic anhydrase familyprotein / carbonate dehydratase family protein	5.61881	-1.68022	0.63757	-3.50652	2.2006	-0.875393	5.61881
														At1g04350	1165164	1166767	sense	F19P19.22	2-oxoglutarate-dependentdioxygenase putative	5.61472	-2.65541	1.05602	-3.28451	1.76256	-1.309	5.61472
														At3g45940	16897211	16900156	Complement	F16L2.150	alpha-xylosidase putative	5.60449	-2.36315	0.714657	-3.25391	2.06879	-1.38679	5.60449
														At1g78290	29461388	29464281	Complement	F3F9.17	serine/threonine protein kinaseputative	5.60341	-2.11897	-1.76245	-0.742094	2.18133	-3.57453	5.60341
														At5g10380	3267719	3268814	sense	F12B17.270	zinc finger (C3HC4-type RINGfinger) family protein	5.60177	-0.455114	-3.74679	-0.857483	4.05462	-3.61558	5.60177
														At4g09350	5931248	5932149	Complement	T30A10.110	DNAJ heat shock N-terminaldomain-containing protein	5.59615	-0.645134	-2.24505	-1.8464	3.74337	-2.51921	5.59615
														At1g18730	6460590	6462212	sense	F6A14.16	expressed protein	5.59343	-1.38751	-1.7372	-1.32248	2.75162	-2.82974	5.59343
														At4g21210	11306955	11308749	sense	F7J7.150	expressed protein	5.58858	-0.402487	-1.89046	-2.45378	4.01851	-1.97709	5.58858
														At5g67600	26976797	26977535	Complement	K9I9.17	expressed protein	5.58139	-0.879754	0.440249	-4.74415	3.37711	-0.385714	5.58139
														At2g20880	8993054	8994344	sense	F5H14.15	AP2 domain-containingtranscription factor putative	5.57468	-1.51946	-1.23029	-1.81436	2.70709	-2.44468	5.57468
														At1g71490	26935602	26939033	Complement	F26A9.13	pentatricopeptide (PPR)repeat-containing protein	5.56509	-1.89776	-0.72003	-1.90082	2.30558	-2.31755	5.56509
														At5g15850	5176094	5177900	Complement	F14F8.230	zinc finger proteinCONSTANS-LIKE 1 (COL1)	5.55577	-0.250008	-1.48745	-3.00454	4.16035	-1.49157	5.55577
														At5g54660	22221131	22222378	sense	MRB17.16	heat shock protein-related	5.54457	-1.33818	-1.0972	-1.97278	2.74695	-2.16095	5.54457
														At5g38510	15435069	15437232	Complement	MXI10.22	rhomboid family protein	5.54111	-1.05968	-2.10796	-1.38351	3.1417	-2.81958	5.54111
														At3g51390	19086555	19089096	sense	F26O13.30	zinc finger (DHHC type) familyprotein	5.53806	-1.03305	-3.39696	-0.380883	3.23545	-3.99237	5.53806
														At5g45680	18548107	18549508	sense	MRA19.7	FK506-binding protein 1 (FKBP13)	5.53425	0.231721	-4.96105	-0.570909	4.78254	-3.71491	5.53425
														At1g52590	19592678	19593942	Complement	F6D8.19	expressed protein	5.53108	-0.453774	-2.32979	-1.84624	3.87655	-2.41192	5.53108
														At2g17040	7414207	7415352	sense	F6P23.7	no apical meristem (NAM) familyprotein	5.52189	-1.45016	-1.74362	-1.56192	2.93789	-2.8419	5.52189
														At1g76450	28689465	28691614	sense	F14G6.5	oxygen-evolving complex-related	5.51516	0.0352936	-3.13757	-1.6686	4.49885	-2.58372	5.51516
														At1g62750	23237099	23240112	Complement	F23N19.11	elongation factor Tu familyprotein	5.49172	-0.259191	-4.56724	-0.351198	4.16889	-4.06394	5.49172
														At5g39050	15651815	15653293	sense	MXF12.60	transferase family protein	5.49156	-4.09228	1.51295	-2.47711	0.791522	-2.00739	5.49156
														At1g72180	27166482	27171092	sense	T9N14.3	leucine-rich repeat transmembraneprotein kinase putative	5.47689	0.0577932	-3.91623	-1.11724	4.54406	-3.19022	5.47689
														At1g17420	5977404	5981473	sense	F1L3.11	lipoxygenase putative	5.47125	-0.769336	-3.76684	-0.391543	3.54964	-3.98775	5.47125
														At4g15530	8864826	8870934	Complement	FCAALL.325	pyruvate phosphate dikinasefamily protein	5.46894	-3.60439	3.52322	-5.28757	1.02954	-0.0830375	5.46894
														At1g51700	19177738	19178857	sense	F19C24.9	Dof-type zinc fingerdomain-containing protein (ADOF1)	5.46024	-2.06336	-3.05516	0.257288	2.32083	-4.81167	5.46024
														At3g15540	5264031	5265683	sense	MJK13.22	auxin-responsive protein /indoleacetic acid-induced protein 19 (IAA19)	5.45334	-1.37037	-0.909866	-2.227	2.78135	-2.00952	5.45334
														At2g34930	14744145	14746983	Complement	F19I3.16	disease resistance familyprotein	5.45262	-0.832312	-1.78233	-1.87855	3.33424	-2.29569	5.45262
														At3g60650	22430926	22431249	sense	T4C21.60	expressed protein	5.4434	-1.53685	-2.04414	-1.00921	2.69182	-3.23829	5.4434
														At3g19130	6611219	6614050	Complement	MVI11.3	RNA-binding protein putative	5.4429	-0.0575162	-3.04969	-1.59865	4.32856	-2.61157	5.4429
														At5g28020	10026187	10028584	Complement	F15F15.90	cysteine synthase putative /O-acetylserine (thiol)-lyase putative / O-acetylserinesulfhydrylase putative	5.43593	-2.26678	-2.80442	0.485024	1.87293	-5.09881	5.43593
														At2g25680	10940245	10941615	Complement	F3N11.13	expressed protein	5.42409	-1.41746	-1.81863	-1.31561	2.78205	-2.89768	5.42409
														At2g37760	15838940	15840997	sense	T8P21.6	aldo/keto reductase familyprotein	5.42034	-4.18298	2.46238	-3.36869	0.684108	-1.24893	5.42034
														At5g56870	23021422	23025875	sense	MPI10.3	beta-galactosidase putative /lactase putative	5.41293	-4.11933	3.76673	-4.90527	0.70078	-0.259067	5.41293
														At2g36750	15417541	15419117	Complement	F13K3.15	UDP-glucoronosyl/UDP-glucosyltransferase family protein	5.41198	-1.2195	-1.68335	-1.48298	2.84003	-2.59119	5.41198
														At3g23540	8443494	8448077	sense	MDB19.2	expressed protein	5.4026	-1.35363	-1.5466	-1.42884	2.67508	-2.61162	5.4026
														At4g38550	18025653	18028794	sense	F20M13.110	expressed protein	5.40155	-1.62412	-1.39143	-1.5319	2.58741	-2.69073	5.40155
														At1g07110	2178103	2184135	Complement	F10K1.19	fructose-6-phosphate 2-kinase /fructose-26-bisphosphatase (F2KP)	5.39766	-0.626541	-1.59141	-1.55082	2.99417	-1.97	5.39766
														At5g49630	20159696	20163712	Complement	K6M13.1	amino acid permease 6 (AAP6)	5.39684	-2.50732	-0.517896	-1.57446	1.81743	-2.658	5.39684
														At4g02920	1292640	1294861	sense	T5J8.24	expressed protein	5.39317	-0.778163	-2.62114	-1.18114	3.41095	-2.99026	5.39317
														At5g19540	6595704	6597891	sense	T20D1.60	expressed protein	5.39198	-0.41598	-1.87612	-2.25416	3.81942	-1.97619	5.39198
														At1g49470	18314162	18315302	sense	F13F21.10	expressed protein	5.38915	-1.99831	0.202738	-2.90162	2.27439	-1.54467	5.38915
														At3g19450	6744769	6747220	sense	MLD14.30	cinnamyl-alcohol dehydrogenase(CAD)	5.38669	-0.587335	-1.99046	-1.89989	3.58251	-2.24393	5.38669
														At4g16690	9392169	9393491	Complement	FCAALL.12	esterase/lipase/thioesterasefamily protein	5.37484	-3.89495	-0.611357	-0.24868	0.738142	-4.0015	5.37484
														At4g08850	5636486	5640633	Complement	T32A17.160	leucine-rich repeat familyprotein / protein kinase family protein	5.37004	-1.59455	-2.01404	-1.01196	2.6636	-3.25357	5.37004
														At3g01060	16650	18847	Complement	T4P13.26	expressed protein	5.36934	-0.419986	-2.99924	-1.253	3.84415	-2.94274	5.36934
														At1g01560	202267	204335	sense	F22L4.10	mitogen-activated proteinkinase putative / MAPK putative (MPK11)	5.36629	-1.63456	-0.899708	-1.79571	2.38374	-2.25117	5.36629
														At4g23260	12167433	12169904	Complement	F21P8.150	protein kinase family protein	5.366	-1.53667	-1.42461	-1.62452	2.70208	-2.63266	5.366
														At4g23890	12420424	12421474	Complement	T32A16.60	expressed protein	5.36558	-0.826845	-2.80289	-1.0675	3.43503	-3.1918	5.36558
														At2g47910	19621768	19622839	sense	F17A22.30	expressed protein	5.36103	-0.775843	-2.41955	-1.44764	3.47705	-2.79873	5.36103
														At2g44210	18287699	18289952	sense	F4I1.2	expressed protein	5.35976	-1.14269	-4.11284	0.350911	2.99284	-4.82622	5.35976
														At5g19220	6463826	6466832	Complement	T24G5.120	glucose-1-phosphateadenylyltransferase large subunit 1 (APL1) / ADP-glucosepyrophosphorylase (ADG2)	5.35093	-0.182689	-4.20391	-0.432862	3.98014	-3.64802	5.35093
														At3g11440	3602100	3605110	sense	F24K9.11	myb family transcription factor(MYB65)	5.33799	-5.22724	0.636575	-0.658813	0.026108	-3.60544	5.33799
														At4g28080	13948609	13957424	Complement	T13J8.190	expressed protein	5.33657	0.0470132	-4.20589	-0.780681	4.396	-3.40385	5.33657
														At1g65260	24239923	24244322	sense	T8F5.2	PspA/IM30 family protein	5.33176	-0.585753	-3.02485	-1.0277	3.6231	-3.14584	5.33176
														At2g39850	16637704	16641331	sense	T5I7.15	subtilase family protein	5.32567	-0.603951	-1.83778	-1.94692	3.48563	-2.12672	5.32567
														At5g19240	6470131	6471064	sense	T24G5.140	expressed protein	5.31601	-1.52515	-2.67446	-0.395221	2.64852	-3.86018	5.31601
														At2g32860	13947264	13950881	sense	T21L14.20	glycosyl hydrolase family 1protein	5.31368	-0.0520842	-2.06815	-2.50542	4.27057	-1.79901	5.31368
														At3g27080	9986319	9987866	Complement	MOJ10.22	mitochondrial import receptorsubunit TOM20-3 / translocase of outer membrane 20 kDasubunit 3 (TOM20-3)	5.31162	-1.58801	-0.37906	-2.46177	2.46714	-1.71924	5.31162
														At2g46220	18986544	18987843	sense	T3F17.13	expressed protein	5.29992	-0.932854	-3.47444	-0.380747	3.2978	-3.90955	5.29992
														At2g46600	19143090	19143643	sense	F13A10.13	calcium-binding proteinputative	5.29631	-1.92719	-2.8371	0.165679	2.21432	-4.52129	5.29631
														At2g39360	16444550	16447232	Complement	F12L6.2	protein kinase family protein	5.27689	-1.11511	-2.03741	-1.36027	3.02942	-2.79639	5.27689
														At5g06530	1989748	1994913	Complement	F15M7.6	ABC transporter family protein	5.27649	-2.92263	-0.947367	-0.648578	1.38352	-3.49471	5.27649
														At1g29700	10384967	10387427	Complement	T3M22.5	expressed protein	5.27399	-0.250388	-2.6345	-1.48395	3.85541	-2.4633	5.27399
														At5g51970	21128671	21130629	sense	MSG15.7	sorbitol dehydrogenase putative/ L-iditol 2-dehydrogenase putative	5.26488	-0.457502	-4.777	0.150153	3.68387	-4.46846	5.26488
														At5g16970	5576171	5578049	Complement	F2K13.120	NADP-dependent oxidoreductaseputative (P1)	5.25679	-1.97519	-0.681982	-1.82933	2.20143	-2.34288	5.25679
														At5g60540	24353849	24356028	Complement	MUF9.1	SNO glutamine amidotransferasefamily protein	5.25548	-1.17397	-1.64426	-1.28125	2.64731	-2.54737	5.25548
														At5g24120	8157554	8160231	Complement	MZF18.19	RNA polymerase sigma subunitSigE (sigE) / sigma-like factor (SIG5)	5.25506	-1.07897	-0.441047	-2.94792	2.95113	-1.3259	5.25506
														At5g58120	23534718	23539007	sense	K21L19.1	disease resistance protein(TIR-NBS-LRR class) putative	5.25436	-1.40975	-1.44652	-1.54999	2.66165	-2.54222	5.25436
														At3g17510	5988997	5992918	Complement	MKP6.20	CBL-interacting protein kinase 1(CIPK1)	5.25362	-0.338337	-2.50149	-1.6353	3.81021	-2.4341	5.25362
														At1g49050	18154207	18157010	sense	F27J15.15	aspartyl protease familyprotein	5.25344	-0.977581	-2.44261	-0.939306	3.01184	-3.06418	5.25344
														At2g04795	1682950	1683472	sense	F28I8.10	expressed protein	5.23714	-1.54703	-1.35332	-1.50155	2.53401	-2.5904	5.23714
														At1g61120	22527302	22532476	sense	F11P17.15	terpene synthase/cyclase familyprotein	5.23417	-1.60504	-1.73594	-1.03491	2.43626	-3.01777	5.23417
														At4g26860	13503092	13504756	Complement	F10M23.200	alanine racemase familyprotein	5.22769	-0.452975	-3.68063	-0.494028	3.60475	-3.56201	5.22769
														At5g22270	7372236	7373105	Complement	MWD9.5	expressed protein	5.19019	-4.61572	0.429617	-0.75701	0.285645	-3.40037	5.19019
														At4g16370	9247321	9250112	Complement	FCAALL.72	oligopeptide transporter OPTfamily protein	5.18716	0.63493	-2.54169	-2.68386	5.11395	-1.53627	5.18716
														At3g56370	20910078	20913960	Complement	T5P19.20	leucine-rich repeattransmembrane protein kinase putative	5.18447	-0.780155	-4.94004	0.60183	3.36054	-5.05346	5.18447
														At4g33540	16130876	16133963	sense	T16L1.30	metallo-beta-lactamase familyprotein	5.17778	-0.399369	-2.84335	-1.29374	3.74735	-2.79398	5.17778
														At3g13040	4172149	4175255	Complement	MGH6.22	myb family transcription factor	5.16941	-1.07118	-2.52595	-0.8968	3.0098	-3.20236	5.16941
														At5g52750	21401269	21402150	sense	F6N7.24	heavy-metal-associateddomain-containing protein	5.16899	-1.68932	-1.59631	-1.04889	2.32997	-2.97202	5.16899
														At4g19530	10651754	10657292	sense	F24J7.90	disease resistance protein(TIR-NBS-LRR class) putative	5.16083	-0.497608	-1.72242	-2.1649	3.56394	-1.92079	5.16083
														At4g36040	17049174	17050277	Complement	T19K4.170	DNAJ heat shock N-terminaldomain-containing protein (J11)	5.15952	-3.35479	-0.170165	-1.0673	1.06757	-3.03804	5.15952
														At1g65500	24361530	24362279	sense	F5I14.4	expressed protein	5.14646	-1.27493	-1.17887	-1.87225	2.72526	-2.17292	5.14646
														At1g06650	2035838	2037362	sense	F12K11.26	2-oxoglutarate-dependentdioxygenase putative	5.14612	-1.2008	-1.96403	-1.32017	2.9138	-2.8079	5.14612
														At5g66490	26564453	26564994	Complement	K1F13.15	expressed protein	5.14436	-1.14193	-1.34554	-1.82545	2.83372	-2.19505	5.14436
														At2g15620	6817558	6820021	sense	F9O13.17	ferredoxin--nitrite reductaseputative	5.13835	0.139939	-3.51795	-1.3249	4.40666	-2.8006	5.13835
														At4g35250	16771180	16773369	Complement	F23E12.190	vestitone reductase-related	5.13776	0.639484	-3.6136	-1.61183	5.12466	-2.31331	5.13776
														At1g09080	2929220	2931843	Complement	F7G19.5	luminal binding protein 3 (BiP-3)(BP3)	5.12969	-1.58189	-1.1586	-1.40006	2.27506	-2.46275	5.12969
														At2g46820	19250661	19252205	sense	F19D11.10	expressed protein	5.12904	0.0645758	-4.37068	-0.569773	4.28912	-3.53374	5.12904
														At1g74730	28082592	28084009	sense	F25A4.30	expressed protein	5.12895	0.388585	-4.58083	-0.793527	4.71847	-3.35581	5.12895
														At1g07450	2288004	2289253	Complement	F22G5.20	tropinone reductase putative /tropine dehydrogenase putative	5.12881	-1.41289	-2.75242	-0.330857	2.63792	-3.79868	5.12881
														At1g80380	30222157	30224863	sense	F5I6.13	phosphoribulokinase/uridinekinase-related	5.12659	-0.00473636	-3.47372	-1.14391	4.18457	-2.90046	5.12659
														At5g10470	3290122	3297249	Complement	F12B17.180	kinesin motor protein-related	5.11055	-0.435182	-3.78168	-0.380829	3.5433	-3.61733	5.11055
														At5g62140	24971732	24972610	Complement	MTG10.17	expressed protein	5.10675	-1.10804	-2.72296	-0.665592	2.94736	-3.42199	5.10675
														At5g17330	5711070	5715077	sense	MKP11.30	glutamate decarboxylase 1 (GAD1)	5.09892	-2.08375	-1.70053	-0.628714	2.01661	-3.44764	5.09892
														At4g23810	12392383	12393951	Complement	T32A16.2	WRKY family transcriptionfactor	5.09718	-1.58052	-2.09019	-0.367979	2.11456	-3.46972	5.09718
														At5g48540	19686190	19687146	Complement	MJE7.18	33 kDa secretory protein-related	5.08911	-1.46266	-1.52485	-1.32665	2.52093	-2.66748	5.08911
														At5g55450	22484716	22485489	sense	MTE17.16	protease inhibitor/seedstorage/lipid transfer protein (LTP) family protein	5.08033	-2.36907	-2.26606	0.258713	1.66163	-4.46534	5.08033
														At1g50250	18617877	18620731	Complement	F14I3.14	cell division protein ftsHhomolog 1 chloroplast (FTSH1) (FTSH)	5.07001	-0.249878	-2.88303	-1.39277	3.8818	-2.67988	5.07001
														At1g03680	916845	918001	Complement	F21B7.28	thioredoxin M-type 1chloroplast (TRX-M1)	5.06186	-0.72577	-3.85072	-0.130979	3.34169	-4.01646	5.06186
														At1g72920	27441608	27442709	sense	F3N23.12	disease resistance protein(TIR-NBS class) putative	5.05094	0.045546	-3.06817	-1.47647	4.18427	-2.5191	5.05094
														At2g36630	15359570	15362213	Complement	F1O11.14	expressed protein	5.0508	-2.55151	1.27404	-3.30188	1.59544	-1.05074	5.0508
														At5g01920	359127	362901	sense	T20L15.190	protein kinase family protein	5.0492	-0.919813	-2.95942	-0.540614	3.0282	-3.45492	5.0492
														At4g27800	13851876	13854197	Complement	T27E11.40	protein phosphatase 2C PPH1 /PP2C PPH1 (PPH1)	5.04615	-0.485658	-3.77616	-0.357505	3.52112	-3.67737	5.04615
														At1g76590	28745585	28747101	sense	F14G6.19	zinc-binding family protein	5.04382	-0.954575	-1.58026	-1.66628	2.9283	-2.23773	5.04382
														At1g35420	13026292	13027645	sense	F12A4.4	dienelactone hydrolase familyprotein	5.04352	-0.372565	-3.95516	-0.319911	3.60923	-3.67997	5.04352
														At4g15545	8875918	8877755	sense	FCAALL.167	expressed protein	5.03637	0.450427	-4.08592	-1.12781	4.71732	-2.89416	5.03637
														At1g68660	25781514	25782824	Complement	F24J5.10	expressed protein	5.03604	-1.45065	-2.22816	-0.756563	2.60192	-3.30742	5.03604
														At4g01870	808376	810446	Complement	T7B11.13	tolB protein-related	5.03456	-1.36168	-1.36749	-1.71158	2.72862	-2.41119	5.03456
														At5g16080	5252318	5253621	Complement	F1N13.220	expressed protein	5.03254	-1.93221	-0.681666	-1.7552	2.12705	-2.30087	5.03254
														At5g25840	9010727	9011501	Complement	F18A17.90	expressed protein	5.02835	-1.6509	-1.01029	-1.59275	2.29044	-2.36096	5.02835
														At3g16480	5599824	5602956	sense	MDC8.11	mitochondrial processingpeptidase alpha subunit putative	5.02749	-0.910586	-4.06928	0.25452	3.09188	-4.45455	5.02749
														At1g06690	2049601	2052059	Complement	F4H5.22	aldo/keto reductase familyprotein	5.0274	0.0387679	-2.0497	-2.18973	4.08689	-1.69504	5.0274
														At3g26160	9569517	9571123	Complement	MTC11.7	cytochrome P450 family protein	5.0174	-1.25783	-1.44865	-1.56339	2.6768	-2.39814	5.0174
														At3g61040	22604948	22607100	Complement	T27I15.130	cytochrome P450 familyprotein	5.0072	-1.22923	-2.95581	-0.238074	2.71638	-3.80556	5.0072
														At3g19770	6866836	6869481	sense	MMB12.26	vacuolar sorting protein 9domain-containing protein / VPS9 domain-containingprotein	5.00582	0.0974179	-2.80648	-1.7868	4.24464	-2.26886	5.00582
														At4g32940	15900273	15903271	Complement	F26P21.60	vacuolar processing enzymegamma / gamma-VPE	5.00203	-3.02161	0.579612	-2.034	1.22792	-2.04058	5.00203
														At5g36160	14250343	14252364	Complement	MAB16.11	aminotransferase-related	4.99999	-0.304112	-0.632536	-3.51212	3.6617	-0.80703	4.99999
														At2g34860	14715447	14717276	sense	F19I3.9	chaperone protein dnaJ-related	4.99489	0.423137	-4.78017	-0.598344	4.6499	-3.42081	4.99489
														At4g19420	10587177	10590560	Complement	T5K18.200	pectinacetylesterase familyprotein	4.99263	0.576545	-1.12234	-4.10732	4.88024	-0.446954	4.99263
														At1g76650	28771644	28772411	Complement	F28O16.2	calcium-binding EF hand familyprotein	4.99173	-1.6665	-3.30234	0.391849	2.38715	-4.6117	4.99173
														At5g26920	9476669	9478724	sense	F2P16.9	calmodulin-binding protein	4.99068	-1.75448	-1.2356	-1.24626	2.17859	-2.67452	4.99068
														At4g22890	12006997	12009529	sense	F7H19.70	expressed protein	4.98658	-0.489073	-4.81296	0.358041	3.49635	-4.55586	4.98658
														At1g02850	630512	633259	sense	F22D16.15	glycosyl hydrolase family 1protein	4.98576	-3.10024	-0.814176	-0.45182	1.09191	-3.51693	4.98576
														At5g59080	23864634	23865721	Complement	K18B18.8	expressed protein	4.97885	-1.27641	-0.542664	-2.33561	2.52278	-1.59416	4.97885
														At2g32290	13721624	13724006	Complement	T32F6.19	beta-amylase putative /14-alpha-D-glucan maltohydrolase putative	4.97856	-1.53832	-1.24403	-1.47883	2.40465	-2.47452	4.97856
														At5g13770	4445426	4447839	sense	MXE10.6	pentatricopeptide (PPR)repeat-containing protein	4.97529	-0.170567	-1.57507	-2.65965	3.87756	-1.49033	4.97529
														At1g52200	19445744	19447094	Complement	F9I5.19	expressed protein	4.9736	-1.26256	-1.11187	-1.59474	2.4237	-2.11766	4.9736
														At3g14360	4791596	4794445	sense	MLN21.14	lipase class 3 family protein	4.9634	-1.80208	-2.38813	-0.214659	2.22135	-3.8462	4.9634
														At1g16260	5559702	5562012	Complement	F3O9.6	protein kinase family protein	4.95198	-1.56192	-1.93588	-0.725775	2.31639	-3.17318	4.95198
														At5g38520	15438804	15440661	sense	MBB18.5	hydrolase alpha/beta fold familyprotein	4.95126	0.0295985	-4.41677	-0.389021	4.08009	-3.57251	4.95126
														At5g53370	21666758	21668819	Complement	K19E1.17	pectinesterase family protein	4.95023	-1.4858	-1.58539	-1.26348	2.50943	-2.73406	4.95023
														At2g47000	19316937	19321819	Complement	F14M4.17	multidrug resistant (MDR) ABCtransporter putative	4.94609	-1.29104	-1.20945	-1.64365	2.53924	-2.2182	4.94609
														At5g07020	2180503	2182387	Complement	MOJ9.19	proline-rich family protein	4.93984	0.187001	-2.80724	-1.77492	4.28576	-2.17389	4.93984
														At3g11630	3672126	3674081	sense	F24K9.28	2-cys peroxiredoxin chloroplast(BAS1)	4.93761	-4.15229	3.34675	-3.96903	0.455519	-0.595789	4.93761
														At1g04420	1191607	1193883	sense	F19P19.12	aldo/keto reductase familyprotein	4.93705	-0.520786	-2.22126	-1.55683	3.43031	-2.37991	4.93705
														At3g02730	588415	589692	Complement	F13E7.33	thioredoxin putative	4.93611	0.231841	-3.53394	-1.21971	4.34318	-2.69775	4.93611
														At3g52690	19541714	19542789	sense	F3C22.90	hypothetical protein	4.93571	-2.1512	1.48888	-3.91356	1.78829	-0.548225	4.93571
														At5g43440	17472461	17473885	Complement	MWF20.15	2-oxoglutarate-dependentdioxygenase putative	4.93546	-1.2692	-1.28706	-1.55714	2.534	-2.27172	4.93546
														At5g43780	17606418	17608762	Complement	MQD19.13	sulfate adenylyltransferase 4 /ATP-sulfurylase 4 (APS4)	4.93413	-1.55312	-2.27195	-0.473132	2.36749	-3.48625	4.93413
														At1g80830	30377771	30380588	Complement	F23A5.18	NRAMP metal ion transporter 1(NRAMP1)	4.93379	-1.81902	-2.35716	-0.161516	2.14444	-3.86209	4.93379
														At1g47960	17684826	17687298	Complement	T2J15.13	invertase/pectin methylesteraseinhibitor family protein	4.92535	-2.41687	0.753977	-2.76534	1.6589	-1.39933	4.92535
														At5g51010	20761792	20762929	sense	K3K7.19	rubredoxin family protein	4.92225	0.635428	-4.53745	-0.919622	4.88412	-3.02312	4.92225
														At2g16430	7127501	7129901	Complement	F16F14.7	purple acid phosphatase (PAP10)	4.91221	-1.52864	-3.22318	0.390624	2.27757	-4.52844	4.91221
														At4g32260	15573643	15574743	Complement	F10M6.100	ATP synthase family	4.90508	0.202076	-4.57813	-0.45315	4.30186	-3.54409	4.90508
														At1g53670	20040344	20041871	sense	F22G10.17	transcription factor-related	4.89862	0.031396	-2.00454	-2.35592	4.0681	-1.67335	4.89862
														At2g27290	11685478	11686870	Complement	F12K2.13	expressed protein	4.89762	-0.605333	-1.62926	-2.07613	3.34243	-1.9389	4.89762
														At1g28480	10013460	10014059	Complement	F3M18.8	glutaredoxin family protein	4.89741	-2.10982	-1.31136	-0.828378	1.86187	-3.08621	4.89741
														At3g26680	9802451	9805519	sense	MLJ15.7	DNA cross-link repairprotein-related	4.89392	-0.153602	-4.44033	-0.160284	3.82146	-3.81745	4.89392
														At3g28180	10507066	10510476	sense	MIG10.8	glycosyl transferase family 2protein	4.89248	-2.31514	0.786834	-2.88419	1.72396	-1.29186	4.89248
														At1g16720	5723081	5726471	sense	F17F16.7	expressed protein	4.88543	0.112071	-1.76557	-2.68708	4.15123	-1.39561	4.88543
														At4g27700	13826380	13827829	Complement	T29A15.190	rhodanese-likedomain-containing protein	4.87593	-0.100293	-3.4121	-0.880145	3.83846	-2.94023	4.87593
														At5g50915	20727435	20729541	Complement	K3K7.24	basic helix-loop-helix (bHLH)family protein	4.86594	-1.14609	-2.52102	-0.387265	2.51074	-3.38046	4.86594
														At3g18460	6333054	6333954	Complement	MYF24.18	hypothetical protein	4.86593	-1.92787	-0.307125	-1.86694	1.8818	-1.95179	4.86593
														At1g23740	8398115	8399717	Complement	F5O8.29	oxidoreductase zinc-bindingdehydrogenase family protein	4.85772	0.148388	-4.22209	-0.57915	4.17252	-3.30443	4.85772
														At1g72030	27114527	27115868	sense	F28P5.8	GCN5-related N-acetyltransferase(GNAT) family protein	4.84986	0.605209	-4.32318	-0.986918	4.7817	-2.88076	4.84986
														At1g34750	12736073	12737705	Complement	F11O6.14	protein phosphatase 2C putative/ PP2C putative	4.83907	-1.30611	-2.35182	-0.416023	2.37995	-3.35696	4.83907
														At3g04520	1217248	1219765	Complement	T27C4.17	threonine aldolase familyprotein	4.83245	-2.05694	-0.59113	-1.35117	1.69981	-2.34625	4.83245
														At1g79410	29872773	29874526	Complement	T8K14.17	transporter-related	4.82788	-1.22458	-1.77388	-1.22483	2.64906	-2.66108	4.82788
														At5g13650	4397751	4402695	sense	MSH12.11	elongation factor familyprotein	4.82757	0.0667661	-3.64595	-0.930042	4.07433	-2.97643	4.82757
														At5g62680	25182656	25185169	Complement	MRG21.10	proton-dependent oligopeptidetransport (POT) family protein	4.82718	-4.53984	2.95325	-3.12163	0.148675	-1.13529	4.82718
														At1g33811	12267846	12269893	sense	F14M2.7	GDSL-motif lipase/hydrolasefamily protein	4.82549	-1.87455	-1.66392	-0.646174	2.00375	-3.21543	4.82549
														At3g13920	4592263	4594926	Complement	MDC16.5	eukaryotic translation initiationfactor 4A-1 / eIF-4A-1	4.82412	-1.15557	-1.15942	-1.90885	2.7222	-2.03494	4.82412
														At1g26770	9259592	9261300	sense	T24P13.15	expansin putative (EXP10)	4.82388	0.62061	-4.34258	-0.988251	4.76837	-2.93202	4.82388
														At4g18810	10322449	10325781	Complement	F28A21.220	expressed protein	4.8152	-0.667583	-2.09718	-1.40367	3.15662	-2.41671	4.8152
														At1g33960	12346229	12348464	sense	T3M13.2	avirulence-responsive protein /avirulence induced gene (AIG1)	4.81411	-0.959694	-1.268	-1.92128	2.8501	-1.95417	4.81411
														At2g15310	6660874	6662583	sense	F27O10.4	ADP-ribosylation factorputative	4.80927	0.514375	-1.71731	-3.11555	4.62658	-0.987914	4.80927
														At5g48380	19621315	19624235	Complement	K23F3.10	leucine-rich repeat familyprotein / protein kinase family protein	4.7931	-1.24716	-3.24421	0.131702	2.56955	-4.1016	4.7931
														At4g04330	2116551	2118592	Complement	T19B17.5	expressed protein	4.78597	-0.527913	-2.41589	-0.997567	3.10265	-2.57725	4.78597
														At1g30220	10632805	10635455	Complement	F12P21.2	sugar transporter familyprotein	4.77375	-1.1237	-1.56652	-1.39814	2.64157	-2.386	4.77375
														At5g37360	14822459	14825454	Complement	MNJ8.18	expressed protein	4.77282	-0.139007	-2.22675	-1.8491	3.75453	-2.01359	4.77282
														At2g38750	16203343	16205569	Complement	T6A23.5	annexin 4 (ANN4)	4.77024	-2.20676	-1.82715	-0.0748313	1.6179	-3.79531	4.77024
														At2g01110	83260	85229	Complement	F23H14.8	thylakoid membrane formationprotein / cpTatC (APG2)	4.76858	-0.550962	-2.57905	-1.13574	3.31156	-2.71691	4.76858
														At3g48600	18021106	18022361	Complement	T8P19.110	SWIB complex BAF60bdomain-containing protein	4.76683	-1.34623	-1.36127	-1.32462	2.38018	-2.41443	4.76683
														At2g03550	1077033	1078080	sense	T4M8.1	expressed protein	4.757	-0.999952	-4.23846	0.627271	2.81368	-4.72678	4.757
														At4g20110	10875299	10878740	sense	F18F4.210	vacuolar sorting receptorputative	4.75645	-1.39433	-0.565214	-1.95104	2.20966	-1.72421	4.75645
														At4g35060	16685725	16686708	Complement	M4E13.120	heavy-metal-associateddomain-containing protein / copper chaperone(CCH)-related	4.75088	-2.48632	1.84894	-3.84952	1.49774	-0.533742	4.75088
														At1g70820	26709180	26711926	sense	F15H11.7	phosphoglucomutase putative /glucose phosphomutase putative	4.75054	-1.40163	-2.88282	0.00740647	2.41316	-3.92658	4.75054
														At5g64240	25712846	25715046	sense	MSJ1.8	latex-abundant family protein(AMC3) / caspase family protein	4.74882	0.491557	-1.60583	-3.13403	4.55281	-0.919937	4.74882
														At1g56510	21171274	21175925	sense	F13N6.5	disease resistance protein(TIR-NBS-LRR class) putative	4.74354	-1.01572	-1.57464	-1.34872	2.62244	-2.30225	4.74354
														At5g27290	9617978	9620536	Complement	T21B4.200	expressed protein	4.74329	-0.992293	-2.69206	-0.483103	2.74847	-3.30596	4.74329
														At5g08650	2806324	2813227	Complement	MAH20.21	GTP-binding protein LepAputative	4.74028	-0.387283	-3.28311	-0.575353	3.37034	-3.15777	4.74028
														At3g26220	9597314	9599070	Complement	MTC11.14	cytochrome P450 family protein	4.73993	-1.49592	-1.15704	-1.50355	2.34043	-2.34698	4.73993
														At1g80130	30145855	30147538	Complement	F18B13.21	expressed protein	4.73952	-2.08684	0.26515	-2.3737	1.78191	-1.56206	4.73952
														At2g22980	9786419	9790258	sense	F21P24.4	serine carboxypeptidase S10family protein	4.73516	-0.00542224	-3.4752	-0.925805	3.9076	-2.90539	4.73516
														At1g30040	10537632	10539815	sense	T1P2.6	gibberellin 2-oxidase /GA2-oxidase (GA2OX2)	4.73051	-0.657935	-2.33506	-1.24776	3.19429	-2.6105	4.73051
														At5g02230	448132	450651	sense	T7H20.280	haloacid dehalogenase-likehydrolase family protein	4.72461	-2.76246	2.25042	-4.00471	1.26852	-0.421276	4.72461
														At4g10300	6384458	6386185	sense	F24G24.100	expressed protein	4.71817	-0.359491	-4.24809	0.0211885	3.47604	-3.92242	4.71817
														At2g04160	1401447	1407691	Complement	F3L12.2	subtilisin-like protease (AIR3)	4.71813	-3.60107	2.48872	-3.37093	0.666527	-0.844168	4.71813
														At4g16000	9063857	9064493	Complement	FCAALL.25	expressed protein	4.7137	-1.49173	-0.535012	-2.14024	2.33042	-1.77266	4.7137
														At5g22250	7365535	7366781	Complement	MWD9.3	CCR4-NOT transcription complexprotein putative	4.70855	-1.48078	-2.85456	0.117646	2.27437	-4.014	4.70855
														At1g69523	26133214	26134912	sense	F10D13.29	UbiE/COQ5 methyltransferasefamily protein	4.70241	-0.943536	-1.33542	-1.7506	2.76851	-2.00626	4.70241
														At1g18060	6211867	6213358	Complement	T10O22.3	expressed protein	4.7007	0.020861	-3.25522	-1.08758	3.90598	-2.70238	4.7007
														At5g16710	5483291	5485069	sense	F5E19.50	dehydroascorbate reductaseputative	4.69169	0.561727	-4.63	-0.642258	4.59593	-3.09784	4.69169
														At3g45540	16717297	16718634	Complement	F9K21.120	zinc finger (C3HC4-type RINGfinger) family protein	4.69076	-2.77844	1.15182	-2.4667	1.04011	-1.28362	4.69076
														At4g37310	17555921	17558887	Complement	AP22.74	cytochrome P450 putative	4.68222	-1.75535	-1.78605	-0.620667	2.08402	-3.19435	4.68222
														At5g01540	210978	213471	Complement	F7A7.60	lectin protein kinase putative	4.67517	-1.28525	-1.27593	-1.6037	2.54044	-2.25626	4.67517
														At5g02120	419088	419770	sense	T7H20.170	thylakoid membrane one helixprotein (OHP)	4.67291	0.223234	-4.33019	-0.483602	4.13712	-3.3214	4.67291
														At2g26690	11354225	11358071	Complement	F18A8.6	nitrate transporter (NTP2)	4.6636	-1.31776	0.742137	-3.76206	2.37977	-0.500435	4.6636
														At3g10460	3255805	3256444	sense	F13M14.26	self-incompatibilityprotein-related	4.66351	-1.63589	-1.72578	-0.622204	2.04815	-3.07295	4.66351
														At5g02020	386079	388120	Complement	T7H20.70	expressed protein	4.66074	-2.00084	1.84546	-4.38667	1.83875	-0.151583	4.66074
														At2g02390	628937	631113	sense	T16F16.18	glutathione S-transferase zeta1 (GSTZ1) (GST18)	4.6429	-1.97227	1.11826	-3.38747	1.76096	-0.71888	4.6429
														At1g27480	9544501	9546272	sense	F17L21.27	lecithin:cholesterolacyltransferase family protein / LACT family protein	4.64113	-0.0956595	-3.09484	-1.07151	3.72028	-2.68387	4.64113
														At3g24350	8837653	8839589	sense	K7M2.13	syntaxin putative (SYP32)	4.63667	-0.234623	-4.21471	-0.0400636	3.47684	-3.72467	4.63667
														At3g25160	9160175	9162074	Complement	MJL12.10	ER lumen protein retainingreceptor family protein	4.62347	-1.62773	-1.40829	-0.989256	2.09817	-2.71997	4.62347
														At2g27080	11571011	11574582	sense	T20P8.13	harpin-induced protein-related /HIN1-related / harpin-responsive protein-related	4.61088	-1.39701	-3.13841	0.32034	2.29949	-4.19886	4.61088
														At1g31190	11144753	11146911	sense	F28K20.15	inositol monophosphatase familyprotein	4.60638	-0.911238	-1.42316	-1.62587	2.73503	-2.05549	4.60638
														At1g21450	7508960	7511790	sense	F24J8.8	scarecrow-like transcriptionfactor 1 (SCL1)	4.60563	-2.17235	-0.929529	-0.819495	1.51705	-2.7877	4.60563
														At3g04070	1061533	1063101	Complement	T6K12.31	no apical meristem (NAM) familyprotein	4.60365	-2.42916	0.790192	-2.49882	1.40931	-1.3729	4.60365
														At4g31530	15282245	15284222	sense	F3L17.100	expressed protein	4.59454	0.0226445	-3.07666	-1.07083	3.76475	-2.52893	4.59454
														At3g54860	20335068	20340828	Complement	F28P10.160	vacuolar protein sortingprotein putative	4.59275	0.223144	-3.35746	-1.17465	4.07437	-2.58097	4.59275
														At5g54840	22293739	22295643	Complement	MBG8.10	GTP-binding family protein	4.59098	-0.400127	-1.19336	-2.40232	3.27187	-1.37875	4.59098
														At3g01440	168442	169625	sense	T13O15.8	oxygen evolving enhancer 3(PsbQ) family protein	4.59089	-0.157208	-3.04587	-0.976529	3.59233	-2.70839	4.59089
														At5g58650	23716934	23717452	Complement	MZN1.10	expressed protein	4.59082	-2.55793	-1.75201	0.208428	1.2952	-4.03997	4.59082
														At2g23840	10160877	10162680	Complement	T29E15.4	HNH endonucleasedomain-containing protein	4.58821	-1.00081	-1.30694	-1.64769	2.64071	-2.03447	4.58821
														At1g55480	20717350	20719200	sense	T5A14.12	expressed protein	4.57624	0.350757	-3.05461	-1.53611	4.2208	-2.2259	4.57624
														At2g39350	16436774	16439635	Complement	T16B24.1	ABC transporter family protein	4.57458	-4.13344	-0.0414086	-0.240811	0.243321	-3.54381	4.57458
														At3g03990	1033775	1034913	sense	T11I18.10	esterase/lipase/thioesterasefamily protein	4.56901	-2.35697	-1.20308	-0.546518	1.50924	-3.19894	4.56901
														At4g23290	12177748	12180836	Complement	F21P8.180	protein kinase family protein	4.56678	-1.09332	-1.24603	-1.42151	2.38832	-2.08126	4.56678
														At1g08450	2667836	2671822	Complement	T27G7.13	calreticulin 3 (CRT3)	4.55782	-0.407799	-3.53732	-0.194434	3.13498	-3.40943	4.55782
														At1g73110	27497901	27500539	Complement	F3N23.32	ribulose bisphosphatecarboxylase/oxygenase activase putative / RuBisCOactivase putative	4.55735	-0.729575	-3.30097	-0.0697584	2.79725	-3.59426	4.55735
														At4g27830	13861743	13864506	Complement	T27E11.70	glycosyl hydrolase family 1protein	4.54849	-1.44735	1.44625	-4.49851	2.16695	-0.0216618	4.54849
														At4g23496	12257689	12258421	Complement	F16G20.1	expressed protein	4.54655	-1.77781	-1.32941	-0.868671	1.91544	-2.78969	4.54655
														At4g02530	1112146	1114026	Complement	T10P11.17	chloroplast thylakoid lumenprotein	4.54451	-0.143864	-3.43487	-0.62421	3.5593	-3.01535	4.54451
														At1g66880	24950591	24959274	sense	F4N21.1	serine/threonine protein kinasefamily protein	4.54404	-1.47691	-2.15489	-0.36	2.15917	-3.31218	4.54404
														At3g11240	3518490	3521121	Complement	F11B9.16	arginine-tRNA-proteintransferase putative / arginyltransferase putative /arginyl-tRNA-protein transferase putative	4.5409	-2.09604	-1.71599	-0.196447	1.63003	-3.5075	4.5409
														At4g37000	17442606	17443844	sense	AP22.36	accelerated cell death 2 (ACD2)	4.53277	-0.208894	-2.92139	-1.00014	3.48873	-2.65197	4.53277
														At3g63490	23455190	23457820	sense	MAA21.120	ribosomal protein L1 familyprotein	4.53132	0.0781383	-1.70496	-2.52872	3.86146	-1.37712	4.53132
														At5g57960	23480024	23483726	Complement	MTI20.22	GTP-binding family protein	4.52836	-0.0104803	-3.11286	-0.927688	3.65695	-2.591	4.52836
														At2g21195	9090246	9090885	sense	F26H11.31	expressed protein	4.52742	-1.12323	-2.13489	-0.582117	2.37827	-2.96333	4.52742
														At1g73650	27691784	27693968	Complement	F25P22.29	expressed protein	4.523	-0.429787	-3.80399	0.0127501	3.06601	-3.64761	4.523
														At1g07640	2354351	2355984	Complement	F24B9.30	Dof-type zinc fingerdomain-containing protein	4.5213	-0.0796365	-2.65352	-1.31642	3.61593	-2.30366	4.5213
														At3g13570	4429305	4432129	Complement	K20M4.1	SC35-like splicing factor 30a kD(SCL30a)	4.51668	-2.31086	1.02218	-2.80384	1.43329	-1.07292	4.51668
														At1g63970	23742354	23744026	Complement	T12P18.1	2C-methyl-D-erythritol24-cyclodiphosphate synthase putative	4.50964	0.438491	-2.4152	-1.97391	4.27786	-1.59861	4.50964
														At5g42250	16911237	16914844	sense	K5J14.6	alcohol dehydrogenase putative	4.50336	-1.12061	-1.21101	-1.52646	2.4285	-2.05817	4.50336
														At3g19000	6553535	6555153	Complement	K13E13.13	oxidoreductase 2OG-Fe(II)oxygenase family protein	4.49271	-1.04296	-1.28664	-1.69532	2.63765	-2.04235	4.49271
														At1g07280	2238109	2241216	sense	F10K1.1	expressed protein	4.48733	-1.74208	0.795957	-3.16992	1.91725	-0.812056	4.48733
														At3g15720	5325297	5327544	Complement	MSJ11.12	glycoside hydrolase family 28protein / polygalacturonase (pectinase) family protein	4.48656	0.395071	-0.401186	-4.48211	4.19072	0.00283281	4.48656
														At2g37710	15821796	15824082	Complement	F13M22.21	lectin protein kinaseputative	4.48306	-1.54791	-2.91302	0.352003	2.09496	-4.13589	4.48306
														At1g13650	4680434	4682094	Complement	F21F23.9	expressed protein	4.47979	-1.05052	-1.42413	-1.36293	2.48422	-2.19249	4.47979
														At5g53970	21927771	21930003	sense	K19P17.14	aminotransferase putative	4.47499	-1.01773	0.36778	-3.45151	2.50438	-0.566692	4.47499
														At5g17860	5902396	5904382	Complement	MVA3.210	cation exchanger putative(CAX7)	4.47252	-4.04327	2.36576	-2.65351	0.241046	-1.2417	4.47252
														At5g56970	23062170	23065494	Complement	MHM17.8	FAD-binding domain-containingprotein / cytokinin oxidase family protein	4.46748	-2.87542	1.66225	-2.9428	0.987547	-0.951703	4.46748
														At1g22630	8003304	8004286	sense	F12K8.2	expressed protein	4.46567	-0.881673	-2.49072	-0.63189	2.72049	-2.987	4.46567
														At3g55170	20463891	20465316	Complement	T26I12.50	60S ribosomal protein L35(RPL35C)	4.46503	0.420128	-4.35105	-0.541566	4.20873	-3.11206	4.46503
														At3g04870	1342614	1347430	sense	T9J14.18	zeta-carotene desaturase (ZDS1)/ carotene 78-desaturase	4.45444	-0.743487	-1.42402	-1.81064	2.88734	-1.88988	4.45444
														At3g15350	5166213	5169527	sense	K7L4.15	glycosyltransferase family 14protein / core-2/I-branching enzyme family protein	4.45004	-0.842084	-0.457055	-2.49247	2.58814	-1.13412	4.45004
														At4g25650	13080914	13083206	Complement	L73G19.30	Rieske [2Fe-2S]domain-containing protein	4.44821	-1.58204	0.669649	-3.13061	1.98424	-0.782291	4.44821
														At3g46830	17257329	17259682	Complement	T6H20.140	Ras-related protein (RAB11A) /small GTP-binding protein putative	4.44331	-1.38607	-0.501878	-1.90828	2.10502	-1.65561	4.44331
														At2g21880	9331713	9333401	Complement	F7D8.20	Ras-related GTP-binding proteinputative	4.43975	-0.242672	-0.158151	-3.83275	3.38062	-0.346435	4.43975
														At3g48580	18018166	18019472	sense	T8P19.90	xyloglucan:xyloglucosyltransferase putative / xyloglucan endotransglycosylaseputative / endo-xyloglucan transferase putative	4.43578	-1.07726	-1.41847	-1.2931	2.40891	-2.21224	4.43578
														At4g34138	16348110	16349986	Complement	F28A23.3	UDP-glucoronosyl/UDP-glucosyltransferase family protein	4.43354	-3.42883	-1.22988	0.565913	0.545984	-4.38608	4.43354
														At1g09240	2984883	2986132	sense	T12M4.5	nicotianamine synthase putative	4.43327	-1.2377	-1.00239	-1.48132	2.201	-1.98583	4.43327
														At2g27420	11733222	11734692	Complement	F10A12.10	cysteine proteinase putative	4.43169	-1.36167	-1.28804	-1.20263	2.19095	-2.35515	4.43169
														At5g65840	26360956	26363289	Complement	K22J17.1	expressed protein	4.4314	0.00662506	-1.45304	-2.48791	3.63828	-1.22411	4.4314
														At5g23060	7736593	7738518	Complement	MYJ24.5	expressed protein	4.43134	0.341617	-3.6859	-0.843415	4.08348	-2.66963	4.43134
														At1g50020	18522758	18525363	Complement	F2J10.10	expressed protein	4.42965	-2.23288	1.20095	-3.02784	1.43593	-0.855206	4.42965
														At1g07700	2379644	2381357	sense	F24B9.21	thioredoxin family protein	4.4269	-0.759475	-3.0042	-0.301398	2.81505	-3.3138	4.4269
														At2g34460	14536687	14538037	sense	F13P17.33	flavin reductase-related	4.42083	0.542167	-3.32727	-1.39895	4.32729	-2.24373	4.42083
														At5g19850	6709361	6711675	Complement	T29J13.270	hydrolase alpha/beta foldfamily protein	4.4202	-0.212535	-2.04795	-1.63476	3.37594	-1.93209	4.4202
														At3g04640	1260912	1261689	Complement	F7O18.12	glycine-rich protein	4.41754	-0.523545	-2.05269	-1.42095	3.10566	-2.23315	4.41754
														At4g00050	17792	20066	sense	F6N15.11	basic helix-loop-helix (bHLH)family protein	4.41357	-1.5753	-2.30043	-0.0499761	1.98197	-3.5735	4.41357
														At1g70610	26625624	26630113	sense	F24J13.18	ABC transporter (TAP1)	4.41315	-1.41092	-0.118507	-2.27128	2.04715	-1.32961	4.41315
														At1g67470	25275845	25277239	sense	T1F15.6	protein kinase family protein	4.41295	-1.36231	-1.7452	-0.796508	2.21458	-2.77827	4.41295
														At3g10200	3157613	3160186	sense	F14P13.20	dehydration-responsiveprotein-related	4.41138	-0.765983	-1.92066	-1.26502	2.82618	-2.34821	4.41138
														At5g48790	19797086	19799266	Complement	K24G6.12	expressed protein	4.40628	0.165882	-4.09745	-0.392093	3.82194	-3.14919	4.40628
														At1g50450	18691453	18694039	Complement	F11F12.19	expressed protein	4.40238	-0.0697157	-3.11951	-0.813914	3.5116	-2.6678	4.40238
														At1g74640	28036424	28038434	sense	F1M20.32	expressed protein	4.40095	0.135167	-1.29648	-2.8822	3.80295	-0.978784	4.40095
														At1g74880	28133540	28134738	Complement	F25A4.15	expressed protein	4.39651	-0.417597	-3.03818	-0.569418	3.14972	-2.98863	4.39651
														At2g21280	9117394	9119776	Complement	F3K23.4	expressed protein	4.39611	0.404554	-3.87865	-0.784754	4.13686	-2.76519	4.39611
														At4g26700	13463662	13467605	sense	F10M23.40	fimbrin-like protein (FIM1)	4.39231	-1.54732	-1.0705	-1.2908	2.06624	-2.3154	4.39231
														At4g04500	2238409	2240863	sense	T26N6.11	protein kinase family protein	4.38798	-1.3104	-1.32044	-1.26775	2.27683	-2.32822	4.38798
														At1g77760	29240697	29244339	Complement	T32E8.9	nitrate reductase 1 (NR1)	4.38764	-2.63642	2.17389	-3.75691	1.17799	-0.391524	4.38764
														At1g67280	25191942	25194357	Complement	F1N21.10	lactoylglutathione lyaseputative / glyoxalase I putative	4.385	-0.231718	-2.21259	-1.42677	3.32108	-2.08872	4.385
														At3g55970	20777718	20780303	Complement	F27K19.150	oxidoreductase 2OG-Fe(II)oxygenase family protein	4.3805	0.0141517	-3.21081	-0.908893	3.65166	-2.66853	4.3805
														At3g59110	21865697	21869181	sense	F17J16.160	protein kinase family protein	4.37033	-3.87414	0.0279145	-0.351903	0.28005	-3.24848	4.37033
														At5g40500	16245062	16245839	sense	MNF13.2	expressed protein	4.36299	-0.199082	-3.40814	-0.478006	3.34789	-3.03808	4.36299
														At5g57930	23471830	23473719	sense	MTI20.19	expressed protein	4.35693	-0.448004	-4.09596	0.232049	3.12098	-3.89012	4.35693
														At3g15080	5074272	5076528	sense	K15M2.23	exonuclease family protein	4.3558	-0.0940738	-3.00921	-0.899726	3.47808	-2.60764	4.3558
														At2g01590	266648	267797	sense	F2I9.21	expressed protein	4.35498	-0.820376	-2.87254	-0.370707	2.78117	-3.24517	4.35498
														At5g59780	24099423	24100657	Complement	MTH12.19	myb family transcription factor(MYB59)	4.34576	-1.04938	-0.979915	-1.7338	2.40445	-1.78306	4.34576
														At4g19515	10640168	10642205	Complement	F24J7.1	disease resistance familyprotein	4.34445	-1.15949	-0.810637	-1.30772	1.89937	-1.76809	4.34445
														At2g46680	19172479	19174019	Complement	T3A4.6	homeobox-leucine zipper protein 7(HB-7) / HD-ZIP transcription factor 7	4.34247	-0.885693	-0.865009	-2.06754	2.59666	-1.52912	4.34247
														At5g08370	2690560	2693539	Complement	F8L15.100	alpha-galactosidase putative /melibiase putative / alpha-D-galactosidegalactohydrolase putative	4.33699	-0.84674	-2.24476	-0.730278	2.61818	-2.74638	4.33699
														At5g50920	20732698	20737597	Complement	K3K7.7	ATP-dependent Clp proteaseATP-binding subunit / ClpC	4.33504	-0.366792	-1.77102	-1.80365	3.21442	-1.84218	4.33504
														At1g14345	4899141	4899974	sense	F14L17.34	expressed protein	4.32885	0.278969	-3.90744	-0.618397	3.93249	-2.95684	4.32885
														At1g49380	18280375	18283196	sense	F13F21.19	cytochrome c biogenesis proteinfamily	4.32311	-0.117022	-3.01583	-0.837946	3.41189	-2.62889	4.32311
														At1g63880	23715939	23719787	Complement	T12P18.10	disease resistance protein(TIR-NBS-LRR class) putative	4.32178	-1.39084	-1.96748	-0.506185	2.13262	-3.01894	4.32178
														At1g07390	2269891	2274664	sense	F22G5.26	leucine-rich repeat familyprotein	4.31987	-1.23095	-1.63409	-0.833051	2.15994	-2.56912	4.31987
														At2g27500	11759267	11761029	Complement	F10A12.18	glycosyl hydrolase family 17protein	4.31303	-1.698	0.995494	-3.3976	1.9441	-0.607863	4.31303
														At5g01220	86584	89985	Complement	F7J8.200	UDP-sulfoquinovose:DAGsulfoquinovosyltransferase / sulfolipid synthase (SQD2)	4.30921	-0.899149	-2.88773	-0.198699	2.61726	-3.35809	4.30921
														At3g44600	16175922	16180249	Complement	F14L2.150	peptidyl-prolyl cis-transisomerase cyclophilin-type family protein	4.3078	-0.337	-3.76974	-0.0577237	3.17237	-3.4946	4.3078
														At3g56620	20983482	20985585	Complement	T5P19.270	integral membrane familyprotein / nodulin MtN21-related	4.3073	0.253307	-4.014	-0.491775	3.86967	-3.02196	4.3073
														At3g55600	20631661	20633449	sense	F1I16.10	expressed protein	4.30582	-3.01774	0.219333	-1.19949	0.843178	-2.37781	4.30582
														At4g30430	14878789	14880337	Complement	F17I23.230	senescence-associated familyprotein	4.30464	-2.01949	-1.75887	-0.0720156	1.55152	-3.47585	4.30464
														At1g64500	23956896	23958155	sense	F1N19.7	glutaredoxin family protein	4.30334	-0.938548	-2.57282	-0.459719	2.61674	-3.10509	4.30334
														At4g32980	15914725	15918047	Complement	F26P21.100	homeobox protein (ATH1)	4.30046	-1.84494	-2.19856	0.154658	1.70476	-3.74148	4.30046
														At1g36320	13673029	13675310	sense	F7F23.4	expressed protein	4.29919	-0.110373	-3.43393	-0.440095	3.32835	-2.93327	4.29919
														At1g45474	17181742	17183246	sense	F2G19.4	chlorophyll A-B binding proteinputative (LHCA5)	4.29486	0.214587	-3.81305	-0.589031	3.82506	-2.94102	4.29486
														At5g47070	19135770	19138136	Complement	MQD22.21	protein kinase putative	4.29359	0.330274	-0.937592	-3.46585	3.95608	-0.507083	4.29359
														At3g54620	20228875	20231370	Complement	T14E10.190	bZIP transcription factorfamily protein	4.28832	-0.381419	-1.82411	-1.51932	3.04634	-1.90202	4.28832
														At4g34350	16428484	16431117	Complement	F10M10.120	LytB family protein	4.28337	0.305898	-2.58043	-1.60833	3.91635	-1.87296	4.28337
														At2g22970	9781933	9785606	sense	F21P24.3	serine carboxypeptidase S10family protein	4.25813	0.118982	-1.54046	-2.28889	3.62137	-1.19553	4.25813
														At1g13260	4542165	4543739	sense	T6J4.2	DNA-binding protein RAV1 (RAV1)	4.25277	-2.28678	-1.00345	-0.565624	1.35276	-2.9381	4.25277
														At5g49450	20069055	20069961	sense	K7J8.13	bZIP family transcription factor	4.25175	-0.958182	0.260616	-3.24623	2.47411	-0.609231	4.25175
														At2g48030	19654597	19657218	Complement	T9J23.18	endonuclease/exonuclease/phosphatase family protein	4.25141	-1.19412	-2.06956	-0.57218	2.28453	-2.91073	4.25141
														At5g52780	21408099	21408700	Complement	F6N7.27	expressed protein	4.2477	-0.598522	-3.79595	0.239581	2.89657	-3.81484	4.2477
														At3g24110	8704436	8705420	Complement	MUJ8.1	calcium-binding EF hand familyprotein	4.24362	-1.49833	-1.95017	-0.367182	1.98915	-3.11545	4.24362
														At2g03310	1006253	1007180	Complement	T18E12.6	expressed protein	4.24285	-0.919275	-1.11934	-1.72617	2.52125	-1.78394	4.24285
														At3g10940	3422083	3423445	Complement	F9F8.24	protein phosphatase-related	4.24225	-1.29843	-1.42504	-0.816621	1.97623	-2.46834	4.24225
														At5g38660	15490363	15492765	Complement	MBB18.21	expressed protein	4.24104	0.046198	-3.12892	-0.890013	3.57713	-2.57441	4.24104
														At1g75690	28425771	28426880	Complement	F10A5.12	chaperone protein dnaJ-related	4.23889	0.269087	-3.95764	-0.471524	3.83227	-2.94418	4.23889
														At1g23010	8147253	8149801	sense	F19G10.5	multi-copper oxidase type Ifamily protein	4.23637	0.032011	-3.13143	-0.851064	3.52635	-2.56351	4.23637
														At2g26080	11116098	11120906	Complement	T19L18.11	glycine dehydrogenase[decarboxylating] putative / glycine decarboxylaseputative / glycine cleavage system P-protein putative	4.23591	-1.49986	-2.26941	-0.0153004	1.92017	-3.47096	4.23591
														At1g31170	11133470	11134386	sense	F28K20.12	parB-like nucleasedomain-containing protein	4.23132	-0.886042	-1.28283	-1.53391	2.51134	-1.90572	4.23132
														At4g31390	15233081	15237115	sense	F8F16.210	ABC1 family protein	4.22225	-1.18332	0.014393	-2.65038	2.23912	-1.01527	4.22225
														At4g32770	15804956	15807987	sense	F4D11.30	tocopherol cyclase chloroplast/ vitamin E deficient 1 (VTE1) / sucrose export defective1 (SXD1)	4.22053	-1.04946	-0.45701	-2.31939	2.41497	-1.31224	4.22053
														At2g01890	396808	399207	Complement	T23K3.8	purple acid phosphataseputative	4.22015	-0.390403	-1.31795	-2.00919	3.01539	-1.47467	4.22015
														At5g42310	16933011	16936156	sense	K5J14.11	pentatricopeptide (PPR)repeat-containing protein	4.20758	-0.0537142	-3.67633	-0.364979	3.4397	-3.10445	4.20758
														At2g32140	13662707	13664110	Complement	F22D22.11	disease resistance protein (TIRclass) putative	4.20578	-1.49975	-0.991392	-1.17285	1.89614	-2.21259	4.20578
														At2g38170	15996161	16000354	Complement	F16M14.10	calcium exchanger (CAX1)	4.20463	-1.15226	-0.0209864	-2.5928	2.22206	-1.02032	4.20463
														At1g76600	28751782	28752739	sense	F14G6.20	expressed protein	4.19892	-0.801255	-1.64652	-1.33227	2.64101	-2.14165	4.19892
														At2g18690	8104504	8105909	sense	MSF3.7	expressed protein	4.19877	-1.30631	-1.12269	-1.30956	2.13856	-2.14625	4.19877
														At2g22470	9545277	9545959	Complement	F14M13.13	arabinogalactan-protein (AGP2)	4.19456	0.471584	-1.81364	-2.52537	4.05029	-1.10481	4.19456
														At2g45760	18854081	18854895	Complement	F4I18.26	BON1-associated protein(BAP1)-related	4.19391	-1.13144	-0.946066	-1.48344	2.15928	-1.83967	4.19391
														At4g36410	17201930	17202988	sense	AP22.89	ubiquitin-conjugating enzyme 17(UBC17)	4.19065	0.0965731	-1.60415	-2.27714	3.57689	-1.26975	4.19065
														At5g62790	25231351	25234665	Complement	MQB2.90	1-deoxy-D-xylulose 5-phosphatereductoisomerase (DXR)	4.1888	0.303344	-4.11319	-0.389098	3.82615	-2.98515	4.1888
														At5g13720	4427844	4429136	sense	MSH12.19	expressed protein	4.1846	0.162023	-1.89229	-2.11843	3.67139	-1.45414	4.1846
														At1g51800	19217817	19221639	sense	F19C24.3	leucine-rich repeat proteinkinase putative	4.16903	-1.10229	-1.18629	-1.42781	2.30175	-2.0116	4.16903
														At1g55910	20909799	20911078	sense	F14J16.16	metal transporter putative(ZIP11)	4.16151	-0.664797	-2.19964	-0.859278	2.69637	-2.50654	4.16151
														At1g10340	3390324	3392573	Complement	F14N23.22	ankyrin repeat family protein	4.16125	-1.19827	-1.08015	-1.35248	2.14804	-2.01522	4.16125
														At3g14620	4914921	4917083	sense	MIE1.12	cytochrome P450 putative	4.15522	-0.769444	-2.86525	-0.260188	2.65962	-3.18938	4.15522
														At2g32480	13795594	13797150	Complement	T26B15.4	membrane-associated zincmetalloprotease putative	4.14999	-0.339498	-2.85852	-0.439572	2.88083	-2.76217	4.14999
														At2g32190	13681594	13682362	sense	F22D22.6	expressed protein	4.14968	-3.2811	2.77483	-3.50205	0.519448	-0.390959	4.14968
														At4g00330	142622	144523	Complement	F5I10.8	protein kinase family protein	4.14837	-1.02555	-1.66175	-1.05174	2.38535	-2.37002	4.14837
														At1g80310	30199510	30201446	sense	F5I6.6	expressed protein	4.14535	-1.31121	-0.542537	-1.89037	2.11811	-1.61972	4.14535
														At3g06510	2016443	2019680	sense	F5E6.16	glycosyl hydrolase family 1protein	4.14353	-2.15725	-1.94054	0.341016	1.32902	-3.84616	4.14353
														At3g22860	8090661	8093146	Complement	F5N5.5	eukaryotic translation initiationfactor 3 subunit 8 putative / eIF3c putative	4.14258	-0.483527	-2.91361	-0.468055	2.91875	-2.94062	4.14258
														At5g20935	7103473	7104023	sense	F22D1.5	expressed protein	4.14187	-0.0331635	-2.46489	-1.26731	3.37802	-2.09702	4.14187
														At2g05940	2287235	2289304	Complement	T6P5.14	protein kinase putative	4.14066	0.0715423	-2.46164	-1.47078	3.54183	-2.0093	4.14066
														At2g43290	17998129	17999124	Complement	T1O24.3	calmodulin-like protein (MSS3)	4.13546	-1.04483	-2.25209	-0.507515	2.38131	-2.92014	4.13546
														At1g60190	22202068	22204343	sense	T13D8.8	armadillo/beta-catenin repeatfamily protein / U-box domain-containing protein	4.13346	-0.601684	0.611517	-4.11605	2.78111	-0.00453517	4.13346
														At2g35410	14905407	14906829	sense	T32F12.21	33 kDa ribonucleoproteinchloroplast putative / RNA-binding protein cp33putative	4.13275	-0.0705648	-3.19359	-0.692398	3.38682	-2.75044	4.13275
														At1g77490	29122504	29125109	sense	T5M16.8	L-ascorbate peroxidasethylakoid-bound (tAPX)	4.12994	0.430769	-3.69416	-0.780066	3.94719	-2.62215	4.12994
														At5g42390	16962479	16970328	sense	MDH9.8	metalloendopeptidase	4.10412	-0.907418	-0.340583	-2.4446	2.41228	-1.08599	4.10412
														At1g04800	1348451	1349285	Complement	F13M7.21	glycine-rich protein	4.10168	-1.46968	-0.590462	-1.52266	1.846	-1.81163	4.10168
														At3g17770	6081677	6085963	Complement	MIG5.7	dihydroxyacetone kinase familyprotein	4.10068	-0.806988	0.358074	-3.48149	2.58415	-0.395438	4.10068
														At4g14400	8294448	8298598	sense	FCAALL.190	ankyrin repeat family protein	4.10011	-1.10092	-1.206	-1.30893	2.22324	-2.03768	4.10011
														At2g37240	15647018	15648842	Complement	F3G5.3	expressed protein	4.09559	-0.826365	-0.22402	-2.64857	2.47437	-0.912985	4.09559
														At2g22360	9504675	9507695	sense	F14M13.24	DNAJ heat shock family protein	4.08929	-0.829344	-1.34903	-1.49347	2.51595	-1.90279	4.08929
														At1g21410	7497130	7499567	sense	F24J8.5	F-box family protein	4.08063	-2.49596	0.549096	-1.76319	1.02729	-1.63964	4.08063
														At2g32800	13923529	13926629	sense	F24L7.6	protein kinase family protein	4.07769	-1.01869	-1.33461	-1.29986	2.32274	-2.06929	4.07769
														At3g45830	16852262	16856526	sense	F16L2.40	expressed protein	4.07393	-1.14212	-1.08581	-1.42221	2.20561	-1.95881	4.07393
														At4g20830	11155464	11157728	sense	F21C20.180	FAD-binding domain-containingprotein	4.06823	-0.225522	-2.35835	-1.17649	3.15554	-2.21107	4.06823
														At1g26230	9072375	9075266	Complement	F28B23.11	chaperonin putative	4.06082	-0.932205	-2.7033	-0.081379	2.3413	-3.26052	4.06082
														At1g59700	21940094	21941624	sense	T30E16.30	glutathione S-transferaseputative	4.05294	-1.85998	1.24959	-3.2175	1.54068	-0.523953	4.05294
														At4g11890	7148242	7149915	sense	T26M18.100	protein kinase family protein	4.05073	-1.14524	-1.10774	-1.36115	2.17398	-1.98462	4.05073
														At1g69840	26297331	26299444	Complement	T17F3.13	band 7 family protein	4.04545	-0.451082	-2.71356	-0.504006	2.79518	-2.74337	4.04545
														At4g32340	15612597	15614259	Complement	F8B4.40	expressed protein	4.04299	-1.12103	-2.98035	0.287222	2.22315	-3.70636	4.04299
														At5g58870	23787038	23791006	Complement	K19M22.17	FtsH protease putative	4.04114	-0.437866	-1.79445	-1.31628	2.8129	-1.9348	4.04114
														At5g61410	24700832	24703331	Complement	MFB13.21	ribulose-phosphate 3-epimerasechloroplast putative / pentose-5-phosphate 3-epimeraseputative	4.03973	0.265234	-2.83848	-1.1927	3.66756	-2.11287	4.03973
														At3g27840	10324591	10325187	sense	K16N12.20	50S ribosomal protein L12-2chloroplast (CL12-B)	4.03831	-2.29828	-0.0234442	-1.30657	1.14454	-1.99956	4.03831
														At4g33950	16272324	16274815	sense	F17I5.140	protein kinase putative	4.03447	-1.49425	-0.399199	-1.61066	1.74506	-1.65833	4.03447
														At1g35140	12851975	12853103	sense	T32G9.32	phosphate-responsive proteinputative	4.03173	-3.07545	-0.00997243	-0.724617	0.633888	-2.64687	4.03173
														At2g32680	13866846	13869691	Complement	F24L7.18	disease resistance familyprotein	4.01897	-1.3008	-0.915342	-1.42181	2.04616	-1.94749	4.01897
														At2g46690	19187800	19188537	sense	T3A4.7	auxin-responsive family protein	4.01885	-1.0861	-1.23062	-1.2271	2.16414	-2.04388	4.01885
														At5g46780	18996204	18997284	sense	MZA15.20	VQ motif-containing protein	4.01641	-0.911581	-2.46011	-0.228176	2.27546	-3.01771	4.01641
														At3g18860	6501688	6508542	sense	MCB22.3	transducin family protein / WD-40repeat family protein	4.01574	0.0500781	-3.11388	-0.74759	3.39703	-2.54707	4.01574
														At4g14210	8190256	8195095	Complement	FCAALL.28	phytoene dehydrogenasechloroplast / phytoene desaturase (PDS)	4.0128	-0.507704	-1.93033	-1.18465	2.78038	-2.1176	4.0128
														At5g57710	23402020	23405579	sense	MRI1.7	heat shock protein-related	4.00925	-0.150676	-3.02499	-0.660853	3.20633	-2.69274	4.00925
														At2g33590	14231344	14233678	sense	F4P9.36	cinnamoyl-CoA reductase family	4.00492	-1.71958	-2.06036	0.144033	1.60555	-3.49405	4.00492
														At1g16080	5514311	5516012	sense	T24D18.18	expressed protein	3.99253	-0.425544	-3.1118	-0.28599	2.89856	-3.04691	3.99253
														At3g62920	23271692	23272268	sense	T20O10.20	expressed protein	3.99189	-2.3062	1.19563	-2.59825	1.13531	-0.930061	3.99189
														At5g44870	18131893	18135835	sense	K21C13.4	disease resistance protein(TIR-NBS-LRR class) putative	3.99175	-0.968496	-2.32022	-0.404879	2.33971	-2.90806	3.99175
														At1g76570	28734026	28735719	sense	F14G6.17	chlorophyll A-B binding familyprotein	3.99058	-0.388607	-2.20612	-1.09999	2.924	-2.23198	3.99058
														At4g33470	16102598	16105484	Complement	F17M5.230	histone deacetylase familyprotein	3.99008	-0.143111	-3.36461	-0.356516	3.17071	-2.94805	3.99008
														At3g05200	1476988	1478736	sense	T12H1.17	zinc finger (C3HC4-type RINGfinger) family protein (ATL6)	3.98774	-1.21161	-0.912293	-1.48185	2.09608	-1.86321	3.98774
														At5g56090	22731744	22734061	sense	MDA7.15	cytochrome oxidase assemblyfamily protein	3.98091	0.415731	-3.40861	-0.866155	3.80128	-2.38905	3.98091
														At5g01410	172317	173613	Complement	T10O8.120	stress-responsive proteinputative	3.9723	-1.16538	-0.18138	-2.35321	2.18282	-1.17066	3.9723
														At5g27350	9648670	9654429	sense	F21A20.60	sugar-porter family protein 1(SFP1)	3.97156	-2.37634	-0.391107	-0.766395	0.999792	-2.42817	3.97156
														At2g47890	19615066	19616702	sense	F17A22.28	zinc finger (B-box type) familyprotein	3.97085	-1.85982	-0.187031	-1.53135	1.48151	-1.78093	3.97085
														At4g00895	381788	382643	sense	T18A10.28	ATP synthase deltachain-related	3.96961	-0.604832	-1.89942	-1.14685	2.68837	-2.17423	3.96961
														At5g57520	23313195	23313909	sense	MUA2.9	zinc finger (C2H2 type) familyprotein (ZFP2)	3.96925	-1.2997	-1.38514	-0.876128	1.97257	-2.38476	3.96925
														At2g47800	19582014	19587647	sense	F17A22.19	glutathione-conjugatetransporter (MRP4)	3.96916	-3.67162	2.62231	-2.80786	0.165862	-0.796026	3.96916
														At5g57050	23104461	23106853	sense	MHM17.19	protein phosphatase 2C ABI2 /PP2C ABI2 / abscisic acid-insensitive 2 (ABI2)	3.96815	-1.98013	-0.43654	-1.1532	1.37639	-2.11823	3.96815
														At1g02475	513916	515343	Complement	T14P4.36	expressed protein	3.96688	0.055909	-2.25499	-1.24275	3.29702	-1.83821	3.96688
														At2g41250	17207737	17209696	Complement	F13H10.20	haloacid dehalogenase-likehydrolase family protein	3.96622	-0.396865	-1.22916	-1.95691	2.85612	-1.40256	3.96622
														At1g49970	18505201	18508277	Complement	F2J10.14	ATP-dependent Clp proteaseproteolytic subunit (ClpR1) (nClpP5)	3.95934	0.286373	-1.66356	-2.2074	3.62302	-1.14648	3.95934
														At2g36950	15522212	15524010	sense	T1J8.13	heavy-metal-associateddomain-containing protein	3.95907	-3.62668	0.118303	-0.330563	0.184526	-2.96158	3.95907
														At5g40890	16398574	16402547	Complement	MHK7.12	chloride channel protein (CLC-a)	3.95842	0.0586357	-3.75596	-0.246057	3.38081	-3.05886	3.95842
														At4g27654	13811651	13812132	sense	T29A15.2	expressed protein	3.9554	-1.47861	-1.38981	-0.715421	1.82728	-2.55568	3.9554
														At1g23400	8312065	8314733	Complement	F28C11.4	expressed protein	3.95479	-0.287127	-3.30694	-0.201872	2.95455	-3.05326	3.95479
														At5g53420	21690756	21692959	sense	MYN8.3	expressed protein	3.95417	-2.22887	-1.64431	0.244788	1.17027	-3.5736	3.95417
														At5g17650	5816700	5818349	Complement	K10A8.130	glycine/proline-rich protein	3.95337	-2.72494	1.88821	-2.92303	0.808393	-0.681716	3.95337
														At1g62780	23252844	23254770	Complement	F23N19.15	expressed protein	3.95287	-0.34798	-3.38115	-0.0932033	2.91618	-3.19552	3.95287
														At1g10760	3581035	3590044	Complement	F20B24.24	starch excess protein (SEX1)	3.95081	-1.00087	-1.18262	-1.27926	2.17857	-1.92624	3.95081
														At1g68620	25769610	25770903	sense	F24J5.14	expressed protein	3.94957	-2.23238	-0.617661	-0.709559	1.14556	-2.52046	3.94957
														At1g64280	23856411	23859229	Complement	F15H21.6	regulatory protein (NPR1)	3.94932	0.354278	-1.98308	-2.022	3.69977	-1.34596	3.94932
														At1g04640	1292079	1293356	sense	T1G11.11	biotin/lipoate A/B proteinligase family protein	3.94268	-0.841991	-2.70001	-0.151374	2.41302	-3.12825	3.94268
														At1g28230	9862060	9864593	Complement	F3H9.22	purine permease (PUP1)	3.94219	-1.87886	-0.649457	-1.06288	1.48581	-2.2248	3.94219
														At4g28025	13935641	13937388	Complement	T13J8.2	expressed protein	3.94191	0.137915	-1.78031	-1.96021	3.44246	-1.3863	3.94191
														At5g62720	25209068	25212235	sense	MRG21.13	integral membrane HPP familyprotein	3.94149	-0.413559	-2.1029	-1.12857	2.86254	-2.1706	3.94149
														At4g04490	2231955	2234636	Complement	T26N6.10	protein kinase family protein	3.93898	-1.06006	-1.06848	-1.35373	2.13525	-1.87374	3.93898
														At5g08410	2709849	2710584	Complement	F8L15.14	ferredoxin-thioredoxinreductase putative	3.93809	-0.322023	-1.391	-1.94189	2.96876	-1.47306	3.93809
														At1g72430	27268573	27269292	Complement	T10D10.10	auxin-responsiveprotein-related	3.93278	-0.375086	-2.98652	-0.352329	2.85527	-2.88496	3.93278
														At5g24260	8234726	8238246	Complement	MOP9.8	prolyl oligopeptidase familyprotein	3.93175	-1.21773	-0.479442	-1.89094	2.06149	-1.48079	3.93175
														At1g78510	29540178	29542310	Complement	T30F21.15	solanesyl diphosphate synthase(SPS)	3.92944	0.180726	-2.08331	-1.75145	3.4906	-1.59788	3.92944
														At2g15020	6498516	6500434	Complement	T15J14.6	expressed protein	3.92089	-1.1629	-0.970546	-1.37602	2.0566	-1.87456	3.92089
														At5g04340	1216132	1217107	Complement	T19N18.70	zinc finger (C2H2 type) familyprotein	3.91483	-3.66552	3.21252	-3.36875	0.140286	-0.364538	3.91483
														At1g54520	20367115	20369706	sense	F20D21.34	expressed protein	3.91258	-0.150648	-1.10155	-2.32538	3.08479	-1.07226	3.91258
														At4g29590	14512555	14514449	Complement	T16L4.100	expressed protein	3.91114	0.338374	-2.71714	-1.21442	3.65135	-1.92676	3.91114
														At5g54290	22068263	22071604	sense	MDK4.11	cytochrome c biogenesis proteinfamily	3.91009	-0.164927	-2.47985	-1.03204	3.10378	-2.24918	3.91009
														At2g21960	9361999	9364499	sense	F7D8.28	expressed protein	3.90718	0.528382	-3.48737	-0.855497	3.89002	-2.34366	3.90718
														At5g54960	22327913	22329987	Complement	MBG8.23	pyruvate decarboxylase putative	3.90538	-1.44676	-1.42196	-0.679649	1.82258	-2.55547	3.90538
														At5g55570	22531756	22532486	Complement	MWC10.2	expressed protein	3.90091	-1.14211	-1.12901	-1.23622	2.07512	-1.99953	3.90091
														At1g22690	8027294	8028114	sense	T22J18.14	gibberellin-responsive proteinputative	3.89873	-1.1119	-0.993731	-1.31119	2.03187	-1.85816	3.89873
														At4g38225	17927192	17928888	sense	F20D10.9	expressed protein	3.89778	-0.698296	-1.91645	-0.862371	2.44749	-2.29207	3.89778
														At1g35230	12917127	12917741	sense	T9I1.2	arabinogalactan-protein (AGP5)	3.88824	-1.6826	-0.045492	-1.82892	1.61006	-1.49867	3.88824
														At1g67840	25437765	25440738	sense	F12A21.3	ATP-binding region ATPase-likedomain-containing protein	3.882	-0.0268386	-2.93739	-0.732321	3.20917	-2.48026	3.882
														At5g51020	20762680	20764472	Complement	K3K7.20	expressed protein	3.87683	-0.461775	-1.27293	-1.58022	2.59666	-1.507	3.87683
														At4g35600	16896242	16898881	sense	F8D20.110	protein kinase family protein	3.87443	-0.129095	-2.4314	-1.07223	3.10478	-2.17122	3.87443
														At3g52155	19354673	19355827	sense	F4F15.1	expressed protein	3.8656	-0.570469	-1.78577	-1.11588	2.588	-2.05622	3.8656
														At1g21910	7696525	7697688	sense	T26F17.14	AP2 domain-containingtranscription factor family protein	3.86224	-1.2144	-2.08255	-0.195001	1.93527	-2.97901	3.86224
														At4g18740	10303425	10304583	Complement	F28A21.150	expressed protein	3.85923	-1.25004	-1.00721	-1.17723	1.91737	-1.9953	3.85923
														At5g04980	1468576	1470589	Complement	MUG13.16	endonuclease/exonuclease/phosphatase family protein	3.85886	-1.11517	-1.07078	-1.03342	1.86337	-1.95415	3.85886
														At1g74710	28073956	28077804	sense	F1M20.39	isochorismate synthase 1 (ICS1)/ isochorismate mutase	3.85489	-1.02078	-1.44441	-0.870856	2.04553	-2.20233	3.85489
														At5g42070	16836215	16837423	Complement	MJC20.18	expressed protein	3.84994	0.104586	-3.25273	-0.58833	3.34008	-2.61441	3.84994
														At4g28490	14077863	14081177	sense	F20O9.180	leucine-rich repeattransmembrane protein kinase putative	3.84695	-2.59857	0.944585	-1.94053	0.835567	-1.37613	3.84695
														At5g14970	4847281	4848868	sense	F2G14.90	expressed protein	3.84552	-0.493881	-1.01812	-1.98888	2.67704	-1.31008	3.84552
														At1g77090	28965291	28966816	Complement	F22K20.16	thylakoid lumenal 29.8 kDaprotein	3.84551	-0.313914	-2.8266	-0.470904	2.85918	-2.69729	3.84551
														At2g23610	10051259	10053612	Complement	F26B6.26	esterase putative	3.84484	-1.28	-2.21715	-0.0173241	1.87907	-3.17426	3.84484
														At1g28380	9963579	9966306	sense	F3M18.18	expressed protein	3.84409	-1.70155	-2.09763	0.219325	1.57127	-3.46313	3.84409
														At5g41790	16745606	16750004	sense	K16L22.7	COP1-interactive protein 1 /CIP1	3.83755	-0.665304	-0.728293	-2.13614	2.51586	-1.20914	3.83755
														At5g61670	24800764	24803171	sense	K11J9.20	expressed protein	3.83713	-3.71568	-0.110373	0.0595722	0.0426599	-3.22974	3.83713
														At5g44650	18030376	18032630	sense	K15C23.10	expressed protein	3.836	0.178598	-2.58477	-1.22085	3.41085	-2.00537	3.836
														At1g32520	11758351	11759252	Complement	F5D14.31	expressed protein	3.83562	-1.03964	-1.69091	-0.68579	2.07417	-2.43244	3.83562
														At1g19740	6824313	6825450	sense	F6F9.20	ATP-dependent protease La (LON)domain-containing protein	3.83525	0.286151	-3.12199	-0.871195	3.52987	-2.32483	3.83525
														At2g30170	12886757	12888575	Complement	T27E13.9	expressed protein	3.83213	-0.919997	-2.18348	-0.385701	2.21135	-2.76162	3.83213
														At1g51090	18936605	18937618	sense	F23H24.15	heavy-metal-associateddomain-containing protein	3.82438	-0.560886	-2.16731	-0.777355	2.57475	-2.36662	3.82438
														At2g38465	16113341	16113978	Complement	T19C21.3	expressed protein	3.82383	-0.428237	-0.515357	-2.5981	2.71883	-0.814632	3.82383
														At1g07610	2341539	2342120	sense	F24B9.33	metallothionein-like protein 1C(MT-1C)	3.82207	-2.61591	1.31579	-2.21468	0.69509	-0.986937	3.82207
														At4g04770	2427798	2429848	Complement	T4B21.16	ATP-binding-cassette transporter(ABC1)	3.81713	-0.97381	-1.41261	-1.03911	2.1594	-2.1061	3.81713
														At3g05640	1640399	1643139	Complement	F18C1.9	protein phosphatase 2C putative/ PP2C putative	3.81701	-0.690885	0.781386	-3.91113	2.49259	0.0644446	0
														At1g79600	29954839	29957583	Complement	F20B17.3	ABC1 family protein	3.82274	0.860898	-0.418095	-4.45216	4.19508	0.389658	0
														At5g45800	18592809	18596324	Complement	MRA19.24	leucine-rich repeattransmembrane protein kinase putative	3.84251	-0.586239	-5.41284	1.60036	2.61754	-5.15971	0
														At5g35170	13436396	13440976	sense	T25C13.50	adenylate kinase familyprotein	3.86136	0.851394	-4.48803	-0.48808	4.27181	-2.68421	0
														At3g28310	10578198	10578612	sense	MZF16.11	expressed protein	3.87858	1.45633	-2.32018	-2.91496	4.98754	-0.663615	0
														At1g52890	19700672	19702140	Complement	F14G24.16	no apical meristem (NAM) familyprotein	3.88451	-1.59339	3.01725	-5.83263	1.70535	1.06941	0
														At4g15630	8917428	8918850	sense	FCAALL.230	integral membrane familyprotein	3.88771	-2.80639	-3.16806	2.16693	0.710995	-6.15882	0
														At1g61520	22703675	22705048	sense	T25B24.12	chlorophyll A-B binding protein/ LHCI type III (LHCA3.1)	3.89505	0.291335	-5.35441	0.666434	3.59251	-4.01382	0
														At1g29070	10149777	10151344	sense	F28N24.22	ribosomal protein L34 familyprotein	3.89712	0.847229	-8.18155	1.21091	4.25292	-4.71496	0
														At3g45610	16750274	16751430	Complement	F9K21.190	Dof-type zinc fingerdomain-containing protein	3.89754	0.0262162	-5.88925	1.11562	3.28413	-4.61063	0
														At1g80050	30116407	30118217	Complement	F18B13.14	adeninephosphoribosyltransferase 2 (APT2)	3.90398	-1.9996	-3.69554	1.82539	1.30443	-5.82812	0
														At5g12940	4087715	4089007	sense	T24H18.110	leucine-rich repeat familyprotein	3.91444	-2.0809	-2.91993	1.24751	1.29179	-4.79353	0
														At3g23800	8581661	8583842	sense	MYM9.16	selenium-binding family protein	3.91611	2.9752	-3.05039	-3.89134	7.43188	-0.0116921	0
														At3g07250	2300585	2308311	Complement	T1B9.9	nuclear transport factor 2 (NTF2)family protein / RNA recognition motif (RRM)-containingprotein	3.91832	-1.24458	-3.05856	0.586255	1.95866	-3.96589	0
														At4g15490	8852696	8854543	Complement	FCAALL.17	UDP-glucoronosyl/UDP-glucosyltransferase family protein	3.92148	-2.94708	3.93043	-4.95743	0.66354	0.641507	0
														At3g26614	9786127	9788808	Complement	MFE16.16	non-LTR retrotransposon family(LINE)has a 3.0e-39 P-value blast match to GB:NP_038607 L1repeat Tf subfamily member 9 (LINE-element) [Musmusculus]	3.92444	0.891568	-7.27458	0.952691	4.31376	-4.38267	0
														At4g02770	1229111	1229945	Complement	T5J8.7	photosystem I reaction centersubunit II chloroplast putative / photosystem I 20 kDasubunit putative / PSI-D putative (PSAD1)	3.92601	0.605144	-5.27722	0.241661	3.98115	-3.55948	0
														At1g20620	7143073	7146477	sense	F2D10.40	catalase 3 (SEN2)	3.92794	-0.357588	-5.70112	1.44416	2.90692	-5.05789	0
														At2g47270	19418630	19419221	Complement	T8I13.11	expressed protein	3.93666	1.36881	-1.11766	-4.30124	4.93746	0.232113	0
														At3g26030	9518550	9520796	sense	MPE11.23	serine/threonine proteinphosphatase 2A (PP2A) regulatory subunit B' putative	3.93855	0.918033	-5.59029	0.0651393	4.39525	-3.36754	0
														At5g54380	22094318	22097106	Complement	MDK4.1	protein kinase family protein	3.94209	1.29046	-2.95773	-2.15345	4.86857	-1.27806	0
														At4g23680	12336196	12337486	Complement	F9D16.150	major latex protein-related /MLP-related	3.95449	2.60397	-9.29609	0.10479	6.70506	-3.44079	0
														At1g03600	898875	899654	sense	F21B7.21	photosystem II family protein	3.96378	0.998443	-5.6156	0.0532738	4.47728	-3.38915	0
														At3g43510	15414860	15416366	Complement	T18D12.80	copia-like retrotransposonfamilyhas a 2.3e-11 P-value blast match to GB:BAA11674 ORF(AA1-1338) (Ty1_Copia-element) [Nicotiana tabacum]	3.97128	-0.505055	-4.64393	0.894506	2.73982	-4.42305	0
														At1g29395	10288236	10289579	Complement	F15D2.29	stress-responsive proteinputative	3.97441	1.4497	-0.308804	-6.07267	5.2958	0.979163	0
														At2g24280	10340364	10344161	sense	F27D4.19	serine carboxypeptidase S28family protein	3.97966	-1.37103	-3.15446	0.682672	2.00026	-4.10247	0
														At4g28660	14149922	14151103	sense	T5F17.110	photosystem II reaction centreW (PsbW) family protein	3.99267	1.21176	-4.15183	-1.13708	4.82048	-2.1909	0
														At3g47620	17569834	17571752	sense	F1P2.170	TCP family transcription factorputative	4.00227	0.011597	-4.68295	0.417612	3.36199	-3.82362	0
														At4g15620	8913840	8915658	sense	FCAALL.348	integral membrane familyprotein	4.00788	-2.58103	-3.08299	1.78267	0.959648	-5.65745	0
														At3g56170	20853556	20855437	sense	F18O21.130	Ca(2+)-dependent nuclease	4.0144	-0.862759	2.73854	-6.79786	2.5108	1.5209	0
														At1g15820	5446123	5447776	Complement	F7H2.16	chlorophyll A-B binding proteinchloroplast (LHCB6)	4.01915	1.61352	-7.33532	0.19471	5.36363	-3.58404	0
														At3g51570	19137337	19141435	sense	F26O13.210	disease resistance protein(TIR-NBS-LRR class) putative	4.03238	-3.49336	-2.52068	2.05977	0.340994	-5.93624	0
														At5g39210	15720421	15721328	sense	K3K3.10	expressed protein	4.03549	-1.58859	-3.37752	1.08132	1.74749	-4.74407	0
														At3g51480	19111655	19115804	sense	F26O13.120	glutamate receptor familyprotein (GLR3.6)	4.06545	0.64127	-4.51157	-0.386177	4.15603	-2.96662	0
														At1g60950	22448185	22448826	sense	T7P1.9	ferredoxin chloroplast (PETF)	4.08633	0.710451	-5.16151	-0.0578108	4.2453	-3.35318	0
														At3g54850	20332409	20334998	sense	F28P10.170	armadillo/beta-catenin repeatfamily protein / U-box domain-containing family protein	4.09104	1.80674	-7.74687	-0.0522673	5.89098	-3.3495	0
														At5g16030	5238186	5240750	sense	F1N13.170	expressed protein	4.10253	-1.35415	-5.4277	2.19147	2.03537	-6.5494	0
														At2g30540	13018182	13018861	Complement	T6B20.11	glutaredoxin family protein	4.14857	0.850805	-1.86877	-2.89322	4.50306	-0.814788	0
														At5g26340	9243514	9247069	Complement	F9D12.17	hexose transporter putative	4.16382	-6.08729	4.27671	-2.65399	-1.11567	-1.0711	0
														At4g12800	7521319	7522667	sense	T20K18.150	photosystem I reaction centersubunit XI chloroplast (PSI-L) / PSI subunit V	4.16637	0.704927	-6.30412	0.582995	4.29615	-4.14938	0
														At2g29340	12604194	12606280	sense	F16P2.28	short-chaindehydrogenase/reductase (SDR) family protein	4.18985	0.633708	-1.72058	-2.72049	4.29993	-0.880062	0
														At4g21280	11334412	11335783	sense	F7J7.220	oxygen-evolving enhancer protein3 chloroplast putative (PSBQ1) (PSBQ)	4.20283	0.53637	-5.96947	0.522459	4.13198	-4.11369	0
														At3g62000	22970176	22972184	Complement	F21F14.170	O-methyltransferase family 3protein	4.21542	0.394947	-5.18991	0.132806	3.97762	-3.64702	0
														At4g04640	2350496	2352016	Complement	T19J18.4	ATP synthase gamma chain 1chloroplast (ATPC1)	4.22093	0.763949	-4.34992	-0.707803	4.42113	-2.80039	0
														At3g51830	19231126	19236257	sense	ATEM1.8	phosphoinositide phosphatasefamily protein	4.22615	-5.56916	2.56746	-1.64721	-0.696189	-1.84415	0
														At1g80180	30161718	30162476	Complement	F18B13.26	expressed protein	4.2271	-4.32467	4.13365	-3.95145	-0.0865022	-0.174552	0
														At1g67740	25397731	25398817	Complement	F12A21.13	photosystem II core complexproteins psbY chloroplast (PSBY) / L-argininemetabolising enzyme	4.23122	0.555475	-4.46518	-0.421342	4.17332	-3.11401	0
														At1g67700	25377897	25379693	sense	F12A21.32	expressed protein	4.2363	0.293708	-4.5893	-0.0890512	3.87303	-3.44255	0
														At5g13630	4387337	4392230	Complement	MSH12.9	magnesium-chelatase subunit chlHchloroplast putative / Mg-protoporphyrin IX chelataseputative (CHLH)	4.25002	0.990213	-6.75587	0.331702	4.7726	-3.92689	0
														At4g34190	16372394	16373630	Complement	F28A23.50	stress enhanced protein 1(SEP1)	4.25593	0.315561	-4.72933	-0.0456121	3.91236	-3.48596	0
														At5g19440	6556422	6558344	sense	F7K24.190	cinnamyl-alcohol dehydrogenaseputative (CAD)	4.26542	-6.33101	-2.83514	4.47067	-1.14411	-11.4316	0
														At3g61190	22661502	22662424	Complement	T20K12.90	BON1-associated protein 1(BAP1)	4.2831	0.999176	-2.92446	-2.15859	4.76789	-1.52998	0
														At2g17120	7466129	7468388	sense	F6P23.25	peptidoglycan-binding LysMdomain-containing protein	4.2865	-1.36956	-4.01417	1.15064	2.13242	-5.05428	0
														At5g54270	22055555	22056794	sense	MDK4.9	chlorophyll A-B binding protein /LHCII type III (LHCB3)	4.28865	1.45358	-7.30396	0.134858	5.42709	-3.73256	0
														At4g28400	14048360	14050341	sense	F20O9.80	protein phosphatase 2C putative/ PP2C putative	4.28995	0.356567	-6.75227	1.03569	3.99084	-4.82061	0
														At1g12900	4392448	4394350	Complement	F13K23.15	glyceraldehyde 3-phosphatedehydrogenase chloroplast putative / NADP-dependentglyceraldehydephosphate dehydrogenase putative	4.2931	0.981533	-6.3943	0.193592	4.77439	-3.80135	0
														At4g21960	11646186	11648373	Complement	T8O5.170	peroxidase 42 (PER42) (P42)(PRXR1)	4.30128	-0.35211	-8.88634	2.72137	3.22444	-7.34204	0
														At1g73885	27790525	27791369	sense	F2P9.32	expressed protein	4.3032	0.116161	-4.54345	-0.0255245	3.62193	-3.4185	0
														At5g52320	21262204	21263908	Complement	K24M7.5	cytochrome P450 putative	4.30832	-2.16118	-2.88617	0.994787	1.50003	-4.80703	0
														At1g70530	26592413	26595042	Complement	F24J13.10	protein kinase family protein	4.3109	-2.17102	-3.11378	1.21021	1.47084	-5.13808	0
														At3g26710	9814763	9815987	sense	MLJ15.10	expressed protein	4.3144	-1.84582	-4.50714	1.96236	1.78536	-6.19482	0
														At3g21000	7363927	7365144	sense	MSA6.5	expressed protein	4.31613	0.444915	-5.77682	0.485236	4.11779	-4.163	0
														At3g55280	20511312	20512686	sense	T26I12.160	60S ribosomal protein L23A(RPL23aB)	4.3366	-0.323479	-5.08795	0.720562	3.18619	-4.52951	0
														At1g17220	5885076	5890410	sense	F20D23.8	translation initiation factorIF-2 chloroplast putative	4.34027	0.710044	-5.54314	0.0130138	4.46028	-3.6401	0
														At4g01150	493548	494795	sense	F2N1.18	expressed protein	4.34088	0.699338	-5.53758	-0.000988914	4.45715	-3.61622	0
														At1g76180	28591667	28592771	Complement	T23E18.12	dehydrin (ERD14)	4.3441	1.16048	-2.50946	-2.7374	5.11744	-1.05487	0
														At4g33790	16204159	16207947	Complement	T16L1.280	acyl CoA reductase putative	4.43933	-3.56782	-4.71534	3.79086	0.50564	-12.4467	0
														At1g08380	2640858	2641825	Complement	T27G7.25	expressed protein	4.45031	1.00127	-7.7336	0.668555	4.94028	-4.50489	0
														At3g51870	19254931	19257913	sense	ATEM1.12	mitochondrial substrate carrierfamily protein	4.4506	-0.147342	-5.70646	0.80368	3.4914	-4.73975	0
														At2g44920	18531480	18533902	sense	T13E15.1	thylakoid lumenal 15 kDaprotein chloroplast	4.45399	-0.487746	-4.61003	0.542744	3.02999	-4.38629	0
														At1g74670	28056960	28057810	sense	F1M20.35	gibberellin-responsive proteinputative	4.46381	3.72511	-2.15856	-6.75996	9.66056	1.1923	0
														At3g08910	2710160	2711898	Complement	T16O11.15	DNAJ heat shock proteinputative	4.47645	0.977904	-7.74114	0.627049	4.94451	-4.47826	0
														At3g53390	19803509	19807731	sense	F4P12.90	transducin family protein /WD-40 repeat family protein	4.48385	0.713866	-3.72163	-1.27529	4.63319	-2.33091	0
														At2g36590	15349758	15352416	Complement	F1O11.22	proline transporter putative	4.48965	2.94596	-3.18117	-4.2698	9.00237	-0.121482	0
														At4g25830	13133645	13135033	sense	F14M19.9	integral membrane familyprotein	4.50415	0.308635	-4.81129	-0.165451	4.096	-3.50634	0
														At1g34000	12357604	12359205	Complement	F12G12.18	light stress-responsiveone-helix protein (OHP2)	4.50514	1.7893	-3.74253	-2.42607	6.2249	-1.41479	0
														At4g05180	2671820	2673241	Complement	C17L7.100	oxygen-evolving enhancerprotein 3 chloroplast putative (PSBQ2)	4.50871	0.359112	-7.48334	1.08529	4.17301	-5.14333	0
														At5g66570	26585884	26587504	sense	K1F13.25	oxygen-evolving enhancer protein1-1 chloroplast / 33 kDa subunit of oxygen evolvingsystem of photosystem II (PSBO1) (PSBO)	4.51426	0.841885	-6.34904	0.210701	4.77726	-4.00611	0
														At2g26500	11277225	11278031	sense	T9J22.17	cytochrome b6f complex subunit(petM) putative	4.5172	0.234854	-5.68632	0.431477	4.02907	-4.26826	0
														At1g69120	25985999	25989919	Complement	F4N2.9	floral homeotic protein APETALA1(AP1) / agamous-like MADS box protein (AGL7)	4.52773	3.53733	-4.13225	-3.93551	12.3039	-0.327526	0
														At4g23990	12456534	12460763	sense	T32A16.160	cellulose synthase familyprotein	4.53699	-2.81205	-2.99229	1.54359	1.08986	-5.92783	0
														At5g62360	25057882	25058687	sense	MMI9.1	invertase/pectin methylesteraseinhibitor family protein	4.65007	-0.859891	-4.58697	0.786832	2.97282	-4.81329	0
														At1g32470	11739284	11740308	Complement	F5D14.25	glycine cleavage system Hprotein mitochondrial putative	4.65089	-0.285321	-5.5248	0.722433	3.45949	-4.80746	0
														At1g11260	3777329	3780337	sense	T28P6.9	glucose transporter (STP1)	4.67441	-1.37686	-4.28905	1.08795	2.41867	-5.29303	0
														At3g12750	4051658	4053187	Complement	MBK21.8	zinc transporter (ZIP1)	4.67561	0.818507	-4.47777	-0.987893	4.93611	-2.77273	0
														At3g13780	4525079	4526221	sense	MMM17.21	expressed protein	4.70808	-2.53976	-3.23668	1.48196	1.26192	-6.47361	0
														At1g33590	12177757	12179393	sense	T1E4.3	disease resistance protein-related/ LRR protein-related	4.71829	-1.76307	-4.59747	1.65377	2.12547	-6.1427	0
														At5g01530	208936	210444	sense	F7A7.50	chlorophyll A-B binding proteinCP29 (LHCB4)	4.728	1.31824	-6.50517	-0.352266	5.6566	-3.52903	0
														At1g72940	27445899	27447517	sense	F3N23.14	disease resistance protein(TIR-NBS class) putative	4.75123	0.807269	-3.44986	-1.81136	4.96554	-2.0802	0
														At4g18280	10104007	10104735	sense	T9A21.130	glycine-rich cell wallprotein-related	4.76583	1.97233	-2.10842	-4.62228	6.82515	-0.0765096	0
														At3g61390	22727328	22729348	sense	T20K12.290	U-box domain-containingprotein	4.77386	0.357954	-6.34468	0.491332	4.38956	-4.55737	0
														At4g10060	6288850	6295398	sense	T5L19.190	expressed protein	4.79548	1.91249	-4.00446	-2.57806	6.65819	-1.5066	0
														At4g09650	6100740	6101705	sense	T25P22.90	ATP synthase delta chainchloroplast putative / H(+)-transporting two-sectorATPase delta (OSCP) subunit putative	4.79888	1.07897	-4.54276	-1.30319	5.3484	-2.63469	0
														At3g43230	15218355	15220813	sense	F7K15.80	zinc finger (FYVE type) familyprotein	4.83337	3.28785	-3.20027	-4.99844	9.28466	0.0995563	0
														At5g66190	26467983	26470388	Complement	K2A18.27	ferredoxin--NADP(+) reductaseputative / adrenodoxin reductase putative	4.83489	0.202023	-4.96775	-0.158524	4.20317	-3.72111	0
														At4g39710	18427033	18428353	Complement	F23K16.13	immunophilin putative /FKBP-type peptidyl-prolyl cis-trans isomerase putative	4.85295	-1.28167	-4.18443	0.81569	2.58529	-5.08615	0
														At3g27650	10239783	10241848	sense	MGF10.6	LOB domain protein 25 / lateralorgan boundaries domain protein 25 (LBD25)	4.89724	1.92888	-4.40652	-2.33924	6.78982	-1.76427	0
														At2g45180	18633413	18633951	sense	T14P1.36	protease inhibitor/seedstorage/lipid transfer protein (LTP) family protein	4.96805	0.94926	-3.27998	-2.29072	5.3343	-1.85012	0
														At3g23660	8513464	8517790	Complement	MDB19.16	transport protein putative	4.97699	0.933765	-4.85834	-1.04413	5.44942	-2.83765	0
														At4g28740	14200995	14202651	sense	F16A16.150	expressed protein	4.98617	0.806259	-3.61646	-1.80915	5.19016	-2.19391	0
														At1g49750	18414597	18416469	Complement	F14J22.4	leucine-rich repeat familyprotein	4.99343	-0.569178	-7.08892	1.6548	3.47208	-6.47766	0
														At4g37980	17852583	17854494	sense	F20D10.100	mannitol dehydrogenaseputative (ELI3-1)	5.04832	0.63794	0.028549	-6.23886	4.98925	0.579041	0
														At3g18800	6479694	6480384	sense	MVE11.18	expressed protein	5.05056	-3.762	-2.164	1.22719	0.744976	-5.85201	0
														At5g35630	13847846	13850681	sense	MJE4.9	glutamine synthetase (GS2)	5.05568	0.785999	-7.78831	0.444409	5.21318	-4.73065	0
														At2g39730	16577824	16580626	Complement	T5I7.18	ribulose bisphosphatecarboxylase/oxygenase activase / RuBisCO activase	5.13212	0.519686	-5.69544	-0.233248	4.89791	-3.94095	0
														At1g23390	8309101	8310638	Complement	F28C11.3	kelch repeat-containing F-boxfamily protein	5.13257	0.997266	-3.30466	-2.32046	5.6929	-1.76979	0
														At4g10120	6314910	6319932	sense	F28M11.40	sucrose-phosphate synthaseputative	5.14038	-3.40945	3.92823	-5.73766	1.06269	0.312041	0
														At5g40780	16340879	16344502	sense	K1B16.3	lysine and histidine specifictransporter putative	5.19944	-3.75552	-2.8405	1.75369	0.817928	-6.98175	0
														At1g16880	5773657	5776301	sense	F6I1.12	uridylyltransferase-related	5.23434	0.715308	-4.11456	-1.41988	5.3176	-2.59486	0
														At4g38690	18074469	18075759	Complement	F20M13.250	1-phosphatidylinositolphosphodiesterase-related	5.29109	0.698181	-4.45115	-1.26137	5.2966	-2.86936	0
														At5g04490	1279761	1281670	sense	T32M21.90	phosphatidatecytidylyltransferase family protein	5.32102	-2.96012	-2.77545	1.05419	1.34063	-5.98529	0
														At4g24000	12462040	12465634	sense	T32A16.170	cellulose synthase familyprotein	5.3257	-1.58831	-4.22574	0.911129	2.48019	-5.73549	0
														At2g40100	16752881	16754478	sense	F27I1.2	chlorophyll A-B binding protein(LHCB4.3)	5.33044	0.954473	-3.58507	-2.30168	5.65691	-2.07852	0
														At5g08050	2578370	2579164	sense	F13G24.250	expressed protein	5.33067	0.569851	-5.42542	-0.55864	5.12463	-3.72574	0
														At1g22710	8030630	8033106	Complement	T22J18.12	sucrose transporter /sucrose-proton symporter (SUC2)	5.34005	1.54021	-1.98894	-4.67881	6.78937	-0.34029	0
														At3g16220	5497620	5499241	sense	MYA6.3	expressed protein	5.37649	0.101457	-5.56828	-0.0429797	4.47274	-4.27538	0
														At2g26530	11289853	11291307	Complement	T9J22.20	expressed protein	5.42421	1.19219	-4.08299	-2.02722	6.47567	-2.08989	0
														At3g48640	18032635	18033309	Complement	T8P19.150	expressed protein	5.42483	-4.03351	-2.61697	1.67207	0.711728	-7.31821	0
														At5g58570	23689929	23690513	Complement	MQJ2.19	expressed protein	5.45534	1.88136	-2.80409	-4.2194	7.57487	-0.677895	0
														At5g64410	25768071	25772277	Complement	MSJ1.25	oligopeptide transporter OPTfamily protein	5.47041	1.78017	-5.80616	-1.64477	7.38126	-2.67168	0
														At3g62790	23234059	23235283	Complement	F26K9.220	NADH-ubiquinoneoxidoreductase-related	5.48211	-5.63639	0.531819	-0.400599	-0.107235	-4.01084	0
														At1g68570	25750400	25753938	sense	F24J5.19	proton-dependent oligopeptidetransport (POT) family protein	5.50263	-2.1362	2.51653	-6.03932	2.2636	0.263585	0
														At5g64040	25645814	25646730	Complement	MBM17.17	photosystem I reaction centersubunit PSI-N chloroplast putative / PSI-N putative(PSAN)	5.52987	1.244	-8.90365	0.133041	6.35036	-4.69691	0
														At5g59320	23946197	23946965	sense	MNC17.10	lipid transfer protein 3 (LTP3)	5.557	-3.43827	-7.13989	4.53223	1.30436	-16.3026	0
														At5g18600	6183265	6183956	Complement	T28N17.80	glutaredoxin family protein	5.57155	2.0327	-0.625675	-8.51944	7.74409	1.20001	0
														At1g72610	27342776	27343706	Complement	F28P22.20	germin-like protein (GER1)	5.58134	1.80432	-7.61138	-0.811022	7.32599	-3.65115	0
														At5g59130	23887418	23890917	Complement	MNC17.3	subtilase family protein	5.5925	0.834409	-2.247	-3.52011	5.80315	-1.13405	0
														At5g01750	289762	291323	sense	T20L15.20	expressed protein	5.61006	-2.6962	-5.33829	2.48375	1.93054	-8.5347	0
														At4g19170	10481797	10483868	sense	T18B16.140	9-cis-epoxycarotenoiddioxygenase putative / neoxanthin cleavage enzymeputative / carotenoid cleavage dioxygenase putative	5.66918	3.22749	-4.66167	-4.1132	10.926	-0.911491	0
														At2g35370	14898181	14899297	sense	T32F12.25	glycine cleavage system Hprotein 1 mitochondrial (GDCSH) (GCDH)	5.72512	0.227498	-6.41196	0.00636031	4.87679	-4.51219	0
														At4g19840	10774286	10775911	sense	T16H5.200	lectin-related	5.76301	0.902971	-1.12832	-5.41699	5.96741	-0.176079	0
														At1g03130	753307	754198	Complement	F10O3.4	photosystem I reaction centersubunit II chloroplast putative / photosystem I 20 kDasubunit putative / PSI-D putative (PSAD2)	5.77414	2.01454	-5.47126	-2.26365	8.11255	-2.33022	0
														At5g44020	17729638	17731563	sense	MRH10.13	acid phosphatase class B familyprotein	5.81453	-3.8333	-3.9621	2.36842	1.12261	-8.97914	0
														At4g38970	18163490	18165734	Complement	F19H22.70	fructose-bisphosphate aldolaseputative	5.84833	0.0327799	-5.9961	0.0124036	4.80899	-4.78502	0
														At3g15353	5180674	5181407	Complement	K7L4.17	metallothionein proteinputative	5.93111	0.923214	-5.20791	-1.37397	6.21934	-3.17812	0
														At3g55770	20714284	20716298	sense	F1I16.180	LIM domain-containing protein	6.20751	-0.126467	-6.31185	0.142257	4.83466	-5.20727	0
														At1g72150	27152122	27154642	sense	T9N14.1	SEC14 cytosolic factor familyprotein / phosphoglyceride transfer family protein	6.24928	-3.06406	-3.2388	0.951422	1.80204	-6.56723	0
														At2g22990	9793396	9797259	sense	F21P24.5	sinapoylglucose:malatesinapoyltransferase (SNG1)	6.25202	-3.74128	-3.64106	1.82208	1.33121	-8.53031	0
														At1g27730	9648128	9649060	Complement	T22C5.18	zinc finger (C2H2 type) familyprotein (ZAT10) / salt-tolerance zinc finger protein(STZ)	6.27198	-3.8494	-3.21315	1.48443	1.33089	-7.5298	0
														At4g03280	1440177	1441861	sense	F4C21.21	cytochrome B6-F complexiron-sulfur subunit chloroplast / Rieske iron-sulfurprotein / plastoquinol-plastocyanin reductase (petC)	6.28291	0.312622	-6.37557	-0.309893	5.51019	-4.65929	0
														At4g36530	17239961	17241940	Complement	AP22.96	hydrolase alpha/beta fold familyprotein	6.29352	0.905886	-4.4066	-2.10668	6.50348	-2.6786	0
														At1g09970	3252242	3255695	sense	F21M12.36	leucine-rich repeattransmembrane protein kinase putative	6.30735	-3.86791	-2.3248	0.865985	1.17047	-6.51595	0
														At1g75040	28181364	28182601	sense	F9E10.11	pathogenesis-related protein 5(PR-5)	6.94326	-5.0806	-2.79609	1.64737	0.891465	-8.53261	0
														At1g32060	11532530	11534619	sense	T12O21.4	phosphoribulokinase (PRK) /phosphopentokinase	7.18609	0.691095	-7.27609	-0.694549	6.84848	-4.71097	0
														At5g35735	13917982	13920227	Complement	MXH1.11	auxin-responsive family protein	7.18875	-3.01316	-5.02714	1.69858	2.37775	-9.11577	0
														At4g14690	8418278	8419258	sense	FCAALL.232	chlorophyll A-B binding familyprotein / early light-induced protein putative	7.19918	2.14468	-6.47081	-2.56673	10.5808	-2.75908	0
														At1g29670	10375753	10378144	sense	F15D2.22	GDSL-motif lipase/hydrolasefamily protein	7.23098	-3.46171	-5.3211	2.29605	2.01374	-11.3328	0
														At5g65730	26316263	26317704	sense	MPA24.8	xyloglucan:xyloglucosyltransferase putative / xyloglucan endotransglycosylaseputative / endo-xyloglucan transferase putative	7.9748	-4.3661	-4.96576	2.3984	1.7731	-12.3419	0
														At5g59310	23942311	23943078	Complement	MNC17.4	lipid transfer protein 4 (LTP4)	8.08345	-3.62174	-5.69399	2.20439	2.39263	-11.4486	0
														At3g14190	4710490	4711976	sense	MAG2.18	expressed protein	8.81657	-4.9498	-3.93216	1.65877	1.72838	-10.6307	0

## Sheet: PET
Genes down-regulated in PETals (all: 106, highest absolute D stat: 26)														Genes up-regulated in PETals (all: 282, highest absolute D stat: 214)
gene	bpstart	bpend	strand	synonym	annotation	SEP	PET	STA	CAR	SEP+PET	PET+STA	d stat test		gene	bpstart	bpend	strand	synonym	annotation	SEP	PET	STA	CAR	SEP+PET	PET+STA	d stat test
At2g03980	1259196	1262549	sense	F3C11.9	GDSL-motif lipase/hydrolasefamily protein	0.263567	-6.53626	2.85339	2.33081	-4.91022	-2.24402	6.53626		At3g48425	17942803	17945729	sense	T29H11.60	endonuclease/exonuclease/phosphatase family protein	-1.71919	10.3313	-0.729576	-4.52866	4.64323	6.04407	10.3313
At5g26340	9243514	9247069	Complement	F9D12.17	hexose transporter putative	4.16382	-6.08729	4.27671	-2.65399	-1.11567	-1.0711	6.08729		At5g55720	22573273	22574951	sense	MDF20.16	pectate lyase family protein	-3.55382	10.244	0.507035	-4.43566	3.20498	8.7603	10.244
At1g58360	21680201	21684148	sense	F19C14.3	amino acid permease I (AAP1)	2.82061	-5.85201	1.57335	0.701698	-1.97431	-3.09579	5.85201		At4g38950	18154466	18158455	Complement	F19H22.50	kinesin motor family protein	-2.29266	10.0449	-3.00898	-1.43051	4.02507	3.35822	10.0449
At1g73600	27672813	27677233	sense	F6D5.1	phosphoethanolamineN-methyltransferase 3 putative (NMT3)	1.35821	-5.66735	2.77916	0.655455	-2.99844	-1.76162	5.66735		At1g63710	23635841	23637605	Complement	F24D7.10	cytochrome P450 putative	-3.1059	9.94512	0.11449	-4.14992	3.37431	7.6621	9.94512
At3g62790	23234059	23235283	Complement	F26K9.220	NADH-ubiquinoneoxidoreductase-related	5.48211	-5.63639	0.531819	-0.400599	-0.107235	-4.01084	5.63639		At4g24140	12529885	12533803	Complement	T19F6.130	hydrolase alpha/beta foldfamily protein	-1.53334	9.46765	-2.12404	-3.18893	4.96537	4.3134	9.46765
At3g51830	19231126	19236257	sense	ATEM1.8	phosphoinositide phosphatasefamily protein	4.22615	-5.56916	2.56746	-1.64721	-0.696189	-1.84415	5.56916		At5g49330	20016178	20018604	Complement	K21P3.23	myb family transcription factor	-3.00967	9.44777	-2.65835	-0.632006	2.86764	3.20542	9.44777
At1g05710	1714949	1717269	sense	F3F20.16	ethylene-responsive proteinputative	1.05336	-5.42899	0.608812	2.79605	-3.00788	-3.53368	5.42899		At5g52390	21281162	21282490	Complement	K24M7.13	photoassimilate-responsiveprotein putative	-1.47678	9.21096	-1.24378	-3.63168	4.47107	4.78576	9.21096
At5g20830	7050228	7054121	Complement	T1M15.230	sucrose synthase / sucrose-UDPglucosyltransferase (SUS1)	1.319	-5.28843	4.73186	-0.899118	-2.87988	-0.351612	5.28843		At1g58430	21715230	21716768	Complement	X7J.14	GDSL-motif lipase/hydrolase familyprotein	-4.48467	8.98973	0.474771	-2.81059	1.95662	7.77841	8.98973
At2g32150	13666096	13667841	sense	F22D22.10	haloacid dehalogenase-likehydrolase family protein	2.75589	-5.28702	3.91128	-1.69685	-1.60089	-0.819685	5.28702		At1g70720	26670070	26670866	sense	F5A18.10	invertase/pectin methylesteraseinhibitor family protein	-3.09398	8.88117	-0.448186	-3.22742	3.19085	6.21292	8.88117
At4g24040	12488193	12491207	sense	T19F6.30	glycosyl hydrolase familyprotein 37 / trehalase putative	2.87927	-5.10548	0.699277	0.85755	-1.34944	-3.34574	5.10548		At1g01600	219131	221286	sense	F22L4.14	cytochrome P450 putative	-2.11376	8.83736	-0.343492	-4.46592	4.13001	6.36258	8.83736
At1g43910	16658044	16660096	Complement	F9C16.7	AAA-type ATPase family protein	2.33819	-4.6171	-0.334018	2.17289	-1.55516	-4.26069	4.6171		At2g42990	17886121	17887631	sense	F23E6.2	GDSL-motif lipase/hydrolasefamily protein	-4.56238	8.45927	0.257289	-2.3779	1.80203	7.0315	8.45927
At3g27730	10275084	10281450	Complement	MGF10.13	ATP-dependent DNA helicaseputative	1.59597	-4.54172	2.75288	-0.406625	-1.87322	-0.994345	4.54172		At5g11420	3644599	3647296	sense	F2I11.1	expressed protein	-2.58243	8.459	0.516699	-4.61717	3.302	7.52231	8.459
At5g52450	21306125	21309088	Complement	K24M7.20	MATE efflux protein-related	3.77348	-4.52652	2.58224	-1.95634	-0.448855	-1.28115	4.52652		At4g13710	7962428	7966440	sense	F18A5.100	pectate lyase family protein	-3.80154	8.3536	-0.67864	-1.7539	2.1225	5.29262	8.3536
At1g69870	26319690	26323883	sense	T17F3.10	proton-dependent oligopeptidetransport (POT) family protein	2.63819	-4.50448	3.90298	-2.07698	-1.33419	-0.438094	4.50448		At3g49230	18265414	18266103	sense	F2K15.90	hypothetical protein	-1.19768	8.31421	-2.75231	-2.12803	4.56601	2.972	8.31421
At1g80180	30161718	30162476	Complement	F18B13.26	expressed protein	4.2271	-4.32467	4.13365	-3.95145	-0.0865022	-0.174552	4.32467		At2g17845	7765928	7766963	sense	T13L16.19	short-chaindehydrogenase/reductase (SDR) family protein	-2.08832	8.21252	-1.63003	-2.22882	3.49061	3.99942	8.21252
At1g05570	1647725	1658622	Complement	F3F20.1	callose synthase 1 (CALS1) /13-beta-glucan synthase 1	-0.0402704	-4.27015	2.10338	1.87426	-3.63406	-1.57213	4.27015		At3g10540	3289700	3292707	sense	F13M14.18	3-phosphoinositide-dependentprotein kinase putative	-2.97824	8.14526	-0.218597	-3.0656	2.82372	6.00157	8.14526
At1g61740	22801734	22804738	Complement	T13M11.10	expressed protein	2.43827	-4.04827	2.49973	-1.10875	-1.09104	-1.06216	4.04827		At1g16060	5508501	5511729	sense	T24D18.16	ovule development proteinputative	-3.21678	8.13898	-1.27991	-1.47955	2.43521	4.35105	8.13898
At1g45145	17077382	17078761	Complement	F27F5.21	thioredoxin H-type 5 (TRX-H-5)(TOUL)	2.85546	-3.94925	3.91212	-2.76233	-0.793804	-0.067226	3.94925		At5g48900	19842363	19846318	sense	K24G6.1	pectate lyase family protein	-2.74178	8.08441	-0.697518	-2.76028	3.03291	5.28973	8.08441
At5g53120	21551780	21555474	sense	MFH8.5	spermidine synthase putative /putrescine aminopropyltransferase putative	0.51529	-3.90146	0.275993	2.86475	-2.7092	-2.96859	3.90146		At1g15260	5249755	5250568	sense	F9L1.20	expressed protein	-0.0620412	8.01201	-2.98115	-3.21493	6.16635	2.79564	8.01201
At3g07350	2347474	2348797	sense	F21O3.6	expressed protein	0.561917	-3.84499	2.5288	0.535968	-2.65119	-0.952054	3.84499		At2g41830	17457218	17464165	Complement	T11A7.7	cyclin-related	-2.57748	7.73374	-0.385877	-2.72137	2.69573	5.2487	7.73374
At3g18510	6355670	6356159	sense	MYF24.41	expressed protein	1.49101	-3.71001	0.954929	0.979574	-1.68139	-2.1829	3.71001		At3g56230	20871878	20873244	Complement	F18O21.190	speckle-type POZprotein-related	-1.74437	7.64305	-1.18793	-2.86584	3.65156	4.29516	7.64305
At5g15800	5151080	5154156	Complement	F14F8.180	developmental proteinSEPALLATA1 / floral homeotic protein (AGL2) (SEP1)	-0.0442842	-3.66575	1.16792	2.27263	-3.12871	-1.89493	3.66575		At5g38120	15230995	15233433	sense	F16F17.12	4-coumarate--CoA ligase familyprotein / 4-coumaroyl-CoA synthase family protein	-2.01889	7.40501	-0.776399	-2.81189	3.1756	4.60534	7.40501
At4g28290	14011875	14012589	Complement	F26K10.170	expressed protein	1.91972	-3.64028	2.38318	-0.816186	-1.256	-0.910511	3.64028		At1g54820	20451032	20454528	sense	T22H22.21	protein kinase family protein	0.274204	7.37716	-3.40681	-2.93772	6.31474	2.24455	7.37716
At5g59220	23911630	23913845	Complement	MNC17.13	protein phosphatase 2C putative/ PP2C putative	2.03496	-3.6094	-0.41048	1.73847	-1.1236	-3.51423	3.6094		At1g02340	465718	467844	Complement	T6A9.4	long hypocotyl in far-red 1 (HFR1)/ reduced phytochrome signaling (REP1) / basichelix-loop-helix FBI1 protein (FBI1) / reduced sensitivityto far-red light (RSF1) / bHLH protein 26 (BHLH026)(BHLH26)	-2.14213	7.37381	-2.17141	-1.34813	3.14478	3.14072	7.37381
At5g06370	1947140	1948574	Complement	MHF15.11	NC domain-containing protein	0.441309	-3.56032	2.87806	0.17058	-2.57877	-0.528363	3.56032		At3g51190	19027585	19028526	Complement	F24M12.230	60S ribosomal protein L8(RPL8B)	-3.74637	7.30978	-2.68895	0.549266	1.74525	2.58336	7.30978
At1g12880	4389749	4391149	sense	F13K23.14	MutT/nudix family protein	0.621077	-3.54869	1.16666	1.47429	-2.34708	-1.83935	3.54869		At4g32460	15662272	15664983	Complement	F8B4.160	expressed protein	-5.65027	7.20738	-0.326335	-0.447639	0.667323	5.21788	7.20738
At1g09310	3009057	3009882	sense	T31J12.3	expressed protein	-0.946707	-6.97807	-0.0710184	9.73765	-7.16291	-5.74114	0		At2g41540	17333175	17336900	sense	T32G6.6	NAD-dependentglycerol-3-phosphate dehydrogenase family protein	-4.59295	7.18844	-0.630931	-0.786588	1.2249	4.7819	7.18844
At1g72260	27202095	27203106	Complement	T9N14.13	thionin (THI2.1)	-1.48232	-6.93506	1.2095	7.61714	-8.31117	-4.02635	0		At5g17220	5658462	5659388	sense	MKP11.22	glutathione S-transferaseputative	-1.7896	7.07088	-1.55462	-2.2238	3.40922	3.67141	7.07088
At5g19440	6556422	6558344	sense	F7K24.190	cinnamyl-alcohol dehydrogenaseputative (CAD)	4.26542	-6.33101	-2.83514	4.47067	-1.14411	-11.4316	0		At4g22730	11941395	11943750	sense	T12H17.120	leucine-rich repeattransmembrane protein kinase putative	-2.27289	6.96664	-2.36172	-0.966551	2.92741	2.87169	6.96664
At5g24420	8336617	8337971	Complement	K16H17.13	glucosamine/galactosamine-6-phosphate isomerase-related	-1.38955	-5.82589	0.521265	7.69437	-6.92354	-4.14458	0		At1g79700	29995164	29998617	Complement	F20B17.12	ovule development proteinputative	-2.21789	6.92155	-1.57382	-1.49162	2.72942	3.38338	6.92155
At2g01850	385222	387343	sense	T23K3.4	xyloglucan:xyloglucosyltransferase / xyloglucan endotransglycosylase /endo-xyloglucan transferase (EXGT-A3)	5.83132	-5.49934	0.892414	-1.043	0.135993	-3.51944	0		At4g28780	14215551	14217585	sense	F16A16.110	GDSL-motif lipase/hydrolasefamily protein	-1.39477	6.82719	-1.60527	-2.38522	3.62683	3.42681	6.82719
At5g20230	6826508	6827601	sense	F5O24.120	plastocyanin-likedomain-containing protein	0.328546	-5.28583	7.8454	-1.54498	-4.00311	1.03941	0		At3g44580	16171499	16171990	Complement	F14L2.130	hypothetical protein	-1.52	6.80459	-2.54126	-1.45997	3.59861	2.64963	6.80459
At3g11440	3602100	3605110	sense	F24K9.11	myb family transcription factor(MYB65)	5.33799	-5.22724	0.636575	-0.658813	0.026108	-3.60544	0		At4g14750	8470376	8472182	sense	FCAALL.303	calmodulin-binding familyprotein	-0.658406	6.71733	-1.07835	-3.90807	4.50439	4.02028	6.71733
At1g75040	28181364	28182601	sense	F9E10.11	pathogenesis-related protein 5(PR-5)	6.94326	-5.0806	-2.79609	1.64737	0.891465	-8.53261	0		At1g01610	221691	224315	Complement	F22L4.15	phospholipid/glycerolacyltransferase family protein	-1.92076	6.57149	-2.68534	-0.742936	2.99854	2.34126	6.57149
At3g14190	4710490	4711976	sense	MAG2.18	expressed protein	8.81657	-4.9498	-3.93216	1.65877	1.72838	-10.6307	0		At4g30670	14957371	14957968	Complement	T10C21.20	expressed protein	-0.521613	6.55802	-1.47107	-3.32425	4.46094	3.36521	6.55802
At5g65380	26140215	26143665	Complement	MNA5.11	ripening-responsive proteinputative	1.18838	-4.91464	5.18979	-1.27109	-2.68419	0.0703338	0		At2g46710	19199005	19201919	sense	T3A4.9	rac GTPase activating proteinputative	-0.0283694	6.50914	-3.10856	-2.37677	5.23651	2.06225	6.50914
At5g23210	7811613	7815042	sense	MKD15.7	serine carboxypeptidase S10family protein	6.11426	-4.88223	1.54114	-2.24293	0.5768	-2.4532	0		At1g10060	3284241	3287109	sense	T27I1.8	branched-chain amino acidaminotransferase 1 / branched-chain amino acidtransaminase 1 (BCAT1)	0.475758	6.48122	-1.45946	-4.77467	5.95427	3.41117	6.48122
At2g02990	873505	874810	sense	T17M13.16	ribonuclease 1 (RNS1)	3.79014	-4.75834	6.32355	-5.04576	-0.654971	0.811657	0		At3g16920	5776492	5777881	Complement	K14A17.26	glycoside hydrolase family 19protein	-3.96322	6.47254	-1.05235	-0.132565	1.01408	3.42952	6.47254
At4g23600	12310629	12313222	sense	F9D16.70	coronatine-responsive tyrosineaminotransferase / tyrosine transaminase	10.1459	-4.73709	-0.56734	-1.55645	1.85236	-4.65709	0		At5g23940	8076332	8079796	Complement	MRO11.2	transferase family protein	-3.72791	6.45848	-1.93772	0.193457	1.46565	2.93266	6.45848
At5g22270	7372236	7373105	Complement	MWD9.5	expressed protein	5.19019	-4.61572	0.429617	-0.75701	0.285645	-3.40037	0		At1g30120	10584144	10586615	Complement	T2H7.8	pyruvate dehydrogenase E1component beta subunit chloroplast	-1.49962	6.40808	-2.50575	-1.19275	3.29829	2.38532	6.40808
At5g55180	22406012	22407938	sense	MCO15.13	glycosyl hydrolase family 17protein	-1.90605	-4.61029	1.00329	6.18027	-6.58209	-2.78513	0		At4g10240	6368932	6369522	Complement	F24G24.40	zinc finger (B-box type) familyprotein	-1.5012	6.38286	-1.56461	-2.12791	3.33062	3.28458	6.38286
At5g62680	25182656	25185169	Complement	MRG21.10	proton-dependent oligopeptidetransport (POT) family protein	4.82718	-4.53984	2.95325	-3.12163	0.148675	-1.13529	0		At5g02550	573052	573556	Complement	T22P11.140	expressed protein	-4.91538	6.33695	-1.33737	0.448053	0.745149	3.57359	6.33695
At4g18960	10382867	10388550	sense	F13C5.130	floral homeotic protein AGAMOUS(AG)	-4.01158	-4.51724	6.53678	2.58167	-10.3689	1.0274	0		At4g13210	7670036	7673131	sense	F17N18.100	pectate lyase family protein	-2.07193	6.33476	-0.857814	-2.39182	2.86403	4.12005	6.33476
At2g35760	15039002	15040384	sense	T20F21.5	integral membrane familyprotein	2.82247	-4.49615	-2.48638	4.06685	-1.0921	-7.86726	0		At4g30610	14944135	14948611	sense	F17I23.50	serine carboxypeptidase S10family protein	-1.90636	6.29675	-3.32058	-0.131099	2.90842	1.75417	6.29675
At3g62450	23109120	23109606	sense	T12C14.150	expressed protein	7.77813	-4.48476	0.959007	-2.80448	1.51215	-2.77055	0		At5g14410	4646790	4647447	Complement	F18O22.200	expressed protein	-1.6412	6.23704	-2.79321	-0.733967	3.08527	2.08351	6.23704
At1g19850	6886870	6891365	sense	F6F9.10	transcription factor MONOPTEROS(MP) / auxin-responsive protein (IAA24) / auxin responsefactor 5 (ARF5)	-3.78582	-4.45476	6.57122	2.31673	-9.56252	1.08921	0		At1g49430	18294712	18299493	sense	F13F21.14	long-chain-fatty-acid--CoAligase / long-chain acyl-CoA synthetase	-2.72128	6.20571	-1.71557	-0.517018	1.93924	2.84044	6.20571
At5g65730	26316263	26317704	sense	MPA24.8	xyloglucan:xyloglucosyltransferase putative / xyloglucan endotransglycosylaseputative / endo-xyloglucan transferase putative	7.9748	-4.3661	-4.96576	2.3984	1.7731	-12.3419	0		At3g15000	5050271	5052439	sense	K15M2.14	expressed protein	0.579552	6.20021	-2.75732	-3.13001	5.90728	2.09445	6.20021
At1g75900	28502723	28504799	sense	T4O12.13	family II extracellular lipase 3(EXL3)	3.2347	-4.26204	-3.79202	4.89144	-0.723287	-9.32299	0		At2g37640	15794783	15796931	Complement	F13M22.14	expansin putative (EXP3)	-2.03511	6.17644	-1.37185	-1.72054	2.74519	3.40918	6.17644
At2g25450	10836995	10838733	Complement	F13B15.11	2-oxoglutarate-dependentdioxygenase putative	8.09646	-4.24634	1.71431	-4.22141	1.9219	-1.95876	0		At3g05600	1623397	1624768	Complement	F18C1.13	epoxide hydrolase putative	-3.72239	6.15805	-0.783508	-0.741805	1.32367	3.9667	6.15805
At2g37760	15838940	15840997	sense	T8P21.6	aldo/keto reductase familyprotein	5.42034	-4.18298	2.46238	-3.36869	0.684108	-1.24893	0		At2g28250	12050911	12053614	sense	T3B23.8	protein kinase family protein	-1.96106	6.15502	-2.47387	-0.58341	2.65147	2.22742	6.15502
At2g26440	11254461	11256562	sense	T9J22.11	pectinesterase family protein	1.38925	-4.17741	-3.54318	7.64926	-2.14763	-8.91031	0		At5g10160	3185747	3187604	sense	T31P16.150	beta-hydroxyacyl-ACPdehydratase putative	-3.60246	6.06673	-0.659564	-0.872323	1.32622	4.01577	6.06673
At3g11630	3672126	3674081	sense	F24K9.28	2-cys peroxiredoxin chloroplast(BAS1)	4.93761	-4.15229	3.34675	-3.96903	0.455519	-0.595789	0		At3g06980	2201473	2204839	sense	F17A9.13	DEAD/DEAH box helicaseputative	-0.373724	6.05971	-0.989717	-3.88721	4.40203	3.6794	6.05971
At5g49360	20029105	20033968	Complement	K21P3.26	glycosyl hydrolase family 3protein	6.59268	-4.15183	-2.19359	0.672783	1.25182	-6.32893	0		At5g45960	18654250	18657585	Complement	K15I22.16	GDSL-motif lipase/hydrolasefamily protein	-2.85342	6.04716	-0.93612	-1.33984	1.98723	3.80726	6.04716
At2g39350	16436774	16439635	Complement	T16B24.1	ABC transporter family protein	4.57458	-4.13344	-0.0414086	-0.240811	0.243321	-3.54381	0		At5g17700	5830617	5833903	Complement	MVA3.5	MATE efflux family protein	-0.651287	6.03772	-2.89494	-1.37457	3.94157	1.77722	6.03772
At5g56870	23021422	23025875	sense	MPI10.3	beta-galactosidase putative /lactase putative	5.41293	-4.11933	3.76673	-4.90527	0.70078	-0.259067	0		At1g01090	47485	49279	Complement	T25K16.8	pyruvate dehydrogenase E1component alpha subunit chloroplast	-2.33485	6.01942	-1.27008	-1.34192	2.29667	3.32962	6.01942
At1g35720	13226481	13228407	sense	F14D7.2	annexin 1 (ANN1)	-1.49669	-4.10312	2.74857	2.74152	-5.2791	-0.994643	0		At2g45050	18589947	18591158	sense	T14P1.14	zinc finger (GATA type) familyprotein	-2.38946	6.00216	-0.315501	-2.23985	2.21067	4.40497	6.00216
At5g39050	15651815	15653293	sense	MXF12.60	transferase family protein	5.49156	-4.09228	1.51295	-2.47711	0.791522	-2.00739	0		At2g26910	11488701	11495264	sense	F12C20.5	ABC transporter family protein	-0.595877	5.96081	-3.44202	-1.10001	4.08058	1.47783	5.96081
At1g01120	57269	59167	Complement	T25K16.11	fatty acid elongase3-ketoacyl-CoA synthase 1 (KCS1)	0.292948	-4.0637	-1.60535	6.22431	-3.11298	-5.43099	0		At5g15530	5038775	5040843	sense	T20K14.140	biotin carboxyl carrierprotein 2 (BCCP2)	-4.65428	5.93	-1.12689	0.371474	0.635839	3.41333	5.93
At5g17860	5902396	5904382	Complement	MVA3.210	cation exchanger putative(CAX7)	4.47252	-4.04327	2.36576	-2.65351	0.241046	-1.2417	0		At3g03770	945149	949045	Complement	F20H23.20	leucine-rich repeattransmembrane protein kinase putative	0.429836	5.90515	-2.58391	-2.78956	5.41305	1.95169	5.90515
At3g48640	18032635	18033309	Complement	T8P19.150	expressed protein	5.42483	-4.03351	-2.61697	1.67207	0.711728	-7.31821	0		At3g01980	327462	329029	Complement	F1C9.24	short-chaindehydrogenase/reductase (SDR) family protein	-1.63451	5.89317	-0.568419	-2.66697	2.83343	4.01207	5.89317
At1g70810	26707792	26708898	sense	F15H11.6	C2 domain-containing protein	2.19577	-3.99629	5.73815	-3.38491	-1.2855	0.867529	0		At3g02110	370777	373729	Complement	F1C9.10	serine carboxypeptidase S10family protein	-4.80984	5.80168	-1.17042	0.523059	0.540928	3.40227	5.80168
At3g54150	20061622	20063759	Complement	F24B22.110	embryo-abundantprotein-related	2.06855	-3.98231	-1.18069	2.92338	-1.40313	-4.77884	0		At5g45950	18651361	18653926	sense	K15I22.15	GDSL-motif lipase/hydrolasefamily protein	-3.0294	5.79911	-2.00028	0.0263179	1.67289	2.54495	5.79911
At2g05520	2026159	2027096	sense	T20G20.13	glycine-rich protein (GRP)	5.68222	-3.91658	-0.0487181	-1.01214	0.915247	-3.35711	0		At2g17470	7591587	7595090	Complement	F5J6.5	expressed protein	-1.31161	5.76805	0.0668163	-3.90954	3.21943	4.82369	5.76805
At4g16690	9392169	9393491	Complement	FCAALL.12	esterase/lipase/thioesterasefamily protein	5.37484	-3.89495	-0.611357	-0.24868	0.738142	-4.0015	0		At1g16750	5729090	5731863	Complement	F17F16.4	expressed protein	-1.55543	5.76739	-1.93576	-0.953924	2.58163	2.24235	5.76739
At4g30270	14819198	14820540	Complement	F9N11.120	MERI-5 protein (MERI-5)(MERI5B) / endo-xyloglucan transferase / xyloglucanendo-14-beta-D-glucanase (SEN4)	3.54745	-3.88459	5.20277	-4.72183	-0.237236	0.733224	0		At3g01140	46626	47912	Complement	T4P13.17	myb family transcription factor(MYB106)	-3.01298	5.75482	-0.825958	-1.1428	1.71189	3.7456	5.75482
At1g23090	8184941	8189020	Complement	T26J12.13	sulfate transporter putative	6.90574	-3.88031	1.09294	-2.95223	1.50449	-2.20869	0		At5g63410	25412211	25415379	Complement	K9H21.13	leucine-rich repeattransmembrane protein kinase putative	-1.44808	5.72921	-4.52541	0.661729	2.96919	0.661898	5.72921
At3g59110	21865697	21869181	sense	F17J16.160	protein kinase family protein	4.37033	-3.87414	0.0279145	-0.351903	0.28005	-3.24848	0		At3g25840	9453926	9458791	Complement	K9I22.6	protein kinase family protein	-2.87815	5.70427	-2.11477	0.19831	1.59698	2.23782	5.70427
At1g09970	3252242	3255695	sense	F21M12.36	leucine-rich repeattransmembrane protein kinase putative	6.30735	-3.86791	-2.3248	0.865985	1.17047	-6.51595	0		At4g37080	17473266	17476946	sense	AP22.58	expressed protein	-1.55898	5.6612	-1.96407	-1.32422	2.92232	2.56128	5.6612
At1g27730	9648128	9649060	Complement	T22C5.18	zinc finger (C2H2 type) familyprotein (ZAT10) / salt-tolerance zinc finger protein(STZ)	6.27198	-3.8494	-3.21315	1.48443	1.33089	-7.5298	0		At1g65060	24170890	24175165	Complement	F16G16.6	4-coumarate--CoA ligase 3 /4-coumaroyl-CoA synthase 3 (4CL3)	-3.77881	5.65247	-1.04916	0.0271832	0.86956	3.09814	5.65247
At5g44020	17729638	17731563	sense	MRH10.13	acid phosphatase class B familyprotein	5.81453	-3.8333	-3.9621	2.36842	1.12261	-8.97914	0		At2g40610	16955941	16957635	Complement	T2P4.4	expansin putative (EXP8)	-0.232136	5.58595	-0.304365	-4.7446	4.29316	4.2118	5.58595
At5g09440	2938348	2939462	sense	T5E8.240	phosphate-responsive proteinputative	6.69265	-3.82972	-0.980154	-0.826564	1.56656	-4.32663	0		At2g22420	9520299	9521615	sense	F14M13.18	peroxidase 17 (PER17) (P17)	-1.03809	5.57147	-1.91098	-1.75017	3.3122	2.47448	5.57147
At2g40460	16903985	16908358	sense	T2P4.19	proton-dependent oligopeptidetransport (POT) family protein	0.681786	-3.81193	6.39995	-2.35623	-2.55524	1.3994	0		At1g52690	19623413	19625202	sense	F6D8.9	late embryogenesis abundantprotein putative / LEA protein putative	-1.63246	5.56638	-0.720639	-2.35954	2.7082	3.67109	5.56638
At3g18800	6479694	6480384	sense	MVE11.18	expressed protein	5.05056	-3.762	-2.164	1.22719	0.744976	-5.85201	0		At2g01150	100648	101494	sense	F10A8.3	zinc finger (C3HC4-type RINGfinger) family protein	-2.19416	5.54584	-2.51269	-0.124774	2.23416	1.9926	5.54584
At5g40780	16340879	16344502	sense	K1B16.3	lysine and histidine specifictransporter putative	5.19944	-3.75552	-2.8405	1.75369	0.817928	-6.98175	0		At3g01860	302744	304473	sense	F28J7.19	expressed protein	-0.0752416	5.50061	-3.76285	-1.17392	4.45423	1.07885	5.50061
At3g16120	5464775	5465537	sense	MSL1.16	dynein light chain putative	0.297744	-3.75049	4.95258	-1.03673	-2.858	0.633825	0		At3g58080	21521283	21521539	Complement	T10K17.290	hypothetical protein	-1.56126	5.49526	-0.32799	-2.75652	2.66729	4.03746	5.49526
At2g22990	9793396	9797259	sense	F21P24.5	sinapoylglucose:malatesinapoyltransferase (SNG1)	6.25202	-3.74128	-3.64106	1.82208	1.33121	-8.53031	0		At1g66430	24781959	24784278	sense	T27F4.17	pfkB-type carbohydrate kinasefamily protein	-2.48001	5.46089	-2.30533	0.0228471	1.92413	2.09319	5.46089
At5g61670	24800764	24803171	sense	K11J9.20	expressed protein	3.83713	-3.71568	-0.110373	0.0595722	0.0426599	-3.22974	0		At2g22960	9777974	9780012	sense	F21P24.2	serine carboxypeptidase S10family protein	-1.60742	5.44363	-2.68343	-0.176645	2.42169	1.54	5.44363
At5g50800	20682303	20684530	Complement	MFB16.8	nodulin MtN3 family protein	3.33548	-3.7078	5.87035	-5.26086	-0.277435	1.21546	0		At3g56100	20828053	20830496	Complement	F18O21.60	leucine-rich repeattransmembrane protein kinase putative	-3.1833	5.43087	-2.03977	0.567812	1.20029	2.09641	5.43087
At4g26590	13413979	13417061	Complement	T15N24.40	oligopeptide transporter OPTfamily protein	-1.18307	-3.69395	1.11261	3.83365	-4.48454	-2.06384	0		At1g11410	3841286	3844432	sense	T23J18.8	S-locus protein kinaseputative	0.543323	5.41624	-2.42415	-2.96391	5.20268	2.0027	5.41624
At4g30490	14899041	14902150	Complement	F17I23.170	AFG1-like ATPase familyprotein	0.606752	-3.68251	7.4974	-2.64822	-2.4841	1.68218	0		At2g40540	16937942	16941666	sense	T2P4.11	potassium transporter putative(KT2)	-2.02748	5.40689	-2.67855	-0.0306719	2.28216	1.76401	5.40689
At2g41110	17147391	17148763	sense	T3K9.12	calmodulin-2/3/5 (CAM2) (CAL1)	0.484729	-3.68053	4.21883	-0.746191	-2.49507	0.223319	0		At3g24640	8992296	8992768	sense	MSD24.4	hypothetical protein	-2.72675	5.4025	-0.255253	-1.67585	1.66974	4.10789	5.4025
At2g47800	19582014	19587647	sense	F17A22.19	glutathione-conjugatetransporter (MRP4)	3.96916	-3.67162	2.62231	-2.80786	0.165862	-0.796026	0		At4g39070	18204849	18206504	Complement	F19H22.170	zinc finger (B-box type)family protein	-1.42105	5.3101	-1.28578	-1.81967	2.76513	2.91614	5.3101
At5g04340	1216132	1217107	Complement	T19N18.70	zinc finger (C2H2 type) familyprotein	3.91483	-3.66552	3.21252	-3.36875	0.140286	-0.364538	0		At4g14440	8306741	8307749	Complement	FCAALL.212	enoyl-CoA hydratase/isomerasefamily protein	-4.35599	5.27009	-3.69345	2.88027	0.541004	0.99342	5.27009
At2g36950	15522212	15524010	sense	T1J8.13	heavy-metal-associateddomain-containing protein	3.95907	-3.62668	0.118303	-0.330563	0.184526	-2.96158	0		At2g44740	18449064	18450471	Complement	F16B22.23	cyclin family protein	-1.6493	5.26001	-1.63916	-1.2225	2.52809	2.5573	5.26001
At5g59310	23942311	23943078	Complement	MNC17.4	lipid transfer protein 4 (LTP4)	8.08345	-3.62174	-5.69399	2.20439	2.39263	-11.4486	0		At5g37550	14936131	14937022	Complement	MPA22.10	expressed protein	-0.115955	5.24717	-2.70021	-1.71036	4.12149	1.57397	5.24717
At4g15530	8864826	8870934	Complement	FCAALL.325	pyruvate phosphate dikinasefamily protein	5.46894	-3.60439	3.52322	-5.28757	1.02954	-0.0830375	0		At1g65560	24375050	24377443	Complement	F5I14.9	allyl alcohol dehydrogenaseputative	-1.02347	5.24197	-3.48124	-0.145	3.04318	1.00921	5.24197
At2g04160	1401447	1407691	Complement	F3L12.2	subtilisin-like protease (AIR3)	4.71813	-3.60107	2.48872	-3.37093	0.666527	-0.844168	0		At5g35670	13873345	13875756	sense	MJE4.5	calmodulin-binding family protein	-2.07403	5.18621	-2.61493	0.103495	2.09842	1.67838	5.18621
At2g40670	16977336	16978198	sense	T7D17.15	two-component responsiveregulator / response regulator 16 (ARR16)	-0.328041	-3.58464	7.09926	-1.51237	-3.3961	1.59901	0		At5g09520	2958293	2958857	Complement	F17I14.290	hydroxyproline-richglycoprotein family protein	-1.96765	5.1204	-0.246304	-2.18556	2.0971	3.8878	5.1204
At2g16630	7216321	7218104	sense	T24I21.4	proline-rich family protein	1.03835	-3.57959	-1.59288	4.35718	-1.99613	-4.98082	0		At1g74030	27842845	27845592	Complement	F2P9.10	enolase putative	-4.70314	5.10662	-0.435178	0.157978	0.234463	3.68987	5.10662
At4g33790	16204159	16207947	Complement	T16L1.280	acyl CoA reductase putative	4.43933	-3.56782	-4.71534	3.79086	0.50564	-12.4467	0		At1g24010	8498792	8499488	Complement	T23E23.27	expressed protein	-1.55365	5.0523	-1.44368	-1.33641	2.45889	2.5826	5.0523
At3g57480	21288917	21290331	Complement	T8H10.80	zinc finger (C2H2 typeAN1-like) family protein	0.314629	-3.56579	-1.16293	4.78916	-2.70586	-4.34594	0		At5g13140	4170563	4171797	Complement	T19L5.100	expressed protein	-2.42067	5.01239	-2.87176	0.767955	1.67291	1.35243	5.01239
At1g03710	923487	924657	sense	F21B7.31	expressed protein	-2.1906	-3.55473	1.56218	4.42431	-5.75893	-1.55194	0		At4g16155	9153386	9157278	Complement	FCAALL.61	dihydrolipoamide dehydrogenase2 plastidic / lipoamide dehydrogenase 2 (PTLPD2)	-0.502133	5.00019	-1.83216	-1.58572	3.22387	1.83903	5.00019
At1g23040	8164948	8165851	sense	T26J12.18	hydroxyproline-richglycoprotein family protein	3.48868	-3.55458	3.98693	-3.83651	-0.0678238	0.242167	0		At4g00950	405673	407142	Complement	T18A10.4	expressed protein	-1.63499	4.99481	-1.56568	-1.18716	2.42424	2.50552	4.99481
At5g11950	3854917	3856977	sense	F14F18.120	expressed protein	-2.49842	-3.55449	2.5328	3.58655	-6.64309	-0.748388	0		At2g10940	4317494	4319185	Complement	F15K19.1	protease inhibitor/seedstorage/lipid transfer protein (LTP) family protein	-0.422504	4.97782	-1.19231	-2.87286	3.65907	2.8669	4.97782
At1g72290	27219451	27220453	sense	T9N14.19	trypsin and protease inhibitorfamily protein / Kunitz family protein	-1.4338	-3.5428	-3.75997	18.6624	-4.54225	-7.47005	0		At1g12845	4378937	4379514	Complement	F13K23.24	expressed protein	-2.48743	4.96672	-3.78852	1.52963	1.68864	0.762816	4.96672
At1g04040	1042361	1043861	Complement	F21M11.2	acid phosphatase class B familyprotein	2.81677	-3.53992	-2.99197	3.72825	-0.507561	-7.46681	0		At1g12570	4278000	4280860	Complement	F5O11.31	glucose-methanol-choline (GMC)oxidoreductase family protein	-1.86982	4.96142	-0.0750601	-2.5894	2.28647	4.08297	4.96142
At1g75750	28445202	28446023	Complement	F10A5.6	gibberellin-regulated protein 1(GASA1) / gibberellin-responsive protein 1	6.98944	-3.53408	2.41707	-5.09963	1.79395	-0.835702	0		At2g47930	19624045	19624751	Complement	F17A22.32	hydroxyproline-richglycoprotein family protein	-2.4839	4.91529	-1.62525	-0.284784	1.63439	2.39151	4.91529
At3g21200	7436078	7438419	sense	MXL8.5	expressed protein	0.194134	-3.51985	5.23436	-1.09811	-2.74046	0.774149	0		At1g25450	8938466	8940374	Complement	F2J7.9	very-long-chain fatty acidcondensing enzyme putative	-1.73924	4.88958	-1.10396	-1.52319	2.30635	2.91828	4.88958
At3g51570	19137337	19141435	sense	F26O13.210	disease resistance protein(TIR-NBS-LRR class) putative	4.03238	-3.49336	-2.52068	2.05977	0.340994	-5.93624	0		At5g22740	7554931	7560076	Complement	MDJ22.16	glycosyl transferase family 2protein	-2.96211	4.88162	-2.80165	1.25724	1.18513	1.32914	4.88162
At2g37770	15841961	15844079	sense	T8P21.32	aldo/keto reductase familyprotein	6.86261	-3.4887	1.63301	-4.0954	1.87202	-1.45913	0		At3g26910	9916415	9919976	Complement	MDJ14.25	hydroxyproline-rich glycoproteinfamily protein	-2.79326	4.83768	-3.37188	1.55877	1.37008	0.971174	4.83768
At1g54020	20165340	20167406	Complement	F15I1.10	myrosinase-associated proteinputative	-2.46412	-3.48686	-0.465029	11.894	-6.37777	-3.46757	0		At1g24530	8693214	8694692	sense	F21J9.19	transducin family protein /WD-40 repeat family protein	-0.942418	4.83193	-1.48487	-1.88513	3.00793	2.49892	4.83193
At5g62740	25218173	25219982	sense	MQB2.40	band 7 family protein	1.16319	-3.46828	-1.18399	3.50713	-1.82811	-4.2693	0		At5g62210	25003553	25004715	Complement	MTG10.26	embryo-specific protein-related	-4.04486	4.82725	-2.14744	1.54661	0.462148	1.83728	4.82725
At3g48710	18051962	18055173	sense	T8P19.220	expressed protein	9.1804	-3.46617	0.749313	-3.90373	2.51535	-2.20912	0		At1g34430	12587730	12590120	Complement	F12K21.24	dihydrolipoamideS-acetyltransferase putative	-2.3002	4.81266	-1.3193	-0.558913	1.63116	2.51199	4.81266
At1g29670	10375753	10378144	sense	F15D2.22	GDSL-motif lipase/hydrolasefamily protein	7.23098	-3.46171	-5.3211	2.29605	2.01374	-11.3328	0		At1g04430	1198136	1201526	sense	F19P19.11	dehydration-responsiveprotein-related	-1.49793	4.80074	-0.549943	-2.16735	2.37202	3.34491	4.80074
At1g13990	4794761	4796594	sense	F7A19.8	expressed protein	6.51359	-3.44831	1.83425	-4.12398	1.71597	-1.2657	0		At1g21060	7371788	7374093	sense	T22I11.12	expressed protein	0.0159058	4.7982	-2.22135	-1.951	3.93788	1.65419	4.7982
At5g59320	23946197	23946965	sense	MNC17.10	lipid transfer protein 3 (LTP3)	5.557	-3.43827	-7.13989	4.53223	1.30436	-16.3026	0		At1g11850	3999201	3999875	sense	F12F1.31	expressed protein	-2.18522	4.77761	-1.13268	-1.03691	1.89018	2.85285	4.77761
														At1g79160	29784614	29785599	Complement	YUP8H12R.23	expressed protein	-2.2405	4.77165	-1.50125	-0.562469	1.78579	2.45016	4.77165
														At4g24510	12660759	12662666	sense	F22K18.290	eceriferum protein (CER2)	-1.67462	4.76397	-2.63447	-0.0824494	2.30417	1.51321	4.76397
														At4g16442	9271887	9273111	Complement	FCAALL.228	integral membrane familyprotein	0.0272987	4.76212	-4.37719	-0.317686	3.9534	0.250847	4.76212
														At5g08640	2803959	2805448	sense	MAH20.20	flavonol synthase 1 (FLS1)	-2.30359	4.73639	-3.17937	1.04862	1.66604	1.0223	4.73639
														At5g23860	8042886	8044822	sense	MRO11.10	tubulin beta-8 chain (TUB8)(TUBB8)	-2.33482	4.71058	-1.31847	-0.573137	1.63262	2.5446	4.71058
														At1g27940	9733584	9738116	Complement	F13K9.5	multidrug resistanceP-glycoprotein putative	0.515528	4.70869	-2.69372	-2.19453	4.56804	1.41361	4.70869
														At3g06780	2143494	2144527	sense	F3E22.8	glycine-rich protein	-1.0897	4.70237	-3.03622	-0.160936	2.70199	1.08024	4.70237
														At4g03060	1351687	1354023	Complement	T4I9.6	2-oxoglutarate-dependentdioxygenase putative (AOP2)	-2.17309	4.6942	-0.0782282	-1.71721	1.54175	3.70966	4.6942
														At3g61490	22769038	22771167	sense	F2A19.90	glycoside hydrolase family 28protein / polygalacturonase (pectinase) family protein	-0.519946	4.6917	-2.60159	-1.1735	3.35866	1.47332	4.6917
														At3g19420	6731463	6735629	sense	MLD14.22	expressed protein	-1.42442	4.68372	-0.576141	-2.08097	2.32486	3.20081	4.68372
														At1g11300	3794389	3800719	sense	T28P6.6	S-locus lectin protein kinasefamily protein	-0.80868	4.68235	-1.26871	-1.8254	2.80913	2.34996	4.68235
														At3g20790	7268768	7271517	sense	MOE17.10	oxidoreductase family protein	-1.4301	4.67094	-1.77074	-0.874668	2.3214	2.0322	4.67094
														At5g47820	19383709	19389978	sense	MCA23.16	kinesin-like protein (FRA1)	-1.09904	4.65292	-2.69462	-0.400789	2.65611	1.30174	4.65292
														At4g25960	13177475	13183564	sense	F14M19.5	multidrug resistanceP-glycoprotein putative	-3.10642	4.6505	-3.1664	1.79164	1.01676	1.00355	4.6505
														At2g19170	8320584	8325678	Complement	T20K24.19	subtilase family protein	-3.75102	4.64066	-2.23946	1.49525	0.576199	1.7194	4.64066
														At3g18820	6484107	6486252	sense	MVE11.21	Ras-related GTP-binding proteinputative	-3.40292	4.62291	-1.53925	0.655468	0.724779	2.18724	4.62291
														At3g17820	6097420	6099601	sense	MEB5.4	glutamine synthetase (GS1)	-1.20124	4.62158	0.0903056	-3.05513	2.48891	3.93573	4.62158
														At2g20240	8734713	8737581	Complement	F11A3.21	expressed protein	-2.31878	4.59737	-2.90984	0.925172	1.56453	1.13906	4.59737
														At2g05990	2322219	2325143	sense	T6P5.19	enoyl-[acyl-carrier protein]reductase [NADH] chloroplast putative / NADH-dependentenoyl-ACP reductase putative	-4.23131	4.59633	-1.37018	1.06637	0.239782	2.42721	4.59633
														At1g67560	25323562	25327927	sense	F12B7.11	lipoxygenase family protein	-0.666837	4.56309	-2.94269	-0.589253	3.06535	1.09068	4.56309
														At1g10640	3515366	3516975	Complement	F20B24.8	polygalacturonase putative /pectinase putative	-1.2659	4.54756	-3.63595	0.578061	2.42021	0.581512	4.54756
														At5g24570	8405684	8406135	Complement	K18P6.10	expressed protein	-0.156478	4.5433	-2.13436	-1.87077	3.63965	1.75033	4.5433
														At5g50335	20506320	20506953	Complement	MXI22.20	expressed protein	-0.578488	4.50022	-1.02639	-2.57624	3.19131	2.75886	4.50022
														At1g64405	23927395	23927999	sense	F15H21.22	expressed protein	-2.48288	4.49285	-2.48161	0.802467	1.34688	1.3714	4.49285
														At5g13930	4488692	4490266	sense	MAC12.28	chalcone synthase /naringenin-chalcone synthase	-2.29182	4.483	-2.82969	0.890867	1.54475	1.15205	4.483
														At5g35360	13601389	13606337	sense	T26D22.8	acetyl-CoA carboxylase biotincarboxylase subunit (CAC2)	-3.34029	4.47491	-1.32175	0.535206	0.648658	2.23303	4.47491
														At1g78050	29352475	29355175	sense	F28K19.30	phosphoglycerate/bisphosphoglycerate mutase familyprotein	-2.67707	4.46644	0.135129	-1.56634	1.22747	3.90431	4.46644
														At1g64390	23914782	23918892	sense	F15H21.9	endo-14-beta-glucanaseputative / cellulase putative	-2.58324	4.44136	-3.01391	1.39689	1.21728	0.927745	4.44136
														At5g41050	16450545	16451546	Complement	MEE6.12	expressed protein	-0.00567904	4.44091	-2.60405	-1.47954	3.71507	1.2788	4.44091
														At5g16590	5431684	5434113	sense	MTG13.3	leucine-rich repeat transmembraneprotein kinase putative	-1.54336	4.44077	-1.74985	-0.695062	2.12535	1.96163	4.44077
														At1g17430	5982260	5984004	sense	F1L3.12	hydrolase alpha/beta fold familyprotein	-1.92143	4.43016	0.0163669	-2.08439	1.76887	3.71961	4.43016
														At4g18030	10012373	10015688	Complement	T6K21.210	dehydration-responsive familyprotein	-1.22723	4.42914	-3.5895	0.568203	2.39759	0.557769	4.42914
														At5g11260	3593415	3594993	Complement	F2I11.150	bZIP protein HY5 (HY5)	-0.861624	4.42329	-1.8377	-1.17334	2.68481	1.79044	4.42329
														At1g22060	7773052	7780575	Complement	F2E2.13	expressed protein	-1.09867	4.37549	-2.91144	-0.00221527	2.43285	0.946959	4.37549
														At3g16140	5468515	5469482	Complement	MSL1.18	photosystem I reaction centersubunit VI chloroplast putative / PSI-H putative(PSAH1)	-1.1505	4.34889	-1.14429	-1.4672	2.32893	2.34535	4.34889
														At5g52920	21480769	21484043	sense	MXC20.15	pyruvate kinase putative	-2.6027	4.32593	-2.19422	0.717137	1.2096	1.55551	4.32593
														At1g06000	1820307	1821892	Complement	T21E18.5	UDP-glucoronosyl/UDP-glucosyltransferase family protein	-2.90682	4.32585	-2.63234	1.37692	0.982619	1.21287	4.32585
														At3g12680	4025086	4029147	Complement	MBK21.4	floral homeotic protein (HUA1)	-1.82485	4.32476	-2.45938	0.268742	1.81447	1.32019	4.32476
														At4g22010	11663336	11666727	sense	F1N20.110	multi-copper oxidase type Ifamily protein	-3.44209	4.31527	-1.16231	0.495242	0.55406	2.38622	4.31527
														At4g19380	10568376	10572423	Complement	T5K18.160	alcohol oxidase-related	0.0227451	4.29361	-1.92589	-2.0592	3.63586	1.74424	4.29361
														At5g41060	16452596	16454927	sense	MEE6.13	zinc finger (DHHC type) familyprotein	-2.05163	4.28636	-2.65976	0.708708	1.5594	1.11062	4.28636
														At1g01630	229057	230917	sense	T1N6.1	SEC14 cytosolic factor putative /phosphoglyceride transfer protein putative	0.550861	4.28633	-3.2032	-1.45484	4.24785	0.768911	4.28633
														At5g39220	15723044	15725454	sense	K3K3.12	hydrolase alpha/beta fold familyprotein	-4.02386	4.28422	-1.59657	1.35932	0.177111	1.97636	4.28422
														At1g76550	28727596	28731900	Complement	F14G6.15	pyrophosphate--fructose-6-phosphate 1-phosphotransferasealpha subunit putative / pyrophosphate-dependent6-phosphofructose-1-kinase putative	-3.96453	4.27181	-0.433545	0.196816	0.199541	3.08133	4.27181
														At1g01900	310318	313130	sense	F22M8.3	subtilase family protein	-1.19918	4.2632	-0.591753	-2.05583	2.31232	2.92729	4.2632
														At2g17300	7529547	7530018	Complement	F5J6.6	expressed protein	-0.492616	4.25488	-2.13946	-1.31868	3.07368	1.57599	4.25488
														At1g62640	23195951	23198768	sense	T3P18.20	3-oxoacyl-[acyl-carrier-protein]synthase III chloroplast / beta-ketoacyl-ACP synthase III/ 3-ketoacyl-acyl carrier protein synthase III (KAS III)	-2.49658	4.24867	-1.10853	-0.297153	1.20698	2.41642	4.24867
														At3g26560	9751166	9755009	Complement	MFE16.8	ATP-dependent RNA helicaseputative	-2.75685	4.23712	-0.245185	-0.979727	1.05781	3.32555	4.23712
														At2g43360	18017828	18020315	Complement	T1O24.10	biotin synthase (BioB) (BIO2)	-3.9511	4.23592	-1.88961	1.6172	0.201919	1.74329	4.23592
														At1g33990	12355548	12358237	sense	F12G12.19	hydrolase alpha/beta foldfamily protein	0.232133	4.23226	-2.06448	-2.04363	3.81796	1.53559	4.23226
														At4g14010	8092832	8093377	Complement	FCAALL.140	rapid alkalinization factor(RALF) family protein	-1.51518	4.22694	-1.85761	-0.444705	1.98171	1.7056	4.22694
														At1g21590	7566221	7569890	Complement	F24J8.18	protein kinase family protein	-0.778004	4.21522	-3.81797	0.425003	2.71887	0.301537	4.21522
														At1g13700	4694472	4696015	Complement	F21F23.14	glucosamine/galactosamine-6-phosphate isomerase familyprotein	-1.13947	4.21134	-1.36084	-1.25697	2.31015	2.1215	4.21134
														At5g07110	2206001	2207153	sense	MOJ9.28	prenylated rab acceptor (PRA1)family protein	0.267446	4.20962	-1.11107	-3.14287	3.84907	2.39533	4.20962
														At2g30520	13009819	13012672	Complement	T6B20.13	signal transducer of phototropicresponse (RPT2)	0.193717	4.20581	-0.530097	-3.84801	3.79335	3.08696	4.20581
														At5g44260	17846853	17848452	Complement	MLN1.21	zinc finger (CCCH-type) familyprotein	-1.88838	4.20319	-0.638962	-1.34957	1.72823	2.89243	4.20319
														At4g01080	466391	468293	Complement	F2N1.14	expressed protein	-0.159064	4.20076	-3.20748	-0.653176	3.35863	0.702127	4.20076
														At2g17230	7501618	7503098	Complement	T23A1.9	phosphate-responsive 1 familyprotein	-0.496854	4.19612	-3.15059	-0.374306	3.01725	0.753854	4.19612
														At1g22170	7826278	7828307	sense	F16L1.10	phosphoglycerate/bisphosphoglycerate mutase familyprotein	-2.59615	4.179	-0.783706	-0.44019	1.05486	2.6484	4.179
														At3g17100	5831259	5832425	sense	K14A17.17	expressed protein	-1.60479	4.17217	-2.46516	0.160684	1.92306	1.23331	4.17217
														At3g59390	21957095	21959349	sense	F25L23.250	expressed protein	-2.32912	4.17059	-3.21542	1.4724	1.32172	0.685006	4.17059
														At1g60030	22117531	22120510	Complement	T2K10.8	xanthine/uracil permease familyprotein	-0.141599	4.14009	-2.02792	-1.5119	3.25584	1.42726	4.14009
														At4g38770	18096803	18098558	Complement	T9A14.50	proline-rich family protein(PRP4)	-0.53654	4.13808	-2.06848	-1.14747	2.87789	1.46995	4.13808
														At4g28040	13940607	13942829	sense	T13J8.150	nodulin MtN21 family protein	-0.177592	4.13301	-1.73177	-1.89545	3.2815	1.78994	4.13301
														At1g06840	2097746	2103478	Complement	F4H5.8	leucine-rich repeat transmembraneprotein kinase putative	-2.16838	4.08782	-0.86659	-0.700174	1.35298	2.52709	4.08782
														At5g19340	6515094	6516207	Complement	F7K24.90	expressed protein	-3.55084	4.05488	-1.28358	0.847038	0.353463	2.1575	4.05488
														At1g48100	17770543	17774255	sense	F21D18.18	glycoside hydrolase family 28protein / polygalacturonase (pectinase) family protein	-2.48787	4.04824	-1.78543	0.477992	1.08292	1.66954	4.04824
														At3g63140	23337347	23339684	Complement	T20O10.240	mRNA-binding proteinputative	-1.49399	4.03483	-0.531895	-1.57653	1.8412	2.78382	4.03483
														At3g53770	19934306	19934804	sense	F5K20.70	late embryogenesis abundantprotein-related / LEA protein-related	-1.30661	3.98086	-0.959281	-1.36372	2.0352	2.37355	3.98086
														At3g07180	2282094	2285519	Complement	T1B9.16	GPI transamidase componentPIG-S-related	-1.97602	3.96889	-1.30362	-0.381489	1.44526	2.04695	3.96889
														At4g30340	14838315	14841073	Complement	F17I23.320	diacylglycerol kinase familyprotein	-1.32273	3.96298	-1.6689	-0.536961	1.91604	1.62706	3.96298
														At1g25510	8959181	8960835	Complement	F2J7.6	aspartyl protease family protein	-1.61999	3.94628	-3.75302	1.3978	1.78693	0.181643	3.94628
														At1g69420	26096859	26100570	sense	F23O10.1	zinc finger (DHHC type) familyprotein	-2.65008	3.94485	-3.81733	2.46304	0.939249	0.139087	3.94485
														At2g42620	17763217	17765545	sense	F14N22.11	F-box family protein (ORE9)	-2.00095	3.93137	-1.3393	-0.34597	1.44693	2.03457	3.93137
														At5g48570	19707768	19711071	Complement	K15N18.12	peptidyl-prolyl cis-transisomerase putative / FK506-binding protein putative	-2.44062	3.90955	-2.57045	1.26866	0.993869	0.921376	3.90955
														At1g12230	4148032	4151023	sense	T28K15.4	transaldolase putative	-1.74937	3.90362	-2.31557	0.416069	1.56154	1.12304	3.90362
														At5g40760	16327976	16332002	sense	MNF13.6	glucose-6-phosphate1-dehydrogenase / G6PD (ACG12)	-2.13371	3.90144	0.227669	-1.75102	1.30143	3.55272	3.90144
														At5g50390	20538015	20540206	Complement	MXI22.11	pentatricopeptide (PPR)repeat-containing protein	-2.30041	3.88735	-0.596474	-0.68555	1.10492	2.63519	3.88735
														At2g46225	18989009	18991349	sense	T3F17.47	expressed protein	-2.30279	3.88317	-2.58421	1.17843	1.07887	0.892599	3.88317
														At5g09980	3122757	3123909	sense	MYH9.20	expressed protein	-2.12096	3.87105	-2.71936	1.08887	1.28634	0.843882	3.87105
														At1g75680	28420713	28423190	Complement	F10A5.13	glycosyl hydrolase family 9protein	-2.26232	3.85581	-2.3426	0.918912	1.13786	1.09674	3.85581
														At1g64970	24137050	24139723	Complement	F13O11.27	expressed protein	-0.0401902	3.84818	-1.27636	-2.28084	3.20535	1.98857	3.84818
														At4g28160	13980385	13981007	sense	F26K10.40	hydroxyproline-richglycoprotein family protein	-1.69024	3.84578	0.402901	-2.34738	1.63998	3.70096	3.84578
														At5g25460	8863393	8865680	sense	F18G18.200	expressed protein	0.0139527	3.8256	-3.2861	-0.493824	3.25331	0.414302	3.8256
														At5g05270	1563321	1565008	sense	K18I23.7	chalcone-flavanone isomerasefamily protein	-3.50229	3.82054	-1.15553	0.87106	0.230085	2.09809	3.82054
														At1g12430	4233871	4238757	Complement	F5O11.15	armadillo/beta-catenin repeatfamily protein / kinesin motor family protein	-1.79499	3.79691	-2.98775	1.07886	1.49039	0.588858	3.79691
														At2g38040	15924196	15928247	sense	T8P21.5	acetyl co-enzyme A carboxylasecarboxyltransferase alpha subunit family	-2.07234	3.76722	-1.21682	-0.265992	1.26982	2.02116	3.76722
														At4g11820	7108909	7112474	Complement	T26M18.30	hydroxymethylglutaryl-CoAsynthase / HMG-CoA synthase / 3-hydroxy-3-methylglutarylcoenzyme A synthase	-3.11747	3.76443	-0.539777	0.00832532	0.453153	2.63002	3.76443
														At1g52910	19711729	19712991	sense	F14G24.18	expressed protein	-2.00076	3.76279	-0.538095	-0.98708	1.31956	2.64923	3.76279
														At1g09390	3031205	3033941	sense	F14J9.5	GDSL-motif lipase/hydrolasefamily protein	-0.879379	3.75405	-3.05815	0.281574	2.26582	0.51128	3.75405
														At5g42280	16922713	16925235	Complement	K5J14.8	DC1 domain-containing protein	-3.16324	3.74713	-0.851303	0.362025	0.408432	2.30792	3.74713
														At5g67070	26785321	26786072	sense	K21H1.3	rapid alkalinization factor(RALF) family protein	-3.43961	3.74634	-3.4266	3.05584	0.228219	0.263733	3.74634
														At5g15780	5144730	5146369	Complement	F14F8.160	pollen Ole e 1 allergen andextensin family protein	-1.86869	3.74624	0.261255	-1.88007	1.37617	3.4542	3.74624
														At1g78570	29554589	29557659	sense	T30F21.10	NAD-dependentepimerase/dehydratase family protein	-3.10967	3.74245	-1.95961	1.37956	0.450658	1.34787	3.74245
														At2g16900	7330697	7333303	Complement	F12A24.8	expressed protein	-0.559773	3.70108	-2.19599	-0.761962	2.58332	1.14813	3.70108
														At3g03450	819344	821413	Complement	T21P5.13	gibberellin response modulatorputative / gibberellin-responsive modulator putative	-0.159574	3.68824	-1.29419	-2.00787	2.95512	1.86916	3.68824
														At1g20010	6937786	6940573	Complement	T20H2.21	tubulin beta-5 chain (TUB5)	-0.971059	3.6832	-3.45004	0.721713	2.18116	0.211167	3.6832
														At3g09880	3029516	3032261	sense	F8A24.7	serine/threonine proteinphosphatase 2A (PP2A) regulatory subunit B' (B'beta)	-2.26883	3.68199	0.421437	-1.50008	0.911379	3.60252	3.68199
														At2g27920	11892648	11896216	Complement	T1E2.16	serine carboxypeptidase S10family protein	-0.272862	3.6744	-0.203292	-3.00287	2.7446	2.82665	3.6744
														At2g46930	19290588	19293416	sense	F14M4.24	pectinacetylesterase putative	0.355959	3.64339	-3.36446	-0.623897	3.48224	0.230582	3.64339
														At3g22930	8124090	8125938	Complement	F5N5.10	calmodulin putative	-2.41033	3.63986	-1.66539	0.555815	0.922444	1.54995	3.63986
														At5g16390	5360812	5363129	Complement	MQK4.12	biotin carboxyl carrier protein 1(BCCP1)	-1.70709	3.63833	-1.90498	0.251868	1.37229	1.22969	3.63833
														At3g15510	5243518	5245389	sense	MJK13.17	no apical meristem (NAM) familyprotein (NAC2)	-1.34894	3.63599	0.179686	-2.27374	1.78037	3.27766	3.63599
														At4g30290	14828718	14830022	Complement	F17I23.370	xyloglucan:xyloglucosyltransferase putative / xyloglucan endotransglycosylaseputative / endo-xyloglucan transferase putative	-1.18185	3.6316	-0.336555	-1.84272	1.8899	2.71615	3.6316
														At1g53520	19980083	19981623	Complement	T3F20.16	chalcone-flavanoneisomerase-related	-2.49421	3.62649	-2.60908	1.58204	0.753991	0.690491	3.62649
														At3g18310	6284362	6287150	Complement	MYF24.3	expressed protein	0.341094	3.62322	-2.79436	-1.08207	3.44558	0.635349	3.62322
														At5g57030	23094491	23097262	sense	MHM17.16	lycopene epsilon cyclase	-0.431824	3.61565	-0.96267	-1.93273	2.57874	2.06522	3.61565
														At2g02780	781846	784645	Complement	T20F6.8	leucine-rich repeat transmembraneprotein kinase putative	-3.17273	3.61089	-1.12223	0.760127	0.292924	1.90128	3.61089
														At4g35110	16712467	16714958	Complement	M4E13.160	expressed protein	0.283698	3.58276	2.07594	-7.59854	3.34738	5.48427	0
														At1g17745	6100957	6105258	sense	F11A6.8	D-3-phosphoglyceratedehydrogenase / 3-PGDH	0.0647457	3.58365	-4.01238	0.147387	3.09746	-0.183094	0
														At1g60590	22317835	22320635	Complement	F8A5.12	polygalacturonase putative /pectinase putative	2.28582	3.59994	-3.9695	-2.06105	6.08523	-0.170609	0
														At1g65445	24319477	24320415	sense	T8F5.28	transferase-related	-1.70178	3.60078	-3.68642	1.69874	1.46358	-5.67e-05	0
														At2g42570	17724453	17727158	Complement	F14N22.16	expressed protein	-3.6148	3.61252	-2.28781	2.22481	0.0241645	0.996658	0
														At1g59640	21912842	21914866	Complement	T30E16.21	basic helix-loop-helix (bHLH)family protein	-2.37062	3.61577	3.31889	-4.80471	0.864308	8.52427	0
														At5g43760	17602990	17605824	sense	MQD19.11	beta-ketoacyl-CoA synthaseputative	-0.0983268	3.63128	-6.09111	1.68966	2.99033	-1.36584	0
														At1g60010	22099025	22100242	Complement	T2K10.6	expressed protein	0.560973	3.66061	-1.54365	-2.54626	3.71813	1.65635	0
														At3g28140	10471638	10472625	sense	MMG15.17	calmodulin-binding protein	1.44388	3.68817	-0.658929	-4.82778	4.81395	2.48024	0
														At4g19430	10598456	10599155	Complement	T5K18.210	expressed protein	2.73261	3.71802	-5.59938	-1.38343	6.52323	-1.08307	0
														At1g74670	28056960	28057810	sense	F1M20.35	gibberellin-responsive proteinputative	4.46381	3.72511	-2.15856	-6.75996	9.66056	1.1923	0
														At4g22200	11746525	11750710	Complement	T10I14.30	potassium channel protein 2(AKT2) (AKT3)	2.59061	3.72988	-3.00464	-3.34684	6.82111	0.539758	0
														At1g68780	25835466	25837507	Complement	F14K14.11	leucine-rich repeat familyprotein	0.568927	3.78899	-3.41539	-0.921788	3.85804	0.301954	0
														At1g12000	4049894	4053833	Complement	F12F1.13	pyrophosphate--fructose-6-phosphate 1-phosphotransferasebeta subunit putative / pyrophosphate-dependent6-phosphofructose-1-kinase putative	-4.06774	3.78919	-1.27254	1.4368	-0.149905	1.974	0
														At3g05020	1391658	1392960	Complement	T9J14.3	acyl carrier protein 1chloroplast (ACP-1)	-3.86355	3.81406	-0.0530243	0.0669716	-0.0124485	3.1372	0
														At1g16705	5712081	5713742	sense	F17F16.9	p300/CBPacetyltransferase-related protein-related	-5.56587	3.8202	0.962772	-0.00328898	-0.815229	4.42096	0
														At3g56700	21010710	21013037	Complement	T8M16.30	male sterility proteinputative	-2.88595	3.83404	2.44857	-3.33653	0.661894	6.67954	0
														At1g29050	10136217	10139194	Complement	F28N24.24	expressed protein	-2.39597	3.8388	2.57891	-4.05693	1.05042	6.67446	0
														At5g39860	15974645	15975683	sense	MYH19.1	bHLH protein	-1.40229	3.85975	-3.97048	1.41558	1.86445	-0.0129549	0
														At1g12080	4084203	4085041	sense	F12F1.4	expressed protein	-0.90694	3.86751	0.680172	-3.59124	2.3613	4.03242	0
														At1g14280	4877622	4879144	sense	F14L17.4	phytochrome kinase putative	2.72406	3.88025	-3.95967	-2.7237	6.84541	0.00324514	0
														At5g16240	5306810	5309935	sense	T21H19.160	acyl-[acyl-carrier-protein]desaturase putative / stearoyl-ACP desaturase putative	-3.2307	3.89996	0.928111	-1.45654	0.449987	4.4016	0
														At2g34870	14717856	14718532	sense	F19I3.10	hydroxyproline-rich glycoproteinfamily protein	-5.68662	3.90731	-1.88002	3.17547	-1.01576	1.55485	0
														At1g48480	17922059	17924653	sense	T1N15.9	leucine-rich repeat transmembraneprotein kinase putative	-6.44209	3.93717	0.584801	0.959574	-1.3369	3.97948	0
														At4g35350	16810487	16812009	sense	F23E12.90	cysteine endopeptidasepapain-type (XCP1)	2.17597	3.95409	-3.72457	-2.43276	6.24698	0.201118	0
														At4g16980	9556997	9557831	sense	FCAALL.162	arabinogalactan-proteinfamily	2.14159	3.97951	-5.94002	-0.866945	6.00973	-1.05935	0
														At3g43680	15587444	15589257	sense	F23N14.60	hypothetical protein	0.773863	4.01533	-3.65101	-1.11032	4.3015	0.286317	0
														At4g36250	17150941	17153581	sense	F23E13.140	aldehyde dehydrogenase familyprotein	-1.43971	4.03348	-4.66927	1.81787	1.97279	-0.310741	0
														At1g65450	24321527	24322727	sense	T8F5.23	transferase family protein	-1.64528	4.13453	-4.32894	1.72384	1.88115	-0.0662624	0
														At1g23205	8233986	8234882	Complement	T26J12.3	invertase/pectin methylesteraseinhibitor family protein	0.795176	4.15561	-3.73426	-1.18097	4.43163	0.328414	0
														At4g24130	12527785	12528602	sense	T19F6.120	expressed protein	1.07175	4.19332	-1.26766	-3.98594	4.79015	2.30104	0
														At5g23970	8096293	8097657	sense	MZF18.15	transferase family protein	-4.78814	4.20046	-2.16111	2.56439	-0.335327	1.53294	0
														At5g06870	2133919	2135162	sense	MOJ9.4	polygalacturonase inhibitingprotein 2 (PGIP2)	-1.04871	4.23848	-4.53553	1.18722	2.48683	-0.118079	0
														At3g54300	20119187	20121624	Complement	F24B22.260	synaptobrevin family protein	-1.98174	4.26528	2.80618	-5.54928	1.55639	8.85403	0
														At1g20190	6998480	6999742	Complement	T20H2.4	expansin putative (EXP11)	1.63473	4.28401	-1.12581	-5.03599	5.61766	2.49071	0
														At3g11160	3496073	3497169	Complement	F9F8.28	expressed protein	-5.37791	4.29424	1.1073	-0.55177	-0.460338	5.17967	0
														At1g75880	28494111	28496116	sense	T4O12.12	family II extracellular lipase 1(EXL1)	2.54644	4.31057	0.0172603	-9.55751	7.08886	3.65465	0
														At1g02470	511765	513611	Complement	T6A9.26	expressed protein	-1.94209	4.34055	1.16295	-3.33782	1.71238	5.13703	0
														At1g66540	24828122	24830249	sense	F28G11.4	cytochrome P450 putative	2.02704	4.35063	-3.05219	-3.2358	6.43081	0.916832	0
														At5g22500	7470446	7474084	sense	MQJ16.4	acyl CoA reductase putative /male-sterility protein putative	-0.570409	4.35247	-7.13556	2.035	3.03254	-1.23008	0
														At1g12090	4089845	4090723	Complement	F12F1.3	protease inhibitor/seedstorage/lipid transfer protein (LTP) family protein	0.90924	4.38986	-3.71728	-1.45462	4.8329	0.458123	0
														At5g15230	4944906	4946219	sense	F8M21.120	gibberellin-regulated protein 4(GASA4) / gibberellin-responsive protein 4	-4.88513	4.47639	0.522822	-0.318566	-0.169438	4.3996	0
														At2g38110	15959685	15962572	Complement	F16M14.4	phospholipid/glycerolacyltransferase family protein	1.0315	4.48892	0.615098	-7.36937	5.00775	4.48895	0
														At1g04680	1303528	1307881	Complement	T1G11.7	pectate lyase family protein	-5.02018	4.49869	-2.2212	2.53073	-0.259834	1.63012	0
														At5g16190	5283576	5286479	Complement	T21H19.110	glycosyl transferase family 2protein	-0.0205704	4.5108	-4.64016	0.0354397	3.75475	-0.0128789	0
														At1g61680	22776120	22778352	Complement	T13M11.3	terpene synthase/cyclase familyprotein	1.66472	4.58366	0.0321623	-8.16191	6.1485	3.86753	0
														At5g64330	25744563	25748328	sense	MSJ1.17	non-phototropic hypocotyl 3(NPH3)	0.96667	4.62719	-2.14819	-3.13313	5.16167	1.72621	0
														At1g10850	3611749	3614633	sense	T16B5.1	pseudogene leucine-rich repeattransmembrane protein kinase putativelikely BAC sequence errors result in a frameshiftpreventing the accurate annotation of this gene.	-4.95613	4.6702	-1.18046	1.31195	-0.123784	2.66054	0
														At5g37740	15009295	15010901	sense	K12B20.22	C2 domain-containing protein	0.91373	4.69356	-2.6105	-2.61389	5.18009	1.37688	0
														At1g35310	12956137	12957048	Complement	T9I1.8	Bet v I allergen family protein	2.21693	4.78691	-2.66844	-4.2709	7.04366	1.5018	0
														At1g19650	6796202	6799694	Complement	F14P1.2	SEC14 cytosolic factor putative/ phosphoglyceride transfer protein putative	-2.46866	4.84227	1.19102	-3.20301	1.60048	5.65835	0
														At5g20240	6829123	6831456	sense	F5O24.130	floral homeotic proteinPISTILLATA (PI)	-2.52255	4.88618	3.82731	-6.76789	1.64445	10.8148	0
														At1g11545	3878550	3880360	Complement	T23J18.21	xyloglucan:xyloglucosyltransferase putative / xyloglucan endotransglycosylaseputative / endo-xyloglucan transferase putative	-1.9982	5.001	0.889238	-3.47454	2.06411	5.36408	0
														At3g04290	1133331	1136297	Complement	T6K12.9	GDSL-motif lipase/hydrolasefamily protein	-7.10416	5.03631	-1.06907	2.18815	-0.932305	3.04463	0
														At2g20870	8989071	8989793	Complement	F5H14.16	cell wall protein precursorputative	-2.54003	5.0401	1.74277	-4.02214	1.74711	6.55863	0
														At1g20850	7252173	7253716	sense	F9H16.17	cysteine endopeptidasepapain-type (XCP2)	2.38026	5.17862	-4.54076	-2.90459	8.81485	0.391097	0
														At4g37800	17775468	17777391	Complement	T28I19.80	xyloglucan:xyloglucosyltransferase putative / xyloglucan endotransglycosylaseputative / endo-xyloglucan transferase putative	1.53237	5.24071	-3.93792	-2.53	6.71661	0.793904	0
														At2g04570	1594701	1596333	sense	T1O3.2	GDSL-motif lipase/hydrolase familyprotein	-2.63943	5.61712	1.14294	-3.5821	1.9324	6.28403	0
														At4g16590	9345172	9349243	sense	FCAALL.402	glucosyltransferase-related	0.119538	5.62648	0.26811	-6.32707	4.82119	5.00795	0
														At1g07720	2390652	2392450	Complement	F24B9.18	beta-ketoacyl-CoA synthasefamily protein	0.795546	5.75065	-2.95748	-2.96096	5.87088	1.77183	0
														At1g33240	12051451	12054526	Complement	T9L6.10	trihelix DNA-binding proteinputative	0.999912	5.77438	-1.46297	-5.08119	6.22728	3.09127	0
														At5g25610	8914236	8916724	Complement	T14C9.150	dehydration-responsive protein(RD22)	-4.00192	6.00549	1.06288	-2.43362	1.13196	6.53014	0
														At5g33370	12619698	12621993	Complement	F19N2.90	GDSL-motif lipase/hydrolasefamily protein	-3.39422	6.34518	2.34332	-4.8602	1.7992	9.46195	0
														At5g15310	4974747	4976230	sense	F8M21.200	myb family transcriptionfactor	1.03145	6.36504	-3.88231	-2.78364	6.81395	1.42877	0
														At2g16760	7282783	7284314	sense	T24I21.17	expressed protein	-4.68825	6.52038	1.43321	-2.54363	0.898849	7.91262	0
														At1g32780	11869809	11872774	Complement	F6N18.16	alcohol dehydrogenase putative	-2.67478	6.57389	1.42015	-4.57129	2.35828	7.84913	0
														At5g22430	7433794	7434938	sense	MWD9.23	expressed protein	-2.31791	6.89042	1.24519	-5.09443	2.8998	7.69121	0
														At1g15360	5283536	5284668	sense	F9L1.31	AP2 domain-containingtranscription factor family protein	-3.43019	7.77679	1.4673	-4.60374	2.38162	9.09047	0

## Sheet: STA
Genes down-regulated in STAmens (all: 645, highest absolute D stat: 407)														Genes up-regulated in STAmens (all: 1311, highest absolute D stat: 1251)
gene	bpstart	bpend	strand	synonym	annotation	SEP	PET	STA	CAR	SEP+PET	PET+STA	d stat test		gene	bpstart	bpend	strand	synonym	annotation	SEP	PET	STA	CAR	SEP+PET	PET+STA	d stat test
At4g23680	12336196	12337486	Complement	F9D16.150	major latex protein-related /MLP-related	3.95449	2.60397	-9.29609	0.10479	6.70506	-3.44079	9.29609		At3g15370	5190579	5191989	sense	MJK13.3	expansin putative (EXP12)	-2.708	-2.33299	21.2003	-3.61597	-4.69321	6.15143	21.2003
At4g08950	5740294	5741521	sense	T3H13.3	phosphate-responsive proteinputative (EXO)	0.829083	1.76541	-8.94528	3.80163	2.29211	-4.12417	8.94528		At1g66850	24940621	24941097	sense	F4N21.4	protease inhibitor/seedstorage/lipid transfer protein (LTP) family protein	-2.13658	-2.58107	20.2834	-4.07684	-4.34383	5.91912	20.2834
At5g64040	25645814	25646730	Complement	MBM17.17	photosystem I reaction centersubunit PSI-N chloroplast putative / PSI-N putative(PSAN)	5.52987	1.244	-8.90365	0.133041	6.35036	-4.69691	8.90365		At5g07560	2390211	2391070	Complement	T2I1.270	glycine-rich protein (GRP20)	-2.12021	-2.72052	19.3811	-3.47604	-4.50373	5.30146	19.3811
At4g21960	11646186	11648373	Complement	T8O5.170	peroxidase 42 (PER42) (P42)(PRXR1)	4.30128	-0.35211	-8.88634	2.72137	3.22444	-7.34204	8.88634		At5g07550	2388325	2389238	Complement	T2I1.260	glycine-rich protein (GRP19)	-1.21623	-2.24825	17.488	-4.83848	-3.1047	5.56511	17.488
At4g01310	543970	545535	Complement	F2N1.5	ribosomal protein L5 familyprotein	1.80823	1.68342	-8.86671	1.99627	3.21596	-3.53663	8.86671		At1g18280	6294333	6295356	sense	T10O22.25	protease inhibitor/seedstorage/lipid transfer protein (LTP) family protein	-2.39956	-2.65687	16.9353	-3.20572	-4.72096	5.30786	16.9353
At1g29070	10149777	10151344	sense	F28N24.22	ribosomal protein L34 familyprotein	3.89712	0.847229	-8.18155	1.21091	4.25292	-4.71496	8.18155		At2g19000	8248186	8248866	sense	F19F24.5	expressed protein	-2.79404	-1.22425	16.4121	-4.43295	-3.59975	7.31898	16.4121
At5g57560	23324356	23325507	Complement	MUA2.13	xyloglucan:xyloglucosyltransferase / xyloglucan endotransglycosylase /endo-xyloglucan transferase (TCH4)	3.3362	0.0702458	-8.05854	2.75931	2.8986	-6.06931	8.05854		At1g71770	26994170	26997109	Complement	F14O23.15	polyadenylate-binding protein 5(PABP5)	-3.00764	-2.77386	16.2852	-1.74323	-5.70538	4.41856	16.2852
At3g22090	7782965	7783564	sense	MZN24.30	expressed protein	-0.661736	2.65163	-7.96738	4.28235	1.66177	-2.88924	7.96738		At4g08670	5536696	5538207	Complement	T3F12.2	protease inhibitor/seedstorage/lipid transfer protein (LTP) family protein	-2.34065	-1.7607	16.1301	-4.25211	-3.71759	6.42096	16.1301
At5g20630	6975106	6975995	Complement	T1M15.30	germin-like protein (GER3)	1.37748	0.482394	-7.82098	4.35334	1.61968	-5.32567	7.82098		At1g12070	4078911	4080104	Complement	F12F1.5	Rho GDP-dissociation inhibitorfamily protein	-2.92778	-1.91336	16.0629	-2.92087	-4.4951	5.67268	16.0629
At5g35630	13847846	13850681	sense	MJE4.9	glutamine synthetase (GS2)	5.05568	0.785999	-7.78831	0.444409	5.21318	-4.73065	7.78831		At1g75930	28511770	28513502	sense	T4O12.260	family II extracellular lipase6 (EXL6)	-2.16283	-2.55065	16.0597	-3.29529	-4.37446	5.16131	16.0597
At5g24490	8365624	8367429	sense	T31K7.7	30S ribosomal protein putative	2.24695	2.49017	-7.74889	1.10275	4.44435	-2.98154	7.74889		At2g21490	9213097	9214205	Complement	F3K23.25	dehydrin family protein	-2.06719	-2.80142	15.883	-3.05556	-4.53909	4.79511	15.883
At3g54850	20332409	20334998	sense	F28P10.170	armadillo/beta-catenin repeatfamily protein / U-box domain-containing family protein	4.09104	1.80674	-7.74687	-0.0522673	5.89098	-3.3495	7.74687		At2g46860	19260757	19262344	sense	F19D11.23	inorganic pyrophosphataseputative [soluble] / pyrophosphate phospho-hydrolaseputative / PPase putative	-2.38618	-0.893309	15.7866	-4.73211	-2.90709	7.30749	15.7866
At3g08910	2710160	2711898	Complement	T16O11.15	DNAJ heat shock proteinputative	4.47645	0.977904	-7.74114	0.627049	4.94451	-4.47826	7.74114		At2g23800	10138569	10139859	Complement	F27L4.2	geranylgeranyl pyrophosphatesynthase (GGPS2) (GGPS5) / GGPP synthetase /farnesyltranstransferase	-2.28139	-2.60383	15.5604	-2.93123	-4.571	4.91506	15.5604
At1g08380	2640858	2641825	Complement	T27G7.25	expressed protein	4.45031	1.00127	-7.7336	0.668555	4.94028	-4.50489	7.7336		At3g22690	8020764	8024541	Complement	MWI23.6	pentatricopeptide (PPR)repeat-containing protein	-1.72469	-2.17831	15.4708	-3.57609	-3.56648	4.99861	15.4708
At1g13930	4761039	4761722	sense	F7A19.2	expressed protein	2.23262	2.72505	-7.68333	0.741166	4.74617	-2.61898	7.68333		At5g07530	2382469	2384511	Complement	T2I1.240	glycine-rich protein (GRP17)	-1.40007	-2.03971	15.3383	-3.36497	-3.14565	4.49484	15.3383
At3g25900	9482076	9484163	sense	MPE11.15	homocysteine S-methyltransferase1 (HMT-1)	2.32173	1.99196	-7.61142	0.957389	4.11696	-2.9417	7.61142		At4g16160	9157530	9158948	sense	FCAALL.207	mitochondrial import innermembrane translocase subunit Tim17/Tim22/Tim23 familyprotein	-2.33689	-1.69762	15.315	-3.00651	-3.72412	5.22243	15.315
At1g72610	27342776	27343706	Complement	F28P22.20	germin-like protein (GER1)	5.58134	1.80432	-7.61138	-0.811022	7.32599	-3.65115	7.61138		At2g17950	7815959	7817877	Complement	T13L16.18	homeodomain transcriptionfactor (WUSCHEL)	-2.46493	-2.14707	15.2747	-3.23615	-4.26114	5.45454	15.2747
At1g74470	27994826	27996667	sense	F1M20.15	geranylgeranyl reductase	2.00165	3.05011	-7.60096	0.606374	4.85154	-2.28333	7.60096		At5g07540	2386014	2387248	Complement	T2I1.250	glycine-rich protein (GRP16)	-2.06517	-2.32216	15.1171	-2.91218	-4.09345	4.72801	15.1171
At4g05180	2671820	2673241	Complement	C17L7.100	oxygen-evolving enhancerprotein 3 chloroplast putative (PSBQ2)	4.50871	0.359112	-7.48334	1.08529	4.17301	-5.14333	7.48334		At1g47980	17695503	17697530	Complement	T2J15.11	expressed protein	-2.42476	-1.89411	15.1047	-3.52625	-3.96051	5.76615	15.1047
At1g15820	5446123	5447776	Complement	F7H2.16	chlorophyll A-B binding proteinchloroplast (LHCB6)	4.01915	1.61352	-7.33532	0.19471	5.36363	-3.58404	7.33532		At4g29340	14447653	14448704	sense	F17A13.160	profilin 3 (PRO3) (PFN3)	-2.54965	-1.15519	15.0892	-4.1178	-3.32274	6.75093	15.0892
At5g54270	22055555	22056794	sense	MDK4.9	chlorophyll A-B binding protein /LHCII type III (LHCB3)	4.28865	1.45358	-7.30396	0.134858	5.42709	-3.73256	7.30396		At1g26480	9156319	9157937	Complement	T1K7.15	14-3-3 protein GF14 iota (GRF12)	-2.36852	-1.4679	15.0536	-3.42521	-3.49926	5.74951	15.0536
At5g48485	19663458	19664028	Complement	MJE7.10	protease inhibitor/seedstorage/lipid transfer protein (LTP) family protein	0.671851	2.16222	-7.28549	2.80741	2.50044	-3.06263	7.28549		At1g32450	11715130	11719935	Complement	F5D14.23	proton-dependent oligopeptidetransport (POT) family protein	-1.15237	-2.46157	14.9203	-4.05428	-3.248	4.74614	14.9203
At1g32060	11532530	11534619	sense	T12O21.4	phosphoribulokinase (PRK) /phosphopentokinase	7.18609	0.691095	-7.27609	-0.694549	6.84848	-4.71097	7.27609		At3g11400	3578394	3580535	sense	F24K9.7	eukaryotic translation initiationfactor 3G / eIF3g	-3.25019	-1.62527	14.7463	-2.97966	-4.48357	6.11871	14.7463
At3g26614	9786127	9788808	Complement	MFE16.16	non-LTR retrotransposon family(LINE)has a 3.0e-39 P-value blast match to GB:NP_038607 L1repeat Tf subfamily member 9 (LINE-element) [Musmusculus]	3.92444	0.891568	-7.27458	0.952691	4.31376	-4.38267	7.27458		At2g16750	7278094	7281775	sense	T24I21.16	protein kinase family protein	-2.40211	-1.3799	14.6954	-4.12566	-3.40444	6.45599	14.6954
At1g76100	28558881	28559651	Complement	T23E18.3	plastocyanin	2.65189	2.02717	-7.20116	0.753782	4.42791	-3.008	7.20116		At3g43810	15675358	15677445	Complement	T28A8.100	calmodulin-7 (CAM7)	-2.37493	-1.41195	14.6486	-3.90521	-3.41706	6.19152	14.6486
At5g22500	7470446	7474084	sense	MQJ16.4	acyl CoA reductase putative /male-sterility protein putative	-0.570409	4.35247	-7.13556	2.035	3.03254	-1.23008	7.13556		At2g36020	15130233	15132667	Complement	F11F19.7	abscisic acid-responsive HVA22family protein	-2.34511	-1.72304	14.5965	-3.55948	-3.70996	5.73294	14.5965
At1g49750	18414597	18416469	Complement	F14J22.4	leucine-rich repeat familyprotein	4.99343	-0.569178	-7.08892	1.6548	3.47208	-6.47766	7.08892		At5g61605	24785608	24786192	Complement	K11J9.26	expressed protein	-2.28325	-2.3726	14.5891	-2.87304	-4.34998	4.89101	14.5891
At5g47500	19288186	19290101	Complement	MNJ7.9	pectinesterase family protein	-1.81522	2.99653	-7.07566	4.97437	0.929133	-2.24606	7.07566		At5g15110	4895969	4897685	sense	F2G14.230	pectate lyase family protein	-2.47572	-1.35154	14.5784	-3.92886	-3.44893	6.3501	14.5784
At4g10340	6408012	6409673	sense	F24G24.140	chlorophyll A-B bindingprotein CP26 chloroplast / light-harvesting complex IIprotein 5 / LHCIIc (LHCB5)	3.50767	1.33604	-7.06853	0.60411	4.51056	-3.61313	7.06853		At3g05610	1625678	1628179	Complement	F18C1.12	pectinesterase family protein	-2.39584	-1.31537	14.524	-4.29588	-3.32578	6.60222	14.524
At1g65960	24555725	24561271	sense	F12P19.12	glutamate decarboxylase 2 (GAD2)	1.7838	1.46365	-6.96591	2.05978	2.92584	-3.51467	6.96591		At3g19360	6707270	6709034	sense	MLD14.9	zinc finger (CCCH-type) familyprotein	-2.55471	-1.09815	14.4753	-4.5577	-3.25126	7.12281	14.4753
At5g47550	19303676	19304221	Complement	MNJ7.14	cysteine protease inhibitorputative / cystatin putative	1.32861	1.81326	-6.79622	2.24341	2.81252	-3.21012	6.79622		At5g09550	2964554	2966728	sense	F17I14.260	Rab GDP dissociationinhibitor putative	-2.29386	-1.17812	14.4391	-4.23185	-3.10879	6.51932	14.4391
At5g13630	4387337	4392230	Complement	MSH12.9	magnesium-chelatase subunit chlHchloroplast putative / Mg-protoporphyrin IX chelataseputative (CHLH)	4.25002	0.990213	-6.75587	0.331702	4.7726	-3.92689	6.75587		At5g42170	16867114	16868935	sense	MJC20.28	family II extracellular lipaseputative	-2.42113	-1.03806	14.4388	-4.57889	-3.07593	7.03623	14.4388
At4g28400	14048360	14050341	sense	F20O9.80	protein phosphatase 2C putative/ PP2C putative	4.28995	0.356567	-6.75227	1.03569	3.99084	-4.82061	6.75227		At2g31980	13616174	13616979	Complement	F22D22.27	cysteine proteinaseinhibitor-related	-1.67964	-1.95503	14.4222	-4.5679	-3.26573	5.86109	14.4222
At4g21620	11491495	11492179	sense	F17L22.80	glycine-rich protein	1.71428	0.69494	-6.6554	3.01142	2.11249	-4.37988	6.6554		At4g30140	14738393	14740682	Complement	F6G3.170	GDSL-motif lipase/hydrolasefamily protein	-2.43974	-1.53575	14.3826	-3.37495	-3.6257	5.71598	14.3826
At3g56900	21077129	21080879	sense	T8M16.230	aladin-related /adracalin-related	3.61471	0.555436	-6.60543	1.253	3.64808	-4.4596	6.60543		At5g51030	20765088	20766578	Complement	K3K7.21	short-chaindehydrogenase/reductase (SDR) family protein	-1.83818	-2.13423	14.3559	-3.83232	-3.60724	5.33226	14.3559
At1g07320	2249132	2250526	sense	F22G5.34	50S ribosomal protein L4chloroplast (CL4)	2.39482	1.48893	-6.5753	1.35762	3.53109	-3.38445	6.5753		At1g50310	18639652	18641778	sense	F14I3.9	monosaccharide transporter(STP9)	-2.11982	-2.27255	14.3224	-2.98231	-4.07612	4.83401	14.3224
At4g25080	12876958	12878639	sense	F24A6.6	magnesium-protoporphyrinO-methyltransferase putative / magnesium-protoporphyrinIX methyltransferase putative	2.78753	1.43249	-6.57263	1.03796	3.85971	-3.42299	6.57263		At5g46940	19075395	19076041	Complement	MQD22.8	invertase/pectin methylesteraseinhibitor family protein	-2.63818	-1.2148	14.2641	-3.90183	-3.46013	6.54652	14.2641
At1g51460	19080650	19085101	Complement	F5D21.8	ABC transporter family protein	-0.90617	3.035	-6.54683	3.29509	1.73976	-1.91856	6.54683		At4g11030	6738116	6742225	sense	T22B4.10	long-chain-fatty-acid--CoAligase putative / long-chain acyl-CoA synthetaseputative	-2.44541	-1.91736	14.2639	-2.88066	-4.03491	5.10859	14.2639
At5g01530	208936	210444	sense	F7A7.50	chlorophyll A-B binding proteinCP29 (LHCB4)	4.728	1.31824	-6.50517	-0.352266	5.6566	-3.52903	6.50517		At3g25010	9110110	9112755	Complement	K3G3.4	disease resistance family protein	-2.49384	-2.2749	14.2532	-2.73895	-4.45764	4.9656	14.2532
At5g14320	4617653	4618900	Complement	F18O22.110	30S ribosomal protein S13chloroplast (CS13)	3.01639	0.799	-6.45354	1.37972	3.38938	-4.03237	6.45354		At3g21890	7709187	7709740	Complement	MZN24.1	zinc finger (B-box type) familyprotein	-2.53322	-1.34903	14.2529	-4.14944	-3.4865	6.59902	14.2529
At2g35370	14898181	14899297	sense	T32F12.25	glycine cleavage system Hprotein 1 mitochondrial (GDCSH) (GCDH)	5.72512	0.227498	-6.41196	0.00636031	4.87679	-4.51219	6.41196		At2g19770	8526720	8528274	Complement	F6F22.20	profilin 4 (PRO4) (PFN4)	-2.32498	-0.824597	14.1072	-4.42045	-2.78996	6.92204	14.1072
At3g47440	17493010	17494364	sense	T21L8.190	major intrinsic family protein/ MIP family protein	3.48481	0.97312	-6.39954	0.598236	4.07841	-3.60566	6.39954		At3g20190	7044950	7047396	sense	MAL21.23	leucine-rich repeattransmembrane protein kinase putative	-2.2478	-1.42075	14.0949	-4.02876	-3.30302	6.14639	14.0949
At5g46110	18714462	18717883	sense	MCL19.16	phosphate/triose-phosphatetranslocator putative	3.58877	0.984906	-6.39743	0.353139	4.25814	-3.40514	6.39743		At1g29140	10179015	10180005	sense	F28N24.16	pollen Ole e 1 allergen andextensin family protein	-2.18897	-0.482942	14.0205	-5.97887	-2.32707	8.25479	14.0205
At1g12900	4392448	4394350	Complement	F13K23.15	glyceraldehyde 3-phosphatedehydrogenase chloroplast putative / NADP-dependentglyceraldehydephosphate dehydrogenase putative	4.2931	0.981533	-6.3943	0.193592	4.77439	-3.80135	6.3943		At3g09900	3034567	3036596	sense	F8A24.5	Ras-related GTP-binding proteinputative	-2.81595	-1.84044	13.9896	-2.69742	-4.32439	5.31961	13.9896
At1g48350	17870876	17872010	sense	F11A17.10	ribosomal protein L18 familyprotein	2.96449	0.563332	-6.39127	1.58322	3.09331	-4.2357	6.39127		At3g18300	6283402	6284226	sense	MYF24.2	expressed protein	-2.40113	-1.93679	13.9285	-3.24464	-3.97959	5.40426	13.9285
At1g09750	3157503	3159147	sense	F21M12.13	chloroplast nucleoidDNA-binding protein-related	1.99968	1.4234	-6.38617	1.74126	3.07752	-3.3866	6.38617		At4g34510	16491801	16493423	sense	T4L20.90	fatty acid elongase putative	-2.6435	-2.00298	13.8853	-2.92372	-4.30807	5.34504	13.8853
At1g30380	10722244	10723229	sense	T4K22.2	photosystem I reaction centersubunit psaK chloroplast putative / photosystem Isubunit X putative / PSI-K putative (PSAK)	3.65331	0.910172	-6.37653	0.61048	4.12996	-3.75783	6.37653		At4g18395	10169455	10169941	sense	F28J12.4	expressed protein	-2.78825	-1.63851	13.8094	-3.40287	-4.03539	6.03969	13.8094
At4g03280	1440177	1441861	sense	F4C21.21	cytochrome B6-F complexiron-sulfur subunit chloroplast / Rieske iron-sulfurprotein / plastoquinol-plastocyanin reductase (petC)	6.28291	0.312622	-6.37557	-0.309893	5.51019	-4.65929	6.37557		At4g00350	151919	154130	sense	F5I10.20	MATE efflux family protein	-2.18389	-1.6549	13.7294	-3.22444	-3.50704	5.23183	13.7294
At1g31330	11214805	11215992	Complement	T19E23.12	photosystem I reaction centersubunit III family protein	3.76904	0.821892	-6.36563	0.691265	4.10056	-3.94036	6.36563		At2g45800	18864795	18866192	Complement	F4I18.22	LIM domain-containing protein	-2.25775	-1.24753	13.7261	-4.20179	-3.13763	6.36488	13.7261
At5g66570	26585884	26587504	sense	K1F13.25	oxygen-evolving enhancer protein1-1 chloroplast / 33 kDa subunit of oxygen evolvingsystem of photosystem II (PSBO1) (PSBO)	4.51426	0.841885	-6.34904	0.210701	4.77726	-4.00611	6.34904		At3g62610	23165734	23167561	sense	F26K9.40	myb family transcription factor	-2.4148	-1.6145	13.7207	-3.55089	-3.66304	5.80538	13.7207
At3g61390	22727328	22729348	sense	T20K12.290	U-box domain-containingprotein	4.77386	0.357954	-6.34468	0.491332	4.38956	-4.55737	6.34468		At3g19070	6593779	6594983	sense	K13E13.20	cell wall protein-related	-2.31066	-1.37477	13.6871	-3.64611	-3.33098	5.86759	13.6871
At3g56850	21057320	21059495	Complement	T8M16.180	ABA-responsive element-bindingprotein 3 (AREB3)	1.15309	0.843385	-6.33285	3.11228	1.75244	-3.87259	6.33285		At5g44300	17862398	17863421	Complement	K9L2.6	dormancy/auxin associated familyprotein	-1.93233	-0.812345	13.6812	-5.51988	-2.41393	7.34258	13.6812
At3g13720	4495026	4495963	Complement	MMM17.14	prenylated rab acceptor (PRA1)family protein	3.64252	0.985902	-6.32166	0.662041	4.16523	-3.78655	6.32166		At3g60750	22464694	22468127	sense	T4C21.160	transketolase putative	-2.88992	-2.18246	13.661	-2.3997	-4.76688	5.00565	13.661
At3g55770	20714284	20716298	sense	F1I16.180	LIM domain-containing protein	6.20751	-0.126467	-6.31185	0.142257	4.83466	-5.20727	6.31185		At5g07420	2349456	2351509	sense	T2I1.130	pectinesterase family protein	-2.56135	-0.805756	13.6433	-4.64578	-2.97071	7.33083	13.6433
At4g12800	7521319	7522667	sense	T20K18.150	photosystem I reaction centersubunit XI chloroplast (PSI-L) / PSI subunit V	4.16637	0.704927	-6.30412	0.582995	4.29615	-4.14938	6.30412		At5g58050	23511511	23514807	Complement	K21L19.4	glycerophosphoryl diesterphosphodiesterase family protein	-2.79302	-1.80912	13.5931	-2.97488	-4.23673	5.56294	13.5931
At5g51550	20956720	20958121	Complement	K17N15.10	phosphate-responsive 1 familyprotein	-0.29239	1.8644	-6.28868	3.76663	1.35041	-2.87867	6.28868		At4g01470	625092	625850	Complement	F11O4.1	major intrinsic family protein /MIP family protein	-2.46213	-1.31029	13.5134	-3.91031	-3.39159	6.29021	13.5134
At4g22570	11882161	11885414	Complement	F7K2.150	adeninephosphoribosyltransferase putative	3.51239	-0.753206	-6.28071	2.50415	2.19712	-6.198	6.28071		At4g17690	9846140	9847120	sense	FCAALL.96	peroxidase putative	-2.70309	-1.8715	13.4812	-3.06054	-4.20842	5.54178	13.4812
At2g33450	14180655	14181609	sense	F4P9.22	50S ribosomal protein L28chloroplast (CL28)	3.52887	0.892915	-6.21369	0.750581	3.96252	-3.79307	6.21369		At1g68610	25767286	25767768	sense	F24J5.15	hypothetical protein	-2.33241	-1.82079	13.4355	-3.43694	-3.78629	5.53039	13.4355
At2g43030	17901913	17902943	sense	MFL8.11	ribosomal protein L3 familyprotein	2.56736	1.18191	-6.13399	1.21283	3.38742	-3.4129	6.13399		At2g23900	10181613	10183706	sense	T29E15.10	glycoside hydrolase family 28protein / polygalacturonase (pectinase) family protein	-2.34284	-1.60553	13.4286	-3.67996	-3.57443	5.82428	13.4286
At5g02160	426352	427252	sense	T7H20.210	expressed protein	3.60095	0.956098	-6.11883	0.571742	4.11212	-3.65767	6.11883		At4g20050	10849792	10853356	Complement	F18F4.150	expressed protein	-2.34782	-2.55664	13.4095	-2.58273	-4.59923	4.6145	13.4095
At1g54780	20443101	20444826	sense	T22H22.19	thylakoid lumen 18.3 kDaprotein	3.70302	1.93461	-6.10712	-0.569364	5.70636	-2.49839	6.10712		At1g54870	20462701	20464309	sense	F14C21.43	short-chaindehydrogenase/reductase (SDR) family protein	-2.9995	-1.67026	13.3897	-2.7299	-4.31164	5.56562	13.3897
At5g43760	17602990	17605824	sense	MQD19.11	beta-ketoacyl-CoA synthaseputative	-0.0983268	3.63128	-6.09111	1.68966	2.99033	-1.36584	6.09111		At5g20710	7010650	7014177	sense	T1M15.110	beta-galactosidase putative /lactase putative	-2.931	-2.01006	13.3867	-2.57426	-4.6053	5.24926	13.3867
At1g01620	225722	227302	Complement	F22L4.16	plasma membrane intrinsicprotein 1C (PIP1C) / aquaporin PIP1.3 (PIP1.3) /transmembrane protein B (TMPB)	1.28266	1.47641	-6.05868	2.03935	2.46548	-2.99144	6.05868		At1g22760	8055315	8059004	sense	T22J18.7	polyadenylate-binding protein 3(PABP3)	-2.21435	-2.11907	13.3516	-3.20805	-3.9849	5.14501	13.3516
At1g78960	29701363	29706128	sense	YUP8H12R.43	lupeol synthase putative /23-oxidosqualene-triterpenoid cyclase putative	2.40153	3.00426	-6.03786	-0.404523	5.4091	-1.66971	6.03786		At3g21670	7626764	7629158	Complement	MIL23.13	nitrate transporter (NTP3)	-1.95379	-2.01188	13.3466	-3.64825	-3.60267	5.28587	13.3466
At2g06850	2763555	2765717	sense	T9F8.4	xyloglucan:xyloglucosyltransferase / xyloglucan endotransglycosylase /endo-xyloglucan transferase (EXT) (EXGT-A1)	2.11053	-0.513015	-6.0369	3.61811	1.3388	-5.55878	6.0369		At1g75940	28514829	28517945	sense	T4O12.15	glycosyl hydrolase family 1protein / anther-specific protein ATA27	-2.11411	-2.30856	13.3279	-2.86984	-4.10487	4.69815	13.3279
At4g38970	18163490	18165734	Complement	F19H22.70	fructose-bisphosphate aldolaseputative	5.84833	0.0327799	-5.9961	0.0124036	4.80899	-4.78502	5.9961		At5g27980	10015803	10016704	Complement	F15F15.50	seed maturation family protein	-2.29612	-1.59662	13.3263	-3.05603	-3.56983	5.21688	13.3263
At4g21280	11334412	11335783	sense	F7J7.220	oxygen-evolving enhancer protein3 chloroplast putative (PSBQ1) (PSBQ)	4.20283	0.53637	-5.96947	0.522459	4.13198	-4.11369	5.96947		At3g28750	10792828	10794081	Complement	T19N8.4	expressed protein	-2.11392	-0.7435	13.3129	-5.53872	-2.50699	7.56889	13.3129
At2g28950	12438418	12440672	Complement	F8N16.24	expansin putative (EXP6)	-1.32723	2.18203	-5.96533	4.46111	0.708123	-2.33313	5.96533		At3g03430	814480	814739	sense	T21P5.15	polcalcin putative /calcium-binding pollen allergen putative	-2.21104	-1.13797	13.1746	-4.76651	-2.97383	6.82503	13.1746
At1g06680	2047878	2049417	sense	F4H5.23	photosystem II oxygen-evolvingcomplex 23 (OEC23)	3.7022	0.619019	-5.899	0.643534	3.81473	-3.84165	5.899		At3g17609	6023933	6024698	sense	MKP6.27	bZIP transcription factor familyprotein / HY5-like protein (HYH)	-2.64345	-2.25506	13.1515	-2.78841	-4.55453	5.1358	13.1515
At3g45610	16750274	16751430	Complement	F9K21.190	Dof-type zinc fingerdomain-containing protein	3.89754	0.0262162	-5.88925	1.11562	3.28413	-4.61063	5.88925		At4g25590	13059146	13059638	Complement	M7J2.40	actin-depolymerizing factorputative	-2.21859	-1.65449	13.1506	-3.6506	-3.51159	5.65869	13.1506
At5g30510	11636256	11638528	Complement	F19I11.30	30S ribosomal protein S1putative	3.30763	0.900424	-5.86714	0.666313	3.787	-3.51161	5.86714		At1g24620	8723698	8724445	Complement	F21J9.28	polcalcin putative /calcium-binding pollen allergen putative	-2.46232	-2.05974	13.1433	-2.94105	-4.17275	5.1305	13.1433
At3g48700	18049633	18050861	Complement	T8P19.210	expressed protein	2.29639	1.29872	-5.86483	1.12824	3.26119	-3.07319	5.86483		At1g23800	8412041	8414868	Complement	F5O8.35	aldehyde dehydrogenasemitochondrial (ALDH3)	-2.29587	-1.40594	13.1259	-3.3986	-3.36119	5.60589	13.1259
At4g33220	16022443	16026364	sense	F4I10.150	pectinesterase family protein	2.32515	2.19283	-5.83342	0.292123	4.2637	-2.26371	5.83342		At2g07560	3169969	3174009	Complement	F9A16.7	ATPase plasma membrane-typeputative / proton pump putative	-2.10636	-0.548731	13.0916	-5.53494	-2.31872	7.67223	13.0916
At1g10960	3664386	3665039	sense	T19D16.12	ferredoxin chloroplastputative	3.61096	1.40852	-5.80335	0.0337215	4.63328	-3.08487	5.80335		At4g10850	6674994	6676976	sense	F25I24.60	nodulin MtN3 family protein	-2.18229	-2.4261	13.0538	-2.5899	-4.29852	4.4611	13.0538
At3g21000	7363927	7365144	sense	MSA6.5	expressed protein	4.31613	0.444915	-5.77682	0.485236	4.11779	-4.163	5.77682		At1g24400	8651396	8653817	Complement	F21J9.6	lysine and histidine specifictransporter putative	-1.61978	-2.31121	13.0188	-2.74009	-3.63852	4.07435	13.0188
At1g51400	19055730	19056250	Complement	F11M15.26	photosystem II 5 kD protein	3.09519	0.684873	-5.76635	1.19749	3.32501	-3.86704	5.76635		At1g28375	9961041	9961646	sense	F3M18.19	expressed protein	-2.14801	-2.37452	13.0142	-2.63142	-4.20923	4.47149	13.0142
At3g44840	16383484	16384744	Complement	F28D10.30	S-adenosyl-L-methionine:carboxyl methyltransferase familyprotein	2.7399	0.468206	-5.75684	1.50172	2.80112	-3.93788	5.75684		At1g13130	4474718	4477939	sense	F3F19.15	glycosyl hydrolase family 5protein / cellulase family protein	-2.66582	-2.30131	12.9692	-1.97987	-4.72405	4.33641	12.9692
At5g61590	24781664	24782550	Complement	K11J9.4	AP2 domain-containingtranscription factor family protein	2.59437	2.38775	-5.73081	-0.142906	4.77498	-2.07559	5.73081		At3g61200	22668430	22669365	Complement	T20K12.100	thioesterase family protein	-2.38466	-1.45873	12.9684	-3.29858	-3.49242	5.55797	12.9684
At3g51870	19254931	19257913	sense	ATEM1.12	mitochondrial substrate carrierfamily protein	4.4506	-0.147342	-5.70646	0.80368	3.4914	-4.73975	5.70646		At5g04180	1147674	1149280	Complement	F21E1.100	carbonic anhydrase familyprotein	-1.78385	-1.08594	12.902	-3.96279	-2.5658	5.66667	12.902
At1g20620	7143073	7146477	sense	F2D10.40	catalase 3 (SEN2)	3.92794	-0.357588	-5.70112	1.44416	2.90692	-5.05789	5.70112		At4g13230	7675659	7676676	Complement	F17N18.16	late embryogenesis abundantdomain-containing protein / LEA domain-containing protein	-2.16145	-0.875146	12.8946	-4.66322	-2.68487	6.81281	12.8946
At2g39730	16577824	16580626	Complement	T5I7.18	ribulose bisphosphatecarboxylase/oxygenase activase / RuBisCO activase	5.13212	0.519686	-5.69544	-0.233248	4.89791	-3.94095	5.69544		At1g22130	7812376	7814248	Complement	F2E2.20	MADS-box family protein	-2.15406	-1.7889	12.8732	-2.70987	-3.64465	4.6623	12.8732
At2g26500	11277225	11278031	sense	T9J22.17	cytochrome b6f complex subunit(petM) putative	4.5172	0.234854	-5.68632	0.431477	4.02907	-4.26826	5.68632		At3g09490	2915565	2916679	sense	F11F8.6	chloroplast lumen common familyprotein	-2.56908	-1.5499	12.8389	-3.38284	-3.73695	5.77184	12.8389
At4g09010	5777080	5779418	Complement	F23J3.40	L-ascorbate peroxidasechloroplast putative	2.84138	1.57045	-5.65845	0.133954	4.24093	-2.54062	5.65845		At5g38760	15541408	15542207	sense	MKD10.60	expressed protein	-1.67121	-0.452023	12.8318	-5.81574	-1.85094	7.43288	12.8318
At1g64510	23958466	23959914	Complement	F1N19.8	ribosomal protein S6 familyprotein	2.92124	0.657805	-5.64504	1.25077	3.14668	-3.77283	5.64504		At3g04620	1255532	1256857	Complement	F7O18.10	expressed protein	-2.55209	-1.64342	12.8291	-2.73515	-3.8763	5.14183	12.8291
At1g03600	898875	899654	sense	F21B7.21	photosystem II family protein	3.96378	0.998443	-5.6156	0.0532738	4.47728	-3.38915	5.6156		At1g52680	19621811	19622680	Complement	F6D8.10	late embryogenesis abundantprotein-related / LEA protein-related	-2.00093	-0.8159	12.8236	-4.28762	-2.4959	6.35945	12.8236
At3g26030	9518550	9520796	sense	MPE11.23	serine/threonine proteinphosphatase 2A (PP2A) regulatory subunit B' putative	3.93855	0.918033	-5.59029	0.0651393	4.39525	-3.36754	5.59029		At5g26640	9347844	9348177	Complement	F21E10.103	hypothetical protein	-2.23749	-0.575971	12.8071	-5.10293	-2.46023	7.4173	12.8071
At3g13090	4203020	4208178	Complement	MJG19.27	ABC transporter putative	2.01495	1.02304	-5.57327	1.58053	2.70705	-3.26157	5.57327		At3g62680	23193698	23194970	sense	F26K9.110	proline-rich family protein	-2.23367	-1.34229	12.796	-4.10463	-3.20182	6.15341	12.796
At3g16220	5497620	5499241	sense	MYA6.3	expressed protein	5.37649	0.101457	-5.56828	-0.0429797	4.47274	-4.27538	5.56828		At2g24450	10399871	10401003	Complement	T28I24.18	fasciclin-like arabinogalactanfamily protein	-2.18107	-1.31763	12.7938	-3.98279	-3.13722	6.00641	12.7938
At1g78630	29580849	29582551	sense	T30F21.4	ribosomal protein L13 familyprotein	1.84254	1.28641	-5.55815	1.42282	2.81538	-2.94391	5.55815		At5g13990	4514570	4516894	Complement	MAC12.17	exocyst subunit EXO70 familyprotein	-2.27121	-1.89152	12.7541	-3.04919	-3.8126	5.0541	12.7541
At1g17220	5885076	5890410	sense	F20D23.8	translation initiation factorIF-2 chloroplast putative	4.34027	0.710044	-5.54314	0.0130138	4.46028	-3.6401	5.54314		At1g23570	8355070	8356353	Complement	F5O8.13	expressed protein	-1.99212	-2.25961	12.7443	-2.88982	-3.92857	4.5854	12.7443
At4g01150	493548	494795	sense	F2N1.18	expressed protein	4.34088	0.699338	-5.53758	-0.000988914	4.45715	-3.61622	5.53758		At5g52360	21275163	21276568	Complement	K24M7.10	actin-depolymerizing factorputative	-2.26086	-1.44393	12.7381	-3.57783	-3.35066	5.69345	12.7381
At1g32470	11739284	11740308	Complement	F5D14.25	glycine cleavage system Hprotein mitochondrial putative	4.65089	-0.285321	-5.5248	0.722433	3.45949	-4.80746	5.5248		At5g64790	25919939	25921785	sense	MXK3.1	glycosyl hydrolase family 17protein	-2.4753	-1.58973	12.7278	-3.49071	-3.68417	5.76407	12.7278
At1g20650	7158234	7162548	Complement	F2D10.13	protein kinase family protein	0.802144	2.94292	-5.49844	0.856101	3.35742	-1.44768	5.49844		At5g40730	16318303	16318748	sense	MNF13.250	arabinogalactan-protein(AGP24)	-1.82576	-1.51197	12.6965	-4.26682	-2.98653	5.79064	12.6965
At1g27770	9671625	9676144	Complement	F28L5.1	calcium-transporting ATPase 1plasma membrane-type / Ca(2+)-ATPase isoform 1 (ACA1) /plastid envelope ATPase 1 (PEA1)	1.74769	0.983146	-5.49795	1.75752	2.42986	-3.19495	5.49795		At4g16480	9291141	9293225	sense	FCAALL.375	sugar transporter familyprotein	-1.89877	-2.67026	12.6706	-2.77566	-4.22143	4.31412	12.6706
At2g24090	10249056	10250693	sense	F27D4.22	ribosomal protein L35 familyprotein	2.96041	0.667844	-5.49442	0.926356	3.21678	-3.50609	5.49442		At5g26060	9104854	9105527	Complement	T1N24.103	S1 self-incompatibilityprotein-related	-2.21377	-1.50275	12.6366	-3.47176	-3.36825	5.51881	12.6366
At4g37470	17616653	17618452	Complement	F6G17.120	hydrolase alpha/beta foldfamily protein	3.5199	1.68664	-5.49032	-0.471976	5.04863	-2.47003	5.49032		At4g36490	17222001	17225019	sense	AP22.26	SEC14 cytosolic factor putative/ phosphoglyceride transfer protein putative	-2.3632	-1.1902	12.6189	-3.95232	-3.17844	6.2156	12.6189
At5g62350	25054652	25055588	sense	MMI9.21	invertase/pectin methylesteraseinhibitor family protein / DC 1.2 homolog (FL5-2I22)	1.26659	0.987263	-5.48967	2.39461	1.98456	-3.29439	5.48967		At5g16500	5386678	5389168	Complement	MQK4.24	protein kinase family protein	-2.24242	-1.7285	12.6128	-3.07901	-3.636	5.11405	12.6128
At1g68590	25761072	25761890	Complement	F24J5.17	plastid-specific 30S ribosomalprotein 3 putative / PSRP-3 putative	3.24848	1.18758	-5.47546	0.188403	4.1029	-2.93691	5.47546		At4g25010	12854640	12856361	Complement	F13M23.150	nodulin MtN3 family protein	-2.74746	-1.53228	12.554	-2.85964	-3.92403	5.46895	12.554
At1g69740	26235499	26238626	sense	T6C23.6	porphobilinogen synthaseputative / delta-aminolevulinic acid dehydrataseputative	1.53866	1.61209	-5.47476	1.17389	2.87098	-2.42389	5.47476		At2g07040	2916535	2918939	sense	T4E14.15	leucine-rich repeattransmembrane protein kinase putative	-2.35258	-1.45231	12.5245	-3.57421	-3.43649	5.75816	12.5245
At1g72970	27456438	27459594	sense	F3N23.17	glucose-methanol-choline (GMC)oxidoreductase family protein	-1.64303	3.12616	-5.46541	3.45811	1.17882	-1.40351	5.46541		At1g19890	6905025	6906009	sense	F6F9.5	histone H3 putative	-2.33269	-1.68971	12.4707	-2.92675	-3.6902	5.06227	12.4707
At2g06520	2587781	2588355	Complement	T12H3.7	membrane protein putative	3.72633	0.547936	-5.4609	0.555485	3.7376	-3.74402	5.4609		At1g23350	8293584	8294232	Complement	F26F24.23	invertase/pectin methylesteraseinhibitor family protein	-2.24749	-1.67367	12.4456	-3.41103	-3.55654	5.41374	12.4456
At5g52970	21496835	21498452	sense	MXC20.24	thylakoid lumen 15.0 kDaprotein	3.39584	0.104561	-5.45587	1.06804	2.95682	-4.13868	5.45587		At1g23730	8395546	8398497	sense	F5O8.28	carbonic anhydrase putative /carbonate dehydratase putative	-1.38752	-2.10959	12.4416	-2.72914	-3.2167	3.84104	12.4416
At5g08050	2578370	2579164	sense	F13G24.250	expressed protein	5.33067	0.569851	-5.42542	-0.55864	5.12463	-3.72574	5.42542		At1g30350	10710176	10711646	Complement	T4K22.5	pectate lyase family protein	-2.31677	-2.36606	12.4224	-2.39176	-4.38368	4.39774	12.4224
At5g45800	18592809	18596324	Complement	MRA19.24	leucine-rich repeattransmembrane protein kinase putative	3.84251	-0.586239	-5.41284	1.60036	2.61754	-5.15971	5.41284		At3g05930	1770343	1771356	sense	F10A16.23	germin-like protein (GLP8)	-2.33194	-1.2405	12.3946	-3.8502	-3.20076	6.05534	12.3946
At1g52230	19458505	19459337	sense	F9I5.11	photosystem I reaction centersubunit VI chloroplast putative / PSI-H putative(PSAH2)	3.35838	0.882183	-5.40002	0.432249	3.81114	-3.29637	5.40002		At2g18470	8012367	8014849	Complement	T30D6.2	protein kinase family protein	-2.16404	-1.56092	12.3908	-3.12505	-3.39957	5.12466	12.3908
At3g23020	8177222	8179750	Complement	MXC7.5	pentatricopeptide (PPR)repeat-containing protein	1.74063	0.0677941	-5.36426	2.74797	1.5548	-4.22619	5.36426		At1g26320	9105195	9107176	sense	F28B23.3	NADP-dependent oxidoreductaseputative	-2.39838	-1.80275	12.3848	-3.18566	-3.83422	5.32863	12.3848
At1g61520	22703675	22705048	sense	T25B24.12	chlorophyll A-B binding protein/ LHCI type III (LHCA3.1)	3.89505	0.291335	-5.35441	0.666434	3.59251	-4.01382	5.35441		At1g61110	22520271	22521952	sense	F11P17.16	no apical meristem (NAM) familyprotein	-2.45879	-1.55457	12.3637	-3.46052	-3.6326	5.71105	12.3637
At1g44575	16874163	16875818	sense	T18F15.3	photosystem II 22kDa proteinchloroplast / CP22 (PSBS)	2.92289	1.83877	-5.35171	-0.19722	4.55208	-2.28298	5.35171		At1g55560	20757989	20760320	Complement	T5A14.2	multi-copper oxidase type Ifamily protein	-2.19326	-0.973836	12.3473	-4.48415	-2.80557	6.57985	12.3473
At3g09970	3063779	3065580	sense	T22K18.22	calcineurin-likephosphoesterase family protein	-0.344404	2.87523	-5.34674	2.15297	2.14079	-1.53331	5.34674		At3g04700	1276674	1277830	sense	F7O18.17	expressed protein	-2.21504	-1.09791	12.3385	-3.63804	-2.96962	5.81537	12.3385
At5g40950	16428037	16429284	sense	MEE6.2	50S ribosomal protein L27chloroplast putative (RPL27)	2.41468	1.18329	-5.3282	0.936701	3.23973	-2.97943	5.3282		At4g35010	16667935	16672093	Complement	F11I11.3	glycosyl hydrolase family 35protein	-2.00221	-0.440844	12.2794	-5.51404	-2.12647	7.50828	12.2794
At1g05190	1502343	1503826	Complement	YUP8H12.20	ribosomal protein L6 familyprotein	2.5331	0.416513	-5.31815	1.62035	2.56691	-3.81665	5.31815		At2g25890	11044458	11045204	sense	F17H15.8	glycine-rich protein / oleosin	-2.42187	-1.43451	12.274	-3.77175	-3.46856	5.99566	12.274
At4g24770	12766040	12768033	Complement	F6I7.11	31 kDa ribonucleoproteinchloroplast putative / RNA-binding protein RNP-Tputative / RNA-binding protein 1/2/3 putative /RNA-binding protein cp31 putative	3.12317	0.201183	-5.30909	1.24875	2.84973	-4.02076	5.30909		At2g22180	9436049	9436924	sense	T26C19.16	hydroxyproline-richglycoprotein family protein	-2.27019	-1.68665	12.2667	-2.83756	-3.63136	4.90104	12.2667
At5g22920	7664994	7667268	sense	MRN17.15	zinc finger (C3HC4-type RINGfinger) family protein	0.68353	2.32907	-5.3068	1.07983	2.70937	-1.55075	5.3068		At1g35490	13061616	13063424	sense	F15O4.49	bZIP family transcriptionfactor	-2.29199	-1.26351	12.2505	-3.92661	-3.18403	6.06867	12.2505
At1g79850	30046136	30046845	Complement	F19K16.19	30S ribosomal protein S17chloroplast / CS17 (RPS17)	3.18683	0.616926	-5.29099	0.859414	3.33744	-3.59358	5.29099		At5g17480	5762691	5762942	sense	K3M16.50	polcalcin putative /calcium-binding pollen allergen putative	-2.34106	-1.05004	12.2377	-4.43385	-3.00765	6.64078	12.2377
At1g52220	19457238	19458366	Complement	F9I5.10	expressed protein	3.64843	0.811023	-5.28755	0.138806	4.02559	-3.20499	5.28755		At1g79860	30046992	30049068	Complement	F19K16.18	expressed protein	-2.30205	-1.81436	12.1894	-2.91899	-3.76823	4.95761	12.1894
At4g34620	16534867	16536176	Complement	T4L20.200	ribosomal protein S16 familyprotein	2.11604	1.18016	-5.28751	1.14853	2.96381	-2.92507	5.28751		At5g20410	6896679	6898785	sense	F5O24.300	12-diacylglycerol3-beta-galactosyltransferase putative /monogalactosyldiacylglycerol synthase putative / MGDGsynthase putative	-2.21203	-1.64664	12.1881	-3.10336	-3.5215	5.1097	12.1881
At4g02770	1229111	1229945	Complement	T5J8.7	photosystem I reaction centersubunit II chloroplast putative / photosystem I 20 kDasubunit putative / PSI-D putative (PSAD1)	3.92601	0.605144	-5.27722	0.241661	3.98115	-3.55948	5.27722		At1g73220	27541937	27544352	sense	T18K17.11	sugar transporter familyprotein	-3.93817	-3.28295	12.174	-0.503	-7.47375	3.86074	12.174
At5g14910	4823717	4825373	sense	F2G14.30	heavy-metal-associateddomain-containing protein	2.70645	0.722926	-5.27484	1.05973	3.03595	-3.39162	5.27484		At3g20150	7031418	7036505	sense	MAL21.18	kinesin motor family protein	-2.25018	-1.6526	12.1583	-3.07826	-3.55739	5.10428	12.1583
At5g61600	24783612	24784656	Complement	K11J9.13	ethylene-responsiveelement-binding family protein	3.48543	-0.139856	-5.24404	1.35264	2.8024	-4.43929	5.24404		At3g13360	4338366	4340403	Complement	MDC11.20	expressed protein	-2.0804	-0.561718	12.1225	-5.25123	-2.30834	7.29519	12.1225
At1g55670	20806336	20807115	Complement	F20N2.33	photosystem I reaction centersubunit V chloroplast putative / PSI-G putative (PSAG)	3.2999	0.891267	-5.23613	0.484252	3.72974	-3.29286	5.23613		At3g62180	23030807	23031454	Complement	T17J13.140	invertase/pectinmethylesterase inhibitor family protein	-1.74728	-0.830915	12.112	-5.21862	-2.26703	6.73156	12.112
At3g08000	2554840	2555847	Complement	F17A17.34	RNA-binding protein putative	0.345804	0.653209	-5.22642	3.66782	0.869223	-3.46432	5.22642		At1g23240	8252704	8254610	Complement	F26F24.33	caleosin-related familyprotein	-1.35175	-2.08485	12.111	-2.55772	-3.17655	3.65752	12.111
At4g24780	12770341	12772343	Complement	F22K18.20	pectate lyase family protein	0.95802	0.93833	-5.2215	2.54355	1.66508	-3.12842	5.2215		At5g39310	15756508	15757742	Complement	K3K3.160	expansin putative (EXP24)	-2.61651	-1.67892	12.1	-3.11934	-3.91525	5.5044	12.1
At2g35260	14856615	14859048	sense	T4C15.7	expressed protein	2.9074	0.158534	-5.20573	1.37748	2.6236	-3.97579	5.20573		At1g71680	26948536	26950258	sense	F26A9.9	lysine and histidine specifictransporter putative	-2.1765	-0.92169	12.0904	-4.32578	-2.74502	6.44602	12.0904
At3g62000	22970176	22972184	Complement	F21F14.170	O-methyltransferase family 3protein	4.21542	0.394947	-5.18991	0.132806	3.97762	-3.64702	5.18991		At3g52770	19568699	19569985	Complement	F3C22.170	expressed protein	-2.13222	-2.24695	12.0884	-2.56362	-4.07216	4.40206	12.0884
At5g54600	22200204	22201793	sense	MRB17.10	50S ribosomal protein L24chloroplast (CL24)	3.15958	0.521154	-5.17199	0.776164	3.2239	-3.50761	5.17199		At4g28280	14010791	14011493	sense	F26K10.160	expressed protein	-2.37529	-1.54387	12.0655	-3.09621	-3.56481	5.27492	12.0655
At1g60950	22448185	22448826	sense	T7P1.9	ferredoxin chloroplast (PETF)	4.08633	0.710451	-5.16151	-0.0578108	4.2453	-3.35318	5.16151		At5g47000	19086171	19087560	Complement	MQD22.14	peroxidase putative	-2.17599	-0.932166	12.0607	-4.72004	-2.74392	6.74284	12.0607
At4g25050	12870077	12871228	sense	F24A6.4	acyl carrier family protein / ACPfamily protein	2.80737	1.23617	-5.15611	0.340363	3.71657	-2.72706	5.15611		At3g25140	9154718	9156851	sense	MJL12.8	glycosyl transferase family 8protein	-2.20133	-1.48095	12.0587	-3.37404	-3.33519	5.39475	12.0587
At5g35790	13973929	13976975	Complement	MWP19.3	glucose-6-phosphate1-dehydrogenase / G6PD (APG1)	1.55522	1.33488	-5.15492	1.35046	2.60109	-2.60822	5.15492		At5g65530	26207823	26210192	Complement	K21L13.3	protein kinase putative	-2.8112	-1.95149	12.0274	-1.78352	-4.52492	4.30957	12.0274
At5g64870	25946764	25948610	Complement	MXK3.10	expressed protein	-1.23819	1.36046	-5.15188	4.86238	0.113158	-2.70328	5.15188		At3g02970	669110	670502	Complement	F13E7.8	phosphate-responsive 1 familyprotein	-2.21504	-1.66145	12.0162	-3.31077	-3.51543	5.27116	12.0162
At3g15160	5104374	5108457	sense	F4B12.7	expressed protein	2.76574	0.518161	-5.12923	1.18399	2.86996	-3.56574	5.12923		At4g02250	983970	984523	sense	T2H3.11	invertase/pectin methylesteraseinhibitor family protein	-1.90953	-0.753918	12.0111	-5.12755	-2.33902	6.87765	12.0111
At4g18480	10201683	10203454	Complement	F28J12.140	magnesium-chelatase subunitchlI chloroplast / Mg-protoporphyrin IX chelatase (CHLI)(CS) (CH42)	2.85171	1.7992	-5.12587	-0.170085	4.36267	-2.25929	5.12587		At4g04930	2509131	2511060	sense	T1J1.1	fatty acid desaturase familyprotein	-2.26925	-1.49338	12.0037	-3.70089	-3.38687	5.73702	12.0037
At1g68530	25716251	25718470	Complement	T26J14.10	very-long-chain fatty acidcondensing enzyme (CUT1)	2.79913	1.84579	-5.11764	-0.0936207	4.30368	-2.29774	5.11764		At4g25780	13121077	13121964	sense	F14M19.60	pathogenesis-related proteinputative	-1.98924	-1.97377	12.002	-3.19751	-3.61561	4.88521	12.002
At5g37540	14930065	14931661	sense	MPA22.8	aspartyl protease family protein	2.1199	2.84248	-5.11154	-0.450082	4.72145	-1.40585	5.11154		At5g62850	25247904	25248503	Complement	MQB2.17	nodulin MtN3 family protein	-1.88617	-0.81245	11.9916	-5.02944	-2.37378	6.73861	11.9916
At1g20340	7042419	7043353	Complement	F14O10.6	plastocyanin	3.62474	0.893234	-5.10081	0.105607	4.04011	-3.16966	5.10081		At1g04470	1211072	1214590	Complement	F19P19.7	expressed protein	-1.95643	-1.42516	11.9916	-3.38595	-3.0588	5.16683	11.9916
At1g35680	13209965	13211630	sense	F15O4.7	50S ribosomal protein L21chloroplast / CL21 (RPL21)	1.83981	1.16388	-5.09394	1.38556	2.67615	-2.88553	5.09394		At4g35180	16738344	16740371	Complement	T12J5.50	amino acid transporter familyprotein	-1.75268	-2.37213	11.9777	-3.15144	-3.76225	4.53323	11.9777
At5g13000	4110298	4121430	Complement	T24H18.170	glycosyl transferase family 48protein	-1.08485	1.69607	-5.09089	4.02895	0.516688	-2.22853	5.09089		At1g52570	19587609	19590220	Complement	F6D8.21	phospholipase D alpha 2 / PLDalpha 2 (PLDALPHA2) (PLD2) / choline phosphatase 2	-2.32873	-1.74714	11.9741	-3.1672	-3.71724	5.25114	11.9741
At3g55280	20511312	20512686	sense	T26I12.160	60S ribosomal protein L23A(RPL23aB)	4.3366	-0.323479	-5.08795	0.720562	3.18619	-4.52951	5.08795		At5g46200	18745277	18747474	Complement	MCL19.17	expressed protein	-2.09062	-1.4025	11.951	-2.57236	-3.2159	4.56055	11.951
At2g39670	16541311	16544396	sense	F17A14.4	radical SAM domain-containingprotein	1.91042	0.601962	-5.08084	1.62326	2.21309	-3.2646	5.08084		At3g08500	2576964	2578078	Complement	T8G24.3	myb family transcription factor(MYB83)	-2.33811	-1.60567	11.9457	-3.11241	-3.59613	5.25424	11.9457
At5g01090	32831	34325	sense	F7J8.70	legume lectin family protein	-0.720062	2.70222	-5.07352	2.47094	1.64892	-1.4483	5.07352		At3g10410	3235296	3238089	Complement	F13M14.32	serine carboxypeptidase IIIputative	-2.72973	-1.46435	11.9432	-3.20751	-3.7988	5.7506	11.9432
At3g59370	21952849	21953509	Complement	F25L23.230	expressed protein	3.35234	0.131628	-5.06906	1.06948	2.97095	-3.98133	5.06906		At2g15535	6785277	6785935	sense	F9O13.31	SLR1 binding pollen coatprotein-related	-2.32301	-1.48731	11.9239	-3.17703	-3.46155	5.32762	11.9239
At5g42100	16846379	16848467	Complement	MJC20.21	glycosyl hydrolase family 17protein	-0.238307	1.65481	-5.06096	3.00977	1.21957	-2.32121	5.06096		At1g10770	3591634	3592412	Complement	F20B24.19	invertase/pectin methylesteraseinhibitor family protein	-1.79196	-0.526727	11.9238	-5.83615	-2.02111	7.39691	11.9238
At3g63380	23417586	23421335	Complement	MAA21.10	calcium-transporting ATPaseplasma membrane-type putative / Ca(2+)-ATPase putative(ACA12)	2.93466	0.787121	-5.04767	0.622962	3.3191	-3.13468	5.04767		At5g07430	2352460	2354203	sense	T2I1.140	pectinesterase family protein	-1.64197	-0.418652	11.9181	-6.27742	-1.79108	7.61063	11.9181
At3g56880	21070894	21071944	sense	T8M16.210	VQ motif-containing protein	2.72838	0.682988	-5.04158	0.970371	3.00872	-3.30677	5.04158		At1g80660	30321119	30324840	Complement	F23A5.1	ATPase 9 plasma membrane-typeputative / proton pump 9 putative / proton-exportingATPase putative	-1.66609	-0.469995	11.9168	-5.19344	-1.86539	6.85396	11.9168
At2g20260	8743818	8744843	sense	F11A3.19	photosystem I reaction centersubunit IV chloroplast putative / PSI-E putative(PSAE2)	3.53757	0.847242	-5.04059	0.189518	3.90552	-3.18689	5.04059		At4g04460	2224549	2227872	sense	T26N6.7	aspartyl protease family protein	0.0795892	-2.71023	11.8974	-5.08852	-2.25159	4.13384	11.8974
At2g26190	11154717	11157588	Complement	T1D16.17	calmodulin-binding familyprotein	2.19087	0.711133	-5.01183	1.31271	2.56593	-3.18247	5.01183		At5g50030	20371815	20372853	sense	MPF21.4	invertase/pectin methylesteraseinhibitor family protein	-1.67838	-0.82962	11.8957	-4.96234	-2.20819	6.43339	11.8957
At2g38540	16137428	16138252	sense	T6A23.26	nonspecific lipid transferprotein 1 (LTP1)	0.376029	2.07565	-5.009	1.73194	2.14872	-1.8327	5.009		At1g09380	3026137	3029551	Complement	F14J9.4	integral membrane family protein/ nodulin MtN21-related	-2.10987	-1.85273	11.8305	-2.89348	-3.63592	4.74913	11.8305
At5g62470	25096217	25098314	Complement	K19B1.8	myb family transcription factor(MYB96)	-0.348445	1.2572	-4.99155	3.60136	0.785058	-2.67998	4.99155		At3g17180	5855867	5859163	Complement	K14A17.30	serine carboxypeptidase S10family protein	-2.31834	-1.40351	11.8281	-3.45971	-3.35649	5.59344	11.8281
At2g20890	8994749	8996494	sense	F5H14.14	expressed protein	2.84965	0.875618	-4.97462	0.605861	3.32745	-3.03479	4.97462		At5g19610	6617748	6622047	Complement	T29J13.30	sec7 domain-containing protein	-2.33312	-1.72818	11.828	-2.79168	-3.72336	4.88535	11.828
At5g66190	26467983	26470388	Complement	K2A18.27	ferredoxin--NADP(+) reductaseputative / adrenodoxin reductase putative	4.83489	0.202023	-4.96775	-0.158524	4.20317	-3.72111	4.96775		At3g52570	19512108	19513977	sense	F22O6.50	expressed protein	-2.23605	-1.41977	11.8226	-3.61152	-3.29149	5.64493	11.8226
At5g28770	10796463	10798211	Complement	T32B20.4	bZIP transcription factor familyprotein	0.770073	1.85496	-4.96108	1.37499	2.34518	-1.89224	4.96108		At3g61130	22632967	22636691	sense	T20K12.30	glycosyl transferase family 8protein	-1.88811	-1.13443	11.8167	-3.92621	-2.69993	5.67315	11.8167
At3g54060	20029893	20031804	Complement	F24B22.20	hypothetical protein	1.26154	0.770553	-4.96085	2.17124	1.78464	-3.09861	4.96085		At2g26410	11241729	11243829	Complement	T9J22.8	calmodulin-binding familyprotein	-2.22766	-1.5118	11.8142	-3.46081	-3.37867	5.47007	11.8142
At1g68560	25737845	25741658	Complement	F24J5.20	alpha-xylosidase (XYL1)	0.986078	3.4278	-4.94115	0.0588059	3.97898	-0.901065	4.94115		At1g03050	707726	709860	sense	F10O3.13	epsin N-terminal homology (ENTH)domain-containing protein / clathrin assemblyprotein-related	-2.22219	-1.47742	11.7904	-3.49971	-3.33856	5.5083	11.7904
At4g01050	455768	458510	sense	F2N1.31	hydroxyproline-rich glycoproteinfamily protein	2.99489	1.18347	-4.93777	0.218733	3.78077	-2.76126	4.93777		At3g17020	5802555	5804130	Complement	K14A17.9	universal stress protein (USP)family protein	-2.04237	-1.28485	11.78	-3.92062	-2.97598	5.7547	11.78
At2g37660	15802392	15804137	Complement	F13M22.16	expressed protein	1.32774	1.64881	-4.92611	1.14238	2.68569	-2.1918	4.92611		At3g26085	9532006	9533850	sense	MPE11.26	CAAX amino terminal proteasefamily protein	-2.0951	-0.996347	11.7658	-4.54855	-2.73411	6.4535	11.7658
At2g23120	9849123	9849714	sense	F21P24.18	expressed protein	2.11954	1.27145	-4.92246	0.79504	3.06459	-2.57406	4.92246		At4g39130	18228112	18228846	Complement	T22F8.30	dehydrin family protein	-2.14891	-1.72855	11.7549	-2.91899	-3.54882	4.83378	11.7549
At1g64720	24050216	24052261	Complement	F13O11.4	expressed protein	3.22267	0.39965	-4.91772	0.741447	3.14577	-3.52256	4.91772		At4g19960	10813817	10817060	sense	F18F4.60	potassium transporter familyprotein	-0.653472	-2.65032	11.715	-3.61189	-2.92139	3.76062	11.715
At5g20720	7014676	7016476	sense	T1M15.120	20 kDa chaperonin chloroplast(CPN21) (CHCPN10) (CPN20)	1.26589	1.44486	-4.89834	1.32478	2.43429	-2.30886	4.89834		At3g62150	23019730	23024554	Complement	T17J13.110	multidrug resistant (MDR) ABCtransporter putative	-1.94808	-1.33938	11.709	-3.58954	-2.95963	5.36361	11.709
At4g26370	13333733	13336239	Complement	M3E9.200	antitermination NusBdomain-containing protein	2.59655	-0.0336387	-4.89321	1.5201	2.16129	-3.91408	4.89321		At1g20130	6978101	6985306	sense	T20H2.9	family II extracellular lipaseputative	-2.3376	-1.17609	11.7052	-3.74539	-3.14195	5.94513	11.7052
At4g29060	14317262	14321573	sense	F25O24.9	elongation factor Ts familyprotein	3.13412	0.277491	-4.88222	0.921827	2.93828	-3.63957	4.88222		At3g42590	14707244	14707936	sense	T12K4.40	hypothetical protein	-2.36907	-0.469357	11.7024	-4.12998	-2.47861	6.73442	11.7024
At3g25040	9124313	9126301	sense	K3G3.1	ER lumen protein retainingreceptor putative / HDEL receptor putative	2.74261	0.815912	-4.87892	0.634687	3.17655	-2.97602	4.87892		At2g18480	8016664	8018325	Complement	T30D6.6	mannitol transporter putative	-1.9871	-1.59431	11.695	-3.21048	-3.24487	4.94771	11.695
At3g53430	19820665	19821447	Complement	F4P12.130	60S ribosomal protein L12(RPL12B)	1.30275	0.457956	-4.85794	2.33193	1.5373	-3.34021	4.85794		At2g16730	7268912	7273249	Complement	T24I21.14	glycosyl hydrolase family 35protein	-2.24763	-1.38715	11.6868	-3.85173	-3.25744	5.86501	11.6868
At2g14880	6400414	6402020	Complement	T26I20.4	SWIB complex BAF60bdomain-containing protein	1.39464	-0.503276	-4.85567	3.58029	0.752898	-4.59216	4.85567		At1g77980	29320106	29321961	Complement	F28K19.20	MADS-box family protein	-2.23576	-1.76649	11.6819	-2.86721	-3.67062	4.86577	11.6819
At1g03630	907650	909375	sense	F21B7.24	protochlorophyllide reductase Cchloroplast / PCR C / NADPH-protochlorophyllideoxidoreductase C (PORC)	3.26409	1.13505	-4.84913	-0.0290745	3.99508	-2.73374	4.84913		At1g14420	4931774	4933400	Complement	F14L17.19	pectate lyase family protein	-2.00562	-1.44051	11.6795	-3.65995	-3.09805	5.42746	11.6795
At3g12050	3839108	3841472	sense	T21B14.13	Aha1 domain-containing protein	1.53318	1.01407	-4.83453	1.51362	2.26538	-2.74387	4.83453		At5g59370	23967049	23969048	sense	F2O15.3	actin 4 (ACT4)	-2.48081	-1.46155	11.6762	-3.31488	-3.56637	5.60379	11.6762
At4g15560	8883905	8887563	sense	FCAALL.24	1-deoxy-D-xylulose 5-phosphatesynthase putative / 1-deoxyxylulose-5-phosphate synthaseputative / DXP-synthase putative (DEF) (CLA1)	1.74974	1.2032	-4.83152	1.24958	2.63055	-2.66772	4.83152		At2g31500	13420841	13423613	sense	T9H9.2	calcium-dependent protein kinaseputative / CDPK putative	-2.25222	-1.28407	11.6568	-3.66999	-3.17163	5.74608	11.6568
At2g28930	12431852	12434189	sense	F8N16.1	protein kinase (APK1b)	-0.63367	2.47517	-4.82716	2.39407	1.53989	-1.45894	4.82716		At1g75910	28505098	28506937	sense	T4O12.250	family II extracellular lipase4 (EXL4)	-2.33202	-2.20642	11.6365	-2.76984	-4.18316	4.77289	11.6365
At3g18650	6417350	6418510	Complement	MVE11.1	MADS-box family protein	2.03946	0.401551	-4.82223	1.74157	2.12327	-3.45679	4.82223		At2g10970	4339921	4340661	Complement	F15K19.4	invertase/pectin methylesteraseinhibitor family protein	-2.28487	-1.80762	11.5699	-2.86078	-3.74269	4.86882	11.5699
At1g60800	22387118	22391122	Complement	F8A5.31	leucine-rich repeat familyprotein / protein kinase family protein	-0.260468	1.57038	-4.81497	2.94347	1.12936	-2.2462	4.81497		At5g15140	4908689	4910673	sense	F8M21.30	aldose 1-epimerase familyprotein	-2.25596	-1.36686	11.5686	-3.68646	-3.24995	5.71998	11.5686
At4g25830	13133645	13135033	sense	F14M19.9	integral membrane familyprotein	4.50415	0.308635	-4.81129	-0.165451	4.096	-3.50634	4.81129		At3g43080	15083343	15086068	Complement	F7M19.90	Mutator-like transposase familyhas a 2.8e-60 P-value blast match to Q9S9L6 /322-461 PfamPF03108 MuDR family transposase (MuDr-element domain)	-2.21591	-1.5794	11.5567	-3.14257	-3.45117	5.14549	11.5567
At4g20360	10989963	10991720	sense	F9F13.10	elongation factor Tu / EF-Tu(TUFA)	2.91706	1.0496	-4.79505	0.307906	3.56599	-2.78419	4.79505		At5g61720	24818780	24820395	sense	K11J9.27	expressed protein	-1.74223	-0.120174	11.5128	-6.31657	-1.60672	7.92824	11.5128
At1g17840	6142603	6146514	sense	F2H15.7	ABC transporter family protein	0.322199	1.75464	-4.78856	1.99161	1.81489	-2.00989	4.78856		At4g25950	13173762	13174344	Complement	F14M19.4	vacuolar ATP synthase putative/ V-ATPase putative / vacuolar proton pump putative	-1.70168	-1.4693	11.4941	-3.10498	-2.88454	4.63262	11.4941
At1g27950	9740691	9742146	sense	F13K9.6	lipid transfer protein-related	-0.113137	3.29233	-4.77118	1.14481	2.70118	-0.887855	4.77118		At3g20550	7174470	7177943	Complement	K10D20.9	forkhead-associateddomain-containing protein / FHA domain-containing protein	-2.41342	-1.43388	11.4491	-3.35681	-3.46901	5.55204	11.4491
At3g61840	22903456	22904244	sense	F15G16.2	expressed protein	3.53835	1.15964	-4.76663	-0.32723	4.29887	-2.64903	4.76663		At1g51915	19297147	19297638	sense	T14L22.16	cryptdin protein-related	-2.15037	-1.76398	11.4332	-2.28359	-3.63418	4.20416	11.4332
At2g43560	18080566	18082514	Complement	T1O24.30	immunophilin / FKBP-typepeptidyl-prolyl cis-trans isomerase family protein	3.57036	0.74008	-4.75473	0.0201806	3.83755	-3.0212	4.75473		At3g01700	258886	259638	sense	F4P13.24	arabinogalactan-protein (AGP11)	-2.13062	-0.522365	11.4121	-5.18532	-2.31334	7.21307	11.4121
At4g29780	14579710	14581706	sense	F27B13.20	expressed protein	0.71731	1.11252	-4.74284	2.24296	1.60753	-2.61592	4.74284		At3g18990	6548875	6551847	Complement	K13E13.10	transcriptional factor B3family protein	-2.43886	-1.58555	11.3936	-3.19892	-3.64696	5.3896	11.3936
At1g71260	26865327	26867080	Complement	F3I17.9	expressed protein	0.351799	-0.327111	-4.73524	4.62069	0.0184992	-4.24474	4.73524		At4g27580	13765667	13766603	Complement	T29A15.70	expressed protein	-2.38969	-1.52511	11.3882	-3.23646	-3.54599	5.40448	11.3882
At4g34190	16372394	16373630	Complement	F28A23.50	stress enhanced protein 1(SEP1)	4.25593	0.315561	-4.72933	-0.0456121	3.91236	-3.48596	4.72933		At3g01270	82695	84904	Complement	T4P13.4	pectate lyase family protein	-1.58539	-0.168922	11.3749	-6.52413	-1.5157	7.80169	11.3749
At5g59820	24120198	24121013	sense	MMN10.11	zinc finger (C2H2 type) familyprotein (ZAT12)	2.07831	1.28244	-4.69995	0.669214	3.04368	-2.41625	4.69995		At2g13620	5685088	5687703	sense	T10F5.16	cation/hydrogen exchangerputative (CHX15)	-2.32237	-1.77539	11.3646	-2.70721	-3.76046	4.77068	11.3646
At2g30150	12881783	12883199	sense	T27E13.11	UDP-glucoronosyl/UDP-glucosyltransferase family protein	1.14788	1.80773	-4.68533	0.986684	2.66334	-1.87907	4.68533		At2g26490	11275020	11276701	sense	T9J22.16	transducin family protein /WD-40 repeat family protein	-2.36025	-1.71666	11.3497	-3.01365	-3.7122	5.10337	11.3497
At3g56060	20814112	20816992	Complement	F27K19.3	glucose-methanol-choline (GMC)oxidoreductase family protein	3.74887	-0.591401	-4.68296	1.13291	2.4562	-4.62367	4.68296		At1g63060	23387708	23388703	sense	F16M19.2	expressed protein	-2.1462	-1.58862	11.3488	-2.98394	-3.40818	4.92807	11.3488
At3g47620	17569834	17571752	sense	F1P2.170	TCP family transcription factorputative	4.00227	0.011597	-4.68295	0.417612	3.36199	-3.82362	4.68295		At3g21160	7413853	7418416	Complement	MSA6.31	mannosyl-oligosaccharide12-alpha-mannosidase putative	-2.29028	-1.49309	11.3464	-3.0924	-3.43566	5.18628	11.3464
At4g18970	10389122	10390908	Complement	F13C5.1	GDSL-motif lipase/hydrolasefamily protein	0.756952	0.160434	-4.66969	3.33045	0.793343	-3.6332	4.66969		At4g11760	7079310	7080439	sense	T5C23.190	expressed protein	-1.65265	-0.267399	11.3402	-6.3694	-1.66298	7.70536	11.3402
At4g36250	17150941	17153581	sense	F23E13.140	aldehyde dehydrogenase familyprotein	-1.43971	4.03348	-4.66927	1.81787	1.97279	-0.310741	4.66927		At3g42820	14932025	14938020	Complement	T21C14.40	hypothetical protein	-2.0721	-1.36228	11.3336	-2.55745	-3.15394	4.51967	11.3336
At1g01170	73824	74724	Complement	T25K16.16	ozone-responsive stress-relatedprotein putative	1.99117	0.599917	-4.66666	1.50317	2.27046	-3.15509	4.66666		At5g28680	10719441	10722017	Complement	F4I4.60	protein kinase family protein	-2.01866	-1.7436	11.3205	-2.80786	-3.44232	4.5739	11.3205
At3g55680	20676664	20677294	Complement	F1I16.90	invertase/pectin methylesteraseinhibitor family protein	2.27894	0.778438	-4.66058	0.969692	2.7126	-2.90417	4.66058		At5g25550	8894182	8895483	sense	T14C9.90	leucine-rich repeat familyprotein / extensin family protein	-2.49995	-1.6679	11.3063	-2.97208	-3.79534	5.21255	11.3063
At3g43510	15414860	15416366	Complement	T18D12.80	copia-like retrotransposonfamilyhas a 2.3e-11 P-value blast match to GB:BAA11674 ORF(AA1-1338) (Ty1_Copia-element) [Nicotiana tabacum]	3.97128	-0.505055	-4.64393	0.894506	2.73982	-4.42305	4.64393		At2g02140	544706	545424	sense	F5O4.9	plant defensin-fusion proteinputative (PDF2.6)	-2.00752	-1.09734	11.3004	-4.06455	-2.76323	5.89732	11.3004
At5g16190	5283576	5286479	Complement	T21H19.110	glycosyl transferase family 2protein	-0.0205704	4.5108	-4.64016	0.0354397	3.75475	-0.0128789	4.64016		At5g50830	20700510	20702053	sense	K7B16.5	expressed protein	-2.3343	-1.41955	11.2947	-3.36445	-3.38569	5.48977	11.2947
At4g39460	18355987	18358887	Complement	F23K16.90	mitochondrial substrate carrierfamily protein	0.435101	2.19248	-4.63941	1.10643	2.32224	-1.34626	4.63941		At3g05960	1783593	1785340	Complement	F2O10.8	sugar transporter putative	-1.98312	-2.14458	11.2562	-2.74934	-3.79922	4.42428	11.2562
At2g24790	10573977	10575224	sense	F27C12.29	zinc finger (B-box type) familyprotein	0.160077	1.84854	-4.63838	2.03128	1.74588	-1.88966	4.63838		At3g29030	11012545	11014595	Complement	K5K13.14	expansin putative (EXP5)	-2.13919	-1.7417	11.2508	-2.87309	-3.5498	4.76243	11.2508
At1g32900	11920371	11923746	Complement	F9L11.8	starch synthase putative	3.67631	-0.407651	-4.61288	1.02884	2.66046	-4.27672	4.61288		At4g39110	18222477	18225113	Complement	T22F8.10	protein kinase family protein	-2.54658	-1.41004	11.2494	-3.13201	-3.5746	5.46963	11.2494
At2g44920	18531480	18533902	sense	T13E15.1	thylakoid lumenal 15 kDaprotein chloroplast	4.45399	-0.487746	-4.61003	0.542744	3.02999	-4.38629	4.61003		At1g74000	27832803	27835060	Complement	F2P9.13	strictosidine synthase familyprotein	-2.35691	-1.62868	11.2477	-3.06326	-3.62453	5.1758	11.2477
At3g01480	188392	190858	sense	F4P13.3	peptidyl-prolyl cis-transisomerase putative / cyclophilin putative / rotamaseputative	3.5075	1.10355	-4.60844	-0.329144	4.17171	-2.63556	4.60844		At1g68750	25826605	25831770	Complement	F14K14.14	phosphoenolpyruvate carboxylasefamily protein / PEP carboxylase family protein	-2.44789	-1.75648	11.232	-2.96446	-3.83335	5.13256	11.232
At1g74450	27986170	27987941	sense	F1M20.13	expressed protein	2.81813	0.495615	-4.60755	0.744703	2.89724	-3.1608	4.60755		At3g53470	19833722	19834471	sense	F4P12.170	expressed protein	-2.60343	-1.73506	11.2262	-2.83998	-3.96412	5.17116	11.2262
At2g18710	8119166	8121559	Complement	MSF3.9	preprotein translocase secYsubunit chloroplast (CpSecY)	2.17708	0.334933	-4.60282	1.29795	2.18588	-3.2303	4.60282		At3g20840	7300972	7303376	sense	MOE17.15	ovule development proteinputative	-1.39157	-0.365138	11.2063	-6.49351	-1.5249	7.39858	11.2063
At5g55530	22510166	22513182	sense	MTE17.25	C2 domain-containing protein	1.35475	1.41701	-4.59242	1.1632	2.47938	-2.2286	4.59242		At3g02480	512321	513034	sense	F16B3.11	ABA-responsive protein-related	-1.51719	-0.548315	11.2007	-5.10297	-1.80731	6.47268	11.2007
At1g67700	25377897	25379693	sense	F12A21.32	expressed protein	4.2363	0.293708	-4.5893	-0.0890512	3.87303	-3.44255	4.5893		At4g28000	13925462	13929286	sense	T13J8.110	AAA-type ATPase family protein	-2.2543	-1.62973	11.1771	-2.84877	-3.5556	4.89495	11.1771
At3g55080	20422412	20426874	Complement	T15C9.90	SET domain-containing protein	2.22025	0.774141	-4.58694	1.01511	2.64912	-2.88704	4.58694		At2g18180	7918136	7920777	Complement	F8D23.4	SEC14 cytosolic factor putative/ phosphoglyceride transfer protein putative	-1.86074	-1.89271	11.1743	-2.35235	-3.48343	3.9714	11.1743
At5g06290	1919249	1921404	sense	MHF15.19	2-cys peroxiredoxinchloroplast putative	3.14617	0.360363	-4.58343	0.662062	3.03654	-3.35714	4.58343		At5g48140	19535996	19537752	Complement	MIF21.3	polygalacturonase putative /pectinase putative	-2.03656	-1.05755	11.1559	-4.23664	-2.7445	6.0659	11.1559
At2g30570	13025520	13027271	Complement	T6B20.8	photosystem II reaction center W(PsbW) protein-related	3.3164	0.479324	-4.57928	0.338154	3.31688	-3.15634	4.57928		At2g13350	5543474	5544963	Complement	F15O11.1	C2 domain-containing protein	-2.37576	-1.65174	11.1117	-3.1776	-3.65078	5.27784	11.1117
At4g17560	9780292	9782194	sense	FCAALL.39	ribosomal protein L19 familyprotein	2.34453	0.313717	-4.57236	1.37481	2.30198	-3.3772	4.57236		At5g57810	23441501	23442873	Complement	MTI20.4	senescence-associatedprotein-related	-2.10557	-2.33592	11.0908	-2.47262	-4.10683	4.23581	11.0908
At4g27440	13725597	13727359	sense	F27G19.40	protochlorophyllide reductaseB chloroplast / PCR B / NADPH-protochlorophyllideoxidoreductase B (PORB)	-0.0391651	2.14133	-4.55888	1.94155	1.81192	-1.63066	4.55888		At3g18200	6234312	6236097	Complement	MRC8.19	nodulin MtN21 family protein	-2.09144	-1.57173	11.0788	-2.90483	-3.33521	4.76815	11.0788
At2g45340	18698796	18701776	sense	F4L23.15	leucine-rich repeattransmembrane protein kinase putative	-1.37987	1.6507	-4.54648	4.04866	0.235745	-1.97711	4.54648		At3g12630	4012615	4013590	sense	T2E22.6	zinc finger (AN1-like) familyprotein	-2.41413	-1.2027	11.0745	-3.5166	-3.23522	5.74588	11.0745
At1g73885	27790525	27791369	sense	F2P9.32	expressed protein	4.3032	0.116161	-4.54345	-0.0255245	3.62193	-3.4185	4.54345		At3g07800	2489393	2491017	Complement	F17A17.14	thymidine kinase putative	-2.46146	-1.33418	11.0736	-3.25904	-3.41983	5.53194	11.0736
At3g20200	7047587	7051266	sense	MAL21.21	protein kinase family protein	1.10942	1.71974	-4.54307	1.04938	2.53853	-1.90195	4.54307		At4g35670	16915001	16917206	sense	F8D20.180	glycoside hydrolase family 28protein / polygalacturonase (pectinase) family protein	-2.31214	-1.5154	11.0672	-2.94656	-3.48239	5.05094	11.0672
At3g16340	5539903	5546410	sense	T2O4.15	ABC transporter family protein	1.38789	1.07989	-4.54247	1.47897	2.18768	-2.55872	4.54247		At2g46210	18984417	18986074	sense	T3F17.14	delta-8 sphingolipid desaturaseputative	-2.57359	-1.38387	11.0548	-2.94166	-3.58559	5.32625	11.0548
At5g06870	2133919	2135162	sense	MOJ9.4	polygalacturonase inhibitingprotein 2 (PGIP2)	-1.04871	4.23848	-4.53553	1.18722	2.48683	-0.118079	4.53553		At3g51460	19103777	19108315	sense	F26O13.100	phosphoinositide phosphatasefamily protein	-2.15739	-1.75591	11.035	-2.81082	-3.58195	4.71184	11.035
At1g27360	9501064	9503856	sense	F17L21.14	squamosa promoter-bindingprotein-like 11 (SPL11)	0.769576	0.637245	-4.531	2.65051	1.2265	-3.02597	4.531		At4g31330	15202302	15203437	sense	F8F16.150	expressed protein	-1.74802	-2.22017	11.0234	-3.00392	-3.61725	4.39705	11.0234
At4g18570	10231229	10234704	sense	F28J12.230	proline-rich family protein	0.508229	3.19273	-4.52807	0.415308	3.25442	-0.799733	4.52807		At3g17940	6143525	6145324	Complement	MEB5.16	aldose 1-epimerase familyprotein	-1.99957	-1.51598	10.9901	-3.25384	-3.17878	5.01325	10.9901
At1g75350	28275742	28276481	sense	F1B16.11	ribosomal protein L31 familyprotein	3.05126	0.443062	-4.52348	0.615667	3.04042	-3.2205	4.52348		At4g16745	9411914	9414133	sense	FCAALL.132	exostosin family protein	-1.54219	-2.106	10.9614	-2.99786	-3.31272	4.18789	10.9614
At3g51480	19111655	19115804	sense	F26O13.120	glutamate receptor familyprotein (GLR3.6)	4.06545	0.64127	-4.51157	-0.386177	4.15603	-2.96662	4.51157		At1g07540	2318430	2321045	Complement	F22G5.8	telomere-binding proteinputative	-2.17788	-1.71108	10.9372	-2.65792	-3.56612	4.58842	10.9372
At2g40300	16838375	16840358	Complement	T3G21.7	ferritin putative	2.07383	0.730133	-4.50765	1.03436	2.49047	-2.80062	4.50765		At2g29940	12767216	12773700	sense	F23F1.14	ABC transporter family protein	-1.72635	-2.41456	10.9306	-2.56877	-3.80715	3.94915	10.9306
At1g12800	4361549	4365314	Complement	F13K23.5	S1 RNA-binding domain-containingprotein	3.48399	0.583666	-4.50754	0.0069651	3.60463	-2.91006	4.50754		At4g25040	12868184	12869465	sense	F13M23.180	integral membrane familyprotein	-1.88939	-0.308514	10.9123	-5.33625	-1.90642	7.17273	10.9123
At1g31650	11326282	11330644	Complement	F27M3.15	expressed protein	-0.0296471	1.39474	-4.50145	2.59911	1.18274	-2.18428	4.50145		At3g07790	2487375	2489226	sense	MLP3.24	DGCR14-related	-1.47794	-0.0481967	10.895	-6.79803	-1.31532	7.86357	10.895
At3g15970	5408803	5411114	Complement	MSL1.1	Ran-binding protein 1domain-containing protein / RanBP1 domain-containingprotein	0.960004	2.45838	-4.49586	0.540491	3.07062	-1.30413	4.49586		At3g20500	7157916	7160413	sense	K10D20.4	calcineurin-like phosphoesterasefamily protein	-2.27153	-1.62795	10.8897	-2.94662	-3.54708	4.96225	10.8897
At5g17990	5957215	5959906	sense	MCM23.6	anthranilatephosphoribosyltransferase	2.50337	0.116406	-4.49335	1.31258	2.24118	-3.50224	4.49335		At3g62140	23018252	23019601	sense	T17J13.100	expressed protein	-1.66037	-0.239869	10.8837	-6.13821	-1.64458	7.49553	10.8837
At5g35170	13436396	13440976	sense	T25C13.50	adenylate kinase familyprotein	3.86136	0.851394	-4.48803	-0.48808	4.27181	-2.68421	4.48803		At2g26450	11258198	11260690	sense	T9J22.12	pectinesterase family protein	-2.14856	-1.51843	10.8801	-3.42781	-3.30069	5.29616	10.8801
At3g17170	5852646	5854912	Complement	K14A17.25	ribosomal protein S6 familyprotein (RFC3)	0.796933	1.94311	-4.48328	1.07735	2.44403	-1.64331	4.48328		At3g28780	10807155	10809426	Complement	T19N8.7	glycine-rich protein	-1.68906	-0.502244	10.8776	-5.35889	-1.91129	6.83401	10.8776
At1g18740	6463985	6466445	sense	F6A14.15	expressed protein	0.5655	1.13767	-4.48297	2.21033	1.49238	-2.43245	4.48297		At5g27870	9878995	9881810	Complement	F14I23.30	pectinesterase family protein	-2.15975	-1.43326	10.8775	-2.96386	-3.26427	4.93889	10.8775
At5g65430	26165427	26167568	Complement	MNA5.16	14-3-3 protein GF14 kappa (GRF8)	1.23697	1.64166	-4.48269	0.868529	2.60867	-1.8574	4.48269		At1g55570	20761438	20763742	sense	T5A14.1	multi-copper oxidase type Ifamily protein	-1.47283	-0.174234	10.8669	-6.45201	-1.42407	7.54978	10.8669
At3g49640	18411764	18415791	Complement	T9C5.230	nitrogen regulation familyprotein	-0.431964	1.73037	-4.47381	2.71674	1.11279	-1.90398	4.47381		At5g24655	8440698	8441221	Complement	K18P6.1	expressed protein	-2.07291	-1.80188	10.856	-3.02592	-3.52059	4.78975	10.856
At5g64310	25739159	25739872	sense	MSJ1.15	arabinogalactan-protein (AGP1)	0.454715	-0.0116525	-4.46751	3.78229	0.381565	-3.68126	4.46751		At5g25880	9024552	9028380	sense	F18A17.1	malate oxidoreductase putative	-3.11319	-0.538181	10.8298	-3.20556	-3.1947	6.47465	10.8298
At5g07240	2271920	2274288	sense	T28J14.180	calmodulin-binding familyprotein	2.2649	1.41754	-4.46595	0.211419	3.37448	-2.13251	4.46595		At1g47280	17334499	17336846	Complement	T3F24.20	expressed protein	-1.96148	-1.63395	10.8074	-2.54321	-3.29853	4.27589	10.8074
At1g67740	25397731	25398817	Complement	F12A21.13	photosystem II core complexproteins psbY chloroplast (PSBY) / L-argininemetabolising enzyme	4.23122	0.555475	-4.46518	-0.421342	4.17332	-3.11401	4.46518		At5g59120	23881956	23885275	Complement	K18B18.11	subtilase family protein	-5.31499	-2.76714	10.8023	0.517659	-8.93551	3.79815	10.8023
At3g29160	11129862	11133313	Complement	MXE2.18	Snf1-related protein kinase(KIN11)	2.27336	0.781134	-4.45704	0.888733	2.70237	-2.80585	4.45704		At1g64800	24088749	24089096	sense	F13O11.33	expressed protein	-2.24586	-1.77062	10.801	-2.77763	-3.6656	4.73206	10.801
At2g34620	14584275	14585367	sense	T31E10.4	mitochondrial transcriptiontermination factor-related / mTERF-related	0.862152	2.33774	-4.44737	0.625371	2.87922	-1.29612	4.44737		At1g28270	9883025	9883857	sense	F3H9.8	rapid alkalinization factor (RALF)family protein	-1.87174	-0.570573	10.796	-5.08351	-2.13342	6.76169	10.796
At1g78600	29572104	29573752	sense	T30F21.7	zinc finger (B-box type) familyprotein	1.73063	2.14681	-4.4469	0.0149026	3.59921	-1.49634	4.4469		At5g19580	6607373	6609628	Complement	T20D1.100	glyoxal oxidase-related	-1.83779	-0.571084	10.7907	-5.20182	-2.10261	6.79783	10.7907
At1g54500	20360621	20361455	Complement	F20D21.31	rubredoxin family protein	3.67317	1.00802	-4.44471	-0.496534	4.2391	-2.58259	4.44471		At5g19600	6612823	6616999	Complement	T29J13.20	sulfate transporter putative	-3.04658	-1.83491	10.7581	-1.81119	-4.59292	4.55407	10.7581
At3g08710	2645223	2646496	sense	F17O14.18	thioredoxin family protein	2.14673	0.811925	-4.44372	0.894015	2.63505	-2.71529	4.44372		At3g46490	17126614	17130275	sense	F12A12.10	oxidoreductase 2OG-Fe(II)oxygenase family protein	-2.45032	-1.51235	10.7255	-2.99263	-3.59311	5.20333	10.7255
At1g12860	4382221	4386390	sense	F13K23.12	basic helix-loop-helix (bHLH)family protein / F-box family protein	-0.294942	1.45955	-4.44215	2.80661	1.00373	-2.09866	4.44215		At3g22620	8008541	8010024	sense	F16J14.17	protease inhibitor/seedstorage/lipid transfer protein (LTP) family protein	-2.28794	-1.70891	10.7137	-2.67825	-3.65585	4.69875	10.7137
At4g17600	9803718	9804855	sense	FCAALL.30	lil3 protein	2.74412	0.832777	-4.43135	0.318578	3.21224	-2.65002	4.43135		At2g43230	17973384	17976133	sense	F14B2.17	serine/threonine protein kinaseputative	-2.26403	-1.36275	10.7129	-3.14191	-3.27012	5.1908	10.7129
At5g14450	4658444	4660178	sense	F18O22.240	GDSL-motif lipase/hydrolasefamily protein	0.682693	0.141181	-4.41362	3.19922	0.712062	-3.44033	4.41362		At5g58170	23557487	23560318	Complement	MCK7.4	glycerophosphoryl diesterphosphodiesterase family protein	-2.31984	-1.42897	10.7125	-3.28325	-3.37462	5.34939	10.7125
At5g41410	16597272	16601236	sense	MYC6.12	homeodomain protein (BEL1)	2.47267	1.91985	-4.40736	-0.473722	4.17898	-1.65763	4.40736		At4g24640	12717798	12719027	sense	F22K18.160	invertase/pectinmethylesterase inhibitor family protein	-2.06758	-1.40693	10.6862	-3.50415	-3.11964	5.31165	10.6862
At2g33570	14224299	14226324	sense	F4P9.34	expressed protein	-0.828735	2.27077	-4.39607	2.53957	1.20796	-1.4049	4.39607		At3g06490	2004150	2006630	sense	F5E6.18	myb family transcription factor(MYB108)	-2.52785	-2.04872	10.6779	-2.25122	-4.24434	4.45373	10.6779
At5g13510	4341267	4342098	sense	T6I14.40	ribosomal protein L10 familyprotein	3.15488	0.824313	-4.38994	0.0833209	3.53216	-2.7603	4.38994		At1g04670	1301984	1302531	sense	T1G11.23	expressed protein	-2.10202	-1.09498	10.6734	-3.32834	-2.86919	5.33402	10.6734
At4g37550	17643575	17645823	sense	F6G17.3	formamidase putative / formamideamidohydrolase putative	1.39348	0.250717	-4.37494	2.21104	1.42381	-3.28575	4.37494		At3g54750	20275683	20279726	Complement	T5N23.110	expressed protein	-2.21614	-1.34883	10.6489	-3.39641	-3.20225	5.37938	10.6489
At4g39400	18324655	18328820	sense	F23K16.30	brassinosteroid insensitive 1(BRI1)	0.141107	1.22349	-4.37356	2.56199	1.1874	-2.32248	4.37356		At2g33670	14252106	14255007	sense	F4P9.44	seven transmembrane MLO familyprotein / MLO-like protein 5 (MLO5)	-2.43903	-1.63325	10.6311	-2.62453	-3.72394	4.80797	10.6311
At2g37220	15641605	15643470	Complement	F3G5.1	29 kDa ribonucleoproteinchloroplast putative / RNA-binding protein cp29putative	2.91952	0.176395	-4.35994	0.863003	2.65321	-3.37756	4.35994		At4g02140	949617	950270	Complement	T10M13.15	expressed protein	-2.25277	-1.57127	10.6219	-2.76931	-3.49393	4.80593	10.6219
At1g17200	5878422	5879984	sense	F20D23.10	integral membrane familyprotein	0.202906	0.75006	-4.35763	3.05506	0.828795	-2.80032	4.35763		At1g22150	7818350	7821333	sense	F2E2.22	sulfate transporter (Sultr1	-2.05614	-1.64965	10.6135	-2.5947	-3.39112	4.40187	10.6135
At1g32990	11955768	11957264	sense	F9L11.15	ribosomal protein L11 familyprotein	2.32402	0.763987	-4.3518	0.834681	2.72491	-2.79128	4.3518		At4g26260	13297948	13300186	sense	T25K17.70	expressed protein	-2.4477	-1.3373	10.6061	-2.46216	-3.46807	4.7741	10.6061
At5g08380	2694678	2697688	Complement	F8L15.110	alpha-galactosidase putative /melibiase putative / alpha-D-galactosidegalactohydrolase putative	1.74354	-0.165841	-4.3437	2.2263	1.33927	-3.73939	4.3437		At5g39880	15988115	15989465	sense	MYH19.7	expressed protein	-1.80208	-0.857111	10.597	-4.80846	-2.33743	6.30045	10.597
At1g65450	24321527	24322727	sense	T8F5.23	transferase family protein	-1.64528	4.13453	-4.32894	1.72384	1.88115	-0.0662624	4.32894		At1g28430	9992972	9994628	Complement	F3M18.13	cytochrome P450 putative	-1.96615	-2.23677	10.5933	-2.62232	-3.86163	4.2484	10.5933
At5g03930	1059509	1060042	sense	F8F6.140	expressed protein	1.68916	0.945738	-4.32684	0.944088	2.37334	-2.36563	4.32684		At3g28720	10783513	10785684	sense	T19N8.1	expressed protein	-1.69739	-0.239893	10.575	-5.58338	-1.67734	7.13088	10.575
At4g11280	6864093	6866112	sense	F8L21.70	1-aminocyclopropane-1-carboxylate synthase 6 / ACCsynthase 6 (ACS6)	0.198442	2.16922	-4.32413	1.42671	2.05878	-1.40564	4.32413		At2g39510	16498221	16500210	Complement	F12L6.17	nodulin MtN21 family protein	-4.74624	-0.163129	10.5734	-2.11939	-4.12961	7.03172	10.5734
At5g13980	4508498	4514668	sense	MAC12.38	glycosyl hydrolase family 38protein	-0.885227	1.52884	-4.32328	3.34141	0.548329	-1.93608	4.32328		At1g04880	1375960	1379175	Complement	F13M7.13	high mobility group (HMG1/2)family protein / ARID/BRIGHT DNA-binding domain-containingprotein	-2.08555	-1.98926	10.5427	-2.45402	-3.75249	4.23381	10.5427
At2g28000	11933543	11936466	sense	T1E2.8	RuBisCO subunit binding-proteinalpha subunit chloroplast / 60 kDa chaperonin alphasubunit / CPN-60 alpha	0.926324	1.32942	-4.31402	1.56277	1.99064	-2.19413	4.31402		At5g56640	22944555	22946869	Complement	MIK19.9	expressed protein	-1.91404	-1.44574	10.5349	-2.56831	-3.07195	4.29577	10.5349
At4g04890	2476487	2482307	Complement	T1J1.3	homeobox-leucine zipper proteinprotodermal factor 2 (PDF2)	-1.58223	1.93821	-4.30509	3.75524	0.300245	-1.62734	4.30509		At1g68110	25528381	25529813	sense	T23K23.4	epsin N-terminal homology (ENTH)domain-containing protein / clathrin assemblyprotein-related	-2.03815	-1.23821	10.4984	-3.76693	-2.92018	5.53503	10.4984
At4g39040	18189006	18190550	Complement	F19H22.140	expressed protein	1.9654	1.65556	-4.28351	0.162649	3.31912	-1.83252	4.28351		At3g28760	10794192	10796541	Complement	T19N8.5	expressed protein	-1.13607	-0.115156	10.4807	-6.60242	-1.08133	7.22554	10.4807
At3g54170	20067729	20070497	sense	F24B22.130	FKBP12 interacting protein(FIP37)	3.0928	0.924769	-4.28155	-0.0352459	3.58236	-2.59313	4.28155		At1g16360	5593487	5595173	Complement	F3O9.16	LEM3 (ligand-effect modulator 3)family protein / CDC50 family protein	-2.17392	-1.71107	10.4713	-2.50686	-3.56666	4.42303	10.4713
At3g26480	9688510	9692064	Complement	F20C19.21	transducin family protein /WD-40 repeat family protein	2.02313	1.4867	-4.27462	0.268468	3.20184	-1.98241	4.27462		At3g28770	10797953	10804474	sense	T19N8.6	expressed protein	-1.45898	0.0182489	10.4674	-6.75322	-1.23987	7.77894	10.4674
At1g53730	20065398	20069369	sense	F22G10.31	leucine-rich repeattransmembrane protein kinase putative	-0.277203	1.55952	-4.27391	2.32715	1.09602	-1.70304	4.27391		At1g79450	29892582	29895072	sense	T8K14.13	LEM3 (ligand-effect modulator 3)family protein / CDC50 family protein	-2.15454	-1.74288	10.4281	-2.50477	-3.5792	4.3953	10.4281
At5g67280	26859496	26862416	Complement	K3G17.4	leucine-rich repeat transmembraneprotein kinase putative	-0.340908	3.1852	-4.26905	1.1057	2.38952	-0.655628	4.26905		At1g75160	28213098	28215465	sense	F22H5.11	expressed protein	-2.12635	-1.74274	10.4222	-2.40716	-3.55958	4.27095	10.4222
At3g60720	22452746	22454746	sense	T4C21.130	receptor-like proteinkinase-related	3.55967	0.998949	-4.26405	-0.529579	4.12103	-2.4631	4.26405		At2g46140	18966151	18967620	sense	T3F17.21	late embryogenesis abundantprotein putative / LEA protein putative	-3.5375	-2.74194	10.3822	-0.681774	-6.27361	3.71229	10.3822
At2g36990	15544337	15547218	Complement	T1J8.17	RNA polymerase sigma subunit SigF(sigF) / sigma-like factor (SIG6)	2.63205	0.061516	-4.26365	1.15637	2.29732	-3.42685	4.26365		At3g51560	19132787	19136892	Complement	F26O13.200	disease resistance protein(TIR-NBS-LRR class) putative	-1.49042	-2.18019	10.3671	-2.90796	-3.32986	4.03385	10.3671
At3g08040	2566283	2569505	Complement	F17A17.38	MATE efflux family protein	1.32044	1.64117	-4.26111	0.638396	2.69806	-1.71849	4.26111		At3g51270	19044830	19047751	sense	F24M12.310	RIO1 family protein	-3.03784	-0.866789	10.3602	-2.70086	-3.48136	5.69208	10.3602
At2g06925	2842350	2843298	Complement	T4E14.19	phospholipase A2 family protein	-1.29957	2.72236	-4.25115	2.485	1.1358	-0.943164	4.25115		At1g08730	2779966	2788398	sense	F22O13.200	myosin heavy chain (PCR43)	-1.93434	-1.51246	10.3538	-2.40361	-3.17553	4.16049	10.3538
At1g60000	22097234	22098291	Complement	T2K10.5	29 kDa ribonucleoproteinchloroplast putative / RNA-binding protein cp29putative	1.59025	2.20387	-4.24131	-0.039998	3.51309	-1.32789	4.24131		At1g31750	11370640	11372058	Complement	F27M3.1	proline-rich family protein	-1.64204	-1.92003	10.3386	-2.92444	-3.23641	4.24232	10.3386
At2g40270	16829012	16831560	Complement	T3G21.4	protein kinase family protein	3.16681	0.683961	-4.23971	0.0788867	3.40167	-2.76038	4.23971		At3g15240	5134601	5135909	sense	K7L4.4	expressed protein	-1.55958	-1.93802	10.3241	-2.80874	-3.18616	4.05829	10.3241
At3g32290	13244944	13246999	sense	F6H5.22	gypsy-like retrotransposon familyhas a 9.0e-22 P-value blast match to GB:AAD19359polyprotein (gypsy_Ty3-element) [Sorghum bicolor]	0.672852	0.822043	-4.23718	2.28471	1.30642	-2.60269	4.23718		At1g48470	17917379	17919766	sense	T1N15.8	glutamine synthetase putative	-2.62406	-0.915772	10.3177	-3.13021	-3.15252	5.68048	10.3177
At4g23570	12299857	12302701	sense	F9D16.40	phosphatase-related	1.01742	0.882116	-4.23639	1.78583	1.67138	-2.49907	4.23639		At2g22950	9773207	9776846	sense	T20K9.16	calcium-transporting ATPaseplasma membrane-type putative / Ca2+-ATPase putative(ACA7)	-1.88571	-1.47753	10.2962	-2.85695	-3.05927	4.53441	10.2962
At2g15320	6673398	6674786	Complement	F27O10.3	leucine-rich repeat familyprotein	0.662442	1.12109	-4.22517	1.88781	1.56725	-2.2445	4.22517		At1g13970	4779520	4782531	Complement	F16A14.19	expressed protein	-2.31728	-1.32513	10.2959	-3.06147	-3.28524	5.17296	10.2959
At3g11590	3660383	3663740	sense	F24K9.26	expressed protein	2.47166	1.4214	-4.22311	-0.122141	3.60057	-1.986	4.22311		At1g79250	29815034	29817111	Complement	YUP8H12R.15	protein kinase putative	-2.27456	-1.77535	10.2688	-2.54985	-3.71024	4.53508	10.2688
At5g55220	22414842	22418062	sense	MCO15.17	trigger factor type chaperonefamily protein	2.9376	0.349308	-4.20644	0.582896	2.84553	-3.0867	4.20644		At5g39400	15783265	15785472	sense	MUL8.8	pollen specific phosphataseputative / phosphatase and tensin putative (PTEN1)	-2.07089	-1.49404	10.2582	-3.10375	-3.21754	4.9052	10.2582
At2g47590	19528867	19531133	sense	T30B22.11	photolyase/blue lightphotoreceptor (PHR2)	2.11184	0.279835	-4.18759	1.34014	2.06923	-3.12253	4.18759		At3g26810	9869082	9871877	sense	MDJ14.9	transport inhibitor responseprotein putative	-1.89523	-1.2116	10.2511	-3.18317	-2.79644	4.91382	10.2511
At1g07440	2286296	2287685	Complement	F22G5.39	tropinone reductase putative /tropine dehydrogenase putative	3.4967	-0.105269	-4.18663	0.57458	2.83343	-3.57181	4.18663		At2g38400	16090769	16093427	sense	T19C21.11	alanine--glyoxylateaminotransferase putative / beta-alanine-pyruvateaminotransferase putative / AGT putative	-1.41216	-1.44905	10.2295	-4.25537	-2.53823	5.2266	10.2295
At3g49440	18346700	18347302	Complement	T9C5.40	F-box family protein-related	1.25765	-0.0112372	-4.1842	2.54977	1.07024	-3.4511	4.1842		At1g43630	16438811	16440067	Complement	T10P12.8	expressed protein	-2.11042	-1.68594	10.2177	-2.8508	-3.44563	4.65908	10.2177
At2g24270	10334132	10336955	Complement	F27D4.18	NADP-dependentglyceraldehyde-3-phosphate dehydrogenase putative	1.13535	-0.552225	-4.17028	3.35095	0.49152	-4.09296	4.17028		At1g71880	27057842	27060001	sense	F17M19.3	sucrose transporter /sucrose-proton symporter (SUC1)	-0.832328	-2.3	10.2152	-3.80439	-2.77476	4.12089	10.2152
At5g18500	6138491	6141632	sense	F20L16.220	protein kinase family protein	-0.564941	1.63949	-4.16778	2.65343	0.916478	-1.71297	4.16778		At5g66020	26418493	26421917	Complement	K2A18.9	phosphoinositide phosphatasefamily protein	-2.12531	-1.7143	10.201	-2.6942	-3.50676	4.54533	10.201
At2g30010	12812801	12816462	sense	F23F1.7	expressed protein	2.24669	-0.27769	-4.1622	1.84362	1.66244	-3.75232	4.1622		At4g36600	17263656	17265155	sense	AP22.17	late embryogenesis abundantdomain-containing protein / LEA domain-containing protein	-2.11417	-1.74244	10.1969	-2.82781	-3.5089	4.64254	10.1969
At1g66180	24650851	24652476	sense	F15E12.7	aspartyl protease familyprotein	0.957745	0.137272	-4.16077	2.70865	0.945747	-3.27959	4.16077		At1g79910	30059803	30062063	sense	F19K16.13	expressed protein	-2.12599	-1.79234	10.1962	-2.80167	-3.56908	4.6215	10.1962
At1g44920	16985344	16986849	Complement	F27F5.3	expressed protein	3.52712	0.276071	-4.15907	0.0968057	3.25893	-3.04966	4.15907		At3g47230	17403084	17404684	Complement	F13I12.280	expressed protein	-5.16372	0.247395	10.1791	-2.18324	-3.94314	7.80164	10.1791
At1g79040	29740911	29741831	sense	YUP8H12R.34	photosystem II 10 kDapolypeptide	3.32776	0.57496	-4.15739	0.00287785	3.42633	-2.81356	4.15739		At1g25240	8845218	8846480	sense	F4F7.37	epsin N-terminal homology (ENTH)domain-containing protein / clathrin assemblyprotein-related	-2.21275	-1.62845	10.1789	-3.00109	-3.47521	4.90959	10.1789
At5g58090	23522592	23524514	Complement	K21L19.12	glycosyl hydrolase family 17protein	-0.983527	1.26534	-4.15025	3.68642	0.247854	-2.12436	4.15025		At5g16100	5258554	5259722	Complement	T21H19.20	hypothetical protein	-2.05487	-1.60875	10.1557	-2.788	-3.32764	4.56632	10.1557
At4g23670	12332570	12333814	Complement	F9D16.140	major latex protein-related /MLP-related	1.69783	0.305541	-4.13941	1.7095	1.73853	-3.08867	4.13941		At3g01620	235204	236932	Complement	F4P13.16	glycosyl transferase family 17protein	-2.32971	-2.06965	10.1351	-2.20019	-4.07011	4.19683	10.1351
At2g19620	8493073	8495733	Complement	F3P11.22	Ndr family protein	2.32166	-0.163492	-4.13935	1.57908	1.82412	-3.59218	4.13935		At5g54095	21969959	21970723	Complement	MJP23.1	expressed protein	-1.82744	-1.1537	10.1323	-3.33219	-2.67332	4.98804	10.1323
At2g06050	2359111	2362176	Complement	F5K7.19	12-oxophytodienoate reductase(OPR3) / delayed dehiscence1 (DDE1)	2.57636	0.0205019	-4.13396	1.16349	2.21158	-3.37874	4.13396		At1g57550	21316206	21316474	Complement	T8L23.2	hydrophobic protein putative /low temperature and salt responsive protein putative	-2.02141	-1.46587	10.1271	-2.90433	-3.16299	4.69829	10.1271
At4g24750	12758432	12760870	Complement	F22K18.50	expressed protein	1.84477	0.0358102	-4.13198	1.60528	1.60591	-3.25912	4.13198		At1g76370	28653343	28655378	Complement	F15M4.13	protein kinase putative	-1.94832	-1.59978	10.1241	-2.91205	-3.21838	4.58843	10.1241
At3g46930	17296628	17299017	sense	T6H20.40	protein kinase family protein	3.08131	0.520312	-4.12434	0.240291	3.14799	-2.85519	4.12434		At1g66210	24669292	24672446	Complement	T6J19.3	subtilase family protein	-2.11591	-1.40887	10.1208	-2.97078	-3.18129	4.83825	10.1208
At3g15500	5234627	5236095	sense	MJK13.16	no apical meristem (NAM) familyprotein (NAC3)	-0.64745	2.60873	-4.1234	1.84269	1.64549	-1.00752	4.1234		At3g53040	19675652	19677465	Complement	F8J2.210	late embryogenesis abundantprotein putative / LEA protein putative	-2.02071	-1.55954	10.1188	-3.01576	-3.23661	4.75303	10.1188
At1g19050	6577824	6579102	Complement	F14D16.20	two-component responsiveregulator / response regulator 7 (ARR7)	-0.0825239	1.09318	-4.12232	2.69141	0.876104	-2.20383	4.12232		At5g06760	2089493	2090431	Complement	MPH15.12	late embryogenesis abundantgroup 1 domain-containing protein / LEA group 1domain-containing protein	-1.18352	-2.19575	10.1176	-3.49316	-3.02071	4.22537	10.1176
At1g62180	22979195	22981267	Complement	F19K23.11	5'-adenylylsulfate reductase 2chloroplast (APR2) (APSR) / adenosine 5'-phosphosulfate5'-adenylylsulfate (APS) sulfotransferase 2 /3'-phosphoadenosine-5'-phosphosulfate (PAPS) reductasehomolog 43 (PRH-43)	3.48937	0.119185	-4.11002	0.305247	3.06634	-3.26435	4.11002		At4g01430	585609	588028	sense	F3D13.4	nodulin MtN21 family protein	0.166778	-3.09382	10.0948	-3.79894	-2.48006	3.02528	10.0948
At3g29200	11165630	11167653	Complement	MXO21.4	chorismate mutase chloroplast(CM1)	1.48088	2.6978	-4.10722	-0.365599	3.81222	-0.950813	4.10722		At5g47470	19271825	19273605	sense	MNJ7.6	nodulin MtN21 family protein	-2.05822	-1.61556	10.0865	-2.69837	-3.34708	4.4944	10.0865
At3g63460	23441619	23448319	Complement	MAA21.90	WD-40 repeat family protein	2.68009	0.431117	-4.10669	0.666004	2.70889	-2.94553	4.10669		At2g19010	8250171	8252460	sense	F19F24.4	GDSL-motif lipase/hydrolasefamily protein	-2.40248	-1.58503	10.0782	-2.58264	-3.63641	4.71757	10.0782
At5g64850	25938670	25940580	sense	MXK3.7	expressed protein	0.580647	3.55499	-4.09509	-0.243972	3.65351	-0.289125	4.09509		At1g07850	2426742	2428537	sense	F24B9.5	fringe-related protein	-2.22296	-1.90833	10.073	-2.51178	-3.78389	4.41094	10.073
At3g47210	17396298	17398229	sense	F13I12.260	expressed protein	-0.231222	1.86676	-4.08689	2.06595	1.40341	-1.55884	4.08689		At1g58120	21524066	21526122	sense	T18I24.4	expressed protein	-2.0324	-1.60944	10.0685	-2.85355	-3.30775	4.61539	10.0685
At1g70090	26404453	26406060	sense	F20P5.18	glycosyl transferase family 8protein	1.19186	0.520407	-4.08634	1.90679	1.49465	-2.78368	4.08634		At4g30850	15020188	15022451	Complement	T10C21.5	expressed protein	-2.46761	-2.16076	10.067	-1.24686	-4.52103	3.41227	10.067
At3g12900	4104583	4106119	sense	MJM20.4	oxidoreductase 2OG-Fe(II)oxygenase family protein	2.14666	0.572391	-4.08354	0.920957	2.38527	-2.7294	4.08354		At3g45250	16594708	16595133	sense	F18N11.10	gypsy-like retrotransposonfamilyhas a 9.2e-08 P-value blast match to GB:AAD22153polyprotein (Gypsy_Ty3-element) [Sorghum bicolor]	-2.01112	-1.34141	10.0638	-2.60064	-3.05359	4.43835	10.0638
At3g02250	423808	427068	Complement	F14P3.10	expressed protein	0.3075	1.53322	-4.07982	1.68146	1.61053	-1.72633	4.07982		At1g01980	340374	341999	Complement	F22M8.11	FAD-binding domain-containingprotein	-1.99557	-1.2918	10.0621	-3.36896	-2.94381	5.10656	10.0621
At2g36250	15204448	15207682	Complement	F2H17.14	chloroplast division proteinFtsZ (FtsZ2-1)	1.86025	1.41803	-4.07865	0.320591	2.98207	-1.89113	4.07865		At3g44000	15798214	15799726	Complement	T15B3.140	Mutator-like transposase familyhas a 1.9e-07 P-value blast match to GB:AAA21566 mudrA oftransposon='MuDR' (MuDr-element) [Zea mays]	-2.01865	-1.5066	10.0616	-2.53313	-3.22009	4.32804	10.0616
At3g51420	19095014	19096837	sense	F26O13.60	strictosidine synthase familyprotein	2.16395	-0.0983717	-4.06802	1.58095	1.75215	-3.44377	4.06802		At3g61710	22850300	22853407	Complement	F15G16.100	autophagy protein Apg6 family	-2.37778	-1.85784	10.0299	-2.12874	-3.92052	4.20606	10.0299
At1g24070	8516426	8519723	Complement	T23E23.23	glycosyl transferase family 2protein	0.0264881	2.41825	-4.06256	1.14109	2.09867	-1.00632	4.06256		At2g41210	17180491	17183885	sense	T3K9.2	phosphatidylinositol-4-phosphate5-kinase family protein	-1.35957	-2.10759	10.0253	-3.10177	-3.12473	4.07386	10.0253
At1g73655	27694020	27695475	Complement	F25P22.7	immunophilin / FKBP-typepeptidyl-prolyl cis-trans isomerase family protein	3.56008	0.64284	-4.05403	-0.317546	3.70836	-2.66875	4.05403		At4g15980	9057478	9059995	Complement	FCAALL.248	pectinesterase family protein	-2.9531	-0.527577	10.0233	-3.23189	-3.04121	6.22564	10.0233
At3g04760	1303581	1305884	Complement	F7O18.25	pentatricopeptide (PPR)repeat-containing protein	2.29428	0.436434	-4.04813	0.921505	2.37917	-2.86182	4.04813		At3g06260	1893810	1894865	Complement	F28L1.20	galactinol synthase putative	-2.10422	-1.63395	10.0228	-2.84944	-3.3919	4.66438	10.0228
At1g31800	11396383	11400071	sense	F5M6.19	cytochrome P450 family protein	3.24181	1.16426	-4.04761	-0.589674	4.01817	-2.16357	4.04761		At3g47400	17476575	17479103	sense	T21L8.150	pectinesterase family protein	-2.07088	-1.78323	9.96598	-2.98976	-3.48879	4.72136	9.96598
At2g28190	12021579	12023620	sense	F24D13.2	superoxide dismutase [Cu-Zn]chloroplast (SODCP) / copper/zinc superoxide dismutase(CSD2)	1.02334	1.16527	-4.04633	1.29923	1.94487	-2.06252	4.04633		At2g28355	12126397	12127331	sense	T1B3.2	expressed protein	-1.8101	-0.826808	9.96569	-4.31579	-2.32261	5.88534	9.96569
At3g47836	17661246	17662750	Complement	T23J7.1	expressed protein	1.79236	1.5118	-4.04423	0.281154	3.00151	-1.79378	4.04423		At3g02810	608467	610992	Complement	F13E7.25	protein kinase family protein	-1.98316	-1.64935	9.96365	-3.05465	-3.27926	4.71639	9.96365
At5g22640	7529371	7533787	sense	MDJ22.6	MORN (Membrane Occupation andRecognition Nexus) repeat-containing protein	1.27881	0.673457	-4.04002	1.67924	1.70889	-2.63721	4.04002		At4g10440	6459724	6461928	Complement	F7L13.20	dehydration-responsive familyprotein	-2.69122	-1.66225	9.95222	-2.10375	-4.02488	4.5194	9.95222
At5g54630	22209725	22211534	Complement	MRB17.13	zinc finger protein-related	0.590326	2.47188	-4.02721	0.577274	2.7066	-1.01361	4.02721		At3g28740	10789935	10791790	Complement	T19N8.17	cytochrome P450 family protein	-2.42897	-1.68559	9.9304	-2.59946	-3.74874	4.72182	9.9304
At3g12685	4029190	4030362	Complement	MBK21.6	expressed protein	0.14044	0.677227	-4.02517	2.9115	0.710888	-2.61537	4.02517		At1g03850	976099	977760	Complement	F21M11.22	glutaredoxin family protein	-1.1929	-2.35969	9.92425	-2.93869	-3.19943	3.7347	9.92425
At5g47190	19181475	19183334	Complement	MQL5.4	ribosomal protein L19 familyprotein	2.09632	0.883942	-4.01819	0.621786	2.65359	-2.38885	4.01819		At3g28950	10977345	10978729	Complement	K5K13.15	avirulence-responsiveprotein-related / avirulence induced gene (AIG)protein-related	-1.60641	-0.0142171	9.92236	-6.19023	-1.39514	7.44217	9.92236
At1g17745	6100957	6105258	sense	F11A6.8	D-3-phosphoglyceratedehydrogenase / 3-PGDH	0.0647457	3.58365	-4.01238	0.147387	3.09746	-0.183094	4.01238		At5g24240	8231113	8232928	Complement	MOP9.5	phosphatidylinositol 3- and4-kinase family protein / ubiquitin family protein	-1.92657	-1.6879	9.89787	-2.83392	-3.28326	4.46937	9.89787
At3g53090	19690186	19695622	sense	T4D2.20	HECT-domain-containing protein /ubiquitin-transferase family protein / IQcalmodulin-binding motif-containing protein	2.74572	0.372126	-4.01008	0.546168	2.70514	-2.88438	4.01008		At3g21870	7703878	7704836	Complement	MEK6.1	cyclin family protein	-2.05697	-1.84196	9.87676	-2.61952	-3.55922	4.36298	9.87676
At3g04730	1288618	1290608	Complement	F7O18.22	auxin-responsive protein /indoleacetic acid-induced protein 16 (IAA16)	2.72887	-0.222261	-4.00507	1.15152	2.09175	-3.54878	4.00507		At3g22880	8097694	8100827	Complement	F5N5.6	meiotic recombination proteinputative	-0.274759	-2.42643	9.8535	-4.11603	-2.34889	3.76304	9.8535
At2g31810	13531299	13535578	sense	F20M17.15	acetolactate synthase smallsubunit putative	1.29062	0.869851	-3.99634	1.35435	1.90687	-2.35662	3.99634		At1g78940	29685750	29688855	Complement	YUP8H12R.45	protein kinase familyprotein	-2.61604	-1.95561	9.83337	-1.66348	-4.28595	3.94094	9.83337
At5g49760	20233598	20238525	sense	K2I5.13	leucine-rich repeat familyprotein / protein kinase family protein	2.74411	0.31058	-3.98606	0.626129	2.63979	-2.9593	3.98606		At2g47050	19338755	19339716	Complement	F14M4.12	invertase/pectin methylesteraseinhibitor family protein	-1.57966	-0.01725	9.8193	-6.11068	-1.37461	7.33889	9.8193
At3g29290	11239348	11241516	sense	MMF24.4	pentatricopeptide (PPR)repeat-containing protein	-0.294871	1.7533	-3.98031	2.10384	1.25079	-1.5267	3.98031		At3g56550	20963875	20965620	Complement	T5P19.200	pentatricopeptide (PPR)repeat-containing protein	-1.87779	-1.79826	9.81116	-2.78018	-3.33939	4.33887	9.81116
At1g55490	20719229	20722831	Complement	T5A14.11	RuBisCO subunit binding-proteinbeta subunit chloroplast / 60 kDa chaperonin beta subunit/ CPN-60 beta	1.46156	0.654255	-3.97808	1.43994	1.85667	-2.59726	3.97808		At3g01250	79312	80112	sense	T4P13.6	expressed protein	-1.89016	-0.823422	9.80542	-4.15923	-2.39129	5.82562	9.80542
At1g02190	415079	418010	sense	T7I23.9	CER1 protein putative	-0.404427	2.53283	-3.97174	1.51824	1.79611	-0.947708	3.97174		At2g30290	12919967	12922858	Complement	T9D9.10	vacuolar sorting receptorputative	-1.93568	-1.55698	9.79856	-2.60697	-3.18414	4.29714	9.79856
At5g39860	15974645	15975683	sense	MYH19.1	bHLH protein	-1.40229	3.85975	-3.97048	1.41558	1.86445	-0.0129549	3.97048		At1g54860	20461088	20462232	Complement	T22H22.25	expressed protein	-2.04246	-1.84943	9.78684	-2.6768	-3.54671	4.39761	9.78684
At5g36170	14253106	14255256	Complement	MAB16.12	peptide chain release factorputative	2.55121	0.543647	-3.96647	0.479067	2.72107	-2.65085	3.96647		At5g03250	774590	776854	sense	F15A17.280	phototropic-responsive NPH3family protein	-2.34437	-1.77497	9.7822	-2.35292	-3.78069	4.39566	9.7822
At1g01080	45309	47019	Complement	T25K16.19	33 kDa ribonucleoproteinchloroplast putative / RNA-binding protein cp33putative	2.74463	-0.198955	-3.9651	1.12699	2.13785	-3.49761	3.9651		At4g03290	1442634	1443499	sense	F4C21.22	calcium-binding proteinputative	-1.89145	-1.56675	9.73823	-3.12117	-3.11497	4.69969	9.73823
At2g43750	18136488	18139629	Complement	F18O19.14	cysteine synthase chloroplast/ O-acetylserine (thiol)-lyase / O-acetylserinesulfhydrylase / cpACS1 (OASB)	3.41662	-0.0712752	-3.96486	0.367848	2.74286	-3.27608	3.96486		At2g41970	17527595	17529722	Complement	T6D20.14	protein kinase putative	-2.05057	-1.64062	9.73092	-2.352	-3.38934	4.15166	9.73092
At3g52120	19339691	19342948	sense	F4F15.230	SWAP(Suppressor-of-White-APricot)/surp domain-containingprotein / D111/G-patch domain-containing protein	1.91401	0.7409	-3.96143	0.945097	2.33791	-2.53118	3.96143		At1g63180	23431076	23433238	Complement	F16M19.8	UDP-glucose 4-epimeraseputative / UDP-galactose 4-epimerase putative /Galactowaldenase putative	-1.37499	-1.66676	9.71733	-3.21534	-2.73135	4.24083	9.71733
At1g78210	29427611	29429268	Complement	T11I11.15	hydrolase alpha/beta foldfamily protein	-1.00681	3.04172	-3.96048	1.67867	1.6443	-0.559628	3.96048		At5g08480	2743621	2745112	sense	MAH20.4	VQ motif-containing protein	-2.19739	-1.67515	9.70461	-2.35133	-3.54604	4.26404	9.70461
At4g15780	8979890	8981773	Complement	FCAALL.378	synaptobrevin-related familyprotein	-0.0763938	2.13494	-3.95558	1.46344	1.76834	-1.18945	3.95558		At5g20790	7039913	7040656	Complement	T1M15.190	expressed protein	-1.93737	-1.81911	9.70061	-2.548	-3.42793	4.17497	9.70061
At5g32450	12096848	12098803	sense	F18O9.60	RNA recognition motif(RRM)-containing protein	0.194408	1.13958	-3.95521	2.2311	1.16157	-2.09267	3.95521		At2g32460	13789285	13791548	Complement	T26B15.2	myb family transcription factor(MYB101)	-2.137	-1.69528	9.684	-2.63951	-3.48343	4.46481	9.684
At3g13674	4474784	4475888	Complement	MMM17.23	expressed protein	0.644535	1.53707	-3.94817	1.32397	1.92255	-1.72279	3.94817		At3g16000	5430895	5433823	Complement	MSL1.8	matrix-localized MAR DNA-bindingprotein-related	-1.77538	-1.46289	9.67347	-2.50429	-2.96188	4.08116	9.67347
At5g15740	5134530	5137629	Complement	F14F8.120	expressed protein	-0.0558441	3.13833	-3.9465	0.570712	2.61289	-0.444204	3.9465		At3g55150	20451527	20453581	Complement	T26I12.30	exocyst subunit EXO70 familyprotein	-2.24689	-1.54201	9.65813	-2.3053	-3.47761	4.31511	9.65813
At1g74970	28161191	28162930	Complement	F9E10.18	ribosomal protein S9 (RPS9)	2.24934	0.381679	-3.94518	1.01859	2.2843	-2.89765	3.94518		At1g24520	8688617	8689251	sense	F21J9.18	anther-specific protein agp1	-1.73931	-0.921147	9.63831	-4.37599	-2.3418	5.76547	9.63831
At1g16350	5590945	5592866	sense	F3O9.15	inosine-5'-monophosphatedehydrogenase putative	-0.704774	1.2974	-3.94168	3.04099	0.508054	-1.86247	3.94168		At1g16290	5570747	5573532	Complement	F3O9.9	expressed protein	-2.23572	-1.64786	9.63604	-2.20493	-3.58023	4.18688	9.63604
At5g07580	2399690	2400464	sense	T2I1.290	ethylene-responsiveelement-binding family protein	3.49539	0.680552	-3.93969	-0.393048	3.68922	-2.5454	3.93969		At5g14380	4635800	4636679	Complement	F18O22.170	hydroxyproline-richglycoprotein family protein	-1.458	-0.0671834	9.63052	-6.12407	-1.31506	7.14502	9.63052
At4g23820	12397048	12400101	Complement	F9D16.290	glycoside hydrolase family 28protein / polygalacturonase (pectinase) family protein	-0.309836	3.55519	-3.93	0.544821	2.72284	-0.202868	3.93		At2g38080	15941540	15944694	sense	T8P21.1	laccase putative / diphenoloxidase putative	-0.889165	-0.551411	9.6152	-6.00883	-1.25365	6.16561	9.6152
At1g59990	22093904	22096667	Complement	T2K10.4	DEAD/DEAH box helicase putative(RH22)	1.28157	0.184832	-3.92959	1.98658	1.26796	-2.99054	3.92959		At5g36260	14302185	14305563	Complement	T30G6.12	aspartyl protease familyprotein	-2.01488	-1.48194	9.559	-2.65725	-3.17848	4.42984	9.559
At3g52720	19549668	19552262	Complement	F3C22.120	carbonic anhydrase familyprotein	2.06715	1.77277	-3.92658	-0.314531	3.5907	-1.47341	3.92658		At2g33270	14110758	14112281	sense	F4P9.4	thioredoxin family protein	-2.24071	-1.62594	9.55706	-2.5098	-3.51847	4.44959	9.55706
At1g26150	9039703	9043275	Complement	F28B23.17	protein kinase family protein	0.677978	0.39775	-3.9163	2.50348	0.934534	-2.80859	3.9163		At2g22560	9593243	9595918	sense	F14M13.4	kinase interactingprotein-related	-2.13753	-1.04516	9.54703	-3.13303	-2.83509	5.05566	9.54703
At4g33030	15935432	15937810	sense	F26P21.150	UDP-sulfoquinovose synthase /sulfite:UDP-glucose sulfotransferase / sulfolipidbiosynthesis protein (SQD1)	1.41991	0.397861	-3.91199	1.6793	1.58058	-2.78524	3.91199		At3g19280	6681303	6683898	Complement	MVI11.20	glycoprotein3-alpha-L-fucosyltransferase A / FucTA / corealpha-(13)-fucosyltransferase (FUT11)	-2.2205	-1.46565	9.53337	-2.92064	-3.32079	4.84055	9.53337
At4g28750	14202779	14203961	Complement	F16A16.140	photosystem I reaction centersubunit IV chloroplast putative / PSI-E putative(PSAE1)	3.6537	0.33348	-3.90405	-0.172102	3.43888	-2.89853	3.90405		At1g54280	20266433	20270960	Complement	F20D21.10	haloacid dehalogenase-likehydrolase family protein	-1.93729	-1.82359	9.53047	-2.64262	-3.41789	4.24764	9.53047
At1g12250	4159268	4161453	sense	T28K15.2	thylakoid lumenalprotein-related	2.72301	1.4351	-3.90359	-0.523807	3.81822	-1.82205	3.90359		At4g38190	17909913	17913635	Complement	F20D10.310	cellulose synthase familyprotein	-1.96495	-1.7829	9.5243	-2.83224	-3.39279	4.45427	9.5243
At1g51570	19125844	19128356	Complement	F5D21.2	C2 domain-containing protein	-0.839607	1.49506	-3.90107	3.01409	0.562788	-1.76671	3.90107		At2g01330	158282	160857	Complement	F10A8.21	transducin family protein /WD-40 repeat family protein	-2.06194	-1.77507	9.52253	-2.67715	-3.48447	4.40768	9.52253
At1g73500	27642752	27644190	Complement	T9L24.32	mitogen-activated protein kinasekinase (MAPKK) putative (MKK9)	2.47012	-0.367394	-3.89658	1.51594	1.76109	-3.64018	3.89658		At3g04690	1273392	1275944	Complement	F7O18.16	protein kinase family protein	-2.10601	-1.71676	9.50904	-2.65872	-3.47076	4.44181	9.50904
At2g33800	14307848	14309506	Complement	T1B8.10	ribosomal protein S5 familyprotein	1.76236	0.934948	-3.89532	0.863817	2.38293	-2.31126	3.89532		At5g42340	16945314	16947583	Complement	K5J14.17	armadillo/beta-catenin repeatfamily protein / U-box domain-containing protein	-2.23653	-1.76693	9.5082	-2.44356	-3.654	4.35884	9.5082
At5g58140	23541653	23550337	sense	K21L19.6	protein kinase family protein /non phototropic hypocotyl 1-like protein (NPL1)	2.79193	0.200147	-3.89286	0.599308	2.56917	-2.98729	3.89286		At5g35090	13375644	13376318	sense	F7N22.40	expressed protein	-2.25239	-1.72712	9.4955	-2.40329	-3.63863	4.35139	9.4955
At5g10860	3428892	3430471	Complement	T30N20.130	CBS domain-containing protein	0.662338	0.465713	-3.89128	2.42758	0.980822	-2.72175	3.89128		At1g22730	8046142	8049028	sense	T22J18.10	MA3 domain-containing protein	-1.73391	-1.91564	9.49477	-2.94387	-3.2961	4.30862	9.49477
At5g56260	22792551	22794437	Complement	K24C1.7	dimethylmenaquinonemethyltransferase family protein	3.19908	-0.225341	-3.88897	0.698569	2.4647	-3.45104	3.88897		At3g56930	21084474	21087293	sense	F24I3.10	zinc finger (DHHC type) familyprotein	-2.58563	-1.80041	9.49056	-1.87767	-4.07145	4.14595	9.49056
At4g34830	16602433	16606014	Complement	F11I11.70	pentatricopeptide (PPR)repeat-containing protein	3.57805	0.129048	-3.88431	0.0667375	3.15438	-3.09213	3.88431		At4g13560	7879557	7880379	Complement	T6G15.110	late embryogenesis abundantdomain-containing protein / LEA domain-containing protein	-1.39845	0.146027	9.48161	-6.37006	-1.07459	7.391	9.48161
At1g05070	1457067	1458742	Complement	T7A14.6	expressed protein	1.013	1.30165	-3.8791	1.11561	2.05383	-1.8743	3.8791		At1g21010	7346145	7346957	sense	F9H16.19	expressed protein	-1.07428	-2.71705	9.47152	-2.6831	-3.40618	3.35797	9.47152
At5g38290	15320610	15322776	sense	MXA21.6	peptidyl-tRNA hydrolase familyprotein	3.49402	0.146205	-3.87232	0.0624719	3.07242	-2.97572	3.87232		At1g02790	610448	612294	Complement	F22D16.22	exopolygalacturonase /galacturan 14-alpha-galacturonidase (PGA3) / pectinase	-0.985981	0.215979	9.4561	-7.32945	-0.660584	7.50685	9.4561
At5g48460	19653327	19656714	Complement	MJE7.9	fimbrin-like protein putative	0.570166	1.84007	-3.84238	0.982246	2.12895	-1.35347	3.84238		At1g13890	4751578	4752841	sense	F16A14.10	SNAP25 homologous proteinputative / synaptosomal-associated protein SNAP25-likeputative (SNAP30)	-1.92314	-1.65763	9.44817	-2.28036	-3.29489	3.95859	9.44817
At1g66940	24976691	24978454	Complement	F1O19.2	protein kinase-related	-0.660173	3.35075	-3.84175	0.965123	2.17755	-0.260089	3.84175		At4g14780	8492827	8494586	sense	FCAALL.308	protein kinase putative	-1.73372	-1.75514	9.44414	-2.37168	-3.20221	3.8413	9.44414
At1g73080	27488174	27491862	sense	F3N23.28	leucine-rich repeattransmembrane protein kinase putative	0.589611	-0.57629	-3.83495	3.76815	0.00646401	-3.82874	3.83495		At5g13580	4370695	4373204	sense	T6I14.7	ABC transporter family protein	-2.20253	-1.82809	9.43098	-2.49849	-3.67444	4.36526	9.43098
At3g48080	17763923	17766175	Complement	T17F15.50	lipase class 3 family protein /disease resistance protein-related	2.25353	0.628448	-3.83298	0.469924	2.55722	-2.38543	3.83298		At5g14890	4817952	4821811	sense	T9L3.1	NHL repeat-containing protein	-2.10452	-1.68577	9.39863	-2.77637	-3.42994	4.54807	9.39863
At4g10180	6346459	6349272	sense	F28M11.100	light-mediated developmentprotein 1 / deetiolated1 (DET1)	0.617546	0.867021	-3.83157	1.85027	1.30156	-2.17267	3.83157		At2g33420	14165781	14169603	sense	F4P9.19	expressed protein	-2.13794	-1.43831	9.37738	-3.0238	-3.21274	4.84986	9.37738
At5g15350	4984962	4986221	Complement	F8M21.240	plastocyanin-likedomain-containing protein	0.726271	1.25702	-3.83108	1.38014	1.75011	-1.85167	3.83108		At4g39670	18410166	18410994	sense	F23K16.2	expressed protein	-0.0547901	-3.15864	9.3729	-3.61488	-2.7607	3.12206	9.3729
At2g44640	18424319	18426472	sense	F16B22.13	expressed protein	-0.470551	0.637531	-3.79616	3.49079	0.149315	-2.45235	3.79616		At4g20460	11029747	11031583	Complement	F9F13.110	NAD-dependentepimerase/dehydratase family protein	-2.11013	-1.80363	9.34465	-2.39339	-3.58367	4.19812	9.34465
At1g02150	408622	410611	sense	T7I23.8	pentatricopeptide (PPR)repeat-containing protein	1.63013	1.02919	-3.79187	0.727518	2.36767	-2.07183	3.79187		At5g07510	2377711	2378825	Complement	T2I1.220	glycine-rich protein (GRP14)	-2.09319	-1.98092	9.34243	-2.50501	-3.71874	4.25031	9.34243
At4g32020	15487950	15489456	sense	F10N7.170	expressed protein	0.570238	1.0461	-3.78663	1.81107	1.4144	-2.08356	3.78663		At2g35210	14843141	14845228	sense	T4C15.12	human Rev interacting-likefamily protein / hRIP family protein	-2.05495	-1.16906	9.3343	-2.82284	-2.90061	4.68555	9.3343
At1g22160	7823138	7823960	sense	F2E2.23	senescence-associatedprotein-related	1.52051	0.647442	-3.78238	1.30035	1.8972	-2.50223	3.78238		At1g01310	120154	121130	sense	F6F3.11	allergen V5/Tpx-1-related familyprotein	-1.99974	-1.5087	9.3233	-2.84827	-3.17018	4.56114	9.3233
At3g11660	3678841	3679949	Complement	T19F11.6	harpin-induced family protein /HIN1 family protein / harpin-responsive family protein	0.949036	2.53143	-3.78188	0.0300389	3.11284	-0.843729	3.78188		At1g04700	1316918	1320918	sense	T1G11.5	protein kinase family protein	-2.38368	-1.8942	9.32318	-1.86653	-3.97313	3.92975	9.32318
At1g21350	7476930	7479021	Complement	F24J8.1	expressed protein	3.41288	0.632236	-3.77358	-0.42515	3.5889	-2.40757	3.77358		At4g22790	11975042	11976759	Complement	T12H17.180	MATE efflux family protein	-2.14176	-0.847565	9.31647	-3.35078	-2.64229	5.30312	9.31647
At5g62890	25260650	25264603	sense	MQB2.190	permease putative	-0.750033	2.20987	-3.76801	1.95783	1.21631	-0.999264	3.76801		At1g62450	23119623	23121035	Complement	T3P18.2	Rho GDP-dissociation inhibitorfamily protein	-1.76561	-1.60221	9.31003	-2.7952	-3.05137	4.27378	9.31003
At4g25620	13066779	13069688	Complement	M7J2.10	hydroxyproline-rich glycoproteinfamily protein	1.16873	1.66014	-3.76737	0.590102	2.5245	-1.53253	3.76737		At2g13570	5662924	5663571	Complement	T10F5.11	CCAAT-box binding transcriptionfactor putative	1.40139	-3.0074	9.30694	-5.75952	-1.2969	3.16561	9.30694
At1g50900	18869874	18870872	sense	F8A12.12	expressed protein	3.07119	0.88208	-3.76548	-0.471956	3.68125	-2.0514	3.76548		At1g53100	19790658	19792115	Complement	F8L10.4	glycosyltransferase family 14protein / core-2/I-branching enzyme family protein	-1.46257	-1.78375	9.3023	-2.58419	-2.94414	3.73269	9.3023
At5g18660	6220783	6222230	Complement	T1A4.40	isoflavone reductase-related	2.22248	0.944753	-3.76544	0.309883	2.81483	-2.1928	3.76544		At3g06790	2143494	2145782	Complement	F3E22.7	plastid developmental proteinDAG putative	-2.17368	-1.53747	9.29309	-2.60262	-3.37027	4.49749	9.29309
At4g15770	8978009	8978877	sense	FCAALL.377	60S ribosome subunitbiogenesis protein putative	1.03299	-0.332256	-3.76502	2.82962	0.595833	-3.48931	3.76502		At1g15460	5309996	5313424	Complement	T16N11.21	anion exchange family protein	-2.32001	-1.36279	9.28081	-2.64577	-3.33107	4.71475	9.28081
At3g28870	10891592	10893076	sense	MLD15.4	hypothetical protein	1.89567	0.700297	-3.76058	0.802192	2.28665	-2.3811	3.76058		At1g68290	25600334	25602101	sense	T22E19.8	bifunctional nuclease putative	-1.49063	-1.6883	9.26549	-2.62215	-2.88953	3.83047	9.26549
At1g30360	10715647	10718979	sense	T4K22.4	early-responsive to dehydrationstress protein (ERD4)	1.02441	2.79877	-3.76005	-0.308456	3.4498	-0.612283	3.76005		At4g03620	1607038	1608663	Complement	T5L23.11	myosin heavy chain-related	-2.22966	-1.72478	9.25399	-2.40329	-3.60468	4.31019	9.25399
At3g22180	7827120	7830820	sense	MKA23.9	zinc finger (DHHC type) familyprotein	2.98303	0.321634	-3.7546	0.250409	2.85867	-2.78462	3.7546		At1g73630	27688397	27689114	sense	F25P22.4	calcium-binding proteinputative	-0.0290162	-2.27082	9.2429	-4.73144	-1.98638	3.99753	9.2429
At1g19835	6855943	6860323	Complement	F6F9.12	expressed protein	-0.165829	1.90306	-3.74184	1.69157	1.49587	-1.30502	3.74184		At5g03690	963147	965049	Complement	F17C15.110	fructose-bisphosphatealdolase putative	-2.16385	-1.62564	9.22186	-2.46527	-3.45426	4.34019	9.22186
At3g52840	19592132	19597277	sense	F8J2.10	beta-galactosidase putative /lactase putative	0.104984	0.618066	-3.74072	2.75913	0.628763	-2.45044	3.74072		At5g60740	24443298	24447495	Complement	MUP24.11	ABC transporter family protein	-1.83641	-1.49505	9.19429	-2.53659	-3.02816	4.11838	9.19429
At2g40140	16779238	16781735	sense	T7M7.3	zinc finger (CCCH-type) familyprotein	1.6385	1.32488	-3.73873	0.444591	2.64827	-1.81113	3.73873		At2g31830	13539982	13544742	Complement	F20M17.13	endonuclease/exonuclease/phosphatase family protein	-2.01887	-1.7099	9.18726	-2.21398	-3.42117	3.9474	9.18726
At4g21870	11603582	11604343	Complement	T8O5.80	26.5 kDa class P-related heatshock protein (HSP26.5-P)	0.944529	0.872712	-3.73796	1.46927	1.6006	-2.14324	3.73796		At1g28550	10036952	10037684	Complement	F1K23.21	Ras-related GTP-binding proteinputative	-2.25053	-1.62931	9.17799	-2.43681	-3.53268	4.38269	9.17799
At2g32640	13853996	13857978	Complement	T26B15.22	expressed protein	3.05014	0.978753	-3.73419	-0.535906	3.7034	-2.01871	3.73419		At2g03850	1175581	1176699	sense	T18C20.5	late embryogenesis abundantdomain-containing protein / LEA domain-containing protein	-1.79069	-1.88148	9.17727	-2.12896	-3.38469	3.63258	9.17727
At4g27280	13663582	13664246	Complement	M4I22.90	calcium-binding EF hand familyprotein	0.0806244	1.17668	-3.72965	2.19077	1.09235	-1.95273	3.72965		At3g04360	1157011	1158316	Complement	T6K12.2	C2 domain-containing protein	-1.77261	-1.52893	9.17472	-2.64666	-2.99492	4.15049	9.17472
At1g32550	11771746	11774158	Complement	T9G5.4	ferredoxin family protein	3.72084	-0.300456	-3.72515	0.273361	2.77385	-3.41729	3.72515		At2g18340	7976482	7978107	sense	T30D6.15	late embryogenesis abundantdomain-containing protein / LEA domain-containing protein	-2.10841	-1.41767	9.17395	-2.40618	-3.21176	4.27976	9.17395
At3g62090	22999522	23001684	Complement	T17J13.50	basic helix-loop-helix (bHLH)protein putative	-0.507393	0.914826	-3.7229	3.06491	0.353675	-2.0501	3.7229		At3g25150	9156964	9159910	Complement	MJL12.17	nuclear transport factor 2(NTF2) family protein / RNA recognition motif(RRM)-containing protein	-1.85951	-1.17747	9.16618	-3.71612	-2.69292	5.22371	9.16618
At5g42030	16828623	16830333	Complement	MJC20.13	expressed protein	2.79399	0.858526	-3.7215	-0.216512	3.29907	-2.14269	3.7215		At1g03620	904318	906012	Complement	F21B7.23	phagocytosis and cell motilityprotein ELMO1-related	-1.64221	-1.6668	9.16036	-2.53276	-3.00498	3.87886	9.16036
At5g55280	22437882	22439838	Complement	MCO15.23	cell division protein FtsZchloroplast putative (FTSZ)	0.23524	0.940063	-3.71871	2.19393	1.02455	-2.09861	3.71871		At4g24580	12687889	12694258	Complement	F22K18.220	pleckstrin homology (PH)domain-containing protein-related / RhoGAPdomain-containing protein	-2.11406	-1.79584	9.15825	-2.11179	-3.60162	3.92914	9.15825
At4g00400	174072	176837	Complement	F5I10.4	phospholipid/glycerolacyltransferase family protein	-0.984898	2.96155	-3.71617	1.57521	1.66424	-0.501875	3.71617		At3g27410	10146481	10146879	Complement	K1G2.12	expressed protein	-2.0589	-1.76645	9.15703	-2.04662	-3.53558	3.82814	9.15703
At2g47400	19453924	19454508	sense	T8I13.24	CP12 domain-containing protein	3.25079	0.151854	-3.71507	0.177877	2.9059	-2.93324	3.71507		At2g33100	14043396	14047121	Complement	F25I18.16	cellulose synthase familyprotein	-1.82666	-1.40973	9.14745	-2.86709	-2.91561	4.41596	9.14745
At5g54770	22263821	22265558	sense	K5F14.12	thiazole biosynthetic enzymechloroplast (ARA6) (THI1) (THI4)	3.37588	-0.47242	-3.705	0.677575	2.33821	-3.59949	3.705		At5g61430	24718348	24719956	Complement	MFB13.6	no apical meristem (NAM) familyprotein	-2.13356	-1.97927	9.12671	-2.36135	-3.75628	4.13958	9.12671
At5g08280	2663191	2665793	Complement	F8L15.10	hydroxymethylbilane synthase /porphobilinogen deaminase chloroplast /pre-uroporphyrinogen synthase	0.947228	2.28119	-3.70451	0.18034	2.8879	-0.974298	3.70451		At1g25230	8840394	8842300	Complement	F4F7.38	purple acid phosphatase familyprotein	-1.83244	-0.966605	9.11674	-3.17578	-2.49573	4.84347	9.11674
At3g05120	1430483	1432784	sense	T12H1.8	expressed protein	3.20439	-0.448709	-3.69855	0.780137	2.23776	-3.56	3.69855		At3g13370	4341671	4342237	sense	MDC11.21	hypothetical protein	-1.18674	0.405543	9.11179	-7.07954	-0.665973	7.66825	9.11179
At3g63160	23344488	23345009	Complement	T20O10.3	expressed protein	2.91105	-0.208002	-3.69837	0.753999	2.23919	-3.29064	3.69837		At2g33690	14259275	14259664	sense	T1B8.27	late embryogenesis abundantprotein putative / LEA protein putative	-1.94317	-1.55841	9.10996	-3.12422	-3.14005	4.70903	9.10996
At3g56000	20794308	20796773	Complement	F27K19.180	glycosyl transferase family 2protein	1.71025	1.56499	-3.69249	0.0678731	2.97456	-1.52742	3.69249		At1g49490	18321231	18323774	Complement	F13F21.7	leucine-rich repeat familyprotein / extensin family protein	-2.03706	-1.03297	9.10825	-2.89464	-2.75167	4.77778	9.10825
At4g35550	16875640	16877228	Complement	F8D20.60	homeobox-leucine zipper protein(HB-2) / HD-ZIP protein	0.0164267	1.08574	-3.69121	2.24986	0.958466	-1.93697	3.69121		At5g53820	21870623	21871343	sense	MGN6.21	expressed protein	-1.45874	-0.419369	9.09721	-5.25082	-1.63298	6.27772	9.09721
At5g06320	1930625	1931769	Complement	MHF15.16	harpin-induced family protein /HIN1 family protein / harpin-responsive family protein /NDR1/HIN1-like protein 3	2.5357	-0.0705436	-3.68919	1.00159	2.09596	-3.14948	3.68919		At5g25400	8823286	8824335	sense	F18G18.140	phosphatetranslocator-related	-2.13984	-1.8172	9.07913	-2.3488	-3.61037	4.15357	9.07913
At1g49975	18508484	18509265	sense	F2J10.22	expressed protein	2.17858	0.260853	-3.68858	0.882917	2.10746	-2.73384	3.68858		At2g30630	13053755	13056296	Complement	T6B20.2	expressed protein	-1.95895	-1.61483	9.07185	-2.43715	-3.25504	4.1104	9.07185
At1g65445	24319477	24320415	sense	T8F5.28	transferase-related	-1.70178	3.60078	-3.68642	1.69874	1.46358	-5.67e-05	3.68642		At1g75870	28490193	28490775	sense	T4O12.11	hypothetical protein	-1.8194	-1.31834	9.06596	-3.41772	-2.79511	4.88952	9.06596
At1g21500	7529871	7531014	Complement	F24J8.11	expressed protein	2.29614	1.04862	-3.67862	0.0618348	2.99611	-2.02043	3.67862		At1g70540	26597593	26598305	sense	F24J13.11	invertase/pectin methylesteraseinhibitor family protein	-2.22692	-1.65797	9.06315	-2.58256	-3.5198	4.47418	9.06315
At3g54360	20139283	20142832	Complement	T12E18.50	expressed protein	-1.63599	2.43439	-3.66528	2.7062	0.655966	-0.851798	3.66528		At5g03620	918737	921873	sense	F17C15.40	subtilase family protein	-2.13884	-2.10278	9.0532	-2.10562	-3.90585	3.89739	9.0532
At2g42580	17735793	17738796	sense	F14N22.15	tetratricopeptide repeat(TPR)-containing protein	-1.24873	2.46646	-3.66476	2.22617	0.996602	-0.793951	3.66476		At2g36660	15368400	15371477	Complement	F13K3.6	polyadenylate-binding proteinputative / PABP putative	-2.48658	-1.70406	9.05055	-1.42039	-3.9682	3.62286	9.05055
At1g34640	12687208	12688488	Complement	F12K21.2	expressed protein	-0.623178	1.55708	-3.66417	2.50269	0.799835	-1.56362	3.66417		At2g37750	15838067	15838636	sense	T8P21.37	expressed protein	-0.813215	-2.60934	9.04546	-2.91181	-3.04239	3.30134	9.04546
At1g11750	3967478	3969854	sense	F25C20.10	ATP-dependent Clp proteaseproteolytic subunit (ClpP)	3.17766	0.654925	-3.65596	-0.325886	3.37939	-2.3635	3.65596		At4g30770	14986146	14986619	Complement	T10C21.120	hypothetical protein	-2.02677	-1.56446	9.04501	-2.55841	-3.25581	4.28602	9.04501
At4g30800	15001173	15002677	sense	T10C21.1	40S ribosomal protein S11(RPS11B)	-1.13422	1.24475	-3.65287	3.44124	0.103513	-1.81564	3.65287		At1g78460	29523280	29524208	Complement	T30F21.20	SOUL heme-binding familyprotein	0.0612775	-2.2398	9.01868	-4.70132	-1.87714	3.86784	9.01868
At5g11720	3776815	3780129	sense	T22P22.110	alpha-glucosidase 1 (AGLU1)	1.47522	1.7577	-3.63827	0.0757108	2.92657	-1.3341	3.63827		At4g07960	4802338	4805644	Complement	F1K3.3	glycosyl transferase family 2protein	-2.71815	-1.88377	8.99849	-1.71077	-4.27746	4.07429	8.99849
At5g66590	26591407	26592098	sense	K1F13.27	allergen V5/Tpx-1-related familyprotein	0.422205	1.41053	-3.63017	1.47939	1.60288	-1.65433	3.63017		At5g66740	26664956	26665784	sense	MSN2.13	hypothetical protein	-1.93716	-1.75565	8.98533	-2.76426	-3.33463	4.34434	8.98533
At3g20440	7123444	7130370	Complement	MQC12.20	glycoside hydrolase family 13protein	0.887932	1.36697	-3.62844	1.08799	1.98523	-1.72839	3.62844		At1g67290	25194684	25196900	Complement	F1N21.11	glyoxal oxidase-related	-1.95993	-1.28656	8.98386	-3.22953	-2.89892	4.87547	8.98386
At1g70100	26406746	26409760	sense	F20P5.17	expressed protein	0.175765	2.4079	-3.62446	0.720956	2.2408	-0.775556	3.62446		At2g26850	11456391	11458317	Complement	F12C20.11	F-box family protein	-1.79849	-1.45698	8.97939	-2.94065	-2.92852	4.43661	8.97939
At3g58580	21671843	21674674	Complement	F14P22.170	endonuclease/exonuclease/phosphatase family protein	-0.28252	1.37976	-3.62218	2.27503	0.948035	-1.6879	3.62218		At1g21140	7404372	7405270	sense	T22I11.3	nodulin putative	-1.17627	-2.14148	8.96508	-3.00402	-2.96997	3.76696	8.96508
At4g00490	222348	225457	sense	F6N23.1	beta-amylase putative /14-alpha-D-glucan maltohydrolase putative	3.19063	0.81629	-3.61695	-0.545277	3.60509	-2.13291	3.61695		At3g46720	17221840	17223333	Complement	T6H20.250	UDP-glucoronosyl/UDP-glucosyltransferase family protein	-2.2074	-1.54774	8.96384	-2.53102	-3.40357	4.43223	8.96384
At5g53490	21740555	21741868	Complement	MNC6.3	thylakoid lumenal 17.4 kDaprotein chloroplast	3.00895	0.744358	-3.60366	-0.305404	3.32856	-2.25338	3.60366		At2g03060	901613	903568	sense	T17M13.23	MADS-box family protein	-2.05778	-1.51086	8.95244	-2.43838	-3.23454	4.19891	8.95244
At1g62030	22927915	22930263	Complement	F8K4.22	DC1 domain-containing protein	-1.0932	2.99073	-3.60357	1.51652	1.53105	-0.353794	3.60357		At1g78980	29712816	29716159	Complement	YUP8H12R.40	leucine-rich repeattransmembrane protein kinase putative	-1.93474	-1.56024	8.9355	-2.48608	-3.17023	4.12498	8.9355
At2g40490	16919940	16922255	sense	T2P4.16	uroporphyrinogen decarboxylaseputative / UPD putative	0.831768	2.10561	-3.60008	0.292885	2.6384	-0.974196	3.60008		At1g66360	24755040	24756497	sense	T27F4.11	C2 domain-containing protein	-2.49085	-0.783953	8.90863	-2.85097	-2.90068	5.21317	8.90863
At1g23080	8180566	8183559	Complement	T26J12.14	auxin efflux carrier proteinputative	2.15959	0.626974	-3.59722	0.494239	2.45697	-2.32152	3.59722		At4g35700	16923324	16924325	sense	F8D20.210	zinc finger (C2H2 type) familyprotein	-2.04465	-1.55493	8.87251	-2.79904	-3.24074	4.50471	8.87251
At5g40160	16079714	16081558	Complement	MSN9.60	ankyrin repeat family protein(EMB506)	1.84921	1.1844	-3.59051	0.207833	2.73673	-1.77532	3.59051		At2g47770	19575534	19576577	sense	F17A22.16	benzodiazepinereceptor-related	-1.51091	-1.85435	8.86458	-3.04516	-3.01834	4.16094	8.86458
At1g28440	9996810	10000433	sense	F3M18.12	leucine-rich repeattransmembrane protein kinase putative	-0.593487	0.895972	-3.58077	3.14106	0.265638	-2.0914	3.58077		At3g25130	9152411	9153878	sense	MJL12.7	expressed protein	-1.77358	-1.86673	8.86381	-1.88186	-3.38009	3.38461	8.86381
At3g21170	7419982	7421166	sense	MXL8.1	F-box family protein	-0.879772	3.44992	-3.56772	0.896827	2.03277	-0.015901	3.56772		At3g53690	19909794	19911043	Complement	F4P12.390	zinc finger (C3HC4-type RINGfinger) family protein	-0.168585	-2.67468	8.85987	-3.29083	-2.45998	2.96033	8.85987
At1g51940	19299598	19302787	Complement	T14L22.13	protein kinase family protein /peptidoglycan-binding LysM domain-containing protein	0.0447406	2.52354	-3.56721	0.719262	2.20796	-0.659797	3.56721		At4g02650	1156453	1158653	sense	T10P11.8	epsin N-terminal homology (ENTH)domain-containing protein / clathrin assemblyprotein-related	-1.39653	-1.00298	8.85485	-2.5814	-2.16694	3.86578	8.85485
At3g50650	18817239	18819191	Complement	T3A5.30	scarecrow-like transcriptionfactor 7 (SCL7)	2.76588	0.717625	-3.56387	-0.0918458	3.07321	-2.26839	3.56387		At3g05820	1732997	1735632	Complement	F10A16.11	beta-fructofuranosidaseputative / invertase putative / saccharase putative /beta-fructosidase putative	-2.10789	-1.78435	8.85434	-2.06744	-3.58791	3.88235	8.85434
At4g37610	17670475	17672334	Complement	F19F18.100	TAZ zinc finger family protein/ BTB/POZ domain-containing protein	-0.337814	2.78956	-3.5617	0.872288	2.04995	-0.458205	3.5617		At1g18990	6558669	6560480	Complement	F14D16.14	expressed protein	-2.01226	-1.57851	8.84825	-2.64929	-3.24588	4.34284	8.84825
At3g58590	21677059	21679464	sense	F14P22.180	pentatricopeptide (PPR)repeat-containing protein	2.41741	0.772244	-3.55933	0.131514	2.82604	-2.18833	3.55933		At1g12600	4286412	4288860	Complement	T12C24.13	hypothetical protein	-2.17789	-1.41811	8.83543	-2.25743	-3.27413	4.17625	8.83543
At3g18030	6167690	6168954	Complement	MBG14.4	halotolerance protein (HAL3A)	0.269413	2.72952	-3.5543	0.312439	2.61064	-0.502672	3.5543		At1g19780	6833876	6836396	Complement	F6F9.17	cyclic nucleotide-regulated ionchannel putative (CNGC8)	-2.07981	-1.65923	8.83176	-2.2999	-3.40848	4.07201	8.83176
At4g02790	1247399	1249588	sense	T5J8.11	GTP-binding family protein	1.63836	0.358571	-3.54719	1.27734	1.73419	-2.59473	3.54719		At2g27180	11627311	11628252	sense	T22O13.5	expressed protein	-1.92466	-1.44298	8.83114	-3.16289	-3.01001	4.7281	8.83114
At5g10560	3336256	3339367	Complement	F12B17.90	glycosyl hydrolase family 3protein	-1.11531	1.33031	-3.54663	3.20872	0.191455	-1.65911	3.54663		At3g50940	18944744	18946592	sense	F18B3.220	AAA-type ATPase family protein	-0.0471982	-2.88733	8.83016	-3.01697	-2.5118	2.60507	8.83016
At3g23770	8565501	8567500	sense	MYM9.12	glycosyl hydrolase family 17protein	0.0653136	1.75853	-3.54029	1.47317	1.58131	-1.32714	3.54029		At3g05150	1440086	1443527	sense	T12H1.11	sugar transporter familyprotein	-1.72801	-1.41147	8.82352	-2.35588	-2.86565	3.86982	8.82352
At2g46400	19050487	19051899	Complement	F11C10.9	WRKY family transcriptionfactor	3.35699	-0.0848446	-3.53891	0.201316	2.75823	-3.04887	3.53891		At3g12130	3864158	3866596	Complement	T21B14.5	KH domain-containing protein /zinc finger (CCCH type) family protein	-2.29654	-1.52095	8.80578	-2.47325	-3.45434	4.44899	8.80578
At1g06950	2130154	2135664	Complement	F4H5.1	chloroplast inner envelopeprotein-related	0.233013	1.38205	-3.53842	1.5913	1.4087	-1.57866	3.53842		At5g66170	26464874	26465953	sense	K2A18.25	senescence-associated familyprotein	-2.24409	-1.65939	8.78093	-2.23795	-3.56185	4.16648	8.78093
At1g66330	24733292	24736125	Complement	T27F4.8	senescence-associated familyprotein	2.02732	1.34532	-3.53415	-0.112416	3.0558	-1.63071	3.53415		At3g07810	2492279	2495756	sense	F17A17.15	heterogeneous nuclearribonucleoprotein putative / hnRNP putative	-2.10445	-1.57949	8.76493	-2.61764	-3.32631	4.3878	8.76493
At3g01500	194740	197981	Complement	F4P13.5	carbonic anhydrase 1 chloroplast/ carbonate dehydratase 1 (CA1)	9.40252	0.457909	-8.20918	-0.917285	8.04894	-5.69708	0		At3g28100	10457372	10462202	sense	MMG15.28	nodulin MtN21 family protein	-2.0405	-1.71492	8.75902	-2.45707	-3.40667	4.16001	8.75902
At5g59320	23946197	23946965	sense	MNC17.10	lipid transfer protein 3 (LTP3)	5.557	-3.43827	-7.13989	4.53223	1.30436	-16.3026	0		At1g19500	6754943	6755527	Complement	F18O14.44	hypothetical protein	-1.28635	-1.66998	8.7572	-3.27293	-2.63989	4.16599	8.7572
At2g38530	16135456	16136232	sense	T6A23.27	nonspecific lipid transferprotein 2 (LTP2)	-1.01535	0.48088	-6.99817	8.15027	-0.45425	-4.89796	0		At3g11700	3698845	3701499	sense	T19F11.10	beta-Ig-H3 domain-containingprotein / fasciclin domain-containing protein	-1.86769	-1.85923	8.75648	-2.14656	-3.41865	3.70552	8.75648
At4g14690	8418278	8419258	sense	FCAALL.232	chlorophyll A-B binding familyprotein / early light-induced protein putative	7.19918	2.14468	-6.47081	-2.56673	10.5808	-2.75908	0		At1g70790	26704077	26706002	sense	F15H11.4	C2 domain-containing protein	-0.298373	-3.38713	8.75113	-2.60691	-3.19727	2.51499	8.75113
At3g46750	17230929	17232446	sense	T6H20.220	hypothetical protein	6.34503	0.274013	-6.17109	-0.400504	5.49227	-4.56077	0		At2g07180	2980896	2983448	Complement	T25N22.14	protein kinase putative	-1.26315	-2.68564	8.7469	-2.23301	-3.581	3.13514	8.7469
At2g21330	9135232	9137293	Complement	F3K23.9	fructose-bisphosphate aldolaseputative	6.86675	-0.407386	-6.16753	0.0920036	4.7341	-5.51172	0		At4g22960	12030132	12032707	sense	F7H19.140	hypothetical protein	-1.74343	-1.56515	8.73925	-2.15459	-3.04161	3.66518	8.73925
At3g54010	20011867	20016161	sense	F5K20.310	peptidyl-prolyl cis-transisomerase putative / FK506-binding protein putative /pasticcino 1-D (PAS1-D)	7.96919	0.314852	-6.00197	-1.24744	6.72395	-4.43064	0		At1g04540	1237255	1239060	sense	T1G11.21	C2 domain-containing protein	-2.12434	-1.29643	8.73287	-2.94721	-3.05958	4.75429	8.73287
At4g16980	9556997	9557831	sense	FCAALL.162	arabinogalactan-proteinfamily	2.14159	3.97951	-5.94002	-0.866945	6.00973	-1.05935	0		At3g03080	698537	700308	Complement	T17B22.23	NADP-dependent oxidoreductaseputative	-1.75352	-1.68665	8.72685	-2.57528	-3.12169	4.02206	8.72685
At1g75500	28341453	28343821	Complement	F1B16.19	nodulin MtN21 family protein	-0.691298	-0.046514	-5.92917	7.40676	-0.636365	-4.82213	0		At4g25150	12901631	12903135	Complement	F13M23.290	acid phosphatase putative	-2.87194	-1.96598	8.71548	-1.19053	-4.59306	3.68215	8.71548
At3g63110	23329051	23330515	Complement	T20O10.210	adenylateisopentenyltransferase 3 / cytokinin synthase (IPT3)	8.18605	-0.817863	-5.89461	-0.237273	5.0687	-5.92173	0		At2g33460	14181666	14182914	Complement	F4P9.23	p21-rho-binding domain-containingprotein	-1.8831	-1.70863	8.70043	-2.70663	-3.2394	4.23394	8.70043
At5g64410	25768071	25772277	Complement	MSJ1.25	oligopeptide transporter OPTfamily protein	5.47041	1.78017	-5.80616	-1.64477	7.38126	-2.67168	0		At1g15470	5315502	5317858	sense	T16N11.22	transducin family protein /WD-40 repeat family protein	-2.09161	-1.23475	8.68461	-2.64221	-2.98886	4.47144	8.68461
At1g76080	28552680	28554313	Complement	T23E18.2	thioredoxin family protein	6.70901	-0.565311	-5.77849	0.0156408	4.68739	-5.44394	0		At1g79640	29971806	29975983	Complement	F20B17.7	protein kinase family protein	-1.17651	-2.05863	8.66966	-2.23803	-2.94445	3.1071	8.66966
At1g09340	3015388	3018236	sense	T31J12.6	expressed protein	6.52462	-0.0650817	-5.75263	-0.358173	5.12266	-4.7256	0		At3g57470	21280238	21286904	Complement	T8H10.70	peptidase M16 family protein /insulinase family protein	-2.32731	-1.58659	8.66516	-2.04955	-3.5939	4.0929	8.66516
At5g38980	15624001	15624579	sense	K15E6.160	expressed protein	8.00623	-1.66556	-5.74611	0.633658	3.84884	-7.37777	0		At4g18640	10259695	10263775	sense	F28A21.50	leucine-rich repeattransmembrane protein kinase putative	-2.36079	-0.705811	8.66116	-2.90263	-2.7042	5.12541	8.66116
At1g20020	6942796	6945006	sense	T20H2.20	ferredoxin--NADP(+) reductaseputative / adrenodoxin reductase putative	6.06755	-0.155046	-5.69442	-0.0731579	4.68341	-4.79688	0		At1g79400	29869885	29872733	sense	T8K14.18	cation/proton exchangerputative (CHX2)	-2.19066	-1.57218	8.6475	-2.50792	-3.40125	4.36335	8.6475
At5g59310	23942311	23943078	Complement	MNC17.4	lipid transfer protein 4 (LTP4)	8.08345	-3.62174	-5.69399	2.20439	2.39263	-11.4486	0		At3g18520	6361182	6365621	sense	MYF24.24	histone deacetylase familyprotein	-1.98634	-1.72705	8.64358	-2.40682	-3.37365	4.0637	8.64358
At1g42970	16129874	16132283	sense	F13A11.3	glyceraldehyde-3-phosphatedehydrogenase B chloroplast (GAPB) / NADP-dependentglyceraldehydephosphate dehydrogenase subunit B	7.31265	0.0692178	-5.62614	-0.947587	5.87336	-4.47772	0		At3g13050	4176518	4179073	sense	MGH6.18	transporter-related	-1.50102	-1.68148	8.63808	-2.93432	-2.85916	4.08103	8.63808
At4g19430	10598456	10599155	Complement	T5K18.210	expressed protein	2.73261	3.71802	-5.59938	-1.38343	6.52323	-1.08307	0		At3g55020	20399846	20405888	Complement	T15C9.20	RabGAP/TBC domain-containingprotein	-1.51795	-1.45805	8.63206	-2.65236	-2.68114	3.87521	8.63206
At5g43270	17377529	17380963	Complement	MNL12.9	squamosa promoter-bindingprotein-like 2 (SPL2)	2.84126	-1.42533	-5.59097	3.61064	1.11062	-6.69764	0		At3g01240	78383	79044	Complement	T4P13.7	expressed protein	-1.49919	-0.729931	8.62819	-4.45617	-1.9518	5.54438	8.62819
At5g17170	5649205	5651160	sense	MKP11.2	rubredoxin family protein	6.38108	-0.315789	-5.5263	-0.141896	4.63098	-4.87612	0		At4g27110	13599242	13601527	Complement	T24A18.60	phytochelatinsynthetase-related	-2.01874	-1.63467	8.623	-2.57152	-3.30041	4.24856	8.623
At1g19770	6832341	6833693	sense	F6F9.18	purine permease-related	3.12035	-0.990672	-5.51309	2.76719	1.70656	-5.85344	0		At1g72960	27450275	27454523	sense	F3N23.16	root hair defective 3GTP-binding (RHD3) family protein	-1.86901	-1.79087	8.62011	-2.27973	-3.34037	3.83436	8.62011
At4g03210	1415949	1417327	sense	F4C21.14	xyloglucan:xyloglucosyltransferase putative / xyloglucan endotransglycosylaseputative / endo-xyloglucan transferase putative	-1.56791	0.228534	-5.50101	8.01834	-1.14418	-4.22949	0		At2g14490	6172081	6173068	Complement	T13P21.13	pseudogene ARFGTPase-activating domain-containing proteinsimilar to zinc finger and C2 domain protein GI:9957238from [Arabidopsis thaliana]	-1.84894	-1.19857	8.61685	-1.67932	-2.82164	3.36918	8.61685
At1g03130	753307	754198	Complement	F10O3.4	photosystem I reaction centersubunit II chloroplast putative / photosystem I 20 kDasubunit putative / PSI-D putative (PSAD2)	5.77414	2.01454	-5.47126	-2.26365	8.11255	-2.33022	0		At1g76240	28607707	28608822	Complement	T23E18.17	expressed protein	-1.12671	-2.17478	8.61581	-3.0878	-2.94365	3.77911	8.61581
At2g41100	17145162	17146688	sense	T3K9.13	touch-responsive protein /calmodulin-related protein 3 touch-induced (TCH3)	7.26279	-1.23514	-5.43181	0.249919	4.13161	-6.14416	0		At3g19900	6922574	6925029	Complement	MPN9.15	expressed protein	-0.884783	-3.35564	8.60199	-1.88105	-3.80799	2.44156	8.60199
At5g16030	5238186	5240750	sense	F1N13.170	expressed protein	4.10253	-1.35415	-5.4277	2.19147	2.03537	-6.5494	0		At4g20780	11133197	11133981	Complement	F21C20.130	calcium-binding proteinputative	-1.33951	-2.0381	8.5944	-2.94405	-3.02559	3.87442	8.5944
At5g51720	21026822	21027571	sense	MIO24.14	expressed protein	7.19344	-0.885777	-5.40916	-0.033981	4.44015	-5.6188	0		At4g37840	17790141	17792192	Complement	T28I19.120	hexokinase putative	-1.77803	-1.67839	8.57221	-2.11621	-3.17469	3.62739	8.57221
At5g51110	20795360	20796660	Complement	MWD22.5	expressed protein	5.70418	0.396332	-5.39829	-0.586948	5.16848	-3.81005	0		At1g49290	18236276	18237292	Complement	F13F21.27	expressed protein	-1.62891	-1.66505	8.54966	-3.06208	-2.94722	4.30077	8.54966
At5g09660	2993446	2995676	Complement	F17I14.150	malate dehydrogenaseglyoxysomal	8.86836	-1.43039	-5.34132	-0.167861	4.56831	-6.40711	0		At1g47270	17328996	17331168	sense	F8G22.1	F-box family protein / tubbyfamily protein	-2.43962	-1.29527	8.53493	-2.22822	-3.37609	4.38224	8.53493
At5g01750	289762	291323	sense	T20L15.20	expressed protein	5.61006	-2.6962	-5.33829	2.48375	1.93054	-8.5347	0		At5g03600	912806	914225	sense	F17C15.20	GDSL-motif lipase/hydrolasefamily protein	-1.99996	-1.68015	8.52157	-2.36195	-3.34253	4.0367	8.52157
At1g29670	10375753	10378144	sense	F15D2.22	GDSL-motif lipase/hydrolasefamily protein	7.23098	-3.46171	-5.3211	2.29605	2.01374	-11.3328	0		At5g45840	18611307	18614448	Complement	K15I22.4	leucine-rich repeattransmembrane protein kinase putative	-1.06811	-1.99456	8.52139	-2.72122	-2.74726	3.41969	8.52139
At1g68010	25497016	25499651	sense	T23K23.14	glycerate dehydrogenase /NADH-dependent hydroxypyruvate reductase	8.49893	-1.03166	-5.29412	-0.383478	4.79546	-5.7504	0		At3g03800	969321	971467	sense	F20H23.28	syntaxin putative (SYP131)	-1.88457	-1.25439	8.5189	-2.2855	-2.85766	3.97941	8.5189
At3g50780	18886380	18888505	Complement	F18B3.60	expressed protein	7.39049	-0.0344535	-5.25834	-1.01849	5.68847	-4.31239	0		At5g14670	4729322	4730498	sense	T15N1.160	ADP-ribosylation factorputative	-2.06339	-1.48248	8.51626	-2.51518	-3.20686	4.2778	8.51626
At3g15353	5180674	5181407	Complement	K7L4.17	metallothionein proteinputative	5.93111	0.923214	-5.20791	-1.37397	6.21934	-3.17812	0		At1g58210	21557286	21561721	sense	T18I24.12	kinase interacting familyprotein	-1.76262	-1.79569	8.50425	-2.5311	-3.21714	3.94119	8.50425
At1g54040	20174383	20177617	Complement	F15I1.12	kelch repeat-containing protein	8.08799	-1.44267	-5.20387	-0.0639952	4.34241	-6.20262	0		At1g18520	6374925	6376309	sense	F15H18.1	senescence-associated familyprotein	-1.95555	-1.4854	8.49902	-2.08686	-3.14816	3.78496	8.49902
At1g71500	26939700	26941269	sense	F26A9.12	Rieske [2Fe-2S]domain-containing protein	5.68101	-0.194575	-5.03466	-0.219057	4.37418	-4.34824	0		At4g35650	16908524	16910195	sense	F8D20.160	isocitrate dehydrogenaseputative / NAD+ isocitrate dehydrogenase putative	-2.05588	-1.78437	8.49615	-2.27039	-3.4931	3.98181	8.49615
At5g35735	13917982	13920227	Complement	MXH1.11	auxin-responsive family protein	7.18875	-3.01316	-5.02714	1.69858	2.37775	-9.11577	0		At2g22860	9744693	9745378	sense	T20K9.7	phytosulfokines 2 (PSK2)	-1.01976	-1.71389	8.47934	-3.70397	-2.41712	4.23159	8.47934
At1g19150	6612740	6613963	sense	T29M8.2	chlorophyll A-B binding proteinputative / LHCI type II putative	8.46281	-1.04841	-5.01092	-0.516569	4.74503	-5.51221	0		At1g06990	2148386	2150149	sense	F10K1.29	GDSL-motif lipase/hydrolasefamily protein	-1.80472	-1.83248	8.45975	-2.08275	-3.33295	3.57943	8.45975
At3g47040	17335216	17338090	Complement	F13I12.90	glycosyl hydrolase family 3protein	6.77795	-0.0680483	-4.97923	-0.960849	5.30932	-4.1647	0		At3g18780	6474877	6477210	sense	MVE11.16	actin 2 (ACT2)	-1.784	-1.40442	8.45131	-2.51888	-2.87907	4.02279	8.45131
At5g65730	26316263	26317704	sense	MPA24.8	xyloglucan:xyloglucosyltransferase putative / xyloglucan endotransglycosylaseputative / endo-xyloglucan transferase putative	7.9748	-4.3661	-4.96576	2.3984	1.7731	-12.3419	0		At1g67540	25315159	25315857	Complement	F12B7.9	expressed protein	-2.12255	-1.6214	8.44526	-2.35544	-3.39253	4.14246	8.44526
At5g45680	18548107	18549508	sense	MRA19.7	FK506-binding protein 1 (FKBP13)	5.53425	0.231721	-4.96105	-0.570909	4.78254	-3.71491	0		At4g26470	13371078	13372351	sense	M3E9.100	calcium-binding EF hand familyprotein	-1.50561	-1.8855	8.44348	-2.59397	-3.06092	3.74372	8.44348
At1g19670	6803602	6804965	Complement	F14P1.11	coronatine-responsive protein /coronatine-induced protein 1 (CORI1)	1.5501	-1.49288	-4.94212	4.80532	0.0350504	-6.11088	0		At1g51260	19007044	19009309	Complement	F11M15.12	acyl-CoA:1-acylglycerol-3-phosphate acyltransferaseputative	-2.03504	-1.48769	8.43931	-2.37511	-3.19449	4.11817	8.43931
At3g56370	20910078	20913960	Complement	T5P19.20	leucine-rich repeattransmembrane protein kinase putative	5.18447	-0.780155	-4.94004	0.60183	3.36054	-5.05346	0		At5g40155	16079119	16079965	sense	MSN9.6	expressed protein	-1.91943	-1.38804	8.41848	-2.46407	-2.98917	4.10626	8.41848
At1g65230	24232813	24234565	sense	T23K8.14	expressed protein	6.95689	-0.60623	-4.89459	-0.481585	4.59126	-4.76611	0		At1g11250	3768724	3769706	sense	T28P6.10	syntaxin putative (SYP125)	-2.15548	-1.66158	8.40476	-2.21414	-3.47456	4.04299	8.40476
At2g34810	14692335	14694141	sense	F19I3.4	FAD-binding domain-containingprotein	2.49805	-1.63344	-4.87404	3.7206	0.677414	-6.21915	0		At3g15480	5226255	5227794	Complement	MJK13.14	expressed protein	0.402551	-2.86059	8.39205	-3.96652	-2.07666	2.93166	8.39205
At3g23660	8513464	8517790	Complement	MDB19.16	transport protein putative	4.97699	0.933765	-4.85834	-1.04413	5.44942	-2.83765	0		At1g26610	9193337	9195267	sense	T1K7.2	zinc finger (C2H2 type) familyprotein	-1.80413	-2.0878	8.38817	-1.90342	-3.58659	3.38439	8.38817
At3g18050	6180865	6182860	sense	MRC8.3	expressed protein	2.87298	-1.03518	-4.83214	2.44871	1.43709	-5.46484	0		At2g02970	865069	868288	Complement	T17M13.14	nucleoside phosphatase familyprotein / GDA1/CD39 family protein	-2.05799	-1.2282	8.37038	-2.40008	-2.96393	4.20993	8.37038
At2g02100	528349	529107	sense	F5O4.13	plant defensin-fusion proteinputative (PDF2.2)	-1.81974	0.348357	-4.82964	7.36104	-1.24904	-3.59905	0		At5g46770	18994635	18995387	sense	MZA15.19	expressed protein	-2.02627	-1.58969	8.3457	-2.49234	-3.26689	4.18362	8.3457
At4g22890	12006997	12009529	sense	F7H19.70	expressed protein	4.98658	-0.489073	-4.81296	0.358041	3.49635	-4.55586	0		At1g01070	38753	40944	Complement	T25K16.7	nodulin MtN21 family protein	-1.49905	-1.90117	8.34372	-2.21202	-3.1014	3.40169	8.34372
At5g62730	25214720	25217259	sense	MQB2.30	proton-dependent oligopeptidetransport (POT) family protein	9.86232	0.807003	-4.81033	-3.47737	9.18298	-3.13437	0		At5g11110	3537085	3541005	sense	T5K6.100	sucrose-phosphate synthaseputative	-0.310564	-2.33214	8.33601	-3.06127	-2.30667	2.91436	8.33601
At5g43750	17597193	17598449	Complement	MQD19.9	expressed protein	6.06732	-0.106373	-4.79399	-0.656376	4.73866	-4.05008	0		At3g59470	21989938	21991521	Complement	F25L23.1	far-red impaired responsivefamily protein / FAR1 family protein	-2.64169	-0.85648	8.33128	-2.68437	-3.09699	5.07976	8.33128
At2g34860	14715447	14717276	sense	F19I3.9	chaperone protein dnaJ-related	4.99489	0.423137	-4.78017	-0.598344	4.6499	-3.42081	0		At3g03900	1002982	1004278	Complement	F20H23.5	adenylylsulfate kinaseputative	-2.21955	-1.64766	8.31537	-2.11254	-3.52561	4.00573	8.31537
At5g51970	21128671	21130629	sense	MSG15.7	sorbitol dehydrogenase putative/ L-iditol 2-dehydrogenase putative	5.26488	-0.457502	-4.777	0.150153	3.68387	-4.46846	0		At3g52420	19440753	19440947	sense	F22O6.200	outer envelope membraneprotein putative	-1.76999	-1.65229	8.29424	-2.672	-3.07828	4.08315	8.29424
At1g55850	20880365	20883146	sense	F14J16.9	cellulose synthase familyprotein	8.44918	-1.51968	-4.76504	-0.340077	4.32428	-5.91672	0		At2g30080	12845807	12847189	Complement	F23F1.17	metal transporter putative(ZIP6)	-2.15863	-0.920057	8.28919	-2.88914	-2.73444	4.82216	8.28919
At1g42550	15979855	15982392	sense	T8D8.2	expressed protein	3.10035	2.08209	-4.72941	-0.868541	4.95338	-1.80839	0		At1g78160	29412793	29415077	sense	T11I11.10	pumilio/Puf RNA-bindingdomain-containing protein	-2.02305	-1.74879	8.2822	-2.13583	-3.44009	3.83022	8.2822
At4g33790	16204159	16207947	Complement	T16L1.280	acyl CoA reductase putative	4.43933	-3.56782	-4.71534	3.79086	0.50564	-12.4467	0		At5g65090	26021422	26024077	sense	F15O5.1	endonuclease/exonuclease/phosphatase family protein	-2.01145	-1.48854	8.27491	-1.99252	-3.20591	3.73976	8.27491
At3g48360	17919177	17921509	Complement	T29H11.120	speckle-type POZprotein-related	7.29433	-0.447784	-4.68908	-0.743084	4.82025	-4.4035	0		At1g78000	29334629	29338040	sense	F28K19.22	sulfate transporter (Sultr1	-0.809917	-2.25843	8.27465	-2.78008	-2.72824	3.18706	8.27465
At1g14890	5137048	5137926	sense	F10B6.30	invertase/pectin methylesteraseinhibitor family protein	0.372454	-0.843988	-4.68261	5.37714	-0.410837	-4.89486	0		At2g17890	7776967	7779709	Complement	T13L16.9	calcium-dependent protein kinasefamily protein / CDPK family protein	-1.84518	-1.24471	8.27154	-2.11379	-2.81928	3.76559	8.27154
At2g31880	13561973	13564054	sense	F20M17.8	leucine-rich repeattransmembrane protein kinase putative	9.24242	-1.5458	-4.66962	-0.743555	4.73115	-5.79951	0		At2g19110	8285965	8293527	sense	T20K24.12	ATPase E1-E2 type familyprotein / haloacid dehalogenase-like hydrolase familyprotein / heavy-metal-associated domain-containingprotein	-2.21252	-0.659777	8.26032	-3.40829	-2.51779	5.36751	8.26032
At4g19170	10481797	10483868	sense	T18B16.140	9-cis-epoxycarotenoiddioxygenase putative / neoxanthin cleavage enzymeputative / carotenoid cleavage dioxygenase putative	5.66918	3.22749	-4.66167	-4.1132	10.926	-0.911491	0		At3g24670	9006212	9008808	Complement	MSD24.10	pectate lyase family protein	-2.02471	-1.48028	8.25206	-2.14114	-3.19681	3.89378	8.25206
At1g32080	11537328	11539780	Complement	T12O21.2	membrane protein putative	6.71324	0.0357192	-4.63955	-1.1777	5.35085	-3.76067	0		At4g13450	7814956	7815900	Complement	T9E8.190	universal stress protein (USP)family protein	-1.92598	-1.37473	8.22082	-2.45148	-2.97947	4.09296	8.22082
At5g16710	5483291	5485069	sense	F5E19.50	dehydroascorbate reductaseputative	4.69169	0.561727	-4.63	-0.642258	4.59593	-3.09784	0		At1g68090	25523105	25524437	Complement	T23K23.6	annexin 5 (ANN5)	-2.01994	-1.38582	8.21982	-2.00829	-3.11793	3.79039	8.21982
At2g29630	12674111	12677388	sense	T27A16.27	thiamine biosynthesis familyprotein / thiC family protein	6.33015	-0.962487	-4.62408	-0.0596694	3.86466	-4.99815	0		At4g33390	16075285	16077709	sense	F17M5.150	hypothetical protein	-2.33931	-1.266	8.2086	-2.24598	-3.25395	4.3019	8.2086
At5g21100	7168186	7170930	sense	T10F18.130	L-ascorbate oxidase putative	2.41467	2.62986	-4.59884	-0.854227	4.82791	-1.28558	0		At4g18920	10368766	10370223	sense	F13C5.90	expressed protein	-2.17001	-1.40396	8.2077	-2.47447	-3.21598	4.31688	8.2077
At1g33590	12177757	12179393	sense	T1E4.3	disease resistance protein-related/ LRR protein-related	4.71829	-1.76307	-4.59747	1.65377	2.12547	-6.1427	0		At4g01575	681868	682583	Complement	T15B16.19	serine protease inhibitorKazal-type family protein	-2.62311	-1.45096	8.20724	-1.6859	-3.74521	4.00064	8.20724
At5g62360	25057882	25058687	sense	MMI9.1	invertase/pectin methylesteraseinhibitor family protein	4.65007	-0.859891	-4.58697	0.786832	2.97282	-4.81329	0		At5g57200	23194922	23197827	sense	MUL3.15	epsin N-terminal homology (ENTH)domain-containing protein / clathrin assemblyprotein-related	-2.07293	-1.623	8.20307	-2.15572	-3.35905	3.90141	8.20307
At1g74730	28082592	28084009	sense	F25A4.30	expressed protein	5.12895	0.388585	-4.58083	-0.793527	4.71847	-3.35581	0		At4g34750	16577571	16578357	sense	T4L20.330	auxin-responsive proteinputative / small auxin up RNA (SAUR_E)	-2.52619	-1.20275	8.19121	-2.31093	-3.34862	4.53284	8.19121
At4g32260	15573643	15574743	Complement	F10M6.100	ATP synthase family	4.90508	0.202076	-4.57813	-0.45315	4.30186	-3.54409	0		At3g22700	8024805	8025821	Complement	MWI23.7	F-box family protein	-1.88367	-1.51709	8.18161	-2.53051	-3.06848	4.09565	8.18161
At1g62750	23237099	23240112	Complement	F23N19.11	elongation factor Tu familyprotein	5.49172	-0.259191	-4.56724	-0.351198	4.16889	-4.06394	0		At5g45880	18626891	18628393	Complement	K15I22.8	pollen Ole e 1 allergen andextensin family protein	-2.25296	-0.848731	8.17359	-3.19228	-2.73449	5.14553	8.17359
At5g04140	1129853	1138443	sense	F21E1.60	glutamate synthase (GLU1) /ferredoxin-dependent glutamate synthase (Fd-GOGAT 1)	8.69805	-0.98743	-4.56032	-0.912538	4.9061	-5.01983	0		At3g01020	5146	5900	sense	T4P13.30	iron-sulfur cluster assemblycomplex protein putative	-1.92361	-1.53036	8.16129	-2.4308	-3.11952	4.03224	8.16129
At1g08980	2884428	2886623	sense	F7G19.15	amidase family protein	3.38585	-1.08836	-4.55145	1.94667	1.80645	-5.12019	0		At1g68875	25895749	25896461	sense	T6L1.13	expressed protein	-1.48634	-2.13144	8.14197	-2.413	-3.26583	3.5249	8.14197
At4g09650	6100740	6101705	sense	T25P22.90	ATP synthase delta chainchloroplast putative / H(+)-transporting two-sectorATPase delta (OSCP) subunit putative	4.79888	1.07897	-4.54276	-1.30319	5.3484	-2.63469	0		At1g16760	5734227	5737300	sense	F17F16.3	protein kinase family protein	-2.09839	-1.44743	8.08134	-2.22082	-3.21167	4.01403	8.08134
At1g20850	7252173	7253716	sense	F9H16.17	cysteine endopeptidasepapain-type (XCP2)	2.38026	5.17862	-4.54076	-2.90459	8.81485	0.391097	0		At5g41780	16740303	16742061	sense	K16L22.6	myosin heavy chain-related	-1.72784	-1.46309	8.07049	-2.17184	-2.90795	3.64348	8.07049
At1g64860	24101616	24104615	sense	F13O11.16	RNA polymerase sigma subunitSigA (sigA) / sigma factor 1 (SIG1)	5.78933	-0.631507	-4.53969	-0.0204152	3.69877	-4.54228	0		At5g10500	3305332	3308110	sense	F12B17.150	kinase interacting familyprotein	-2.03249	-1.57691	8.06844	-2.1662	-3.2786	3.88125	8.06844
At5g51010	20761792	20762929	sense	K3K7.19	rubredoxin family protein	4.92225	0.635428	-4.53745	-0.919622	4.88412	-3.02312	0		At5g23270	7838937	7841024	sense	MKD15.13	sugar transporter putative	-1.63381	-1.20854	8.06568	-3.14282	-2.52683	4.43241	8.06568
At5g63410	25412211	25415379	Complement	K9H21.13	leucine-rich repeattransmembrane protein kinase putative	-1.44808	5.72921	-4.52541	0.661729	2.96919	0.661898	0		At1g60240	22218866	22219695	Complement	T13D8.13	apical meristem formationprotein-related	-1.8799	-1.65018	8.06432	-2.26503	-3.19752	3.81162	8.06432
At5g23120	7778124	7780631	sense	MYJ24.11	photosystem IIstability/assembly factor chloroplast (HCF136)	6.2784	-0.241636	-4.51987	-0.762245	4.65665	-3.99645	0		At2g17730	7710938	7712832	sense	T17A5.9	zinc finger (C3HC4-type RINGfinger) family protein	-1.55383	-1.58243	8.05318	-2.26269	-2.85254	3.53893	8.05318
At5g05690	1702689	1706781	Complement	MJJ3.9	cytochrome P450 90A1 (CYP90A1)(CYP90) (CPD)	2.88091	2.10468	-4.51898	-0.910401	4.88087	-1.57756	0		At2g37980	15901135	15904688	Complement	T8P21.11	expressed protein	-2.18452	-1.22674	8.05266	-2.41953	-3.06138	4.30679	8.05266
At3g26710	9814763	9815987	sense	MLJ15.10	expressed protein	4.3144	-1.84582	-4.50714	1.96236	1.78536	-6.19482	0		At3g11650	3676152	3677043	Complement	T19F11.5	harpin-induced family protein /HIN1 family protein / harpin-responsive family protein /NDR1/HIN1-like protein 2	-1.6766	-3.23531	8.05076	-1.00097	-4.61241	2.36294	8.05076
At1g23310	8268405	8271888	Complement	F26F24.16	glutamate:glyoxylateaminotransferase 1 (GGT1)	6.30917	-0.812985	-4.50529	-0.16383	3.88043	-4.74558	0		At5g54780	22265999	22269089	Complement	MBG8.4	RabGAP/TBC domain-containingprotein	-1.32853	-1.62532	8.05049	-2.78597	-2.64754	3.76144	8.05049
At3g12750	4051658	4053187	Complement	MBK21.8	zinc transporter (ZIP1)	4.67561	0.818507	-4.47777	-0.987893	4.93611	-2.77273	0		At1g23520	8343560	8344664	Complement	F5O8.8	expressed protein	-2.0387	-1.52955	8.03715	-2.09757	-3.24448	3.82934	8.03715
At5g45280	18362822	18366922	sense	K9E15.6	pectinacetylesterase putative	3.27758	1.53895	-4.47117	-0.719881	4.56308	-2.05212	0		At1g21670	7610387	7612671	sense	F8K7.9	expressed protein	-0.95665	-1.89852	8.03612	-3.11506	-2.53389	3.63678	8.03612
At4g38690	18074469	18075759	Complement	F20M13.250	1-phosphatidylinositolphosphodiesterase-related	5.29109	0.698181	-4.45115	-1.26137	5.2966	-2.86936	0		At1g59740	21971736	21976076	sense	F23H11.6	proton-dependent oligopeptidetransport (POT) family protein	-1.65583	-2.58118	8.03089	-1.40008	-3.93789	2.73211	8.03089
At3g26680	9802451	9805519	sense	MLJ15.7	DNA cross-link repairprotein-related	4.89392	-0.153602	-4.44033	-0.160284	3.82146	-3.81745	0		At2g39890	16662757	16665409	sense	T28M21.5	proline transporter 1 (ProT1)	-0.531569	-2.65444	8.02634	-2.77329	-2.8008	2.89008	8.02634
At3g19580	6803172	6804239	Complement	MMB12.27	zinc finger (C2H2 type) protein2 (AZF2)	3.55858	2.80005	-4.42977	-2.14121	6.55873	-1.04795	0		At5g15190	4932823	4933580	Complement	F8M21.80	expressed protein	-2.06512	-1.80857	8.02076	-2.06359	-3.52654	3.77637	8.02076
At1g21550	7553090	7553865	Complement	F24J8.15	calcium-binding proteinputative	2.8345	-0.674613	-4.41924	1.92079	1.77458	-4.44088	0		At2g15340	6684369	6684901	sense	F26H6.14	glycine-rich protein	-2.15492	-1.25132	7.99335	-2.47426	-3.06018	4.33662	7.99335
At5g38520	15438804	15440661	sense	MBB18.5	hydrolase alpha/beta fold familyprotein	4.95126	0.0295985	-4.41677	-0.389021	4.08009	-3.57251	0		At1g32250	11639823	11640323	sense	F5D14.1	calmodulin putative	-1.8944	-1.79857	7.98685	-2.2238	-3.34783	3.76486	7.98685
At5g42270	16919714	16923100	sense	K5J14.13	FtsH protease putative	7.48243	0.168351	-4.41096	-1.73916	6.04589	-3.43357	0		At1g54070	20186307	20186910	sense	F15I1.15	dormancy/auxin associatedprotein-related	-1.84766	-1.29129	7.96659	-2.80165	-2.80699	4.32759	7.96659
At2g04039	1333268	1334563	sense	F3L12.11	expressed protein	8.79112	-0.584613	-4.40996	-1.33537	5.39684	-4.34721	0		At1g09790	3168484	3170821	Complement	F21M12.17	phytochelatinsynthetase-related	-1.58789	-2.02775	7.96365	-2.08871	-3.28798	3.33353	7.96365
At4g36530	17239961	17241940	Complement	AP22.96	hydrolase alpha/beta fold familyprotein	6.29352	0.905886	-4.4066	-2.10668	6.50348	-2.6786	0		At3g02440	500811	502236	Complement	F16B3.7	expressed protein	-1.95048	-1.61097	7.95992	-2.18619	-3.23171	3.81308	7.95992
At3g27650	10239783	10241848	sense	MGF10.6	LOB domain protein 25 / lateralorgan boundaries domain protein 25 (LBD25)	4.89724	1.92888	-4.40652	-2.33924	6.78982	-1.76427	0		At5g40040	16047141	16047485	Complement	MYH19.9	60S acidic ribosomal protein P2(RPP2E)	-2.2874	-2.16791	7.94508	-1.42738	-4.14509	3.35229	7.94508
At4g16442	9271887	9273111	Complement	FCAALL.228	integral membrane familyprotein	0.0272987	4.76212	-4.37719	-0.317686	3.9534	0.250847	0		At1g61290	22608853	22609881	sense	T1F9.22	syntaxin putative (SYP124)	-2.15257	-1.43339	7.92556	-2.18295	-3.24526	4.02245	7.92556
At2g46820	19250661	19252205	sense	F19D11.10	expressed protein	5.12904	0.0645758	-4.37068	-0.569773	4.28912	-3.53374	0		At4g16640	9367270	9368797	Complement	FCAALL.425	matrix metalloproteinaseputative	-1.92651	-1.60686	7.92188	-2.2326	-3.19791	3.82488	7.92188
At3g55170	20463891	20465316	Complement	T26I12.50	60S ribosomal protein L35(RPL35C)	4.46503	0.420128	-4.35105	-0.541566	4.20873	-3.11206	0		At1g51410	19063553	19065092	sense	F5D21.12	cinnamyl-alcohol dehydrogenaseputative (CAD)	-1.78018	-1.94829	7.91808	-2.15717	-3.38745	3.58516	7.91808
At4g04640	2350496	2352016	Complement	T19J18.4	ATP synthase gamma chain 1chloroplast (ATPC1)	4.22093	0.763949	-4.34992	-0.707803	4.42113	-2.80039	0		At5g05850	1762415	1764679	Complement	MJJ3.27	leucine-rich repeat familyprotein	-2.12917	-1.81545	7.91194	-1.83397	-3.61154	3.61824	7.91194
At1g26770	9259592	9261300	sense	T24P13.15	expansin putative (EXP10)	4.82388	0.62061	-4.34258	-0.988251	4.76837	-2.93202	0		At5g12180	3937025	3939597	sense	MXC9.14	calcium-dependent protein kinaseputative / CDPK putative	-1.74882	-1.36475	7.9069	-2.25812	-2.82458	3.75322	7.9069
At1g31580	11311154	11311970	sense	F27M3.20	expressed protein	9.76313	-2.59913	-4.33091	0.0594776	3.52885	-7.28637	0		At3g10420	3239185	3242542	sense	F13M14.30	sporulation protein-related	-2.04766	-1.34818	7.90559	-2.3226	-3.06092	4.06725	7.90559
At5g02120	419088	419770	sense	T7H20.170	thylakoid membrane one helixprotein (OHP)	4.67291	0.223234	-4.33019	-0.483602	4.13712	-3.3214	0		At1g65240	24234530	24237012	Complement	T23K8.15	aspartyl protease familyprotein	-2.12861	-2.03541	7.89637	-1.2453	-3.93053	3.05543	7.89637
At1g72030	27114527	27115868	sense	F28P5.8	GCN5-related N-acetyltransferase(GNAT) family protein	4.84986	0.605209	-4.32318	-0.986918	4.7817	-2.88076	0		At2g20430	8815748	8816835	Complement	F11A3.2	p21-rho-binding domain-containingprotein	-1.84403	-1.39211	7.88067	-2.33425	-2.92625	3.89639	7.88067
At5g53580	21782305	21784210	Complement	MNC6.12	aldo/keto reductase familyprotein	5.95468	-0.850455	-4.32286	-0.117446	3.67373	-4.59751	0		At3g26830	9889190	9890942	sense	MDJ14.12	cytochrome P450 71B15 putative(CYP71B15)	-1.79797	-1.62862	7.8803	-1.95085	-3.14358	3.47321	7.8803
At1g27370	9505188	9508468	Complement	F17L21.15	squamosa promoter-bindingprotein-like 10 (SPL10)	1.72372	-1.06162	-4.2982	3.34805	0.534662	-4.9274	0		At1g23670	8373275	8375857	Complement	F5O8.22	expressed protein	-1.94963	-1.86752	7.8749	-1.95543	-3.48675	3.56518	7.8749
At3g23340	8350810	8353966	sense	MLM24.21	casein kinase putative	7.01252	-0.549737	-4.29607	-0.737592	4.46881	-4.21565	0		At1g63930	23731590	23732837	sense	T12P18.5	expressed protein	-1.9079	-1.55354	7.87232	-2.45531	-3.11414	4.01132	7.87232
At1g19960	6928074	6928268	sense	T20H2.25	expressed protein	3.75094	-1.28399	-4.29199	1.63926	1.84044	-5.26794	0		At3g48420	17940632	17942686	sense	T29H11.1	haloacid dehalogenase-likehydrolase family protein	-1.70439	-1.47271	7.86797	-2.34194	-2.87455	3.75575	7.86797
At1g11260	3777329	3780337	sense	T28P6.9	glucose transporter (STP1)	4.67441	-1.37686	-4.28905	1.08795	2.41867	-5.29303	0		At3g08010	2555988	2557511	sense	F17A17.35	expressed protein	-1.34881	-1.75875	7.84546	-2.13754	-2.83389	3.20511	7.84546
At1g11860	4001294	4003441	sense	F12F1.30	aminomethyltransferaseputative	5.6756	-0.258065	-4.27109	-0.605253	4.2279	-3.80816	0		At5g20230	6826508	6827601	sense	F5O24.120	plastocyanin-likedomain-containing protein	0.328546	-5.28583	7.8454	-1.54498	-4.00311	1.03941	7.8454
At1g13270	4544953	4547308	sense	T6J4.3	metallopeptidase M24 familyprotein	3.01706	-0.645585	-4.2667	1.57203	1.92701	-4.28529	0		At2g47340	19439238	19440086	sense	T8I13.18	invertase/pectin methylesteraseinhibitor family protein	-2.02005	-1.49356	7.8403	-2.34778	-3.16522	4.02662	7.8403
At1g70370	26516385	26518851	Complement	F17O7.9	BURP domain-containing protein /polygalacturonase putative	-1.03845	0.971772	-4.2582	4.29344	-0.0502055	-2.51676	0		At4g12410	7342953	7343587	Complement	T4C9.250	auxin-responsive family protein	-1.95303	-1.4969	7.83744	-2.18902	-3.13207	3.84591	7.83744
At1g53090	19787020	19790565	sense	F8L10.5	WD-40 repeat family protein /phytochrome A-related	2.51862	2.01526	-4.25135	-0.755417	4.44631	-1.42492	0		At4g38230	17928671	17931176	Complement	F20D10.350	calcium-dependent proteinkinase putative / CDPK putative	-2.17323	-1.27085	7.8358	-2.26579	-3.10119	4.14164	7.8358
At4g10300	6384458	6386185	sense	F24G24.100	expressed protein	4.71817	-0.359491	-4.24809	0.0211885	3.47604	-3.92242	0		At5g10740	3393570	3396177	Complement	MAJ23.3	protein phosphatase 2C-related /PP2C-related	-1.71376	-1.52666	7.83553	-2.5464	-2.91233	3.92012	7.83553
At2g03550	1077033	1078080	sense	T4M8.1	expressed protein	4.757	-0.999952	-4.23846	0.627271	2.81368	-4.72678	0		At2g38500	16124505	16126177	Complement	T6A23.30	expressed protein	-1.77555	-1.44024	7.82585	-2.29141	-2.9112	3.78117	7.82585
At4g24000	12462040	12465634	sense	T32A16.170	cellulose synthase familyprotein	5.3257	-1.58831	-4.22574	0.911129	2.48019	-5.73549	0		At5g01180	61016	63847	Complement	F7J8.160	proton-dependent oligopeptidetransport (POT) family protein	-2.31588	-2.35734	7.82583	-1.00169	-4.42397	2.9531	7.82583
At1g69690	26219887	26221514	sense	T6C23.11	TCP family transcription factorputative	-1.67552	0.709415	-4.22526	5.75162	-0.801802	-2.69964	0		At5g10650	3365009	3368128	Complement	MAJ23.10	zinc finger (C3HC4-type RINGfinger) family protein	-0.659462	-2.45548	7.81668	-2.75803	-2.75069	3.00591	7.81668
At1g23740	8398115	8399717	Complement	F5O8.29	oxidoreductase zinc-bindingdehydrogenase family protein	4.85772	0.148388	-4.22209	-0.57915	4.17252	-3.30443	0		At3g28930	10960944	10961991	Complement	K5K13.3	avrRpt2-induced AIG2 protein(AIG2)	-1.34523	-1.86845	7.8154	-2.35956	-2.89546	3.35554	7.8154
At3g24350	8837653	8839589	sense	K7M2.13	syntaxin putative (SYP32)	4.63667	-0.234623	-4.21471	-0.0400636	3.47684	-3.72467	0		At3g44180	15911782	15912703	sense	F26G5.130	syntaxin-related familyprotein	-2.03022	-1.38313	7.81481	-2.18625	-3.08207	3.90769	7.81481
At2g36885	15489083	15490790	Complement	T1J8.4	expressed protein	3.53945	1.17789	-4.211	-0.74161	4.37796	-2.21489	0		At2g19500	8451286	8454437	Complement	F3P11.10	FAD-binding domain-containingprotein / cytokinin oxidase family protein	-1.53999	-1.54576	7.79386	-2.07629	-2.80766	3.33854	7.79386
At4g28080	13948609	13957424	Complement	T13J8.190	expressed protein	5.33657	0.0470132	-4.20589	-0.780681	4.396	-3.40385	0		At1g75920	28509252	28510684	sense	T4O12.14	family II extracellular lipase 5(EXL5)	-1.86359	-1.72181	7.7783	-2.03629	-3.2677	3.57982	7.7783
At5g19220	6463826	6466832	Complement	T24G5.120	glucose-1-phosphateadenylyltransferase large subunit 1 (APL1) / ADP-glucosepyrophosphorylase (ADG2)	5.35093	-0.182689	-4.20391	-0.432862	3.98014	-3.64802	0		At5g26940	9480597	9482772	sense	F2P16.200	exonuclease family protein	-2.7929	-0.983718	7.76097	-1.98118	-3.37726	4.48157	7.76097
At5g19940	6739626	6740984	sense	F28I16.90	plastid-lipid associatedprotein PAP-related / fibrillin-related	3.35541	1.65269	-4.19199	-1.12098	5.04427	-1.67535	0		At5g13150	4172972	4174933	Complement	T19L5.110	exocyst subunit EXO70 familyprotein	-1.87747	-1.51092	7.7404	-2.45523	-3.04697	3.98832	7.7404
At4g39710	18427033	18428353	Complement	F23K16.13	immunophilin putative /FKBP-type peptidyl-prolyl cis-trans isomerase putative	4.85295	-1.28167	-4.18443	0.81569	2.58529	-5.08615	0		At3g29020	11009851	11010650	Complement	K5K13.6	myb family transcription factor(MYB110)	-1.70222	-1.39595	7.73288	-2.1156	-2.81781	3.56277	7.73288
At4g32570	15716039	15718864	Complement	L23H3.2	expressed protein	0.856374	-0.853419	-4.17645	4.12068	-0.00481649	-4.5019	0		At1g44120	16783050	16789854	sense	T7O23.25	C2 domain-containing protein /armadillo/beta-catenin repeat family protein	-2.14634	-1.49909	7.71905	-2.1415	-3.29433	3.9479	7.71905
At2g36380	15264662	15270766	sense	F2H17.1	ABC transporter family protein	1.64127	2.95128	-4.16674	-0.776347	4.3746	-0.720145	0		At4g13790	7999710	8000218	Complement	F18A5.180	auxin-responsive proteinputative	-0.49557	-0.741931	7.71778	-5.14368	-1.07777	4.87668	7.71778
At4g28660	14149922	14151103	sense	T5F17.110	photosystem II reaction centreW (PsbW) family protein	3.99267	1.21176	-4.15183	-1.13708	4.82048	-2.1909	0		At3g55160	20456389	20463377	Complement	T26I12.40	expressed protein	-1.9046	-1.51447	7.69575	-2.33247	-3.07902	3.89546	7.69575
At1g69120	25985999	25989919	Complement	F4N2.9	floral homeotic protein APETALA1(AP1) / agamous-like MADS box protein (AGL7)	4.52773	3.53733	-4.13225	-3.93551	12.3039	-0.327526	0		At1g61860	22866524	22868284	Complement	F8K4.7	protein kinase putative	-2.01025	-1.37884	7.69493	-2.39566	-3.04575	4.07737	7.69493
At2g36145	15175620	15176585	sense	F9C22.7	expressed protein	8.92742	-0.106675	-4.12165	-2.14304	6.31722	-3.5267	0		At1g01780	282919	284082	sense	T1N6.19	LIM domain-containing protein	-1.21246	-1.45181	7.69362	-2.64576	-2.39311	3.5559	7.69362
At1g16880	5773657	5776301	sense	F6I1.12	uridylyltransferase-related	5.23434	0.715308	-4.11456	-1.41988	5.3176	-2.59486	0		At1g52580	19591306	19592721	sense	F6D8.20	rhomboid family protein	-1.86051	-1.49121	7.68632	-2.3538	-3.02262	3.89093	7.68632
At5g62790	25231351	25234665	Complement	MQB2.90	1-deoxy-D-xylulose 5-phosphatereductoisomerase (DXR)	4.1888	0.303344	-4.11319	-0.389098	3.82615	-2.98515	0		At1g19640	6788876	6791837	Complement	F14P1.3	S-adenosyl-L-methionine:jasmonicacid carboxyl methyltransferase (JMT)	-0.746641	-2.39279	7.68604	-2.68249	-2.78002	3.02669	7.68604
At2g44210	18287699	18289952	sense	F4I1.2	expressed protein	5.35976	-1.14269	-4.11284	0.350911	2.99284	-4.82622	0		At3g24560	8963767	8966968	sense	MOB24.14	expressed protein	-1.94953	-1.33217	7.6827	-2.27533	-2.95632	3.92299	7.6827
At3g25660	9340678	9343441	Complement	T5M7.15	glutamyl-tRNA(Gln)amidotransferase putative	5.68062	0.0193385	-4.10919	-1.02082	4.63513	-3.38699	0		At5g14870	4808094	4810900	Complement	T9L3.170	cyclic nucleotide-regulated ionchannel putative (CNGC18)	-1.93312	-1.57968	7.67972	-2.0513	-3.19403	3.67218	7.67972
At5g48790	19797086	19799266	Complement	K24G6.12	expressed protein	4.40628	0.165882	-4.09745	-0.392093	3.82194	-3.14919	0		At3g61540	22784361	22786802	sense	F2A19.140	peptidase family protein	-2.49641	-1.35643	7.66803	-1.74677	-3.50278	3.91718	7.66803
At5g57930	23471830	23473719	sense	MTI20.19	expressed protein	4.35693	-0.448004	-4.09596	0.232049	3.12098	-3.89012	0		At4g39610	18393564	18394739	Complement	F23K16.240	expressed protein	-1.89166	-1.53067	7.66768	-2.31782	-3.08262	3.86646	7.66768
At4g15545	8875918	8877755	sense	FCAALL.167	expressed protein	5.03637	0.450427	-4.08592	-1.12781	4.71732	-2.89416	0		At2g38240	16018360	16021831	Complement	F16M14.17	oxidoreductase 2OG-Fe(II)oxygenase family protein	-1.953	-0.449896	7.65499	-3.61686	-2.09135	5.29054	7.65499
At2g26530	11289853	11291307	Complement	T9J22.20	expressed protein	5.42421	1.19219	-4.08299	-2.02722	6.47567	-2.08989	0		At2g36190	15181809	15184949	Complement	F2H17.20	beta-fructosidase putative /beta-fructofuranosidase putative	-1.75981	-1.44143	7.65374	-2.41498	-2.88527	3.86656	7.65374
At3g16480	5599824	5602956	sense	MDC8.11	mitochondrial processingpeptidase alpha subunit putative	5.02749	-0.910586	-4.06928	0.25452	3.09188	-4.45455	0		At3g52590	19516614	19517910	sense	F22O6.30	ubiquitin extension protein 1(UBQ1) / 60S ribosomal protein L40 (RPL40B)	-1.83833	-1.38919	7.65187	-2.59243	-2.89243	4.09416	7.65187
At3g63130	23335596	23337888	sense	T20O10.230	RAN GTPase activating protein1 (RanGAP1)	6.3039	-1.06607	-4.06627	-0.382609	3.80423	-4.61094	0		At2g04675	1637481	1638644	Complement	F28I8.4	expressed protein	-1.9787	-1.341	7.64863	-2.50304	-2.97468	4.14594	7.64863
At2g13360	5546326	5548396	Complement	F14O4.7	serine-glyoxylateaminotransferase-related	6.528	-0.577564	-4.05455	-0.815862	4.34275	-4.04624	0		At3g60300	22296306	22298454	sense	F27H5.90	RWD domain-containing protein	-2.01268	-1.48399	7.64338	-1.9709	-3.18208	3.68399	7.64338
At3g44230	15943121	15943735	sense	T10D17.20	hypothetical protein	3.28189	-0.694383	-4.03091	1.25708	2.10186	-4.13636	0		At4g08290	5238903	5241027	sense	T12G13.130	nodulin MtN21 family protein	0.481619	-2.88994	7.62736	-3.6621	-2.02356	2.61635	7.62736
At1g56190	21032030	21034314	sense	F14G9.19	phosphoglycerate kinaseputative	6.22924	-0.0936636	-4.02051	-1.22792	4.82443	-3.42905	0		At1g50610	18745803	18748393	sense	F11F12.7	leucine-rich repeattransmembrane protein kinase putative	-1.79481	-1.27673	7.62284	-2.55776	-2.74941	4.03616	7.62284
At2g17120	7466129	7468388	sense	F6P23.25	peptidoglycan-binding LysMdomain-containing protein	4.2865	-1.36956	-4.01417	1.15064	2.13242	-5.05428	0		At2g33870	14344442	14345330	Complement	T1B8.16	Ras-related GTP-binding proteinputative	-1.98685	-1.50623	7.6226	-2.10051	-3.1636	3.76673	7.6226
At3g56620	20983482	20985585	Complement	T5P19.270	integral membrane familyprotein / nodulin MtN21-related	4.3073	0.253307	-4.014	-0.491775	3.86967	-3.02196	0		At2g30240	12906984	12909856	Complement	T27E13.2	cation/hydrogen exchangerputative (CHX13)	-1.83777	-1.61988	7.62242	-2.22306	-3.12212	3.71752	7.62242
At3g62380	23094584	23095827	Complement	T12C14.80	hypothetical protein	14.5927	-2.02265	-4.01256	-2.08141	5.76971	-5.71032	0		At2g48150	19695032	19696243	Complement	F11L15.5	glutathione peroxidaseputative	-1.75827	-1.47124	7.6036	-2.06489	-2.94096	3.55212	7.6036
At4g10060	6288850	6295398	sense	T5L19.190	expressed protein	4.79548	1.91249	-4.00446	-2.57806	6.65819	-1.5066	0		At3g57360	21236549	21237662	sense	F28O9.210	expressed protein	-2.69204	-1.75058	7.60266	-1.21026	-4.14029	3.52964	7.60266
At3g56680	21002259	21004646	sense	T8M16.10	expressed protein	3.81119	-0.819811	-3.98922	0.913942	2.31772	-4.28891	0		At1g17540	6029671	6032634	Complement	F1L3.25	protein kinase-related	-1.74163	-1.57218	7.60217	-2.26905	-2.99135	3.68142	7.60217
At3g27240	10057026	10059953	Complement	K17E12.6	cytochrome c1 putative	-0.41791	0.0792884	-3.97317	4.40035	-0.290608	-3.18275	0		At1g52240	19459435	19461535	Complement	F9I5.12	expressed protein	-1.9384	-1.47167	7.57389	-2.27331	-3.07314	3.87965	7.57389
At1g60590	22317835	22320635	Complement	F8A5.12	polygalacturonase putative /pectinase putative	2.28582	3.59994	-3.9695	-2.06105	6.08523	-0.170609	0		At2g16990	7390161	7394979	sense	F6P23.2	expressed protein	-0.835574	-1.62639	7.56474	-2.97308	-2.18449	3.41116	7.56474
At4g23180	12138148	12140932	sense	F21P8.70	receptor-like protein kinase 4putative (RLK4)	8.31327	-1.84428	-3.9637	-0.352759	3.67921	-5.64405	0		At4g33150	15985201	15991541	Complement	F4I10.80	lysine-ketoglutaratereductase/saccharopine dehydrogenase bifunctional enzyme	1.34665	-2.82237	7.56288	-4.78735	-1.19003	2.55201	7.56288
At5g44020	17729638	17731563	sense	MRH10.13	acid phosphatase class B familyprotein	5.81453	-3.8333	-3.9621	2.36842	1.12261	-8.97914	0		At5g60010	24177682	24181631	sense	MMN10.18	ferric reductase-liketransmembrane component family protein	-1.90943	-1.41617	7.56029	-2.10119	-3.01229	3.71468	7.56029
At1g14280	4877622	4879144	sense	F14L17.4	phytochrome kinase putative	2.72406	3.88025	-3.95967	-2.7237	6.84541	0.00324514	0		At5g08250	2653581	2655727	Complement	T22D6.190	cytochrome P450 family protein	-1.69843	-1.62285	7.55188	-2.17001	-3.00487	3.54332	7.55188
At1g75690	28425771	28426880	Complement	F10A5.12	chaperone protein dnaJ-related	4.23889	0.269087	-3.95764	-0.471524	3.83227	-2.94418	0		At5g12000	3874229	3876781	Complement	F14F18.170	protein kinase family protein	-1.83628	-1.32101	7.5507	-2.53763	-2.8289	4.05066	7.5507
At1g51110	18939016	18941327	sense	F23H24.16	plastid-lipid associatedprotein PAP / fibrillin family protein	5.82471	-0.398668	-3.95522	-1.04451	4.38438	-3.71483	0		At4g15093	8618370	8619643	sense	FCAALL.63	catalytic LigB subunit ofaromatic ring-opening dioxygenase family	-1.84952	-1.50378	7.54142	-1.98818	-3.04921	3.54116	7.54142
At1g35420	13026292	13027645	sense	F12A4.4	dienelactone hydrolase familyprotein	5.04352	-0.372565	-3.95516	-0.319911	3.60923	-3.67997	0		At5g01690	257407	260342	sense	F7A7.210	cation/hydrogen exchangerputative (CHX27)	-1.83529	-1.75678	7.54126	-2.13038	-3.24902	3.61078	7.54126
At4g37800	17775468	17777391	Complement	T28I19.80	xyloglucan:xyloglucosyltransferase putative / xyloglucan endotransglycosylaseputative / endo-xyloglucan transferase putative	1.53237	5.24071	-3.93792	-2.53	6.71661	0.793904	0		At1g04500	1221432	1224365	Complement	F19P19.3	zinc finger CONSTANS-related	-1.80314	-1.43138	7.53912	-2.28004	-2.91437	3.76613	7.53912
At3g14190	4710490	4711976	sense	MAG2.18	expressed protein	8.81657	-4.9498	-3.93216	1.65877	1.72838	-10.6307	0		At5g55490	22496048	22498129	Complement	MTE17.20	expressed protein	-1.64807	-1.45498	7.53776	-2.01575	-2.82712	3.40087	7.53776
At1g29980	10503262	10506101	Complement	T1P2.9	expressed protein	-2.79597	1.26676	-3.93204	6.03593	-1.22001	-2.02887	0		At5g53190	21589643	21591510	Complement	MFH8.13	nodulin MtN3 family protein	-2.33422	-2.38397	7.52889	-0.769767	-4.53578	2.74908	7.52889
At1g08520	2696415	2700961	sense	T27G7.20	magnesium-chelatase subunitchlD chloroplast putative / Mg-protoporphyrin IXchelatase putative (CHLD)	2.42506	1.81762	-3.9314	-0.618328	3.95292	-1.49685	0		At2g15880	6925121	6927401	Complement	F19G14.12	leucine-rich repeat familyprotein / extensin family protein	-1.47013	-1.37886	7.52314	-2.67581	-2.5481	3.81393	7.52314
At1g72180	27166482	27171092	sense	T9N14.3	leucine-rich repeat transmembraneprotein kinase putative	5.47689	0.0577932	-3.91623	-1.11724	4.54406	-3.19022	0		At3g62010	22975652	22982754	sense	F21F14.180	expressed protein	-2.48215	0.110728	7.51332	-3.21684	-2.00643	5.86893	7.51332
At4g21750	11556071	11560739	sense	F17L22.210	L1 specific homeobox gene(ML1) / ovule-specific homeobox protein A20	-1.95152	1.82459	-3.91517	3.99687	-0.0878465	-1.51101	0		At2g38905	16251177	16251562	Complement	T7F6.31	hydrophobic protein putative /low temperature and salt responsive protein putative	-2.08097	-0.266242	7.50526	-3.4672	-2.03274	5.39688	7.50526
At1g14345	4899141	4899974	sense	F14L17.34	expressed protein	4.32885	0.278969	-3.90744	-0.618397	3.93249	-2.95684	0		At4g30490	14899041	14902150	Complement	F17I23.170	AFG1-like ATPase familyprotein	0.606752	-3.68251	7.4974	-2.64822	-2.4841	1.68218	7.4974
At4g12960	7583269	7584627	sense	F25G13.50	gamma interferon responsivelysosomal thiol reductase family protein / GILT familyprotein	-1.11588	-2.69814	-3.89507	13.7798	-3.42782	-6.65688	0		At4g11350	6901709	6904155	sense	F8L21.140	fringe-related protein	-1.01117	-1.29788	7.49282	-3.19553	-2.04336	3.80357	7.49282
At5g60690	24414249	24419779	sense	MUP24.16	homeodomain-leucine zipperprotein Revoluta (REV) / fascicular fiberless 1 (IFL1)	-0.950346	-0.788555	-3.89136	6.9751	-1.5225	-4.13382	0		At1g04600	1262122	1272375	sense	T1G11.15	myosin putative	-1.92413	-1.54497	7.48603	-1.91681	-3.15981	3.53624	7.48603
At4g29410	14468250	14470173	Complement	F17A13.230	60S ribosomal protein L28(RPL28C)	-1.10379	0.768095	-3.89075	4.32769	-0.274622	-2.35171	0		At1g62990	23341030	23344353	sense	F16P17.16	homeodomain transcriptionfactor (KNAT7)	-1.7654	-0.958911	7.47713	-2.80702	-2.41774	4.29317	7.47713
At1g57770	21398861	21401945	sense	T8L23.23	amine oxidase family	6.23531	-0.40817	-3.88809	-1.08618	4.46464	-3.67633	0		At1g64300	23866758	23869708	sense	F15H21.13	protein kinase family protein	-2.13665	-1.51621	7.47389	-1.82886	-3.33087	3.65157	7.47389
At1g18650	6418852	6420521	Complement	F25I16.1	glycosyl hydrolase familyprotein 17	-1.83563	0.601597	-3.88594	5.74555	-1.03061	-2.59362	0		At4g36880	17374459	17376220	Complement	AP22.67	cysteine proteinase putative	-4.15336	-0.909644	7.4725	-0.930052	-4.53704	4.55768	7.4725
At5g15310	4974747	4976230	sense	F8M21.200	myb family transcriptionfactor	1.03145	6.36504	-3.88231	-2.78364	6.81395	1.42877	0		At3g46380	17070203	17070881	Complement	F18L15.100	hypothetical protein	-2.21388	-1.25857	7.46247	-2.00362	-3.13446	3.9169	7.46247
At2g21280	9117394	9119776	Complement	F3K23.4	expressed protein	4.39611	0.404554	-3.87865	-0.784754	4.13686	-2.76519	0		At4g10260	6371482	6372766	Complement	F24G24.60	pfkB-type carbohydrate kinasefamily protein	-1.91583	-1.67777	7.44629	-1.89461	-3.27595	3.48879	7.44629
At2g05790	2199389	2201480	sense	T17C22.2	glycosyl hydrolase family 17protein	-1.80697	1.13448	-3.87417	4.69388	-0.551219	-2.1245	0		At4g34440	16465832	16468960	sense	F10M10.3	protein kinase family protein	-1.76141	-1.57486	7.44567	-2.36791	-2.99678	3.77149	7.44567
At2g39470	16483378	16485319	sense	F12L6.13	photosystem II reaction centerPsbP family protein	6.60569	-0.591208	-3.87222	-1.0561	4.43886	-3.88566	0		At2g03200	966448	967915	Complement	T18E12.13	aspartyl protease familyprotein	-1.27874	-1.62808	7.43943	-2.60369	-2.59826	3.51742	7.43943
[truncated: 739 more rows]

## Sheet: CAR
Genes down-regulated in CARpels (all: 344, highest absolute D stat: 102)														Genes up-regulated in CARpels (all: 502, highest absolute D stat: 456)
[truncated: 503 more rows]

[truncated: 2 more sheets: SEP+PET, PET+STA]
