# Supplementary material for: Within and between Whorls: Comparative Transcriptional Profiling of Aquilegia and Arabidopsis
Source: PLoS One. 2010 Mar 23;5(3):e9735. doi: 10.1371/journal.pone.0009735 (PMC2843724; doi:10.1371/journal.pone.0009735)
Supplement: Table S4 — Differentially expressed genes in stage 15 A. thaliana floral whorls. (1.65 MB XLS) [file pone.0009735.s005.xls]

## Sheet: SEP
Genes down-regulated in SEPals (all: 385, highest absolute D stat: 223)														Genes up-regulated in SEPals (all: 695, highest absolute D stat: 560)
gene	bpstart	bpend	strand	synonym	annotation	SEP	PET	STA	CAR	SEP+PET	PET+STA	d stat test		gene	bpstart	bpend	strand	synonym	annotation	SEP	PET	STA	CAR	SEP+PET	PET+STA	d stat test
At5g25460	8863393	8865680	sense	F18G18.200	expressed protein	-12.8716	4.18147	2.95717	0.690019	-3.19822	7.38792	12.8716		At2g43570	18083301	18084539	Complement	T1O24.39	chitinase putative	15.183	-2.22992	-3.01512	-2.59469	5.35579	-4.97855	15.183
At2g34870	14717856	14718532	sense	F19I3.10	hydroxyproline-rich glycoproteinfamily protein	-10.6123	3.19378	3.01133	0.885529	-3.45153	6.19621	10.6123		At2g14610	6248786	6249545	Complement	T6B13.15	pathogenesis-related protein 1(PR-1)	14.2314	-2.19354	-2.57915	-3.00058	5.31107	-4.45937	14.2314
At3g18820	6484107	6486252	sense	MVE11.21	Ras-related GTP-binding proteinputative	-9.71944	1.70547	2.61397	1.84221	-4.16835	4.05996	9.71944		At3g57230	21188689	21191911	sense	F28O9.80	MADS-box protein (AGL16)	14.1749	-1.84943	-3.31585	-3.0017	6.12231	-4.79736	14.1749
At1g64390	23914782	23918892	sense	F15H21.9	endo-14-beta-glucanaseputative / cellulase putative	-9.59115	3.06287	1.07185	2.08799	-2.8073	3.78388	9.59115		At4g25100	12884167	12886770	Complement	F13M23.240	superoxide dismutase [Fe]chloroplast (SODB) / iron superoxide dismutase (FSD1)	13.9603	-3.17079	-2.82402	-0.680998	3.10893	-6.46292	13.9603
At3g12580	3991268	3993798	Complement	T2E22.11	heat shock protein 70 putative/ HSP70 putative	-9.04384	2.38984	2.45687	1.66278	-3.7251	4.55628	9.04384		At1g75040	28181364	28182601	sense	F9E10.11	pathogenesis-related protein 5(PR-5)	13.2569	-3.6081	-3.94662	-0.519522	3.88475	-7.99372	13.2569
At4g02290	1002446	1005202	Complement	T2H3.5	glycosyl hydrolase family 9protein	-8.95429	-0.725646	4.21806	3.30912	-8.31806	2.79322	8.95429		At2g14560	6221054	6222983	sense	T13P21.6	expressed protein	12.9161	-1.46876	-2.43102	-3.438	5.72147	-3.55641	12.9161
At2g14900	6411259	6412412	sense	T26I20.6	gibberellin-regulated familyprotein	-8.81741	2.03944	3.37201	1.15321	-4.05996	5.13103	8.81741		At4g23600	12310629	12313222	sense	F9D16.70	coronatine-responsive tyrosineaminotransferase / tyrosine transaminase	12.4473	-2.76413	-3.67413	-0.683958	3.84807	-6.73576	12.4473
At2g10940	4317494	4319185	Complement	F15K19.1	protease inhibitor/seedstorage/lipid transfer protein (LTP) family protein	-8.61856	5.1353	1.64907	0.0713512	-1.48361	6.55793	8.61856		At1g35710	13222152	13225893	sense	F14D7.1	leucine-rich repeat transmembraneprotein kinase putative	12.4002	-1.92668	-2.00744	-3.10997	4.82717	-3.62284	12.4002
At4g23690	12338881	12339757	Complement	F9D16.160	disease resistance-responsivefamily protein / dirigent family protein	-8.56692	0.51818	2.93887	3.01595	-5.78102	3.03165	8.56692		At2g18660	8097740	8098738	Complement	MSF3.4	expansin family protein (EXPR3)	12.3241	-2.42799	-2.52508	-1.98497	4.20032	-4.75943	12.3241
At1g16705	5712081	5713742	sense	F17F16.9	p300/CBPacetyltransferase-related protein-related	-8.29891	2.35403	2.67792	0.576131	-2.85786	5.03733	8.29891		At3g01290	88064	89429	Complement	T4P13.3	band 7 family protein	11.7994	-1.68516	-1.1297	-4.25236	4.90846	-2.51941	11.7994
At5g15230	4944906	4946219	sense	F8M21.120	gibberellin-regulated protein 4(GASA4) / gibberellin-responsive protein 4	-7.9581	1.09248	0.133508	5.18904	-4.37228	1.06994	7.9581		At4g11650	7024850	7026140	Complement	T5C23.80	osmotin-like protein (OSM34)	11.3626	-2.47597	-1.18612	-3.23079	3.95755	-3.31757	11.3626
At1g48480	17922059	17924653	sense	T1N15.9	leucine-rich repeat transmembraneprotein kinase putative	-7.88998	3.53105	0.572532	2.00131	-2.22739	3.63158	7.88998		At5g10760	3400343	3402204	Complement	T30N20.30	aspartyl protease familyprotein	11.2536	-2.44709	-2.42313	-2.37766	4.42817	-4.56196	11.2536
At5g13140	4170563	4171797	Complement	T19L5.100	expressed protein	-7.85561	4.23431	1.49881	0.312246	-1.56889	5.52297	7.85561		At2g43820	18159304	18160985	sense	F18O19.7	UDP-glucoronosyl/UDP-glucosyltransferase family protein	11.1596	-1.46602	-1.84289	-3.56063	5.11873	-2.99289	11.1596
At4g23820	12397048	12400101	Complement	F9D16.290	glycoside hydrolase family 28protein / polygalacturonase (pectinase) family protein	-7.85138	3.24428	1.81951	1.06856	-2.54172	4.74876	7.85138		At5g22300	7379221	7381928	sense	T6G21.6	nitrilase 4 (NIT4)	10.9743	-1.48604	-2.39244	-3.05993	5.20515	-3.53558	10.9743
At3g28830	10832470	10834521	sense	T19N8.13	expressed protein	-7.75136	0.627018	2.62372	2.85467	-5.19956	2.86348	7.75136		At3g60390	22331570	22333561	Complement	T8B10.50	homeobox-leucine zipper protein3 (HAT3) / HD-ZIP protein 3	10.7182	-2.61335	-0.916179	-3.54283	3.94554	-3.15762	10.7182
At2g41540	17333175	17336900	sense	T32G6.6	NAD-dependentglycerol-3-phosphate dehydrogenase family protein	-7.74395	3.87902	2.54077	-0.361826	-1.83873	6.64481	7.74395		At3g50420	18721852	18724630	Complement	T20E23.20	pentatricopeptide (PPR)repeat-containing protein	10.6652	-1.36079	-2.01768	-3.82603	5.51795	-3.03382	10.6652
At2g22670	9643520	9645763	sense	T9I22.11	auxin-responsive protein /indoleacetic acid-induced protein 8 (IAA8)	-7.69112	2.16597	1.06284	2.1247	-2.85029	2.93867	7.69112		At4g14365	8271460	8273733	Complement	FCAALL.197	zinc finger (C3HC4-type RINGfinger) family protein / ankyrin repeat family protein	10.6462	-2.04378	-0.876526	-3.50497	3.91942	-2.61675	10.6462
At3g16340	5539903	5546410	sense	T2O4.15	ABC transporter family protein	-7.60711	2.69054	2.12808	0.932085	-2.70637	4.59619	7.60711		At1g61800	22828105	22830411	sense	F8K4.1	glucose-6-phosphate/phosphatetranslocator putative	10.5955	-2.95066	-2.14426	-1.6013	3.37684	-4.8852	10.5955
At1g78950	29689330	29693566	Complement	YUP8H12R.44	beta-amyrin synthaseputative	-7.60142	0.118956	3.16317	2.56234	-5.67454	2.81526	7.60142		At1g21250	7439255	7442082	sense	F16F4.6	wall-associated kinase 1 (WAK1)	10.4915	-2.13239	-2.28191	-2.68631	4.5982	-4.07059	10.4915
At5g66590	26591407	26592098	sense	K1F13.27	allergen V5/Tpx-1-related familyprotein	-7.58486	3.79007	1.92203	0.28649	-1.91162	5.53459	7.58486		At3g22550	7991653	7993461	Complement	F16J14.11	senescence-associatedprotein-related	10.4597	-3.45219	-2.49197	-0.551801	2.66513	-6.13479	10.4597
At1g20010	6937786	6940573	Complement	T20H2.21	tubulin beta-5 chain (TUB5)	-7.38123	2.60803	1.48739	1.68652	-2.81242	3.7518	7.38123		At1g20070	6958001	6959114	Complement	T20H2.15	expressed protein	10.3478	-2.45374	-1.26769	-2.92217	3.77917	-3.38547	10.3478
At4g34590	16521866	16523235	sense	T4L20.170	bZIP transcription factorfamily protein	-7.37943	2.84897	3.34611	-0.363673	-2.48069	6.39074	7.37943		At5g23010	7703095	7706894	sense	T20O7.3	2-isopropylmalate synthase 3(IMS3)	10.3142	-1.31237	-2.27356	-2.8642	4.92187	-3.26341	10.3142
At3g02110	370777	373729	Complement	F1C9.10	serine carboxypeptidase S10family protein	-7.24203	2.53169	1.76307	1.2978	-2.71587	3.99962	7.24203		At2g44240	18296900	18299421	sense	F4I1.5	expressed protein	10.2608	-1.93799	-2.28087	-2.24523	4.21655	-3.93568	10.2608
At4g39330	18291214	18293068	sense	T22F8.230	mannitol dehydrogenaseputative	-7.19586	-0.0152406	0.407104	6.45898	-5.74614	0.339569	7.19586		At4g37370	17569822	17571698	Complement	F6G17.20	cytochrome P450 putative	10.2292	-2.00116	-1.99722	-2.54258	4.21271	-3.69646	10.2292
At3g15420	5207711	5208296	Complement	MJK13.8	expressed protein	-7.12673	2.53462	0.957568	1.98135	-2.58819	3.14994	7.12673		At3g28500	10683334	10683968	sense	T20D4.1	60S acidic ribosomal protein P2(RPP2C)	10.1594	-1.63258	-2.15295	-2.91215	4.77281	-3.45713	10.1594
At5g22920	7664994	7667268	sense	MRN17.15	zinc finger (C3HC4-type RINGfinger) family protein	-7.12603	3.31883	1.71017	0.130001	-1.58627	5.09507	7.12603		At3g13920	4592263	4594926	Complement	MDC16.5	eukaryotic translation initiationfactor 4A-1 / eIF-4A-1	10.1013	-1.4636	-1.22682	-4.38065	5.09305	-2.39416	10.1013
At4g08685	5550426	5551816	sense	T3F12.13	pollen Ole e 1 allergen andextensin family protein	-7.05743	0.534461	0.686634	4.90114	-4.86871	1.06697	7.05743		At1g74590	28027288	28028387	Complement	F1M20.27	glutathione S-transferaseputative	9.8139	-1.81177	-1.95926	-2.5452	4.17345	-3.46892	9.8139
At1g75500	28341453	28343821	Complement	F1B16.19	nodulin MtN21 family protein	-7.05322	2.90185	0.297419	2.30428	-2.22271	2.80223	7.05322		At5g26920	9476669	9478724	sense	F2P16.9	calmodulin-binding protein	9.77359	-2.21965	-1.64572	-2.70534	3.95462	-3.53835	9.77359
At1g04680	1303528	1307881	Complement	T1G11.7	pectate lyase family protein	-6.97801	1.16206	-0.51099	5.71879	-3.96946	0.565242	6.97801		At4g10500	6491085	6492442	sense	F7L13.80	oxidoreductase 2OG-Fe(II)oxygenase family protein	9.66981	-2.17425	-1.7566	-2.68696	4.05063	-3.60002	9.66981
At3g49180	18240751	18243209	sense	F2K15.40	transducin family protein /WD-40 repeat family protein	-6.97055	2.46567	3.4905	-0.247581	-2.71224	5.93598	6.97055		At4g35090	16700637	16703292	Complement	M4E13.140	catalase 2	9.61131	-2.08593	-1.23351	-2.98525	3.81087	-3.00724	9.61131
At5g49460	20071855	20075690	sense	K7J8.14	ATP-citrate synthase putative /ATP-citrate (pro-S-)-lyase putative / citrate cleavageenzyme putative	-6.93135	2.07109	0.344601	3.07584	-2.92454	2.12203	6.93135		At1g61120	22527302	22532476	sense	F11P17.15	terpene synthase/cyclase familyprotein	9.58297	-2.59459	-1.6937	-2.19799	3.50758	-3.97062	9.58297
At1g11850	3999201	3999875	sense	F12F1.31	expressed protein	-6.92796	2.96361	0.884426	1.88954	-2.42356	3.43565	6.92796		At3g51610	19150536	19153057	Complement	F26O13.250	expressed protein	9.53332	-1.77852	-1.65182	-3.1676	4.43048	-3.10515	9.53332
At5g44680	18041442	18043172	Complement	K23L20.1	methyladenine glycosylase familyprotein	-6.86781	2.31664	2.23749	1.02284	-2.88082	4.24424	6.86781		At2g25510	10863505	10864234	sense	F13B15.17	expressed protein	9.52744	-1.04416	-1.58563	-4.3	5.46484	-2.3323	9.52744
At4g36110	17089952	17090828	sense	T19K4.240	auxin-responsive proteinputative	-6.78905	2.01224	4.24184	-0.469858	-3.07368	6.16361	6.78905		At4g14690	8418278	8419258	sense	FCAALL.232	chlorophyll A-B binding familyprotein / early light-induced protein putative	9.49918	-0.0552865	-4.33057	-2.42103	6.91229	-3.69968	9.49918
At1g51460	19080650	19085101	Complement	F5D21.8	ABC transporter family protein	-6.77899	-0.578166	1.17094	5.69436	-6.32685	0.502865	6.77899		At5g62730	25214720	25217259	sense	MQB2.30	proton-dependent oligopeptidetransport (POT) family protein	9.41925	-1.03819	-2.68835	-2.89308	5.34659	-3.34455	9.41925
At3g10540	3289700	3292707	sense	F13M14.18	3-phosphoinositide-dependentprotein kinase putative	-6.70792	1.84973	1.64607	1.78702	-3.07687	3.18967	6.70792		At1g77450	29104848	29106155	sense	T5M16.4	no apical meristem (NAM) familyprotein	9.25053	-1.75829	-1.916	-2.62008	4.19106	-3.3608	9.25053
At1g13280	4547521	4548872	sense	T6J4.4	allene oxide cyclase familyprotein	-6.69503	0.823092	1.5841	2.92563	-4.15984	2.13343	6.69503		At1g76960	28925351	28925850	Complement	F22K20.6	expressed protein	9.17456	-1.71632	-2.2335	-2.34424	4.26045	-3.63605	9.17456
At3g14350	4782764	4787174	Complement	MLN21.15	leucine-rich repeattransmembrane protein kinase putative	-6.64939	1.55379	4.05704	0.117087	-3.54719	5.24563	6.64939		At5g54610	22202005	22203733	Complement	MRB17.11	ankyrin repeat family protein	9.15442	-1.45475	-0.69096	-4.62343	4.64765	-1.89168	9.15442
At1g55360	20669888	20672392	Complement	F7A10.1	expressed protein	-6.64931	1.86228	0.964276	2.45504	-3.01886	2.52926	6.64931		At4g16740	9407790	9410899	sense	FCAALL.18	terpene synthase/cyclase familyprotein	9.15274	-1.50799	-1.70245	-3.15116	4.49091	-2.89765	9.15274
At2g39510	16498221	16500210	Complement	F12L6.17	nodulin MtN21 family protein	-6.64248	0.612152	3.98282	0.801794	-4.28193	4.07812	6.64248		At5g45380	18408351	18413053	sense	MFC19.5	sodium:solute symporter familyprotein	9.14639	-1.1846	-2.56655	-2.29132	4.64987	-3.42359	9.14639
At1g75390	28295426	28296669	sense	F1B16.8	bZIP transcription factor familyprotein	-6.63719	1.29484	1.67761	2.34629	-3.6538	2.66829	6.63719		At3g26770	9846721	9848385	sense	MDJ14.1	short-chaindehydrogenase/reductase (SDR) family protein	9.0521	-2.55645	-1.29772	-2.42444	3.32905	-3.51671	9.0521
At5g15580	5068304	5072495	Complement	T20K14.190	expressed protein	-6.59115	0.703305	1.24647	3.51807	-4.31726	1.71576	6.59115		At4g23260	12167433	12169904	Complement	F21P8.150	protein kinase family protein	9.04033	-1.92736	-2.02024	-2.49482	4.13883	-3.61574	9.04033
At2g45470	18749614	18751185	Complement	F4L23.2	fasciclin-likearabinogalactan-protein (FLA8)	-6.53313	-0.414941	0.460636	6.53268	-5.87024	0.0369418	6.53313		At2g31880	13561973	13564054	sense	F20M17.8	leucine-rich repeattransmembrane protein kinase putative	9.03565	-0.419391	-2.41309	-3.98969	6.23116	-2.47367	9.03565
At1g04250	1136257	1138582	sense	F19P19.31	auxin-responsive protein /indoleacetic acid-induced protein 17 (IAA17)	-6.49597	1.94104	1.22764	1.80486	-2.70513	2.88471	6.49597		At1g65500	24361530	24362279	sense	F5I14.4	expressed protein	9.03011	-2.32339	-2.64219	-1.12137	3.38924	-4.82324	9.03011
At1g52190	19438192	19442640	sense	F9I5.4	proton-dependent oligopeptidetransport (POT) family protein	-6.47967	2.42038	3.20415	-0.148299	-2.58283	5.46338	6.47967		At5g26340	9243514	9247069	Complement	F9D12.17	hexose transporter putative	9.01074	-0.783043	-2.44778	-3.33175	5.55658	-2.86396	9.01074
At5g22580	7502681	7503448	sense	MQJ16.12	expressed protein	-6.4794	0.850171	-0.473364	5.84978	-4.16678	0.328905	6.4794		At4g20110	10875299	10878740	sense	F18F4.210	vacuolar sorting receptorputative	9.00349	-1.06627	-1.00943	-4.11559	4.66785	-1.84035	9.00349
At4g12730	7491380	7492873	Complement	T20K18.80	fasciclin-likearabinogalactan-protein (FLA2)	-6.43028	2.31843	2.83207	0.26499	-2.67232	4.8913	6.43028		At1g52200	19445744	19447094	Complement	F9I5.19	expressed protein	8.95556	-1.38653	-1.50861	-2.93039	4.14509	-2.62049	8.95556
At5g12250	3961107	3963468	Complement	MXC9.21	tubulin beta-6 chain (TUB6)	-6.42332	1.27653	1.48845	2.51296	-3.60245	2.46946	6.42332		At2g04160	1401447	1407691	Complement	F3L12.2	subtilisin-like protease (AIR3)	8.92169	-2.24675	-2.839	-1.15865	3.59087	-4.89009	8.92169
At1g29500	10321196	10321850	sense	F15D2.8	auxin-responsive proteinputative	-6.41481	2.14941	3.00862	0.0456799	-2.60058	5.05159	6.41481		At5g24210	8217341	8219622	sense	K12G2.1	lipase class 3 family protein	8.88143	-0.608343	-2.05444	-3.95242	5.76483	-2.34187	8.88143
At3g52470	19461627	19462590	sense	F22O6.150	harpin-induced family protein /HIN1 family protein / harpin-responsive family protein	-6.41423	4.11844	1.54637	-0.196777	-1.15756	5.43964	6.41423		At2g37770	15841961	15844079	sense	T8P21.32	aldo/keto reductase familyprotein	8.80171	-1.94587	-1.16815	-3.26173	3.98333	-2.79245	8.80171
At5g20270	6840835	6842860	Complement	F5O24.160	expressed protein	-6.37651	2.82351	3.02346	-0.432968	-2.16735	5.78961	6.37651		At4g23700	12342438	12346052	Complement	F9D16.170	cation/hydrogen exchangerputative (CHX17)	8.77428	-2.20091	-1.30973	-2.56744	3.47483	-3.19268	8.77428
At1g05850	1766502	1768662	Complement	T20M3.12	chitinase-like protein 1 (CTL1)	-6.34049	3.15632	0.820283	1.12329	-1.69083	3.59529	6.34049		At3g03480	828303	829903	Complement	T21P5.10	transferase family protein	8.76221	-1.63438	-1.97741	-2.50808	4.13537	-3.29655	8.76221
At4g37870	17802688	17806530	Complement	T28I19.150	phosphoenolpyruvatecarboxykinase [ATP] putative / PEP carboxykinaseputative / PEPCK putative	-6.32884	1.3474	2.89261	0.791487	-3.2767	3.94914	6.32884		At4g04500	2238409	2240863	sense	T26N6.11	protein kinase family protein	8.75832	-0.912583	-2.42313	-3.01305	5.19837	-2.97566	8.75832
At5g63810	25554300	25558755	sense	MBK5.1	beta-galactosidase putative /lactase putative	-6.24184	2.40535	2.17652	0.358895	-2.19977	4.43317	6.24184		At1g73260	27550935	27551851	Complement	T18K17.7	trypsin and protease inhibitorfamily protein / Kunitz family protein	8.75678	-1.57478	0.377736	-6.24603	4.58829	-1.03419	8.75678
At5g55730	22575374	22577687	Complement	MDF20.17	fasciclin-likearabinogalactan-protein (FLA1)	-6.20642	0.175883	0.666546	4.87535	-4.81063	0.732518	6.20642		At5g60900	24515693	24518720	Complement	MSL3.2	lectin protein kinase familyprotein	8.72985	-2.19202	-1.87516	-1.89803	3.42072	-3.78772	8.72985
At2g14890	6406703	6408082	sense	T26I20.5	arabinogalactan-protein (AGP9)	-6.19534	0.726546	0.0350676	4.91775	-4.07374	0.664087	6.19534		At5g44580	17996538	17997634	sense	K15C23.2	expressed protein	8.72731	-2.13382	-2.36387	-1.41254	3.42451	-4.28038	8.72731
At3g28980	10994427	10996239	Complement	K5K13.11	expressed protein	-6.17947	2.98627	2.52814	-0.312049	-1.87126	5.44731	6.17947		At4g23150	12125742	12128343	sense	F21P8.40	protein kinase family protein	8.65685	-1.59685	-2.17305	-2.19418	4.04381	-3.4658	8.65685
At4g14440	8306741	8307749	Complement	FCAALL.212	enoyl-CoA hydratase/isomerasefamily protein	-5.99502	0.404456	0.333938	4.7273	-4.25783	0.644985	5.99502		At2g32680	13866846	13869691	Complement	F24L7.18	disease resistance familyprotein	8.63136	-1.79675	-1.95334	-2.50387	4.09243	-3.42199	8.63136
At3g12685	4029190	4030362	Complement	MBK21.6	expressed protein	-5.95339	1.24218	0.716147	3.06664	-3.31477	1.72768	5.95339		At3g04210	1105976	1108076	Complement	T6K12.17	disease resistance protein(TIR-NBS class) putative	8.59255	-0.817558	-2.17766	-3.1703	5.11713	-2.66322	8.59255
At2g39900	16665789	16667515	sense	T28M21.6	LIM domain-containing protein	-5.91308	0.634787	0.52912	4.07472	-3.96887	1.01894	5.91308		At4g17340	9699265	9700421	sense	FCAALL.412	major intrinsic family protein/ MIP family protein	8.55485	-0.0814982	-2.7291	-3.7293	6.42947	-2.41907	8.55485
At5g50790	20673479	20675225	Complement	MFB16.26	nodulin MtN3 family protein	-5.90897	0.0783447	4.69026	0.551619	-4.58432	3.96515	5.90897		At3g23540	8443494	8448077	sense	MDB19.2	expressed protein	8.52993	-1.70661	-1.96949	-1.97617	3.66032	-3.41473	8.52993
At3g12080	3847798	3852075	sense	T21B14.10	GTP-binding family protein	-5.84853	0.984408	3.1894	0.867606	-3.59692	3.75976	5.84853		At1g66880	24950591	24959274	sense	F4N21.1	serine/threonine protein kinasefamily protein	8.50273	-2.16109	-1.57164	-2.18339	3.39989	-3.43358	8.50273
At3g43680	15587444	15589257	sense	F23N14.60	hypothetical protein	-5.83094	1.62432	1.08085	2.12785	-2.83829	2.42134	5.83094		At2g37540	15758653	15761045	Complement	F13M22.4	short-chaindehydrogenase/reductase (SDR) family protein	8.48254	-1.20625	-3.39193	-1.40133	4.43955	-4.24779	8.48254
At2g42570	17724453	17727158	Complement	F14N22.16	expressed protein	-5.81208	2.13601	0.551832	2.12091	-2.31292	2.38183	5.81208		At5g58770	23751602	23752860	sense	MZN1.21	dehydrodolichyl diphosphatesynthase putative / DEDOL-PP synthase putative	8.4378	-0.761466	-1.33056	-4.37601	5.23317	-1.84311	8.4378
At2g29550	12651124	12653114	Complement	F16P2.7	tubulin beta-7 chain (TUB7)	-5.76118	1.0044	-0.59944	5.15684	-3.53885	0.353958	5.76118		At3g26160	9569517	9571123	Complement	MTC11.7	cytochrome P450 family protein	8.42746	-0.451266	-1.99406	-4.03769	5.76089	-2.13985	8.42746
At5g23860	8042886	8044822	sense	MRO11.10	tubulin beta-8 chain (TUB8)(TUBB8)	-5.75587	1.04468	0.256068	3.74387	-3.37491	1.1405	5.75587		At1g77120	28980345	28982311	sense	F22K20.19	alcohol dehydrogenase (ADH)	8.41461	-2.00459	-2.60404	-1.38875	3.61456	-4.35435	8.41461
At3g16160	5473372	5475096	Complement	MSL1.20	tesmin/TSO1-like CXCdomain-containing protein	-5.72333	-0.348316	1.03797	4.68804	-5.14611	0.591307	5.72333		At4g23810	12392383	12393951	Complement	T32A16.2	WRKY family transcriptionfactor	8.38511	-1.82792	-2.57868	-1.00349	3.23959	-4.28163	8.38511
At5g18500	6138491	6141632	sense	F20L16.220	protein kinase family protein	-5.71206	2.73632	0.650681	1.31087	-1.69839	3.03099	5.71206		At1g58340	21656689	21659102	sense	F19C14.5	MATE efflux protein-related	8.33413	0.114674	-2.34392	-4.33215	6.62734	-1.90867	8.33413
At2g13610	5680770	5682913	Complement	T10F5.15	ABC transporter family protein	-5.62168	2.7247	2.50628	-0.407027	-1.76485	5.14499	5.62168		At2g47880	19612110	19612732	sense	T9J23.13	glutaredoxin family protein	8.31419	-1.634	-1.71132	-2.93094	4.23599	-3.0138	8.31419
At4g17460	9739692	9741158	sense	FCAALL.65	homeobox-leucine zipper protein1 (HAT1) / HD-ZIP protein 1	-5.61408	0.709638	0.39494	3.93765	-3.69897	0.966839	5.61408		At3g54380	20144872	20147769	Complement	T12E18.70	SAC3/GANP family protein	8.28948	-1.86616	-1.78059	-2.4116	3.81188	-3.32632	8.28948
At1g32090	11540151	11544059	Complement	F3C3.11	early-responsive to dehydrationprotein-related / ERD protein-related	-5.59883	3.20844	0.720608	0.745309	-1.26559	3.54854	5.59883		At5g39680	15900407	15903616	Complement	MIJ24.150	pentatricopeptide (PPR)repeat-containing protein	8.16934	-1.91616	-1.03456	-3.16869	3.7397	-2.63771	8.16934
At2g34560	14567242	14569924	sense	T31E10.10	katanin putative	-5.5723	0.752496	0.967411	3.0964	-3.60915	1.51354	5.5723		At1g66390	24767620	24769203	sense	T27F4.14	myb family transcription factorputative / production of anthocyanin pigment 2 protein(PAP2)	8.15186	-1.65527	-2.08472	-2.05101	3.80862	-3.44246	8.15186
At1g48300	17851024	17852466	sense	F11A17.15	expressed protein	-5.48043	1.64685	4.10861	-0.720131	-2.72762	5.47172	5.48043		At1g32940	11937576	11940958	sense	F9L11.11	subtilase family protein	8.05675	-1.74456	-1.02869	-3.38822	3.92333	-2.47137	8.05675
At5g35360	13601389	13606337	sense	T26D22.8	acetyl-CoA carboxylase biotincarboxylase subunit (CAC2)	-5.46021	0.0786482	0.775026	3.98666	-4.24791	0.740927	5.46021		At4g23220	12153967	12156948	Complement	F21P8.110	protein kinase family protein	8.03885	-1.7477	-2.18005	-1.58465	3.43892	-3.67552	8.03885
At2g37640	15794783	15796931	Complement	F13M22.14	expansin putative (EXP3)	-5.43713	3.97021	0.52473	0.426755	-0.820361	3.96599	5.43713		At3g25580	9293725	9295584	sense	MWL2.25	thioredoxin-related	8.01689	-1.67939	-1.84349	-2.12616	3.62134	-3.23002	8.01689
At3g16740	5699339	5700832	sense	MGL6.21	F-box family protein	-5.38411	2.08346	2.43589	0.182815	-2.2555	4.22937	5.38411		At1g09970	3252242	3255695	sense	F21M12.36	leucine-rich repeattransmembrane protein kinase putative	7.99324	-0.761825	-1.88688	-3.13562	4.77825	-2.35169	7.99324
At5g62350	25054652	25055588	sense	MMI9.21	invertase/pectin methylesteraseinhibitor family protein / DC 1.2 homolog (FL5-2I22)	-5.38394	1.4884	-0.819719	4.43434	-2.80795	0.576543	5.38394		At5g48400	19633470	19636472	sense	MJE7.3	glutamate receptor family protein(GLR1.2)	7.92245	-1.23446	-1.37313	-2.98998	4.0057	-2.33975	7.92245
At2g29980	12788668	12792129	Complement	F23F1.10	omega-3 fatty acid desaturaseendoplasmic reticulum (FAD3)	-5.37085	0.899753	-0.473432	4.67727	-3.25422	0.371491	5.37085		At3g28220	10525641	10527965	sense	T19D11.1	meprin and TRAF homologydomain-containing protein / MATH domain-containingprotein	7.89009	-3.06073	-3.12992	-0.0115796	2.67758	-6.1923	7.89009
At3g16010	5434020	5436270	sense	MSL1.5	pentatricopeptide (PPR)repeat-containing protein	-5.35483	2.82457	0.294589	1.54862	-1.57888	2.73062	5.35483		At2g13810	5775528	5779341	sense	F13J11.16	aminotransferase class I and IIfamily protein	7.88452	-1.6803	-1.48779	-2.71624	3.81237	-2.85925	7.88452
At5g22740	7554931	7560076	Complement	MDJ22.16	glycosyl transferase family 2protein	-5.33049	1.69138	-1.53458	5.11791	-2.46097	0.139558	5.33049		At4g37990	17855886	17857633	sense	F20D10.110	mannitol dehydrogenaseputative (ELI3-2)	7.86197	-1.08276	-0.139693	-5.51224	4.67629	-1.06606	7.86197
At3g11160	3496073	3497169	Complement	F9F8.28	expressed protein	-5.31713	-0.0400131	1.3291	3.13828	-4.25768	1.11026	5.31713		At2g18690	8104504	8105909	sense	MSF3.7	expressed protein	7.84806	-2.5083	-0.454322	-2.97964	2.96499	-2.60747	7.84806
At3g52840	19592132	19597277	sense	F8J2.10	beta-galactosidase putative /lactase putative	-5.30454	4.3965	-0.585869	1.15244	-0.471324	3.06571	5.30454		At3g51410	19092336	19093108	Complement	F26O13.50	expressed protein	7.80531	-1.0322	-1.3939	-2.99557	4.07614	-2.17146	7.80531
At1g29670	10375753	10378144	sense	F15D2.22	GDSL-motif lipase/hydrolasefamily protein	-5.29395	1.93537	-0.821975	3.67682	-2.22146	0.941489	5.29395		At1g35230	12917127	12917741	sense	T9I1.2	arabinogalactan-protein (AGP5)	7.80166	-2.0466	-1.26586	-2.611	3.46805	-2.98647	7.80166
At1g55330	20652133	20652557	Complement	F7A10.11	arabinogalactan-protein (AGP21)	-5.2921	2.379	2.08949	0.21482	-1.98994	4.14852	5.2921		At1g69730	26232295	26235002	Complement	T6C23.7	protein kinase family protein	7.79447	-1.72526	-2.05032	-2.08859	3.77685	-3.45366	7.79447
At1g10200	3346392	3347849	Complement	F14N23.8	transcription factor LIMputative	-5.27955	1.67861	1.02459	1.73692	-2.43355	2.42453	5.27955		At1g66970	24996216	24999780	Complement	F1O19.5	glycerophosphoryl diesterphosphodiesterase family protein	7.75338	-1.69939	-2.04808	-1.98811	3.67619	-3.43818	7.75338
At4g36250	17150941	17153581	sense	F23E13.140	aldehyde dehydrogenase familyprotein	-5.2786	1.77115	-0.106253	2.95944	-2.37215	1.44445	5.2786		At4g11890	7148242	7149915	sense	T26M18.100	protein kinase family protein	7.74908	-1.52861	-1.58785	-2.70741	3.92512	-2.80921	7.74908
At3g02550	536512	538005	Complement	F16B3.18	LOB domain protein 41 / lateralorgan boundaries domain protein 41 (LBD41)	-5.26923	0.995349	-0.277862	4.25051	-3.2311	0.624306	5.26923		At5g24160	8183105	8186643	Complement	K12G2.4	squalene monooxygenase 12 /squalene epoxidase 12 (SQP12)	7.67715	-1.54619	-1.40207	-2.6574	3.70288	-2.66105	7.67715
At2g44670	18432255	18433135	sense	F16B22.16	senescence-associatedprotein-related	-5.22348	2.69814	1.70563	0.201929	-1.64747	4.09083	5.22348		At1g28600	10051000	10053103	Complement	F1K23.28	lipase putative	7.67099	-0.922885	-2.14955	-2.75811	4.62014	-2.74031	7.67099
At2g35120	14812718	14814415	Complement	T4C15.21	glycine cleavage system Hprotein mitochondrial putative	-5.20893	0.396999	0.634402	3.49018	-3.62468	0.902226	5.20893		At3g04720	1285573	1286568	Complement	F7O18.21	hevein-like protein (HEL)	7.66377	-1.86811	-2.12065	-1.88714	3.62824	-3.66165	7.66377
At3g30730	12359875	12360078	Complement	T4A2.2	hypothetical protein	-5.18603	2.26231	1.36775	0.765712	-1.86713	3.33722	5.18603		At3g48580	18018166	18019472	sense	T8P19.90	xyloglucan:xyloglucosyltransferase putative / xyloglucan endotransglycosylaseputative / endo-xyloglucan transferase putative	7.66349	-1.66867	-0.974478	-2.92573	3.47647	-2.36739	7.66349
At5g01090	32831	34325	sense	F7J8.70	legume lectin family protein	-5.17896	0.523595	0.363988	3.87262	-3.59912	0.77669	5.17896		At1g17170	5869839	5870833	sense	F20D23.13	glutathione S-transferaseputative	7.65646	-1.3369	-0.830008	-3.94334	4.19845	-1.91437	7.65646
At2g43550	18080311	18080982	sense	T1O24.29	trypsin inhibitor putative	-5.17575	-0.439487	0.486761	5.1702	-4.83039	0.0380782	5.17575		At1g33960	12346229	12348464	sense	T3M13.2	avirulence-responsive protein /avirulence induced gene (AIG1)	7.64699	-1.98137	-1.09248	-2.75034	3.41864	-2.7582	7.64699
At5g16590	5431684	5434113	sense	MTG13.3	leucine-rich repeat transmembraneprotein kinase putative	-5.15728	2.66516	1.41542	0.379287	-1.55522	3.78314	5.15728		At1g01470	172146	172923	Complement	F22L4.3	late embryogenesis abundantprotein putative / LEA protein putative	7.60598	-0.811826	-0.126172	-5.63056	4.70798	-0.81864	7.60598
At1g66150	24635072	24638412	sense	F15E12.4	leucine-rich repeat proteinkinase putative (TMK1)	-5.15223	1.9464	2.33339	0.122419	-2.10847	4.05958	5.15223		At3g26190	9584702	9586346	Complement	MTC11.13	cytochrome P450 71B21 putative(CYP71B21)	7.60578	-1.37424	-2.17359	-2.17141	4.00591	-3.22321	7.60578
At3g20780	7263906	7268578	Complement	MOE17.8	topoisomerase 6 subunit B(TOP6B)	-5.11129	2.26116	0.725209	1.19045	-1.66691	2.69218	5.11129		At2g36750	15417541	15419117	Complement	F13K3.15	UDP-glucoronosyl/UDP-glucosyltransferase family protein	7.59717	-1.46503	-2.01714	-2.01792	3.70605	-3.18591	7.59717
At2g30070	12842132	12845675	sense	T27E13.19	potassium transporter (KUP1)	-5.10762	2.30092	1.02439	0.999721	-1.76201	3.02163	5.10762		At4g37560	17646402	17648616	sense	F6G17.13	formamidase putative /formamide amidohydrolase putative	7.57163	-1.62143	-2.4098	-1.33633	3.41564	-3.78584	7.57163
At1g19670	6803602	6804965	Complement	F14P1.11	coronatine-responsive protein /coronatine-induced protein 1 (CORI1)	-5.08648	0.483035	-0.18492	4.68412	-3.62428	0.261802	5.08648		At1g65490	24358434	24358975	sense	F5I14.26	expressed protein	7.55679	-0.665045	-4.61897	-0.801626	4.83454	-4.68742	7.55679
At3g15590	5275408	5277994	Complement	MQD17.5	DNA-binding protein putative	-5.02087	2.8038	0.448632	1.24177	-1.45602	2.86246	5.02087		At2g35980	15117667	15118550	sense	F11F19.11	harpin-induced family protein(YLS9) / HIN1 family protein / harpin-responsive familyprotein	7.51111	-2.01016	-1.14397	-2.47726	3.21851	-2.84545	7.51111
At3g19520	6772696	6774449	sense	T31J18.2	expressed protein	-5.01837	2.11592	1.28241	0.973268	-1.96998	3.0828	5.01837		At5g45800	18592809	18596324	Complement	MRA19.24	leucine-rich repeattransmembrane protein kinase putative	7.47005	-1.24676	-3.27056	-1.28402	4.13508	-4.14175	7.47005
At3g62600	23161766	23164486	Complement	F26K9.30	DNAJ heat shock family protein	-5.00165	0.498418	0.225334	3.98575	-3.55143	0.631998	5.00165		At1g01560	202267	204335	sense	F22L4.10	mitogen-activated proteinkinase putative / MAPK putative (MPK11)	7.46533	-1.43784	-0.718579	-3.45871	3.66753	-1.91175	7.46533
At1g75710	28432367	28434910	sense	F10A5.10	zinc finger (C2H2 type) familyprotein	-4.99555	0.855286	0.972881	2.66279	-3.20404	1.60792	4.99555		At1g27730	9648128	9649060	Complement	T22C5.18	zinc finger (C2H2 type) familyprotein (ZAT10) / salt-tolerance zinc finger protein(STZ)	7.45001	-1.12993	-2.85877	-1.7586	4.25979	-3.61485	7.45001
At5g47020	19099232	19107244	sense	MQD22.16	glycine-rich protein	-4.97926	1.44005	2.01295	0.550019	-2.24897	3.24827	4.97926		At1g07180	2204319	2206916	sense	F10K1.11	pyridine nucleotide-disulphideoxidoreductase family protein	7.4416	-1.86106	-2.53378	-1.16857	3.32265	-4.13621	7.4416
At3g02170	396019	399786	Complement	F14P3.18	expressed protein	-4.96485	2.78139	1.57609	0.0472388	-1.39809	4.05921	4.96485		At2g43510	18074251	18074877	sense	T1O24.25	trypsin inhibitor putative	7.43823	-1.71023	-1.46763	-2.41256	3.52306	-2.8764	7.43823
At2g39570	16514974	16517276	sense	F12L6.23	ACT domain-containing protein	-4.94861	0.823357	3.52886	0.0574546	-3.01994	3.95718	4.94861		At2g45760	18854081	18854895	Complement	F4I18.26	BON1-associated protein(BAP1)-related	7.42402	-1.87675	-0.511041	-2.89613	2.97084	-2.11311	7.42402
At5g45960	18654250	18657585	Complement	K15I22.16	GDSL-motif lipase/hydrolasefamily protein	-4.93454	2.77411	1.4126	0.179609	-1.3744	3.87608	4.93454		At3g13570	4429305	4432129	Complement	K20M4.1	SC35-like splicing factor 30a kD(SCL30a)	7.40817	-1.63061	-1.00204	-2.95543	3.52851	-2.35306	7.40817
At4g12880	7544379	7545301	Complement	T20K18.230	plastocyanin-likedomain-containing protein	-4.92986	0.714822	0.643226	3.08938	-3.25676	1.18991	4.92986		At2g45220	18651160	18653521	Complement	F4L23.27	pectinesterase family protein	7.39773	-2.4238	-1.6837	-1.75859	3.06499	-3.7595	7.39773
At3g14280	4760984	4762402	Complement	MLN21.7	expressed protein	-4.91862	1.21416	2.28109	0.846856	-2.75512	3.15872	4.91862		At2g02990	873505	874810	sense	T17M13.16	ribonuclease 1 (RNS1)	7.3959	0.110932	-0.866469	-5.96012	6.02212	-0.652809	7.3959
At3g56430	20934579	20936788	Complement	T5P19.80	expressed protein	-4.90248	1.00647	2.41895	0.696911	-2.76177	3.13005	4.90248		At5g61010	24571124	24573975	sense	MSL3.1	exocyst subunit EXO70 familyprotein	7.2938	-0.581305	-1.00471	-4.48328	4.90388	-1.38989	7.2938
At5g52280	21244185	21247359	sense	F17P19.19	protein transportprotein-related	-4.89169	1.87935	1.43679	0.903034	-2.0497	3.02459	4.89169		At4g13770	7990481	7992305	Complement	F18A5.160	cytochrome P450 family protein	7.27925	-0.986061	-2.4424	-2.34365	4.44064	-3.06436	7.27925
At5g02550	573052	573556	Complement	T22P11.140	expressed protein	-4.87701	1.93309	-0.916242	3.52929	-2.04455	0.863812	4.87701		At3g11440	3602100	3605110	sense	F24K9.11	myb family transcription factor(MYB65)	7.25214	-5.50132	-1.40933	0.524132	0.759503	-6.61274	7.25214
At1g77690	29205835	29208234	Complement	T32E8.2	amino acid permease putative	-4.84579	1.57012	3.16265	-0.381328	-2.30749	4.48466	4.84579		At1g60730	22361700	22363814	Complement	F8A5.24	aldo/keto reductase familyprotein	7.24383	-0.713741	-2.35005	-2.28386	4.44294	-2.72927	7.24383
At2g40540	16937942	16941666	sense	T2P4.11	potassium transporter putative(KT2)	-4.81928	1.30114	2.25286	0.65995	-2.55424	3.2412	4.81928		At2g29490	12638556	12639550	Complement	F16P2.13	glutathione S-transferaseputative	7.24263	-2.01593	-0.627042	-2.71375	2.91114	-2.35116	7.24263
At5g42680	17131824	17132640	sense	MJB21.5	expressed protein	-4.8148	1.6584	3.33346	-0.582288	-2.25982	4.72318	4.8148		At5g64000	25633864	25635850	sense	MBM17.10	3'(2')5'-bisphosphatenucleotidase putative / inositol polyphosphate1-phosphatase putative	7.17347	-1.45757	-1.84506	-2.23641	3.71487	-2.9898	7.17347
At3g13610	4449455	4451184	sense	K20M4.9	oxidoreductase 2OG-Fe(II)oxygenase family protein	-4.80819	2.32694	1.6914	0.0975552	-1.53956	3.81066	4.80819		At1g69930	26341214	26342458	Complement	T17F3.4	glutathione S-transferaseputative	7.15717	-1.66554	-1.71778	-2.23117	3.56603	-3.0634	7.15717
At1g01090	47485	49279	Complement	T25K16.8	pyruvate dehydrogenase E1component alpha subunit chloroplast	-4.78763	1.07285	2.67132	0.456899	-2.72205	3.41284	4.78763		At2g34500	14546558	14548485	Complement	T31E10.16	cytochrome P450 family protein	7.15324	-1.6731	-1.15316	-2.85048	3.56523	-2.52573	7.15324
At4g12420	7349938	7353020	Complement	T1P17.10	multi-copper oxidase putative(SKU5)	-4.78114	0.837972	0.327172	3.10215	-2.93933	1.01967	4.78114		At1g30900	10997256	11000524	sense	F17F8.23	vacuolar sorting receptorputative	7.13252	-2.74204	-2.39906	-0.321283	2.35595	-5.06488	7.13252
At5g13930	4488692	4490266	sense	MAC12.28	chalcone synthase /naringenin-chalcone synthase	-4.72656	1.54527	-1.26947	4.38469	-2.34049	0.241025	4.72656		At3g51890	19260457	19261942	Complement	ATEM1.14	expressed protein	7.1268	0.702335	-2.40072	-3.98101	6.90781	-1.39405	7.1268
At5g44340	17876422	17878328	Complement	K9L2.12	tubulin beta-4 chain (TUB4)	-4.69432	-0.542903	3.38196	1.53405	-4.56536	2.32922	4.69432		At4g19515	10640168	10642205	Complement	F24J7.1	disease resistance familyprotein	7.12336	-1.18572	-1.0567	-2.16058	2.98368	-2.03849	7.12336
At2g47930	19624045	19624751	Complement	F17A22.32	hydroxyproline-richglycoprotein family protein	-4.68181	1.22869	0.921836	1.96667	-2.53233	1.90976	4.68181		At1g59870	22038171	22043703	sense	F23H11.19	ABC transporter family protein	7.11394	0.333349	-3.0423	-3.09894	6.15755	-2.27154	7.11394
At3g16200	5491412	5493610	Complement	MYA6.1	expressed protein	-4.68154	1.37472	1.70966	1.07851	-2.45776	2.77326	4.68154		At1g24140	8536034	8537376	Complement	F3I6.6	matrixin family protein	7.10718	-1.83333	-1.36223	-2.31558	3.28898	-2.88769	7.10718
At2g28190	12021579	12023620	sense	F24D13.2	superoxide dismutase [Cu-Zn]chloroplast (SODCP) / copper/zinc superoxide dismutase(CSD2)	-4.6736	0.463682	-0.104759	4.13369	-3.26481	0.313639	4.6736		At1g09080	2929220	2931843	Complement	F7G19.5	luminal binding protein 3 (BiP-3)(BP3)	7.06564	-1.56624	-1.69171	-1.84635	3.23773	-2.99303	7.06564
At1g76160	28582836	28586006	Complement	T23E18.10	multi-copper oxidase type Ifamily protein	-4.66849	2.6477	0.313021	1.12041	-1.22724	2.60274	4.66849		At3g48600	18021106	18022361	Complement	T8P19.110	SWIB complex BAF60bdomain-containing protein	7.04835	-1.68117	-1.52539	-2.02694	3.21267	-2.92477	7.04835
At2g38310	16057141	16058246	sense	T19C21.20	expressed protein	-4.6588	0.905238	1.54459	1.65371	-2.85376	2.17717	4.6588		At1g70810	26707792	26708898	sense	F15H11.6	C2 domain-containing protein	7.04657	-0.700521	-0.199484	-5.18725	4.4538	-0.785954	7.04657
At4g29700	14543463	14545144	Complement	T16L4.210	type Iphosphodiesterase/nucleotide pyrophosphatase familyprotein	-4.63786	-0.0638647	0.628643	3.85021	-3.89025	0.488714	4.63786		At5g40780	16340879	16344502	sense	K1B16.3	lysine and histidine specifictransporter putative	7.03177	0.148134	-2.99948	-2.82626	5.77209	-2.41451	7.03177
At5g39410	15785072	15787638	Complement	MUL8.9	expressed protein	-4.63708	0.604793	0.0354693	3.75661	-3.14059	0.560634	4.63708		At2g41090	17142862	17143930	sense	T3K9.14	calmodulin-like calcium-bindingprotein 22 kDa (CaBP-22)	7.02637	-1.22729	-0.309444	-4.37378	3.96573	-1.34546	7.02637
At4g31590	15309512	15312597	Complement	F3L17.3	glycosyl transferase family 2protein	-4.60409	1.96911	1.18024	0.927027	-1.83649	2.84411	4.60409		At3g59110	21865697	21869181	sense	F17J16.160	protein kinase family protein	7.02133	-1.46558	-2.61643	-1.39955	3.64509	-3.75721	7.02133
At3g02790	604852	605428	sense	F13E7.27	zinc finger (C2H2 type) familyprotein	-4.59749	0.533442	0.0861191	3.79447	-3.25054	0.541246	4.59749		At4g23270	12171113	12173935	sense	F21P8.160	protein kinase family protein	7.02094	-0.839182	-1.3134	-3.27771	4.2235	-1.90642	7.02094
At5g19120	6414564	6415807	sense	T24G5.20	expressed protein	-4.59242	1.97277	-0.22408	2.38776	-1.80012	1.50841	4.59242		At5g52760	21404052	21404922	sense	F6N7.25	heavy-metal-associateddomain-containing protein	7.0106	-1.87297	-1.06486	-2.22321	2.94361	-2.65613	7.0106
At1g17200	5878422	5879984	sense	F20D23.10	integral membrane familyprotein	-4.58073	2.41038	-1.14328	3.03289	-1.48706	1.05269	4.58073		At5g58120	23534718	23539007	sense	K21L19.1	disease resistance protein(TIR-NBS-LRR class) putative	7.00783	-0.924787	-1.57659	-3.04389	4.23638	-2.22114	7.00783
At5g64900	25954396	25955302	sense	MXK3.13	expressed protein	-4.57718	2.20834	-0.161068	2.03727	-1.5696	1.76454	4.57718		At2g14620	6251863	6253315	sense	T6B13.14	xyloglucan:xyloglucosyltransferase putative / xyloglucan endotransglycosylaseputative / endo-xyloglucan transferase putative	7.00256	-1.01681	-2.01664	-2.30809	4.01106	-2.72382	7.00256
At1g14040	4810485	4814540	sense	F7A19.13	EXS family protein /ERD1/XPR1/SYG1 family protein	-4.50448	2.79409	1.56236	-0.289999	-1.08786	4.09508	4.50448		At5g27350	9648670	9654429	sense	F21A20.60	sugar-porter family protein 1(SFP1)	6.9996	-1.1549	-1.96329	-2.14834	3.81326	-2.81879	6.9996
At1g67830	25434992	25436635	Complement	F12A21.4	GDSL-motif lipase/hydrolasefamily protein	-4.47563	0.70227	1.2846	2.0623	-2.97587	1.74832	4.47563		At4g33050	15944456	15947026	Complement	F26P21.170	calmodulin-binding familyprotein	6.99373	-0.825372	-1.59496	-3.14532	4.37937	-2.14209	6.99373
At4g37240	17524455	17525153	sense	AP22.53	expressed protein	-4.44784	1.56285	1.73194	0.73782	-2.15722	2.96984	4.44784		At2g05380	1966817	1968033	sense	F16J10.7	glycine-rich protein (GRP3S)	6.97636	-2.50993	-2.64707	0.0629855	2.18184	-5.41151	6.97636
At5g18460	6123048	6126723	sense	F20L16.180	expressed protein	-4.44095	2.42817	0.00396679	1.50818	-1.27994	2.10325	4.44095		At1g03850	976099	977760	Complement	F21M11.22	glutaredoxin family protein	6.9156	-1.47707	-0.847232	-3.15449	3.52827	-2.06356	6.9156
At5g37020	14647258	14651617	sense	K15O15.1	auxin-responsive factor (ARF8)	-4.43434	1.5279	1.04948	1.39821	-2.14286	2.29685	4.43434		At4g19370	10566274	10567546	Complement	T5K18.150	hypothetical protein	6.90902	-0.597571	-2.01113	-2.51889	4.3286	-2.31028	6.90902
At1g60800	22387118	22391122	Complement	F8A5.31	leucine-rich repeat familyprotein / protein kinase family protein	-4.42298	1.66752	0.481032	1.76714	-1.9352	1.89988	4.42298		At5g13320	4268905	4271054	sense	T31B5.140	auxin-responsive GH3 familyprotein	6.90045	-2.9922	0.168648	-2.73639	2.14063	-2.40958	6.90045
At1g01120	57269	59167	Complement	T25K16.11	fatty acid elongase3-ketoacyl-CoA synthase 1 (KCS1)	-4.4112	-0.549795	2.70607	1.91736	-4.34027	1.78739	4.4112		At3g28700	10760802	10763351	sense	MZN14.19	expressed protein	6.85661	-1.01541	-2.07294	-2.2674	4.0133	-2.76919	6.85661
At4g04890	2476487	2482307	Complement	T1J1.3	homeobox-leucine zipper proteinprotodermal factor 2 (PDF2)	-4.41065	1.41486	-0.999175	3.86223	-2.18131	0.358524	4.41065		At2g17040	7414207	7415352	sense	F6P23.7	no apical meristem (NAM) familyprotein	6.82716	-1.95367	-2.12575	-1.47657	3.21784	-3.74129	6.82716
At1g70270	26468063	26468523	sense	F17O7.20	expressed protein	-4.408	4.38294	-0.655646	0.650808	0.0113534	3.01775	4.408		At4g15490	8852696	8854543	Complement	FCAALL.17	UDP-glucoronosyl/UDP-glucosyltransferase family protein	6.82645	-0.425477	-0.804421	-4.7171	4.85207	-1.07418	6.82645
At1g48100	17770543	17774255	sense	F21D18.18	glycoside hydrolase family 28protein / polygalacturonase (pectinase) family protein	-4.40732	4.06614	-1.00088	1.22524	-0.175245	2.39792	4.40732		At2g37750	15838067	15838636	sense	T8P21.37	expressed protein	6.80338	-1.02572	0.0307382	-5.05266	4.09955	-0.867232	6.80338
At5g25610	8914236	8916724	Complement	T14C9.150	dehydration-responsive protein(RD22)	-4.40319	1.07976	2.79886	0.138301	-2.51734	3.52233	4.40319		At3g26220	9597314	9599070	Complement	MTC11.14	cytochrome P450 family protein	6.80181	-1.21492	-2.08263	-2.18976	3.90003	-2.96265	6.80181
At1g12330	4194656	4196735	sense	F5O11.6	expressed protein	-4.40158	0.740011	1.40876	1.81638	-2.87556	1.89452	4.40158		At5g18470	6127799	6129679	sense	F20L16.190	curculin-like(mannose-binding) lectin family protein	6.79018	-0.849747	-1.35484	-3.30289	4.23036	-1.94912	6.79018
At5g47820	19383709	19389978	sense	MCA23.16	kinesin-like protein (FRA1)	-4.3997	2.65844	1.30449	-0.023849	-1.10194	3.68189	4.3997		At1g51890	19278471	19282197	Complement	T14L22.10	leucine-rich repeat proteinkinase putative	6.77463	-1.42881	-1.26471	-2.13334	3.08946	-2.44547	6.77463
At5g61440	24724726	24726119	sense	MFB13.8	thioredoxin family protein	-4.39802	0.823318	0.396845	2.73826	-2.70473	1.06899	4.39802		At2g47000	19316937	19321819	Complement	F14M4.17	multidrug resistant (MDR) ABCtransporter putative	6.76273	-1.51821	-1.7292	-1.91853	3.31181	-2.9587	6.76273
At5g13460	4315870	4318363	sense	T22N19.110	calmodulin-binding familyprotein	-4.39707	1.14276	0.951106	1.80937	-2.4202	1.85947	4.39707		At5g52570	21351630	21354206	Complement	F6N7.5	beta-carotene hydroxylaseputative	6.73948	-0.989428	-1.11423	-2.57704	3.41741	-1.88595	6.73948
At2g42580	17735793	17738796	sense	F14N22.15	tetratricopeptide repeat(TPR)-containing protein	-4.377	1.24585	0.404197	2.2884	-2.31356	1.45137	4.377		At4g14400	8294448	8298598	sense	FCAALL.190	ankyrin repeat family protein	6.73738	-1.58996	-1.75746	-1.82844	3.25583	-3.05653	6.73738
At2g34650	14596851	14598867	Complement	T31E10.1	protein kinase PINOID (PID)	-4.37229	0.0480512	3.13907	0.900782	-3.59332	2.72578	4.37229		At1g74710	28073956	28077804	sense	F1M20.39	isochorismate synthase 1 (ICS1)/ isochorismate mutase	6.7277	-2.21456	-1.08708	-1.49321	2.29832	-3.04174	6.7277
At5g65670	26270884	26273607	sense	K21L13.4	auxin-responsive protein /indoleacetic acid-induced protein 9 (IAA9)	-4.36695	1.19768	1.00293	1.61157	-2.31203	1.95937	4.36695		At3g62790	23234059	23235283	Complement	F26K9.220	NADH-ubiquinoneoxidoreductase-related	6.71108	-3.93884	-1.54614	-0.102587	1.42149	-5.22091	6.71108
At4g38770	18096803	18098558	Complement	T9A14.50	proline-rich family protein(PRP4)	-4.33917	1.67461	0.1956	1.99985	-1.88107	1.63199	4.33917		At2g26560	11300847	11302881	Complement	T9J22.23	patatin putative	6.70844	-2.25199	0.15877	-3.32589	2.61382	-1.80075	6.70844
At5g01075	26881	27448	Complement	F7J8.2	expressed protein	-4.29147	0.78659	3.26605	-0.044873	-2.71772	3.6358	4.29147		At5g11920	3839392	3842372	sense	F14F18.90	glycosyl hydrolase family 32protein	6.70389	-1.31362	-1.35488	-2.4434	3.43502	-2.39939	6.70389
At1g04430	1198136	1201526	sense	F19P19.11	dehydration-responsiveprotein-related	-4.28797	1.42586	0.427862	1.95396	-2.04798	1.63558	4.28797		At4g19960	10813817	10817060	sense	F18F4.60	potassium transporter familyprotein	6.69999	-0.806317	-1.91527	-2.32911	3.97343	-2.43048	6.69999
At2g26730	11395485	11398719	sense	F18A8.10	leucine-rich repeattransmembrane protein kinase putative	-4.28403	0.63985	0.703067	2.58956	-2.86867	1.17853	4.28403		At1g14370	4915662	4918303	sense	F14L17.14	protein kinase (APK2a)	6.69655	-1.0582	-1.76668	-2.38669	3.81645	-2.53215	6.69655
At1g69040	25961482	25963970	sense	F4N2.2	ACT domain containing protein(ACR4)	-4.27816	1.92945	0.773202	1.16048	-1.67851	2.40449	4.27816		At3g50920	18933368	18934577	Complement	F18B3.200	phosphatidic acidphosphatase-related / PAP2-related	6.69093	-2.15066	-2.08881	-1.09439	2.82376	-3.95146	6.69093
At4g37300	17554749	17555855	sense	AP22.70	expressed protein	-4.26455	2.42391	0.545037	0.799246	-1.15893	2.64654	4.26455		At1g28480	10013460	10014059	Complement	F3M18.8	glutaredoxin family protein	6.69022	-0.869194	-1.23897	-3.38612	4.17994	-1.86129	6.69022
At5g56040	22712104	22715854	sense	MDA7.8	leucine-rich repeat proteinkinase putative	-4.25875	1.37378	1.01072	1.40669	-2.11663	2.12753	4.25875		At5g49480	20087969	20088864	sense	K7J8.1	sodium-inducible calcium-bindingprotein (ACP1) / sodium-responsive calcium-binding protein(ACP1)	6.68155	-0.706293	-0.503169	-4.67979	4.44362	-1.05815	6.68155
At2g47240	19399635	19404895	sense	T8I13.8	long-chain-fatty-acid--CoA ligasefamily protein / long-chain acyl-CoA synthetase familyprotein	-4.2558	1.7244	1.43831	0.739988	-1.89794	2.8378	4.2558		At1g37130	14160968	14164379	sense	F28L22.2	nitrate reductase 2 (NR2)	6.6796	-3.05317	-2.78095	0.271241	2.12022	-5.77815	6.6796
At3g13480	4393002	4393819	Complement	MRP15.14	expressed protein	-4.22444	1.94919	2.01807	-0.146579	-1.59691	3.70008	4.22444		At5g64120	25676532	25678228	Complement	MHJ24.10	peroxidase putative	6.67391	-0.392508	-3.65585	-1.23385	4.55993	-3.52778	6.67391
At1g27950	9740691	9742146	sense	F13K9.6	lipid transfer protein-related	-4.21611	1.24382	-0.219397	2.95481	-2.2708	0.891395	4.21611		At1g57630	21349304	21349822	sense	T8L23.10	disease resistance protein (TIRclass) putative	6.64329	-1.60381	-1.45402	-2.2346	3.32054	-2.75487	6.64329
At1g04310	1154765	1157710	Complement	F19P19.25	ethylene receptor-related	-4.21377	2.33594	2.09493	-0.570277	-1.2847	4.19634	4.21377		At1g05010	1431189	1432857	Complement	T7A14.12	1-aminocyclopropane-1-carboxylate oxidase / ACC oxidase /ethylene-forming enzyme (ACO) (EAT1)	6.62639	0.167095	-0.574635	-5.95394	5.58615	-0.351697	6.62639
At4g33220	16022443	16026364	sense	F4I10.150	pectinesterase family protein	-4.20189	1.96975	-0.269848	2.14527	-1.56043	1.46413	4.20189		At4g18880	10347593	10349573	Complement	F13C5.50	heat shock transcription factor21 (HSF21)	6.62554	-0.382881	-1.43512	-3.62852	4.67339	-1.59006	6.62554
At1g64405	23927395	23927999	sense	F15H21.22	expressed protein	-4.19516	2.6179	0.673549	0.521335	-1.03212	2.94039	4.19516		At1g76130	28566179	28568970	sense	T23E18.6	alpha-amylase putative /14-alpha-D-glucan glucanohydrolase putative	6.62253	0.746075	-1.44013	-5.41161	6.50326	-0.583594	6.62253
At4g14930	8538582	8541895	sense	FCAALL.200	acid phosphatase survivalprotein SurE putative	-4.19023	-0.146057	3.3251	0.720101	-3.61728	2.63744	4.19023		At3g08840	2679654	2686230	Complement	T16O11.23	D-alanine--D-alanine ligasefamily	6.60855	0.0327589	-1.58018	-4.04422	5.28648	-1.33515	6.60855
At4g29080	14323367	14325224	Complement	F25O24.14	auxin-responsive AUX/IAA familyprotein	-4.14569	0.0183092	0.575844	3.33827	-3.41773	0.515059	4.14569		At1g14130	4835721	4837588	Complement	F7A19.21	2-oxoglutarate-dependentdioxygenase putative	6.59276	-1.49858	-1.46302	-2.26391	3.35553	-2.66753	6.59276
At2g19800	8537986	8540533	Complement	F6F22.17	expressed protein	-4.13671	0.79736	0.588992	2.28798	-2.52017	1.21851	4.13671		At3g19680	6840287	6842326	sense	MMB12.17	expressed protein	6.58045	-1.76852	-0.80662	-2.29707	2.75649	-2.30879	6.58045
At1g28440	9996810	10000433	sense	F3M18.12	leucine-rich repeattransmembrane protein kinase putative	-4.13506	0.625828	0.607486	2.60597	-2.78572	1.08117	4.13506		At1g26390	9130004	9131766	Complement	T1K7.23	FAD-binding domain-containingprotein	6.57936	-1.52746	-1.71466	-1.99669	3.34382	-2.93571	6.57936
At5g22940	7676941	7679182	sense	MRN17.17	exostosin family protein	-4.12276	0.413122	1.87695	1.48318	-3.00329	2.00502	4.12276		At3g62380	23094584	23095827	Complement	T12C14.80	hypothetical protein	6.56116	-1.81756	-4.29547	0.41544	3.17389	-5.90811	6.56116
At4g14695	8419828	8420871	sense	FCAALL.286	expressed protein	-4.10816	-0.00374481	0.293558	3.70185	-3.3949	0.251212	4.10816		At4g37150	17492872	17494101	Complement	AP22.78	esterase putative	6.54118	0.0537737	-0.119923	-6.48669	5.27529	-0.0570113	6.54118
At1g52310	19481793	19484279	sense	F19K6.8	protein kinase family protein /C-type lectin domain-containing protein	-4.09283	1.57498	0.424651	1.71144	-1.83824	1.76131	4.09283		At3g45830	16852262	16856526	sense	F16L2.40	expressed protein	6.52534	-1.5472	-1.6641	-1.98216	3.28635	-2.90807	6.52534
At2g34680	14623701	14635379	Complement	T29F13.11	leucine-rich repeat familyprotein	-4.0758	-0.230651	0.97667	3.04686	-3.64852	0.639818	4.0758		At2g37970	15898050	15898921	sense	T8P21.12	SOUL heme-binding familyprotein	6.4947	0.0263903	-0.63763	-5.45006	5.25465	-0.529485	6.4947
At1g12500	4263148	4265028	Complement	T12C24.5	phosphate translocator-related	-4.07406	1.8147	1.55013	0.29946	-1.6015	3.08212	4.07406		At5g16970	5576171	5578049	Complement	F2K13.120	NADP-dependent oxidoreductaseputative (P1)	6.48949	-1.96406	-1.71486	-1.49819	2.87658	-3.37309	6.48949
At2g35860	15066842	15069199	sense	F11F19.23	beta-Ig-H3 domain-containingprotein / fasciclin domain-containing protein	-4.06862	1.87209	-0.834639	2.8328	-1.60969	0.882504	4.06862		At5g52750	21401269	21402150	sense	F6N7.24	heavy-metal-associateddomain-containing protein	6.48644	-1.62505	-1.56413	-1.88378	3.1051	-2.89901	6.48644
At1g04220	1119359	1122525	Complement	F20D22.1	beta-ketoacyl-CoA synthaseputative	-4.05764	2.65587	0.341255	0.805283	-0.985845	2.62456	4.05764		At1g10340	3390324	3392573	Complement	F14N23.22	ankyrin repeat family protein	6.43585	-1.74059	-0.763796	-2.53347	2.90138	-2.23132	6.43585
At1g80850	30390499	30392164	Complement	F23A5.20	methyladenine glycosylase familyprotein	-4.05759	0.120705	0.134529	3.74064	-3.22542	0.222524	4.05759		At3g11290	3535616	3537849	Complement	F11B9.20	expressed protein	6.38595	-2.50522	0.402299	-3.40524	2.46363	-1.79475	6.38595
At5g02890	670063	671467	Complement	F9G14.200	transferase family protein	-4.04768	2.09577	0.340749	1.21095	-1.33502	2.14102	4.04768		At3g14020	4642975	4644308	sense	MDC16.15	CCAAT-binding transcriptionfactor (CBF-B/NF-YA) family protein	6.38193	-2.69851	-2.88543	0.283432	2.18814	-5.54978	6.38193
At5g44670	18036132	18038612	Complement	K15C23.12	expressed protein	-4.03698	1.5618	1.17607	0.966322	-1.86725	2.44385	4.03698		At5g25930	9050797	9053981	sense	T1N24.22	leucine-rich repeat familyprotein / protein kinase family protein	6.37944	-0.743986	-1.25545	-3.24517	4.07218	-1.76422	6.37944
At1g26450	9148697	9150237	Complement	T1K7.18	beta-13-glucanase-related	-4.02878	2.38227	0.915778	0.330771	-1.07729	2.99354	4.02878		At4g31500	15273477	15275316	Complement	F3L17.70	cytochrome P450 83B1 (CYP83B1)	6.37742	-2.85902	-1.28195	-1.17867	2.15385	-3.77466	6.37742
At2g26910	11488701	11495264	sense	F12C20.5	ABC transporter family protein	-4.01065	1.43115	0.295237	1.9241	-1.89839	1.5164	4.01065		At2g46690	19187800	19188537	sense	T3A4.7	auxin-responsive family protein	6.36923	-1.65767	-1.693	-1.67181	3.01986	-3.05897	6.36923
At2g29660	12685967	12687744	sense	T27A16.24	zinc finger (C2H2 type) familyprotein	-4.00938	1.44098	1.2134	1.02534	-1.9564	2.36509	4.00938		At1g32350	11666957	11668670	Complement	F5D14.11	alternative oxidase putative	6.36206	-1.72618	-1.08593	-2.46734	3.14753	-2.50757	6.36206
At5g65310	26119186	26121840	Complement	MNA5.4	homeobox-leucine zipper protein 5(HB-5) / HD-ZIP transcription factor 5	-4.00028	0.788174	0.673684	2.17078	-2.48094	1.28662	4.00028		At4g02410	1059889	1062153	Complement	T14P8.3	lectin protein kinase familyprotein	6.3517	0.150945	-3.31559	-2.18554	5.30422	-2.66875	6.3517
At1g72230	27191728	27192906	sense	T9N14.17	plastocyanin-likedomain-containing protein	-3.99467	0.18791	0.42728	3.19153	-3.10748	0.535962	3.99467		At4g04490	2231955	2234636	Complement	T26N6.10	protein kinase family protein	6.33112	-0.884063	-1.72418	-2.47383	3.86417	-2.3213	6.33112
At5g18670	6225958	6228134	sense	T1A4.50	beta-amylase putative (BMY3) /14-alpha-D-glucan maltohydrolase putative	-3.97779	0.243152	3.06382	0.425587	-3.032	2.86079	3.97779		At3g48770	18090246	18097802	Complement	T21J18.40	hypothetical protein	6.32728	-1.21933	-1.41842	-2.24293	3.3429	-2.3729	6.32728
At5g11550	3708010	3709247	Complement	F15N18.140	expressed protein	-3.95553	0.336903	1.18611	2.11524	-2.9346	1.3312	3.95553		At2g25440	10833814	10836481	sense	F13B15.10	leucine-rich repeat familyprotein	6.31845	-1.53682	-1.30429	-2.16658	3.10028	-2.55971	6.31845
At1g17140	5856257	5858525	Complement	F20D23.32	tropomyosin-related	-3.95166	1.90002	1.17699	0.552161	-1.50069	2.76667	3.95166		At4g08850	5636486	5640633	Complement	T32A17.160	leucine-rich repeat familyprotein / protein kinase family protein	6.26703	-1.13613	-2.59332	-1.48323	3.69044	-3.36283	6.26703
At5g19090	6387912	6390026	sense	T16G12.130	heavy-metal-associateddomain-containing protein	-3.95117	0.790176	1.15456	1.67983	-2.49825	1.71477	3.95117		At2g24160	10275088	10277692	Complement	F27D4.7	pseudogene leucine rich repeatprotein familycontains leucine rich-repeat domains Pfam:PF00560INTERPRO:IPR001611	6.25211	-1.61875	-2.5202	-0.799871	2.93498	-3.88134	6.25211
At3g55390	20545592	20546658	sense	T22E16.50	integral membrane familyprotein	-3.95019	0.114502	1.64277	1.90854	-3.18839	1.5233	3.95019		At1g21525	7537076	7537638	Complement	F24J8.29	expressed protein	6.24479	-1.73234	-1.24725	-1.32112	2.31544	-2.77674	6.24479
At3g29330	11258939	11260290	Complement	MUO10.3	expressed protein	-3.93068	2.12288	1.12108	0.330193	-1.25502	2.94566	3.93068		At4g33010	15926673	15931335	Complement	F26P21.130	glycine dehydrogenase[decarboxylating] putative / glycine decarboxylaseputative / glycine cleavage system P-protein putative	6.22957	-2.18435	-3.62372	0.596582	2.44524	-5.93347	6.22957
At5g37500	14906923	14912134	Complement	MPA22.4	guard cell outward rectifying K+channel (GORK)	-3.92888	1.67938	0.187141	1.66942	-1.58132	1.63561	3.92888		At2g47800	19582014	19587647	sense	F17A22.19	glutathione-conjugatetransporter (MRP4)	6.20861	-1.45109	0.130869	-4.12506	3.27141	-1.14843	6.20861
At4g03190	1404445	1407139	Complement	F4C21.11	F-box family protein (FBL18)	-3.92574	1.54865	-0.270839	2.42139	-1.79215	1.10769	3.92574		At3g60110	22208802	22212426	sense	T2O9.90	DNA-bindingbromodomain-containing protein	6.20268	-2.02733	0.592202	-3.98046	2.68555	-1.22597	6.20268
At5g65640	26254285	26256310	sense	K21L13.16	basic helix-loop-helix (bHLH)family protein	-3.91579	2.21418	-1.9752	3.64666	-1.19175	0.201865	3.91579		At1g63530	23567317	23568899	sense	F2K11.11	hypothetical protein	6.16005	-1.07689	-1.50452	-2.40309	3.53673	-2.30576	6.16005
At4g01080	466391	468293	Complement	F2N1.14	expressed protein	-3.91377	-0.00222389	2.69294	0.974245	-3.27396	2.30138	3.91377		At2g32160	13669296	13673346	sense	F22D22.9	expressed protein	6.14958	-0.187626	-0.697817	-4.71983	4.71789	-0.770384	6.14958
At5g24580	8410261	8412268	Complement	K18P6.11	copper-binding family protein	-3.88836	0.251259	2.31012	1.07925	-3.00876	2.2256	3.88836		At1g66570	24838972	24840905	Complement	T12I7.2	sucrose transporter putative /sucrose-proton symporter putative	6.14794	-1.34431	-1.61086	-1.83038	3.132	-2.68114	6.14794
At5g08640	2803959	2805448	sense	MAH20.20	flavonol synthase 1 (FLS1)	-3.88686	0.72221	-0.48583	3.61006	-2.5171	0.207896	3.88686		At3g24890	9098132	9098763	sense	K7P8.18	synaptobrevin-related	6.14595	-1.29579	-1.59046	-1.86186	3.14762	-2.61725	6.14595
At3g50000	18545470	18547878	sense	F3A4.80	casein kinase II alpha chain 2	-3.88618	2.08271	-1.01474	2.62259	-1.26833	0.896563	3.88618		At1g51805	19224646	19229358	Complement	F19C24.2	leucine-rich repeat proteinkinase putative	6.13531	0.221635	-4.60742	-1.03201	5.20746	-3.54398	6.13531
At3g59390	21957095	21959349	sense	F25L23.250	expressed protein	-3.87495	1.90612	0.0468414	1.61664	-1.40915	1.70258	3.87495		At5g17650	5816700	5818349	Complement	K10A8.130	glycine/proline-rich protein	6.13362	-0.531662	-0.0723498	-5.11264	4.2465	-0.527615	6.13362
At1g65010	24153577	24157937	sense	F13O11.30	expressed protein	-3.86395	0.630597	-0.317562	3.49763	-2.58327	0.275622	3.86395		At4g39950	18525240	18527573	sense	T5J17.120	cytochrome P450 79B2 putative(CYP79B2)	6.13268	-3.61026	-2.11706	0.460804	1.40335	-5.63298	6.13268
At3g13620	4450191	4452594	Complement	K20M4.6	amino acid permease familyprotein	-3.85527	0.659207	3.65434	-0.527291	-2.54503	3.83525	3.85527		At3g15790	5343216	5344707	sense	MSJ11.19	methyl-CpG-bindingdomain-containing protein	6.13201	-1.40138	-2.11957	-1.43733	3.21421	-3.21092	6.13201
At2g35880	15070067	15072930	Complement	F11F19.21	expressed protein	-3.85503	1.32947	1.58128	0.618302	-1.9172	2.61758	3.85503		At1g70580	26616295	26619732	sense	F24J13.15	glutamate:glyoxylateaminotransferase 2 (GGT2)	6.13009	-1.14279	-1.17544	-2.61838	3.4103	-2.06556	6.13009
At4g18030	10012373	10015688	Complement	T6K21.210	dehydration-responsive familyprotein	-3.8319	2.33688	-0.883601	2.14373	-1.00827	1.20834	3.8319		At1g74360	27957892	27962176	sense	F1M20.4	leucine-rich repeat transmembraneprotein kinase putative	6.12985	-0.819805	-1.72971	-2.4984	3.86548	-2.26187	6.12985
At1g51940	19299598	19302787	Complement	T14L22.13	protein kinase family protein /peptidoglycan-binding LysM domain-containing protein	-3.8288	1.95373	0.573845	0.912911	-1.2854	2.24827	3.8288		At3g44410	16066038	16066757	Complement	T22K7.90	pseudogene disease resistenceprotein putativesimilar to disease resistance protein RPP1-WsB[Arabidopsis thaliana] gi|3860165|gb|AAC72978	6.12678	-0.671384	-2.44147	-1.88224	3.99795	-2.76111	6.12678
At5g14700	4740255	4743449	Complement	T15N1.190	cinnamoyl-CoAreductase-related	-3.81135	2.55431	-0.83119	1.81003	-0.781166	1.40851	3.81135		At2g05520	2026159	2027096	sense	T20G20.13	glycine-rich protein (GRP)	6.12478	-1.55058	-3.12382	-0.410202	3.07053	-4.39114	6.12478
At3g11740	3712433	3713395	sense	F26K24.3	expressed protein	-3.80889	1.49173	1.17507	0.775455	-1.69732	2.40108	3.80889		At1g23140	8202351	8203201	Complement	T26J12.9	C2 domain-containing protein	6.12361	-1.50807	-1.73739	-1.59642	2.99624	-2.96137	6.12361
At1g16860	5767293	5770552	sense	F17F16.16	merozoite surfaceprotein-related	-3.7998	0.443976	2.9636	0.183309	-2.69523	2.99172	3.7998		At1g64780	24064433	24066293	Complement	F13O11.9	ammonium transporter 1 member 2(AMT1.2)	6.12122	-1.47032	-2.24027	-1.15835	3.04373	-3.42322	6.12122
At4g39400	18324655	18328820	sense	F23K16.30	brassinosteroid insensitive 1(BRI1)	-3.792	1.30249	0.341988	1.86716	-1.89265	1.44487	3.792		At4g23990	12456534	12460763	sense	T32A16.160	cellulose synthase familyprotein	6.10743	-2.356	-2.84035	0.137156	2.28555	-5.10859	6.10743
At1g53730	20065398	20069369	sense	F22G10.31	leucine-rich repeattransmembrane protein kinase putative	-3.7877	2.68508	-0.36195	1.09973	-0.609536	1.92479	3.7877		At5g52450	21306125	21309088	Complement	K24M7.20	MATE efflux protein-related	6.09711	-2.86508	0.0555114	-2.08939	1.71089	-2.40378	6.09711
At3g06720	2120330	2124137	sense	F3E22.14	importin alpha-1 subunitputative (IMPA1)	-3.78439	2.54239	0.364533	0.623026	-0.847359	2.55817	3.78439		At3g50220	18628406	18629711	Complement	F11C1.60	expressed protein	6.07387	-1.61587	-1.44912	-1.95253	3.03122	-2.76086	6.07387
At5g43700	17567460	17568808	sense	MQO24.5	auxin-responsive protein /indoleacetic acid-induced protein 4 (IAA4) / auxin-inducedprotein (AUX2-11)	-3.77706	1.03144	2.21961	0.251829	-2.13731	2.92158	3.77706		At5g59845	24128550	24129238	sense	MMN10.7	gibberellin-regulated familyprotein	6.07377	-1.4125	-1.48725	-2.02891	3.16362	-2.61023	6.07377
At1g18620	6410025	6414443	sense	F25I16.3	expressed protein	-3.76955	2.93809	-0.0251493	0.677869	-0.555138	2.50943	3.76955		At2g24180	10288927	10290815	sense	F27D4.9	cytochrome P450 family protein	6.06159	-1.13703	-1.33478	-2.45571	3.40768	-2.20649	6.06159
At1g75110	28197776	28199594	Complement	F9E10.4	expressed protein	-3.76287	1.00475	2.32817	0.0729329	-2.05209	3.05133	3.76287		At2g33590	14231344	14233678	sense	F4P9.36	cinnamoyl-CoA reductase family	6.06024	-1.40453	-1.3027	-2.14612	3.10228	-2.43271	6.06024
At3g15070	5069620	5073324	Complement	K15M2.22	zinc finger (C3HC4-type RINGfinger) family protein	-3.75154	0.35682	0.972524	2.2055	-2.79313	1.16042	3.75154		At5g17330	5711070	5715077	sense	MKP11.30	glutamate decarboxylase 1 (GAD1)	6.0408	-2.55304	-1.2423	-1.19786	2.13681	-3.46419	6.0408
At2g41230	17202004	17202752	Complement	F13H10.22	expressed protein	-3.74722	1.16717	0.46762	1.79088	-1.95322	1.43803	3.74722		At1g65690	24435096	24436616	Complement	F1E22.7	harpin-induced protein-related /HIN1-related / harpin-responsive protein-related	6.03968	-2.19192	-1.30158	-1.48882	2.45742	-3.17361	6.03968
At1g01620	225722	227302	Complement	F22L4.16	plasma membrane intrinsicprotein 1C (PIP1C) / aquaporin PIP1.3 (PIP1.3) /transmembrane protein B (TMPB)	-3.73688	2.66751	-0.34069	1.18251	-0.703173	1.97399	3.73688		At4g21120	11270056	11273982	sense	F7J7.60	amino acid permease familyprotein	6.02857	-1.80565	-0.950884	-2.27884	2.8376	-2.45887	6.02857
At5g16440	5371772	5373733	sense	MQK4.17	isopentenyl-diphosphatedelta-isomerase I / isopentenyl diphosphate:dimethylallyldiphosphate isomerase I (IPP1)	-3.72934	2.99065	0.294411	0.258137	-0.475715	2.86823	3.72934		At1g52870	19689415	19691531	sense	F14G24.14	peroxisomal membraneprotein-related	6.00136	0.150564	-1.51515	-3.95509	5.0701	-1.17368	6.00136
At3g14200	4712581	4714660	Complement	MAG2.19	DNAJ heat shock N-terminaldomain-containing protein	-3.726	2.50194	0.747409	0.246818	-0.858352	2.89838	3.726		At1g64900	24116878	24118647	sense	F13O11.20	cytochrome P450 putative	5.99842	-0.988855	-1.8827	-2.12278	3.63853	-2.56176	5.99842
At3g03150	727561	729467	Complement	T17B22.16	expressed protein	-3.7036	0.947461	0.180787	2.34324	-2.14359	0.988203	3.7036		At5g39090	15660831	15662344	sense	MXF12.100	transferase family protein	5.98226	-0.761083	-2.43591	-1.77231	3.86219	-2.84283	5.98226
At1g41830	15606058	15610302	Complement	F5A13.5	multi-copper oxidase type Ifamily protein	-3.65759	0.351803	0.770767	2.28398	-2.68562	0.980483	3.65759		At5g27420	9684075	9685564	sense	F21A20.130	zinc finger (C3HC4-type RINGfinger) family protein	5.98198	-1.49888	-1.22194	-2.23161	3.0741	-2.43473	5.98198
At5g45340	18385886	18388218	Complement	K9E15.12	cytochrome P450 family protein	-3.64366	3.58494	0.0511873	-0.0337499	-0.0154501	3.11828	3.64366		At2g37710	15821796	15824082	Complement	F13M22.21	lectin protein kinaseputative	5.98168	-2.1107	-2.25823	-0.522386	2.42561	-4.13535	5.98168
At4g16980	9556997	9557831	sense	FCAALL.162	arabinogalactan-proteinfamily	-3.61934	1.65612	0.119121	1.6096	-1.47101	1.55143	3.61934		At4g34120	16341094	16343651	sense	F28A23.120	CBS domain-containing protein	5.97447	-0.800107	-2.02706	-1.93167	3.65854	-2.52524	5.97447
At1g79700	29995164	29998617	Complement	F20B17.12	ovule development proteinputative	-3.6179	0.917556	1.75332	0.614155	-2.07005	2.39824	3.6179		At3g21465	7560756	7563433	sense	MHC9.15	expressed protein	5.97022	-2.07744	-2.2436	-0.491975	2.39162	-4.11734	5.97022
At4g14560	8361061	8361982	sense	FCAALL.409	auxin-responsive protein /indoleacetic acid-induced protein 1 (IAA1)	-3.61405	1.17482	2.42233	-0.208941	-1.87411	3.27522	3.61405		At5g28020	10026187	10028584	Complement	F15F15.90	cysteine synthase putative /O-acetylserine (thiol)-lyase putative / O-acetylserinesulfhydrylase putative	5.94776	-2.20993	-2.6192	0.0767981	2.15103	-4.82675	5.94776
At4g36380	17187667	17192320	Complement	AP22.10	cytochrome P450 90C1 (CYP90C1) /rotundifolia3 (ROT3)	-3.60924	2.12738	-0.124113	1.32808	-1.01904	1.72131	3.60924		At2g03760	1149334	1150660	Complement	F19B11.21	steroid sulfotransferaseputative	5.92112	-0.35472	-1.34256	-3.48099	4.37268	-1.48133	5.92112
At4g39510	18368797	18370646	Complement	F23K16.140	cytochrome P450 familyprotein	-3.58972	0.158286	0.449083	2.87056	-2.8573	0.528535	3.58972		At2g24850	10589909	10592295	Complement	F27C12.23	aminotransferase putative	5.91647	-3.07127	1.59236	-3.79188	1.61334	-1.14974	5.91647
At1g17840	6142603	6146514	sense	F2H15.7	ABC transporter family protein	-3.58876	2.16144	-1.24313	2.52409	-0.990474	0.755567	3.58876		At3g04000	1035507	1036679	sense	T11I18.11	short-chaindehydrogenase/reductase (SDR) family protein	5.89764	-1.39776	-2.87229	-0.759849	3.20135	-3.91319	5.89764
At3g12090	3852151	3853726	Complement	T21B14.9	senescence-associated familyprotein	-3.56112	1.27458	0.0965978	1.94702	-1.73125	1.19979	3.56112		At5g52810	21416557	21417829	sense	F6N7.8	ornithinecyclodeaminase/mu-crystallin family protein	5.89048	-1.33734	0.228152	-4.16183	3.19437	-0.963143	5.89048
At5g11420	3644599	3647296	sense	F2I11.1	expressed protein	-8.54372	4.68241	3.36198	-1.22365	-1.71657	9.22061	0		At5g16080	5252318	5253621	Complement	F1N13.220	expressed protein	5.88791	-0.74946	-0.146389	-4.48771	3.85874	-0.783268	5.88791
At4g32460	15662272	15664983	Complement	F8B4.160	expressed protein	-8.20748	4.71915	3.19809	-1.30784	-1.50839	9.24018	0		At3g47450	17494053	17497332	Complement	T21L8.200	expressed protein	5.88428	-1.60083	-1.14286	-2.22702	2.98531	-2.44783	5.88428
At1g52400	19518820	19521829	sense	F19K6.15	glycosyl hydrolase family 1protein / beta-glucosidase putative (BG1)	-8.20532	-1.13815	2.49341	5.55429	-8.77042	1.10336	0		At3g23340	8350810	8353966	sense	MLM24.21	casein kinase putative	5.87486	-0.930709	-2.95109	-0.789543	3.35214	-3.55591	5.87486
At3g20790	7268768	7271517	sense	MOE17.10	oxidoreductase family protein	-7.98139	3.91124	3.24534	-0.963926	-1.83572	8.19674	0		At2g18700	8116125	8119092	sense	MSF3.8	glycosyl transferase family 20protein / trehalose-phosphatase family protein	5.8739	-0.0848071	-1.12122	-3.96777	4.61324	-1.04623	5.8739
At2g40610	16955941	16957635	Complement	T2P4.4	expansin putative (EXP8)	-7.10701	5.13567	4.78943	-3.37274	-0.978112	14.457	0		At1g08450	2667836	2671822	Complement	T27G7.13	calreticulin 3 (CRT3)	5.8691	-0.370174	-2.08364	-2.03874	3.99203	-2.15194	5.8691
At5g51950	21123171	21125831	Complement	MSG15.3	glucose-methanol-choline (GMC)oxidoreductase family protein	-6.81133	0.122838	6.97582	-0.207727	-5.31126	5.79696	0		At3g63350	23410443	23411787	sense	F16M2.200	heat shock transcription factorfamily protein	5.85983	-0.117012	-1.43101	-3.57289	4.59143	-1.34296	5.85983
At2g06850	2763555	2765717	sense	T9F8.4	xyloglucan:xyloglucosyltransferase / xyloglucan endotransglycosylase /endo-xyloglucan transferase (EXT) (EXGT-A1)	-6.60831	4.40277	3.61199	-2.10897	-1.15541	9.27479	0		At3g20310	7084812	7086811	Complement	MQC12.13	ethylene-responsiveelement-binding family protein	5.8587	-0.818917	-1.2125	-2.63346	3.50097	-1.8033	5.8587
At3g01980	327462	329029	Complement	F1C9.24	short-chaindehydrogenase/reductase (SDR) family protein	-6.47524	4.27644	4.16824	-2.58743	-1.12756	11.0144	0		At2g20880	8993054	8994344	sense	F5H14.15	AP2 domain-containingtranscription factor putative	5.85812	-1.48482	-1.12572	-2.13942	2.89578	-2.34239	5.85812
At4g16515	9305278	9305786	Complement	FCAALL.224	expressed protein	-6.44534	3.25565	3.72158	-1.35339	-1.86186	7.42451	0		At4g21380	11388936	11393237	Complement	T6K22.110	S-locus protein kinaseputative (ARK3)	5.84755	-1.55182	-1.61227	-1.61716	2.89122	-2.87027	5.84755
At1g24020	8500466	8501504	Complement	T23E23.28	Bet v I allergen familyprotein	-6.26311	-1.56119	0.209625	9.82405	-7.65674	-1.16814	0		At3g50900	18929000	18929599	sense	F18B3.180	expressed protein	5.84421	-2.59158	-0.539193	-1.82148	2.03899	-2.76955	5.84421
At3g19790	6874943	6875446	Complement	MMB12.25	hypothetical protein	-6.25272	-0.58377	-0.335598	8.31123	-5.91239	-0.802157	0		At4g01700	732010	733510	Complement	T15B16.5	chitinase putative	5.83844	-1.34375	-2.06602	-1.37727	3.09682	-3.10309	5.83844
At2g39330	16426674	16428928	Complement	T16B24.3	jacalin lectin family protein	-6.23858	-2.21527	3.53425	4.47362	-9.21685	0.976186	0		At5g18310	6061703	6063034	sense	F20L16.30	expressed protein	5.82234	-0.392876	-3.25724	-1.29842	4.17417	-3.18516	5.82234
At1g70830	26713609	26715096	Complement	F15H11.8	Bet v I allergen family protein	-6.23216	-2.40018	4.40949	3.57357	-14.3864	1.25372	0		At5g04950	1457646	1458891	Complement	MUG13.19	nicotianamine synthaseputative	5.82073	-1.42187	-1.67059	-1.67504	2.99499	-2.79948	5.82073
At1g80280	30188433	30191478	Complement	F5I6.3	hydrolase alpha/beta fold familyprotein	-6.0562	-2.05161	3.85828	3.74808	-8.8972	1.31579	0		At2g41120	17147973	17149497	Complement	T3K9.11	expressed protein	5.81713	-0.908525	-0.831566	-3.16156	3.52248	-1.53526	5.81713
At3g06980	2201473	2204839	sense	F17A9.13	DEAD/DEAH box helicaseputative	-6.02458	5.52895	2.53636	-2.28847	-0.213009	9.18171	0		At3g47730	17605045	17609881	Complement	T23J7.60	ABC transporter family protein	5.81201	-1.94839	0.0783076	-3.14242	2.5513	-1.62276	5.81201
At5g48900	19842363	19846318	sense	K24G6.1	pectate lyase family protein	-5.91349	4.93941	4.5831	-3.83166	-0.523341	12.7957	0		At3g24490	8911029	8912182	sense	MOB24.1	expressed protein	5.79631	-0.0994109	-2.83615	-1.8936	4.49637	-2.51996	5.79631
At3g43930	15771935	15773667	Complement	T15B3.70	expressed protein	-5.83396	-2.40846	3.649	4.19936	-10.2778	0.865282	0		At5g48410	19637493	19640651	sense	MJE7.4	glutamate receptor family protein(GLR1.3)	5.79158	-0.564805	-1.13139	-3.26389	3.95334	-1.4889	5.79158
At2g28630	12282396	12284322	Complement	T8O18.8	beta-ketoacyl-CoA synthase familyprotein	-5.72222	3.1687	6.1325	-3.52209	-1.61482	11.6079	0		At3g62930	23272513	23272821	Complement	T20O10.30	glutaredoxin family protein	5.78764	-0.339447	0.0566135	-5.37597	4.29913	-0.247561	5.78764
At3g47230	17403084	17404684	Complement	F13I12.280	expressed protein	-5.70185	-0.806302	9.05708	-0.478571	-5.83311	5.31986	0		At5g35735	13917982	13920227	Complement	MXH1.11	auxin-responsive family protein	5.78202	-2.19383	-3.06811	0.350355	2.26581	-5.17929	5.78202
At2g45580	18789400	18791417	Complement	F17K2.11	cytochrome P450 family protein	-5.65662	4.18403	4.57292	-3.34401	-0.830785	11.2411	0		At3g22020	7756584	7757453	sense	MZN24.20	receptor-like proteinkinase-related	5.77961	-1.51129	-1.59825	-1.64022	2.89414	-2.81664	5.77961
At5g56540	22910377	22910868	sense	MKN22.5	arabinogalactan-protein (AGP14)	-5.65364	6.44946	2.94047	-3.54174	0.405254	12.181	0		At5g42380	16959804	16960594	Complement	MDH9.7	calmodulin-related proteinputative	5.77881	-1.38487	-1.53624	-1.79104	2.98291	-2.63774	5.77881
At4g36540	17243586	17245299	sense	AP22.3	basic helix-loop-helix (bHLH)family protein	-5.61128	4.5279	1.36875	-0.731301	-0.547285	5.61848	0		At1g34750	12736073	12737705	Complement	F11O6.14	protein phosphatase 2C putative/ PP2C putative	5.763	-1.45112	-0.972825	-2.17862	2.79345	-2.17174	5.763
At1g14290	4880046	4881947	Complement	F14L17.5	acid phosphatase putative	-5.60469	2.11757	3.76691	-0.902892	-2.27251	5.89862	0		At3g49750	18461418	18462479	Complement	T16K5.100	leucine-rich repeat familyprotein	5.76255	-0.465979	0.0259496	-5.09323	4.14332	-0.384089	5.76255
At3g16440	5585950	5587753	sense	MDC8.16	jacalin lectin family protein	-5.45594	-1.44544	1.15239	6.06285	-6.70691	-0.251879	0		At5g16010	5227927	5229119	sense	F1N13.150	3-oxo-5-alpha-steroid4-dehydrogenase family protein / steroid 5-alpha-reductasefamily protein	5.75452	-1.71481	-1.95047	-1.14139	2.74261	-3.35746	5.75452
At1g50010	18521282	18523668	sense	F2J10.11	tubulin alpha-2/alpha-4 chain(TUA2)	-5.41638	-2.27411	2.97977	4.50251	-8.7264	0.514028	0		At4g05020	2572693	2576593	sense	T32N4.4	NADH dehydrogenase-related	5.73536	-0.397922	-1.11788	-3.37568	4.07965	-1.32552	5.73536
At3g22090	7782965	7783564	sense	MZN24.30	expressed protein	-5.40659	2.67099	-2.91289	5.80437	-1.76271	-0.167839	0		At5g05340	1578952	1580876	Complement	K18I23.14	peroxidase putative	5.73317	-3.44806	-0.0729639	-1.36061	1.21847	-3.02647	5.73317
At1g56580	21201924	21202621	Complement	F25P12.97	expressed protein	-5.29701	-2.95957	2.7337	5.74309	-10.5252	-0.181562	0		At4g37310	17555921	17558887	Complement	AP22.74	cytochrome P450 putative	5.73211	-1.11768	-0.429837	-3.53488	3.40214	-1.35689	5.73211
At1g03870	982508	983539	Complement	F21M11.20	fasciclin-likearabinogalactan-protein (FLA9)	-5.2963	2.61614	3.82359	-1.5953	-1.6885	6.82184	0		At2g41730	17416541	17417015	sense	T11A7.17	expressed protein	5.69895	-1.4793	-1.25401	-1.46609	2.47378	-2.51054	5.69895
At1g69530	26145499	26147163	sense	F10D13.18	expansin putative (EXP1)	-5.26909	4.06962	2.5976	-1.84445	-0.594783	7.72393	0		At5g01540	210978	213471	Complement	F7A7.60	lectin protein kinase putative	5.69515	0.275415	-2.44986	-2.85991	5.02719	-1.84697	5.69515
At4g25960	13177475	13183564	sense	F14M19.5	multidrug resistanceP-glycoprotein putative	-5.26513	-0.527515	0.114821	6.1086	-5.02024	-0.361393	0		At1g51800	19217817	19221639	sense	F19C24.3	leucine-rich repeat proteinkinase putative	5.68946	-1.58384	-1.44122	-1.73734	2.82346	-2.7273	5.68946
At5g14920	4826546	4827983	sense	F2G14.40	gibberellin-regulated familyprotein	-5.25016	-0.356209	0.364398	5.29951	-4.78091	0.00512733	0		At2g21640	9261539	9262705	sense	F2G1.9	expressed protein	5.68831	-1.88956	-1.58822	-1.24847	2.50895	-3.17809	5.68831
At5g10430	3277533	3278314	Complement	F12B17.220	arabinogalactan-protein(AGP4)	-5.18908	2.54815	3.30132	-1.15352	-1.71704	5.87807	0		At3g50740	18866142	18867865	Complement	T3A5.120	UDP-glucoronosyl/UDP-glucosyltransferase family protein	5.66856	-3.84513	0.924149	-2.23863	1.07184	-2.37107	5.66856
At5g48460	19653327	19656714	Complement	MJE7.9	fimbrin-like protein putative	-5.17115	2.79529	3.87812	-1.88934	-1.47309	7.29651	0		At1g17420	5977404	5981473	sense	F1L3.11	lipoxygenase putative	5.66766	-0.444019	-1.40959	-3.05651	4.05483	-1.62291	5.66766
At3g23020	8177222	8179750	Complement	MXC7.5	pentatricopeptide (PPR)repeat-containing protein	-5.13347	5.17504	-0.383923	0.337818	0.0428004	3.80902	0		At2g34810	14692335	14694141	sense	F19I3.4	FAD-binding domain-containingprotein	5.65359	-0.994816	-4.33158	0.142727	3.47985	-4.83286	5.65359
At5g44620	18015006	18016785	Complement	K15C23.6	cytochrome P450 family protein	-5.09667	-0.100169	-1.72203	9.08909	-4.34558	-1.57758	0		At3g54920	20356077	20359507	sense	F28P10.100	pectate lyase putative /powdery mildew susceptibility protein (PMR6)	5.64129	-1.04464	-1.40851	-2.26013	3.30111	-2.18558	5.64129
At1g12090	4089845	4090723	Complement	F12F1.3	protease inhibitor/seedstorage/lipid transfer protein (LTP) family protein	-5.0599	7.80093	-2.01343	0.603791	1.19029	3.50714	0		At1g10585	3493958	3495136	Complement	T10O24.22	expressed protein	5.62222	-1.55142	-1.11757	-1.60652	2.43303	-2.42992	5.62222
At2g39010	16298555	16301112	sense	T7F6.18	aquaporin putative	-5.05129	2.75819	2.77306	-1.00849	-1.43519	5.56072	0		At3g51830	19231126	19236257	sense	ATEM1.8	phosphoinositide phosphatasefamily protein	5.61083	-1.30559	0.112784	-3.65269	2.90183	-1.03462	5.61083
At3g51270	19044830	19047751	sense	F24M12.310	RIO1 family protein	-5.05105	1.86969	5.54125	-2.22198	-2.19405	7.77165	0		At4g13180	7657192	7658193	Complement	F17N18.70	short-chaindehydrogenase/reductase (SDR) family protein	5.60725	-0.629866	-2.28073	-1.95239	3.85674	-2.56469	5.60725
At5g64330	25744563	25748328	sense	MSJ1.17	non-phototropic hypocotyl 3(NPH3)	-4.99607	3.71436	4.67838	-3.52519	-0.763584	10.9548	0		At2g41190	17174357	17177485	Complement	T3K9.4	amino acid transporter familyprotein	5.60312	-1.43332	-1.56668	-1.59196	2.82285	-2.71807	5.60312
At1g14890	5137048	5137926	sense	F10B6.30	invertase/pectin methylesteraseinhibitor family protein	-4.97733	0.762305	-1.01496	5.45203	-3.26446	-0.210368	0		At5g64410	25768071	25772277	Complement	MSJ1.25	oligopeptide transporter OPTfamily protein	5.60273	-0.148535	-2.49425	-2.06304	4.29346	-2.28342	5.60273
At2g02780	781846	784645	Complement	T20F6.8	leucine-rich repeat transmembraneprotein kinase putative	-4.97209	3.43284	2.06217	-1.07548	-0.809023	5.75624	0		At1g64950	24131224	24133121	sense	F13O11.25	cytochrome P450 putative	5.6022	-0.361029	-0.403894	-4.08819	3.82852	-0.668749	5.6022
At3g55830	20726080	20729017	sense	F27K19.10	glycosyltransferase familyprotein 47	-4.96092	4.06202	5.13753	-4.28453	-0.527577	12.9956	0		At1g76520	28720026	28722308	sense	F14G6.12	auxin efflux carrier familyprotein	5.60026	-1.18312	-2.47244	-1.0997	3.1885	-3.31262	5.60026
At1g25230	8840394	8842300	Complement	F4F7.38	purple acid phosphatase familyprotein	-4.93945	3.59721	4.45494	-3.25978	-0.760505	11.271	0		At5g05300	1570103	1570411	Complement	K18I23.10	expressed protein	5.57626	-1.40276	-1.22756	-1.97201	2.85239	-2.36005	5.57626
At3g26935	9934238	9936455	Complement	MQP17.8	zinc finger (DHHC type) familyprotein	-4.93085	2.71695	3.54793	-1.67171	-1.45385	6.41021	0		At3g16180	5481331	5485100	Complement	MSL1.22	proton-dependent oligopeptidetransport (POT) family protein	5.57191	0.446604	-2.75341	-2.41907	5.14311	-1.90972	5.57191
At5g45950	18651361	18653926	sense	K15I22.15	GDSL-motif lipase/hydrolasefamily protein	-4.92079	4.78073	3.15065	-3.09995	-0.0588214	9.26907	0		At1g65480	24335091	24337597	sense	F5I14.3	flowering locus T protein (FT)	5.57024	-2.43554	-1.41355	-0.899633	2.02114	-3.52452	5.57024
At1g04820	1356190	1358374	Complement	F13M7.19	tubulin alpha-2/alpha-4 chain(TUA4)	-4.91088	-0.195485	-0.0314046	5.39764	-4.27794	-0.198048	0		At4g28140	13974697	13975914	Complement	F26K10.20	AP2 domain-containingtranscription factor putative	5.57003	-1.54594	-1.1484	-1.96193	2.74954	-2.41587	5.57003
At1g63690	23622041	23626059	sense	F24D7.12	protease-associated (PA)domain-containing protein	-4.88791	3.09096	2.07966	-0.707327	-1.15851	4.93852	0		At4g22260	11769768	11772526	Complement	T10I14.90	alternative oxidase putative /immutans protein (IM)	5.55259	0.0313841	-1.59483	-3.07284	4.45113	-1.34609	5.55259
At1g64660	24032581	24034443	sense	F1N19.23	Cys/Met metabolismpyridoxal-phosphate-dependent enzyme family protein	-4.857	3.22883	2.32573	-1.11007	-1.00604	5.49297	0		At1g16260	5559702	5562012	Complement	F3O9.6	protein kinase family protein	5.55196	-2.50258	-1.79225	-0.35748	1.86248	-4.0537	5.55196
At2g05990	2322219	2325143	sense	T6P5.19	enoyl-[acyl-carrier protein]reductase [NADH] chloroplast putative / NADH-dependentenoyl-ACP reductase putative	-4.84578	-0.754646	-0.168609	6.65472	-4.98151	-0.806961	0		At5g13080	4149755	4151153	Complement	T19L5.40	WRKY family transcriptionfactor	5.53763	-0.130217	-0.904797	-3.97935	4.34965	-0.898903	5.53763
At2g02850	826542	827785	Complement	T17M13.2	plastocyanin-likedomain-containing protein / plantacyanin putative	-4.84301	-1.22756	-1.02497	10.2106	-5.62164	-1.9917	0		At3g14400	4811539	4815504	Complement	MLN21.18	ubiquitin-specific protease 25(UBP25)	5.53564	-0.309844	-0.644791	-4.01043	4.06219	-0.832861	5.53564
At3g01690	256562	258554	sense	F4P13.23	expressed protein	-4.82995	3.08112	2.35849	-1.0306	-1.09989	5.34977	0		At1g60190	22202068	22204343	sense	T13D8.8	armadillo/beta-catenin repeatfamily protein / U-box domain-containing protein	5.52815	-0.676478	-1.15303	-2.91678	3.64539	-1.6112	5.52815
At4g18970	10389122	10390908	Complement	F13C5.1	GDSL-motif lipase/hydrolasefamily protein	-4.78668	-0.277587	0.0271813	5.27134	-4.30168	-0.218858	0		At2g46650	19158723	19159663	sense	T3A4.3	cytochrome b5 putative	5.51513	-1.23483	-2.30149	-1.00069	2.94904	-3.23888	5.51513
At4g31290	15185997	15188490	sense	F8F16.110	ChaC-like family protein	-4.75858	-1.18036	2.45139	3.01275	-5.85683	0.990816	0		At2g46400	19050487	19051899	Complement	F11C10.9	WRKY family transcriptionfactor	5.51447	-2.57855	-1.02019	-1.18936	1.92551	-3.23635	5.51447
At1g52410	19524403	19529293	sense	F19K6.14	caldesmon-related	-4.71837	-1.63259	0.371455	6.88001	-6.01752	-1.08922	0		At2g38860	16240522	16242313	Complement	T7F6.3	proteaseI (pfpI)-like protein(YLS5)	5.50119	-1.92947	-1.66987	-0.867843	2.24269	-3.34608	5.50119
At1g14280	4877622	4879144	sense	F14L17.4	phytochrome kinase putative	-4.70065	5.33825	2.63026	-3.19186	0.391986	8.73433	0		At5g05730	1719574	1722904	Complement	MJJ3.14	anthranilate synthase alphasubunit component I-1 (ASA1)	5.50025	-0.552655	-2.04037	-2.0272	3.73937	-2.28667	5.50025
At5g17700	5830617	5833903	Complement	MVA3.5	MATE efflux family protein	-4.65616	5.34469	1.17847	-1.6325	0.362046	6.2516	0		At3g52370	19428468	19430760	sense	T25B15.140	beta-Ig-H3 domain-containingprotein / fasciclin domain-containing protein	5.49944	-0.00148787	-1.63257	-3.20656	4.48445	-1.41076	5.49944
At1g01300	116943	118764	sense	F6F3.10	aspartyl protease family protein	-4.62289	-0.689428	-1.26851	9.67436	-4.70698	-1.72455	0		At3g01830	296061	299270	sense	F28J7.16	calmodulin-related proteinputative	5.49023	0.226666	-0.882711	-4.54212	4.79828	-0.564877	5.49023
At5g33370	12619698	12621993	Complement	F19N2.90	GDSL-motif lipase/hydrolasefamily protein	-4.60511	0.819939	-1.27759	5.39416	-2.93573	-0.382302	0		At1g02850	630512	633259	sense	F22D16.15	glycosyl hydrolase family 1protein	5.46618	-2.78648	-1.27703	-0.526895	1.56945	-3.77015	5.46618
At5g39320	15760019	15762171	sense	K3K3.170	UDP-glucose 6-dehydrogenaseputative	-4.55973	-0.831966	-0.158704	6.4994	-4.84151	-0.867302	0		At1g67980	25491377	25492894	sense	T23K23.17	caffeoyl-CoA3-O-methyltransferase putative	5.46591	-1.88758	-0.118797	-2.63732	2.32706	-1.75205	5.46591
At4g20870	11174597	11175889	Complement	T13K14.30	fatty acid hydroxylaseputative	-4.54262	-0.650449	6.11079	-0.268706	-4.57522	4.10704	0		At5g62150	24975467	24975995	sense	MTG10.18	peptidoglycan-binding LysMdomain-containing protein	5.46249	-2.07013	-0.980949	-1.45558	2.14164	-2.75374	5.46249
At1g02070	370257	370967	Complement	T7I23.30	expressed protein	-4.53297	4.51015	1.52831	-1.56172	0.011714	5.81506	0		At1g49050	18154207	18157010	sense	F27J15.15	aspartyl protease familyprotein	5.45658	-0.965936	-1.42338	-2.06828	3.16729	-2.13428	5.45658
At5g65700	26298986	26302473	sense	MPA24.5	leucine-rich repeat transmembraneprotein kinase putative	-4.52738	-0.898915	-0.17175	6.46926	-4.87934	-0.936425	0		At4g17245	9669377	9670017	sense	FCAALL.189	zinc finger (C3HC4-type RINGfinger) family protein	5.44764	-1.44772	-3.87002	0.524461	2.67355	-5.18057	5.44764
At2g26330	11215261	11221049	Complement	T1D16.3	leucine-rich repeat proteinkinase putative (ERECTA)	-4.52714	0.208061	-1.30649	6.58339	-3.52212	-0.943462	0		At1g21270	7444919	7448447	sense	F16F4.5	wall-associated kinase 2 (WAK2)	5.44526	-1.11867	-1.5317	-2.03108	3.19226	-2.36041	5.44526
At2g42900	17861676	17862506	sense	F7D19.10	expressed protein	-4.52115	3.02744	3.40358	-2.15352	-0.947482	6.88521	0		At4g22980	12043985	12045664	Complement	F7H19.160	expressed protein	5.44149	-0.805493	-1.47189	-2.29127	3.4075	-2.02	5.44149
At4g18425	10181345	10182151	Complement	F28J12.6	expressed protein	-4.5151	3.68328	4.92283	-4.13169	-0.521263	10.7328	0		At5g25440	8854842	8856761	Complement	F18G18.180	protein kinase family protein	5.43548	-1.48116	-1.46215	-1.58224	2.71384	-2.65928	5.43548
At4g09890	6218393	6218923	sense	T5L19.20	expressed protein	-4.47674	3.3122	1.56539	-0.667117	-0.768159	4.5224	0		At2g29120	12518369	12522892	Complement	T9I4.20	glutamate receptor family protein(GLR2.7)	5.43009	-1.21605	-1.36341	-1.87319	2.90328	-2.31745	5.43009
At5g02190	435231	436895	sense	T7H20.240	aspartyl protease familyprotein	-4.46325	-0.833738	1.42261	3.73765	-4.73895	0.492397	0		At5g59080	23864634	23865721	Complement	K18B18.8	expressed protein	5.42919	-0.726189	-0.384775	-3.65409	3.45516	-0.973232	5.42919
At1g69420	26096859	26100570	sense	F23O10.1	zinc finger (DHHC type) familyprotein	-4.45819	1.18312	-1.15632	4.4737	-2.46547	0.0318916	0		At5g04140	1129853	1138443	sense	F21E1.60	glutamate synthase (GLU1) /ferredoxin-dependent glutamate synthase (Fd-GOGAT 1)	5.4135	-0.982458	-4.59733	0.511413	3.23142	-5.13397	5.4135
At1g62380	23085927	23087918	sense	F24O1.40	1-aminocyclopropane-1-carboxylate oxidase putative / ACCoxidase putative	-4.45305	2.5792	2.87459	-1.32044	-1.24948	5.4134	0		At1g68840	25883990	25885399	sense	T6L1.3	DNA-binding protein RAV2 (RAV2) /AP2 domain-containing protein RAP2.8	5.41118	-1.257	-1.51776	-1.85773	3.01007	-2.48258	5.41118
At1g75680	28420713	28423190	Complement	F10A5.13	glycosyl hydrolase family 9protein	-4.45007	0.560854	-0.753876	4.80794	-3.06869	-0.162	0		At4g18010	9991033	9994432	Complement	T6K21.190	inositol polyphosphate5-phosphatase II (IP5PII)	5.40535	-0.898348	0.253635	-4.40708	3.33727	-0.561762	5.40535
At1g70720	26670070	26670866	sense	F5A18.10	invertase/pectin methylesteraseinhibitor family protein	-4.40268	7.47571	1.57214	-3.72228	1.65776	8.8833	0		At2g18680	8101976	8102861	sense	MSF3.6	expressed protein	5.39652	-1.37309	-0.334687	-3.01027	2.85487	-1.49978	5.39652
At4g21750	11556071	11560739	sense	F17L22.210	L1 specific homeobox gene(ML1) / ovule-specific homeobox protein A20	-4.40267	0.61351	-1.00936	5.0588	-3.01515	-0.334586	0		At1g55850	20880365	20883146	sense	F14J16.9	cellulose synthase familyprotein	5.39601	-1.2613	-3.87055	0.253563	2.99499	-4.76429	5.39601
At2g30600	13043953	13048761	sense	T6B20.5	BTB/POZ domain-containingprotein	-4.39279	4.89382	1.78117	-2.25149	0.350219	6.49704	0		At4g16260	9200025	9201544	Complement	FCAALL.386	glycosyl hydrolase family 17protein	5.38407	0.2411	-0.824231	-4.54502	4.73666	-0.501965	5.38407
At2g31980	13616174	13616979	Complement	F22D22.27	cysteine proteinaseinhibitor-related	-4.38954	5.48055	-0.661208	-0.0756285	0.63589	3.76684	0		At2g30250	12910314	12912275	Complement	T27E13.4	WRKY family transcriptionfactor	5.37671	-0.919679	-0.328764	-3.48907	3.24593	-1.09527	5.37671
At3g14220	4732900	4734616	sense	MLE3.1	GDSL-motif lipase/hydrolase familyprotein	-4.3775	-0.211614	-0.806391	6.09	-3.90283	-0.885817	0		At4g12490	7409618	7410403	Complement	T1P17.80	protease inhibitor/seedstorage/lipid transfer protein (LTP) family protein	5.37547	-1.45913	-1.54896	-1.52768	2.73727	-2.71574	5.37547
At1g75900	28502723	28504799	sense	T4O12.13	family II extracellular lipase 3(EXL3)	-4.31495	-3.20789	1.55836	6.89909	-8.20839	-1.3234	0		At2g43000	17887694	17889661	Complement	F23E6.1	no apical meristem (NAM) familyprotein	5.36984	-1.40417	-1.4517	-1.50493	2.63603	-2.59125	5.36984
At5g07030	2183361	2185702	Complement	MOJ9.20	aspartyl protease family protein	-4.31258	-0.730521	-1.66575	9.2841	-4.46272	-2.11209	0		At3g21750	7664352	7666202	sense	MSD21.8	UDP-glucoronosyl/UDP-glucosyltransferase family protein	5.36979	-1.02084	-1.14223	-2.55547	3.27914	-1.91079	5.36979
At3g09970	3063779	3065580	sense	T22K18.22	calcineurin-likephosphoesterase family protein	-4.3086	3.46293	1.23038	-0.618834	-0.527561	4.32848	0		At3g47510	17522084	17522600	sense	F1P2.60	expressed protein	5.36933	-1.56362	0.33459	-3.67973	2.73643	-1.06363	5.36933
At4g25830	13133645	13135033	sense	F14M19.9	integral membrane familyprotein	-4.30398	2.78553	2.08007	-0.948775	-0.935473	4.8287	0		At5g28030	10030410	10032455	Complement	F15F15.100	cysteine synthase putative /O-acetylserine (thiol)-lyase putative / O-acetylserinesulfhydrylase putative	5.35338	-1.67595	-1.5062	-1.22356	2.41988	-2.90854	5.35338
At1g22335	7888300	7889230	sense	T16E15.13	expressed protein	-4.29742	2.11309	2.66453	-0.885601	-1.44007	4.73828	0		At3g47960	17708927	17711754	Complement	T17F15.170	proton-dependent oligopeptidetransport (POT) family protein	5.30225	-1.28254	-2.94238	-0.349273	2.84963	-3.90461	5.30225
At5g26850	9445443	9450822	sense	F2P16.24	expressed protein	-4.29024	0.751195	-0.923858	4.60876	-2.74692	-0.141971	0		At1g19610	6781474	6782030	Complement	F18O14.36	plant defensin-fusion proteinputative (PDF1.4)	5.28655	-1.39838	-1.43486	-1.52574	2.6408	-2.56413	5.28655
At4g21870	11603582	11604343	Complement	T8O5.80	26.5 kDa class P-related heatshock protein (HSP26.5-P)	-4.28434	3.04322	1.92296	-1.03212	-0.740401	4.93718	0		At5g49630	20159696	20163712	Complement	K6M13.1	amino acid permease 6 (AAP6)	5.27806	-1.53657	-2.3756	-0.64371	2.64324	-3.59695	5.27806
At5g05180	1536227	1538493	sense	K2A11.5	expressed protein	-4.26672	0.874504	3.89611	-0.637246	-2.60344	4.3324	0		At3g17640	6032399	6033589	sense	MKP6.19	leucine-rich repeat familyprotein	5.27788	-0.817741	-1.89368	-1.61251	3.19715	-2.42723	5.27788
At2g20870	8989071	8989793	Complement	F5H14.16	cell wall protein precursorputative	-4.26388	2.44604	5.15908	-3.22092	-1.30279	7.90995	0		At3g47990	17724129	17727293	Complement	T17F15.140	zinc finger (C3HC4-type RINGfinger) family protein	5.27151	-0.842193	-0.350546	-3.42037	3.21375	-1.04662	5.27151
At1g02205	418778	422438	sense	T7I23.10	CER1 protein	-4.22664	4.27514	-0.0847239	0.00768846	0.0666498	3.58831	0		At5g46230	18759667	18760272	Complement	MDE13.5	expressed protein	5.23612	-1.81068	-0.388476	-2.26577	2.27505	-1.93921	5.23612
At2g40330	16851942	16853012	Complement	T3G21.10	Bet v I allergen family protein	-4.22042	3.28341	1.51462	-0.872386	-0.548424	4.62079	0		At3g47380	17468780	17469555	sense	T21L8.130	invertase/pectin methylesteraseinhibitor family protein	5.22935	0.0106806	-0.80366	-4.04551	4.28091	-0.686873	5.22935
At4g03210	1415949	1417327	sense	F4C21.14	xyloglucan:xyloglucosyltransferase putative / xyloglucan endotransglycosylaseputative / endo-xyloglucan transferase putative	-4.21594	-2.47999	-1.37134	14.1976	-6.61289	-3.47809	0		At1g07000	2150193	2152324	Complement	F10K1.28	exocyst subunit EXO70 familyprotein	5.2229	-1.03785	-1.09937	-2.3548	3.07449	-1.89388	5.2229
At3g27770	10286072	10288979	Complement	MGF10.17	expressed protein	-4.20712	3.17753	2.67873	-1.78148	-0.759179	5.42514	0		At5g03350	815673	816657	Complement	F12E4.80	legume lectin family protein	5.20797	-1.51073	-1.7129	-1.24537	2.61781	-2.91994	5.20797
At3g23790	8575174	8581119	sense	MYM9.14	AMP-binding protein putative	-4.19872	0.245606	-0.919967	5.31898	-3.23527	-0.579848	0		At3g14660	4924784	4927441	sense	MIE1.16	cytochrome P450 putative	5.20546	0.470228	-0.981327	-4.48051	4.89411	-0.435597	5.20546
At1g60590	22317835	22320635	Complement	F8A5.12	polygalacturonase putative /pectinase putative	-4.19434	7.82484	-3.35034	1.15673	1.75773	2.37214	0		At1g03400	842746	844189	Complement	F21B7.39	2-oxoglutarate-dependentdioxygenase putative	5.20399	-0.365351	-0.528713	-3.90541	3.82498	-0.780262	5.20399
At5g08260	2657168	2661413	sense	T22D6.200	serine carboxypeptidase S10family protein	-4.18683	1.85792	-3.00525	5.972	-1.64492	-0.85919	0		At3g50940	18944744	18946592	sense	F18B3.220	AAA-type ATPase family protein	5.19342	-1.3461	-1.43546	-1.3554	2.50342	-2.53731	5.19342
At4g14960	8548488	8550426	Complement	FCAALL.199	tubulin alpha-6 chain (TUA6)	-4.1816	-0.675786	-0.0700006	5.42806	-4.2898	-0.652198	0		At4g37980	17852583	17854494	sense	F20D10.100	mannitol dehydrogenaseputative (ELI3-1)	5.17943	-0.906275	-0.248928	-3.52895	3.20772	-1.01002	5.17943
At2g05790	2199389	2201480	sense	T17C22.2	glycosyl hydrolase family 17protein	-4.17195	-1.31859	-1.82104	10.7166	-5.02499	-2.80391	0		At3g57510	21294315	21296918	Complement	T8H10.110	endo-polygalacturonase (ADPG1)	5.17558	0.0739224	-1.7334	-2.89216	4.31639	-1.42707	5.17558
At3g08740	2654647	2656242	Complement	F17O14.21	elongation factor P (EF-P)family protein	-4.13287	-3.0125	-0.793471	15.9723	-7.57172	-3.39367	0		At2g32190	13681594	13682362	sense	F22D22.6	expressed protein	5.16428	-2.63281	2.2669	-4.66082	1.57371	-0.290308	5.16428
At4g36360	17176345	17181245	Complement	AP22.44	beta-galactosidase putative /lactase putative	-4.12326	0.461872	-1.10087	5.11565	-2.96998	-0.545252	0		At1g72680	27362894	27364678	Complement	F28P22.13	cinnamyl-alcohol dehydrogenaseputative	5.15914	-0.72078	-0.516015	-3.4167	3.39527	-1.08366	5.15914
At3g59845	22117222	22118812	Complement	F24G16.1	NADP-dependent oxidoreductaseputative	-4.11646	1.81326	3.35492	-1.21724	-1.72024	4.86282	0		At3g28180	10507066	10510476	sense	MIG10.8	glycosyl transferase family 2protein	5.15904	-0.10915	-0.220966	-4.71721	4.13326	-0.287154	5.15904
At1g62990	23341030	23344353	sense	F16P17.16	homeodomain transcriptionfactor (KNAT7)	-4.11309	2.89393	2.1371	-1.212	-0.762705	5.0009	0		At4g11330	6892051	6894144	sense	F8L21.120	mitogen-activated proteinkinase putative / MAPK putative (MPK5)	5.14409	-0.000402835	-2.35115	-2.11778	4.19176	-2.0179	5.14409
At3g54660	20240723	20244160	Complement	T5N23.20	gluthatione reductasechloroplast	-4.09894	-0.270278	5.53625	-0.614451	-3.73195	4.15203	0		At4g36040	17049174	17050277	Complement	T19K4.170	DNAJ heat shock N-terminaldomain-containing protein (J11)	5.1419	0.536799	-3.80789	-1.47962	4.93169	-2.66142	5.1419
At1g10850	3611749	3614633	sense	T16B5.1	pseudogene leucine-rich repeattransmembrane protein kinase putativelikely BAC sequence errors result in a frameshiftpreventing the accurate annotation of this gene.	-4.09392	-0.93731	1.6577	3.21944	-4.58876	0.593313	0		At5g06530	1989748	1994913	Complement	F15M7.6	ABC transporter family protein	5.12433	0.624656	-3.70743	-1.5992	5.0572	-2.47685	5.12433
At1g52830	19676164	19677312	Complement	F14G24.10	auxin-responsive protein /indoleacetic acid-induced protein 6 (IAA6)	-4.04855	4.4615	3.75133	-4.23202	0.272651	10.8496	0		At1g65510	24363116	24363532	sense	F5I14.24	expressed protein	5.12378	-0.999134	-1.15281	-2.17786	2.97526	-1.91364	5.12378
At4g00950	405673	407142	Complement	T18A10.4	expressed protein	-4.0384	7.02366	2.1181	-4.40484	1.64156	9.94962	0		At1g75460	28331547	28333425	sense	F1B16.1	ATP-dependent protease La (LON)domain-containing protein	5.12162	-0.537984	-1.5736	-2.272	3.49761	-1.85942	5.12162
At1g30795	10935735	10936330	sense	T17H7.7	hydroxyproline-rich glycoproteinfamily protein	-4.03068	-0.039765	-1.69684	6.80804	-3.44229	-1.50137	0		At4g16990	9560154	9565473	sense	FCAALL.324	disease resistance protein(TIR-NBS class) putative	5.11849	-1.21953	-2.32615	-0.836581	2.79321	-3.23161	5.11849
At2g24210	10301410	10304481	sense	F27D4.12	myrcene/ocimene synthase(TPS10)	-4.02926	5.51013	4.82201	-6.60269	0.928549	16.1694	0		At4g20860	11172633	11174478	sense	T13K14.20	FAD-binding domain-containingprotein	5.11576	-1.17638	-0.502673	-2.80747	2.85296	-1.47894	5.11576
At5g03120	733978	734942	sense	F15A17.150	expressed protein	-4.01462	2.63061	4.35016	-2.96474	-0.946673	7.55645	0		At5g64840	25933949	25937036	Complement	MXK3.6	ABC transporter family protein	5.11531	-0.648735	-0.146877	-3.94216	3.42492	-0.695047	5.11531
At3g58080	21521283	21521539	Complement	T10K17.290	hypothetical protein	-3.99705	3.94398	2.01189	-2.03366	-0.00597314	6.17892	0		At1g09560	3093841	3094864	sense	F14J9.22	germin-like protein (GLP4)(GLP5)	5.1065	-1.54052	-2.50392	-0.399238	2.52044	-3.73954	5.1065
At1g09155	2949678	2950991	Complement	T12M4.17	SKP1 interacting partner3-related	-3.99604	2.87484	4.54145	-3.39115	-0.745997	8.4952	0		At1g72900	27435226	27437443	sense	F3N23.10	disease resistance protein(TIR-NBS class) putative	5.10385	-1.19096	-0.344823	-3.00525	2.87271	-1.34546	5.10385
At1g29510	10322560	10323175	sense	F15D2.9	auxin-responsive proteinputative	-3.99014	1.64701	2.65789	-0.57652	-1.73087	4.01111	0		At2g19190	8333131	8337026	Complement	T20K24.21	light-responsive receptorprotein kinase / senescence-responsive receptor-likeserine/threonine kinase putative (SIRK)	5.06836	-0.891453	-1.27025	-2.22372	3.12283	-1.91522	5.06836
At3g56340	20903116	20904395	Complement	F18O21.300	40S ribosomal protein S26(RPS26C)	-3.96025	-0.22835	-1.72935	7.28281	-3.58321	-1.70182	0		At1g08050	2498833	2501388	Complement	T6D22.13	zinc finger (C3HC4-type RINGfinger) family protein	5.05584	-0.986233	-0.624795	-2.86703	3.0361	-1.41729	5.05584
At2g28950	12438418	12440672	Complement	F8N16.24	expansin putative (EXP6)	-3.95812	0.721894	-3.74655	9.70309	-2.59821	-2.45043	0		At5g59780	24099423	24100657	Complement	MTH12.19	myb family transcription factor(MYB59)	5.05364	-0.579176	-1.01848	-2.78415	3.40021	-1.40435	5.05364
At3g15510	5243518	5245389	sense	MJK13.17	no apical meristem (NAM) familyprotein (NAC2)	-3.93081	2.53154	4.02398	-2.65416	-0.984971	6.73224	0		At3g19900	6922574	6925029	Complement	MPN9.15	expressed protein	5.03015	-2.64756	-2.23324	0.454253	1.49916	-4.73441	5.03015
At4g33790	16204159	16207947	Complement	T16L1.280	acyl CoA reductase putative	-3.93053	-2.06314	1.57708	4.73974	-6.41482	-0.396717	0		At5g50760	20661887	20662695	sense	MFB16.16	auxin-responsive family protein	5.02685	-1.46029	-0.886423	-1.92614	2.46767	-2.09369	5.02685
At1g03170	769632	770684	sense	F15K9.22	expressed protein	-3.92483	-1.30491	-0.970801	8.19715	-4.81776	-2.01512	0		At5g10380	3267719	3268814	sense	F12B17.270	zinc finger (C3HC4-type RINGfinger) family protein	5.02208	0.0531719	-1.79832	-2.8227	4.23194	-1.50354	5.02208
At1g68220	25573894	25575375	sense	T22E19.15	expressed protein	-3.92014	0.111053	-0.255898	4.17315	-3.17957	-0.124749	0		At5g11210	3571215	3574538	Complement	F2I11.100	glutamate receptor familyprotein (GLR2.5)	5.02078	-0.75123	-1.03689	-2.47277	3.13764	-1.5808	5.02078
At1g30690	10887687	10890297	sense	T5I8.14	SEC14 cytosolic factor familyprotein / phosphoglyceride transfer family protein	-3.89958	-0.598329	0.171599	4.63037	-3.96408	-0.374222	0		At2g39200	16363237	16366891	Complement	T16B24.16	seven transmembrane MLO familyprotein / MLO-like protein 12 (MLO12)	5.02048	-1.35265	-1.21494	-1.57482	2.48335	-2.31584	5.02048
At5g37300	14784729	14787479	sense	MNJ8.9	expressed protein	-3.89753	-1.71161	-0.32431	7.57662	-5.36135	-1.78268	0		At1g19510	6756284	6757368	Complement	F18O14.26	myb family transcriptionfactor	5.01757	-0.470651	-1.43543	-2.53207	3.57785	-1.67075	5.01757
At4g18960	10382867	10388550	sense	F13C5.130	floral homeotic protein AGAMOUS(AG)	-3.879	-4.00777	6.06325	2.33126	-9.04896	1.15612	0		At5g16980	5579146	5580783	Complement	F2K13.130	NADP-dependent oxidoreductaseputative	5.01128	-1.1236	-1.59198	-1.26849	2.59596	-2.47505	5.01128
At3g13470	4389692	4392762	sense	MRP15.11	chaperonin putative	-3.85313	-0.972452	-0.266571	6.01882	-4.39046	-1.08493	0		At3g07690	2457241	2459558	sense	F17A17.3	NAD-dependentglycerol-3-phosphate dehydrogenase family protein	4.99856	-0.83307	-1.5188	-2.03158	3.184	-2.08132	4.99856
At1g70940	26746716	26750057	sense	F15H11.14	auxin transport proteinputative (PIN3)	-3.8447	3.57449	3.5477	-3.3576	-0.152261	8.51378	0		At5g61670	24800764	24803171	sense	K11J9.20	expressed protein	4.99076	-0.74941	-0.928918	-2.40808	3.00511	-1.48597	4.99076
At1g05450	1599955	1601624	sense	T25N20.10	protease inhibitor/seedstorage/lipid transfer protein (LTP)-related	-3.84335	3.02914	-3.39025	4.2674	-0.555154	-0.244513	0		At4g33540	16130876	16133963	sense	T16L1.30	metallo-beta-lactamase familyprotein	4.97823	-1.05671	-0.822906	-2.48774	2.91111	-1.65877	4.97823
At5g09730	3015248	3018263	Complement	F17I14.80	glycosyl hydrolase family 3protein	-3.83916	-1.09754	-2.74785	13.2194	-4.45885	-3.45275	0		At2g15480	6766000	6767715	sense	F9O13.3	UDP-glucoronosyl/UDP-glucosyltransferase family protein	4.97569	-1.19665	-1.13687	-1.9319	2.71481	-2.08194	4.97569
At1g72260	27202095	27203106	Complement	T9N14.13	thionin (THI2.1)	-3.83015	-4.34329	0.349048	12.4652	-9.46751	-3.30299	0		At1g56060	20970193	20970809	Complement	T6H22.17	expressed protein	4.96934	-1.46756	-0.598149	-2.09109	2.3473	-1.83138	4.96934
At2g30150	12881783	12883199	sense	T27E13.11	UDP-glucoronosyl/UDP-glucosyltransferase family protein	-3.80378	3.57913	1.67716	-1.56016	-0.1149	5.14962	0		At5g50200	20453406	20454952	sense	K6A12.6	expressed protein	4.96511	-2.18271	-1.74701	-0.430111	1.88935	-3.62663	4.96511
At1g27120	9421164	9424054	sense	T7N9.18	galactosyltransferase familyprotein	-3.78973	-1.63799	3.1821	2.19639	-5.16982	1.18694	0		At2g17220	7494736	7497258	Complement	T23A1.8	protein kinase putative	4.95655	-0.28268	-2.60358	-1.47492	3.72638	-2.50964	4.95655
At4g39480	18362482	18366782	sense	F23K16.110	cytochrome P450 familyprotein	-3.7854	4.27351	1.66359	-2.10404	0.334258	5.75601	0		At3g56370	20910078	20913960	Complement	T5P19.20	leucine-rich repeattransmembrane protein kinase putative	4.95444	-0.683811	-1.0515	-2.65997	3.30403	-1.52471	4.95444
At2g06925	2842350	2843298	Complement	T4E14.19	phospholipase A2 family protein	-3.78096	0.879746	-1.29928	4.4409	-2.24649	-0.347211	0		At5g20380	6887727	6892410	Complement	F5O24.270	transporter-related	4.95261	-0.313434	-0.519436	-3.36429	3.40505	-0.7281	4.95261
At1g78490	29533169	29535558	sense	T30F21.17	cytochrome P450 family protein	-3.76299	-3.2369	1.36648	6.60325	-7.61042	-1.49732	0		At1g51820	19241076	19245552	Complement	T14L22.3	leucine-rich repeat proteinkinase putative	4.93944	-0.53561	-1.59264	-2.05356	3.33949	-1.87639	4.93944
At1g11545	3878550	3880360	Complement	T23J18.21	xyloglucan:xyloglucosyltransferase putative / xyloglucan endotransglycosylaseputative / endo-xyloglucan transferase putative	-3.76276	2.42004	3.46365	-2.21682	-0.941017	5.95012	0		At5g54860	22301855	22304432	sense	MBG8.12	integral membrane transporterfamily protein	4.93551	-1.00414	-1.80142	-1.44445	2.90535	-2.51298	4.93551
At2g45970	18919333	18921812	Complement	F4I18.5	cytochrome P450 putative	-3.7612	-0.439863	-0.889397	6.04194	-3.65082	-1.16298	0		At4g12480	7406102	7406934	Complement	T1P17.70	protease inhibitor/seedstorage/lipid transfer protein (LTP) family protein	4.93538	-1.38476	-1.35114	-1.44577	2.47781	-2.46753	4.93538
At5g03760	985698	990546	Complement	F17C15.180	glycosyl transferase family 2protein	-3.76017	-1.41692	8.0092	-0.845374	-4.84706	4.1213	0		At5g22380	7408783	7410099	Complement	MWD9.18	no apical meristem (NAM) familyprotein	4.93088	-1.18195	-1.12252	-1.6567	2.48744	-2.07668	4.93088
At1g55260	20618418	20620034	sense	F7A10.16	protease inhibitor/seedstorage/lipid transfer protein (LTP) family protein	-3.75606	4.47976	1.67671	-2.30053	0.473328	6.06249	0		At5g16570	5421746	5424569	Complement	MQK4.25	glutamine synthetase putative	4.92749	-0.24761	-1.63347	-2.33189	3.68508	-1.63843	4.92749
At5g62890	25260650	25264603	sense	MQB2.190	permease putative	-3.74548	-0.185336	-0.766874	5.38035	-3.34277	-0.82914	0		At5g09660	2993446	2995676	Complement	F17I14.150	malate dehydrogenaseglyoxysomal	4.92309	-1.21122	-3.37759	0.149345	2.70232	-4.24937	4.92309
At3g55320	20518368	20524370	Complement	T26I12.200	ABC transporter familyprotein	-3.72963	-0.33817	0.0310629	4.20463	-3.50857	-0.268797	0		At3g02875	631920	634081	sense	F13E7.18	IAA-amino acid hydrolase 1(ILR1)	4.91871	-1.50375	-0.302413	-2.30318	2.2323	-1.58821	4.91871
At3g63410	23426190	23428093	Complement	MAA21.40	chloroplast inner envelopemembrane protein putative (APG1)	-3.72717	2.95276	2.67857	-2.0604	-0.494719	5.82261	0		At2g37760	15838940	15840997	sense	T8P21.6	aldo/keto reductase familyprotein	4.91302	-0.701796	-0.105774	-3.78617	3.26708	-0.704692	4.91302
At3g11650	3676152	3677043	Complement	T19F11.5	harpin-induced family protein /HIN1 family protein / harpin-responsive family protein /NDR1/HIN1-like protein 2	-3.72399	-0.452631	8.81561	-2.29194	-3.62995	5.89737	0		At3g21860	7699784	7700242	Complement	MSD21.23	E3 ubiquitin ligase SCF complexsubunit SKP1/ASK1 (At10) putative	4.91164	-1.47774	-0.522407	-2.35091	2.4807	-1.7632	4.91164
At4g27440	13725597	13727359	sense	F27G19.40	protochlorophyllide reductaseB chloroplast / PCR B / NADPH-protochlorophyllideoxidoreductase B (PORB)	-3.72173	-0.460564	-1.78374	7.72861	-3.63852	-1.96545	0		At1g24150	8549507	8551982	sense	F3I6.8	formin homology 2domain-containing protein / FH2 domain-containing protein	4.90776	-1.69957	-1.54517	-0.927426	2.1707	-2.96935	4.90776
At3g21510	7578181	7579603	Complement	MIL23.7	two-component phosphorelaymediator 3 (HP3)	-3.70219	6.2339	1.35685	-3.26414	1.47877	7.3273	0		At1g78410	29507475	29508134	sense	F3F9.8	VQ motif-containing protein	4.90739	-1.4753	-1.01577	-1.66625	2.35966	-2.23396	4.90739
At3g14330	4779695	4782459	Complement	MLN21.12	pentatricopeptide (PPR)repeat-containing protein	-3.6948	2.51098	2.61965	-1.60929	-0.817149	5.02862	0		At5g42830	17193612	17195246	sense	MJB21.1	transferase family protein	4.90037	-1.52178	-0.796611	-1.92432	2.3813	-2.05988	4.90037
At5g48480	19661901	19663103	sense	MJE7.12	expressed protein	-3.67921	-1.46213	-1.46485	9.75171	-4.77147	-2.62184	0		At1g31580	11311154	11311970	sense	F27M3.20	expressed protein	4.89725	-1.34393	-0.508944	-2.44924	2.56708	-1.62947	4.89725
At2g45560	18783126	18785584	Complement	F17K2.9	cytochrome P450 family protein	-3.66964	6.74356	2.25362	-4.65923	1.61548	11.1514	0		At1g21520	7534522	7534722	Complement	F24J8.16	expressed protein	4.8931	-1.84664	-0.792824	-1.07395	1.6496	-2.41509	4.8931
At5g47550	19303676	19304221	Complement	MNJ7.14	cysteine protease inhibitorputative / cystatin putative	-3.66317	4.90626	1.02359	-2.00329	0.792644	5.45633	0		At3g05630	1635265	1640349	sense	F18C1.10	phospholipase D putative(PLDP2)	4.88168	-0.352641	-0.058415	-4.29317	3.58071	-0.359535	4.88168
At1g72970	27456438	27459594	sense	F3N23.17	glucose-methanol-choline (GMC)oxidoreductase family protein	-3.6586	-2.65924	-1.64919	14.9197	-6.21066	-3.94477	0		At2g23420	9978845	9982272	sense	F26B6.7	nicotinatephosphoribosyltransferase family protein / NAPRTase familyprotein	4.87927	-0.948682	-1.68599	-1.53546	2.89393	-2.35667	4.87927
At1g30360	10715647	10718979	sense	T4K22.4	early-responsive to dehydrationstress protein (ERD4)	-3.64784	4.5754	0.0837246	-0.797079	0.605032	3.95682	0		At2g23680	10073243	10074535	sense	F27L4.20	stress-responsive proteinputative	4.8769	-1.33848	-0.848118	-1.98357	2.48266	-1.94701	4.8769
At3g23000	8172604	8174138	sense	MXC7.3	CBL-interacting protein kinase 7(CIPK7)	-3.64751	2.15762	2.85738	-1.5048	-1.08682	4.79353	0		At2g43100	17927737	17928766	sense	F14B2.4	aconitase C-terminaldomain-containing protein	4.87526	-0.407809	-1.78484	-2.13108	3.55171	-1.9191	4.87526
At4g37800	17775468	17777391	Complement	T28I19.80	xyloglucan:xyloglucosyltransferase putative / xyloglucan endotransglycosylaseputative / endo-xyloglucan transferase putative	-3.64748	8.46437	2.47222	-6.41255	2.55013	13.6461	0		At5g02020	386079	388120	Complement	T7H20.70	expressed protein	4.86807	-0.928476	0.73762	-4.62105	2.98219	-0.168843	4.86807
At2g39700	16550910	16552662	Complement	F17A14.7	expansin putative (EXP4)	-3.6418	-2.77142	9.45199	-0.220321	-6.5748	3.31658	0		At1g01480	175782	178400	sense	F22L4.4	1-aminocyclopropane-1-carboxylatesynthase 2 / ACC synthase 2 (ACS2) (ACC1)	4.86007	0.337633	-1.00014	-3.97635	4.43876	-0.5679	4.86007
At2g28790	12361507	12362508	Complement	F8N16.8	osmotin-like protein putative	-3.64122	-2.71929	-1.65975	16.4378	-6.32037	-4.02593	0		At3g13040	4172149	4175255	Complement	MGH6.22	myb family transcription factor	4.85727	-0.460201	-1.41872	-2.44838	3.47921	-1.64641	4.85727
At1g78170	29418952	29419987	sense	T11I11.11	expressed protein	-3.62526	5.41671	-1.01176	-0.220905	1.06418	3.30025	0		At1g25550	8976525	8978080	sense	F2J7.21	myb family transcription factor	4.85462	-0.871426	-0.73805	-2.69658	3.00472	-1.41711	4.85462
At5g59120	23881956	23885275	Complement	K18B18.11	subtilase family protein	-3.61735	-3.32831	2.37625	4.8957	-8.07594	-0.71541	0		At2g38640	16164682	16165632	Complement	T6A23.16	expressed protein	4.85272	0.163283	-1.04997	-3.61995	4.19811	-0.763792	4.85272
At3g05020	1391658	1392960	Complement	T9J14.3	acyl carrier protein 1chloroplast (ACP-1)	-3.61454	-0.512533	0.875451	3.15649	-3.62928	0.307529	0		At5g46050	18692262	18696373	Complement	MCL19.10	proton-dependent oligopeptidetransport (POT) family protein	4.81855	-0.597335	-0.312442	-3.55363	3.28001	-0.796497	4.81855
At5g40610	16282090	16284520	Complement	MNF13.130	glycerol-3-phosphatedehydrogenase [NAD+] / GPDH	-3.61077	-1.46994	2.1905	2.80373	-4.92089	0.560984	0		At1g19020	6568064	6568569	sense	F14D16.17	expressed protein	4.81454	0.374583	-0.810906	-4.23369	4.45513	-0.374062	4.81454
At4g28680	14155254	14158676	sense	T5F17.130	tyrosine decarboxylaseputative	-3.604	-1.96286	0.792047	5.35432	-5.40997	-0.99417	0		At1g69790	26270422	26272646	sense	T6C23.1	protein kinase putative	4.81128	-1.01801	-1.03161	-2.14305	2.80755	-1.81738	4.81128
At2g17845	7765928	7766963	sense	T13L16.19	short-chaindehydrogenase/reductase (SDR) family protein	-3.60324	7.95766	1.27076	-4.32959	2.33182	8.862	0		At5g59220	23911630	23913845	Complement	MNC17.13	protein phosphatase 2C putative/ PP2C putative	4.81064	-0.803476	-0.155594	-3.40203	2.9915	-0.838667	4.81064
At2g35190	14837705	14840398	sense	T4C15.14	novel plant SNARE 11 (NPSN11)	-3.60162	-1.41438	2.25299	2.67964	-4.80023	0.657532	0		At4g39830	18478923	18481337	sense	T5J17.9	L-ascorbate oxidase putative	4.81044	-1.66012	-1.23434	-1.27044	2.20096	-2.60957	4.81044
At3g09780	3000764	3003170	Complement	F8A24.17	protein kinase family protein	-3.59555	-0.517701	0.141259	4.17351	-3.59725	-0.329776	0		At4g01870	808376	810446	Complement	T7B11.13	tolB protein-related	4.80979	-0.00701748	-0.556429	-4.07319	4.00833	-0.488324	4.80979
At4g38580	18034445	18035879	sense	F20M13.140	heavy-metal-associateddomain-containing protein / copper chaperone(CCH)-related	-3.58419	1.42745	-1.68136	3.94128	-1.65647	-0.199549	0		At3g09240	2835674	2837962	Complement	F3L24.11	protein kinase-related	4.79964	-1.34319	-1.19472	-1.67252	2.52633	-2.26578	4.79964
At5g27000	9498055	9503137	sense	F2P16.12	kinesin motor protein-related	-3.57938	0.49695	6.64712	-2.53796	-2.52314	6.1159	0		At1g22890	8102807	8103521	sense	F19G10.22	expressed protein	4.7977	-1.80819	-1.34186	-1.01316	2.07051	-2.85398	4.7977
At4g22730	11941395	11943750	sense	T12H17.120	leucine-rich repeattransmembrane protein kinase putative	-3.57277	5.92572	0.883441	-2.62808	1.40803	6.18901	0		At3g21480	7567736	7572104	sense	MIL23.5	transcription activationdomain-interacting protein-related	4.79106	-1.05687	-1.04318	-2.07212	2.75417	-1.86399	4.79106
At2g35960	15114019	15114966	sense	F11F19.13	harpin-induced family protein /HIN1 family protein / harpin-responsive family protein	-3.57223	1.67688	4.11604	-2.15761	-1.41732	5.648	0		At1g13750	4714820	4718232	Complement	F21F23.18	calcineurin-likephosphoesterase family protein	4.78554	-1.07408	-1.63071	-1.33937	2.65601	-2.43724	4.78554
At1g75780	28454802	28457301	Complement	T4O12.1	tubulin beta-1 chain (TUB1)	-3.57192	0.0561637	4.1192	-0.447039	-2.93309	3.50482	0		At5g66400	26535523	26536468	Complement	K1L20.1	dehydrin (RAB18)	4.77941	-2.22305	1.44923	-3.72653	1.66637	-0.635667	4.77941
At5g67020	26767076	26768475	sense	K8A10.9	expressed protein	-3.5688	2.4674	5.00514	-3.782	-0.797099	7.91413	0		At5g47330	19224333	19226049	sense	MQL5.19	palmitoyl protein thioesterasefamily protein	4.7786	-1.4283	-1.37788	-1.17057	2.26441	-2.55301	4.7786
At5g37170	14730041	14731533	sense	MJG14.10	O-methyltransferase family 2protein	-3.56071	-1.642	8.77482	-1.18603	-4.88581	4.31826	0		At1g43160	16266253	16267258	sense	F1I21.18	AP2 domain-containing proteinRAP2.6 (RAP2.6)	4.77822	-1.67554	-0.739913	-1.47848	1.93242	-2.17163	4.77822
At2g24790	10573977	10575224	sense	F27C12.29	zinc finger (B-box type) familyprotein	-3.55361	0.267845	-0.559969	4.00988	-2.71008	-0.250368	0		At1g72890	27433608	27435378	sense	F3N23.9	disease resistance protein(TIR-NBS class) putative	4.76319	-0.889167	-0.406468	-3.02259	2.93733	-1.13721	4.76319
														At1g79680	29984866	29987666	Complement	F20B17.10	wall-associated kinaseputative	4.76151	-1.46538	-0.649661	-2.03943	2.3328	-1.87493	4.76151
														At2g04039	1333268	1334563	sense	F3L12.11	expressed protein	4.7579	0.468769	-2.28932	-2.38962	4.52939	-1.51712	4.7579
														At1g08250	2588854	2590298	Complement	T23G18.10	prephenate dehydratase familyprotein	4.75755	-1.0076	-1.99547	-1.0593	2.72527	-2.71192	4.75755
														At2g15020	6498516	6500434	Complement	T15J14.6	expressed protein	4.74271	-0.626191	-1.11691	-2.45907	3.1818	-1.534	4.74271
														At1g69480	26117775	26121142	Complement	F10D13.13	EXS family protein /ERD1/XPR1/SYG1 family protein	4.73781	-0.877524	-0.895652	-2.34444	2.86344	-1.56745	4.73781
														At3g26200	9590519	9592416	sense	MTC11.11	cytochrome P450 71B22 putative(CYP71B22)	4.73748	-1.28372	-1.2478	-1.54782	2.47677	-2.26907	4.73748
														At3g28520	10689560	10690996	sense	T20D4.3	AAA-type ATPase family protein	4.72692	-1.09443	-0.681608	-2.35342	2.64526	-1.57011	4.72692
														At1g17050	5829092	5831326	sense	F6I1.22	geranyl diphosphate synthaseputative / GPPS putative / dimethylallyltransferaseputative / prenyl transferase putative	4.7073	-0.129351	-0.715923	-3.58913	3.75876	-0.734694	4.7073
														At1g55910	20909799	20911078	sense	F14J16.16	metal transporter putative(ZIP11)	4.69263	-0.725541	-0.905656	-2.48161	2.99919	-1.43767	4.69263
														At3g18800	6479694	6480384	sense	MVE11.18	expressed protein	4.67694	0.374568	-3.83855	-0.979606	4.33625	-2.84846	4.67694
														At3g26230	9599437	9601140	Complement	MTC11.22	cytochrome P450 family protein	4.67517	-0.527745	-2.65701	-1.06968	3.31706	-2.79719	4.67517
														At2g17120	7466129	7468388	sense	F6P23.25	peptidoglycan-binding LysMdomain-containing protein	4.66752	-2.15162	-1.39466	-0.530113	1.67269	-3.2585	4.66752
														At1g76360	28647254	28651489	Complement	F15M4.14	protein kinase putative	4.65766	0.0772677	-1.72102	-2.51624	3.92373	-1.41293	4.65766
														At4g16730	9402989	9406025	sense	FCAALL.15	terpene synthase/cyclase familyprotein	4.65375	0.09658	-1.62971	-2.59269	3.93112	-1.31669	4.65375
														At1g53100	19790658	19792115	Complement	F8L10.4	glycosyltransferase family 14protein / core-2/I-branching enzyme family protein	4.64755	-1.18176	-0.580286	-2.19135	2.40746	-1.56119	4.64755
														At2g25680	10940245	10941615	Complement	F3N11.13	expressed protein	4.64235	0.415608	-0.692347	-4.30505	4.35678	-0.235189	4.64235
														At3g53690	19909794	19911043	Complement	F4P12.390	zinc finger (C3HC4-type RINGfinger) family protein	4.63698	-1.98386	0.383258	-2.50085	1.7291	-1.36871	4.63698
														At1g19250	6650520	6653069	Complement	T29M8.12	flavin-containing monooxygenasefamily protein / FMO family protein	4.63347	-1.32961	-0.766105	-1.95522	2.37558	-1.86006	4.63347
														At3g14630	4917505	4919416	sense	MIE1.13	cytochrome P450 putative	4.62526	-1.36243	-0.324825	-2.44722	2.37222	-1.48161	4.62526
														At1g51860	19261303	19265148	Complement	T14L22.7	leucine-rich repeat proteinkinase putative	4.62257	-1.05093	-0.919114	-2.10717	2.66147	-1.74448	4.62257
														At5g42270	16919714	16923100	sense	K5J14.13	FtsH protease putative	4.6199	0.310471	-1.54134	-2.94404	4.1965	-1.04818	4.6199
														At3g17510	5988997	5992918	Complement	MKP6.20	CBL-interacting protein kinase 1(CIPK1)	4.59008	0.217383	-1.4971	-2.89079	4.05047	-1.09583	4.59008
														At1g22900	8103899	8104462	Complement	F19G10.14	disease resistance-responsivefamily protein	4.58764	-1.55282	-1.10225	-1.31047	2.11428	-2.39002	4.58764
														At2g22860	9744693	9745378	sense	T20K9.7	phytosulfokines 2 (PSK2)	4.58166	-2.13965	1.23696	-3.46654	1.73169	-0.758551	4.58166
														At4g22470	11840146	11841462	Complement	F7K2.50	protease inhibitor/seedstorage/lipid transfer protein (LTP) family protein	4.57809	-1.84355	-0.918809	-1.09032	1.75663	-2.50121	4.57809
														At1g28570	10041627	10044136	Complement	F1K23.19	GDSL-motif lipase putative	4.57365	0.000952274	-2.70876	-1.35198	3.75055	-2.30868	4.57365
														At3g47390	17473079	17475640	sense	T21L8.140	cytidine/deoxycytidylatedeaminase family protein	4.57251	-1.90376	-2.53374	0.355586	1.82769	-4.23034	4.57251
														At1g66160	24640859	24642271	sense	F15E12.6	U-box domain-containing protein	4.57203	-1.05175	-1.37386	-1.63798	2.6661	-2.15772	4.57203
														At3g20240	7057023	7058897	sense	MAL21.26	mitochondrial substrate carrierfamily protein	4.56633	-0.285006	-1.47168	-2.34432	3.45575	-1.5313	4.56633
														At4g23620	12314035	12316725	Complement	F9D16.90	50S ribosomal protein-related	4.54817	-1.05201	-1.35222	-1.5586	2.58426	-2.14734	4.54817
														At3g48030	17736395	17738939	Complement	T17F15.100	hypoxia-responsive familyprotein / zinc finger (C3HC4-type RING finger) familyprotein	4.54692	-1.38916	-1.07638	-1.46085	2.22777	-2.21242	4.54692
														At1g76040	28542718	28545531	sense	T4O12.25	calcium-dependent proteinkinase putative / CDPK putative	4.53357	-0.794582	-1.77011	-1.33338	2.7982	-2.28882	4.53357
														At5g44870	18131893	18135835	sense	K21C13.4	disease resistance protein(TIR-NBS-LRR class) putative	4.52151	-0.562296	-1.98023	-1.49304	3.11829	-2.24045	4.52151
														At5g45510	18461884	18466673	sense	MFC19.18	leucine-rich repeat familyprotein	4.52118	-1.78451	-0.342627	-1.79461	1.83642	-1.87229	4.52118
														At4g10060	6288850	6295398	sense	T5L19.190	expressed protein	4.51625	-0.0133412	-3.15914	-1.01125	3.73692	-2.70575	4.51625
														At3g01060	16650	18847	Complement	T4P13.26	expressed protein	4.50707	0.0205456	-2.27423	-1.80942	3.75594	-1.93375	4.50707
														At1g78070	29359925	29363883	sense	F28K19.28	WD-40 repeat family protein	4.50236	0.535543	-1.32111	-3.45199	4.40338	-0.66488	4.50236
														At3g02840	618416	619693	sense	F13E7.22	immediate-early fungal elicitorfamily protein	4.49296	-0.306455	-1.99099	-1.75238	3.38539	-2.00352	4.49296
														At4g05100	2618452	2619885	sense	C17L7.20	myb family transcription factor(MYB74)	4.48989	-1.25882	-0.881067	-1.81982	2.3622	-1.90203	4.48989
														At3g56680	21002259	21004646	sense	T8M16.10	expressed protein	4.4806	-0.816923	-3.63839	0.258486	2.78271	-4.03043	4.4806
														At1g21065	7374199	7375778	sense	T22I11.11	expressed protein	4.48007	-0.0201653	-1.20765	-2.83547	3.66675	-1.06257	4.48007
														At3g45590	16743579	16745246	sense	F9K21.170	tRNA-splicing endonucleaseputative	4.47748	-1.18331	-1.98202	-0.823715	2.46551	-2.85503	4.47748
														At5g60540	24353849	24356028	Complement	MUF9.1	SNO glutamine amidotransferasefamily protein	4.47069	-0.517747	-2.31939	-0.904807	2.92476	-2.52362	4.47069
														At2g29990	12800639	12802990	Complement	F23F1.9	pyridine nucleotide-disulphideoxidoreductase family protein	4.46839	0.0824601	-0.676876	-3.63145	3.7838	-0.513815	4.46839
														At5g40390	16178743	16182585	sense	MPO12.100	raffinose synthase familyprotein	4.46815	-1.66754	-1.66171	-0.626511	1.99481	-3.03749	4.46815
														At3g18460	6333054	6333954	Complement	MYF24.18	hypothetical protein	4.46807	-0.666413	-0.990552	-2.25112	2.88278	-1.46176	4.46807
														At1g26380	9126724	9128515	Complement	T1K7.24	FAD-binding domain-containingprotein	4.43973	-1.2968	-0.91407	-1.71195	2.29703	-1.96738	4.43973
														At1g67470	25275845	25277239	sense	T1F15.6	protein kinase family protein	4.42393	-1.44874	-1.58391	-0.865885	2.14722	-2.74893	4.42393
														At3g53780	19935546	19938004	Complement	F5K20.80	rhomboid family protein	4.41521	-0.222273	-0.791703	-3.0962	3.41135	-0.883436	4.41521
														At2g36590	15349758	15352416	Complement	F1O11.22	proline transporter putative	4.40773	-0.839466	-0.903173	-2.11539	2.66589	-1.54162	4.40773
														At1g64280	23856411	23859229	Complement	F15H21.6	regulatory protein (NPR1)	4.40144	0.289798	-0.941425	-3.53667	3.99739	-0.558766	4.40144
														At1g43910	16658044	16660096	Complement	F9C16.7	AAA-type ATPase family protein	4.39391	-3.19512	-0.387523	-0.453987	0.722958	-3.15213	4.39391
														At2g34660	14609793	14619644	sense	T29F13.13	glutathione S-conjugate ABCtransporter (MRP2)	4.37931	-0.768509	-0.136574	-3.17427	2.7791	-0.793038	4.37931
														At1g73650	27691784	27693968	Complement	F25P22.29	expressed protein	4.37569	0.385606	-2.44545	-1.70978	4.09704	-1.69108	4.37569
														At5g63790	25543735	25545239	Complement	MBK5.27	no apical meristem (NAM) familyprotein	4.36753	0.547781	-0.798827	-4.07621	4.2946	-0.21193	4.36753
														At5g52390	21281162	21282490	Complement	K24M7.13	photoassimilate-responsiveprotein putative	4.35356	-2.15878	-0.533832	-1.13635	1.44181	-2.39226	4.35356
														At3g05650	1645686	1648579	Complement	F18C1.8	disease resistance familyprotein	4.3515	-1.16974	-1.86666	-0.815606	2.35694	-2.74425	4.3515
														At1g02220	428902	430567	Complement	T7I23.18	no apical meristem (NAM) familyprotein	4.32415	-0.385454	-0.503691	-3.15725	3.15831	-0.776775	4.32415
														At1g67970	25488362	25490125	Complement	T23K23.18	heat shock factor proteinputative (HSF5) / heat shock transcription factorputative (HSTF5)	4.32274	-0.0627818	-1.11384	-2.80302	3.51098	-1.02027	4.32274
														At4g23050	12080071	12084267	sense	F7H19.240	protein kinase putative	4.3185	-0.963438	0.423915	-3.58326	2.52077	-0.470527	4.3185
														At1g30260	10651035	10651712	sense	F12P21.9	expressed protein	4.31255	-1.8341	-1.66605	-0.35187	1.74769	-3.213	4.31255
														At4g23470	12249059	12251406	sense	F16G20.180	hydroxyproline-richglycoprotein family protein	4.30851	-1.21745	-0.984736	-1.6138	2.28393	-1.95907	4.30851
														At3g08980	2740813	2742690	sense	T16O11.6	signal peptidase I familyprotein	4.30795	-0.626272	-0.335369	-3.01066	2.85155	-0.84298	4.30795
														At5g46350	18818445	18821267	Complement	MPL12.15	WRKY family transcriptionfactor	4.30233	-1.27523	-0.87572	-1.65034	2.20965	-1.91385	4.30233
														At2g37240	15647018	15648842	Complement	F3G5.3	expressed protein	4.29351	-0.514342	-1.34953	-1.88052	2.93224	-1.63979	4.29351
														At3g21520	7581965	7582799	sense	MIL23.9	expressed protein	4.29272	-1.84155	-2.06864	0.0122383	1.76305	-3.61197	4.29272
														At5g53420	21690756	21692959	sense	MYN8.3	expressed protein	4.2924	-1.4734	-2.65996	0.244436	2.03192	-3.8637	4.2924
														At2g05940	2287235	2289304	Complement	T6P5.14	protein kinase putative	4.29089	-0.995074	-1.68564	-1.18856	2.5383	-2.3893	4.29089
														At2g24570	10444477	10446377	Complement	F25P17.13	WRKY family transcriptionfactor	4.28946	-0.139152	-2.35826	-1.27721	3.33764	-2.15553	4.28946
														At1g22190	7835771	7837277	sense	F16L1.8	AP2 domain-containingtranscription factor putative	4.28735	0.416478	-1.03885	-3.51598	4.06461	-0.531571	4.28735
														At1g03290	807970	810690	sense	F15K9.11	expressed protein	4.28091	0.279626	-0.49337	-4.04548	3.89385	-0.182587	4.28091
														At5g24660	8443282	8443837	Complement	MXC17.2	expressed protein	4.27705	-1.80887	-1.10542	-0.885426	1.73466	-2.62877	4.27705
														At5g04490	1279761	1281670	sense	T32M21.90	phosphatidatecytidylyltransferase family protein	4.27407	-1.4718	-2.39589	0.0620799	1.98354	-3.61832	4.27407
														At1g15790	5438252	5440082	Complement	F7H2.13	expressed protein	4.26187	-0.843829	-0.774465	-2.03148	2.48601	-1.43254	4.26187
														At1g17180	5872142	5873079	sense	F20D23.12	glutathione S-transferaseputative	4.25877	-1.27124	-1.03697	-1.50717	2.23101	-2.05373	4.25877
														At1g07010	2152886	2155717	sense	F10K1.27	calcineurin-like phosphoesterasefamily protein	4.25585	-0.418315	-1.6471	-1.62499	2.98645	-1.81525	4.25585
														At4g14630	8392915	8393802	sense	FCAALL.278	germin-like protein (GLP9)	4.25425	-1.07692	-1.16756	-1.39768	2.26864	-2.01407	4.25425
														At5g38980	15624001	15624579	sense	K15E6.160	expressed protein	4.2457	-1.0966	-0.796578	-1.83344	2.30376	-1.68025	4.2457
														At3g22110	7792645	7794161	Complement	MKA23.2	20S proteasome alpha subunit C(PAC1) (PRC9)	4.22708	-0.898042	-0.131556	-2.92252	2.57584	-0.90136	4.22708
														At3g23220	8288009	8288395	sense	K14B15.13	ethylene-responsiveelement-binding protein putative	4.22691	-1.55793	-0.335588	-1.90532	1.92019	-1.66535	4.22691
														At5g19240	6470131	6471064	sense	T24G5.140	expressed protein	4.22284	0.0922105	-1.70021	-2.26109	3.62828	-1.38169	4.22284
														At5g19540	6595704	6597891	sense	T20D1.60	expressed protein	4.22257	0.375077	-1.51987	-2.77703	3.9585	-0.97359	4.22257
														At4g26070	13217658	13219942	sense	F20B18.180	mitogen-activated proteinkinase kinase (MAPKK) (MKK1) (MEK1)	4.21733	-1.65079	-1.88534	-0.178711	1.78011	-3.28942	4.21733
														At2g40600	16953948	16955615	Complement	T2P4.5	appr-1-p processing enzyme familyprotein	4.21623	-1.51044	-1.45501	-0.729788	1.9142	-2.69927	4.21623
														At2g22470	9545277	9545959	Complement	F14M13.13	arabinogalactan-protein (AGP2)	4.20181	-3.54831	1.8627	-2.38912	0.38568	-1.2817	4.20181
														At3g18980	6546469	6548068	sense	K13E13.9	F-box family protein	4.19932	-0.6777	0.275917	-3.70448	2.79574	-0.352331	4.19932
														At1g13470	4620242	4621539	Complement	F13B4.12	expressed protein	4.19477	-0.997247	-1.4159	-1.33715	2.43386	-2.1503	4.19477
														At5g57050	23104461	23106853	sense	MHM17.19	protein phosphatase 2C ABI2 /PP2C ABI2 / abscisic acid-insensitive 2 (ABI2)	4.1902	-1.92033	-0.0873604	-1.79455	1.59766	-1.75055	4.1902
														At5g42050	16832717	16834521	sense	MJC20.15	expressed protein	4.18509	0.26425	-1.61408	-2.48947	3.79273	-1.1515	4.18509
														At4g39640	18400021	18402946	sense	F23K16.11	gamma-glutamyltranspeptidasefamily protein	4.18463	-0.0344133	-1.06085	-2.82516	3.45522	-0.949217	4.18463
														At3g13350	4335502	4337846	Complement	MDC11.15	high mobility group (HMG1/2)family protein / ARID/BRIGHT DNA-binding domain-containingprotein	4.17234	-1.39129	-0.305127	-2.10718	2.06189	-1.49011	4.17234
														At4g34710	16560067	16562974	Complement	T4L20.290	arginine decarboxylase 2(SPE2)	4.16619	-0.672369	-0.768044	-2.30347	2.69153	-1.26819	4.16619
														At3g12870	4094424	4095044	Complement	MJM20.1	expressed protein	4.16553	-0.852986	-0.668319	-1.94467	2.29896	-1.35099	4.16553
														At1g69260	26042825	26044751	sense	F23O10.16	expressed protein	4.15611	0.334065	-1.27516	-2.98776	3.85468	-0.804589	4.15611
														At4g28740	14200995	14202651	sense	F16A16.150	expressed protein	4.15444	0.0101304	-1.74781	-2.0413	3.4609	-1.49755	4.15444
														At5g24380	8323898	8326528	sense	K16H17.9	transporter putative	4.14885	-1.39778	-0.573789	-1.77731	2.03473	-1.74108	4.14885
														At3g17080	5825295	5825873	sense	K14A17.15	self-incompatibilityprotein-related	4.1487	-0.528833	-0.732497	-2.56012	2.87851	-1.10517	4.1487
														At5g39030	15637296	15639716	sense	MXF12.40	protein kinase family protein	4.14864	-0.361565	-1.56402	-1.88685	3.08433	-1.68226	4.14864
														At1g21450	7508960	7511790	sense	F24J8.8	scarecrow-like transcriptionfactor 1 (SCL1)	4.14235	0.408089	-0.808847	-3.62445	3.93324	-0.340713	4.14235
														At5g10180	3193145	3197121	sense	T31P16.170	sulfate transporter	4.13028	0.147568	-2.24493	-1.57804	3.57939	-1.77662	4.13028
														At1g32960	11945287	11948630	sense	F9L11.13	subtilase family protein	4.12147	-0.982047	-0.809671	-1.97005	2.42526	-1.58073	4.12147
														At1g18390	6327456	6329928	sense	F15H18.25	protein kinase family protein	4.11399	-0.512683	-1.25805	-1.97033	2.86966	-1.55505	4.11399
														At2g15390	6716343	6718117	Complement	F26H6.9	xyloglucan fucosyltransferaseputative (FUT4)	4.10315	-0.810941	-0.934765	-1.98008	2.56152	-1.53921	4.10315
														At3g47910	17687622	17692715	Complement	T17F15.220	expressed protein	4.10291	0.398512	-1.4869	-2.76664	3.88801	-0.925914	4.10291
														At5g66490	26564453	26564994	Complement	K1F13.15	expressed protein	4.10033	-0.115366	-1.10547	-2.54944	3.26699	-1.06074	4.10033
														At3g26440	9678219	9680978	sense	F20C19.17	expressed protein	4.09503	-0.837623	-1.05004	-1.79139	2.50578	-1.66982	4.09503
														At4g39955	18530537	18532253	sense	T5J17.4	hydrolase alpha/beta fold familyprotein	4.0784	-1.00058	-1.81753	-0.874651	2.36811	-2.52087	4.0784
														At1g16510	5644565	5645436	Complement	F3O9.31	auxin-responsive family protein	4.07365	-0.775483	-0.327237	-2.70692	2.59132	-0.966366	4.07365
														At4g37930	17831740	17834859	Complement	F20D10.50	glycinehydroxymethyltransferase / serine hydroxymethyltransferase/ serine/threonine aldolase (SHM1)	4.06381	-0.376694	-2.05959	-1.1796	2.91927	-2.13662	4.06381
														At1g72770	27393720	27396943	sense	F28P22.4	protein phosphatase 2C P2C-HA /PP2C P2C-HA (P2C-HA)	4.06317	-1.04347	0.348986	-3.1081	2.22621	-0.602364	4.06317
														At5g49520	20108002	20110572	sense	K6M13.6	WRKY family transcription factor	4.03841	-0.713496	-2.09636	-0.779896	2.54215	-2.51078	4.03841
														At4g35600	16896242	16898881	sense	F8D20.110	protein kinase family protein	4.02478	0.215613	-0.949224	-3.14207	3.61712	-0.631622	4.02478
														At3g49130	18221438	18222693	sense	T2J13.30	hypothetical protein	4.02047	-0.591304	-1.75139	-1.30606	2.72227	-2.06627	4.02047
														At4g31800	15383209	15385035	sense	F28M20.1	WRKY family transcriptionfactor	4.01959	0.487192	-2.05192	-2.18831	3.92754	-1.316	4.01959
														At4g38810	18115277	18119071	Complement	T9A14.90	calcium-binding EF hand familyprotein	4.0186	-1.45878	-0.910362	-1.23918	1.87653	-2.11225	4.0186
														At2g04795	1682950	1683472	sense	F28I8.10	expressed protein	4.01497	-0.125212	-1.38101	-2.17448	3.20648	-1.30709	4.01497
														At2g30770	13116871	13119088	Complement	T11J7.16	cytochrome P450 71A13 putative(CYP71A13)	4.01022	-1.11298	-1.02664	-1.41091	2.14683	-1.90699	4.01022
														At5g57040	23101131	23102472	Complement	MHM17.18	lactoylglutathione lyase familyprotein / glyoxalase I family protein	4.00721	0.103021	-0.900593	-3.01754	3.47173	-0.688782	4.00721
														At1g27770	9671625	9676144	Complement	F28L5.1	calcium-transporting ATPase 1plasma membrane-type / Ca(2+)-ATPase isoform 1 (ACA1) /plastid envelope ATPase 1 (PEA1)	4.00272	-0.43535	-2.78699	-0.484672	2.85531	-2.82726	4.00272
														At5g01750	289762	291323	sense	T20L15.20	expressed protein	3.99719	-0.927112	-2.03973	-0.724161	2.4197	-2.64189	3.99719
														At4g14220	8195876	8198537	sense	FCAALL.146	zinc finger (C3HC4-type RINGfinger) family protein	3.9925	-0.967645	-1.76117	-0.78853	2.24773	-2.46178	3.9925
														At3g62920	23271692	23272268	sense	T20O10.20	expressed protein	3.9741	-0.785903	-0.0919516	-2.85834	2.47467	-0.769334	3.9741
														At2g26190	11154717	11157588	Complement	T1D16.17	calmodulin-binding familyprotein	3.96604	-0.685403	-3.27386	0.200313	2.5542	-3.54442	3.96604
														At5g13110	4158814	4161823	sense	T19L5.70	glucose-6-phosphate1-dehydrogenase putative / G6PD putative	3.95939	-1.17496	0.0815513	-2.59355	2.0915	-0.9553	3.95939
														At3g48640	18032635	18033309	Complement	T8P19.150	expressed protein	3.95673	0.243836	-3.08483	-0.895946	3.5806	-2.36746	3.95673
														At2g20960	9013729	9016844	sense	F5H14.49	expressed protein	3.95338	-0.414756	-1.0794	-2.17553	2.87488	-1.30696	3.95338
														At3g10890	3407460	3409005	Complement	T7M13.3	(1-4)-beta-mannan endohydrolaseputative	3.94932	-1.3237	-2.17493	-0.0943197	1.94781	-3.20604	3.94932
														At1g52590	19592678	19593942	Complement	F6D8.19	expressed protein	3.94795	-0.77667	-0.671172	-2.14821	2.46369	-1.27268	3.94795
														At2g47130	19356606	19357591	Complement	F14M4.4	short-chaindehydrogenase/reductase (SDR) family protein	3.94656	-1.23802	-1.08064	-1.2934	2.07451	-2.06005	3.94656
														At2g32290	13721624	13724006	Complement	T32F6.19	beta-amylase putative /14-alpha-D-glucan maltohydrolase putative	3.94397	-1.08936	-1.07207	-1.38714	2.1579	-1.9234	3.94397
														At5g06320	1930625	1931769	Complement	MHF15.16	harpin-induced family protein /HIN1 family protein / harpin-responsive family protein /NDR1/HIN1-like protein 3	3.93959	-0.226828	-2.891	-0.625991	3.07929	-2.69868	3.93959
														At4g01010	434569	437242	Complement	F3I3.1	cyclic nucleotide-regulated ionchannel putative (CNGC13)	3.93824	-0.615422	-0.241438	-2.83175	2.60937	-0.750206	3.93824
														At2g28305	12088190	12091741	sense	T3B23.2	expressed protein	3.93767	-2.04788	-0.911346	-0.630711	1.33725	-2.65395	3.93767
														At3g59660	22045155	22049634	Complement	T16L24.210	C2 domain-containing protein /GRAM domain-containing protein	3.93462	-0.937431	-0.705878	-1.89993	2.27347	-1.45141	3.93462
														At2g04050	1337383	1339267	Complement	F3L12.12	MATE efflux family protein	3.93207	-1.06376	-1.02314	-1.45432	2.17619	-1.85351	3.93207
														At1g22240	7853073	7854952	sense	F16L1.3	pumilio/Puf RNA-bindingdomain-containing protein	3.93069	-2.12594	-2.0041	0.542925	1.22958	-3.92863	3.93069
														At3g51860	19250404	19253856	sense	ATEM1.11	cation exchanger putative(CAX3)	3.9119	0.420925	-0.627007	-3.6846	3.75809	-0.174536	3.9119
														At1g63880	23715939	23719787	Complement	T12P18.10	disease resistance protein(TIR-NBS-LRR class) putative	3.90519	-0.874809	-1.54101	-1.11462	2.34167	-2.15157	3.90519
														At5g56970	23062170	23065494	Complement	MHM17.8	FAD-binding domain-containingprotein / cytokinin oxidase family protein	3.90503	-1.39224	-0.417728	-1.67872	1.81155	-1.59428	3.90503
														At4g25810	13128655	13129893	sense	F14M19.90	xyloglucan:xyloglucosyltransferase putative / xyloglucan endotransglycosylaseputative / endo-xyloglucan transferase putative (XTR6)	3.90117	-0.940438	-0.887572	-1.64559	2.2284	-1.62071	3.90117
														At2g19650	8500557	8502897	Complement	F3P11.25	DC1 domain-containing protein	3.89968	-1.28064	-1.31281	-0.871341	1.91033	-2.34032	3.89968
														At1g70690	26655676	26657287	sense	F5A18.13	kinase-related	3.8892	-1.29089	0.572503	-3.01624	1.97184	-0.623442	3.8892
														At4g32770	15804956	15807987	sense	F4D11.30	tocopherol cyclase chloroplast/ vitamin E deficient 1 (VTE1) / sucrose export defective1 (SXD1)	3.8872	-0.583443	-0.616515	-2.42735	2.64361	-1.05119	3.8872
														At5g01550	214516	216582	Complement	F7A7.70	lectin protein kinase putative	3.88185	0.167104	-1.11592	-2.72404	3.43581	-0.816765	3.88185
														At5g62480	25105944	25106819	Complement	K19B1.9	glutathione S-transferaseputative	3.87812	-0.0452776	-1.34721	-2.1652	3.17559	-1.20529	3.87812
														At1g16670	5697332	5699762	sense	F19K19.4	protein kinase family protein	3.87722	0.0417025	-0.241828	-3.64245	3.25658	-0.173203	3.87722
														At3g22570	8000522	8001245	Complement	F16J14.13	protease inhibitor/seedstorage/lipid transfer protein (LTP) family protein	3.87643	-1.53089	-1.57827	-0.374692	1.69568	-2.83825	3.87643
														At1g65610	24395342	24399023	Complement	F5I14.14	endo-14-beta-glucanaseputative / cellulase putative	3.86998	-1.22393	-0.453725	-1.84402	1.98182	-1.47738	3.86998
														At3g11240	3518490	3521121	Complement	F11B9.16	arginine-tRNA-proteintransferase putative / arginyltransferase putative /arginyl-tRNA-protein transferase putative	3.86892	-0.573369	0.0976305	-3.27509	2.62109	-0.416873	3.86892
														At2g28890	12412673	12415312	Complement	F8N16.18	protein phosphatase 2C familyprotein / PP2C family protein	3.86829	-2.08894	-1.82383	0.445672	1.16052	-3.76434	3.86829
														At2g19130	8300815	8303357	sense	T20K24.15	S-locus lectin protein kinasefamily protein	3.86405	-0.78068	-1.541	-1.20934	2.42962	-2.0564	3.86405
														At1g64060	23773437	23780594	sense	F22C12.18	respiratory burst oxidaseprotein F (RbohF) (RbohAp108) / NADPH oxidase	3.85473	-0.609413	-0.712343	-2.17927	2.54101	-1.16023	3.85473
														At2g20630	8903993	8906979	Complement	F23N11.5	protein phosphatase 2C putative/ PP2C putative	3.85373	-1.56745	0.710669	-2.81657	1.68957	-0.735787	3.85373
														At2g04350	1515802	1519304	sense	T1O3.24	long-chain-fatty-acid--CoA ligasefamily protein / long-chain acyl-CoA synthetase familyprotein (LACS8)	3.85253	-0.101708	-0.133403	-3.58279	3.10086	-0.204946	3.85253
														At2g45740	18846667	18848473	sense	F4I18.28	peroxisomal biogenesis factor 11family protein / PEX11 family protein	3.85031	0.159625	-1.41007	-2.37239	3.40744	-1.07505	3.85031
														At4g03410	1501167	1503560	sense	F4C21.37	peroxisomal membraneprotein-related	3.84787	0.534414	-0.739597	-3.61668	3.84591	-0.172469	3.84787
														At4g27990	13923779	13924698	Complement	T13J8.100	YGGT family protein	3.83278	0.211499	-0.850615	-3.05818	3.44877	-0.550087	3.83278
														At1g67070	25045956	25048250	sense	F1O19.12	phosphomannose isomeraseputative (DIN9)	3.8196	-0.734894	0.193235	-3.10572	2.37813	-0.473591	3.8196
														At3g46830	17257329	17259682	Complement	T6H20.140	Ras-related protein (RAB11A) /small GTP-binding protein putative	3.81546	-1.17077	-0.165162	-2.11604	1.93594	-1.17086	3.81546
														At5g20150	6802374	6803627	sense	F5O24.40	SPX (SYG1/Pho81/XPR1)domain-containing protein	3.80957	0.050119	-1.43582	-2.19441	3.25792	-1.19567	3.80957
														At2g42360	17647876	17648866	sense	MHK10.8	zinc finger (C3HC4-type RINGfinger) family protein	3.80877	-1.24921	-0.828573	-1.40093	1.9416	-1.84203	3.80877
														At1g16730	5726610	5727305	Complement	F17F16.6	expressed protein	3.80696	-0.545528	-0.645341	-2.36434	2.61728	-1.04317	3.80696
														At1g67920	25477207	25477803	sense	T23K23.23	expressed protein	3.7952	0.000476981	-0.422641	-3.30045	3.19001	-0.366125	3.7952
														At4g23200	12145391	12147945	Complement	F21P8.90	protein kinase family protein	3.79402	-1.00745	-0.603035	-1.85658	2.13139	-1.42056	3.79402
														At1g30250	10646971	10647495	Complement	F12P21.5	expressed protein	3.79095	-0.983787	-0.777892	-1.54239	2.04417	-1.56588	3.79095
														At1g23310	8268405	8271888	Complement	F26F24.16	glutamate:glyoxylateaminotransferase 1 (GGT1)	3.78581	-0.776945	-3.35402	0.484668	2.32356	-3.73838	3.78581
														At1g06650	2035838	2037362	sense	F12K11.26	2-oxoglutarate-dependentdioxygenase putative	3.77933	0.203904	-1.06997	-2.76226	3.40161	-0.745454	3.77933
														At2g01180	106899	108785	Complement	F10A8.6	phosphatidic acid phosphatasefamily protein / PAP2 family protein	3.77645	-0.0966481	-1.37346	-2.06785	3.0708	-1.27496	3.77645
														At1g16530	5651463	5652832	Complement	F19K19.22	LOB domain protein 3 / lateralorgan boundaries domain protein 3 (LBD3)	3.76566	-0.946175	-0.959652	-1.47435	2.13466	-1.69306	3.76566
														At1g50320	18642098	18643196	Complement	F14I3.8	thioredoxin x	3.76246	-0.462222	-1.39772	-1.62581	2.67923	-1.63046	3.76246
														At5g20960	7116740	7122776	sense	F22D1.130	aldehyde oxidase 1 (AAO1)	3.76072	-1.31133	-1.30832	-0.732199	1.78542	-2.36787	3.76072
														At1g71100	26818294	26819333	sense	F23N20.9	ribose 5-phosphateisomerase-related	3.75485	0.430849	-1.22385	-2.81036	3.63537	-0.675383	3.75485
														At4g04220	2033425	2035944	sense	T27D20.9	disease resistance familyprotein	3.75243	-1.35809	-1.705	-0.174658	1.62036	-2.87147	3.75243
														At1g18590	6398572	6399934	sense	F25I16.7	sulfotransferase family protein	3.74825	-1.28328	-1.67685	-0.479206	1.87439	-2.66808	3.74825
														At4g16760	9424655	9428875	Complement	FCAALL.119	acyl-CoA oxidase (ACX1)	3.74382	-0.243383	-1.03821	-2.20119	2.8747	-1.11675	3.74382
														At3g27080	9986319	9987866	Complement	MOJ10.22	mitochondrial import receptorsubunit TOM20-3 / translocase of outer membrane 20 kDasubunit 3 (TOM20-3)	3.74315	1.11646	0.107999	-5.84594	4.4866	1.06882	0
														At1g65730	24446167	24449954	sense	F1E22.10	oligopeptide transporter OPTfamily protein	3.74859	0.829612	-1.06581	-3.50204	4.1203	-0.193673	0
														At3g10450	3249536	3252511	sense	F13M14.27	serine carboxypeptidase S10family protein	3.75987	0.717485	-0.602049	-3.99123	3.98412	0.104938	0
														At5g59820	24120198	24121013	sense	MMN10.11	zinc finger (C2H2 type) familyprotein (ZAT12)	3.76822	1.51019	-2.01362	-3.21832	5.06459	-0.394293	0
														At5g19550	6598108	6601821	sense	T20D1.70	aspartate aminotransferasecytoplasmic isozyme 1 / transaminase A (ASP2)	3.78165	0.607404	-1.49147	-2.6926	3.89006	-0.740906	0
														At3g08820	2677124	2679185	Complement	F17O14.29	pentatricopeptide (PPR)repeat-containing protein	3.78211	-0.271579	0.879217	-4.69209	2.90052	0.522246	0
														At1g10760	3581035	3590044	Complement	F20B24.24	starch excess protein (SEX1)	3.7904	-1.45691	-3.45834	1.24415	1.69288	-4.76097	0
														At5g13180	4196579	4197851	sense	T19L5.140	no apical meristem (NAM) familyprotein	3.79278	0.18446	0.32822	-4.58158	3.39087	0.446341	0
														At2g33580	14226699	14228937	Complement	F4P9.35	protein kinase family protein /peptidoglycan-binding LysM domain-containing protein	3.7942	0.664344	-2.33455	-1.90884	3.95766	-1.37985	0
														At2g36145	15175620	15176585	sense	F9C22.7	expressed protein	3.80388	-1.43395	-3.07368	0.931783	1.68941	-4.36652	0
														At3g03890	999474	1002491	Complement	F20H23.6	expressed protein	3.80828	1.32255	-0.318722	-5.63487	4.92257	0.866497	0
														At3g61860	22911047	22913309	Complement	F21F14.30	arginine/serine-rich splicingfactor RSP31 (RSP31)	3.84566	2.33555	-0.465984	-6.93401	6.178	1.59235	0
														At3g44830	16379875	16383341	sense	F28D10.20	lecithin:cholesterolacyltransferase family protein / LACT family protein	3.84681	1.42344	-0.120986	-5.91089	4.90321	1.13307	0
														At3g49160	18232979	18235870	Complement	F2K15.20	pyruvate kinase family protein	3.85876	1.37117	-0.172502	-5.86961	4.90633	1.0419	0
														At5g56150	22746408	22748409	sense	MDA7.21	ubiquitin-conjugating enzymeputative	3.86185	0.372751	0.653726	-5.85282	3.65902	0.897406	0
														At5g24150	8172369	8175434	Complement	MLE8.1	squalene monooxygenase 11 /squalene epoxidase 11 (SQP11)	3.87141	1.43367	0.524279	-8.41194	5.10429	1.7282	0
														At2g16430	7127501	7129901	Complement	F16F14.7	purple acid phosphatase (PAP10)	3.87864	0.825837	-1.36334	-3.20202	4.28342	-0.444178	0
														At1g02820	623782	624474	Complement	F22D16.18	late embryogenesis abundant 3family protein / LEA3 family protein	3.88009	-2.37898	2.89208	-4.54204	1.05296	0.372333	0
														At5g49570	20129085	20133411	Complement	K6M13.12	transglutaminase-like familyprotein	3.88066	0.542354	-0.91139	-3.38285	3.91444	-0.30997	0
														At3g53930	19977330	19981791	sense	F5K20.230	protein kinase family protein	3.88419	1.25453	-0.872003	-4.5302	4.83295	0.332306	0
														At3g03470	824559	826444	Complement	T21P5.11	cytochrome P450 putative	3.8985	2.39877	-0.0769198	-8.26169	6.39069	2.00047	0
														At1g69450	26110783	26113444	Complement	F10D13.27	early-responsive to dehydrationprotein-related / ERD protein-related	3.91258	0.304914	0.218942	-4.75402	3.62321	0.456823	0
														At1g80180	30161718	30162476	Complement	F18B13.26	expressed protein	3.91713	1.97492	0.300788	-8.06066	5.69513	1.99353	0
														At1g23130	8200372	8201223	sense	T26J12.10	Bet v I allergen familyprotein	3.92306	5.16248	-3.06268	-6.48852	13.284	1.34697	0
														At1g22400	7903649	7906662	Complement	F12K8.26	UDP-glucoronosyl/UDP-glucosyltransferase family protein	3.92668	3.81616	-1.97069	-6.68487	9.58589	1.36776	0
														At3g10390	3229298	3231824	sense	F13M14.34	amine oxidase family protein /SWIRM domain-containing protein	3.9387	1.61513	0.0969601	-7.29426	5.39618	1.49158	0
														At5g58350	23602401	23605027	sense	MCK7.22	protein kinase family protein	3.93892	1.66252	0.502799	-8.03025	5.32005	1.90714	0
														At5g43440	17472461	17473885	Complement	MWF20.15	2-oxoglutarate-dependentdioxygenase putative	3.94687	1.10752	-1.08301	-4.05692	4.69111	0.0290517	0
														At5g14940	4831751	4834315	Complement	F2G14.60	proton-dependent oligopeptidetransport (POT) family protein	3.95224	1.40902	0.169973	-6.83035	5.04895	1.38111	0
														At4g36990	17440287	17442145	sense	AP22.9	heat shock factor protein 4 (HSF4)/ heat shock transcription factor 4 (HSTF4)	3.95426	0.639402	-1.61794	-2.81061	4.04515	-0.825169	0
														At3g05200	1476988	1478736	sense	T12H1.17	zinc finger (C3HC4-type RINGfinger) family protein (ATL6)	3.96003	1.08519	-0.983285	-4.16958	4.5969	0.0946279	0
														At2g36630	15359570	15362213	Complement	F1O11.14	expressed protein	3.96066	-0.0824957	0.974485	-5.42743	3.22707	0.770487	0
														At3g56260	20878950	20880003	Complement	F18O21.220	expressed protein	3.9607	0.0436871	0.397822	-4.62138	3.38507	0.383185	0
														At1g13990	4794761	4796594	sense	F7A19.8	expressed protein	3.96713	2.28245	0.982613	-11.4651	6.16098	2.91879	0
														At3g52155	19354673	19355827	sense	F4F15.1	expressed protein	3.98805	-2.83985	-2.78798	1.84923	0.722847	-5.92337	0
														At2g27150	11608832	11614239	sense	F20F1.2	aldehyde oxidase 3 (AAO3)	3.99078	0.892458	0.178475	-5.76915	4.39642	0.935517	0
														At4g38970	18163490	18165734	Complement	F19H22.70	fructose-bisphosphate aldolaseputative	4.00889	-2.70586	-4.6746	3.32926	0.901291	-8.02567	0
														At5g42250	16911237	16914844	sense	K5J14.6	alcohol dehydrogenase putative	4.01028	-0.304256	2.0069	-7.02832	3.03754	1.44834	0
														At4g17840	9918067	9920488	Complement	T6K21.20	expressed protein	4.04352	0.0690665	0.674973	-5.35997	3.44691	0.645784	0
														At2g40890	17065131	17067730	Complement	T20B5.9	cytochrome P450 98A3 putative(CYP98A3)	4.04421	-2.22062	-2.72016	1.16777	1.25901	-4.82012	0
														At2g30490	13000740	13002847	Complement	T6B20.16	trans-cinnamate 4-monooxygenase/ cinnamic acid 4-hydroxylase (C4H) (CA4H) / cytochromeP450 73 (CYP73) (CYP73A5)	4.04489	-3.67206	-2.81006	2.56398	0.210126	-7.03719	0
														At1g54040	20174383	20177617	Complement	F15I1.12	kelch repeat-containing protein	4.04837	-2.76434	-3.69454	2.52368	0.871188	-6.74866	0
														At2g38870	16243459	16244358	Complement	T7F6.4	protease inhibitor putative	4.07374	-3.89624	-3.39794	3.31175	0.0878183	-8.66837	0
														At1g68830	25876119	25879169	Complement	F14K14.6	protein kinase family protein	4.08643	-0.00592027	0.164355	-4.39525	3.393	0.137382	0
														At5g38900	15590735	15592848	Complement	K15E6.80	DSBA oxidoreductase familyprotein	4.09659	-2.44863	-2.1345	0.855543	1.05359	-4.51427	0
														At5g67600	26976797	26977535	Complement	K9I9.17	expressed protein	4.09937	-0.200559	0.524894	-4.69763	3.16444	0.278946	0
														At3g05360	1530741	1533294	Complement	F22F7.23	disease resistance familyprotein / LRR family protein	4.10495	0.702719	-0.271197	-4.85117	4.26654	0.378668	0
														At1g62180	22979195	22981267	Complement	F19K23.11	5'-adenylylsulfate reductase 2chloroplast (APR2) (APSR) / adenosine 5'-phosphosulfate5'-adenylylsulfate (APS) sulfotransferase 2 /3'-phosphoadenosine-5'-phosphosulfate (PAPS) reductasehomolog 43 (PRH-43)	4.1059	-2.80364	-2.69831	1.62057	0.870492	-5.45606	0
														At2g25000	10636829	10638485	sense	F27C12.8	WRKY family transcriptionfactor	4.10629	-2.16394	-2.67912	1.01454	1.36443	-4.65228	0
														At1g02390	480852	483292	sense	T6A9.8	phospholipid/glycerolacyltransferase family protein	4.11471	2.95236	-0.887763	-7.68932	7.55406	1.7127	0
														At2g23840	10160877	10162680	Complement	T29E15.4	HNH endonucleasedomain-containing protein	4.12195	0.826044	-0.979257	-3.9612	4.45989	-0.125073	0
														At2g30140	12879211	12880897	sense	T27E13.12	UDP-glucoronosyl/UDP-glucosyltransferase family protein	4.12216	0.858454	1.11934	-7.80346	4.45332	1.74214	0
														At2g16740	7274804	7276024	sense	T24I21.15	ubiquitin-conjugating enzymeputative	4.14461	1.31679	-0.164431	-6.33937	5.19675	0.999776	0
														At1g31820	11416432	11418147	Complement	F5M6.17	amino acid permease familyprotein	4.14606	1.01133	0.200452	-6.29744	4.69445	1.06024	0
														At1g62760	23241239	23242177	Complement	F23N19.12	invertase/pectin methylesteraseinhibitor family protein	4.17424	1.06541	0.00777039	-6.01593	4.78497	0.93653	0
														At1g07640	2354351	2355984	Complement	F24B9.30	Dof-type zinc fingerdomain-containing protein	4.19278	1.01302	-1.29669	-3.86198	4.79639	-0.23049	0
														At5g47070	19135770	19138136	Complement	MQD22.21	protein kinase putative	4.20767	0.279694	-0.202973	-4.39151	3.83332	0.0686407	0
														At3g51420	19095014	19096837	sense	F26O13.60	strictosidine synthase familyprotein	4.24337	-2.73048	-2.49773	1.30311	0.969933	-5.24632	0
														At5g48380	19621315	19624235	Complement	K23F3.10	leucine-rich repeat familyprotein / protein kinase family protein	4.27885	0.868345	-1.04221	-4.10457	4.64905	-0.140917	0
														At1g62300	23020348	23022944	Complement	F19K23.22	WRKY family transcriptionfactor	4.29042	-0.119175	0.558784	-5.00246	3.46287	0.379848	0
														At4g15210	8666338	8669470	Complement	FCAALL.97	beta-amylase (BMY1) /14-alpha-D-glucan maltohydrolase	4.32496	-5.66381	-1.87921	2.91389	-0.77618	-7.78627	0
														At3g24160	8726138	8729396	sense	MUJ8.6	expressed protein	4.35138	0.469377	0.123576	-5.37627	4.18246	0.518377	0
														At3g57650	21360491	21364151	sense	F15B8.160	acyl-CoA:1-acylglycerol-3-phosphate acyltransferaseputative	4.35794	0.904313	-0.348412	-5.35656	4.78241	0.483613	0
														At1g32900	11920371	11923746	Complement	F9L11.8	starch synthase putative	4.36851	-2.3676	-4.06816	2.18303	1.35908	-6.74828	0
														At5g24120	8157554	8160231	Complement	MZF18.19	RNA polymerase sigma subunitSigE (sigE) / sigma-like factor (SIG5)	4.39038	0.448726	-0.0218904	-5.16275	4.19592	0.372681	0
														At3g11800	3726114	3727734	sense	F26K24.9	expressed protein	4.39393	0.556154	-0.589089	-4.43206	4.33529	-0.0233152	0
														At1g71040	26800628	26803984	Complement	F23N20.3	multi-copper oxidase type Ifamily protein	4.42052	0.548146	-0.447058	-4.63453	4.33877	0.0908639	0
														At1g05340	1558849	1559757	Complement	YUP8H12.4	expressed protein	4.45117	0.237723	1.28098	-7.70701	3.98055	1.32151	0
														At1g64360	23891533	23892167	sense	F15H21.8	expressed protein	4.45388	3.03315	-0.744327	-8.76243	8.11429	1.90487	0
														At1g06830	2097150	2097654	sense	F4H5.9	glutaredoxin family protein	4.47409	0.255229	-0.0909846	-4.79965	4.02397	0.144395	0
														At2g23150	9863272	9865652	Complement	F21P24.20	NRAMP metal ion transporter 3(NRAMP3)	4.48164	-0.00408789	0.149213	-4.78521	3.70404	0.125843	0
														At3g27880	10339449	10340673	sense	K16N12.10	expressed protein	4.49783	0.864362	-0.796521	-4.72179	4.96128	0.0649651	0
														At5g46780	18996204	18997284	sense	MZA15.20	VQ motif-containing protein	4.50804	1.47284	-1.80252	-4.1255	5.8364	-0.25708	0
														At2g41640	17367574	17369613	sense	T32G6.16	expressed protein	4.5289	0.916931	-0.887109	-4.66086	4.92701	0.0327712	0
														At5g24530	8378836	8383404	sense	K18P6.6	oxidoreductase 2OG-Fe(II)oxygenase family protein	4.53292	0.504032	-0.141661	-5.20344	4.37909	0.317902	0
														At1g45145	17077382	17078761	Complement	F27F5.21	thioredoxin H-type 5 (TRX-H-5)(TOUL)	4.53582	0.760602	-0.312861	-5.25422	4.69145	0.390364	0
														At1g68570	25750400	25753938	sense	F24J5.19	proton-dependent oligopeptidetransport (POT) family protein	4.54579	3.0388	-2.26966	-5.74341	8.7329	0.59973	0
														At5g33290	12575486	12579250	sense	T29A4.1	exostosin family protein	4.54674	1.84027	-1.07596	-5.85208	6.28964	0.65035	0
														At4g27410	13707246	13709128	Complement	F27G19.10	no apical meristem (NAM) familyprotein (RD26)	4.55994	1.21129	0.524719	-7.88289	5.31083	1.52339	0
														At3g14595	4908957	4910483	sense	MIE1.24	expressed protein	4.57786	1.02139	0.440515	-7.25449	5.07259	1.28009	0
														At5g59310	23942311	23943078	Complement	MNC17.4	lipid transfer protein 4 (LTP4)	4.58124	-3.52385	-5.88423	4.70995	0.68779	-11.9945	0
														At4g23680	12336196	12337486	Complement	F9D16.150	major latex protein-related /MLP-related	4.58255	3.00361	-8.03316	-1.07809	8.3964	-2.71429	0
														At5g53550	21773307	21776002	sense	MNC6.9	transporter putative	4.58695	1.39026	-0.887609	-5.42199	5.58283	0.43509	0
														At5g53370	21666758	21668819	Complement	K19E1.17	pectinesterase family protein	4.60043	1.29246	-2.20002	-3.50505	5.49303	-0.734969	0
														At1g77920	29303299	29305757	sense	F28K19.13	bZIP family transcriptionfactor	4.61581	-0.694611	1.30365	-5.64294	3.08901	0.513833	0
														At4g28490	14077863	14081177	sense	F20O9.180	leucine-rich repeattransmembrane protein kinase putative	4.6215	1.94456	-1.52562	-5.32825	6.50174	0.356609	0
														At1g52080	19372800	19375734	sense	F5F19.14	actin binding protein family	4.64211	2.11629	-1.66854	-5.41741	6.92686	0.377253	0
														At1g21550	7553090	7553865	Complement	F24J8.15	calcium-binding proteinputative	4.64679	1.17466	-3.90317	-1.7651	5.34534	-2.14054	0
														At2g25625	10913532	10914366	sense	F3N11.22	expressed protein	4.65226	1.2397	1.05303	-9.68928	5.42385	2.02827	0
														At4g27830	13861743	13864506	Complement	T27E11.70	glycosyl hydrolase family 1protein	4.66629	0.733769	-0.816111	-4.59381	4.84744	-0.0658785	0
														At1g68620	25769610	25770903	sense	F24J5.14	expressed protein	4.69644	0.502408	0.6657	-6.76252	4.51352	1.01977	0
														At3g18215	6240890	6242577	sense	MRC8.22	expressed protein	4.72273	-0.605495	1.01251	-5.41532	3.26173	0.344971	0
														At1g75270	28253736	28255010	Complement	F22H5.1	dehydroascorbate reductaseputative	4.7519	-2.17962	-2.56645	0.637357	1.58201	-4.79363	0
														At3g44680	16237549	16240906	Complement	T18B22.80	histone deacetylase putative	4.76819	-2.79796	-2.51774	0.958025	1.29216	-5.17456	0
														At1g55450	20708593	20710556	Complement	T5A14.14	embryo-abundant protein-related	4.77412	2.33881	-4.19903	-2.8295	7.62366	-1.29495	0
														At1g08930	2873493	2877226	sense	F7G19.19	early-responsive to dehydrationstress protein (ERD6) / sugar transporter family protein	4.79632	0.778987	-0.174574	-6.22229	5.06495	0.52698	0
														At1g23090	8184941	8189020	Complement	T26J12.13	sulfate transporter putative	4.79833	2.20529	-0.911085	-7.26641	7.27574	1.08912	0
														At2g02390	628937	631113	sense	T16F16.18	glutathione S-transferase zeta1 (GSTZ1) (GST18)	4.80807	0.990312	0.067004	-7.11218	5.33807	0.922408	0
														At4g16000	9063857	9064493	Complement	FCAALL.25	expressed protein	4.84342	1.18563	0.0513299	-7.10927	5.53361	1.07893	0
														At5g38530	15441269	15443700	sense	MBB18.6	tryptophan synthase-related	4.87235	-2.84926	-3.32591	1.74321	1.19258	-6.99468	0
														At3g01500	194740	197981	Complement	F4P13.5	carbonic anhydrase 1 chloroplast/ carbonate dehydratase 1 (CA1)	4.8909	-3.93299	-6.39859	5.30889	0.590583	-16.3851	0
														At4g33670	16169051	16171482	Complement	T16L1.160	L-galactose dehydrogenase(L-GalDH)	4.90617	1.49856	-2.48268	-3.69598	6.08757	-0.78619	0
														At2g47190	19383272	19384601	sense	T8I13.3	myb family transcription factor(MYB2)	4.93966	1.28674	-0.960081	-5.56966	5.86126	0.28484	0
														At3g17770	6081677	6085963	Complement	MIG5.7	dihydroxyacetone kinase familyprotein	4.94119	1.16204	-0.884784	-5.4731	5.63163	0.24392	0
														At4g11570	7004327	7006075	sense	F25E4.190	haloacid dehalogenase-likehydrolase family protein	4.95563	0.449668	0.149934	-6.07796	4.66088	0.523712	0
														At5g48540	19686190	19687146	Complement	MJE7.18	33 kDa secretory protein-related	4.95638	2.09811	-3.63809	-3.2349	7.205	-1.14034	0
														At5g17990	5957215	5959906	sense	MCM23.6	anthranilatephosphoribosyltransferase	5.01441	-0.770026	-4.99036	0.774731	3.21457	-5.18157	0
														At5g22860	7639359	7642987	Complement	MRN17.9	serine carboxypeptidase S28family protein	5.04108	0.876154	0.646475	-8.37876	5.32006	1.33516	0
														At2g45210	18648640	18649778	sense	F4L23.28	auxin-responsiveprotein-related	5.0815	0.348096	0.382699	-6.49149	4.63361	0.637136	0
														At2g41380	17259019	17260135	sense	F13H10.7	embryo-abundant protein-related	5.10904	1.07667	0.125632	-8.00332	5.77387	1.04784	0
														At4g38550	18025653	18028794	sense	F20M13.110	expressed protein	5.15304	1.22078	-1.91374	-4.24691	5.92576	-0.566176	0
														At3g02150	391098	392765	sense	F14P3.20	TCP family transcription factorputative	5.29589	1.25085	-1.02804	-5.79111	6.16575	0.19774	0
														At3g21660	7624502	7626661	Complement	MIL23.23	UBX domain-containing protein	5.33884	1.0516	-1.41248	-4.81985	5.94734	-0.29503	0
														At1g77760	29240697	29244339	Complement	T32E8.9	nitrate reductase 1 (NR1)	5.39658	0.54965	0.0712121	-6.61344	5.16125	0.541673	0
														At4g30490	14899041	14902150	Complement	F17I23.170	AFG1-like ATPase familyprotein	5.40452	0.0362059	0.224233	-6.01641	4.42932	0.226104	0
														At5g19440	6556422	6558344	sense	F7K24.190	cinnamyl-alcohol dehydrogenaseputative (CAD)	5.41369	-5.2734	-4.03246	3.99514	0.0530031	-13.2334	0
														At5g43450	17474359	17476025	Complement	MWF20.16	2-oxoglutarate-dependentdioxygenase putative	5.4355	1.05626	-0.126657	-7.37998	5.94235	0.80939	0
														At2g26440	11254461	11256562	sense	T9J22.11	pectinesterase family protein	5.52831	-4.22114	-4.31888	3.28158	0.717105	-11.5555	0
														At4g10120	6314910	6319932	sense	F28M11.40	sucrose-phosphate synthaseputative	5.53354	1.29095	-0.363817	-7.61574	6.48026	0.802332	0
														At5g35970	14136124	14140570	Complement	MEE13.8	DNA-binding protein putative	5.77615	1.06395	-1.09166	-5.82876	6.28231	-0.0160654	0
														At4g25000	12851979	12853855	Complement	F13M23.140	alpha-amylase putative /14-alpha-D-glucan glucanohydrolase putative	5.80668	1.22471	-0.654236	-7.14172	6.67474	0.493434	0
														At1g09500	3066701	3068600	sense	F14J9.16	cinnamyl-alcohol dehydrogenasefamily / CAD family	6.07507	1.14093	-0.446575	-7.47502	6.59687	0.602557	0
														At5g38710	15518570	15521129	sense	MKD10.10	proline oxidase putative /osmotic stress-responsive proline dehydrogenase putative	6.23337	0.995299	-0.285322	-7.86508	6.55376	0.618381	0
														At2g29350	12607991	12609633	sense	F16P2.27	tropinone reductase putative /tropine dehydrogenase putative	6.27657	1.22131	-3.21748	-3.57459	7.01068	-1.59189	0
														At5g39520	15840681	15842720	Complement	MUL8.22	expressed protein	6.35075	1.14074	-0.454965	-7.9898	6.95828	0.593664	0
														At4g17090	9604978	9607350	Complement	FCAALL.5	beta-amylase (CT-BMY) /14-alpha-D-glucan maltohydrolase	6.35246	-1.69237	-4.89339	0.848874	3.15167	-6.43366	0
														At4g23180	12138148	12140932	sense	F21P8.70	receptor-like protein kinase 4putative (RLK4)	6.37199	0.918139	-3.80652	-2.57745	6.65352	-2.27129	0
														At1g05560	1645497	1647146	Complement	T25N20.21	UDP-glucose transferase(UGT75B2)	6.38832	1.24846	-1.68496	-5.69383	7.23092	-0.355597	0
														At3g47180	17383785	17384438	Complement	F13I12.230	zinc finger (C3HC4-type RINGfinger) family protein	6.41778	0.949788	-2.94857	-3.60099	6.67254	-1.6265	0
														At5g55450	22484716	22485489	sense	MTE17.16	protease inhibitor/seedstorage/lipid transfer protein (LTP) family protein	6.42722	-3.16037	-2.99876	0.829427	1.76833	-6.52337	0
														At3g13780	4525079	4526221	sense	MMM17.21	expressed protein	6.74677	-4.05883	-3.55325	1.91101	1.20485	-10.5071	0
														At3g22340	7897491	7898405	sense	MCB17.7	copia-like retrotransposon familyhas a 4.2e-60 P-value blast match to GB:AAC02666polyprotein (Ty1_Copia-element) [Arabidopsis thaliana]	6.8574	1.06565	-1.02665	-7.04492	7.24392	0.0395709	0
														At4g00700	286051	289514	sense	F6N23.8	C2 domain-containing protein	6.93036	2.4292	-3.01864	-6.05066	10.797	-0.437515	0
														At1g09240	2984883	2986132	sense	T12M4.5	nicotianamine synthase putative	7.55272	1.28123	-2.42183	-5.34095	8.69763	-0.914393	0
														At1g05680	1703091	1704688	Complement	F3F20.13	UDP-glucoronosyl/UDP-glucosyltransferase family protein	9.33284	-3.25215	-5.00557	1.09685	2.9989	-9.62095	0

## Sheet: PET
Genes down-regulated in PETals (all: 83, highest absolute D stat: 10)														Genes up-regulated in PETals (all: 272, highest absolute D stat: 110)
gene	bpstart	bpend	strand	synonym	annotation	SEP	PET	STA	CAR	SEP+PET	PET+STA	d stat test		gene	bpstart	bpend	strand	synonym	annotation	SEP	PET	STA	CAR	SEP+PET	PET+STA	d stat test
At2g03980	1259196	1262549	sense	F3C11.9	GDSL-motif lipase/hydrolasefamily protein	0.297732	-7.74089	3.81286	2.06883	-5.64771	-2.03565	7.74089		At1g35290	12947522	12948819	Complement	T9I1.6	thioesterase family protein	-1.99238	9.56973	-2.52075	-1.98582	4.1723	3.63124	9.56973
At1g71880	27057842	27060001	sense	F17M19.3	sucrose transporter /sucrose-proton symporter (SUC1)	3.17712	-4.32243	1.82368	-0.904869	-0.776253	-1.84766	4.32243		At1g13070	4455475	4457097	sense	F3F19.9	pseudogene putative cytochromeP450 monooxygenasestrong similarity to gb|D78605 cytochrome P450monooxygenase from Arabidopsis thaliana and is a member ofthe PF|00067 Cytochrome P450 family	-1.84728	9.41916	-1.30475	-3.20211	4.10052	4.77671	9.41916
At4g15440	8835494	8838675	sense	FCAALL.125	hydroperoxide lyase (HPL1)	0.694879	-4.13687	0.166834	3.11165	-2.7707	-3.3315	4.13687		At1g20180	6996345	6997770	sense	T20H2.5	hypothetical protein	-1.61197	9.13067	-0.220831	-5.31673	4.61418	6.59857	9.13067
At5g59480	23996649	23998793	Complement	F2O15.10	haloacid dehalogenase-likehydrolase family protein	0.563862	-3.87155	1.1691	1.68676	-2.56724	-1.96667	3.87155		At1g54790	20444372	20447696	Complement	T22H22.20	GDSL-motif lipase/hydrolasefamily protein	-0.681153	8.97635	-2.63538	-2.80133	5.37803	3.0613	8.97635
At3g16120	5464775	5465537	sense	MSL1.16	dynein light chain putative	1.018	-3.81057	-0.414003	3.10429	-2.17902	-3.71169	3.81057		At4g38950	18154466	18158455	Complement	F19H22.50	kinesin motor family protein	-3.06953	8.85464	-2.27708	-0.976954	2.88115	3.62187	8.85464
At2g02810	801529	803435	sense	T20F6.5	UDP-galactose/UDP-glucosetransporter	2.74183	-3.71402	0.982734	-0.175524	-0.696058	-2.17441	3.71402		At5g01740	280719	281442	sense	T20L15.10	expressed protein	-1.33713	8.71117	-0.925286	-4.3651	4.70154	5.25338	8.71117
At1g48600	17969539	17973005	sense	T1N15.23	phosphoethanolamineN-methyltransferase 2 putative (NMT2)	3.05894	-3.62985	2.76164	-2.24616	-0.418104	-0.634974	3.62985		At5g09520	2958293	2958857	Complement	F17I14.290	hydroxyproline-richglycoprotein family protein	-2.45193	8.51293	-1.38419	-2.2654	3.26295	4.41799	8.51293
At5g06720	2077430	2079006	Complement	MPH15.8	peroxidase putative	0.541626	-3.18528	2.07224	0.394476	-2.14499	-0.809199	3.18528		At4g18550	10225017	10226873	Complement	F28J12.210	lipase class 3 family protein	-0.820561	8.48785	-1.83593	-3.7849	5.28381	4.06155	8.48785
At4g04610	2325001	2327011	sense	F4H6.13	5'-adenylylsulfate reductase(APR1) / PAPS reductase homolog (PRH19)	0.988076	-3.07952	2.26975	-0.26208	-1.70354	-0.628441	3.07952		At1g53830	20102193	20104557	sense	T18A20.6	pectinesterase family protein	-1.87077	8.24815	-1.71928	-2.67091	3.98837	4.16506	8.24815
At5g02490	550033	552643	Complement	T22P11.80	heat shock cognate 70 kDaprotein 2 (HSC70-2) (HSP70-2)	2.16529	-3.03793	0.781799	-0.00788146	-0.66801	-1.85202	3.03793		At4g04460	2224549	2227872	sense	T26N6.7	aspartyl protease family protein	0.713433	7.86344	-2.00954	-5.40644	7.49861	3.59563	7.86344
At4g15210	8666338	8669470	Complement	FCAALL.97	beta-amylase (BMY1) /14-alpha-D-glucan maltohydrolase	4.32496	-5.66381	-1.87921	2.91389	-0.77618	-7.78627	0		At1g60590	22317835	22320635	Complement	F8A5.12	polygalacturonase putative /pectinase putative	-4.19434	7.82484	-3.35034	1.15673	1.75773	2.37214	7.82484
At3g11440	3602100	3605110	sense	F24K9.11	myb family transcription factor(MYB65)	7.25214	-5.50132	-1.40933	0.524132	0.759503	-6.61274	0		At1g12090	4089845	4090723	Complement	F12F1.3	protease inhibitor/seedstorage/lipid transfer protein (LTP) family protein	-5.0599	7.80093	-2.01343	0.603791	1.19029	3.50714	7.80093
At5g19440	6556422	6558344	sense	F7K24.190	cinnamyl-alcohol dehydrogenaseputative (CAD)	5.41369	-5.2734	-4.03246	3.99514	0.0530031	-13.2334	0		At5g53810	21867405	21870237	Complement	MGN6.20	O-methyltransferase putative	-2.01712	7.77831	-1.32921	-2.44934	3.39958	4.16196	7.77831
At2g43530	18077163	18077710	sense	T1O24.27	trypsin inhibitor putative	-0.561598	-4.80844	-0.66484	7.15905	-4.71228	-4.86181	0		At1g23205	8233986	8234882	Complement	T26J12.3	invertase/pectin methylesteraseinhibitor family protein	-2.92309	7.50694	-2.9016	-0.169356	2.63778	2.66342	7.50694
At1g72260	27202095	27203106	Complement	T9N14.13	thionin (THI2.1)	-3.83015	-4.34329	0.349048	12.4652	-9.46751	-3.30299	0		At2g46710	19199005	19201919	sense	T3A4.9	rac GTPase activating proteinputative	-3.35682	7.3655	-0.536691	-2.0325	2.22073	5.11031	7.3655
At5g64080	25662489	25663954	Complement	MHJ24.6	protease inhibitor/seedstorage/lipid transfer protein (LTP) family protein	-2.05092	-4.33976	1.13357	5.87141	-6.42811	-2.4971	0		At5g63450	25426121	25427799	Complement	MLE2.8	cytochrome P450 putative	-1.65153	7.32172	0.150748	-4.64297	3.65023	6.05703	7.32172
At5g54060	21954128	21955534	Complement	MJP23.2	glycosyltransferase familyprotein	0.900069	-4.29893	-1.31266	5.10679	-2.60197	-5.46095	0		At1g29050	10136217	10139194	Complement	F28N24.24	expressed protein	0.316591	7.11682	-1.85644	-4.52708	6.18432	3.3989	7.11682
At2g26440	11254461	11256562	sense	T9J22.11	pectinesterase family protein	5.52831	-4.22114	-4.31888	3.28158	0.717105	-11.5555	0		At4g16620	9358139	9360082	Complement	FCAALL.421	integral membrane familyprotein / nodulin MtN21-related	-0.839019	7.08928	-1.0063	-3.76458	4.3075	4.11031	7.08928
At2g01610	274123	274819	Complement	F2I9.24	invertase/pectin methylesteraseinhibitor family protein	1.15178	-4.18876	-1.89667	5.40282	-2.37542	-6.01684	0		At4g28530	14090495	14094782	Complement	F20O9.220	no apical meristem (NAM) familyprotein	-2.30403	7.06855	-0.0555415	-3.42074	2.91924	5.57306	7.06855
At3g13780	4525079	4526221	sense	MMM17.21	expressed protein	6.74677	-4.05883	-3.55325	1.91101	1.20485	-10.5071	0		At2g46950	19296207	19298683	Complement	F14M4.22	cytochrome P450 family protein	-1.48411	6.92047	-1.23928	-2.93273	3.73154	4.01174	6.92047
At4g23670	12332570	12333814	Complement	F9D16.140	major latex protein-related /MLP-related	1.14052	-4.03488	-2.26513	5.83703	-2.24407	-6.49317	0		At5g61590	24781664	24782550	Complement	K11J9.4	AP2 domain-containingtranscription factor family protein	-2.81507	6.89798	-1.52267	-1.22534	2.41875	3.64327	6.89798
At3g22880	8097694	8100827	Complement	F5N5.6	meiotic recombination proteinputative	1.40325	-4.02979	7.9396	-3.8694	-2.03094	1.87833	0		At1g64400	23919261	23923446	Complement	F15H21.7	long-chain-fatty-acid--CoAligase putative / long-chain acyl-CoA synthetaseputative	-0.222166	6.79327	-4.91478	-0.775777	5.06762	0.858941	6.79327
At4g21990	11657020	11659069	Complement	F1N20.90	5'-adenylylsulfate reductase(APR3) / PAPS reductase homolog (PRH26)	2.06617	-4.00786	-0.576845	2.32697	-1.4339	-4.07095	0		At1g74670	28056960	28057810	sense	F1M20.35	gibberellin-responsive proteinputative	-0.68492	6.75607	-2.52967	-2.24352	4.48179	2.56293	6.75607
At4g18960	10382867	10388550	sense	F13C5.130	floral homeotic protein AGAMOUS(AG)	-3.879	-4.00777	6.06325	2.33126	-9.04896	1.15612	0		At3g60260	22284900	22288123	sense	F27H5.50	phagocytosis and cell motilityprotein ELMO1-related	-2.98009	6.54053	-1.318	-1.15295	2.16373	3.71642	6.54053
At4g24190	12551731	12555915	Complement	T22A6.20	shepherd protein (SHD) / clavataformation protein putative	2.76339	-3.96189	-3.61729	5.12329	-0.859541	-9.27234	0		At1g54820	20451032	20454528	sense	T22H22.21	protein kinase family protein	-2.5298	6.17445	-1.26522	-1.34438	2.29093	3.50155	6.17445
At1g44970	17004652	17006124	sense	F27F5.6	peroxidase putative	-1.63692	-3.95677	-2.1711	13.5313	-5.23065	-5.94646	0		At2g17470	7591587	7595090	Complement	F5J6.5	expressed protein	-1.22502	6.08091	-1.30097	-2.55495	3.4608	3.39259	6.08091
At3g62790	23234059	23235283	Complement	F26K9.220	NADH-ubiquinoneoxidoreductase-related	6.71108	-3.93884	-1.54614	-0.102587	1.42149	-5.22091	0		At1g18810	6485587	6487021	Complement	F6A14.9	phytochrome kinasesubstrate-related	-1.56796	6.01629	-1.17197	-2.23437	3.03546	3.45747	6.01629
At5g07990	2560395	2563110	sense	F13G24.190	flavonoid 3'-monooxygenase /flavonoid 3'-hydroxylase (F3'H) / cytochrome P450 75B1(CYP75B1) / transparent testa 7 protein (TT7)	0.426353	-3.93635	-0.366371	3.96009	-2.86819	-3.76353	0		At3g12680	4025086	4029147	Complement	MBK21.4	floral homeotic protein (HUA1)	-0.798557	5.86519	-2.13155	-2.01099	3.79357	2.46049	5.86519
At3g01500	194740	197981	Complement	F4P13.5	carbonic anhydrase 1 chloroplast/ carbonate dehydratase 1 (CA1)	4.8909	-3.93299	-6.39859	5.30889	0.590583	-16.3851	0		At5g43870	17649573	17653125	Complement	MQD19.1	expressed protein	-2.02824	5.8011	0.324284	-3.35697	2.47738	5.21499	5.8011
At2g38870	16243459	16244358	Complement	T7F6.4	protease inhibitor putative	4.07374	-3.89624	-3.39794	3.31175	0.0878183	-8.66837	0		At2g44740	18449064	18450471	Complement	F16B22.23	cyclin family protein	-3.46477	5.78816	0.181774	-1.77858	1.34286	5.00178	5.78816
At3g50740	18866142	18867865	Complement	T3A5.120	UDP-glucoronosyl/UDP-glucosyltransferase family protein	5.66856	-3.84513	0.924149	-2.23863	1.07184	-2.37107	0		At4g18570	10231229	10234704	sense	F28J12.230	proline-rich family protein	-1.75834	5.73225	-3.49692	0.199912	2.75872	1.3375	5.73225
At1g73600	27672813	27677233	sense	F6D5.1	phosphoethanolamineN-methyltransferase 3 putative (NMT3)	2.36827	-3.83431	-0.621018	1.8854	-1.03448	-3.98808	0		At4g34320	16422170	16423949	sense	F10M10.90	expressed protein	-1.35734	5.624	-1.18274	-2.24263	3.04675	3.23762	5.624
At4g35180	16738344	16740371	Complement	T12J5.50	amino acid transporter familyprotein	-0.502222	-3.78475	9.73376	-2.57826	-3.7594	2.66941	0		At2g32430	13778373	13781579	sense	T32F6.5	galactosyltransferase familyprotein	-0.988718	5.53218	0.227188	-4.40034	3.36512	4.86922	5.53218
At3g51620	19154631	19159221	sense	F26O13.260	expressed protein	0.855238	-3.76253	-0.791512	3.77622	-2.32056	-4.12126	0		At4g19380	10568376	10572423	Complement	T5K18.160	alcohol oxidase-related	-1.91369	5.53093	-0.84948	-1.95894	2.45395	3.53303	5.53093
At3g04630	1258637	1260874	sense	F7O18.11	expressed protein	-2.25948	-3.72698	6.72358	0.520372	-6.16922	1.46102	0		At5g26120	9121730	9125970	Complement	T1N24.13	glycosyl hydrolase familyprotein 51	-1.11724	5.52615	-1.27901	-2.13669	3.07493	2.91727	5.52615
At1g17745	6100957	6105258	sense	F11A6.8	D-3-phosphoglyceratedehydrogenase / 3-PGDH	2.66004	-3.69737	-0.987375	1.88708	-0.708259	-4.39755	0		At4g30670	14957371	14957968	Complement	T10C21.20	expressed protein	-1.09894	5.48134	-0.628288	-2.98176	3.14107	3.68341	5.48134
At5g55180	22406012	22407938	sense	MCO15.13	glycosyl hydrolase family 17protein	-0.0158381	-3.67975	-2.84166	9.45432	-3.14426	-6.86581	0		At2g31980	13616174	13616979	Complement	F22D22.27	cysteine proteinaseinhibitor-related	-4.38954	5.48055	-0.661208	-0.0756285	0.63589	3.76684	5.48055
At2g30490	13000740	13002847	Complement	T6B20.16	trans-cinnamate 4-monooxygenase/ cinnamic acid 4-hydroxylase (C4H) (CA4H) / cytochromeP450 73 (CYP73) (CYP73A5)	4.04489	-3.67206	-2.81006	2.56398	0.210126	-7.03719	0		At2g23620	10054459	10056371	Complement	F26B6.27	esterase putative	-0.665664	5.45453	-1.1276	-2.96109	3.67145	3.17909	5.45453
At3g14190	4710490	4711976	sense	MAG2.18	expressed protein	3.55501	-3.64506	-4.66899	4.87196	-0.0837894	-9.93423	0		At3g46200	16980251	16982189	sense	F12M12.170	MutT/nudix family protein	-2.51638	5.45079	0.534099	-2.89371	1.92439	5.24891	5.45079
At4g39950	18525240	18527573	sense	T5J17.120	cytochrome P450 79B2 putative(CYP79B2)	6.13268	-3.61026	-2.11706	0.460804	1.40335	-5.63298	0		At3g06780	2143494	2144527	sense	F3E22.8	glycine-rich protein	-2.56684	5.43409	-2.42761	0.32112	1.77284	1.89087	5.43409
At1g75040	28181364	28182601	sense	F9E10.11	pathogenesis-related protein 5(PR-5)	13.2569	-3.6081	-3.94662	-0.519522	3.88475	-7.99372	0		At1g78170	29418952	29419987	sense	T11I11.11	expressed protein	-3.62526	5.41671	-1.01176	-0.220905	1.06418	3.30025	5.41671
At5g50800	20682303	20684530	Complement	MFB16.8	nodulin MtN3 family protein	1.02336	-3.56702	10.4766	-5.13261	-2.06112	3.13347	0		At5g61600	24783612	24784656	Complement	K11J9.13	ethylene-responsiveelement-binding family protein	-0.191647	5.3075	-3.86927	-0.824304	4.16944	0.872501	5.3075
At2g22470	9545277	9545959	Complement	F14M13.13	arabinogalactan-protein (AGP2)	4.20181	-3.54831	1.8627	-2.38912	0.38568	-1.2817	0		At2g05910	2258297	2259378	Complement	T6P5.11	expressed protein	-1.91247	5.3007	-0.0924453	-2.62313	2.29137	4.25698	5.3007
At5g59310	23942311	23943078	Complement	MNC17.4	lipid transfer protein 4 (LTP4)	4.58124	-3.52385	-5.88423	4.70995	0.68779	-11.9945	0		At5g21100	7168186	7170930	sense	T10F18.130	L-ascorbate oxidase putative	-2.13491	5.21795	-0.993	-1.44296	2.1306	3.22205	5.21795
At3g61120	22629234	22631466	Complement	T20K12.20	MADS-box protein (AGL13)	-1.0682	-3.49958	2.23954	2.23831	-4.21847	-0.927305	0		At3g23020	8177222	8179750	Complement	MXC7.5	pentatricopeptide (PPR)repeat-containing protein	-5.13347	5.17504	-0.383923	0.337818	0.0428004	3.80902	5.17504
At1g74010	27835819	27837774	Complement	F2P9.12	strictosidine synthase familyprotein	1.66072	-3.47909	5.08076	-2.90798	-1.40213	0.948694	0		At1g11410	3841286	3844432	sense	T23J18.8	S-locus protein kinaseputative	-2.40891	5.11404	0.505931	-2.73301	1.8233	4.92771	5.11404
At5g17220	5658462	5659388	sense	MKP11.22	glutathione S-transferaseputative	1.62019	-3.46499	-2.21647	4.29913	-1.43567	-5.63416	0		At5g46330	18808963	18812773	sense	MPL12.13	leucine-rich repeattransmembrane protein kinase putative	-0.282796	5.11237	-1.86674	-2.39002	3.90393	2.29149	5.11237
At3g22550	7991653	7993461	Complement	F16J14.11	senescence-associatedprotein-related	10.4597	-3.45219	-2.49197	-0.551801	2.66513	-6.13479	0		At1g28100	9801069	9804413	sense	F13K9.27	expressed protein	-1.90971	5.10953	0.263055	-2.22932	1.58864	4.43448	5.10953
At5g05340	1578952	1580876	Complement	K18I23.14	peroxidase putative	5.73317	-3.44806	-0.0729639	-1.36061	1.21847	-3.02647	0		At5g37550	14936131	14937022	Complement	MPA22.10	expressed protein	0.14803	5.098	-1.46475	-3.2505	4.38744	2.55962	5.098
At5g24420	8336617	8337971	Complement	K16H17.13	glucosamine/galactosamine-6-phosphate isomerase-related	-2.02347	-3.43635	-2.50451	17.821	-5.20681	-5.84697	0		At3g15000	5050271	5052439	sense	K15M2.14	expressed protein	-0.422766	5.06876	-1.19152	-2.87652	3.66651	2.84567	5.06876
At2g16630	7216321	7218104	sense	T24I21.4	proline-rich family protein	-0.982741	-3.40825	-0.561199	6.05984	-4.01143	-3.52978	0		At5g07580	2399690	2400464	sense	T2I1.290	ethylene-responsiveelement-binding family protein	-1.81753	4.97753	-2.37515	-0.2395	2.25574	1.78304	4.97753
At5g59120	23881956	23885275	Complement	K18B18.11	subtilase family protein	-3.61735	-3.32831	2.37625	4.8957	-8.07594	-0.71541	0		At2g01420	180104	183327	Complement	F2I9.4	auxin transport protein putative	-3.04654	4.92435	0.0151643	-1.21471	1.01881	4.02335	4.92435
At2g46140	18966151	18967620	sense	T3F17.21	late embryogenesis abundantprotein putative / LEA protein putative	-2.20684	-3.30943	3.51917	2.07785	-5.43742	0.122667	0		At4g28780	14215551	14217585	sense	F16A16.110	GDSL-motif lipase/hydrolasefamily protein	-2.99766	4.89846	-2.17449	0.728601	1.21065	1.86299	4.89846
At1g56190	21032030	21034314	sense	F14G9.19	phosphoglycerate kinaseputative	2.1089	-3.29176	-0.7035	1.78184	-0.877146	-3.60247	0		At5g51190	20817810	20818642	Complement	MWD22.13	AP2 domain-containingtranscription factor putative	-2.35629	4.89148	-1.83186	-0.124742	1.68562	2.13766	4.89148
At3g62560	23148459	23150021	sense	T12C14.260	GTP-binding protein putative	3.16343	-3.28157	-2.44424	2.61408	-0.0995277	-6.00859	0		At5g62360	25057882	25058687	sense	MMI9.1	invertase/pectin methylesteraseinhibitor family protein	-3.1762	4.78466	-1.21793	-0.0510093	1.09491	2.76094	4.78466
At1g67810	25430151	25430968	sense	F12A21.6	Fe-S metabolism associateddomain-containing protein	2.39251	-3.27329	5.61184	-4.45819	-0.679776	1.4238	0		At1g80240	30176249	30177718	Complement	F18B13.30	expressed protein	-1.9486	4.77573	0.45295	-2.87502	1.97068	4.57958	4.77573
At5g61790	24844328	24846981	Complement	MAC9.15	calnexin 1 (CNX1)	2.63356	-3.26701	-3.3501	4.15907	-0.469657	-7.57775	0		At2g43050	17909563	17911520	sense	MFL8.9	pectinesterase family protein	-0.203836	4.74331	-0.418815	-3.96865	3.75165	3.52908	4.74331
At1g05680	1703091	1704688	Complement	F3F20.13	UDP-glucoronosyl/UDP-glucosyltransferase family protein	9.33284	-3.25215	-5.00557	1.09685	2.9989	-9.62095	0		At5g57760	23417951	23418480	sense	MRI1.12	expressed protein	-2.45949	4.73833	0.503526	-2.41182	1.56727	4.61231	4.73833
At1g73220	27541937	27544352	sense	T18K17.11	sugar transporter familyprotein	-1.63078	-3.24145	-0.238033	6.06639	-4.55155	-3.02884	0		At5g16190	5283576	5286479	Complement	T21H19.110	glycosyl transferase family 2protein	-2.42224	4.7342	-1.93324	0.121682	1.54796	1.9611	4.7342
At3g10970	3433078	3436284	Complement	F9F8.21	haloacid dehalogenase-likehydrolase family protein	-3.33445	-3.23988	2.32595	4.47671	-7.01113	-0.699303	0		At1g19770	6832341	6833693	sense	F6F9.18	purine permease-related	-1.76817	4.71829	-1.51549	-0.925344	2.1375	2.3754	4.71829
At1g78490	29533169	29535558	sense	T30F21.17	cytochrome P450 family protein	-3.76299	-3.2369	1.36648	6.60325	-7.61042	-1.49732	0		At1g01630	229057	230917	sense	T1N6.1	SEC14 cytosolic factor putative /phosphoglyceride transfer protein putative	-1.04513	4.69398	0.60414	-4.16648	2.8434	4.68142	4.69398
At1g71770	26994170	26997109	Complement	F14O23.15	polyadenylate-binding protein 5(PABP5)	-2.84414	-3.2126	8.5212	-0.0152236	-6.30336	2.44202	0		At2g14095	5939477	5940873	Complement	T22C12.14	expressed protein	-1.08624	4.63916	-1.28206	-1.73432	2.67754	2.49659	4.63916
At1g75900	28502723	28504799	sense	T4O12.13	family II extracellular lipase 3(EXL3)	-4.31495	-3.20789	1.55836	6.89909	-8.20839	-1.3234	0		At3g48490	17972274	17972890	sense	T29H11.260	expressed protein	0.574828	4.61687	-1.48335	-3.47687	4.5835	2.32832	4.61687
At1g43910	16658044	16660096	Complement	F9C16.7	AAA-type ATPase family protein	4.39391	-3.19512	-0.387523	-0.453987	0.722958	-3.15213	0		At1g01250	104491	105324	Complement	F6F3.6	AP2 domain-containingtranscription factor putative	-2.46395	4.58469	-1.36301	-0.30532	1.44265	2.40275	4.58469
At4g25100	12884167	12886770	Complement	F13M23.240	superoxide dismutase [Fe]chloroplast (SODB) / iron superoxide dismutase (FSD1)	13.9603	-3.17079	-2.82402	-0.680998	3.10893	-6.46292	0		At1g30360	10715647	10718979	sense	T4K22.4	early-responsive to dehydrationstress protein (ERD4)	-3.64784	4.5754	0.0837246	-0.797079	0.605032	3.95682	4.5754
At1g73480	27632600	27636467	sense	T9L24.33	hydrolase alpha/beta foldfamily protein	2.0652	-3.17066	5.33629	-3.87665	-0.844031	1.27295	0		At3g06070	1831063	1831929	Complement	F24F17.5	expressed protein	-1.12438	4.57362	0.0178764	-3.16898	2.63215	3.869	4.57362
At1g72290	27219451	27220453	sense	T9N14.19	trypsin and protease inhibitorfamily protein / Kunitz family protein	-3.20558	-3.16827	-1.87697	17.2473	-6.29584	-4.70328	0		At2g35710	15017905	15021226	Complement	T20F21.27	glycogenin glucosyltransferase(glycogenin)-related	-0.367778	4.51091	-0.97766	-3.03927	3.49162	2.9181	4.51091
At3g07350	2347474	2348797	sense	F21O3.6	expressed protein	2.69715	-3.16242	-3.7007	4.33306	-0.359013	-7.59057	0		At4g37080	17473266	17476946	sense	AP22.58	expressed protein	-1.6216	4.46614	-2.04129	-0.396319	2.11604	1.75569	4.46614
At5g55450	22484716	22485489	sense	MTE17.16	protease inhibitor/seedstorage/lipid transfer protein (LTP) family protein	6.42722	-3.16037	-2.99876	0.829427	1.76833	-6.52337	0		At1g78600	29572104	29573752	sense	T30F21.7	zinc finger (B-box type) familyprotein	-1.48656	4.39763	0.0458186	-2.58823	2.12344	3.74804	4.39763
At4g12960	7583269	7584627	sense	F25G13.50	gamma interferon responsivelysosomal thiol reductase family protein / GILT familyprotein	-2.54637	-3.15645	-2.39075	17.9259	-5.52193	-5.34224	0		At4g37470	17616653	17618452	Complement	F6G17.120	hydrolase alpha/beta foldfamily protein	-0.0173142	4.39365	-1.97579	-1.94961	3.63599	1.66671	4.39365
At5g44630	18020507	18022843	sense	K15C23.7	terpene synthase/cyclase familyprotein	-3.08602	-3.15467	-1.43481	13.0694	-6.14986	-4.20258	0		At2g39400	16459721	16461879	sense	F12L6.6	hydrolase alpha/beta fold familyprotein	-0.189215	4.35101	-1.6442	-2.11241	3.42299	1.96863	4.35101
At1g02310	458133	460696	Complement	T6A9.1	glycosyl hydrolase family protein5 / cellulase family protein / (1-4)-beta-mannanendohydrolase putative	2.72685	-3.08976	3.49095	-3.12224	-0.278457	0.249902	0		At5g23870	8045847	8050178	Complement	MRO11.9	pectinacetylesterase familyprotein	-2.66228	4.34332	-1.36324	0.204465	0.989634	2.05138	4.34332
At2g24850	10589909	10592295	Complement	F27C12.23	aminotransferase putative	5.91647	-3.07127	1.59236	-3.79188	1.61334	-1.14974	0		At1g55760	20850592	20852720	Complement	F20N2.15	BTB/POZ domain-containingprotein	0.492925	4.29802	-1.13391	-3.53156	4.20538	2.44656	4.29802
At1g09310	3009057	3009882	sense	T31J12.3	expressed protein	-1.93567	-3.06326	-3.25168	19.2605	-4.66598	-6.29173	0		At4g32810	15828232	15831481	sense	T16I18.20	dioxygenase-related	0.404603	4.28737	-1.033	-3.23156	4.10062	2.18931	4.28737
At3g28220	10525641	10527965	sense	T19D11.1	meprin and TRAF homologydomain-containing protein / MATH domain-containingprotein	7.89009	-3.06073	-3.12992	-0.0115796	2.67758	-6.1923	0		At1g33590	12177757	12179393	sense	T1E4.3	disease resistance protein-related/ LRR protein-related	-0.845091	4.28087	-2.31009	-0.78649	2.72558	1.41874	4.28087
At2g46450	19072789	19075437	sense	F11C10.14	cyclic nucleotide-regulated ionchannel putative (CNGC12)	3.47588	-3.0533	-0.195632	-0.116182	0.26793	-2.82806	0		At1g02205	418778	422438	sense	T7I23.10	CER1 protein	-4.22664	4.27514	-0.0847239	0.00768846	0.0666498	3.58831	4.27514
At1g37130	14160968	14164379	sense	F28L22.2	nitrate reductase 2 (NR2)	6.6796	-3.05317	-2.78095	0.271241	2.12022	-5.77815	0		At5g38610	15478075	15478674	Complement	MBB18.16	invertase/pectin methylesteraseinhibitor family protein	-1.3582	4.25902	-0.120448	-2.52974	2.25151	3.4888	4.25902
At1g70790	26704077	26706002	sense	F15H11.4	C2 domain-containing protein	-2.18426	-3.0463	10.0344	-1.41438	-5.01003	3.23505	0		At1g12610	4289954	4290994	Complement	T12C24.14	DRE-binding protein putative /CRT/DRE-binding factor putative	-2.20198	4.24793	-1.12137	-0.495904	1.40069	2.36214	4.24793
At5g51750	21037433	21040007	sense	MIO24.12	subtilase family protein	-2.93596	-3.03418	-1.89904	14.1877	-5.79483	-4.59302	0		At5g04770	1379081	1382420	sense	T1E3.130	amino acid permease familyprotein	-1.81744	4.24442	-1.14128	-0.884707	1.76605	2.38724	4.24442
At3g08740	2654647	2656242	Complement	F17O14.21	elongation factor P (EF-P)family protein	-4.13287	-3.0125	-0.793471	15.9723	-7.57172	-3.39367	0		At1g15260	5249755	5250568	sense	F9L1.20	expressed protein	-2.59203	4.21188	-3.34167	1.86149	1.14076	0.591371	4.21188
At4g39670	18410166	18410994	sense	F23K16.2	expressed protein	2.55267	-3.01003	5.25998	-4.69134	-0.364608	1.46564	0		At5g12030	3884108	3884738	Complement	F14F18.200	17.7 kDa class II heat shockprotein 17.6A (HSP17.7-CII)	-2.99369	4.20468	0.264404	-1.26867	0.845344	3.86902	4.20468
At3g02480	512321	513034	sense	F16B3.11	ABA-responsive protein-related	0.428975	-2.99973	6.87591	-2.81051	-2.13116	1.9491	0		At1g23070	8174000	8175747	Complement	T26J12.15	hypothetical protein	-0.644572	4.13514	-1.45702	-1.57693	2.72261	1.93831	4.13514
At5g13320	4268905	4271054	sense	T31B5.140	auxin-responsive GH3 familyprotein	6.90045	-2.9922	0.168648	-2.73639	2.14063	-2.40958	0		At4g18270	10099375	10101908	Complement	T9A21.120	glycosyl transferase family 4protein	-1.47839	4.11163	-0.143027	-2.14087	1.93812	3.29967	4.11163
														At2g36050	15142651	15143828	Complement	F11F19.32	ovate protein-related	-2.4431	4.10112	-1.00907	-0.321557	1.14989	2.40128	4.10112
														At2g17840	7762687	7764934	Complement	T13L16.14	senescence/dehydration-associated protein-related (ERD7)	-0.419816	4.08755	0.152934	-3.80469	2.98891	3.63341	4.08755
														At3g13720	4495026	4495963	Complement	MMM17.14	prenylated rab acceptor (PRA1)family protein	-1.55863	4.06923	-0.25077	-1.96875	1.89388	3.17995	4.06923
														At1g23080	8180566	8183559	Complement	T26J12.14	auxin efflux carrier proteinputative	-1.96172	4.05486	0.104979	-1.88586	1.50275	3.54383	4.05486
														At3g17100	5831259	5832425	sense	K14A17.17	expressed protein	-1.79037	4.0479	-1.37823	-0.553359	1.67755	2.04856	4.0479
														At5g46690	18962842	18964864	sense	MZA15.10	basic helix-loop-helix (bHLH)family protein	-2.55567	4.03564	-2.06	0.850993	1.00724	1.3996	4.03564
														At3g47560	17536162	17538008	Complement	F1P2.110	esterase/lipase/thioesterasefamily protein	-2.95284	3.99603	-0.60174	-0.240613	0.72569	2.7564	3.99603
														At3g23410	8382818	8386155	sense	MLM24.14	alcohol oxidase-related	-2.21475	3.9884	0.360381	-1.87185	1.25602	3.7978	3.9884
														At1g17190	5875343	5876525	sense	F20D23.11	glutathione S-transferaseputative	-2.58495	3.96313	0.250949	-1.3979	0.964912	3.6453	3.96313
														At5g04470	1266692	1267417	Complement	T32M21.70	expressed protein	-3.37011	3.95458	0.387629	-0.8778	0.408323	3.80541	3.95458
														At5g28770	10796463	10798211	Complement	T32B20.4	bZIP transcription factor familyprotein	-2.08939	3.90269	-0.451976	-0.964645	1.22003	2.7513	3.90269
														At3g54900	20352566	20353371	Complement	F28P10.120	CAX-interacting protein 1(CAXIP1)	-2.08846	3.90032	-1.06336	-0.44532	1.30604	2.2122	3.90032
														At5g06870	2133919	2135162	sense	MOJ9.4	polygalacturonase inhibitingprotein 2 (PGIP2)	-2.92153	3.88763	-0.0675944	-0.728571	0.67902	3.23273	3.88763
														At4g19160	10477317	10480150	sense	T18B16.130	expressed protein	-1.21394	3.84753	-0.163859	-2.1877	1.99087	3.06899	3.84753
														At3g01490	190879	193544	Complement	F4P13.4	protein kinase putative	-1.20941	3.81847	-0.109462	-2.21502	1.96825	3.10033	3.81847
														At5g14470	4662807	4664650	Complement	F18O22.260	GHMP kinase-related	-0.614557	3.78486	-1.05375	-1.78401	2.52319	2.09881	3.78486
														At3g14320	4777738	4778352	Complement	MLN21.11	zinc finger (C3HC4-type RINGfinger) family protein	-0.841427	3.778	-1.19394	-1.4473	2.32562	2.00221	3.778
														At4g00150	57199	59286	Complement	F6N15.20	scarecrow-like transcriptionfactor 6 (SCL6)	0.0564875	3.76565	-0.916513	-2.77726	3.25839	2.28284	3.76565
														At5g66080	26440645	26442632	Complement	K2A18.16	protein phosphatase 2C familyprotein / PP2C family protein	-1.58684	3.7415	-0.214919	-1.68809	1.62304	2.95027	3.7415
														At1g69890	26326774	26328267	Complement	T17F3.8	expressed protein	-0.772855	3.69164	-1.18382	-1.48689	2.35115	1.97338	3.69164
														At1g76090	28555303	28556675	Complement	T23E18.40	S-adenosyl-methionine-sterol-C-methyltransferase	-2.14875	3.6885	-2.15531	0.813333	1.11707	1.11511	3.6885
														At1g69500	26127652	26129720	sense	F10D13.15	cytochrome P450 family protein	-1.13522	3.66955	-0.537814	-1.71109	1.94243	2.53492	3.66955
														At1g22740	8049089	8050697	sense	T22J18.9	Ras-related protein (RAB7) /AtRab75 / small GTP-binding protein putative	-2.07025	3.64613	0.331706	-1.68213	1.12322	3.47516	3.64613
														At3g03770	945149	949045	Complement	F20H23.20	leucine-rich repeattransmembrane protein kinase putative	-0.89707	3.62996	-2.27217	-0.163618	2.09115	0.918577	3.62996
														At3g06810	2146398	2150837	sense	F3E22.5	acyl-CoA dehydrogenase-related	-1.31768	3.61211	-0.128286	-1.99678	1.81181	2.95593	3.61211
														At1g74310	27939597	27943851	Complement	F1O17.2	heat shock protein 101 (HSP101)	-2.64162	3.59784	-1.24482	0.429228	0.700951	1.85966	3.59784
														At3g27120	10000931	10003372	Complement	MOJ10.20	spastin ATPase putative	-0.952539	3.58203	-0.862208	-1.4212	2.00171	2.09944	3.58203
														At5g13220	4218920	4220817	sense	T31B5.40	expressed protein	-0.952401	3.58008	2.1106	-5.44164	2.08944	5.81598	0
														At3g43230	15218355	15220813	sense	F7K15.80	zinc finger (FYVE type) familyprotein	-0.0189862	3.58376	0.751007	-4.67178	3.03519	3.87975	0
														At5g45340	18385886	18388218	Complement	K9E15.12	cytochrome P450 family protein	-3.64366	3.58494	0.0511873	-0.0337499	-0.0154501	3.11828	0
														At4g15630	8917428	8918850	sense	FCAALL.230	integral membrane familyprotein	2.5532	3.59568	-3.19816	-2.98022	6.3425	0.289991	0
														At1g25230	8840394	8842300	Complement	F4F7.38	purple acid phosphatase familyprotein	-4.93945	3.59721	4.45494	-3.25978	-0.760505	11.271	0
														At3g14010	4636373	4640977	sense	MDC16.14	hydroxyproline-rich glycoproteinfamily protein	2.25328	3.59877	0.251972	-8.50628	5.85068	3.34494	0
														At3g12550	3978676	3981379	sense	T2E22.14	XH/XS domain-containing protein/ XS zinc finger domain-containing protein	-0.228076	3.61091	0.289553	-3.78357	2.82393	3.39546	0
														At3g47470	17504357	17506018	Complement	F1P2.20	chlorophyll A-B binding protein4 chloroplast / LHCI type III CAB-4 (CAB4)	-1.62492	3.61471	3.6217	-6.43477	1.55854	7.92479	0
														At1g64370	23892583	23893324	sense	F15H21.1	expressed protein	1.87636	3.62414	1.88689	-13.1011	5.24618	5.2758	0
														At1g15410	5298939	5300898	sense	T16N11.17	aspartate-glutamate racemasefamily	-3.1363	3.63146	0.778279	-1.22466	0.360548	3.9897	0
														At1g80440	30246499	30247956	sense	F5I6.25	kelch repeat-containing F-boxfamily protein	0.574226	3.64111	-0.161582	-4.30618	3.72546	2.94626	0
														At1g44170	16798399	16802761	Complement	T7O23.15	aldehyde dehydrogenase putative(ALDH)	-3.20444	3.66474	1.60779	-2.03378	0.310232	5.33254	0
														At4g22770	11963639	11965695	Complement	T12H17.160	DNA-binding family protein	-2.03368	3.6699	0.745549	-2.21926	1.18619	4.00322	0
														At2g38465	16113341	16113978	Complement	T19C21.3	expressed protein	1.08013	3.66991	-0.450447	-4.65818	4.35573	2.6673	0
														At1g51440	19074585	19076362	sense	F5D21.19	lipase class 3 family protein	-0.554766	3.67087	1.52695	-5.08168	2.58037	4.86007	0
														At3g29010	11008477	11009214	sense	K5K13.4	expressed protein	1.36029	3.67533	-0.0023275	-5.73929	4.6495	3.1439	0
														At5g58570	23689929	23690513	Complement	MQJ2.19	expressed protein	2.28305	3.68092	-0.496081	-6.65608	5.99774	2.63388	0
														At4g18425	10181345	10182151	Complement	F28J12.6	expressed protein	-4.5151	3.68328	4.92283	-4.13169	-0.521263	10.7328	0
														At1g11190	3750066	3752780	Complement	T28P6.14	bifunctional nuclease (BFN1)	-2.12792	3.69196	2.7109	-4.52247	1.13845	6.98743	0
														At5g49760	20233598	20238525	sense	K2I5.13	leucine-rich repeat familyprotein / protein kinase family protein	0.132471	3.69283	0.0297481	-3.99939	3.28514	3.18988	0
														At4g36410	17201930	17202988	sense	AP22.89	ubiquitin-conjugating enzyme 17(UBC17)	0.647447	3.69297	0.273161	-5.28403	3.87384	3.44702	0
														At5g37740	15009295	15010901	sense	K12B20.22	C2 domain-containing protein	-0.308875	3.70281	1.69585	-6.16046	2.81859	5.30202	0
														At5g64330	25744563	25748328	sense	MSJ1.17	non-phototropic hypocotyl 3(NPH3)	-4.99607	3.71436	4.67838	-3.52519	-0.763584	10.9548	0
														At2g46640	19156247	19158065	sense	F13A10.22	hypothetical protein	-2.65827	3.72863	2.34907	-3.46257	0.775104	6.24129	0
														At1g06460	1966834	1969535	Complement	F12K11.19	31.2 kDa small heat shockfamily protein / hsp20 family protein	2.19126	3.74314	-0.569452	-6.52166	5.99807	2.60822	0
														At4g19430	10598456	10599155	Complement	T5K18.210	expressed protein	1.20525	3.74561	0.0081905	-5.59719	4.53681	3.20718	0
														At2g21940	9357632	9360235	sense	F7D8.26	shikimate kinase putative	-2.8166	3.74588	2.61425	-3.60262	0.632948	7.30146	0
														At2g31945	13588658	13589203	sense	F20M17.2	expressed protein	0.248027	3.75875	2.00071	-7.47316	3.46319	5.53245	0
														At5g66590	26591407	26592098	sense	K1F13.27	allergen V5/Tpx-1-related familyprotein	-7.58486	3.79007	1.92203	0.28649	-1.91162	5.53459	0
														At3g43320	15286449	15287981	Complement	T5C2.20	hypothetical protein	-2.24393	3.79067	1.69151	-3.21904	1.13445	5.33103	0
														At1g03090	739687	744184	sense	F10O3.9	methylcrotonyl-CoA carboxylasealpha chain mitochondrial / 3-methylcrotonyl-CoAcarboxylase 1 (MCCA)	-1.35806	3.80537	0.880152	-3.2739	1.87943	4.26824	0
														At3g01750	270236	272873	sense	F28J7.8	ankyrin repeat family protein	-3.50638	3.80783	2.01619	-2.33763	0.227709	5.73862	0
														At5g05440	1609251	1610447	sense	K18I23.25	expressed protein	-1.88844	3.80944	1.52563	-3.44951	1.44363	5.09299	0
														At1g22400	7903649	7906662	Complement	F12K8.26	UDP-glucoronosyl/UDP-glucosyltransferase family protein	3.92668	3.81616	-1.97069	-6.68487	9.58589	1.36776	0
														At5g60860	24501855	24502931	sense	MAE1.9	Ras-related GTP-binding proteinputative	-1.84748	3.81972	1.93425	-4.05077	1.45135	5.90454	0
														At4g14010	8092832	8093377	Complement	FCAALL.140	rapid alkalinization factor(RALF) family protein	-1.64913	3.83201	0.787642	-2.84015	1.62532	4.20226	0
														At2g39850	16637704	16641331	sense	T5I7.15	subtilase family protein	-1.37193	3.84982	0.931736	-3.35583	1.85324	4.43884	0
														At1g56010	20950236	20952906	Complement	T6H22.19	transcription activator NAC1(NAC1)	-1.48588	3.85093	1.6146	-4.11776	1.81667	5.26819	0
														At4g18980	10398929	10399523	sense	F13C5.150	expressed protein	0.155465	3.85371	1.54982	-6.75695	3.43616	5.12891	0
														At2g42530	17716114	17717023	Complement	F14N22.20	cold-responsive protein /cold-regulated protein (cor15b)	-0.0212049	3.85423	-4.40069	0.39374	3.25247	-0.318286	0
														At1g15520	5331988	5338170	Complement	T16N11.3	ABC transporter family protein	2.70817	3.85789	-2.4492	-4.25036	6.8128	1.0374	0
														At2g44500	18381368	18383866	sense	F4I1.31	expressed protein	-0.0951618	3.86001	1.30314	-5.9943	3.16513	4.88629	0
														At4g38690	18074469	18075759	Complement	F20M13.250	1-phosphatidylinositolphosphodiesterase-related	-2.30137	3.87271	2.69185	-4.48862	1.14378	7.22261	0
														At1g59640	21912842	21914866	Complement	T30E16.21	basic helix-loop-helix (bHLH)family protein	-1.85803	3.87774	2.6003	-5.02816	1.4301	7.46418	0
														At2g41540	17333175	17336900	sense	T32G6.6	NAD-dependentglycerol-3-phosphate dehydrogenase family protein	-7.74395	3.87902	2.54077	-0.361826	-1.83873	6.64481	0
														At3g47120	17362126	17363807	Complement	F13I12.170	RNA recognition motif(RRM)-containing protein	-1.53715	3.8805	1.16465	-3.47025	1.73307	4.77641	0
														At1g10360	3395560	3396851	Complement	F14N23.24	glutathione S-transferaseputative	-1.52435	3.8872	1.48242	-3.92228	1.81719	5.09283	0
														At5g37540	14930065	14931661	sense	MPA22.8	aspartyl protease family protein	0.574636	3.89174	-0.188998	-4.52166	3.93917	3.1226	0
														At4g22200	11746525	11750710	Complement	T10I14.30	potassium channel protein 2(AKT2) (AKT3)	-0.807667	3.90108	2.01999	-5.9445	2.47172	5.98728	0
														At1g62710	23227540	23230581	Complement	F23N19.7	vacuolar processing enzyme beta/ beta-VPE	-1.43048	3.90732	2.58864	-5.59077	1.93209	6.6316	0
														At3g20790	7268768	7271517	sense	MOE17.10	oxidoreductase family protein	-7.98139	3.91124	3.24534	-0.963926	-1.83572	8.19674	0
														At2g42540	17718115	17719399	Complement	F14N22.19	cold-responsive protein /cold-regulated protein (cor15a)	1.15463	3.93339	-1.45097	-3.63819	4.62567	1.96093	0
														At3g58080	21521283	21521539	Complement	T10K17.290	hypothetical protein	-3.99705	3.94398	2.01189	-2.03366	-0.00597314	6.17892	0
														At5g45940	18646279	18647884	Complement	K15I22.14	MutT/nudix family protein	-3.26333	3.94551	1.42861	-2.00913	0.453484	5.15772	0
														At3g44980	16452008	16453083	sense	F14D17.50	hypothetical protein	1.34922	3.94745	1.33367	-9.46025	4.91361	4.91197	0
														At2g37640	15794783	15796931	Complement	F13M22.14	expansin putative (EXP3)	-5.43713	3.97021	0.52473	0.426755	-0.820361	3.96599	0
														At5g40450	16202027	16212756	Complement	MPO12.160	expressed protein	-0.251916	3.97705	2.28355	-7.61776	3.10165	6.32952	0
														At2g26530	11289853	11291307	Complement	T9J22.20	expressed protein	0.830081	3.98773	-1.26528	-3.43121	4.42743	1.99535	0
														At5g02420	523387	524074	sense	T1E22.7	expressed protein	-0.935114	3.99097	1.67522	-5.17657	2.43641	5.47469	0
														At5g05690	1702689	1706781	Complement	MJJ3.9	cytochrome P450 90A1 (CYP90A1)(CYP90) (CPD)	-2.33421	3.99628	0.835127	-2.27996	1.15591	4.42295	0
														At5g44610	18010792	18011895	Complement	K15C23.5	DREPP plasma membranepolypeptide-related	-2.3661	4.04237	0.912966	-2.39935	1.19471	4.52256	0
														At3g55830	20726080	20729017	sense	F27K19.10	glycosyltransferase familyprotein 47	-4.96092	4.06202	5.13753	-4.28453	-0.527577	12.9956	0
														At1g48100	17770543	17774255	sense	F21D18.18	glycoside hydrolase family 28protein / polygalacturonase (pectinase) family protein	-4.40732	4.06614	-1.00088	1.22524	-0.175245	2.39792	0
														At1g69530	26145499	26147163	sense	F10D13.18	expansin putative (EXP1)	-5.26909	4.06962	2.5976	-1.84445	-0.594783	7.72393	0
														At2g17880	7774047	7775013	Complement	T13L16.10	DNAJ heat shock proteinputative	-2.95002	4.09173	3.04514	-4.27722	0.833308	7.41014	0
														At4g22920	12016536	12018503	Complement	F7H19.100	expressed protein	1.90422	4.10368	0.57456	-8.89474	5.78497	4.13163	0
														At2g17710	7700678	7701828	sense	T17A5.17	expressed protein	-1.86706	4.10705	2.32661	-4.81784	1.67636	6.58174	0
														At3g52470	19461627	19462590	sense	F22O6.150	harpin-induced family protein /HIN1 family protein / harpin-responsive family protein	-6.41423	4.11844	1.54637	-0.196777	-1.15756	5.43964	0
														At3g10310	3190213	3195010	sense	F14P13.9	kinesin motor protein-related	-3.22994	4.11946	5.03779	-6.31228	0.641728	11.8341	0
														At4g20260	10940746	10943512	sense	F1C12.180	DREPP plasma membranepolypeptide family protein	1.18045	4.11953	2.03807	-11.1456	4.83205	5.95695	0
														At5g20110	6791489	6793348	Complement	F28I16.260	dynein light chain putative	-1.4857	4.13807	0.651373	-3.10757	1.95914	4.29175	0
														At1g33240	12051451	12054526	Complement	T9L6.10	trihelix DNA-binding proteinputative	-3.25407	4.13991	1.99477	-2.82886	0.602427	6.29676	0
														At5g25460	8863393	8865680	sense	F18G18.200	expressed protein	-12.8716	4.18147	2.95717	0.690019	-3.19822	7.38792	0
														At2g45580	18789400	18791417	Complement	F17K2.11	cytochrome P450 family protein	-5.65662	4.18403	4.57292	-3.34401	-0.830785	11.2411	0
														At5g13140	4170563	4171797	Complement	T19L5.100	expressed protein	-7.85561	4.23431	1.49881	0.312246	-1.56889	5.52297	0
														At1g23010	8147253	8149801	sense	F19G10.5	multi-copper oxidase type Ifamily protein	-2.59201	4.24495	2.59596	-4.36267	1.17406	7.35508	0
														At4g39480	18362482	18366782	sense	F23K16.110	cytochrome P450 familyprotein	-3.7854	4.27351	1.66359	-2.10404	0.334258	5.75601	0
														At3g01980	327462	329029	Complement	F1C9.24	short-chaindehydrogenase/reductase (SDR) family protein	-6.47524	4.27644	4.16824	-2.58743	-1.12756	11.0144	0
														At1g02340	465718	467844	Complement	T6A9.4	long hypocotyl in far-red 1 (HFR1)/ reduced phytochrome signaling (REP1) / basichelix-loop-helix FBI1 protein (FBI1) / reduced sensitivityto far-red light (RSF1) / bHLH protein 26 (BHLH026)(BHLH26)	-3.08588	4.28726	1.91538	-3.024	0.815278	6.25249	0
														At4g19420	10587177	10590560	Complement	T5K18.200	pectinacetylesterase familyprotein	1.10434	4.29425	0.742178	-8.54318	5.02255	4.53784	0
														At1g08510	2691083	2694380	Complement	T27G7.19	acyl-[acyl carrier protein]thioesterase / acyl-ACP thioesterase /oleoyl-[acyl-carrier protein] hydrolase / S-acyl fattyacid synthase thioesterase	-1.90059	4.31276	1.19024	-3.47483	1.73301	5.21322	0
														At2g29340	12604194	12606280	sense	F16P2.28	short-chaindehydrogenase/reductase (SDR) family protein	-1.98354	4.31374	1.69124	-3.98914	1.60133	6.18241	0
														At4g35110	16712467	16714958	Complement	M4E13.160	expressed protein	-1.18219	4.35827	2.80212	-7.10908	2.47102	7.71263	0
														At1g70270	26468063	26468523	sense	F17O7.20	expressed protein	-4.408	4.38294	-0.655646	0.650808	0.0113534	3.01775	0
														At2g45180	18633413	18633951	sense	T14P1.36	protease inhibitor/seedstorage/lipid transfer protein (LTP) family protein	-2.3978	4.38317	1.00073	-2.77766	1.42177	4.92152	0
														At3g52840	19592132	19597277	sense	F8J2.10	beta-galactosidase putative /lactase putative	-5.30454	4.3965	-0.585869	1.15244	-0.471324	3.06571	0
														At2g06850	2763555	2765717	sense	T9F8.4	xyloglucan:xyloglucosyltransferase / xyloglucan endotransglycosylase /endo-xyloglucan transferase (EXT) (EXGT-A1)	-6.60831	4.40277	3.61199	-2.10897	-1.15541	9.27479	0
														At1g33600	12180756	12182305	sense	T1E4.2	leucine-rich repeat familyprotein	1.10577	4.42505	-3.64297	-1.7135	5.18293	0.486431	0
														At5g49360	20029105	20033968	Complement	K21P3.26	glycosyl hydrolase family 3protein	0.282856	4.42913	1.5971	-8.19743	4.05647	5.79756	0
														At1g35190	12890415	12892852	sense	T32G9.27	oxidoreductase 2OG-Fe(II)oxygenase family protein	-2.91697	4.4315	4.04439	-6.00317	1.01902	11.7549	0
														At3g54300	20119187	20121624	Complement	F24B22.260	synaptobrevin family protein	-2.86529	4.44922	3.03082	-4.75098	0.985365	10.3099	0
														At1g52830	19676164	19677312	Complement	F14G24.10	auxin-responsive protein /indoleacetic acid-induced protein 6 (IAA6)	-4.04855	4.4615	3.75133	-4.23202	0.272651	10.8496	0
														At3g23800	8581661	8583842	sense	MYM9.16	selenium-binding family protein	-0.935911	4.46974	1.18031	-4.9477	2.76497	5.27779	0
														At5g52310	21258075	21260839	sense	K24M7.4	low-temperature-responsiveprotein 78 (LTI78) / desiccation-responsive protein 29A(RD29A)	1.60316	4.47851	-2.32412	-3.66723	5.7947	1.56709	0
														At1g55260	20618418	20620034	sense	F7A10.16	protease inhibitor/seedstorage/lipid transfer protein (LTP) family protein	-3.75606	4.47976	1.67671	-2.30053	0.473328	6.06249	0
														At2g38110	15959685	15962572	Complement	F16M14.4	phospholipid/glycerolacyltransferase family protein	-1.16369	4.49133	0.720251	-3.98759	2.58199	4.66225	0
														At1g02070	370257	370967	Complement	T7I23.30	expressed protein	-4.53297	4.51015	1.52831	-1.56172	0.011714	5.81506	0
														At4g36540	17243586	17245299	sense	AP22.3	basic helix-loop-helix (bHLH)family protein	-5.61128	4.5279	1.36875	-0.731301	-0.547285	5.61848	0
														At1g26820	9292433	9293771	Complement	T2P11.1	ribonuclease 3 (RNS3)	-2.60717	4.54605	0.843913	-2.39428	1.23853	4.95815	0
														At2g37130	15605000	15607137	Complement	T2N18.11	peroxidase 21 (PER21) (P21)(PRXR5)	-1.44502	4.61647	2.35558	-6.17514	2.37312	7.38175	0
														At1g76240	28607707	28608822	Complement	T23E18.17	expressed protein	-1.77885	4.64252	3.26752	-6.99923	2.15586	8.76705	0
														At1g32170	11575301	11577907	sense	F3C3.5	xyloglucan:xyloglucosyltransferase putative / xyloglucan endotransglycosylaseputative / endo-xyloglucan transferase putative (XTR4)	-1.28477	4.64873	2.86063	-7.40469	2.5924	8.18119	0
														At5g11420	3644599	3647296	sense	F2I11.1	expressed protein	-8.54372	4.68241	3.36198	-1.22365	-1.71657	9.22061	0
														At3g09500	2916986	2918036	sense	F11F8.7	60S ribosomal protein L35(RPL35A)	-2.12098	4.68905	0.598424	-2.82186	1.79755	4.70293	0
														At1g47960	17684826	17687298	Complement	T2J15.13	invertase/pectin methylesteraseinhibitor family protein	-1.00265	4.69901	0.836061	-4.55368	2.88169	4.98931	0
														At4g01950	844409	846787	Complement	T7B11.21	phospholipid/glycerolacyltransferase family protein	0.93323	4.70232	-2.47158	-2.85223	5.16004	1.52629	0
														At4g32460	15662272	15664983	Complement	F8B4.160	expressed protein	-8.20748	4.71915	3.19809	-1.30784	-1.50839	9.24018	0
														At5g01520	206431	208610	sense	F7A7.40	zinc finger (C3HC4-type RINGfinger) family protein	-0.0366776	4.72684	1.71543	-8.48724	3.89923	6.42605	0
														At4g03510	1557118	1559426	Complement	F9H3.14	zinc finger (C3HC4-type RINGfinger) family protein (RMA1)	-3.37264	4.75684	1.51203	-2.64407	0.857112	6.27919	0
														At1g61680	22776120	22778352	Complement	T13M11.3	terpene synthase/cyclase familyprotein	-2.97802	4.75731	4.05114	-6.32	1.1736	12.5881	0
														At5g52250	21234081	21235444	sense	F17P19.15	transducin family protein /WD-40 repeat family protein	-2.27138	4.7763	1.13638	-3.36437	1.71161	5.58219	0
														At5g45950	18651361	18653926	sense	K15I22.15	GDSL-motif lipase/hydrolasefamily protein	-4.92079	4.78073	3.15065	-3.09995	-0.0588214	9.26907	0
														At1g22380	7900511	7902321	Complement	T16E15.1	UDP-glucoronosyl/UDP-glucosyltransferase family protein	-2.21576	4.82641	3.46402	-6.87863	1.83745	10.3469	0
														At1g69120	25985999	25989919	Complement	F4N2.9	floral homeotic protein APETALA1(AP1) / agamous-like MADS box protein (AGL7)	2.34175	4.86478	-3.23009	-3.7716	8.75237	0.945643	0
														At2g47270	19418630	19419221	Complement	T8I13.11	expressed protein	-2.73214	4.87384	3.77812	-6.40075	1.51254	10.2598	0
														At2g30600	13043953	13048761	sense	T6B20.5	BTB/POZ domain-containingprotein	-4.39279	4.89382	1.78117	-2.25149	0.350219	6.49704	0
														At5g47550	19303676	19304221	Complement	MNJ7.14	cysteine protease inhibitorputative / cystatin putative	-3.66317	4.90626	1.02359	-2.00329	0.792644	5.45633	0
														At5g20240	6829123	6831456	sense	F5O24.130	floral homeotic proteinPISTILLATA (PI)	-3.36103	4.91071	4.49187	-6.45205	1.02406	13.1576	0
														At5g48900	19842363	19846318	sense	K24G6.1	pectate lyase family protein	-5.91349	4.93941	4.5831	-3.83166	-0.523341	12.7957	0
														At3g56010	20799670	20800903	sense	F27K19.190	expressed protein	-2.7406	4.95686	0.657941	-2.45042	1.46014	5.00941	0
														At5g24860	8541781	8542452	sense	T4C12.8	expressed protein	-0.679495	4.97933	1.54429	-6.48112	3.44474	6.19564	0
														At5g20250	6833684	6836786	sense	F5O24.140	raffinose synthase familyprotein / seed imbibition protein putative (din10)	-2.63532	5.03566	1.48383	-3.64083	1.62959	6.3085	0
														At5g25110	8657629	8659325	Complement	T11H3.120	CBL-interacting protein kinase25 (CIPK25)	-2.98933	5.04245	1.63387	-3.45729	1.38707	6.47212	0
														At1g20190	6998480	6999742	Complement	T20H2.4	expansin putative (EXP11)	-3.17996	5.06531	1.52998	-3.14449	1.24957	6.3261	0
														At4g15620	8913840	8915658	sense	FCAALL.348	integral membrane familyprotein	2.11502	5.0819	0.23406	-10.5253	7.19696	4.55235	0
														At3g29810	11730596	11732718	sense	K17E7.12	phytochelatin synthetase familyprotein / COBRA cell expansion protein COBL2	0.25993	5.09376	0.18166	-6.07275	4.55702	4.47418	0
														At1g63180	23431076	23433238	Complement	F16M19.8	UDP-glucose 4-epimeraseputative / UDP-galactose 4-epimerase putative /Galactowaldenase putative	-1.84443	5.1113	1.75119	-5.08721	2.26705	7.0796	0
														At3g10470	3260356	3261849	sense	F13M14.25	zinc finger (C2H2 type) familyprotein	-0.640752	5.12147	1.20771	-6.24421	3.54403	5.93679	0
														At2g10940	4317494	4319185	Complement	F15K19.1	protease inhibitor/seedstorage/lipid transfer protein (LTP) family protein	-8.61856	5.1353	1.64907	0.0713512	-1.48361	6.55793	0
														At2g40610	16955941	16957635	Complement	T2P4.4	expansin putative (EXP8)	-7.10701	5.13567	4.78943	-3.37274	-0.978112	14.457	0
														At1g23130	8200372	8201223	sense	T26J12.10	Bet v I allergen familyprotein	3.92306	5.16248	-3.06268	-6.48852	13.284	1.34697	0
														At3g10710	3352294	3354242	sense	T7M13.21	pectinesterase family protein	-1.09904	5.24107	0.753559	-4.7684	3.03861	5.41096	0
														At4g33420	16084835	16086291	sense	F17M5.180	peroxidase putative	-0.580745	5.26174	0.816526	-5.81694	3.67316	5.50312	0
														At4g32870	15862147	15862745	sense	T16I18.80	expressed protein	2.5327	5.29204	-1.12318	-8.11945	8.44733	3.19129	0
														At4g10310	6391980	6395803	sense	F24G24.110	sodium transporter (HKT1)	1.74604	5.30578	-0.149432	-8.79968	6.9105	4.26475	0
														At1g14280	4877622	4879144	sense	F14L17.4	phytochrome kinase putative	-4.70065	5.33825	2.63026	-3.19186	0.391986	8.73433	0
														At5g17700	5830617	5833903	Complement	MVA3.5	MATE efflux family protein	-4.65616	5.34469	1.17847	-1.6325	0.362046	6.2516	0
														At2g30520	13009819	13012672	Complement	T6B20.13	signal transducer of phototropicresponse (RPT2)	-2.29706	5.36226	2.00834	-5.12865	2.33232	7.00583	0
														At5g18600	6183265	6183956	Complement	T28N17.80	glutaredoxin family protein	1.37243	5.43564	0.13955	-8.87884	6.44866	4.70495	0
														At1g66120	24616284	24618468	sense	F15E12.22	acyl-activating enzyme 11(AAE11)	-1.3721	5.48676	2.10416	-6.86926	3.05744	7.80063	0
														At2g28085	11975197	11975697	Complement	F24D13.1	auxin-responsive family protein	1.52	5.50015	-0.703424	-7.13513	6.75552	3.76064	0
														At2g24210	10301410	10304481	sense	F27D4.12	myrcene/ocimene synthase(TPS10)	-4.02926	5.51013	4.82201	-6.60269	0.928549	16.1694	0
														At3g06980	2201473	2204839	sense	F17A9.13	DEAD/DEAH box helicaseputative	-6.02458	5.52895	2.53636	-2.28847	-0.213009	9.18171	0
														At3g44200	15917427	15922475	sense	F26G5.150	protein kinase family protein	-3.12301	5.53456	1.67877	-3.74332	1.55174	7.11463	0
														At4g18280	10104007	10104735	sense	T9A21.130	glycine-rich cell wallprotein-related	2.47743	5.54029	-3.54156	-4.26465	8.8732	1.23737	0
														At4g23400	12220753	12222380	sense	F16G20.100	major intrinsic family protein/ MIP family protein	-2.58082	5.64057	2.60347	-5.79964	2.07064	9.11011	0
														At1g23060	8170744	8172981	Complement	T26J12.16	expressed protein	-1.87746	5.69508	1.59989	-5.38667	2.69754	7.15167	0
														At4g22730	11941395	11943750	sense	T12H17.120	leucine-rich repeattransmembrane protein kinase putative	-3.57277	5.92572	0.883441	-2.62808	1.40803	6.18901	0
														At1g71140	26828424	26830410	sense	F23N20.13	MATE efflux family protein	1.17491	5.95699	-1.97577	-4.71121	6.80493	2.60191	0
														At1g66540	24828122	24830249	sense	F28G11.4	cytochrome P450 putative	-1.29885	5.98272	1.31739	-6.15757	3.43182	6.9453	0
														At3g21510	7578181	7579603	Complement	MIL23.7	two-component phosphorelaymediator 3 (HP3)	-3.70219	6.2339	1.35685	-3.26414	1.47877	7.3273	0
														At5g56540	22910377	22910868	sense	MKN22.5	arabinogalactan-protein (AGP14)	-5.65364	6.44946	2.94047	-3.54174	0.405254	12.181	0
														At3g53270	19761025	19764176	Complement	T4D2.1	expressed protein	-2.77153	6.69336	2.81994	-6.88656	2.26324	13.8655	0
														At2g45560	18783126	18785584	Complement	F17K2.9	cytochrome P450 family protein	-3.66964	6.74356	2.25362	-4.65923	1.61548	11.1514	0
														At5g04200	1153791	1155041	sense	F21E1.120	latex-abundant proteinputative (AMC9) / caspase family protein	-2.2969	6.98643	1.5644	-5.81614	2.9821	8.60136	0
														At4g00950	405673	407142	Complement	T18A10.4	expressed protein	-4.0384	7.02366	2.1181	-4.40484	1.64156	9.94962	0
														At2g39980	16695379	16697034	Complement	T28M21.14	transferase family protein	-2.20664	7.04294	1.33771	-5.59761	3.06338	8.13961	0
														At2g23760	10114789	10120210	Complement	F27L4.6	BEL1-like homeobox 4 protein(BLH4)	1.12943	7.11265	-3.17445	-3.7511	8.08778	1.98148	0
														At1g70720	26670070	26670866	sense	F5A18.10	invertase/pectin methylesteraseinhibitor family protein	-4.40268	7.47571	1.57214	-3.72228	1.65776	8.8833	0
														At2g17845	7765928	7766963	sense	T13L16.19	short-chaindehydrogenase/reductase (SDR) family protein	-3.60324	7.95766	1.27076	-4.32959	2.33182	8.862	0
														At4g37800	17775468	17777391	Complement	T28I19.80	xyloglucan:xyloglucosyltransferase putative / xyloglucan endotransglycosylaseputative / endo-xyloglucan transferase putative	-3.64748	8.46437	2.47222	-6.41255	2.55013	13.6461	0
														At4g19170	10481797	10483868	sense	T18B16.140	9-cis-epoxycarotenoiddioxygenase putative / neoxanthin cleavage enzymeputative / carotenoid cleavage dioxygenase putative	1.53285	8.48464	-2.397	-6.82611	9.94372	3.68127	0

## Sheet: STA
Genes down-regulated in STAmens (all: 160, highest absolute D stat: 23)														Genes up-regulated in STAmens (all:731, highest absolute D stat: 631)
gene	bpstart	bpend	strand	synonym	annotation	SEP	PET	STA	CAR	SEP+PET	PET+STA	d stat test		gene	bpstart	bpend	strand	synonym	annotation	SEP	PET	STA	CAR	SEP+PET	PET+STA	d stat test
At1g72610	27342776	27343706	Complement	F28P22.20	germin-like protein (GER1)	0.847817	1.87971	-8.10746	3.39874	2.41644	-3.74954	8.10746		At3g11400	3578394	3580535	sense	F24K9.7	eukaryotic translation initiationfactor 3G / eIF3g	-3.11632	-2.75637	18.0652	-2.53504	-5.65241	5.35526	18.0652
At1g20620	7143073	7146477	sense	F2D10.40	catalase 3 (SEN2)	1.50045	-0.555782	-4.9232	3.62899	0.794018	-4.80839	4.9232		At4g30140	14738393	14740682	Complement	F6G3.170	GDSL-motif lipase/hydrolasefamily protein	-2.48957	-2.45093	17.8646	-2.91221	-4.66877	5.16719	17.8646
At2g23120	9849123	9849714	sense	F21P24.18	expressed protein	1.94619	1.5835	-4.92213	0.717078	3.22322	-2.34289	4.92213		At2g46860	19260757	19262344	sense	F19D11.23	inorganic pyrophosphataseputative [soluble] / pyrophosphate phospho-hydrolaseputative / PPase putative	-2.22264	-2.2237	15.5823	-2.80527	-4.15908	4.77168	15.5823
At1g19960	6928074	6928268	sense	T20H2.25	expressed protein	0.674541	1.92063	-4.65409	1.41091	2.30495	-1.81849	4.65409		At4g25010	12854640	12856361	Complement	F13M23.150	nodulin MtN3 family protein	-2.25177	-2.50655	15.4549	-2.95715	-4.46156	4.92818	15.4549
At4g28400	14048360	14050341	sense	F20O9.80	protein phosphatase 2C putative/ PP2C putative	1.6589	0.863513	-4.53981	1.49466	2.23181	-2.82204	4.53981		At3g43810	15675358	15677445	Complement	T28A8.100	calmodulin-7 (CAM7)	-2.5595	-2.54165	15.1218	-2.45647	-4.84601	4.71535	15.1218
At2g42530	17716114	17717023	Complement	F14N22.20	cold-responsive protein /cold-regulated protein (cor15b)	-0.0212049	3.85423	-4.40069	0.39374	3.25247	-0.318286	4.40069		At5g38760	15541408	15542207	sense	MKD10.60	expressed protein	-2.41452	-2.07352	14.6646	-2.59763	-4.22333	4.80108	14.6646
At2g31070	13227555	13229686	Complement	T16B12.12	TCP family transcriptionfactor putative	3.36942	-0.519783	-4.19274	1.14053	2.30517	-4.14428	4.19274		At5g65530	26207823	26210192	Complement	K21L13.3	protein kinase putative	-2.28728	-2.62805	14.5834	-2.20486	-4.69185	4.18396	14.5834
At5g62470	25096217	25098314	Complement	K19B1.8	myb family transcription factor(MYB96)	-0.552882	0.910838	-4.12171	3.67841	0.313165	-2.49486	4.12171		At2g45800	18864795	18866192	Complement	F4I18.22	LIM domain-containing protein	-2.32736	-2.54454	14.3282	-2.61015	-4.58662	4.62451	14.3282
At1g20020	6942796	6945006	sense	T20H2.20	ferredoxin--NADP(+) reductaseputative / adrenodoxin reductase putative	1.7866	-0.290227	-3.98487	2.2125	1.26847	-3.68199	3.98487		At2g19000	8248186	8248866	sense	F19F24.5	expressed protein	-2.42604	-2.53025	14.3083	-2.74157	-4.64791	4.84416	14.3083
At2g30500	13005236	13007149	Complement	T6B20.15	kinase interacting familyprotein	0.284684	-0.0766666	-3.74266	3.52947	0.178717	-3.24592	3.74266		At1g29140	10179015	10180005	sense	F28N24.16	pollen Ole e 1 allergen andextensin family protein	-2.80996	-2.67004	14.2866	-2.23686	-5.23968	4.7075	14.2866
At1g06520	1993977	1996111	Complement	F12K11.15	phospholipid/glycerolacyltransferase family protein	-1.80913	3.06325	-3.72405	2.38264	0.980129	-0.423321	3.72405		At5g15110	4895969	4897685	sense	F2G14.230	pectate lyase family protein	-2.33613	-2.32389	13.7336	-2.74968	-4.35444	4.78961	13.7336
At1g08380	2640858	2641825	Complement	T27G7.25	expressed protein	0.250306	0.285218	-3.69133	3.04553	0.465284	-2.80872	3.69133		At3g02970	669110	670502	Complement	F13E7.8	phosphate-responsive 1 familyprotein	-2.55644	-2.56426	13.7057	-2.43902	-4.83809	4.66314	13.7057
At5g10290	3235296	3238720	Complement	F18D22.60	leucine-rich repeat familyprotein / protein kinase family protein	1.69405	-0.310298	-3.65656	1.96917	1.16259	-3.42987	3.65656		At3g20150	7031418	7036505	sense	MAL21.18	kinesin motor family protein	-2.45156	-2.47497	13.6001	-2.41382	-4.65495	4.55318	13.6001
At4g16442	9271887	9273111	Complement	FCAALL.228	integral membrane familyprotein	-0.925	1.27525	-3.64033	3.20657	0.303086	-1.75102	3.64033		At5g04180	1147674	1149280	Complement	F21E1.100	carbonic anhydrase familyprotein	-2.21471	-2.39329	13.5167	-1.95069	-4.43283	3.89689	13.5167
At2g46870	19267987	19269473	sense	F14M4.30	DNA-binding protein putative	1.11962	2.13142	-3.61524	0.0961262	2.93823	-1.05216	3.61524		At3g28760	10794192	10796541	Complement	T19N8.5	expressed protein	-2.14635	-2.36157	13.4932	-2.44522	-4.25109	4.31481	13.4932
At3g19090	6601472	6603715	sense	MHP21.1	RNA-binding protein putative	-0.206894	1.0268	-3.59814	2.61263	0.712451	-2.00094	3.59814		At4g00350	151919	154130	sense	F5I10.20	MATE efflux family protein	-2.05331	-2.33315	13.3325	-2.63091	-4.097	4.38489	13.3325
At1g62750	23237099	23240112	Complement	F23N19.11	elongation factor Tu familyprotein	2.50486	-0.406856	-3.59767	1.34397	1.7534	-3.49145	3.59767		At1g01980	340374	341999	Complement	F22M8.11	FAD-binding domain-containingprotein	-2.42895	-2.36332	13.2344	-2.59487	-4.49478	4.71961	13.2344
At3g26710	9814763	9815987	sense	MLJ15.10	expressed protein	1.7919	0.016783	-3.48569	1.47256	1.55181	-2.93342	3.48569		At1g04470	1211072	1214590	Complement	F19P19.7	expressed protein	-2.00852	-2.18189	13.1695	-2.64579	-3.91003	4.38472	13.1695
At1g76080	28552680	28554313	Complement	T23E18.2	thioredoxin family protein	3.24439	0.611211	-3.43936	-0.458552	3.38489	-2.32526	3.43936		At2g46210	18984417	18986074	sense	T3F17.14	delta-8 sphingolipid desaturaseputative	-2.58394	-2.44588	13.1157	-2.27745	-4.76804	4.54547	13.1157
At5g07240	2271920	2274288	sense	T28J14.180	calmodulin-binding familyprotein	2.29573	1.16349	-3.33679	-0.321341	3.1494	-1.66877	3.33679		At2g36020	15130233	15132667	Complement	F11F19.7	abscisic acid-responsive HVA22family protein	-2.08855	-2.39772	12.8664	-2.75293	-4.1713	4.51484	12.8664
At3g25040	9124313	9126301	sense	K3G3.1	ER lumen protein retainingreceptor putative / HDEL receptor putative	1.74336	0.996808	-3.24144	0.270324	2.45324	-1.74808	3.24144		At1g23350	8293584	8294232	Complement	F26F24.23	invertase/pectin methylesteraseinhibitor family protein	-2.42863	-2.65213	12.8334	-2.42762	-4.78408	4.50486	12.8334
At3g10020	3091048	3091771	Complement	T22K18.16	expressed protein	-0.367968	0.475118	-3.19678	3.10467	0.0963633	-2.22303	3.19678		At5g58050	23511511	23514807	Complement	K21L19.4	glycerophosphoryl diesterphosphodiesterase family protein	-2.5922	-2.67296	12.8234	-2.19579	-4.99987	4.43399	12.8234
At4g37910	17825074	17828171	Complement	F20D10.30	heat shock protein 70mitochondrial putative / HSP70 mitochondrial putative	1.42262	-0.0457298	-3.13386	1.61837	1.18195	-2.71408	3.13386		At3g05610	1625678	1628179	Complement	F18C1.12	pectinesterase family protein	-2.61931	-2.69494	12.6372	-2.13013	-5.05462	4.39049	12.6372
At4g23680	12336196	12337486	Complement	F9D16.150	major latex protein-related /MLP-related	4.58255	3.00361	-8.03316	-1.07809	8.3964	-2.71429	0		At5g16500	5386678	5389168	Complement	MQK4.24	protein kinase family protein	-2.24512	-2.1607	12.5957	-2.59766	-4.11179	4.56251	12.5957
At3g01500	194740	197981	Complement	F4P13.5	carbonic anhydrase 1 chloroplast/ carbonate dehydratase 1 (CA1)	4.8909	-3.93299	-6.39859	5.30889	0.590583	-16.3851	0		At3g09490	2915565	2916679	sense	F11F8.6	chloroplast lumen common familyprotein	-2.53966	-2.33719	12.5656	-2.57816	-4.55891	4.79232	12.5656
At5g59310	23942311	23943078	Complement	MNC17.4	lipid transfer protein 4 (LTP4)	4.58124	-3.52385	-5.88423	4.70995	0.68779	-11.9945	0		At4g39110	18222477	18225113	Complement	T22F8.10	protein kinase family protein	-2.52705	-2.45846	12.552	-2.39433	-4.68819	4.58348	12.552
At4g08950	5740294	5741521	sense	T3H13.3	phosphate-responsive proteinputative (EXO)	-0.774405	0.36291	-5.84345	6.72683	-0.350996	-4.32768	0		At4g27580	13765667	13766603	Complement	T29A15.70	expressed protein	-2.39875	-2.81889	12.4981	-2.10275	-4.96749	4.14851	12.4981
At1g05680	1703091	1704688	Complement	F3F20.13	UDP-glucoronosyl/UDP-glucosyltransferase family protein	9.33284	-3.25215	-5.00557	1.09685	2.9989	-9.62095	0		At3g17020	5802555	5804130	Complement	K14A17.9	universal stress protein (USP)family protein	-2.566	-2.50976	12.4667	-2.11948	-4.82438	4.35298	12.4667
At5g17990	5957215	5959906	sense	MCM23.6	anthranilatephosphoribosyltransferase	5.01441	-0.770026	-4.99036	0.774731	3.21457	-5.18157	0		At5g58170	23557487	23560318	Complement	MCK7.4	glycerophosphoryl diesterphosphodiesterase family protein	-2.71681	-2.54461	12.4441	-2.17383	-4.98886	4.53938	12.4441
At1g64400	23919261	23923446	Complement	F15H21.7	long-chain-fatty-acid--CoAligase putative / long-chain acyl-CoA synthetaseputative	-0.222166	6.79327	-4.91478	-0.775777	5.06762	0.858941	0		At1g66210	24669292	24672446	Complement	T6J19.3	subtilase family protein	-2.39466	-2.56664	12.4259	-2.21335	-4.69546	4.27275	12.4259
At4g17090	9604978	9607350	Complement	FCAALL.5	beta-amylase (CT-BMY) /14-alpha-D-glucan maltohydrolase	6.35246	-1.69237	-4.89339	0.848874	3.15167	-6.43366	0		At1g47270	17328996	17331168	sense	F8G22.1	F-box family protein / tubbyfamily protein	-2.01318	-2.90868	12.3528	-2.3218	-4.61672	3.96481	12.3528
At4g38970	18163490	18165734	Complement	F19H22.70	fructose-bisphosphate aldolaseputative	4.00889	-2.70586	-4.6746	3.32926	0.901291	-8.02567	0		At2g23900	10181613	10183706	sense	T29E15.10	glycoside hydrolase family 28protein / polygalacturonase (pectinase) family protein	-2.48253	-2.54495	12.3413	-2.41177	-4.72331	4.54484	12.3413
At3g14190	4710490	4711976	sense	MAG2.18	expressed protein	3.55501	-3.64506	-4.66899	4.87196	-0.0837894	-9.93423	0		At3g20550	7174470	7177943	Complement	K10D20.9	forkhead-associateddomain-containing protein / FHA domain-containing protein	-2.62921	-2.54311	12.2787	-2.19563	-4.8937	4.47343	12.2787
At1g65490	24358434	24358975	sense	F5I14.26	expressed protein	7.55679	-0.665045	-4.61897	-0.801626	4.83454	-4.68742	0		At3g04700	1276674	1277830	sense	F7O18.17	expressed protein	-2.19349	-2.36359	12.2567	-2.16366	-4.31704	4.06613	12.2567
At1g51805	19224646	19229358	Complement	F19C24.2	leucine-rich repeat proteinkinase putative	6.13531	0.221635	-4.60742	-1.03201	5.20746	-3.54398	0		At1g68610	25767286	25767768	sense	F24J5.15	hypothetical protein	-2.4827	-2.29753	12.2414	-2.5392	-4.46254	4.6947	12.2414
At5g04140	1129853	1138443	sense	F21E1.60	glutamate synthase (GLU1) /ferredoxin-dependent glutamate synthase (Fd-GOGAT 1)	5.4135	-0.982458	-4.59733	0.511413	3.23142	-5.13397	0		At2g05850	2242678	2244484	Complement	T6P5.5	serine carboxypeptidase S10 familyprotein	-2.72338	-2.53199	12.1989	-2.12337	-4.98385	4.49216	12.1989
At2g35370	14898181	14899297	sense	T32F12.25	glycine cleavage system Hprotein 1 mitochondrial (GDCSH) (GCDH)	2.65136	-1.20844	-4.57041	2.64882	1.08879	-5.89944	0		At3g20190	7044950	7047396	sense	MAL21.23	leucine-rich repeattransmembrane protein kinase putative	-2.25711	-2.27777	12.1955	-2.65554	-4.21931	4.59601	12.1955
At3g63110	23329051	23330515	Complement	T20O10.210	adenylateisopentenyltransferase 3 / cytokinin synthase (IPT3)	1.72939	-0.793115	-4.54055	3.33991	0.774811	-4.81329	0		At5g26640	9347844	9348177	Complement	F21E10.103	hypothetical protein	-2.81038	-2.6133	12.1726	-1.74988	-5.2316	4.2004	12.1726
At2g34810	14692335	14694141	sense	F19I3.4	FAD-binding domain-containingprotein	5.65359	-0.994816	-4.33158	0.142727	3.47985	-4.83286	0		At3g62150	23019730	23024554	Complement	T17J13.110	multidrug resistant (MDR) ABCtransporter putative	-2.27641	-2.26196	12.1095	-2.22327	-4.2883	4.21794	12.1095
At4g14690	8418278	8419258	sense	FCAALL.232	chlorophyll A-B binding familyprotein / early light-induced protein putative	9.49918	-0.0552865	-4.33057	-2.42103	6.91229	-3.69968	0		At3g05930	1770343	1771356	sense	F10A16.23	germin-like protein (GLP8)	-2.62666	-2.5691	12.1093	-1.97691	-4.95857	4.25808	12.1093
At2g26440	11254461	11256562	sense	T9J22.11	pectinesterase family protein	5.52831	-4.22114	-4.31888	3.28158	0.717105	-11.5555	0		At2g18180	7918136	7920777	Complement	F8D23.4	SEC14 cytosolic factor putative/ phosphoglyceride transfer protein putative	-1.78873	-2.22236	12.0907	-2.40158	-3.74992	3.91371	12.0907
At3g62380	23094584	23095827	Complement	T12C14.80	hypothetical protein	6.56116	-1.81756	-4.29547	0.41544	3.17389	-5.90811	0		At3g18990	6548875	6551847	Complement	K13E13.10	transcriptional factor B3family protein	-2.39311	-2.19356	12.0171	-2.79761	-4.24478	4.86576	12.0171
At5g20950	7107378	7111314	Complement	F22D1.120	glycosyl hydrolase family 3protein	1.78146	-2.7576	-4.26733	5.74139	-0.788446	-7.44092	0		At5g39400	15783265	15785472	sense	MUL8.8	pollen specific phosphataseputative / phosphatase and tensin putative (PTEN1)	-2.27171	-2.1477	12.0134	-2.70676	-4.09847	4.67295	12.0134
At1g55450	20708593	20710556	Complement	T5A14.14	embryo-abundant protein-related	4.77412	2.33881	-4.19903	-2.8295	7.62366	-1.29495	0		At3g62610	23165734	23167561	sense	F26K9.40	myb family transcription factor	-2.26325	-2.18238	11.9929	-2.70788	-4.12383	4.66074	11.9929
At1g32900	11920371	11923746	Complement	F9L11.8	starch synthase putative	4.36851	-2.3676	-4.06816	2.18303	1.35908	-6.74828	0		At1g14420	4931774	4933400	Complement	F14L17.19	pectate lyase family protein	-2.32337	-2.24302	11.9209	-2.56998	-4.25328	4.57817	11.9209
At5g51720	21026822	21027571	sense	MIO24.14	expressed protein	3.19885	-2.27257	-4.06444	3.09683	0.668119	-6.57213	0		At5g20390	6892833	6894197	Complement	F5O24.280	beta-13-glucanase putative	-2.352	-2.25662	11.8552	-2.70141	-4.27281	4.71902	11.8552
At5g48485	19663458	19664028	Complement	MJE7.10	protease inhibitor/seedstorage/lipid transfer protein (LTP) family protein	-0.874608	0.10016	-4.05376	5.29078	-0.666149	-3.30687	0		At3g19360	6707270	6709034	sense	MLD14.9	zinc finger (CCCH-type) familyprotein	-2.7323	-1.2831	11.8316	-3.37513	-3.61934	5.95834	11.8316
At3g50780	18886380	18888505	Complement	F18B3.60	expressed protein	2.64914	-1.88936	-4.03824	3.19944	0.564088	-6.08839	0		At5g50830	20700510	20702053	sense	K7B16.5	expressed protein	-2.32262	-2.4051	11.8091	-2.44617	-4.42222	4.43633	11.8091
At5g19440	6556422	6558344	sense	F7K24.190	cinnamyl-alcohol dehydrogenaseputative (CAD)	5.41369	-5.2734	-4.03246	3.99514	0.0530031	-13.2334	0		At3g17940	6143525	6145324	Complement	MEB5.16	aldose 1-epimerase familyprotein	-2.26068	-2.21952	11.7648	-2.46068	-4.18613	4.4215	11.7648
At5g41410	16597272	16601236	sense	MYC6.12	homeodomain protein (BEL1)	3.29195	3.01455	-4.00257	-2.44857	6.85889	-0.630295	0		At3g62680	23193698	23194970	sense	F26K9.110	proline-rich family protein	-2.60102	-2.59097	11.7486	-2.13517	-4.90738	4.37269	11.7486
At3g46750	17230929	17232446	sense	T6H20.220	hypothetical protein	-0.571205	-0.632573	-4.0022	6.12878	-1.05007	-4.10878	0		At5g61720	24818780	24820395	sense	K11J9.27	expressed protein	-2.42018	-2.31516	11.7165	-2.38844	-4.4338	4.48428	11.7165
At1g32060	11532530	11534619	sense	T12O21.4	phosphoribulokinase (PRK) /phosphopentokinase	2.55461	-1.94862	-3.99353	3.34638	0.449658	-6.05964	0		At4g36490	17222001	17225019	sense	AP22.26	SEC14 cytosolic factor putative/ phosphoglyceride transfer protein putative	-2.37103	-2.32926	11.7091	-2.45678	-4.39174	4.50094	11.7091
At5g59320	23946197	23946965	sense	MNC17.10	lipid transfer protein 3 (LTP3)	0.376444	-0.865274	-3.98547	4.80612	-0.425381	-4.39854	0		At5g28680	10719441	10722017	Complement	F4I4.60	protein kinase family protein	-2.32014	-2.21629	11.6935	-2.27221	-4.26101	4.29325	11.6935
At1g75040	28181364	28182601	sense	F9E10.11	pathogenesis-related protein 5(PR-5)	13.2569	-3.6081	-3.94662	-0.519522	3.88475	-7.99372	0		At2g26410	11241729	11243829	Complement	T9J22.8	calmodulin-binding familyprotein	-2.42989	-2.354	11.6457	-2.324	-4.4877	4.42476	11.6457
At5g67340	26881782	26884825	sense	K8K14.6	armadillo/beta-catenin repeatfamily protein / U-box domain-containing protein	3.4662	1.07213	-3.94388	-0.740457	4.16692	-2.19066	0		At3g60750	22464694	22468127	sense	T4C21.160	transketolase putative	-2.52149	-2.0754	11.6448	-2.43897	-4.27851	4.64822	11.6448
At1g21550	7553090	7553865	Complement	F24J8.15	calcium-binding proteinputative	4.64679	1.17466	-3.90317	-1.7651	5.34534	-2.14054	0		At2g07040	2916535	2918939	sense	T4E14.15	leucine-rich repeattransmembrane protein kinase putative	-2.34383	-2.21742	11.6277	-2.53732	-4.24563	4.56362	11.6277
At1g05710	1714949	1717269	sense	F3F20.16	ethylene-responsive proteinputative	2.58797	-0.752601	-3.88293	1.76541	1.4629	-4.23834	0		At2g33100	14043396	14047121	Complement	F25I18.16	cellulose synthase familyprotein	-2.22953	-2.07759	11.6236	-2.53832	-4.00582	4.4804	11.6236
At1g55850	20880365	20883146	sense	F14J16.9	cellulose synthase familyprotein	5.39601	-1.2613	-3.87055	0.253563	2.99499	-4.76429	0		At3g06490	2004150	2006630	sense	F5E6.18	myb family transcription factor(MYB108)	-2.10128	-1.9034	11.5881	-3.2527	-3.6497	5.02968	11.5881
At4g17245	9669377	9670017	sense	FCAALL.189	zinc finger (C3HC4-type RINGfinger) family protein	5.44764	-1.44772	-3.87002	0.524461	2.67355	-5.18057	0		At2g19770	8526720	8528274	Complement	F6F22.20	profilin 4 (PRO4) (PFN4)	-2.20072	-2.03574	11.5555	-2.29816	-3.96836	4.23245	11.5555
At5g61600	24783612	24784656	Complement	K11J9.13	ethylene-responsiveelement-binding family protein	-0.191647	5.3075	-3.86927	-0.824304	4.16944	0.872501	0		At3g43080	15083343	15086068	Complement	F7M19.90	Mutator-like transposase familyhas a 2.8e-60 P-value blast match to Q9S9L6 /322-461 PfamPF03108 MuDR family transposase (MuDr-element domain)	-2.35221	-2.14655	11.5399	-2.34301	-4.21169	4.40113	11.5399
At3g48550	18004984	18005677	sense	T8P19.60	expressed protein	-1.30121	1.23541	-3.84346	3.98777	-0.0432827	-1.94524	0		At5g07420	2349456	2351509	sense	T2I1.130	pectinesterase family protein	-2.21898	-2.35237	11.4684	-2.54286	-4.25208	4.42539	11.4684
At3g18800	6479694	6480384	sense	MVE11.18	expressed protein	4.67694	0.374568	-3.83855	-0.979606	4.33625	-2.84846	0		At3g26085	9532006	9533850	sense	MPE11.26	CAAX amino terminal proteasefamily protein	-2.38375	-2.63946	11.3917	-2.16995	-4.72623	4.18707	11.3917
At1g42970	16129874	16132283	sense	F13A11.3	glyceraldehyde-3-phosphatedehydrogenase B chloroplast (GAPB) / NADP-dependentglyceraldehydephosphate dehydrogenase subunit B	3.47018	-1.86848	-3.8324	2.21865	1.18348	-5.61577	0		At3g06260	1893810	1894865	Complement	F28L1.20	galactinol synthase putative	-2.32235	-2.24354	11.3471	-2.40285	-4.25918	4.40147	11.3471
At4g36040	17049174	17050277	Complement	T19K4.170	DNAJ heat shock N-terminaldomain-containing protein (J11)	5.1419	0.536799	-3.80789	-1.47962	4.93169	-2.66142	0		At4g24640	12717798	12719027	sense	F22K18.160	invertase/pectinmethylesterase inhibitor family protein	-2.41989	-2.37421	11.2867	-2.26579	-4.4959	4.34822	11.2867
At4g23180	12138148	12140932	sense	F21P8.70	receptor-like protein kinase 4putative (RLK4)	6.37199	0.918139	-3.80652	-2.57745	6.65352	-2.27129	0		At1g25240	8845218	8846480	sense	F4F7.37	epsin N-terminal homology (ENTH)domain-containing protein / clathrin assemblyprotein-related	-2.17672	-2.52863	11.28	-2.50711	-4.3724	4.31686	11.28
At4g39980	18539575	18542087	sense	T5J17.150	2-dehydro-3-deoxyphosphoheptonate aldolase 1 /3-deoxy-D-arabino-heptulosonate 7-phosphate synthase 1 /DAHP synthetase 1 (DHS1)	1.7475	-2.87831	-3.79303	5.4489	-0.902029	-7.21908	0		At4g11760	7079310	7080439	sense	T5C23.190	expressed protein	-2.18443	-2.41519	11.2798	-2.61147	-4.261	4.43464	11.2798
At1g44760	16899126	16901052	Complement	T12C22.3	universal stress protein (USP)family protein	0.531897	-1.08056	-3.74878	4.6875	-0.471764	-4.54022	0		At5g15140	4908689	4910673	sense	F8M21.30	aldose 1-epimerase familyprotein	-2.57961	-2.46389	11.25	-2.05036	-4.75955	4.27054	11.25
At2g28950	12438418	12440672	Complement	F8N16.24	expansin putative (EXP6)	-3.95812	0.721894	-3.74655	9.70309	-2.59821	-2.45043	0		At3g18200	6234312	6236097	Complement	MRC8.19	nodulin MtN21 family protein	-2.06562	-2.31158	11.2474	-2.25346	-4.09774	4.00309	11.2474
At3g26614	9786127	9788808	Complement	MFE16.16	non-LTR retrotransposon family(LINE)has a 3.0e-39 P-value blast match to GB:NP_038607 L1repeat Tf subfamily member 9 (LINE-element) [Musmusculus]	1.68911	-1.39114	-3.73622	3.44272	0.231251	-4.85804	0		At2g24450	10399871	10401003	Complement	T28I24.18	fasciclin-like arabinogalactanfamily protein	-2.68949	-2.40999	11.2335	-1.91825	-4.84313	4.25874	11.2335
At5g06530	1989748	1994913	Complement	F15M7.6	ABC transporter family protein	5.12433	0.624656	-3.70743	-1.5992	5.0572	-2.47685	0		At5g07430	2352460	2354203	sense	T2I1.140	pectinesterase family protein	-2.64998	-2.42376	11.2145	-2.05465	-4.78588	4.345	11.2145
At3g07350	2347474	2348797	sense	F21O3.6	expressed protein	2.69715	-3.16242	-3.7007	4.33306	-0.359013	-7.59057	0		At3g28750	10792828	10794081	Complement	T19N8.4	expressed protein	-2.2093	-2.34938	11.1935	-2.55646	-4.22596	4.41155	11.1935
At1g54040	20174383	20177617	Complement	F15I1.12	kelch repeat-containing protein	4.04837	-2.76434	-3.69454	2.52368	0.871188	-6.74866	0		At5g42170	16867114	16868935	sense	MJC20.28	family II extracellular lipaseputative	-2.21623	-2.28063	11.1764	-2.31795	-4.19842	4.20575	11.1764
At4g13850	8020948	8022217	sense	F18A5.240	glycine-rich RNA-bindingprotein (GRP2)	0.368103	-1.44715	-3.68819	5.60893	-0.927296	-4.99296	0		At1g03050	707726	709860	sense	F10O3.13	epsin N-terminal homology (ENTH)domain-containing protein / clathrin assemblyprotein-related	-2.37848	-2.09453	11.1581	-2.53158	-4.14929	4.59648	11.1581
At4g23600	12310629	12313222	sense	F9D16.70	coronatine-responsive tyrosineaminotransferase / tyrosine transaminase	12.4473	-2.76413	-3.67413	-0.683958	3.84807	-6.73576	0		At3g02810	608467	610992	Complement	F13E7.25	protein kinase family protein	-2.27319	-2.23174	11.1404	-2.61943	-4.16675	4.54685	11.1404
At1g78370	29489165	29490183	Complement	F3F9.23	glutathione S-transferaseputative	1.93158	-1.82759	-3.66779	3.61398	0.068711	-5.44259	0		At2g22180	9436049	9436924	sense	T26C19.16	hydroxyproline-richglycoprotein family protein	-2.09812	-2.07321	11.1274	-2.34772	-3.88402	4.14933	11.1274
At5g64120	25676532	25678228	Complement	MHJ24.10	peroxidase putative	6.67391	-0.392508	-3.65585	-1.23385	4.55993	-3.52778	0		At1g58120	21524066	21526122	sense	T18I24.4	expressed protein	-2.34405	-2.23353	11.1269	-2.19048	-4.29933	4.22365	11.1269
At1g33600	12180756	12182305	sense	T1E4.2	leucine-rich repeat familyprotein	1.10577	4.42505	-3.64297	-1.7135	5.18293	0.486431	0		At2g21540	9227636	9231576	Complement	F3K23.30	SEC14 cytosolic factor putative/ phosphoglyceride transfer protein putative	-3.27921	-2.63327	11.097	-0.920483	-5.93098	3.75979	11.097
At3g56680	21002259	21004646	sense	T8M16.10	expressed protein	4.4806	-0.816923	-3.63839	0.258486	2.78271	-4.03043	0		At5g27980	10015803	10016704	Complement	F15F15.50	seed maturation family protein	-2.0718	-1.92958	11.0793	-2.49348	-3.71171	4.29847	11.0793
At5g48540	19686190	19687146	Complement	MJE7.18	33 kDa secretory protein-related	4.95638	2.09811	-3.63809	-3.2349	7.205	-1.14034	0		At2g26490	11275020	11276701	sense	T9J22.16	transducin family protein /WD-40 repeat family protein	-2.04723	-2.30935	11.07	-2.5846	-4.02653	4.27781	11.07
At5g08380	2694678	2697688	Complement	F8L15.110	alpha-galactosidase putative /melibiase putative / alpha-D-galactosidegalactohydrolase putative	2.74161	-2.70561	-3.63066	3.66082	0.00964801	-7.20822	0		At3g20500	7157916	7160413	sense	K10D20.4	calcineurin-like phosphoesterasefamily protein	-2.21415	-2.14721	11.0008	-2.57099	-4.037	4.45988	11.0008
At4g33010	15926673	15931335	Complement	F26P21.130	glycine dehydrogenase[decarboxylating] putative / glycine decarboxylaseputative / glycine cleavage system P-protein putative	6.22957	-2.18435	-3.62372	0.596582	2.44524	-5.93347	0		At3g52570	19512108	19513977	sense	F22O6.50	expressed protein	-2.32858	-2.2005	10.9896	-2.46063	-4.20832	4.46046	10.9896
At4g30650	14954326	14954974	sense	F17I23.10	hydrophobic protein putative /low temperature and salt responsive protein putative	-0.824305	0.491989	-3.61832	4.11173	-0.280745	-2.56227	0		At2g31500	13420841	13423613	sense	T9H9.2	calcium-dependent protein kinaseputative / CDPK putative	-2.31083	-2.17441	10.9883	-2.5208	-4.1597	4.50415	10.9883
At4g24190	12551731	12555915	Complement	T22A6.20	shepherd protein (SHD) / clavataformation protein putative	2.76339	-3.96189	-3.61729	5.12329	-0.859541	-9.27234	0		At5g26060	9104854	9105527	Complement	T1N24.103	S1 self-incompatibilityprotein-related	-2.24356	-2.20213	10.928	-2.16901	-4.1688	4.10266	10.928
At3g56060	20814112	20816992	Complement	F27K19.3	glucose-methanol-choline (GMC)oxidoreductase family protein	1.292	-1.2962	-3.60513	3.67765	-0.0124301	-4.79463	0		At4g25780	13121077	13121964	sense	F14M19.60	pathogenesis-related proteinputative	-2.57472	-2.29757	10.8919	-2.10229	-4.58023	4.33612	10.8919
At1g11860	4001294	4003441	sense	F12F1.30	aminomethyltransferaseputative	1.13075	-2.86647	-3.6007	6.31826	-1.41166	-6.94123	0		At2g16730	7268912	7273249	Complement	T24I21.14	glycosyl hydrolase family 35protein	-2.45822	-2.21467	10.8727	-2.47199	-4.33351	4.58174	10.8727
At4g00490	222348	225457	sense	F6N23.1	beta-amylase putative /14-alpha-D-glucan maltohydrolase putative	2.15497	-1.23041	-3.59242	2.55703	0.730066	-4.57606	0		At1g55570	20761438	20763742	sense	T5A14.1	multi-copper oxidase type Ifamily protein	-2.35769	-2.64025	10.8546	-1.95398	-4.72566	3.95211	10.8546
At2g33450	14180655	14181609	sense	F4P9.22	50S ribosomal protein L28chloroplast (CL28)	-0.113036	-1.88464	-3.56861	6.99326	-1.73523	-5.28842	0		At1g79860	30046992	30049068	Complement	F19K16.18	expressed protein	-2.15698	-2.13822	10.8501	-2.48304	-3.97287	4.30324	10.8501
At5g51550	20956720	20958121	Complement	K17N15.10	phosphate-responsive 1 familyprotein	-2.70663	0.059703	-3.56818	8.07046	-2.25391	-2.97284	0		At2g26450	11258198	11260690	sense	T9J22.12	pectinesterase family protein	-2.54031	-2.42188	10.8055	-2.14648	-4.65064	4.32142	10.8055
At1g64770	24061102	24063224	sense	F13O11.8	expressed protein	3.45103	-2.20437	-3.56316	2.35875	0.907695	-5.71104	0		At3g42590	14707244	14707936	sense	T12K4.40	hypothetical protein	-2.58442	-2.31085	10.7923	-1.47294	-4.73983	3.73018	10.7923
At1g76100	28558881	28559651	Complement	T23E18.3	plastocyanin	-2.55989	-0.156264	-3.55796	8.56131	-2.33675	-3.1864	0		At4g35010	16667935	16672093	Complement	F11I11.3	glycosyl hydrolase family 35protein	-2.69843	-2.45988	10.7034	-1.65342	-4.9316	3.98759	10.7034
At3g13780	4525079	4526221	sense	MMM17.21	expressed protein	6.74677	-4.05883	-3.55325	1.91101	1.20485	-10.5071	0		At1g68110	25528381	25529813	sense	T23K23.4	epsin N-terminal homology (ENTH)domain-containing protein / clathrin assemblyprotein-related	-2.48111	-1.73245	10.639	-2.84841	-3.84803	5.02893	10.639
At4g29410	14468250	14470173	Complement	F17A13.230	60S ribosomal protein L28(RPL28C)	-0.523157	-2.1435	-3.54747	9.47076	-2.34872	-5.71673	0		At4g28280	14010791	14011493	sense	F26K10.160	expressed protein	-2.08114	-2.03821	10.6336	-2.45028	-3.80876	4.21361	10.6336
At4g18280	10104007	10104735	sense	T9A21.130	glycine-rich cell wallprotein-related	2.47743	5.54029	-3.54156	-4.26465	8.8732	1.23737	0		At3g28950	10977345	10978729	Complement	K5K13.15	avirulence-responsiveprotein-related / avirulence induced gene (AIG)protein-related	-2.48619	-2.28977	10.6314	-2.3554	-4.43769	4.48044	10.6314
At1g49750	18414597	18416469	Complement	F14J22.4	leucine-rich repeat familyprotein	1.69754	-1.31221	-3.53295	3.13179	0.303897	-4.55991	0		At4g04930	2509131	2511060	sense	T1J1.1	fatty acid desaturase familyprotein	-2.42284	-2.06821	10.6246	-2.54159	-4.14543	4.6251	10.6246
At3g13784	4528536	4530676	Complement	MMM17.25	beta-fructosidase putative /beta-fructofuranosidase putative / cell wall invertaseputative	1.35903	3.56908	-3.52554	-1.44605	4.63281	0.0541934	0		At1g76370	28653343	28655378	Complement	F15M4.13	protein kinase putative	-2.13239	-2.15151	10.6189	-2.3975	-3.97877	4.21421	10.6189
At5g54770	22263821	22265558	sense	K5F14.12	thiazole biosynthetic enzymechloroplast (ARA6) (THI1) (THI4)	2.12317	-1.3097	-3.49838	2.60664	0.641844	-4.55513	0		At3g28770	10797953	10804474	sense	T19N8.6	expressed protein	-2.5693	-2.32799	10.613	-2.13316	-4.58254	4.34066	10.613
At4g18570	10231229	10234704	sense	F28J12.230	proline-rich family protein	-1.75834	5.73225	-3.49692	0.199912	2.75872	1.3375	0		At3g62140	23018252	23019601	sense	T17J13.100	expressed protein	-2.32483	-2.5483	10.6047	-2.14299	-4.55949	4.09676	10.6047
At2g35760	15039002	15040384	sense	T20F21.5	integral membrane familyprotein	0.916231	-2.33927	-3.47454	5.75044	-1.17522	-6.07026	0		At2g18470	8012367	8014849	Complement	T30D6.2	protein kinase family protein	-2.09832	-2.19828	10.5985	-2.16523	-4.02537	3.96298	10.5985
At1g10760	3581035	3590044	Complement	F20B24.24	starch excess protein (SEX1)	3.7904	-1.45691	-3.45834	1.24415	1.69288	-4.76097	0		At3g25140	9154718	9156851	sense	MJL12.8	glycosyl transferase family 8protein	-2.20046	-2.16173	10.5967	-2.35546	-4.05765	4.2394	10.5967
At3g27240	10057026	10059953	Complement	K17E12.6	cytochrome c1 putative	0.725987	-2.03396	-3.45484	5.49246	-1.10732	-5.45541	0		At3g61200	22668430	22669365	Complement	T20K12.100	thioesterase family protein	-2.26463	-1.93467	10.5765	-2.249	-3.90848	4.22536	10.5765
At2g21330	9135232	9137293	Complement	F3K23.9	fructose-bisphosphate aldolaseputative	2.02443	-2.52291	-3.45124	4.15664	-0.390046	-6.50034	0		At5g20410	6896679	6898785	sense	F5O24.300	12-diacylglycerol3-beta-galactosyltransferase putative /monogalactosyldiacylglycerol synthase putative / MGDGsynthase putative	-1.81834	-2.3485	10.5712	-2.45429	-3.85569	3.93376	10.5712
At1g09340	3015388	3018236	sense	T31J12.6	expressed protein	1.98588	-2.06268	-3.43697	3.60012	-0.0750236	-5.46304	0		At2g26850	11456391	11458317	Complement	F12C20.11	F-box family protein	-2.03617	-2.38246	10.5638	-2.28816	-4.11748	3.98953	10.5638
At2g29670	12689221	12692164	Complement	T27A16.23	expressed protein	2.74048	1.90334	-3.40121	-1.38409	4.51827	-1.07104	0		At2g43230	17973384	17976133	sense	F14B2.17	serine/threonine protein kinaseputative	-2.43481	-1.69325	10.5537	-2.65936	-3.78533	4.81914	10.5537
At2g38870	16243459	16244358	Complement	T7F6.4	protease inhibitor putative	4.07374	-3.89624	-3.39794	3.31175	0.0878183	-8.66837	0		At2g13350	5543474	5544963	Complement	F15O11.1	C2 domain-containing protein	-2.30894	-2.28828	10.5414	-2.43336	-4.25828	4.38193	10.5414
At2g37540	15758653	15761045	Complement	F13M22.4	short-chaindehydrogenase/reductase (SDR) family protein	8.48254	-1.20625	-3.39193	-1.40133	4.43955	-4.24779	0		At2g33270	14110758	14112281	sense	F4P9.4	thioredoxin family protein	-2.21415	-2.03245	10.4853	-2.52341	-3.91451	4.40284	10.4853
At4g12600	7453199	7454478	sense	T1P17.190	ribosomal proteinL7Ae/L30e/S12e/Gadd45 family protein	0.00152983	-2.22157	-3.39071	6.82954	-1.91883	-5.43141	0		At5g50800	20682303	20684530	Complement	MFB16.8	nodulin MtN3 family protein	1.02336	-3.56702	10.4766	-5.13261	-2.06112	3.13347	10.4766
At1g77510	29131544	29134506	sense	T5M16.10	protein disulfide isomeraseputative	3.60822	-2.91203	-3.39031	2.77195	0.462875	-6.66951	0		At2g15880	6925121	6927401	Complement	F19G14.12	leucine-rich repeat familyprotein / extensin family protein	-1.92602	-1.98015	10.4583	-2.67177	-3.58965	4.28433	10.4583
At1g05450	1599955	1601624	sense	T25N20.10	protease inhibitor/seedstorage/lipid transfer protein (LTP)-related	-3.84335	3.02914	-3.39025	4.2674	-0.555154	-0.244513	0		At1g55560	20757989	20760320	Complement	T5A14.2	multi-copper oxidase type Ifamily protein	-2.52476	-2.51748	10.4388	-1.84892	-4.76993	4.0089	10.4388
At5g64040	25645814	25646730	Complement	MBM17.17	photosystem I reaction centersubunit PSI-N chloroplast putative / PSI-N putative(PSAN)	-0.302852	0.313665	-3.38034	3.42818	0.012647	-2.51488	0		At3g56550	20963875	20965620	Complement	T5P19.200	pentatricopeptide (PPR)repeat-containing protein	-1.88423	-2.28913	10.4363	-2.56111	-3.84527	4.0921	10.4363
At5g09660	2993446	2995676	Complement	F17I14.150	malate dehydrogenaseglyoxysomal	4.92309	-1.21122	-3.37759	0.149345	2.70232	-4.24937	0		At4g18395	10169455	10169941	sense	F28J12.4	expressed protein	-2.19999	-2.12805	10.4253	-2.57976	-3.98583	4.42939	10.4253
At3g54010	20011867	20016161	sense	F5K20.310	peptidyl-prolyl cis-transisomerase putative / FK506-binding protein putative /pasticcino 1-D (PAS1-D)	1.71691	-1.08459	-3.36738	2.67894	0.510911	-4.11048	0		At3g13360	4338366	4340403	Complement	MDC11.20	expressed protein	-2.45287	-2.5329	10.399	-1.89126	-4.70665	3.98062	10.399
At5g14320	4617653	4618900	Complement	F18O22.110	30S ribosomal protein S13chloroplast (CS13)	-0.520059	-0.999787	-3.35966	5.75153	-1.32977	-3.96014	0		At4g25590	13059146	13059638	Complement	M7J2.40	actin-depolymerizing factorputative	-2.04003	-2.27851	10.3449	-2.38598	-3.99977	4.08058	10.3449
At1g23310	8268405	8271888	Complement	F26F24.16	glutamate:glyoxylateaminotransferase 1 (GGT1)	3.78581	-0.776945	-3.35402	0.484668	2.32356	-3.73838	0		At3g20840	7300972	7303376	sense	MOE17.15	ovule development proteinputative	-2.41807	-2.5998	10.331	-1.90324	-4.72437	3.94482	10.331
At1g60590	22317835	22320635	Complement	F8A5.12	polygalacturonase putative /pectinase putative	-4.19434	7.82484	-3.35034	1.15673	1.75773	2.37214	0		At5g23270	7838937	7841024	sense	MKD15.13	sugar transporter putative	-2.20354	-2.11915	10.3281	-2.42774	-3.99866	4.29759	10.3281
At5g61790	24844328	24846981	Complement	MAC9.15	calnexin 1 (CNX1)	2.63356	-3.26701	-3.3501	4.15907	-0.469657	-7.57775	0		At1g10770	3591634	3592412	Complement	F20B24.19	invertase/pectin methylesteraseinhibitor family protein	-2.52533	-2.54914	10.3276	-1.83146	-4.79106	3.9795	10.3276
At1g15260	5249755	5250568	sense	F9L1.20	expressed protein	-2.59203	4.21188	-3.34167	1.86149	1.14076	0.591371	0		At1g35490	13061616	13063424	sense	F15O4.49	bZIP family transcriptionfactor	-2.28807	-2.10284	10.2879	-2.45201	-4.05829	4.40396	10.2879
At3g49650	18416245	18420387	Complement	T9C5.240	kinesin motor protein-related	0.128158	-0.848968	-3.33086	4.39865	-0.627827	-3.76391	0		At5g64790	25919939	25921785	sense	MXK3.1	glycosyl hydrolase family 17protein	-2.18723	-2.14878	10.2867	-2.49048	-3.99881	4.32605	10.2867
At5g38530	15441269	15443700	sense	MBB18.6	tryptophan synthase-related	4.87235	-2.84926	-3.32591	1.74321	1.19258	-6.99468	0		At5g13580	4370695	4373204	sense	T6I14.7	ABC transporter family protein	-2.43716	-2.58195	10.2829	-1.92372	-4.71964	3.98269	10.2829
At3g57230	21188689	21191911	sense	F28O9.80	MADS-box protein (AGL16)	14.1749	-1.84943	-3.31585	-3.0017	6.12231	-4.79736	0		At3g01270	82695	84904	Complement	T4P13.4	pectate lyase family protein	-2.71409	-2.63121	10.2755	-1.44374	-5.13013	3.76675	10.2755
At4g02410	1059889	1062153	Complement	T14P8.3	lectin protein kinase familyprotein	6.3517	0.150945	-3.31559	-2.18554	5.30422	-2.66875	0		At3g18780	6474877	6477210	sense	MVE11.16	actin 2 (ACT2)	-2.03018	-1.95182	10.2704	-2.32095	-3.68812	4.05214	10.2704
At1g18080	6222194	6224144	sense	T10O22.6	WD-40 repeat family protein /auxin-dependent protein (ARCA) / guaninenucleotide-binding protein beta subunit putative	-0.987461	-1.70225	-3.31179	8.63194	-2.39233	-4.77182	0		At1g47280	17334499	17336846	Complement	T3F24.20	expressed protein	-2.3021	-1.84189	10.2289	-1.97772	-3.88401	4.01027	10.2289
At3g58580	21671843	21674674	Complement	F14P22.170	endonuclease/exonuclease/phosphatase family protein	-0.62084	-1.57492	-3.30822	6.77246	-1.92917	-4.5505	0		At3g19280	6681303	6683898	Complement	MVI11.20	glycoprotein3-alpha-L-fucosyltransferase A / FucTA / corealpha-(13)-fucosyltransferase (FUT11)	-2.35174	-2.0709	10.1208	-2.44099	-4.07838	4.44308	10.1208
At3g29290	11239348	11241516	sense	MMF24.4	pentatricopeptide (PPR)repeat-containing protein	-0.899608	-0.909958	-3.30342	6.46738	-1.59083	-3.82162	0		At1g24620	8723698	8724445	Complement	F21J9.28	polcalcin putative /calcium-binding pollen allergen putative	-2.17845	-2.13165	10.1076	-2.29838	-3.98948	4.13196	10.1076
At1g28400	9972370	9973779	Complement	F3M18.16	expressed protein	-0.0939459	-2.9335	-3.3004	8.74483	-2.61257	-6.36847	0		At3g21160	7413853	7418416	Complement	MSA6.31	mannosyl-oligosaccharide12-alpha-mannosidase putative	-2.16705	-2.11209	10.0971	-2.18655	-3.98471	4.03657	10.0971
At4g33680	16171697	16174681	Complement	T16L1.170	aminotransferase class I and IIfamily protein	0.0175533	-0.808843	-3.29651	4.47246	-0.689432	-3.68811	0		At5g50030	20371815	20372853	sense	MPF21.4	invertase/pectin methylesteraseinhibitor family protein	-2.55797	-2.34273	10.0944	-1.55557	-4.68585	3.76649	10.0944
At3g51870	19254931	19257913	sense	ATEM1.12	mitochondrial substrate carrierfamily protein	2.39011	2.34365	-3.29323	-1.5764	4.69582	-0.647262	0		At3g03430	814480	814739	sense	T21P5.15	polcalcin putative /calcium-binding pollen allergen putative	-2.39597	-2.27938	10.0783	-2.19074	-4.34581	4.22198	10.0783
At5g13000	4110298	4121430	Complement	T24H18.170	glycosyl transferase family 48protein	-0.578737	-2.13925	-3.28712	8.65026	-2.39808	-5.36276	0		At5g47000	19086171	19087560	Complement	MQD22.14	peroxidase putative	-2.50613	-2.55096	10.0723	-1.88865	-4.75053	4.01065	10.0723
At4g37550	17643575	17645823	sense	F6G17.3	formamidase putative / formamideamidohydrolase putative	0.831441	-2.12475	-3.28652	5.2111	-1.0837	-5.39844	0		At1g70790	26704077	26706002	sense	F15H11.4	C2 domain-containing protein	-2.18426	-3.0463	10.0344	-1.41438	-5.01003	3.23505	10.0344
At5g67260	26853374	26855037	sense	K21H1.30	cyclin family protein	-0.724367	-0.969963	-3.28204	5.97463	-1.48577	-3.85246	0		At2g33420	14165781	14169603	sense	F4P9.19	expressed protein	-2.17646	-2.2129	10.0262	-2.50538	-4.03958	4.31433	10.0262
At3g44730	16296875	16301839	sense	T32N15.10	kinesin motor protein-related	-0.552508	-2.28337	-3.2769	8.47505	-2.4972	-5.46224	0		At3g21670	7626764	7629158	Complement	MIL23.13	nitrate transporter (NTP3)	-0.846336	-2.40573	10.0256	-3.66127	-2.88805	3.97822	10.0256
At2g26190	11154717	11157588	Complement	T1D16.17	calmodulin-binding familyprotein	3.96604	-0.685403	-3.27386	0.200313	2.5542	-3.54442	0		At3g61130	22632967	22636691	sense	T20K12.30	glycosyl transferase family 8protein	-2.05156	-2.08745	10.0108	-2.16783	-3.85789	3.91832	10.0108
At5g45800	18592809	18596324	Complement	MRA19.24	leucine-rich repeattransmembrane protein kinase putative	7.47005	-1.24676	-3.27056	-1.28402	4.13508	-4.14175	0		At3g03800	969321	971467	sense	F20H23.28	syntaxin putative (SYP131)	-1.89896	-1.82955	10.0103	-2.07993	-3.48723	3.7412	10.0103
At4g02420	1064363	1066372	Complement	T14P8.4	lectin protein kinase putative	3.08252	-1.10059	-3.26889	1.28625	1.55719	-4.01675	0		At4g27790	13850052	13851539	sense	T27E11.30	calcium-binding EF hand familyprotein	-1.90915	-1.80459	10.0082	-2.01643	-3.47927	3.69115	10.0082
At1g15930	5471431	5472978	sense	T24D18.3	40S ribosomal protein S12(RPS12A)	-0.835696	-1.67846	-3.26752	7.23126	-2.21818	-4.60705	0		At4g13560	7879557	7880379	Complement	T6G15.110	late embryogenesis abundantdomain-containing protein / LEA domain-containing protein	-2.13005	-2.35234	9.98296	-2.17446	-4.17474	3.9618	9.98296
At5g18310	6061703	6063034	sense	F20L16.30	expressed protein	5.82234	-0.392876	-3.25724	-1.29842	4.17417	-3.18516	0		At5g45840	18611307	18614448	Complement	K15I22.4	leucine-rich repeattransmembrane protein kinase putative	-0.958264	-2.78287	9.96933	-2.68453	-3.36864	3.23916	9.96933
At1g68010	25497016	25499651	sense	T23K23.14	glycerate dehydrogenase /NADH-dependent hydroxypyruvate reductase	3.55386	-1.17489	-3.25451	0.97476	1.80153	-4.13448	0		At4g02650	1156453	1158653	sense	T10P11.8	epsin N-terminal homology (ENTH)domain-containing protein / clathrin assemblyprotein-related	-1.52053	-1.60514	9.96045	-2.01289	-2.9228	3.35482	9.96045
At1g09310	3009057	3009882	sense	T31J12.3	expressed protein	-1.93567	-3.06326	-3.25168	19.2605	-4.66598	-6.29173	0		At4g02250	983970	984523	sense	T2H3.11	invertase/pectin methylesteraseinhibitor family protein	-2.3214	-2.48296	9.95981	-1.93904	-4.5065	3.89753	9.95981
At4g15770	8978009	8978877	sense	FCAALL.377	60S ribosome subunitbiogenesis protein putative	0.568661	-1.28088	-3.24995	4.28291	-0.613808	-4.21649	0		At1g49290	18236276	18237292	Complement	F13F21.27	expressed protein	-2.50252	-2.59919	9.94105	-1.70691	-4.82093	3.82604	9.94105
At2g39470	16483378	16485319	sense	F12L6.13	photosystem II reaction centerPsbP family protein	2.11697	-2.36815	-3.24736	3.61042	-0.210163	-5.66898	0		At3g54750	20275683	20279726	Complement	T5N23.110	expressed protein	-2.32914	-2.07899	9.93239	-2.32299	-4.07728	4.31203	9.93239
At1g69120	25985999	25989919	Complement	F4N2.9	floral homeotic protein APETALA1(AP1) / agamous-like MADS box protein (AGL7)	2.34175	4.86478	-3.23009	-3.7716	8.75237	0.945643	0		At3g62180	23030807	23031454	Complement	T17J13.140	invertase/pectinmethylesterase inhibitor family protein	-2.80869	-2.59476	9.93092	-1.29915	-5.21038	3.71157	9.93092
At5g09760	3032376	3034544	sense	F17I14.50	pectinesterase family protein	-1.44911	1.28103	-3.22656	3.46589	-0.129318	-1.52331	0		At3g07790	2487375	2489226	sense	MLP3.24	DGCR14-related	-2.44709	-2.4859	9.90482	-1.81754	-4.63975	3.88918	9.90482
At2g29350	12607991	12609633	sense	F16P2.27	tropinone reductase putative /tropine dehydrogenase putative	6.27657	1.22131	-3.21748	-3.57459	7.01068	-1.59189	0		At3g04360	1157011	1158316	Complement	T6K12.2	C2 domain-containing protein	-2.00248	-2.03476	9.87017	-2.16006	-3.7575	3.86473	9.87017
At2g25900	11048796	11050249	sense	F17H15.7	zinc finger (CCCH-type) familyprotein	-0.570507	-1.8161	-3.20893	7.17172	-2.09946	-4.7728	0		At2g32460	13789285	13791548	Complement	T26B15.2	myb family transcription factor(MYB101)	-1.89834	-2.06471	9.81214	-2.57178	-3.62977	4.11371	9.81214
At2g34860	14715447	14717276	sense	F19I3.9	chaperone protein dnaJ-related	2.32742	-0.56663	-3.20623	1.34348	1.45576	-3.33901	0		At5g52360	21275163	21276568	Complement	K24M7.10	actin-depolymerizing factorputative	-2.0377	-2.23439	9.75993	-2.12089	-3.97624	3.82759	9.75993
At4g15630	8917428	8918850	sense	FCAALL.230	integral membrane familyprotein	2.5532	3.59568	-3.19816	-2.98022	6.3425	0.289991	0		At4g35180	16738344	16740371	Complement	T12J5.50	amino acid transporter familyprotein	-0.502222	-3.78475	9.73376	-2.57826	-3.7594	2.66941	9.73376
At3g51570	19137337	19141435	sense	F26O13.210	disease resistance protein(TIR-NBS-LRR class) putative	2.96745	-2.55777	-3.192	2.821	0.295849	-5.61542	0		At1g12070	4078911	4080104	Complement	F12F1.5	Rho GDP-dissociation inhibitorfamily protein	-2.18739	-1.92169	9.72456	-2.15367	-3.80068	4.01439	9.72456
At3g26030	9518550	9520796	sense	MPE11.23	serine/threonine proteinphosphatase 2A (PP2A) regulatory subunit B' putative	-0.434368	-1.03263	-3.1916	5.49142	-1.28276	-3.8601	0		At5g16100	5258554	5259722	Complement	T21H19.20	hypothetical protein	-1.97748	-2.0415	9.6713	-2.2962	-3.70846	3.9418	9.6713
At3g56900	21077129	21080879	sense	T8M16.230	aladin-related /adracalin-related	0.164882	-1.45308	-3.18663	5.05183	-1.11473	-4.32634	0		At5g12180	3937025	3939597	sense	MXC9.14	calcium-dependent protein kinaseputative / CDPK putative	-2.05405	-1.94593	9.6559	-1.99294	-3.74389	3.77197	9.6559
At3g01790	283697	285767	Complement	F28J7.12	ribosomal protein L13 familyprotein	-0.300204	-1.14527	-3.17485	6.64347	-1.26632	-4.21527	0		At1g54070	20186307	20186910	sense	F15I1.15	dormancy/auxin associatedprotein-related	-2.23038	-2.12373	9.64713	-2.16997	-4.04245	4.06782	9.64713
At2g23760	10114789	10120210	Complement	F27L4.6	BEL1-like homeobox 4 protein(BLH4)	1.12943	7.11265	-3.17445	-3.7511	8.08778	1.98148	0		At1g44160	16797269	16798856	sense	T7O23.16	DNAJ chaperone C-terminaldomain-containing protein	-2.20603	-2.09744	9.59299	-2.30439	-3.96737	4.15386	9.59299
At4g34670	16548651	16550453	sense	T4L20.250	40S ribosomal protein S3A(RPS3aB)	-1.07052	-2.07098	-3.17048	9.20677	-2.80836	-5.0382	0		At4g03290	1442634	1443499	sense	F4C21.22	calcium-binding proteinputative	-2.21738	-2.04371	9.58786	-2.34365	-3.92693	4.21684	9.58786
At4g34200	16373850	16376626	Complement	F28A23.40	D-3-phosphoglyceratedehydrogenase putative / 3-PGDH putative	0.585892	-2.65703	-3.16911	6.29189	-1.74077	-5.88252	0		At3g16000	5430895	5433823	Complement	MSL1.8	matrix-localized MAR DNA-bindingprotein-related	-1.88775	-1.8023	9.55768	-2.0945	-3.43902	3.73781	9.55768
At5g20160	6803838	6805197	Complement	F5O24.50	ribosomal proteinL7Ae/L30e/S12e/Gadd45 family protein	0.120422	-1.94615	-3.16691	5.91135	-1.5745	-4.90891	0		At3g01620	235204	236932	Complement	F4P13.16	glycosyl transferase family 17protein	-2.15352	-2.08207	9.55514	-2.2711	-3.90681	4.07279	9.55514
At4g10060	6288850	6295398	sense	T5L19.190	expressed protein	4.51625	-0.0133412	-3.15914	-1.01125	3.73692	-2.70575	0		At1g04540	1237255	1239060	sense	T1G11.21	C2 domain-containing protein	-2.25533	-2.17883	9.51191	-2.28784	-4.08705	4.17304	9.51191
At3g47620	17569834	17571752	sense	F1P2.170	TCP family transcription factorputative	1.2607	-2.73858	-3.15597	5.17087	-1.1976	-6.02448	0		At2g02140	544706	545424	sense	F5O4.9	plant defensin-fusion proteinputative (PDF2.6)	-2.09157	-2.0995	9.48638	-2.28187	-3.87107	4.03819	9.48638
At1g25275	8860659	8861314	sense	F4F7.2	expressed protein	1.0165	2.69877	-3.15264	-0.66712	3.38324	-0.302872	0		At4g39610	18393564	18394739	Complement	F23K16.240	expressed protein	-2.14589	-2.16782	9.47563	-2.36745	-3.96594	4.14342	9.47563
At3g48570	18014892	18015959	Complement	T8P19.80	protein transport protein SEC61gamma subunit putative	1.83527	-2.96447	-3.1504	4.63104	-0.884307	-6.49416	0		At1g78460	29523280	29524208	Complement	T30F21.20	SOUL heme-binding familyprotein	-2.80224	-1.25621	9.47291	-2.62084	-3.66211	5.16067	9.47291
At1g29070	10149777	10151344	sense	F28N24.22	ribosomal protein L34 familyprotein	-1.50241	-1.52492	-3.14627	9.61409	-2.72037	-4.38464	0		At5g48140	19535996	19537752	Complement	MIF21.3	polygalacturonase putative /pectinase putative	-2.3096	-2.30746	9.45646	-1.99156	-4.29936	3.93864	9.45646
At3g55090	20427319	20429481	Complement	T15C9.80	ABC transporter family protein	-0.519737	-0.684518	-3.14571	5.04358	-1.05181	-3.42409	0		At2g39700	16550910	16552662	Complement	F17A14.7	expansin putative (EXP4)	-3.6418	-2.77142	9.45199	-0.220321	-6.5748	3.31658	9.45199
At3g28220	10525641	10527965	sense	T19D11.1	meprin and TRAF homologydomain-containing protein / MATH domain-containingprotein	7.89009	-3.06073	-3.12992	-0.0115796	2.67758	-6.1923	0		At1g01460	168723	171165	sense	F22L4.2	phosphatidylinositol-4-phosphate5-kinase family protein	-1.92294	-1.95967	9.40525	-2.23407	-3.5903	3.85395	9.40525
														At4g27350	13690827	13692800	Complement	M4I22.160	expressed protein	-1.85226	-2.63917	9.39296	-2.02848	-4.16158	3.50917	9.39296
														At1g18990	6558669	6560480	Complement	F14D16.14	expressed protein	-1.89883	-2.10554	9.38428	-2.51451	-3.666	4.05395	9.38428
														At4g16745	9411914	9414133	sense	FCAALL.132	exostosin family protein	-1.37199	-2.62012	9.3812	-2.29768	-3.65116	3.3001	9.3812
														At3g01700	258886	259638	sense	F4P13.24	arabinogalactan-protein (AGP11)	-2.77987	-2.4403	9.3806	-1.50463	-4.93335	3.88072	9.3806
														At4g01575	681868	682583	Complement	T15B16.19	serine protease inhibitorKazal-type family protein	-2.49774	-2.54983	9.36542	-1.23087	-4.86766	3.36322	9.36542
														At1g17540	6029671	6032634	Complement	F1L3.25	protein kinase-related	-1.96779	-2.20677	9.34247	-2.251	-3.84981	3.86536	9.34247
														At4g26260	13297948	13300186	sense	T25K17.70	expressed protein	-2.51069	-2.17817	9.31017	-1.32175	-4.51809	3.50515	9.31017
														At4g18640	10259695	10263775	sense	F28A21.50	leucine-rich repeattransmembrane protein kinase putative	-2.63053	-2.61858	9.28692	-1.0246	-5.10397	3.26893	9.28692
														At1g02790	610448	612294	Complement	F22D16.22	exopolygalacturonase /galacturan 14-alpha-galacturonidase (PGA3) / pectinase	-2.39987	-2.28001	9.28031	-1.63376	-4.41148	3.67784	9.28031
														At5g64510	25801630	25803533	sense	T12B11.1	expressed protein	-0.618292	-2.24893	9.24332	-3.73709	-2.52797	3.79213	9.24332
														At5g27870	9878995	9881810	Complement	F14I23.30	pectinesterase family protein	-1.98022	-1.96395	9.18567	-2.19476	-3.64606	3.8659	9.18567
														At4g22640	11911611	11912019	sense	F7K2.220	expressed protein	-1.9574	-2.03913	9.18555	-2.30151	-3.67016	3.90613	9.18555
														At4g25150	12901631	12903135	Complement	F13M23.290	acid phosphatase putative	-2.46768	-2.47337	9.17665	-1.28101	-4.74015	3.38678	9.17665
														At5g54095	21969959	21970723	Complement	MJP23.1	expressed protein	-1.8793	-2.21783	9.17391	-1.88596	-3.83506	3.46083	9.17391
														At3g28720	10783513	10785684	sense	T19N8.1	expressed protein	-2.63574	-2.44654	9.16446	-1.23312	-4.882	3.4923	9.16446
														At1g75870	28490193	28490775	sense	T4O12.11	hypothetical protein	-2.30172	-2.39191	9.14203	-1.9039	-4.36228	3.82449	9.14203
														At1g50610	18745803	18748393	sense	F11F12.7	leucine-rich repeattransmembrane protein kinase putative	-1.95856	-2.00526	9.10288	-2.2677	-3.64479	3.88557	9.10288
														At2g25600	10901681	10905447	sense	F3N11.5	potassium channel proteinputative	-2.09193	-1.90965	9.07806	-2.26381	-3.67819	4.02055	9.07806
														At3g47230	17403084	17404684	Complement	F13I12.280	expressed protein	-5.70185	-0.806302	9.05708	-0.478571	-5.83311	5.31986	9.05708
														At5g39420	15789308	15792399	sense	MUL8.100	protein kinase family protein	-2.21697	-2.33113	9.04894	-1.85875	-4.23705	3.71338	9.04894
														At5g56640	22944555	22946869	Complement	MIK19.9	expressed protein	-1.74202	-1.88161	9.04865	-2.01871	-3.36386	3.48161	9.04865
														At5g20820	7046753	7047398	Complement	T1M15.220	auxin-responsiveprotein-related	-3.01259	-2.16553	9.0223	-1.24108	-4.92213	3.8413	9.0223
														At1g28270	9883025	9883857	sense	F3H9.8	rapid alkalinization factor (RALF)family protein	-2.37189	-2.3306	9.0063	-1.76099	-4.39193	3.76214	9.0063
														At4g29340	14447653	14448704	sense	F17A13.160	profilin 3 (PRO3) (PFN3)	-1.89554	-1.88279	8.96201	-2.18867	-3.47949	3.76908	8.96201
														At4g15980	9057478	9059995	Complement	FCAALL.248	pectinesterase family protein	-2.04712	-1.83437	8.9401	-2.24806	-3.56358	3.96726	8.9401
														At2g41860	17474422	17476864	Complement	T11A7.4	calcium-dependent protein kinaseputative / CDPK putative	-2.04414	-1.96097	8.93332	-2.29348	-3.67426	3.991	8.93332
														At3g54210	20078525	20079413	Complement	F24B22.170	ribosomal protein L17 familyprotein	-2.07648	-2.00735	8.89877	-2.16987	-3.75946	3.90048	8.89877
														At1g49490	18321231	18323774	Complement	F13F21.7	leucine-rich repeat familyprotein / extensin family protein	-2.00355	-1.90238	8.87389	-2.01615	-3.62685	3.72875	8.87389
														At1g04700	1316918	1320918	sense	T1G11.5	protein kinase family protein	-2.46703	-1.97197	8.86487	-1.62634	-4.15986	3.75003	8.86487
														At1g15380	5290740	5292462	sense	F9L1.33	lactoylglutathione lyase familyprotein / glyoxalase I family protein	-1.58602	-1.25444	8.85604	-3.68151	-2.52523	4.87995	8.85604
														At1g19500	6754943	6755527	Complement	F18O14.44	hypothetical protein	-2.04308	-2.24275	8.8262	-1.92279	-3.97961	3.62072	8.8262
														At3g11650	3676152	3677043	Complement	T19F11.5	harpin-induced family protein /HIN1 family protein / harpin-responsive family protein /NDR1/HIN1-like protein 2	-3.72399	-0.452631	8.81561	-2.29194	-3.62995	5.89737	8.81561
														At1g60240	22218866	22219695	Complement	T13D8.13	apical meristem formationprotein-related	-2.06338	-1.80259	8.81319	-2.33715	-3.53282	4.05642	8.81319
														At5g13990	4514570	4516894	Complement	MAC12.17	exocyst subunit EXO70 familyprotein	-1.99911	-1.73578	8.7995	-2.30185	-3.41351	3.96935	8.7995
														At5g37170	14730041	14731533	sense	MJG14.10	O-methyltransferase family 2protein	-3.56071	-1.642	8.77482	-1.18603	-4.88581	4.31826	8.77482
														At3g44000	15798214	15799726	Complement	T15B3.140	Mutator-like transposase familyhas a 1.9e-07 P-value blast match to GB:AAA21566 mudrA oftransposon='MuDR' (MuDr-element) [Zea mays]	-1.67775	-1.9694	8.76846	-1.99882	-3.37422	3.37341	8.76846
														At4g30290	14828718	14830022	Complement	F17I23.370	xyloglucan:xyloglucosyltransferase putative / xyloglucan endotransglycosylaseputative / endo-xyloglucan transferase putative	-1.93428	-1.02448	8.76079	-3.24461	-2.63744	4.94002	8.76079
														At2g33460	14181666	14182914	Complement	F4P9.23	p21-rho-binding domain-containingprotein	-1.91942	-1.73498	8.74127	-2.75058	-3.30405	4.29969	8.74127
														At1g30710	10895262	10896975	sense	T5I8.16	FAD-binding domain-containingprotein	-2.28054	-1.98587	8.71986	-2.17242	-3.9118	4.08043	8.71986
														At3g47400	17476575	17479103	sense	T21L8.150	pectinesterase family protein	-2.30198	-2.20018	8.70306	-1.83387	-4.17512	3.76281	8.70306
														At5g16540	5403191	5405157	sense	MQK4.29	zinc finger (CCCH-type) familyprotein	-1.77654	-2.32695	8.69022	-1.98535	-3.78901	3.4104	8.69022
														At5g12000	3874229	3876781	Complement	F14F18.170	protein kinase family protein	-1.97584	-2.06284	8.67311	-2.12756	-3.71827	3.76065	8.67311
														At1g01310	120154	121130	sense	F6F3.11	allergen V5/Tpx-1-related familyprotein	-2.00358	-2.00048	8.66127	-2.20433	-3.67654	3.86398	8.66127
														At1g07590	2336520	2339388	Complement	F22G5.3	pentatricopeptide (PPR)repeat-containing protein	-1.16628	-2.22585	8.63201	-3.02557	-3.03626	3.7467	8.63201
														At5g09550	2964554	2966728	sense	F17I14.260	Rab GDP dissociationinhibitor putative	-1.87593	-1.74843	8.62966	-2.2965	-3.31637	3.85664	8.62966
														At3g28780	10807155	10809426	Complement	T19N8.7	glycine-rich protein	-1.73259	-2.09148	8.61815	-2.19254	-3.51061	3.58414	8.61815
														At1g24520	8688617	8689251	sense	F21J9.18	anther-specific protein agp1	-2.40282	-2.5256	8.58149	-1.4478	-4.62402	3.46237	8.58149
														At3g13370	4341671	4342237	sense	MDC11.21	hypothetical protein	-2.53383	-2.46313	8.57584	-1.14913	-4.77088	3.30218	8.57584
														At1g71770	26994170	26997109	Complement	F14O23.15	polyadenylate-binding protein 5(PABP5)	-2.84414	-3.2126	8.5212	-0.0152236	-6.30336	2.44202	8.5212
														At5g19580	6607373	6609628	Complement	T20D1.100	glyoxal oxidase-related	-2.459	-2.72386	8.51157	-1.15466	-4.91794	3.22286	8.51157
														At5g17400	5728793	5730378	Complement	T10B6.60	ADP ATP carrier proteinmitochondrial putative / ADP/ATP translocase putative /adenine nucleotide translocator putative	-2.18277	-1.60364	8.48303	-2.04337	-3.47992	3.92836	8.48303
														At4g07960	4802338	4805644	Complement	F1K3.3	glycosyl transferase family 2protein	-2.3731	-2.12769	8.44572	-1.643	-4.19482	3.65257	8.44572
														At3g45250	16594708	16595133	sense	F18N11.10	gypsy-like retrotransposonfamilyhas a 9.2e-08 P-value blast match to GB:AAD22153polyprotein (Gypsy_Ty3-element) [Sorghum bicolor]	-2.0126	-1.65848	8.41183	-1.84208	-3.40892	3.58595	8.41183
														At2g47340	19439238	19440086	sense	T8I13.18	invertase/pectin methylesteraseinhibitor family protein	-2.00109	-1.9369	8.39472	-2.21229	-3.59879	3.8502	8.39472
														At5g59370	23967049	23969048	sense	F2O15.3	actin 4 (ACT4)	-2.03693	-2.06436	8.38276	-1.9868	-3.77702	3.66978	8.38276
														At5g40730	16318303	16318748	sense	MNF13.250	arabinogalactan-protein(AGP24)	-2.7004	-0.913156	8.37637	-2.4448	-3.22276	4.91292	8.37637
														At5g40155	16079119	16079965	sense	MSN9.6	expressed protein	-2.31786	-1.92735	8.37027	-1.70917	-3.94944	3.69011	8.37027
														At1g61860	22866524	22868284	Complement	F8K4.7	protein kinase putative	-2.15005	-1.90514	8.3673	-2.14724	-3.71165	3.93856	8.3673
														At2g47050	19338755	19339716	Complement	F14M4.12	invertase/pectin methylesteraseinhibitor family protein	-2.67156	-2.22355	8.36349	-1.37182	-4.5888	3.64473	8.36349
														At1g52580	19591306	19592721	sense	F6D8.20	rhomboid family protein	-2.22335	-1.53956	8.36172	-2.25031	-3.4303	4.16453	8.36172
														At5g51030	20765088	20766578	Complement	K3K7.21	short-chaindehydrogenase/reductase (SDR) family protein	-0.751509	-2.07679	8.35746	-3.30996	-2.50517	3.56656	8.35746
														At1g75160	28213098	28215465	sense	F22H5.11	expressed protein	-1.78584	-1.59025	8.30615	-2.23591	-3.08152	3.72099	8.30615
														At2g19050	8260498	8262616	sense	T20K24.6	GDSL-motif lipase/hydrolasefamily protein	-1.93296	-1.80626	8.30569	-2.11592	-3.42674	3.71662	8.30569
														At1g67290	25194684	25196900	Complement	F1N21.11	glyoxal oxidase-related	-1.99741	-1.98162	8.28414	-2.18518	-3.63646	3.81917	8.28414
														At3g24670	9006212	9008808	Complement	MSD24.10	pectate lyase family protein	-1.92924	-1.64596	8.25505	-2.12176	-3.27911	3.75605	8.25505
														At5g14380	4635800	4636679	Complement	F18O22.170	hydroxyproline-richglycoprotein family protein	-2.28654	-2.39766	8.21866	-1.51914	-4.36281	3.42407	8.21866
														At3g50280	18648836	18650167	sense	F11C1.120	transferase family protein	-1.47416	-2.29669	8.21775	-2.13169	-3.44576	3.25411	8.21775
														At4g38190	17909913	17913635	Complement	F20D10.310	cellulose synthase familyprotein	-1.67634	-1.93859	8.21203	-2.54259	-3.26954	3.83238	8.21203
														At3g06790	2143494	2145782	Complement	F3E22.7	plastid developmental proteinDAG putative	-1.87309	-1.96145	8.10501	-2.05832	-3.51696	3.5907	8.10501
														At5g61710	24817271	24817738	sense	K11J9.23	hypothetical protein	-1.09504	-1.74198	8.0753	-2.32786	-2.57854	3.13219	8.0753
														At2g17890	7776967	7779709	Complement	T13L16.9	calcium-dependent protein kinasefamily protein / CDPK family protein	-1.74757	-1.49986	8.03982	-1.95941	-2.9933	3.46484	8.03982
														At2g21480	9209833	9212448	Complement	F3K23.24	protein kinase family protein	-2.09146	-1.78728	8.03855	-2.12093	-3.53831	3.8535	8.03855
														At5g03760	985698	990546	Complement	F17C15.180	glycosyl transferase family 2protein	-3.76017	-1.41692	8.0092	-0.845374	-4.84706	4.1213	8.0092
														At1g49270	18231002	18233895	Complement	F13F21.28	protein kinase family protein	-2.3058	-1.82938	7.98827	-1.63804	-3.83815	3.60844	7.98827
														At1g70540	26597593	26598305	sense	F24J13.11	invertase/pectin methylesteraseinhibitor family protein	-1.91261	-1.86098	7.98379	-2.30442	-3.42429	3.84132	7.98379
														At3g52420	19440753	19440947	sense	F22O6.200	outer envelope membraneprotein putative	-2.10927	-2.04312	7.98202	-1.87363	-3.81395	3.61321	7.98202
														At5g14890	4817952	4821811	sense	T9L3.1	NHL repeat-containing protein	-1.76847	-2.01193	7.98086	-2.22863	-3.43843	3.62332	7.98086
														At4g05330	2720558	2723122	Complement	C6L9.10	zinc finger and C2 domainprotein putative	-2.22489	-1.93686	7.95683	-1.36126	-3.92999	3.27296	7.95683
														At5g39880	15988115	15989465	sense	MYH19.7	expressed protein	-2.31293	-2.30069	7.94063	-1.5271	-4.27476	3.45315	7.94063
														At3g22880	8097694	8100827	Complement	F5N5.6	meiotic recombination proteinputative	1.40325	-4.02979	7.9396	-3.8694	-2.03094	1.87833	7.9396
														At1g26480	9156319	9157937	Complement	T1K7.15	14-3-3 protein GF14 iota (GRF12)	-1.72097	-1.90904	7.92483	-1.73998	-3.36478	3.15928	7.92483
														At3g25870	9464553	9465520	Complement	MPE11.2	expressed protein	-2.46209	-2.27627	7.90289	-0.820972	-4.60021	2.92395	7.90289
														At1g74000	27832803	27835060	Complement	F2P9.13	strictosidine synthase familyprotein	-1.68333	-2.32042	7.89656	-1.91685	-3.66906	3.24124	7.89656
														At4g35700	16923324	16924325	sense	F8D20.210	zinc finger (C2H2 type) familyprotein	-1.94634	-2.01343	7.89221	-2.0468	-3.61492	3.62094	7.89221
														At3g26810	9869082	9871877	sense	MDJ14.9	transport inhibitor responseprotein putative	-1.92692	-1.88259	7.85728	-1.74313	-3.53331	3.36614	7.85728
														At4g28000	13925462	13929286	sense	T13J8.110	AAA-type ATPase family protein	-1.93223	-1.84069	7.85238	-1.90909	-3.47152	3.52063	7.85238
														At3g59470	21989938	21991521	Complement	F25L23.1	far-red impaired responsivefamily protein / FAR1 family protein	-1.55016	-2.61662	7.84255	-1.75877	-3.82078	2.95273	7.84255
														At3g25150	9156964	9159910	Complement	MJL12.17	nuclear transport factor 2(NTF2) family protein / RNA recognition motif(RRM)-containing protein	-2.10413	-2.06191	7.82977	-1.96526	-3.80169	3.68225	7.82977
														At2g27180	11627311	11628252	sense	T22O13.5	expressed protein	-2.04188	-2.03264	7.81243	-2.05253	-3.70896	3.70655	7.81243
														At2g38500	16124505	16126177	Complement	T6A23.30	expressed protein	-1.78626	-1.7063	7.8101	-2.06318	-3.19666	3.53975	7.8101
														At5g56750	22975103	22978142	sense	MIK19.22	Ndr family protein	-2.25042	-1.30281	7.80657	-2.15419	-3.22079	4.11183	7.80657
														At5g25340	8793021	8794966	sense	F18G18.80	expressed protein	-1.9236	-1.8065	7.79919	-2.08603	-3.40503	3.6676	7.79919
														At2g44560	18398990	18400730	Complement	F16B22.5	glycosyl hydrolase family 9protein	-1.91536	-1.93348	7.77018	-2.07536	-3.5086	3.62722	7.77018
														At5g47540	19300492	19302554	Complement	MNJ7.13	Mo25 family protein	-1.71835	-0.925415	7.74353	-2.6648	-2.36604	4.19645	7.74353
														At3g48420	17940632	17942686	sense	T29H11.1	haloacid dehalogenase-likehydrolase family protein	-1.48746	-1.77755	7.73784	-2.31855	-2.96313	3.47305	7.73784
														At2g35210	14843141	14845228	sense	T4C15.12	human Rev interacting-likefamily protein / hRIP family protein	-1.98562	-1.69374	7.73745	-1.78652	-3.39524	3.46927	7.73745
														At1g61290	22608853	22609881	sense	T1F9.22	syntaxin putative (SYP124)	-1.62306	-1.97088	7.73043	-2.19217	-3.26642	3.45516	7.73043
														At5g54780	22265999	22269089	Complement	MBG8.4	RabGAP/TBC domain-containingprotein	-1.41667	-1.46282	7.72307	-2.87841	-2.57757	3.92613	7.72307
														At3g22690	8020764	8024541	Complement	MWI23.6	pentatricopeptide (PPR)repeat-containing protein	-0.185639	-0.183772	7.70652	-6.86985	-0.320477	5.68687	7.70652
														At1g78940	29685750	29688855	Complement	YUP8H12R.45	protein kinase familyprotein	-2.19758	-2.13158	7.6215	-1.20142	-4.07102	3.04898	7.6215
														At5g18910	6306830	6309421	Complement	F17K4.160	protein kinase family protein	-2.00699	-1.70255	7.60967	-1.78927	-3.42043	3.49452	7.60967
														At4g39180	18243768	18248799	Complement	T22F8.80	SEC14 cytosolic factor putative/ phosphoglyceride transfer protein putative	-2.15418	-0.732612	7.60003	-3.06629	-2.54177	4.92598	7.60003
														At3g28100	10457372	10462202	sense	MMG15.28	nodulin MtN21 family protein	-1.84623	-1.75616	7.56073	-2.16919	-3.26758	3.65225	7.56073
														At1g64740	24053671	24056150	sense	F13O11.5	tubulin alpha-1 chain (TUA1)	-1.55794	-0.870109	7.52779	-3.36201	-2.14422	4.57973	7.52779
														At5g46770	18994635	18995387	sense	MZA15.19	expressed protein	-1.66875	-2.00147	7.50857	-2.14965	-3.32826	3.44839	7.50857
														At1g52240	19459435	19461535	Complement	F9I5.12	expressed protein	-2.00608	-1.80858	7.49241	-1.85892	-3.49041	3.51641	7.49241
														At4g34750	16577571	16578357	sense	T4L20.330	auxin-responsive proteinputative / small auxin up RNA (SAUR_E)	-2.03374	-2.47	7.48682	-1.28442	-4.19199	2.9586	7.48682
														At2g28180	12018071	12020909	Complement	F24D13.3	cation/hydrogen exchangerputative (CHX8)	-1.96261	-1.87948	7.48348	-2.0385	-3.48903	3.62348	7.48348
														At3g04690	1273392	1275944	Complement	F7O18.16	protein kinase family protein	-1.559	-1.99203	7.48115	-2.14379	-3.22037	3.33575	7.48115
														At5g19360	6521718	6523782	Complement	F7K24.110	calcium-dependent proteinkinase putative / CDPK putative	-1.82218	-1.91716	7.46463	-1.71327	-3.44628	3.20923	7.46463
														At3g60540	22385938	22386840	Complement	T8B10.200	sec61beta family protein	-1.98718	-1.99029	7.45434	-1.73213	-3.65127	3.36373	7.45434
														At4g18700	10288809	10290861	Complement	F28A21.110	CBL-interacting protein kinase12 (CIPK12)	-2.57595	0.0669295	7.45386	-3.57679	-2.13965	6.03107	7.45386
														At3g20270	7067065	7070952	sense	MQC12.2	lipid-binding serum glycoproteinfamily protein	0.145516	-1.93167	7.44214	-4.39997	-1.54109	3.49906	7.44214
														At1g10970	3665089	3667139	Complement	T19D16.11	metal transporter putative(ZIP4)	-2.52736	-1.1981	7.38208	-1.78463	-3.37887	4.00256	7.38208
														At2g36660	15368400	15371477	Complement	F13K3.6	polyadenylate-binding proteinputative / PABP putative	-2.20991	-1.74953	7.37712	-1.14825	-3.74974	3.05197	7.37712
														At3g01630	237223	239120	sense	F4P13.17	nodulin-related	-1.64847	-1.73944	7.37588	-2.17897	-3.07044	3.47697	7.37588
														At2g02970	865069	868288	Complement	T17M13.14	nucleoside phosphatase familyprotein / GDA1/CD39 family protein	-1.86174	-0.96606	7.36422	-2.61171	-2.52144	4.20279	7.36422
														At4g33970	16279800	16281899	Complement	F17I5.160	leucine-rich repeat familyprotein / extensin family protein	-1.50343	-1.70509	7.35332	-2.36583	-2.8948	3.51476	7.35332
														At2g46300	19015364	19016631	sense	T3F17.5	expressed protein	-2.09833	-1.78651	7.34523	-1.75492	-3.55465	3.4955	7.34523
														At4g04980	2544208	2546831	Complement	T32N4.10	hydroxyproline-rich glycoproteinfamily protein	-1.58922	-1.86871	7.34016	-2.01987	-3.14903	3.27126	7.34016
														At3g10410	3235296	3238089	Complement	F13M14.32	serine carboxypeptidase IIIputative	-1.76346	-1.73896	7.33495	-2.17265	-3.16919	3.57021	7.33495
														At2g07180	2980896	2983448	Complement	T25N22.14	protein kinase putative	-0.856187	-2.98462	7.33141	-1.88934	-3.43555	2.40876	7.33141
														At4g33230	16026595	16028758	Complement	F4I10.160	pectinesterase family protein	-1.32337	-1.8647	7.31629	-2.33527	-2.87381	3.2921	7.31629
														At2g18480	8016664	8018325	Complement	T30D6.6	mannitol transporter putative	-0.667548	-1.76197	7.31113	-3.10772	-2.14742	3.30666	7.31113
														At3g13630	4457045	4457996	sense	MMM17.2	hypothetical protein	-2.17599	-1.78687	7.30393	-1.30166	-3.70322	3.15223	7.30393
														At2g03410	1033904	1034950	sense	T4M8.16	Mo25 family protein	-1.26559	-2.06857	7.26507	-2.42186	-2.98982	3.2905	7.26507
														At3g01250	79312	80112	sense	T4P13.6	expressed protein	-1.95912	-1.82093	7.23006	-1.77131	-3.45952	3.38721	7.23006
														At3g02555	539712	541510	Complement	F16B3.37	expressed protein	-2.58108	-1.97107	7.22284	-0.785942	-4.36147	2.99663	7.22284
														At4g17790	9891064	9892807	sense	FCAALL.62	expressed protein	-2.50318	-1.70261	7.22087	-1.40298	-3.87429	3.53259	7.22087
														At5g01700	260723	263448	Complement	F7A7.220	protein phosphatase 2C putative/ PP2C putative	-1.77114	-1.77688	7.21706	-1.85465	-3.2408	3.2899	7.21706
														At2g19980	8634780	8635301	Complement	T2G17.22	allergen V5/Tpx-1-related familyprotein	-1.64127	-1.50591	7.21155	-1.91971	-2.87776	3.28128	7.21155
														At2g21990	9366436	9367744	Complement	F7D8.31	expressed protein	-1.83342	-2.00068	7.20132	-1.7501	-3.50489	3.22589	7.20132
														At4g03620	1607038	1608663	Complement	T5L23.11	myosin heavy chain-related	-1.85679	-1.8196	7.18031	-1.84944	-3.35142	3.35233	7.18031
														At5g03690	963147	965049	Complement	F17C15.110	fructose-bisphosphatealdolase putative	-2.02284	-1.89871	7.17451	-1.5572	-3.61421	3.23927	7.17451
														At1g73860	27774647	27780518	Complement	F2P9.27	kinesin motor protein-related	-1.93578	-1.59081	7.16214	-1.72272	-3.23789	3.35311	7.16214
														At2g10970	4339921	4340661	Complement	F15K19.4	invertase/pectin methylesteraseinhibitor family protein	-1.57428	-1.59212	7.13631	-2.17384	-2.86151	3.40287	7.13631
														At1g10620	3509002	3511976	Complement	F20B24.6	protein kinase family protein	-1.94746	-1.34891	7.12255	-1.8079	-3.01453	3.48517	7.12255
														At1g28550	10036952	10037684	Complement	F1K23.21	Ras-related GTP-binding proteinputative	-1.78889	-1.72516	7.10371	-1.93625	-3.19546	3.38019	7.10371
														At5g42490	17005837	17009850	Complement	MDH9.19	kinesin motor family protein	-1.77342	-1.69872	7.08518	-1.91955	-3.16325	3.36618	7.08518
														At3g46490	17126614	17130275	sense	F12A12.10	oxidoreductase 2OG-Fe(II)oxygenase family protein	-1.94101	-1.69138	7.05991	-1.87813	-3.30246	3.46743	7.05991
														At3g55150	20451527	20453581	Complement	T26I12.30	exocyst subunit EXO70 familyprotein	-1.76385	-1.58592	7.03835	-1.81744	-3.06326	3.2769	7.03835
														At1g15350	5278259	5279861	Complement	F9L1.29	expressed protein	-1.81415	-0.98954	7.02607	-2.57825	-2.49709	4.0928	7.02607
														At5g51950	21123171	21125831	Complement	MSG15.3	glucose-methanol-choline (GMC)oxidoreductase family protein	-6.81133	0.122838	6.97582	-0.207727	-5.31126	5.79696	6.97582
														At5g42340	16945314	16947583	Complement	K5J14.17	armadillo/beta-catenin repeatfamily protein / U-box domain-containing protein	-1.68849	-1.6603	6.96057	-2.10225	-3.02408	3.43026	6.96057
														At2g37980	15901135	15904688	Complement	T8P21.11	expressed protein	-1.51481	-1.43927	6.95478	-2.48859	-2.64454	3.63217	6.95478
														At2g20700	8932029	8932813	Complement	F5H14.33	expressed protein	-2.63186	-2.07482	6.92039	-0.743281	-4.45381	2.98438	6.92039
														At1g52680	19621811	19622680	Complement	F6D8.10	late embryogenesis abundantprotein-related / LEA protein-related	-1.61758	-1.67852	6.9126	-1.73225	-3.02422	3.05578	6.9126
														At5g41780	16740303	16742061	sense	K16L22.6	myosin heavy chain-related	-1.52917	-1.56804	6.90721	-1.91099	-2.82402	3.14713	6.90721
														At4g19230	10521390	10523972	sense	T18B16.200	cytochrome P450 familyprotein	-3.4055	-1.42652	6.90404	-0.765205	-4.46495	3.69554	6.90404
														At2g14490	6172081	6173068	Complement	T13P21.13	pseudogene ARFGTPase-activating domain-containing proteinsimilar to zinc finger and C2 domain protein GI:9957238from [Arabidopsis thaliana]	-1.47564	-1.45423	6.90099	-1.46705	-2.72444	2.71456	6.90099
														At3g02480	512321	513034	sense	F16B3.11	ABA-responsive protein-related	0.428975	-2.99973	6.87591	-2.81051	-2.13116	1.9491	6.87591
														At4g26400	13344857	13346583	Complement	M3E9.170	zinc finger (C3HC4-type RINGfinger) family protein	-2.0863	-2.42432	6.87483	-0.859923	-4.25079	2.60498	6.87483
														At1g05020	1435253	1437666	Complement	T7A14.11	epsin N-terminal homology (ENTH)domain-containing protein / clathrin assemblyprotein-related	-1.36813	-1.73822	6.86372	-2.15858	-2.80149	3.175	6.86372
														At1g13970	4779520	4782531	Complement	F16A14.19	expressed protein	-2.78481	0.0397981	6.86368	-2.88817	-2.33652	5.55191	6.86368
														At5g47470	19271825	19273605	sense	MNJ7.6	nodulin MtN21 family protein	-1.45227	-1.70244	6.86308	-2.05324	-2.85582	3.17064	6.86308
														At2g38240	16018360	16021831	Complement	F16M14.17	oxidoreductase 2OG-Fe(II)oxygenase family protein	-0.666675	-0.556881	6.8528	-4.79951	-1.0655	4.76362	6.8528
														At2g46360	19035561	19036088	sense	F11C10.5	expressed protein	-2.00221	-1.8021	6.84324	-1.7488	-3.45223	3.37725	6.84324
														At5g09430	2932163	2933363	sense	T5E8.230	hydrolase alpha/beta foldfamily protein	-1.86793	-1.21729	6.82511	-2.32937	-2.75914	3.84678	6.82511
														At4g37280	17546578	17549409	Complement	AP22.79	MRG family protein	-2.47368	-2.03295	6.7938	-0.648636	-4.32219	2.75796	6.7938
														At5g17480	5762691	5762942	sense	K3M16.50	polcalcin putative /calcium-binding pollen allergen putative	-1.73491	-1.67287	6.79168	-1.94542	-3.08373	3.32495	6.79168
														At4g27110	13599242	13601527	Complement	T24A18.60	phytochelatinsynthetase-related	-1.84323	-1.43437	6.76689	-2.11536	-2.94781	3.59984	6.76689
														At3g24560	8963767	8966968	sense	MOB24.14	expressed protein	-1.62144	-1.69204	6.7475	-1.84257	-3.01173	3.13152	6.7475
														At5g15600	5078203	5079094	sense	T20K14.210	expressed protein	-1.82725	-1.81896	6.74656	-1.64933	-3.33145	3.14294	6.74656
														At3g04630	1258637	1260874	sense	F7O18.11	expressed protein	-2.25948	-3.72698	6.72358	0.520372	-6.16922	1.46102	6.72358
														At1g54280	20266433	20270960	Complement	F20D21.10	haloacid dehalogenase-likehydrolase family protein	-1.72332	-1.62277	6.72313	-1.91681	-3.02904	3.29166	6.72313
														At5g05070	1496897	1498458	sense	MUG13.7	zinc finger (DHHC type) familyprotein	-1.42585	-1.60697	6.7143	-2.2178	-2.72706	3.28777	6.7143
														At3g11700	3698845	3701499	sense	T19F11.10	beta-Ig-H3 domain-containingprotein / fasciclin domain-containing protein	-1.56711	-1.56604	6.71346	-1.97837	-2.83779	3.21992	6.71346
														At1g19890	6905025	6906009	sense	F6F9.5	histone H3 putative	-1.54619	-1.46053	6.68406	-2.05015	-2.7169	3.27534	6.68406
														At2g28640	12291702	12293722	Complement	T8O18.7	exocyst subunit EXO70 familyprotein	-1.36326	-1.68926	6.67022	-2.04933	-2.75749	3.07734	6.67022
														At1g02000	345812	347592	sense	F22M8.13	NAD-dependentepimerase/dehydratase family protein	-1.482	-1.11585	6.66694	-2.74824	-2.3066	3.86557	6.66694
														At5g35090	13375644	13376318	sense	F7N22.40	expressed protein	-1.81716	-1.73698	6.6505	-1.67613	-3.23801	3.15155	6.6505
														At5g27000	9498055	9503137	sense	F2P16.12	kinesin motor protein-related	-3.57938	0.49695	6.64712	-2.53796	-2.52314	6.1159	6.64712
														At4g38230	17928671	17931176	Complement	F20D10.350	calcium-dependent proteinkinase putative / CDPK putative	-1.68263	-1.23129	6.64702	-2.32922	-2.60666	3.66934	6.64702
														At3g57100	21144235	21145314	Complement	F24I3.180	hypothetical protein	-1.43818	-1.48104	6.63424	-2.43347	-2.60766	3.48939	6.63424
														At1g79910	30059803	30062063	sense	F19K16.13	expressed protein	-1.57389	-1.36369	6.60523	-2.32911	-2.62919	3.54523	6.60523
														At3g13050	4176518	4179073	sense	MGH6.18	transporter-related	-1.12501	-1.85541	6.6015	-2.25631	-2.66921	3.01683	6.6015
														At1g44120	16783050	16789854	sense	T7O23.25	C2 domain-containing protein /armadillo/beta-catenin repeat family protein	-1.96289	-1.67458	6.59164	-1.64022	-3.3073	3.24791	6.59164
														At3g54000	20007585	20009601	sense	F5K20.300	expressed protein	-1.77479	-1.66666	6.59088	-1.68992	-3.13608	3.13561	6.59088
														At3g57360	21236549	21237662	sense	F28O9.210	expressed protein	-1.76751	-1.40713	6.5897	-2.0545	-2.85831	3.48299	6.5897
														At5g55490	22496048	22498129	Complement	MTE17.20	expressed protein	-1.12373	-1.73376	6.58364	-1.94783	-2.58759	2.76503	6.58364
														At5g44300	17862398	17863421	Complement	K9L2.6	dormancy/auxin associated familyprotein	-1.42738	-1.4754	6.56143	-2.35404	-2.59683	3.4136	6.56143
														At2g31830	13539982	13544742	Complement	F20M17.13	endonuclease/exonuclease/phosphatase family protein	-1.57184	-1.596	6.55658	-1.81227	-2.87881	3.06644	6.55658
														At5g55980	22687527	22687868	sense	MYN21.10	serine-rich protein-related	-1.83402	-1.54128	6.5326	-1.79994	-3.05739	3.29244	6.5326
														At1g78000	29334629	29338040	sense	F28K19.22	sulfate transporter (Sultr1	0.652605	-2.82101	6.52161	-3.26799	-1.80451	2.10114	6.52161
														At4g30850	15020188	15022451	Complement	T10C21.5	expressed protein	-1.97961	-1.87296	6.52007	-0.967144	-3.64447	2.64682	6.52007
														At3g01240	78383	79044	Complement	T4P13.7	expressed protein	-1.7788	-1.77083	6.51727	-1.84725	-3.20003	3.25651	6.51727
														At5g47620	19319496	19321963	Complement	MNJ7.21	heterogeneous nuclearribonucleoprotein putative / hnRNP putative	-1.65065	-1.1338	6.49999	-2.40953	-2.48161	3.71417	6.49999
														At2g19010	8250171	8252460	sense	F19F24.4	GDSL-motif lipase/hydrolasefamily protein	-1.57198	-1.49914	6.49352	-2.04647	-2.76589	3.2753	6.49352
														At3g05150	1440086	1443527	sense	T12H1.11	sugar transporter familyprotein	-1.68155	-1.03191	6.48562	-2.13527	-2.43767	3.56523	6.48562
														At3g20160	7039001	7040035	sense	MAL21.19	geranylgeranyl pyrophosphatesynthase putative / GGPP synthetase putative /farnesyltranstransferase putative	-1.82187	-1.82555	6.46498	-1.35853	-3.35929	2.85863	6.46498
														At3g22710	8026209	8027281	Complement	MWI23.8	F-box family protein	-1.51218	-2.59578	6.39796	-0.878043	-3.84035	2.10916	6.39796
														At3g21540	7585952	7590862	Complement	MIL23.11	transducin family protein /WD-40 repeat family protein	-1.672	-1.69109	6.36116	-1.92946	-3.0217	3.23296	6.36116
														At1g13600	4650784	4651466	Complement	F13B4.8	bZIP transcription factor familyprotein	-1.95473	-1.95111	6.35836	-1.0938	-3.62547	2.72094	6.35836
														At1g74300	27938959	27940650	sense	F1O17.3	esterase/lipase/thioesterasefamily protein	-2.00517	0.312277	6.3498	-3.90167	-1.43835	5.61684	6.3498
														At3g52300	19407543	19409355	sense	T25B15.70	ATP synthase D chain-related	-0.909916	-1.04797	6.34729	-3.25964	-1.72363	3.71099	6.34729
														At1g13890	4751578	4752841	sense	F16A14.10	SNAP25 homologous proteinputative / synaptosomal-associated protein SNAP25-likeputative (SNAP30)	-1.60114	-1.50469	6.34401	-1.67851	-2.83307	2.98773	6.34401
														At2g40990	17112175	17114258	Complement	T3K9.24	zinc finger (DHHC type) familyprotein	-1.70174	-1.53658	6.33931	-1.90444	-2.91701	3.25492	6.33931
														At5g50260	20472543	20474255	sense	K6A12.12	cysteine proteinase putative	-3.06271	-2.34028	6.31163	0.207688	-5.34375	2.40306	6.31163
														At1g21010	7346145	7346957	sense	F9H16.19	expressed protein	0.5232	-1.20816	6.31137	-5.17016	-0.593252	3.6245	6.31137
														At5g39310	15756508	15757742	Complement	K3K3.160	expansin putative (EXP24)	-1.61137	-1.68066	6.31078	-1.80243	-2.97355	3.06429	6.31078
														At2g13620	5685088	5687703	sense	T10F5.16	cation/hydrogen exchangerputative (CHX15)	-1.50028	-1.452	6.28775	-1.9902	-2.65789	3.15571	6.28775
														At4g14810	8504140	8504504	sense	FCAALL.327	hypothetical protein	-1.51574	-1.69478	6.26366	-1.85711	-2.89593	3.03097	6.26366
														At1g65240	24234530	24237012	Complement	T23K8.15	aspartyl protease familyprotein	-1.9039	-2.23396	6.26041	-0.67334	-3.93632	2.27301	6.26041
														At1g67480	25279958	25282381	sense	T1F15.5	kelch repeat-containing F-boxfamily protein	-2.08598	-1.2175	6.25848	-1.83751	-2.96301	3.57223	6.25848
														At5g26150	9137464	9140102	Complement	T1N24.15	protein kinase family protein	-1.46518	-1.73193	6.25269	-1.82083	-2.88605	2.94142	6.25269
														At1g64300	23866758	23869708	sense	F15H21.13	protein kinase family protein	-1.71885	-1.05044	6.24607	-2.23014	-2.46928	3.62571	6.24607
														At5g45880	18626891	18628393	Complement	K15I22.8	pollen Ole e 1 allergen andextensin family protein	-2.64681	-2.72416	6.24241	0.0327069	-5.13112	2.23973	6.24241
														At2g40620	16961619	16964056	Complement	T2P4.3	bZIP transcription factor familyprotein	-2.93468	-1.76568	6.22842	-0.213802	-4.55547	2.71179	6.22842
														At2g33870	14344442	14345330	Complement	T1B8.16	Ras-related GTP-binding proteinputative	-1.52994	-1.66511	6.21758	-1.76746	-2.88968	2.96194	6.21758
														At5g60740	24443298	24447495	Complement	MUP24.11	ABC transporter family protein	-1.45006	-1.51064	6.20322	-1.82578	-2.68031	2.96602	6.20322
														At3g29020	11009851	11010650	Complement	K5K13.6	myb family transcription factor(MYB110)	-1.35219	-1.25645	6.19304	-2.02218	-2.35034	3.08583	6.19304
														At4g25420	12990894	12992449	Complement	T30C3.90	gibberellin 20-oxidase	-2.17265	-0.504735	6.17015	-2.24339	-2.34664	4.17698	6.17015
														At1g22130	7812376	7814248	Complement	F2E2.20	MADS-box family protein	-1.11822	-1.68546	6.13565	-1.80842	-2.5353	2.62162	6.13565
														At4g20870	11174597	11175889	Complement	T13K14.30	fatty acid hydroxylaseputative	-4.54262	-0.650449	6.11079	-0.268706	-4.57522	4.10704	6.11079
														At3g04620	1255532	1256857	Complement	F7O18.10	expressed protein	-1.6695	-1.92336	6.1072	-1.20003	-3.31539	2.5646	6.1072
														At4g10010	6263594	6266242	Complement	T5L19.140	protein kinase family protein	-1.43875	-1.63799	6.10691	-1.83353	-2.77468	2.93914	6.10691
														At5g61360	24688240	24689464	sense	MFB13.14	expressed protein	-1.5692	-1.57672	6.08664	-1.87075	-2.82757	3.08857	6.08664
														At2g24370	10377059	10380143	Complement	T28I24.10	protein kinase family protein	-1.58159	-1.59681	6.08103	-1.84549	-2.85766	3.07528	6.08103
														At1g77980	29320106	29321961	Complement	F28K19.20	MADS-box family protein	-1.26972	-1.41817	6.06046	-2.17895	-2.40395	3.10268	6.06046
														At3g57450	21272911	21273599	sense	T8H10.50	expressed protein	-0.200968	-1.9503	6.05128	-2.84383	-1.87335	2.5956	6.05128
														At4g30860	15024478	15027622	sense	T10C21.2	SET domain-containing protein	-2.14775	-2.42963	6.05016	-0.385707	-4.34703	2.20658	6.05016
														At3g05140	1435704	1438347	Complement	T12H1.10	protein kinase family protein	-1.47412	-1.46802	6.04725	-1.79352	-2.65993	2.95696	6.04725
														At4g13450	7814956	7815900	Complement	T9E8.190	universal stress protein (USP)family protein	-1.73738	-1.26365	6.01798	-1.79765	-2.70273	3.21649	6.01798
														At1g74490	27998361	28000392	Complement	F1M20.17	protein kinase putative	-2.04476	-1.96408	6.01733	-0.870752	-3.72608	2.58319	6.01733
														At4g34440	16465832	16468960	sense	F10M10.3	protein kinase family protein	-1.61653	-1.5534	6.01597	-1.81431	-2.8491	3.07647	6.01597
														At3g22700	8024805	8025821	Complement	MWI23.7	F-box family protein	-0.720631	-1.98132	6.01177	-2.30921	-2.38918	2.65637	6.01177
														At1g11990	4046244	4049058	Complement	F12F1.14	expressed protein	-1.52582	-1.42915	6.01154	-1.90273	-2.65663	3.09532	6.01154
														At5g25430	8851254	8854262	sense	F18G18.170	anion exchange protein family	-1.53636	-1.50532	6.00754	-1.68687	-2.75494	2.90821	6.00754
														At4g34510	16491801	16493423	sense	T4L20.90	fatty acid elongase putative	-1.7511	-1.57387	6.00683	-1.53094	-3.017	2.95004	6.00683
														At1g03620	904318	906012	Complement	F21B7.23	phagocytosis and cell motilityprotein ELMO1-related	-1.2728	-0.951677	6.00449	-2.47519	-1.97413	3.421	6.00449
														At1g07330	2251130	2253584	sense	F22G5.33	hypothetical protein	-1.34246	-1.83944	5.97896	-1.68948	-2.87128	2.70044	5.97896
														At3g57470	21280238	21286904	Complement	T8H10.70	peptidase M16 family protein /insulinase family protein	-0.536527	-2.4082	5.95687	-1.91188	-2.59862	2.13162	5.95687
														At1g05100	1469609	1470880	sense	T7A14.2	protein kinase family protein	0.0399473	-1.30432	5.94648	-4.05527	-1.09793	3.33738	5.94648
														At3g59260	21914816	21916165	sense	F25L23.120	pirin putative	-1.42223	-1.58104	5.94167	-1.93688	-2.69068	3.00576	5.94167
														At3g11820	3729311	3731139	Complement	F26K24.11	syntaxin 121 (SYP121) /syntaxin-related protein (SYR1)	-1.27291	-1.76353	5.94137	-1.6922	-2.74445	2.64766	5.94137
														At3g55700	20682094	20684351	sense	F1I16.110	UDP-glucoronosyl/UDP-glucosyltransferase family protein	-2.6265	0.345437	5.93765	-2.87287	-1.91443	5.32688	5.93765
														At5g08250	2653581	2655727	Complement	T22D6.190	cytochrome P450 family protein	-1.70965	-1.82111	5.91293	-1.23891	-3.23327	2.62874	5.91293
														At3g21810	7684437	7688623	sense	MSD21.12	zinc finger (CCCH-type) familyprotein	-1.43544	-1.36076	5.90468	-1.73095	-2.52812	2.86612	5.90468
														At5g20690	7002455	7004553	sense	T1M15.90	leucine-rich repeattransmembrane protein kinase putative	-1.63805	-1.43607	5.89785	-1.69303	-2.77375	3.00187	5.89785
														At1g11250	3768724	3769706	sense	T28P6.10	syntaxin putative (SYP125)	-1.57147	-1.40156	5.87874	-1.90884	-2.66302	3.13083	5.87874
														At2g13570	5662924	5663571	Complement	T10F5.11	CCAAT-box binding transcriptionfactor putative	0.702163	-2.26934	5.86884	-3.44299	-1.31422	2.15903	5.86884
														At4g27880	13883229	13885058	sense	T27E11.120	seven in absentia (SINA)family protein	-1.88074	-1.16223	5.86576	-1.59238	-2.74737	3.16846	5.86576
														At1g69050	25965587	25966011	sense	F4N2.3	expressed protein	-1.95698	-1.11507	5.83371	-1.83261	-2.74062	3.43347	5.83371
														At2g41970	17527595	17529722	Complement	T6D20.14	protein kinase putative	-1.33657	-1.48894	5.8293	-1.76306	-2.55075	2.79193	5.8293
														At2g19500	8451286	8454437	Complement	F3P11.10	FAD-binding domain-containingprotein / cytokinin oxidase family protein	-0.148434	-0.973444	5.82536	-3.82796	-0.977918	3.32494	5.82536
														At5g56160	22749712	22752765	sense	MDA7.22	SEC14 cytosolic factor familyprotein / phosphoglyceride transfer family protein	-1.65595	-1.44776	5.79853	-1.63997	-2.79928	2.96427	5.79853
														At4g08590	5463892	5466653	Complement	T15F16.7	zinc finger (C3HC4-type RINGfinger) family protein	-2.15248	-2.45391	5.77018	-0.0672362	-4.48519	1.90942	5.77018
														At3g24506	8928177	8929336	Complement	MOB24.5	expressed protein	-1.54554	-1.00945	5.74428	-2.25351	-2.26496	3.44106	5.74428
														At5g45820	18604308	18605627	Complement	MRA19.12	CBL-interacting protein kinase20 (CIPK20)	-0.0484373	-1.97784	5.74078	-2.79175	-1.75768	2.39262	5.74078
														At3g42836	14943427	14946105	Complement	T21C14.14	gypsy-like retrotransposonfamilyhas a 3.5e-21 P-value blast match to MVA11 reversetranscriptase (from Dan Voytashttp://www.public.iastate.edu/voytas) (Gypsy_Ty3-family)	-1.45796	-1.52028	5.74077	-1.8656	-2.66438	2.96779	5.74077
														At2g24320	10352739	10353909	Complement	T28I24.5	hypothetical protein	-1.29856	-1.3527	5.73455	-1.88542	-2.38152	2.86815	5.73455
														At5g36260	14302185	14305563	Complement	T30G6.12	aspartyl protease familyprotein	-1.33183	-1.37316	5.72238	-1.90946	-2.427	2.92141	5.72238
														At3g05820	1732997	1735632	Complement	F10A16.11	beta-fructofuranosidaseputative / invertase putative / saccharase putative /beta-fructosidase putative	-1.23164	-1.49259	5.70608	-1.9568	-2.43823	2.85673	5.70608
														At4g24580	12687889	12694258	Complement	F22K18.220	pleckstrin homology (PH)domain-containing protein-related / RhoGAPdomain-containing protein	-1.58023	-1.27074	5.69342	-1.76199	-2.56225	3.02361	5.69342
														At3g19940	6938217	6939981	sense	MPN9.18	sugar transporter putative	0.307114	-1.27632	5.68214	-4.20404	-0.838437	3.15447	5.68214
														At4g13240	7680149	7682410	sense	F17N18.130	hypothetical protein	-1.55344	-1.43646	5.67374	-1.75118	-2.68165	2.95983	5.67374
														At4g20160	10890993	10894981	sense	F1C12.80	expressed protein	-1.36406	-1.54177	5.67258	-1.8125	-2.60511	2.83725	5.67258
														At3g60980	22576284	22577720	Complement	T27I15.70	pentatricopeptide (PPR)repeat-containing protein	0.0288628	-0.370616	5.67249	-5.03278	-0.297689	3.9975	5.67249
														At1g05960	1807972	1815463	Complement	T21E18.21	expressed protein	-2.04913	-0.828069	5.6637	-1.69807	-2.56325	3.45325	5.6637
														At3g12590	3995729	4003664	Complement	T2E22.10	expressed protein	-0.872487	-0.334657	5.66099	-3.81709	-1.04886	4.17445	5.66099
														At3g16350	5547724	5549666	sense	T2O4.10	myb family transcription factor	-1.58082	-1.42002	5.64083	-1.50861	-2.72063	2.7869	5.64083
														At1g67810	25430151	25430968	sense	F12A21.6	Fe-S metabolism associateddomain-containing protein	2.39251	-3.27329	5.61184	-4.45819	-0.679776	1.4238	5.61184
														At1g19640	6788876	6791837	Complement	F14P1.3	S-adenosyl-L-methionine:jasmonicacid carboxyl methyltransferase (JMT)	1.31298	-2.41735	5.60158	-4.07011	-0.911565	2.0984	5.60158
														At3g08700	2643488	2644551	sense	F17O14.17	ubiquitin-conjugating enzymeputative	0.285036	-1.49307	5.59762	-3.67142	-1.03959	2.74518	5.59762
														At5g53250	21620846	21621457	sense	K19E1.5	arabinogalactan-protein putative(AGP22)	-2.09922	-1.29804	5.59387	-1.28892	-3.06938	3.04283	5.59387
														At1g43630	16438811	16440067	Complement	T10P12.8	expressed protein	-1.25636	-1.50582	5.58568	-1.87795	-2.47091	2.79214	5.58568
														At5g43180	17353566	17355080	Complement	MMG4.1	expressed protein	0.407443	-1.0006	5.56762	-4.62549	-0.515463	3.32655	5.56762
														At3g57920	21455298	21456952	Complement	T10K17.130	squamosa promoter-bindingprotein putative	-1.10981	-2.71605	5.55506	-0.977863	-3.45016	1.82391	5.55506
														At1g09600	3108619	3111320	sense	F14J9.26	protein kinase family protein	-2.03871	-1.75648	5.54729	-0.721031	-3.53282	2.43787	5.54729
														At2g32510	13805898	13807016	Complement	T26B15.7	protein kinase family protein	-1.73637	-0.752362	5.54685	-2.18791	-2.19547	3.59478	5.54685
														At4g26650	13444944	13448218	sense	T15N24.100	RNA recognition motif(RRM)-containing protein	-1.71356	-1.64659	5.53818	-1.27282	-3.04769	2.65761	5.53818
														At2g39420	16467442	16470111	sense	F12L6.8	esterase/lipase/thioesterasefamily protein	-0.181493	-1.9312	5.53784	-2.70677	-1.83917	2.46252	5.53784
														At3g54660	20240723	20244160	Complement	T5N23.20	gluthatione reductasechloroplast	-4.09894	-0.270278	5.53625	-0.614451	-3.73195	4.15203	5.53625
														At5g10090	3153723	3155746	Complement	T31P16.80	tetratricopeptide repeat(TPR)-containing protein	-1.43956	-1.37035	5.52059	-1.67393	-2.52905	2.79984	5.52059
														At1g21140	7404372	7405270	sense	T22I11.3	nodulin putative	0.114002	-1.43619	5.5199	-3.60494	-1.14637	2.89258	5.5199
														At3g44520	16121387	16122126	Complement	F14L2.70	esterase/lipase/thioesterasefamily protein	-0.358654	-1.94581	5.50933	-2.32378	-2.01955	2.30893	5.50933
														At3g27160	10018713	10020327	sense	MYF5.3	ribosomal protein S21 familyprotein	-1.25779	-1.65205	5.50577	-0.923354	-2.72261	1.94879	5.50577
														At4g13235	7677520	7678243	Complement	F17N18.120	hypothetical protein	-1.36405	-1.12945	5.5043	-1.7017	-2.2506	2.80487	5.5043
														At3g52590	19516614	19517910	sense	F22O6.30	ubiquitin extension protein 1(UBQ1) / 60S ribosomal protein L40 (RPL40B)	-1.22156	-1.68242	5.48544	-1.75036	-2.59675	2.63953	5.48544
														At1g63060	23387708	23388703	sense	F16M19.2	expressed protein	-1.40891	-1.32326	5.48465	-1.79232	-2.44881	2.88184	5.48465
														At1g10740	3568171	3570761	Complement	F20B24.17	expressed protein	-2.29863	0.522803	5.46865	-3.10521	-1.48322	5.21041	5.46865
														At1g31750	11370640	11372058	Complement	F27M3.1	proline-rich family protein	-0.106585	-1.32693	5.42879	-3.27931	-1.24769	2.8527	5.42879
														At2g19400	8406239	8409682	Complement	F27F23.20	protein kinase putative	-0.848989	-1.63054	5.41406	-1.87939	-2.21399	2.4175	5.41406
														At4g18790	10317796	10319671	Complement	F28A21.200	NRAMP metal ion transporter 5putative (NRAMP5)	-1.40879	-1.38901	5.41048	-1.81458	-2.49714	2.87876	5.41048
														At3g56930	21084474	21087293	sense	F24I3.10	zinc finger (DHHC type) familyprotein	-2.02464	-1.6699	5.38542	-0.774963	-3.40918	2.47383	5.38542
														At1g51210	18991477	18992778	sense	F11M15.8	UDP-glucoronosyl/UDP-glucosyltransferase family protein	-1.14146	-1.4303	5.38444	-2.06596	-2.28276	2.84359	5.38444
														At1g01780	282919	284082	sense	T1N6.19	LIM domain-containing protein	-0.99431	-0.385055	5.36575	-3.12656	-1.20279	3.76627	5.36575
														At5g10260	3220064	3221516	sense	F18D22.30	Ras-related GTP-bindingprotein putative	-1.79386	-1.27786	5.34529	-1.32663	-2.77987	2.81155	5.34529
														At1g73480	27632600	27636467	sense	T9L24.33	hydrolase alpha/beta foldfamily protein	2.0652	-3.17066	5.33629	-3.87665	-0.844031	1.27295	5.33629
														At4g28720	14192589	14194262	sense	F16A16.170	flavin-containingmonooxygenase family protein / FMO family protein	-2.57092	0.559645	5.33279	-2.76917	-1.66972	5.15044	5.33279
														At1g03457	860788	864048	Complement	F21B7.8	RNA-binding protein putative	-2.41012	-1.45247	5.32313	-0.641959	-3.55221	2.68794	5.32313
														At2g20320	8774187	8779217	sense	F11A3.13	DENN (AEX-3) domain-containingprotein	-0.160732	-2.09515	5.31266	-2.3776	-1.95899	2.17143	5.31266
														At4g32630	15738321	15741104	sense	F4D11.170	hypothetical protein	-1.16146	-1.31959	5.31202	-1.86534	-2.21859	2.71196	5.31202
														At4g14780	8492827	8494586	sense	FCAALL.308	protein kinase putative	-1.09768	-1.31149	5.30715	-1.85494	-2.15726	2.65046	5.30715
														At5g60010	24177682	24181631	sense	MMN10.18	ferric reductase-liketransmembrane component family protein	-1.43125	-1.06727	5.30231	-1.92854	-2.22421	3.03396	5.30231
														At3g60300	22296306	22298454	sense	F27H5.90	RWD domain-containing protein	-1.16205	-1.58722	5.27971	-1.61687	-2.46885	2.47005	5.27971
														At4g39670	18410166	18410994	sense	F23K16.2	expressed protein	2.55267	-3.01003	5.25998	-4.69134	-0.364608	1.46564	5.25998
														At2g20430	8815748	8816835	Complement	F11A3.2	p21-rho-binding domain-containingprotein	-1.29398	-1.16478	5.25648	-1.85042	-2.19705	2.83456	5.25648
														At1g64630	24023153	24026490	sense	F1N19.20	protein kinase family protein	-1.76737	-1.2919	5.24653	-1.41376	-2.74733	2.85071	5.24653
														At5g01610	231042	232198	sense	F7A7.130	expressed protein	-0.613969	-0.235442	5.23737	-4.02361	-0.736554	4.04121	5.23737
														At3g55020	20399846	20405888	Complement	T15C9.20	RabGAP/TBC domain-containingprotein	-1.39542	-0.480549	5.19007	-2.382	-1.6427	3.49294	5.19007
														At5g62750	25220675	25221343	Complement	MQB2.7	expressed protein	-1.52785	-1.49442	5.15572	-1.5299	-2.69457	2.71359	5.15572
														At1g16370	5596688	5598441	sense	F3O9.17	transporter-related	-2.24433	0.599677	5.14878	-2.98214	-1.36545	5.06167	5.14878
														At2g48150	19695032	19696243	Complement	F11L15.5	glutathione peroxidaseputative	-1.05183	-1.40404	5.13944	-1.76551	-2.19695	2.51488	5.13944
														At1g26840	9298809	9300590	sense	T2P11.3	origin recognition complexsubunit 6 family protein (ORC6)	-1.77491	-1.60261	5.13176	-0.991635	-3.07242	2.45255	5.13176
														At3g56310	20893782	20897302	sense	F18O21.270	alpha-galactosidase putative/ melibiase putative / alpha-D-galactosidegalactohydrolase putative	-0.912551	-1.31974	5.10525	-1.85747	-1.99389	2.46965	5.10525
														At2g46260	19003041	19005706	sense	T3F17.9	BTB/POZ domain-containingprotein	-2.25548	-0.185418	5.10338	-1.99525	-2.10534	3.96131	5.10338
														At1g01070	38753	40944	Complement	T25K16.7	nodulin MtN21 family protein	0.539356	-0.717853	5.10259	-4.85396	-0.157686	3.31727	5.10259
														At5g24940	8591410	8593604	Complement	F6A4.150	protein phosphatase 2C putative/ PP2C putative	-1.50802	-1.329	5.10169	-1.5797	-2.5333	2.75276	5.10169
														At1g16760	5734227	5737300	sense	F17F16.3	protein kinase family protein	-1.42529	-1.24216	5.10067	-1.65615	-2.38356	2.75692	5.10067
														At1g74010	27835819	27837774	Complement	F2P9.12	strictosidine synthase familyprotein	1.66072	-3.47909	5.08076	-2.90798	-1.40213	0.948694	5.08076
														At1g15430	5304312	5306007	sense	T16N11.19	expressed protein	-0.0776326	-0.630826	5.07809	-4.01017	-0.617315	3.39633	5.07809
														At1g16360	5593487	5595173	Complement	F3O9.16	LEM3 (ligand-effect modulator 3)family protein / CDC50 family protein	-1.37445	-0.936407	5.07618	-1.90217	-2.0534	2.96585	5.07618
														At4g20380	11004528	11006796	sense	F9F13.30	zinc finger protein (LSD1)	-0.689646	-1.31006	5.07392	-2.33422	-1.76347	2.65195	5.07392
														At2g29050	12485223	12487449	sense	T9I4.13	rhomboid family protein	-3.2926	-1.5378	5.07123	0.332046	-4.58545	2.45398	5.07123
														At5g24880	8552746	8554077	sense	F6A4.90	expressed protein	-1.16396	-1.40519	5.05772	-1.87385	-2.27848	2.68701	5.05772
														At2g31940	13587677	13588189	sense	F20M17.26	expressed protein	-1.67534	-0.8065	5.05478	-1.82498	-2.19539	3.17296	5.05478
														At1g63930	23731590	23732837	sense	T12P18.5	expressed protein	-1.39133	-1.22291	5.05476	-1.75797	-2.3257	2.80794	5.05476
														At3g59800	22105454	22107151	Complement	F24G16.70	expressed protein	-1.39848	-1.37091	5.05047	-1.37783	-2.50322	2.49522	5.05047
														At4g00110	38504	40189	Complement	F6N15.16	NAD-dependentepimerase/dehydratase family protein	-1.66254	-1.90938	5.04601	-0.760986	-3.26726	2.12936	5.04601
														At2g33670	14252106	14255007	sense	F4P9.44	seven transmembrane MLO familyprotein / MLO-like protein 5 (MLO5)	-1.41919	-1.04561	5.04544	-1.72655	-2.19852	2.83434	5.04544
														At1g78090	29378784	29381397	sense	T11I11.2	trehalose-6-phosphatephosphatase (TPPB)	-3.33302	-1.36151	5.03449	0.16961	-4.3551	2.65822	5.03449
														At1g51490	19098556	19101120	sense	F5D21.16	glycosyl hydrolase family 1protein	-1.32142	-1.40086	5.02891	-1.59417	-2.43279	2.59221	5.02891
														At2g44480	18366810	18370164	sense	F4I1.29	glycosyl hydrolase family 1protein	-2.02487	-0.980929	5.01387	-1.29444	-2.68542	2.98565	5.01387
														At2g03840	1173167	1174112	sense	T18C20.4	senescence-associated familyprotein	-1.24041	-1.09526	5.00501	-1.97506	-2.07023	2.87211	5.00501
														At5g61980	24911698	24916404	sense	K22G18.9	ARF GTPase-activatingdomain-containing protein	-1.6619	-1.58116	5.00269	-1.08716	-2.92889	2.43139	5.00269
														At1g10660	3532429	3535132	sense	F20B24.10	expressed protein	-1.18665	-1.82591	4.97721	-1.13245	-2.73234	2.05226	4.97721
														At3g22620	8008541	8010024	sense	F16J14.17	protease inhibitor/seedstorage/lipid transfer protein (LTP) family protein	-1.16004	-1.29344	4.97572	-1.7661	-2.18654	2.60291	4.97572
														At4g30770	14986146	14986619	Complement	T10C21.120	hypothetical protein	-1.10796	-1.41818	4.96977	-1.71445	-2.25215	2.50112	4.96977
														At4g13230	7675659	7676676	Complement	F17N18.16	late embryogenesis abundantdomain-containing protein / LEA domain-containing protein	-1.04965	-1.38202	4.96462	-1.78445	-2.16568	2.51403	4.96462
														At1g19780	6833876	6836396	Complement	F6F9.17	cyclic nucleotide-regulated ionchannel putative (CNGC8)	-1.34499	-1.1277	4.94326	-1.69319	-2.20545	2.72216	4.94326
														At4g12530	7428024	7428560	Complement	T1P17.120	protease inhibitor/seedstorage/lipid transfer protein (LTP) family protein	-1.2716	-0.847876	4.93159	-2.16545	-1.86793	3.08117	4.93159
														At3g27380	10132197	10133997	Complement	K1G2.19	succinate dehydrogenaseiron-sulphur subunit mitochondrial (SDH2-1)	-1.14162	-1.54373	4.908	-1.34549	-2.42367	2.20938	4.908
														At1g15470	5315502	5317858	sense	T16N11.22	transducin family protein /WD-40 repeat family protein	-0.992841	-2.24263	4.88237	-0.923414	-2.92457	1.67482	4.88237
														At1g24110	8527827	8528807	sense	F3I6.3	peroxidase putative	-1.34216	-1.40915	4.87862	-1.54963	-2.44977	2.55982	4.87862
														At3g46720	17221840	17223333	Complement	T6H20.250	UDP-glucoronosyl/UDP-glucosyltransferase family protein	-1.17727	-1.47518	4.87633	-1.49704	-2.37499	2.36919	4.87633
														At3g06150	1861803	1864122	Complement	F28L1.9	expressed protein	-3.13534	-0.550129	4.86911	-0.755835	-3.2265	3.44116	4.86911
														At2g19880	8588451	8592560	sense	F6F22.9	ceramide glucosyltransferaseputative	-1.76589	0.315929	4.85611	-2.889	-1.22489	4.41411	4.85611
														At1g62450	23119623	23121035	Complement	T3P18.2	Rho GDP-dissociation inhibitorfamily protein	-1.38541	-1.27311	4.84385	-1.43986	-2.38474	2.52603	4.84385
														At1g74780	28099476	28101845	sense	F25A4.25	nodulin family protein	-1.75017	-0.968596	4.82496	-1.46733	-2.41844	2.88926	4.82496
														At1g47380	17374977	17378515	Complement	T3F24.2	protein phosphatase 2C-related /PP2C-related	-2.2322	-1.37793	4.80734	-0.40565	-3.36304	2.30575	4.80734
														At1g04880	1375960	1379175	Complement	F13M7.13	high mobility group (HMG1/2)family protein / ARID/BRIGHT DNA-binding domain-containingprotein	-1.44899	-1.04924	4.80266	-1.64034	-2.22192	2.76688	4.80266
														At3g27170	10025254	10028435	sense	MYF5.4	chloride channel protein (CLC-b)	-1.48902	-2.91056	4.79858	0.0471608	-4.04723	1.24433	4.79858
														At1g23540	8346931	8349775	Complement	F5O8.10	protein kinase family protein	-1.08158	-1.24266	4.79824	-1.8047	-2.06472	2.56338	4.79824
														At5g66740	26664956	26665784	sense	MSN2.13	hypothetical protein	-1.3221	-1.36459	4.77523	-1.53775	-2.39007	2.53049	4.77523
														At5g20810	7044100	7045713	sense	T1M15.210	auxin-responsive proteinputative / small auxin up RNA (SAUR_B)	-1.16539	-1.12049	4.76202	-1.95173	-2.0184	2.76168	4.76202
														At4g40010	18548698	18551050	Complement	T5J17.180	serine/threonine proteinkinase putative	-1.78559	0.231988	4.75224	-2.73559	-1.32048	4.22985	4.75224
														At5g15240	4947670	4950343	sense	F8M21.130	amino acid transporter familyprotein	-0.947633	-1.32109	4.74517	-1.89544	-2.00791	2.50348	4.74517
														At5g51460	20918203	20921765	sense	MFG13.17	trehalose-6-phosphatephosphatase (TPPA)	-2.33235	0.486626	4.74046	-2.36678	-1.52798	4.5659	4.74046
														At4g32180	15537604	15543785	Complement	F10M6.180	eukaryotic pantothenate kinasefamily protein	-0.728984	-0.440717	4.73954	-2.801	-1.02206	3.16785	4.73954
														At1g53320	19894682	19897159	Complement	F12M16.22	F-box family protein / tubbyfamily protein (TULP7)	-1.5361	-0.727735	4.73745	-1.87966	-1.99345	3.07895	4.73745
														At3g05990	1796871	1799876	Complement	F2O10.5	leucine-rich repeat familyprotein	-2.45317	-0.0506415	4.73442	-1.63077	-2.13779	3.82156	4.73442
														At3g51740	19200028	19203028	sense	T18N14.120	leucine-rich repeattransmembrane protein kinase putative	-0.803905	-0.820353	4.71986	-2.48696	-1.42648	2.91136	4.71986
														At2g34770	14672746	14675329	sense	T29F13.2	fatty acid hydroxylase (FAH1)	-2.17321	0.00749952	4.67661	-2.00842	-1.85178	3.88755	4.67661
														At3g10420	3239185	3242542	sense	F13M14.30	sporulation protein-related	-1.23399	-1.11144	4.67309	-1.70754	-2.08285	2.61943	4.67309
														At4g20890	11182103	11184083	sense	T13K14.50	tubulin beta-9 chain (TUB9)	-3.15276	-0.65273	4.65102	-0.486721	-3.35035	3.17695	4.65102
														At4g17690	9846140	9847120	sense	FCAALL.96	peroxidase putative	-1.30281	-1.02243	4.64869	-1.79532	-2.05566	2.75573	4.64869
														At1g50290	18631227	18632102	Complement	F14I3.24	expressed protein	-0.807263	-0.249357	4.62012	-3.08992	-0.917263	3.4827	4.62012
														At2g01940	432669	435008	sense	F14H20.1	zinc finger (C2H2 type) familyprotein	-2.6454	0.487462	4.61786	-2.0944	-1.79542	4.45178	4.61786
														At1g79640	29971806	29975983	Complement	F20B17.7	protein kinase family protein	-1.12017	-1.18487	4.61687	-1.52097	-2.06435	2.36288	4.61687
														At4g09950	6234759	6236309	sense	T5L19.80	avirulence-responsive familyprotein / avirulence induced gene (AIG1) family protein	-1.51759	-0.495236	4.58984	-2.06401	-1.75925	3.24491	4.58984
														At2g19110	8285965	8293527	sense	T20K24.12	ATPase E1-E2 type familyprotein / haloacid dehalogenase-like hydrolase familyprotein / heavy-metal-associated domain-containingprotein	-0.677272	0.369045	4.58555	-4.218	-0.26195	4.2771	4.58555
														At3g07800	2489393	2491017	Complement	F17A17.14	thymidine kinase putative	-1.40064	-1.24268	4.58502	-1.41366	-2.35324	2.4959	4.58502
														At4g10510	6495951	6499006	sense	F7L13.90	subtilase family protein	-1.30562	-1.10745	4.58227	-1.51011	-2.15196	2.51199	4.58227
														At1g06540	2002876	2003392	Complement	F12K11.13	expressed protein	-1.67503	-1.4547	4.58191	-0.89716	-2.82452	2.27039	4.58191
														At3g13870	4565419	4571267	Complement	MCP4.11	root hair defective 3 (RHD3)	-1.35795	-1.36757	4.55419	-1.25881	-2.43922	2.31387	4.55419
														At3g59290	21922578	21928821	sense	F25L23.150	epsin N-terminal homology(ENTH) domain-containing protein	-1.18905	0.278707	4.55173	-3.34505	-0.776742	4.13063	4.55173
														At1g03920	1001320	1004382	sense	F21M11.15	protein kinase putative	-1.39138	-1.50896	4.54409	-1.18674	-2.58604	2.27113	4.54409
														At2g22800	9711796	9713230	Complement	T30L20.6	homeobox-leucine zipper protein9 (HAT9) / HD-ZIP protein 9	0.643758	-0.970239	4.5408	-4.12343	-0.285638	2.74608	4.5408
														At5g58380	23614188	23616468	Complement	MCK7.25	CBL-interacting protein kinase 10(CIPK10)	-0.317202	-1.5648	4.50842	-2.17776	-1.64487	2.14621	4.50842
														At1g79400	29869885	29872733	sense	T8K14.18	cation/proton exchangerputative (CHX2)	-1.27977	-1.33531	4.49679	-1.40466	-2.32465	2.36878	4.49679
														At5g53820	21870623	21871343	sense	MGN6.21	expressed protein	-0.16912	-0.517782	4.48626	-3.60877	-0.597274	3.20651	4.48626
														At2g03060	901613	903568	sense	T17M13.23	MADS-box family protein	-1.46082	-0.0513909	4.47938	-2.49905	-1.30087	3.63838	4.47938
														At1g06970	2138108	2140817	sense	F10K1.31	cation/hydrogen exchangerputative (CHX14)	-1.04215	-1.24789	4.47523	-1.67663	-2.0287	2.39684	4.47523
														At3g53470	19833722	19834471	sense	F4P12.170	expressed protein	-2.11061	-1.20451	4.47178	-0.670299	-2.98678	2.44448	4.47178
														At3g11390	3569834	3571966	sense	F24K9.5	DC1 domain-containing protein	-1.55478	-0.828835	4.46854	-1.5394	-2.10894	2.77562	4.46854
														At4g01470	625092	625850	Complement	F11O4.1	major intrinsic family protein /MIP family protein	-1.55053	-1.16821	4.44587	-1.21345	-2.4264	2.45259	4.44587
														At2g40090	16744544	16747448	Complement	F27I1.1	ABC1 family protein	-1.57574	-0.788228	4.43481	-1.5527	-2.08795	2.80637	4.43481
														At4g12430	7365330	7368727	Complement	T1P17.20	trehalose-6-phosphatephosphatase putative	-1.58391	-0.971422	4.41975	-1.36467	-2.26812	2.62844	4.41975
														At5g57690	23389289	23391695	Complement	MRI1.5	diacylglycerol kinase putative	-1.28154	-1.41271	4.40281	-1.17386	-2.41225	2.17136	4.40281
														At4g31020	15108107	15110183	Complement	F6I18.70	expressed protein	-2.25829	-1.72044	4.40168	0.0819526	-3.72783	1.85915	4.40168
														At2g41210	17180491	17183885	sense	T3K9.2	phosphatidylinositol-4-phosphate5-kinase family protein	0.256152	-1.78877	4.38011	-2.44893	-1.31826	1.82402	4.38011
														At2g29410	12623652	12625064	sense	F16P2.21	zinc transporter putative	-0.887109	-1.06696	4.37304	-1.90255	-1.72485	2.45951	4.37304
														At3g28740	10789935	10791790	Complement	T19N8.17	cytochrome P450 family protein	-1.09054	-1.39418	4.33442	-1.37353	-2.20962	2.16693	4.33442
														At1g51260	19007044	19009309	Complement	F11M15.12	acyl-CoA:1-acylglycerol-3-phosphate acyltransferaseputative	-1.18402	-1.18606	4.30373	-1.44953	-2.1047	2.33121	4.30373
														At4g15650	8922630	8923663	sense	FCAALL.351	protein kinase-related	-1.46297	-1.26595	4.29674	-1.0999	-2.4381	2.26223	4.29674
														At1g14700	5058675	5061052	sense	F10B6.10	purple acid phosphataseputative	-2.07588	0.106083	4.29604	-1.93746	-1.67655	3.71033	4.29604
														At2g40180	16789600	16791225	sense	T7M7.17	protein phosphatase 2C putative/ PP2C putative	-1.05772	-0.967945	4.2931	-1.70745	-1.79356	2.4565	4.2931
														At2g20440	8817857	8820604	Complement	T13C7.3	RabGAP/TBC domain-containingprotein	-1.51105	-0.655379	4.27759	-1.63996	-1.90509	2.83283	4.27759
														At5g02100	413517	416222	sense	T7H20.150	oxysterol-binding familyprotein	0.550489	-2.4256	4.26518	-2.00502	-1.57337	1.19337	4.26518
														At3g18710	6434089	6435567	Complement	MVE11.7	U-box domain-containing protein	-1.80717	-2.19241	4.25854	0.101042	-3.67696	1.46738	4.25854
														At2g38910	16252292	16254561	Complement	T7F6.8	calcium-dependent protein kinaseputative / CDPK putative	-0.901973	-1.09946	4.24738	-1.64879	-1.77626	2.2591	4.24738
														At5g10500	3305332	3308110	sense	F12B17.150	kinase interacting familyprotein	-1.10193	-1.2823	4.23983	-1.35963	-2.12217	2.17094	4.23983
														At1g70170	26427581	26428985	sense	F20P5.11	matrixin family protein	-0.388493	-1.49646	4.23375	-1.96486	-1.65078	2.02848	4.23375
														At3g62700	23201243	23206738	Complement	F26K9.130	glutathione-conjugatetransporter putative	-1.10212	-1.10147	4.22802	-1.5364	-1.95377	2.33409	4.22802
														At1g04600	1262122	1272375	sense	T1G11.15	myosin putative	-0.493754	-1.7084	4.22482	-1.51171	-1.94156	1.73832	4.22482
														At1g72500	27298998	27302218	Complement	T10D10.3	inter-alpha-trypsin inhibitorheavy chain-related	-2.86613	-1.34576	4.22053	0.339098	-3.90987	2.11022	4.22053
														At1g33770	12242106	12244442	sense	F14M2.11	protein kinase family protein	-1.27217	-1.22738	4.19697	-1.29507	-2.21811	2.26201	4.19697
														At2g24580	10451869	10453321	Complement	F25P17.12	sarcosine oxidase familyprotein	1.00549	-2.42695	4.19593	-2.46768	-1.1633	1.15658	4.19593
														At1g63220	23452584	23454106	sense	F9N12.16	C2 domain-containing protein	-2.96058	-1.20653	4.19009	0.268253	-3.80329	2.26483	4.19009
														At5g48270	19581970	19582938	Complement	MIF21.16	hypothetical protein	-0.987576	-1.10461	4.17645	-1.5777	-1.85464	2.26794	4.17645
														At3g12130	3864158	3866596	Complement	T21B14.5	KH domain-containing protein /zinc finger (CCCH type) family protein	-1.40208	-0.875103	4.17532	-1.49103	-2.00973	2.56953	4.17532
														At1g50990	18906598	18908872	sense	F8A12.21	protein kinase-related	-1.24609	-0.896212	4.16925	-1.60916	-1.88992	2.53235	4.16925
														At3g12670	4020127	4024275	Complement	MBK21.10	CTP synthase putative /UTP--ammonia ligase putative	-1.5905	-0.970077	4.1622	-1.20702	-2.26877	2.47997	4.1622
														At5g14870	4808094	4810900	Complement	T9L3.170	cyclic nucleotide-regulated ionchannel putative (CNGC18)	-1.14028	-1.30928	4.16061	-1.24743	-2.18208	2.10546	4.16061
														At3g07930	2526624	2528639	sense	F17A17.27	HhH-GPD base excision DNArepair family protein	-1.33886	-1.26729	4.1579	-1.14675	-2.31911	2.19038	4.1579
														At5g02180	430880	433739	sense	T7H20.230	amino acid transporter familyprotein	0.198639	-1.989	4.15756	-1.93579	-1.53301	1.45543	4.15756
														At1g22200	7837588	7840748	Complement	F16L1.7	expressed protein	-1.94667	-1.4354	4.15646	-0.253982	-3.12624	1.91002	4.15646
														At2g18280	7953081	7955528	sense	T30D6.21	tubby-like protein 2 (TULP2)	-1.54588	-0.0257933	4.15013	-2.26353	-1.35218	3.45658	4.15013
														At3g02440	500811	502236	Complement	F16B3.7	expressed protein	-0.999058	-1.20154	4.14604	-1.50348	-1.9493	2.20319	4.14604
														At1g65840	24493447	24496687	sense	F1E22.18	amine oxidase family protein	-1.67633	0.113853	4.14361	-2.25004	-1.33557	3.60258	4.14361
														At2g47810	19589820	19590688	Complement	F17A22.20	histone-like transcriptionfactor (CBF/NF-Y) family protein	-2.06349	0.305073	4.13063	-2.05826	-1.48325	3.82021	4.13063
														At1g75780	28454802	28457301	Complement	T4O12.1	tubulin beta-1 chain (TUB1)	-3.57192	0.0561637	4.1192	-0.447039	-2.93309	3.50482	4.1192
														At1g16290	5570747	5573532	Complement	F3O9.9	expressed protein	-1.12595	-1.23206	4.11447	-1.26204	-2.10241	2.11185	4.11447
														At5g35390	13614148	13616206	sense	T26D22.9	leucine-rich repeattransmembrane protein kinase putative	-1.07282	-1.22171	4.11129	-1.34535	-2.04047	2.1319	4.11129
														At5g25530	8889668	8890957	Complement	T14C9.70	DNAJ heat shock proteinputative	-0.905798	-1.18196	4.09481	-1.50107	-1.85267	2.12373	4.09481
														At4g03110	1376306	1379402	Complement	T4I9.1	RNA-binding protein putative	-3.28947	0.523456	4.09292	-1.15487	-2.25608	4.05539	4.09292
														At5g57830	23446517	23448222	Complement	MTI20.7	expressed protein	-2.794	-0.193045	4.04712	-0.796238	-2.56866	3.18868	4.04712
														At4g21326	11346991	11349664	sense	T6K22.2	subtilase family protein	-1.38059	-1.21402	4.0396	-1.03761	-2.31393	2.12983	4.0396
														At2g04220	1445398	1446321	sense	T16B23.7	hypothetical protein	-0.972831	-1.00576	4.00654	-1.5956	-1.74857	2.26397	4.00654
														At4g24630	12714929	12717121	sense	F22K18.170	zinc finger (DHHC type) familyprotein	-1.40873	-0.784602	3.9937	-1.42848	-1.93262	2.52212	3.9937
														At1g15920	5469397	5471143	sense	T24D18.2	CCR4-NOT transcription complexprotein putative	-1.06087	-1.1604	3.99248	-1.41688	-1.96281	2.17881	3.99248
														At5g64690	25880195	25881994	sense	MUB3.22	neurofilament triplet Hprotein-related	-1.18246	-1.23957	3.97709	-1.15878	-2.15433	2.05875	3.97709
														At1g03070	730148	731379	sense	F10O3.11	expressed protein	-1.14902	-0.595889	3.96141	-1.72765	-1.53417	2.59011	3.96141
														At1g75450	28318582	28321793	Complement	F1B16.2	FAD-binding domain-containingprotein / cytokinin oxidase family protein	1.20031	-1.95816	3.95838	-3.06492	-0.639061	1.45646	3.95838
														At5g59490	23999977	24001645	Complement	F2O15.11	haloacid dehalogenase-likehydrolase family protein	0.391368	-1.58725	3.95396	-2.49789	-1.02697	1.74234	3.95396
														At5g58190	23563555	23566831	sense	MCK7.6	expressed protein	-1.43319	-1.39393	3.93742	-0.54484	-2.59256	1.73701	3.93742
														At2g33320	14126603	14129171	Complement	F4P9.9	C2 domain-containing protein	-1.12993	-1.12098	3.93457	-1.32748	-1.99162	2.16342	3.93457
														At5g61340	24679230	24680343	Complement	MFB13.11	expressed protein	-1.43526	-1.59947	3.93207	-0.48598	-2.75163	1.67517	3.93207
														At5g58670	23721457	23724026	Complement	MZN1.12	phosphoinositide-specificphospholipase C (PLC1)	0.619819	-2.35784	3.92509	-1.91435	-1.45895	1.06235	3.92509
														At2g20340	8786816	8789853	sense	F11A3.11	tyrosine decarboxylaseputative	-0.411658	-1.36269	3.91181	-1.76788	-1.55599	1.88376	3.91181
														At4g39870	18501889	18504422	sense	T5J17.40	expressed protein	-1.05973	-1.02211	3.87595	-1.49244	-1.8327	2.2444	3.87595
														At1g60960	22448988	22450810	Complement	T7P1.10	metal transporter putative(IRT3)	-1.48587	-1.51348	3.86049	-0.472614	-2.71609	1.70823	3.86049
														At3g26830	9889190	9890942	sense	MDJ14.12	cytochrome P450 71B15 putative(CYP71B15)	-1.44924	-0.791548	3.85802	-1.19059	-1.98591	2.35825	3.85802
														At3g28460	10673303	10675632	Complement	MFJ20.15	expressed protein	-1.03053	-1.28181	3.85789	-1.00543	-2.07913	1.80053	3.85789
														At4g31230	15172903	15176115	Complement	F8F16.50	protein kinase family protein	-0.639961	-1.28757	3.85562	-1.70757	-1.69052	2.02781	3.85562
														At2g23170	9870935	9873642	Complement	T20D16.20	auxin-responsive GH3 familyprotein	-0.767123	0.308532	3.85316	-3.31796	-0.391834	3.59602	3.85316
														At4g33440	16091943	16094961	sense	F17M5.200	glycoside hydrolase family 28protein / polygalacturonase (pectinase) family protein	-0.805207	-1.76637	3.85139	-0.921393	-2.28715	1.50157	3.85139
														At3g23130	8242309	8243379	sense	K14B15.18	superman protein (SUP) / zincfinger (C2H2 type) family protein	0.204962	-0.490318	3.83243	-3.51414	-0.249026	2.76248	3.83243
														At1g61130	22532689	22535449	Complement	F11P17.14	serine carboxypeptidase S10family protein	-1.04415	-0.72625	3.82638	-1.64839	-1.55839	2.39319	3.82638
														At5g50400	20540801	20543457	Complement	MXI22.12	calcineurin-like phosphoesterasefamily protein	-0.724388	-1.50912	3.82538	-1.20619	-1.97948	1.68183	3.82538
														At1g06700	2052623	2055250	Complement	F4H5.21	serine/threonine protein kinaseputative	-2.07468	-0.204641	3.82428	-1.20743	-1.96916	2.97053	3.82428
														At1g25250	8849536	8851599	sense	F4F7.36	zinc finger (C2H2 type) familyprotein	-1.54368	0.223209	3.82177	-2.26001	-1.12419	3.46948	3.82177
														At3g47050	17339020	17341874	Complement	F13I12.100	glycosyl hydrolase family 3protein	0.25684	-1.71933	3.81017	-2.04346	-1.2568	1.48997	3.81017
														At2g19450	8433288	8436818	sense	F3P11.5	diacylglycerol O-acyltransferase/ acyl CoA:diacylglycerol acyltransferase (DGAT)	-0.675517	-1.36715	3.7962	-1.4241	-1.79983	1.83011	3.7962
														At2g28440	12168303	12169109	sense	T1B3.4	proline-rich family protein	-1.03067	-0.793326	3.79429	-1.60448	-1.60565	2.32892	3.79429
														At5g13150	4172972	4174933	Complement	T19L5.110	exocyst subunit EXO70 familyprotein	-1.27834	-0.612441	3.7882	-1.60592	-1.65541	2.55963	3.7882
														At4g33390	16075285	16077709	sense	F17M5.150	hypothetical protein	-1.4578	-0.871681	3.78415	-1.09164	-2.06418	2.25785	3.78415
														At1g80960	30420729	30423215	sense	F23A5.32	F-box protein-related	-0.416623	-0.793398	3.78201	-2.31186	-1.05691	2.35539	3.78201
														At3g55940	20758766	20761163	sense	F27K19.120	phosphoinositide-specificphospholipase C putative	0.13292	-0.313062	3.77017	-3.58764	-0.157941	2.86623	3.77017
														At3g09520	2923749	2925635	sense	F11F8.10	exocyst subunit EXO70 familyprotein	-1.01172	-0.8218	3.7592	-1.59649	-1.61278	2.29913	3.7592
														At1g74320	27944334	27946865	sense	F1O17.1	choline kinase putative	-1.61434	-0.871242	3.75543	-0.928879	-2.20483	2.24755	3.75543
														At2g46500	19093633	19096036	Complement	F13A10.3	phosphatidylinositol 3- and4-kinase family protein / ubiquitin family protein	-0.0497078	-0.456335	3.75068	-3.12322	-0.440749	2.6648	3.75068
														At5g02570	576740	577138	Complement	T22P11.160	histone H2B putative	-1.40453	-0.845778	3.73461	-1.22631	-1.9792	2.32007	3.73461
														At2g43870	18173692	18175341	Complement	F18O19.2	polygalacturonase putative /pectinase putative	0.101544	-1.40787	3.73211	-2.18832	-1.13241	1.75876	3.73211
														At5g06560	2003305	2006189	Complement	F15M7.9	expressed protein	-1.23341	-0.00698684	3.72725	-2.21219	-1.06639	3.11578	3.72725
														At1g77730	29219339	29220458	sense	T32E8.6	pleckstrin homology (PH)domain-containing protein	-0.256181	-1.37561	3.72315	-1.76667	-1.42703	1.73359	3.72315
														At5g07770	2474643	2479338	sense	MBK20.23	formin homology 2domain-containing protein / FH2 domain-containing protein	-0.827997	-0.15886	3.70742	-2.54772	-0.85409	2.96972	3.70742
														At1g11040	3679225	3680924	Complement	T19D16.7	DNAJ chaperone C-terminaldomain-containing protein	-0.76314	-1.27336	3.70531	-1.33302	-1.79964	1.82792	3.70531
														At1g68710	25796870	25801638	Complement	F24J5.6	haloacid dehalogenase-likehydrolase family protein	-0.325371	-1.38315	3.70425	-1.69704	-1.49528	1.73991	3.70425
														At5g43150	17342246	17343126	sense	MMG4.18	expressed protein	1.55091	-2.88219	3.7023	-2.23001	-1.02625	0.512365	3.7023
														At5g56780	22981491	22983467	Complement	MIK19.25	expressed protein	-1.57336	-0.939044	3.69948	-0.825022	-2.23939	2.11734	3.69948
														At5g39870	15985850	15987239	Complement	MYH19.6	hypothetical protein	-1.13348	-1.09298	3.69804	-1.18502	-1.96695	2.0358	3.69804
														At2g13680	5702206	5713216	sense	F13J11.3	glycosyl transferase family 48protein	-0.963438	-1.14069	3.69572	-1.43174	-1.84342	2.0794	3.69572
														At3g07840	2501899	2503571	Complement	F17A17.18	polygalacturonase putative /pectinase putative	-3.30823	-0.648571	3.69258	0.35707	-3.49093	2.45868	3.69258
														At3g57660	21364723	21373791	sense	F15B8.150	DNA-directed RNA polymerasefamily protein	-1.2077	-1.36404	3.68662	-0.682723	-2.32247	1.6641	3.68662
														At1g06750	2074029	2076349	sense	F4H5.16	hypothetical protein	-1.22014	-0.86298	3.68464	-1.2444	-1.84235	2.18246	3.68464
														At5g16480	5381116	5382900	Complement	MQK4.21	tyrosine specific proteinphosphatase family protein	-1.58814	-0.491345	3.67537	-1.29522	-1.81922	2.5763	3.67537
														At2g40900	17070220	17072747	Complement	T20B5.10	nodulin MtN21 family protein	0.600022	-2.18204	3.6601	-1.81912	-1.32459	0.998692	3.6601
														At5g54400	22107906	22109352	sense	GA469.1	expressed protein	-3.29445	0.139537	3.65865	-0.42029	-2.62511	3.23658	3.65865
														At1g52570	19587609	19590220	Complement	F6D8.21	phospholipase D alpha 2 / PLDalpha 2 (PLDALPHA2) (PLD2) / choline phosphatase 2	-1.39078	0.0679807	3.65726	-2.12461	-1.13505	3.16508	3.65726
														At5g20790	7039913	7040656	Complement	T1M15.190	expressed protein	0.882037	0.762441	3.63811	-6.48682	1.44026	3.93947	0
														At3g43930	15771935	15773667	Complement	T15B3.70	expressed protein	-5.83396	-2.40846	3.649	4.19936	-10.2778	0.865282	0
														At3g13620	4450191	4452594	Complement	K20M4.6	amino acid permease familyprotein	-3.85527	0.659207	3.65434	-0.527291	-2.54503	3.83525	0
														At1g22530	7955482	7958431	Complement	F12K8.13	SEC14 cytosolic factor familyprotein / phosphoglyceride transfer family protein	-2.30406	1.3242	3.65805	-2.54729	-0.765851	4.78108	0
														At1g12780	4355694	4358326	Complement	F13K23.3	UDP-glucose 4-epimerase /UDP-galactose 4-epimerase / Galactowaldenase	-0.982937	2.9589	3.67124	-6.84118	1.61737	7.09194	0
														At3g18000	6154369	6157558	sense	MEB5.22	phosphoethanolamineN-methyltransferase 1 / PEAMT 1 (NMT1)	-3.31774	0.654711	3.70764	-0.968678	-2.12746	3.89638	0
														At4g28270	14007545	14009025	Complement	F26K10.150	zinc finger (C3HC4-type RINGfinger) family protein	0.0532211	-0.0339341	3.70789	-3.78976	0.0163757	3.09888	0
														At4g16515	9305278	9305786	Complement	FCAALL.224	expressed protein	-6.44534	3.25565	3.72158	-1.35339	-1.86186	7.42451	0
														At2g45040	18584725	18585989	sense	T14P1.15	matrix metalloproteinase	-1.42133	2.3132	3.72311	-5.04832	0.734266	6.1714	0
														At1g74020	27838792	27840970	Complement	F2P9.11	strictosidine synthase familyprotein	2.73569	-0.442805	3.72642	-7.39614	1.91881	2.71279	0
														At1g52830	19676164	19677312	Complement	F14G24.10	auxin-responsive protein /indoleacetic acid-induced protein 6 (IAA6)	-4.04855	4.4615	3.75133	-4.23202	0.272651	10.8496	0
														At5g54130	21981074	21982505	sense	MJP23.11	calcium-binding EF hand familyprotein	0.311292	1.65906	3.75841	-6.60631	1.71984	4.98627	0
														At1g14290	4880046	4881947	Complement	F14L17.5	acid phosphatase putative	-5.60469	2.11757	3.76691	-0.902892	-2.27251	5.89862	0
														At2g47270	19418630	19419221	Complement	T8I13.11	expressed protein	-2.73214	4.87384	3.77812	-6.40075	1.51254	10.2598	0
														At2g36320	15236239	15237575	sense	F2H17.7	zinc finger (AN1-like) familyprotein	-1.36136	1.78156	3.78148	-4.4431	0.356113	5.4852	0
														At3g14490	4863638	4865956	Complement	MOA2.12	terpene synthase/cyclase familyprotein	-1.87228	1.86408	3.79119	-3.86077	0.00787738	5.48346	0
														At5g61960	24895747	24901877	Complement	K22G18.10	RNA recognition motif(RRM)-containing protein	-1.11081	1.25983	3.79928	-4.10351	0.133025	4.90351	0
														At5g07000	2171404	2172940	Complement	MOJ9.17	sulfotransferase family protein	-2.41351	0.963657	3.80974	-2.19478	-1.17133	4.36782	0
														At2g03980	1259196	1262549	sense	F3C11.9	GDSL-motif lipase/hydrolasefamily protein	0.297732	-7.74089	3.81286	2.06883	-5.64771	-2.03565	0
														At3g04010	1036848	1039489	Complement	T11I18.12	glycosyl hydrolase family 17protein	-1.28589	1.88556	3.81894	-4.6877	0.508489	5.48865	0
														At4g24380	12612546	12614027	sense	T22A6.210	expressed protein	-0.882376	0.754742	3.82164	-3.67508	-0.102593	4.21239	0
														At3g51360	19075273	19077539	Complement	F24M12.400	aspartyl protease familyprotein	-2.72707	1.85434	3.82289	-2.89443	-0.648115	5.76015	0
														At1g03870	982508	983539	Complement	F21M11.20	fasciclin-likearabinogalactan-protein (FLA9)	-5.2963	2.61614	3.82359	-1.5953	-1.6885	6.82184	0
														At2g46490	19086478	19087125	sense	F13A10.2	expressed protein (APS2)	-2.66561	0.853778	3.8562	-1.88722	-1.47314	4.24825	0
														At1g80280	30188433	30191478	Complement	F5I6.3	hydrolase alpha/beta fold familyprotein	-6.0562	-2.05161	3.85828	3.74808	-8.8972	1.31579	0
														At5g48460	19653327	19656714	Complement	MJE7.9	fimbrin-like protein putative	-5.17115	2.79529	3.87812	-1.88934	-1.47309	7.29651	0
														At5g05180	1536227	1538493	sense	K2A11.5	expressed protein	-4.26672	0.874504	3.89611	-0.637246	-2.60344	4.3324	0
														At5g46840	19022828	19024993	sense	MSD23.2	RNA recognition motif(RRM)-containing protein	-2.48945	-2.36425	3.91802	1.18337	-4.69586	1.07159	0
														At3g62630	23174723	23176171	Complement	F26K9.60	expressed protein	-2.98567	2.24134	3.92042	-3.16466	-0.55373	6.10773	0
														At1g79660	29980756	29981666	sense	F20B17.9	expressed protein	-2.94217	0.901516	3.93414	-1.74295	-1.64096	4.38589	0
														At5g47920	19420399	19421314	Complement	MCA23.26	expressed protein	-2.97257	0.834303	3.95205	-1.63549	-1.70784	4.35146	0
														At2g39510	16498221	16500210	Complement	F12L6.17	nodulin MtN21 family protein	-6.64248	0.612152	3.98282	0.801794	-4.28193	4.07812	0
														At3g14560	4889079	4890166	sense	MIE1.6	expressed protein	-0.671656	0.681305	3.9888	-4.07319	0.01337	4.20144	0
														At4g34770	16591234	16591897	sense	F11I11.10	auxin-responsive familyprotein	-3.19622	1.76952	4.00055	-2.5069	-1.07617	5.64767	0
														At1g28130	9825296	9828054	sense	F13K9.22	auxin-responsive GH3 familyprotein	0.03418	2.22501	4.02387	-8.10605	1.9531	6.19715	0
														At3g15510	5243518	5245389	sense	MJK13.17	no apical meristem (NAM) familyprotein (NAC2)	-3.93081	2.53154	4.02398	-2.65416	-0.984971	6.73224	0
														At1g76410	28673742	28674540	sense	F14G6.1	zinc finger (C3HC4-type RINGfinger) family protein	-2.7044	3.37541	4.03578	-4.91486	0.517178	7.95416	0
														At1g35190	12890415	12892852	sense	T32G9.27	oxidoreductase 2OG-Fe(II)oxygenase family protein	-2.91697	4.4315	4.04439	-6.00317	1.01902	11.7549	0
														At1g61680	22776120	22778352	Complement	T13M11.3	terpene synthase/cyclase familyprotein	-2.97802	4.75731	4.05114	-6.32	1.1736	12.5881	0
														At4g19120	10460306	10464173	Complement	T18B16.90	early-responsive to dehydrationstress protein (ERD3)	-3.05733	1.94013	4.05462	-2.86208	-0.823679	6.11129	0
														At3g14350	4782764	4787174	Complement	MLN21.15	leucine-rich repeattransmembrane protein kinase putative	-6.64939	1.55379	4.05704	0.117087	-3.54719	5.24563	0
														At5g66550	26576856	26578404	Complement	K1F13.22	Maf family protein	-2.16453	-1.81262	4.08843	0.542832	-4.1525	1.31057	0
														At1g48300	17851024	17852466	sense	F11A17.15	expressed protein	-5.48043	1.64685	4.10861	-0.720131	-2.72762	5.47172	0
														At2g35960	15114019	15114966	sense	F11F19.13	harpin-induced family protein /HIN1 family protein / harpin-responsive family protein	-3.57223	1.67688	4.11604	-2.15761	-1.41732	5.648	0
														At3g61850	22906334	22908533	sense	F21F14.20	Dof zinc finger protein DAG1 /Dof affecting germination 1 (DAG1) / transcription factorBBFa (BBFA)	-2.65245	2.02589	4.11628	-3.45315	-0.467059	6.19996	0
														At3g01470	182567	184410	Complement	F4P13.2	homeobox-leucine zipper protein 5(HAT5) / HD-ZIP protein 5 / HD-ZIP protein (HB-1)	-1.01609	3.02805	4.1266	-7.52071	1.64769	7.73007	0
														At3g01980	327462	329029	Complement	F1C9.24	short-chaindehydrogenase/reductase (SDR) family protein	-6.47524	4.27644	4.16824	-2.58743	-1.12756	11.0144	0
														At1g29230	10214846	10216408	sense	F28N24.9	CBL-interacting protein kinase18 (CIPK18)	-2.70773	2.77045	4.17083	-4.33675	0.0662057	7.34565	0
														At4g02290	1002446	1005202	Complement	T2H3.5	glycosyl hydrolase family 9protein	-8.95429	-0.725646	4.21806	3.30912	-8.31806	2.79322	0
														At4g16590	9345172	9349243	sense	FCAALL.402	glucosyltransferase-related	-3.45859	2.97507	4.22029	-3.76879	-0.329752	7.69853	0
														At2g22560	9593243	9595918	sense	F14M13.4	kinase interactingprotein-related	-0.325384	0.394542	4.22964	-4.43588	0.0635916	4.01362	0
														At4g36110	17089952	17090828	sense	T19K4.240	auxin-responsive proteinputative	-6.78905	2.01224	4.24184	-0.469858	-3.07368	6.16361	0
														At3g03090	700463	704724	Complement	T17B22.22	sugar transporter familyprotein	-1.8682	-2.54544	4.25881	0.77687	-4.75113	0.883437	0
														At5g65660	26262475	26263605	Complement	K21L13.18	hydroxyproline-richglycoprotein family protein	-3.22335	1.59351	4.31898	-2.55572	-1.25444	5.68098	0
														At2g39890	16662757	16665409	sense	T28M21.5	proline transporter 1 (ProT1)	-1.99463	2.46391	4.32064	-5.05868	0.384161	7.13449	0
														At1g71960	27086056	27091910	Complement	F17M19.11	ABC transporter family protein	-2.02093	0.860208	4.32247	-2.90836	-0.951301	4.71386	0
														At1g77590	29153150	29156670	Complement	T5M16.18	long-chain-fatty-acid--CoAligase family protein / long-chain acyl-CoA synthetasefamily protein (LACS9)	-2.93876	0.720851	4.33489	-1.77129	-1.7741	4.56351	0
														At2g25880	11041742	11043442	Complement	F17H15.9	serine/threonine protein kinaseputative	-2.67912	-2.3891	4.33516	1.09684	-5.05662	1.27051	0
														At5g03120	733978	734942	sense	F15A17.150	expressed protein	-4.01462	2.63061	4.35016	-2.96474	-0.946673	7.55645	0
														At1g32450	11715130	11719935	Complement	F5D14.23	proton-dependent oligopeptidetransport (POT) family protein	1.03658	1.71102	4.39715	-11.3881	2.44125	5.91172	0
														At1g70830	26713609	26715096	Complement	F15H11.8	Bet v I allergen family protein	-6.23216	-2.40018	4.40949	3.57357	-14.3864	1.25372	0
														At1g69850	26300339	26304109	Complement	T17F3.12	nitrate transporter (NTL1)	-1.6814	1.85552	4.41134	-4.76047	0.154976	6.31198	0
														At3g61540	22784361	22786802	sense	F2A19.140	peptidase family protein	-2.91469	0.827748	4.41172	-2.02089	-1.67421	4.76376	0
														At1g25230	8840394	8842300	Complement	F4F7.38	purple acid phosphatase familyprotein	-4.93945	3.59721	4.45494	-3.25978	-0.760505	11.271	0
														At4g13790	7999710	8000218	Complement	F18A5.180	auxin-responsive proteinputative	-1.55619	3.25624	4.48199	-7.31203	1.34987	8.79344	0
														At1g12080	4084203	4085041	sense	F12F1.4	expressed protein	-2.29183	2.83916	4.48202	-5.29221	0.432016	7.90774	0
														At5g20240	6829123	6831456	sense	F5O24.130	floral homeotic proteinPISTILLATA (PI)	-3.36103	4.91071	4.49187	-6.45205	1.02406	13.1576	0
														At4g01480	626118	628036	sense	F11O4.12	inorganic pyrophosphataseputative [soluble] / pyrophosphate phospho-hydrolaseputative / PPase putative	0.549149	0.720125	4.49503	-7.17314	1.10842	4.66751	0
														At1g09155	2949678	2950991	Complement	T12M4.17	SKP1 interacting partner3-related	-3.99604	2.87484	4.54145	-3.39115	-0.745997	8.4952	0
														At2g45580	18789400	18791417	Complement	F17K2.11	cytochrome P450 family protein	-5.65662	4.18403	4.57292	-3.34401	-0.830785	11.2411	0
														At5g48900	19842363	19846318	sense	K24G6.1	pectate lyase family protein	-5.91349	4.93941	4.5831	-3.83166	-0.523341	12.7957	0
														At1g75750	28445202	28446023	Complement	F10A5.6	gibberellin-regulated protein 1(GASA1) / gibberellin-responsive protein 1	0.311305	1.24074	4.64636	-8.27674	1.35503	5.59066	0
														At4g01430	585609	588028	sense	F3D13.4	nodulin MtN21 family protein	2.60261	-1.445	4.64989	-6.71517	0.908008	2.33843	0
														At5g64330	25744563	25748328	sense	MSJ1.17	non-phototropic hypocotyl 3(NPH3)	-4.99607	3.71436	4.67838	-3.52519	-0.763584	10.9548	0
														At5g50790	20673479	20675225	Complement	MFB16.26	nodulin MtN3 family protein	-5.90897	0.0783447	4.69026	0.551619	-4.58432	3.96515	0
														At1g12450	4244308	4245990	sense	F5O11.19	expressed protein	-2.29524	0.788579	4.76278	-2.91982	-1.24349	4.97351	0
														At2g40610	16955941	16957635	Complement	T2P4.4	expansin putative (EXP8)	-7.10701	5.13567	4.78943	-3.37274	-0.978112	14.457	0
														At2g24210	10301410	10304481	sense	F27D4.12	myrcene/ocimene synthase(TPS10)	-4.02926	5.51013	4.82201	-6.60269	0.928549	16.1694	0
														At4g32830	15842457	15844540	sense	T16I18.40	protein kinase putative	-3.47521	-2.50026	4.90309	1.48612	-6.26212	1.52831	0
														At5g59540	24013305	24014811	Complement	F2O15.6	oxidoreductase 2OG-Fe(II)oxygenase family protein	-1.14529	0.673023	4.91943	-4.27928	-0.396586	4.95961	0
														At4g18425	10181345	10182151	Complement	F28J12.6	expressed protein	-4.5151	3.68328	4.92283	-4.13169	-0.521263	10.7328	0
														At1g62480	23132370	23133424	sense	T3P18.4	vacuolar calcium-bindingprotein-related	-3.11129	2.14283	4.92938	-3.7916	-0.712214	7.50991	0
														At2g38400	16090769	16093427	sense	T19C21.11	alanine--glyoxylateaminotransferase putative / beta-alanine-pyruvateaminotransferase putative / AGT putative	-2.20898	1.40124	4.94469	-3.94336	-0.647547	6.01364	0
														At2g25530	10870137	10873835	sense	F13B15.19	AFG1-like ATPase familyprotein	-2.14044	0.878218	4.96946	-3.25216	-1.02889	5.36392	0
														At5g67020	26767076	26768475	sense	K8A10.9	expressed protein	-3.5688	2.4674	5.00514	-3.782	-0.797099	7.91413	0
														At5g55930	22669941	22673459	sense	MYN21.4	oligopeptide transporter OPTfamily protein	0.706355	0.0255119	5.01412	-6.35785	0.631913	4.20858	0
														At3g10310	3190213	3195010	sense	F14P13.9	kinesin motor protein-related	-3.22994	4.11946	5.03779	-6.31228	0.641728	11.8341	0
														At4g22490	11849715	11850342	Complement	F7K2.70	protease inhibitor/seedstorage/lipid transfer protein (LTP) family protein	-3.21867	-2.59835	5.07701	1.18831	-5.78305	1.63526	0
														At3g55830	20726080	20729017	sense	F27K19.10	glycosyltransferase familyprotein 47	-4.96092	4.06202	5.13753	-4.28453	-0.527577	12.9956	0
														At2g20870	8989071	8989793	Complement	F5H14.16	cell wall protein precursorputative	-4.26388	2.44604	5.15908	-3.22092	-1.30279	7.90995	0
														At5g26310	9234688	9236388	sense	F9D12.4	UDP-glucoronosyl/UDP-glucosyltransferase family protein	-2.53041	0.825539	5.40278	-3.17397	-1.3959	5.61256	0
														At5g10770	3403120	3405449	Complement	T30N20.40	chloroplast nucleoidDNA-binding protein putative	-3.44799	1.04087	5.51834	-2.59239	-1.90192	6.07185	0
														At3g51270	19044830	19047751	sense	F24M12.310	RIO1 family protein	-5.05105	1.86969	5.54125	-2.22198	-2.19405	7.77165	0
														At1g22990	8139154	8140191	sense	F19G10.25	heavy-metal-associateddomain-containing protein / copper chaperone(CCH)-related	-2.1872	1.09701	5.81268	-4.25047	-0.888367	6.42178	0
														At4g18960	10382867	10388550	sense	F13C5.130	floral homeotic protein AGAMOUS(AG)	-3.879	-4.00777	6.06325	2.33126	-9.04896	1.15612	0
														At2g28630	12282396	12284322	Complement	T8O18.8	beta-ketoacyl-CoA synthase familyprotein	-5.72222	3.1687	6.1325	-3.52209	-1.61482	11.6079	0
														At5g07010	2174679	2176107	Complement	MOJ9.18	sulfotransferase family protein	-2.59442	2.04657	6.16992	-5.37781	-0.416673	8.76337	0
														At5g49130	19933130	19934751	sense	K20J1.11	MATE efflux family protein	-1.09185	1.15874	6.17282	-6.42236	0.065142	6.86629	0
														At5g24240	8231113	8232928	Complement	MOP9.5	phosphatidylinositol 3- and4-kinase family protein / ubiquitin family protein	-2.42237	1.38449	6.35085	-4.72367	-0.825177	7.6058	0
														At5g38130	15235179	15236602	Complement	F16F17.2	transferase family protein	-3.13283	0.955065	6.4373	-3.4151	-1.75405	6.74228	0

## Sheet: CAR
Genes down-regulated in CARpels (all: 846, highest absolute D stat: 597)														Genes up-regulated in CARpels (all: 1255, highest absolute D stat: 1177)
gene	bpstart	bpend	strand	synonym	annotation	SEP	PET	STA	CAR	SEP+PET	PET+STA	d stat test		gene	bpstart	bpend	strand	synonym	annotation	SEP	PET	STA	CAR	SEP+PET	PET+STA	d stat test
At5g45890	18630486	18632157	sense	K15I22.9	senescence-specific SAG12protein (SAG12) / cysteine proteinase putative	3.32936	2.93048	1.95727	-16.1632	6.15245	4.54815	16.1632		At1g09310	3009057	3009882	sense	T31J12.3	expressed protein	-1.93567	-3.06326	-3.25168	19.2605	-4.66598	-6.29173	19.2605
At5g56870	23021422	23025875	sense	MPI10.3	beta-galactosidase putative /lactase putative	2.88987	2.34199	1.94022	-15.5718	5.0841	4.00605	15.5718		At3g04290	1133331	1136297	Complement	T6K12.9	GDSL-motif lipase/hydrolasefamily protein	-2.97482	-2.58131	-2.47254	18.6749	-5.34027	-4.78036	18.6749
At3g48710	18051962	18055173	sense	T8P19.220	expressed protein	3.0218	1.43247	2.63008	-13.3263	4.11122	3.73237	13.3263		At4g12960	7583269	7584627	sense	F25G13.50	gamma interferon responsivelysosomal thiol reductase family protein / GILT familyprotein	-2.54637	-3.15645	-2.39075	17.9259	-5.52193	-5.34224	17.9259
At3g04070	1061533	1063101	Complement	T6K12.31	no apical meristem (NAM) familyprotein	2.67603	2.48599	1.99793	-13.2558	4.93632	4.18773	13.2558		At5g24420	8336617	8337971	Complement	K16H17.13	glucosamine/galactosamine-6-phosphate isomerase-related	-2.02347	-3.43635	-2.50451	17.821	-5.20681	-5.84697	17.821
At1g64370	23892583	23893324	sense	F15H21.1	expressed protein	1.87636	3.62414	1.88689	-13.1011	5.24618	5.2758	13.1011		At1g72290	27219451	27220453	sense	T9N14.19	trypsin and protease inhibitorfamily protein / Kunitz family protein	-3.20558	-3.16827	-1.87697	17.2473	-6.29584	-4.70328	17.2473
At4g15530	8864826	8870934	Complement	FCAALL.325	pyruvate phosphate dikinasefamily protein	3.26031	1.35831	2.02248	-13.0093	4.31565	3.08355	13.0093		At1g54020	20165340	20167406	Complement	F15I1.10	myrosinase-associated proteinputative	-2.45245	-2.48506	-1.5977	16.7535	-4.90938	-3.85422	16.7535
At2g25450	10836995	10838733	Complement	F13B15.11	2-oxoglutarate-dependentdioxygenase putative	3.68323	1.46638	2.37807	-11.9024	4.72554	3.47457	11.9024		At1g28290	9889112	9890980	Complement	F3H9.6	pollen Ole e 1 allergen andextensin family protein	-2.85363	-2.54698	-2.30979	16.5836	-5.202	-4.58884	16.5836
At4g00780	334733	336310	sense	T18A10.3	meprin and TRAF homologydomain-containing protein / MATH domain-containingprotein	3.1523	2.57184	1.61335	-11.808	5.51343	3.8271	11.808		At2g28790	12361507	12362508	Complement	F8N16.8	osmotin-like protein putative	-3.64122	-2.71929	-1.65975	16.4378	-6.32037	-4.02593	16.4378
At4g33150	15985201	15991541	Complement	F4I10.80	lysine-ketoglutaratereductase/saccharopine dehydrogenase bifunctional enzyme	1.5639	3.03381	2.2197	-11.6058	4.27624	5.09047	11.6058		At3g08740	2654647	2656242	Complement	F17O14.21	elongation factor P (EF-P)family protein	-4.13287	-3.0125	-0.793471	15.9723	-7.57172	-3.39367	15.9723
At1g13990	4794761	4796594	sense	F7A19.8	expressed protein	3.96713	2.28245	0.982613	-11.4651	6.16098	2.91879	11.4651		At1g57750	21387646	21389374	Complement	T8L23.21	cytochrome P450 putative	-2.8037	-2.50285	-2.63563	15.9314	-5.03685	-4.86329	15.9314
At1g32450	11715130	11719935	Complement	F5D14.23	proton-dependent oligopeptidetransport (POT) family protein	1.03658	1.71102	4.39715	-11.3881	2.44125	5.91172	11.3881		At5g20630	6975106	6975995	Complement	T1M15.30	germin-like protein (GER3)	-2.89146	-2.07196	-3.01854	15.9156	-4.63539	-4.78478	15.9156
At4g20260	10940746	10943512	sense	F1C12.180	DREPP plasma membranepolypeptide family protein	1.18045	4.11953	2.03807	-11.1456	4.83205	5.95695	11.1456		At5g21150	7192242	7198327	sense	T10F18.180	PAZ domain-containing protein/ piwi domain-containing protein	-2.73072	-2.75099	-1.86807	15.2164	-5.34694	-4.33401	15.2164
At1g21000	7337740	7339441	sense	F9H16.1	zinc-binding family protein	2.41266	3.07926	1.40336	-11.087	5.31662	4.13025	11.087		At1g70710	26662794	26666662	Complement	F5A18.11	endo-14-beta-glucanase (EGASE)/ cellulase	-2.88233	-2.67068	-2.17894	15.0886	-5.34466	-4.55201	15.0886
At5g40690	16307939	16308811	sense	MNF13.25	expressed protein	2.36167	3.12326	1.57294	-11.0145	5.24892	4.34262	11.0145		At2g33850	14328138	14329125	Complement	T1B8.15	expressed protein	-2.71099	-2.81428	-2.47062	15.0054	-5.25776	-4.999	15.0054
At1g69490	26125803	26127078	sense	F10D13.14	no apical meristem (NAM) familyprotein	3.40367	2.83891	1.14027	-10.9132	6.09128	3.57695	10.9132		At1g18250	6276781	6278038	Complement	T10O22.21	thaumatin putative	-2.60149	-2.58563	-2.24751	14.963	-4.95259	-4.56406	14.963
At5g51070	20781541	20785907	sense	K3K7.27	ATP-dependent Clp proteaseATP-binding subunit (ClpD) (ERD1)	3.51789	2.76432	0.635135	-10.6136	6.33715	3.01238	10.6136		At1g72970	27456438	27459594	sense	F3N23.17	glucose-methanol-choline (GMC)oxidoreductase family protein	-3.6586	-2.65924	-1.64919	14.9197	-6.21066	-3.94477	14.9197
At1g78670	29595848	29598392	sense	F9K20.29	gamma-glutamyl hydrolaseputative / gamma-Glu-X carboxypeptidase putative /conjugase putative	2.93949	2.37775	0.99599	-10.5586	5.27346	3.04943	10.5586		At4g03210	1415949	1417327	sense	F4C21.14	xyloglucan:xyloglucosyltransferase putative / xyloglucan endotransglycosylaseputative / endo-xyloglucan transferase putative	-4.21594	-2.47999	-1.37134	14.1976	-6.61289	-3.47809	14.1976
At4g15620	8913840	8915658	sense	FCAALL.348	integral membrane familyprotein	2.11502	5.0819	0.23406	-10.5253	7.19696	4.55235	10.5253		At5g51750	21037433	21040007	sense	MIO24.12	subtilase family protein	-2.93596	-3.03418	-1.89904	14.1877	-5.79483	-4.59302	14.1877
At4g35060	16685725	16686708	Complement	M4E13.120	heavy-metal-associateddomain-containing protein / copper chaperone(CCH)-related	0.390586	3.3446	3.22186	-10.3914	3.25888	6.76177	10.3914		At2g42840	17833078	17834560	Complement	F7D19.16	protodermal factor 1 (PDF1)	-2.46187	-2.51602	-2.02732	13.5391	-4.78254	-4.28984	13.5391
At1g58180	21541600	21543461	Complement	T18I24.9	carbonic anhydrase familyprotein / carbonate dehydratase family protein	2.05227	2.06467	1.21985	-10.3402	4.03852	3.05519	10.3402		At1g44970	17004652	17006124	sense	F27F5.6	peroxidase putative	-1.63692	-3.95677	-2.1711	13.5313	-5.23065	-5.94646	13.5313
At1g67865	25449952	25450400	Complement	T23K23.30	expressed protein	1.70316	2.77941	2.28349	-10.3379	4.14063	4.81549	10.3379		At5g45670	18545728	18547677	sense	MRA19.6	GDSL-motif lipase/hydrolasefamily protein	-2.95353	-2.7253	-1.79106	13.3891	-5.50971	-4.18599	13.3891
At1g67860	25448468	25448926	Complement	T23K23.29	expressed protein	2.46203	3.18125	1.33537	-10.3359	5.41995	4.12635	10.3359		At5g09730	3015248	3018263	Complement	F17I14.80	glycosyl hydrolase family 3protein	-3.83916	-1.09754	-2.74785	13.2194	-4.45885	-3.45275	13.2194
At3g11900	3758458	3760384	sense	F26K24.19	amino acid transporter familyprotein	1.58564	2.98427	2.25	-10.2713	4.21607	5.00071	10.2713		At5g44630	18020507	18022843	sense	K15C23.7	terpene synthase/cyclase familyprotein	-3.08602	-3.15467	-1.43481	13.0694	-6.14986	-4.20258	13.0694
At1g20440	7084399	7085762	Complement	F5M15.22	dehydrin (COR47)	0.453081	2.81105	3.2624	-10.2107	2.86486	6.26309	10.2107		At3g11960	3786393	3793663	sense	F26K24.25	cleavage and polyadenylationspecificity factor (CPSF) A subunit C-terminaldomain-containing protein	-2.22908	-2.26872	-2.15109	13.0399	-4.26301	-4.18976	13.0399
At4g08290	5238903	5241027	sense	T12G13.130	nodulin MtN21 family protein	1.25675	2.07469	3.47831	-9.93696	2.98442	5.31994	9.93696		At5g47500	19288186	19290101	Complement	MNJ7.9	pectinesterase family protein	-2.77347	-2.36548	-1.95999	12.7759	-4.9211	-4.02576	12.7759
At5g47560	19304595	19307691	Complement	MNJ7.15	sodium/dicarboxylatecotransporter putative	2.37906	2.19813	1.58268	-9.69235	4.33811	3.48314	9.69235		At1g72260	27202095	27203106	Complement	T9N14.13	thionin (THI2.1)	-3.83015	-4.34329	0.349048	12.4652	-9.46751	-3.30299	12.4652
At2g25625	10913532	10914366	sense	F3N11.22	expressed protein	4.65226	1.2397	1.05303	-9.68928	5.42385	2.02827	9.68928		At4g12890	7546375	7547569	sense	T20K18.240	gamma interferon responsivelysosomal thiol reductase family protein / GILT familyprotein	-2.25156	-2.34441	-2.27305	12.4561	-4.33981	-4.3775	12.4561
At1g80160	30155895	30157082	sense	F18B13.24	lactoylglutathione lyase familyprotein / glyoxalase I family protein	2.42211	2.11697	1.46477	-9.6151	4.34489	3.29609	9.6151		At5g49180	19957904	19960233	Complement	K21P3.5	pectinesterase family protein	-2.51849	-2.53665	-2.30637	12.3617	-4.75602	-4.53871	12.3617
At3g44980	16452008	16453083	sense	F14D17.50	hypothetical protein	1.34922	3.94745	1.33367	-9.46025	4.91361	4.91197	9.46025		At5g23960	8092972	8095131	sense	MZF18.16	terpene synthase/cyclase familyprotein	-2.45065	-2.00158	-2.79224	12.0735	-4.10637	-4.47853	12.0735
At3g15720	5325297	5327544	Complement	MSJ11.12	glycoside hydrolase family 28protein / polygalacturonase (pectinase) family protein	2.43073	1.71549	1.31336	-9.41346	3.96079	2.772	9.41346		At4g29030	14307255	14307979	sense	F25O24.1	glycine-rich protein	-2.43086	-2.49206	-2.33602	11.8431	-4.6189	-4.52891	11.8431
At1g44800	16916449	16919436	Complement	T12C22.7	nodulin MtN21 family protein	1.52995	1.88329	3.06053	-9.3923	3.07904	4.66459	9.3923		At3g20490	7153600	7156542	Complement	K10D20.3	expressed protein	-2.24387	-2.73643	-2.39138	11.7675	-4.65332	-4.83443	11.7675
At2g46680	19172479	19174019	Complement	T3A4.6	homeobox-leucine zipper protein 7(HB-7) / HD-ZIP transcription factor 7	2.01804	2.75679	1.55579	-9.38101	4.50855	3.99509	9.38101		At4g21480	11433314	11435296	Complement	F18E5.100	glucose transporter putative	-3.15325	-2.20593	-1.59816	11.505	-5.14039	-3.47411	11.505
At5g54080	21963095	21966139	sense	MJP23.6	homogentisate 12-dioxygenase /homogentisicase/homogentisate oxygenase / homogentisicacid oxidase (HGO)	0.995813	3.24957	1.98444	-9.3421	3.84599	5.07322	9.3421		At4g29020	14304927	14305727	sense	F25O24.2	glycine-rich protein	-2.8431	-2.2042	-2.19458	11.4472	-4.72841	-4.05935	11.4472
At4g08300	5244888	5248339	sense	T12G13.140	nodulin MtN21 family protein	1.43672	1.97243	2.43881	-9.33291	3.11868	4.2249	9.33291		At3g20180	7043391	7043847	Complement	MAL21.22	hypothetical protein	-1.5615	-2.73785	-2.81151	11.4294	-3.93275	-5.36658	11.4294
At5g04340	1216132	1217107	Complement	T19N18.70	zinc finger (C2H2 type) familyprotein	1.11925	2.07435	3.423	-9.23357	2.84772	5.24388	9.23357		At3g54510	20191270	20194487	sense	T14E10.80	early-responsive to dehydrationprotein-related / ERD protein-related	-1.71813	-2.39154	-2.22304	11.2789	-3.83316	-4.43127	11.2789
At2g26690	11354225	11358071	Complement	F18A8.6	nitrate transporter (NTP2)	1.57792	3.20862	1.32546	-9.09988	4.51596	4.22017	9.09988		At2g27040	11543612	11549431	Complement	T20P8.9	PAZ domain-containing protein /piwi domain-containing protein	-2.93496	-1.49735	-1.41072	11.2371	-4.24791	-2.65158	11.2371
At1g55270	20620733	20623803	Complement	F7A10.28	kelch repeat-containing F-boxfamily protein	1.05759	3.37852	1.78656	-9.01822	4.03319	4.94216	9.01822		At4g01310	543970	545535	Complement	F2N1.5	ribosomal protein L5 familyprotein	-2.29645	-1.28194	-2.65533	11.2314	-3.26149	-3.63004	11.2314
At4g22920	12016536	12018503	Complement	F7H19.100	expressed protein	1.90422	4.10368	0.57456	-8.89474	5.78497	4.13163	8.89474		At2g02100	528349	529107	sense	F5O4.13	plant defensin-fusion proteinputative (PDF2.2)	-2.86675	-1.43045	-2.81621	11.157	-3.91083	-3.87463	11.157
At5g18600	6183265	6183956	Complement	T28N17.80	glutaredoxin family protein	1.37243	5.43564	0.13955	-8.87884	6.44866	4.70495	8.87884		At2g27880	11878565	11883789	sense	F15K20.33	argonaute protein putative /AGO putative	-2.65333	-2.28952	-1.63497	11.0931	-4.73594	-3.62012	11.0931
At3g11630	3672126	3674081	sense	F24K9.28	2-cys peroxiredoxin chloroplast(BAS1)	2.44835	1.64314	2.17234	-8.87079	3.73892	3.48106	8.87079		At4g21630	11492260	11495512	Complement	F17L22.90	subtilase family protein	-2.32715	-2.33139	-2.23326	11.0787	-4.35512	-4.26873	11.0787
At2g28400	12155381	12156129	Complement	T1B3.8	expressed protein	1.27012	3.30463	1.81268	-8.84887	4.17448	4.82481	8.84887		At3g23805	8586389	8587063	sense	MYM9.15	rapid alkalinization factor(RALF) family protein	-2.12243	-1.76294	-2.64173	11.0262	-3.57127	-4.12531	11.0262
At4g10310	6391980	6395803	sense	F24G24.110	sodium transporter (HKT1)	1.74604	5.30578	-0.149432	-8.79968	6.9105	4.26475	8.79968		At5g08000	2563610	2565492	sense	F13G24.200	glycosyl hydrolase familyprotein 17	-2.349	-2.48427	-2.09111	11.0228	-4.54179	-4.27264	11.0228
At4g30270	14819198	14820540	Complement	F9N11.120	MERI-5 protein (MERI-5)(MERI5B) / endo-xyloglucan transferase / xyloglucanendo-14-beta-D-glucanase (SEN4)	1.42087	2.13783	2.424	-8.78442	3.24019	4.33471	8.78442		At4g15750	8967555	8968602	Complement	FCAALL.95	invertase/pectin methylesteraseinhibitor family protein	-2.33221	-2.32539	-2.20801	10.8752	-4.35171	-4.2325	10.8752
At1g67870	25453030	25454675	Complement	T23K23.28	glycine-rich protein	3.24021	1.08921	1.6817	-8.77536	3.94568	2.48013	8.77536		At4g11290	6869959	6871657	sense	F8L21.80	peroxidase putative	-2.38472	-2.36318	-2.03143	10.7746	-4.45996	-4.09003	10.7746
At1g64360	23891533	23892167	sense	F15H21.8	expressed protein	4.45388	3.03315	-0.744327	-8.76243	8.11429	1.90487	8.76243		At5g67070	26785321	26786072	sense	K21H1.3	rapid alkalinization factor(RALF) family protein	-3.51603	-1.18797	-2.18304	10.7258	-4.27847	-3.02892	10.7258
At3g10260	3171231	3172971	Complement	F14P13.14	reticulon family protein	0.95647	2.32241	2.8337	-8.72872	2.93301	4.99506	8.72872		At2g05790	2199389	2201480	sense	T17C22.2	glycosyl hydrolase family 17protein	-4.17195	-1.31859	-1.82104	10.7166	-5.02499	-2.80391	10.7166
At5g14780	4776987	4779497	sense	T9L3.80	formate dehydrogenase (FDH)	2.29846	2.41454	1.32323	-8.70551	4.46127	3.41074	8.70551		At4g24780	12770341	12772343	Complement	F22K18.20	pectate lyase family protein	-1.63603	-2.7551	-2.35796	10.6447	-4.05182	-4.89509	10.6447
At5g17450	5755324	5756890	sense	K3M16.20	heavy-metal-associateddomain-containing protein / copper chaperone(CCH)-related	3.33085	1.84943	0.754962	-8.57341	5.01958	2.31694	8.57341		At1g08560	2709635	2710914	Complement	F22O13.4	syntaxin-related protein KNOLLE(KN) / syntaxin 111 (SYP111)	-2.21087	-2.53247	-2.06142	10.6304	-4.43752	-4.29062	10.6304
At4g19420	10587177	10590560	Complement	T5K18.200	pectinacetylesterase familyprotein	1.10434	4.29425	0.742178	-8.54318	5.02255	4.53784	8.54318		At3g08000	2554840	2555847	Complement	F17A17.34	RNA-binding protein putative	-2.25796	-1.82657	-2.81035	10.583	-3.73433	-4.31004	10.583
At1g73750	27740291	27742740	sense	F25P22.17	expressed protein	2.24156	1.5173	1.89133	-8.53075	3.46558	3.12534	8.53075		At2g02850	826542	827785	Complement	T17M13.2	plastocyanin-likedomain-containing protein / plantacyanin putative	-4.84301	-1.22756	-1.02497	10.2106	-5.62164	-1.9917	10.2106
At1g55920	20915781	20917112	sense	F14J16.18	serine O-acetyltransferaseputative	3.66709	2.49835	0.119708	-8.52503	6.19948	2.27447	8.52503		At4g38660	18066171	18068095	Complement	F20M13.220	thaumatin putative	-2.30461	-2.22058	-2.14102	10.1985	-4.21251	-4.05304	10.1985
At3g14010	4636373	4640977	sense	MDC16.14	hydroxyproline-rich glycoproteinfamily protein	2.25328	3.59877	0.251972	-8.50628	5.85068	3.34494	8.50628		At3g10580	3307088	3308235	Complement	F13M14.13	myb family transcriptionfactor	-2.32337	-1.69189	-2.69377	10.1253	-3.66007	-4.04591	10.1253
At5g01520	206431	208610	sense	F7A7.40	zinc finger (C3HC4-type RINGfinger) family protein	-0.0366776	4.72684	1.71543	-8.48724	3.89923	6.42605	8.48724		At5g23940	8076332	8079796	Complement	MRO11.2	transferase family protein	-2.89854	-1.73535	-1.85513	10.0131	-4.31812	-3.27235	10.0131
At5g46180	18735702	18738498	Complement	MCL19.24	ornithine aminotransferaseputative / ornithine--oxo-acid aminotransferase putative	2.76034	2.38518	0.76433	-8.48188	5.01538	2.81372	8.48188		At1g24020	8500466	8501504	Complement	T23E23.28	Bet v I allergen familyprotein	-6.26311	-1.56119	0.209625	9.82405	-7.65674	-1.16814	9.82405
At1g79270	29820399	29824585	sense	YUP8H12R.13	expressed protein	3.12637	1.58469	1.55864	-8.47489	4.33796	2.82096	8.47489		At5g07280	2285041	2288687	sense	T2I1.1	leucine-rich repeat proteinkinase putative / extra sporogenous cells (ESP)	-2.77324	-1.62713	-1.66754	9.7875	-4.11963	-3.00306	9.7875
At5g49450	20069055	20069961	sense	K7J8.13	bZIP family transcription factor	2.24339	1.27654	2.42352	-8.441	3.17655	3.36372	8.441		At4g09960	6236482	6240803	Complement	T5L19.90	MADS-box protein (AGL11)	-2.02944	-2.18493	-2.12034	9.75981	-3.92105	-4.03178	9.75981
At5g24150	8172369	8175434	Complement	MLE8.1	squalene monooxygenase 11 /squalene epoxidase 11 (SQP11)	3.87141	1.43367	0.524279	-8.41194	5.10429	1.7282	8.41194		At5g48480	19661901	19663103	sense	MJE7.12	expressed protein	-3.67921	-1.46213	-1.46485	9.75171	-4.77147	-2.62184	9.75171
At5g22860	7639359	7642987	Complement	MRN17.9	serine carboxypeptidase S28family protein	5.04108	0.876154	0.646475	-8.37876	5.32006	1.33516	8.37876		At2g28950	12438418	12440672	Complement	F8N16.24	expansin putative (EXP6)	-3.95812	0.721894	-3.74655	9.70309	-2.59821	-2.45043	9.70309
At1g02470	511765	513611	Complement	T6A9.26	expressed protein	0.968352	3.36706	1.69654	-8.37069	3.92162	4.81915	8.37069		At1g01300	116943	118764	sense	F6F3.10	aspartyl protease family protein	-4.62289	-0.689428	-1.26851	9.67436	-4.70698	-1.72455	9.67436
At5g57350	23248105	23253798	Complement	MJB24.16	ATPase 3 plasma membrane-type /proton pump 3	3.06072	2.06864	0.532013	-8.2798	5.09286	2.30188	8.2798		At4g34980	16656696	16659344	Complement	F11I11.8	subtilase family protein	-3.50497	-1.72501	-1.47505	9.65494	-4.88909	-2.87511	9.65494
At1g75750	28445202	28446023	Complement	F10A5.6	gibberellin-regulated protein 1(GASA1) / gibberellin-responsive protein 1	0.311305	1.24074	4.64636	-8.27674	1.35503	5.59066	8.27674		At1g29070	10149777	10151344	sense	F28N24.22	ribosomal protein L34 familyprotein	-1.50241	-1.52492	-3.14627	9.61409	-2.72037	-4.38464	9.61409
At4g14020	8095210	8095731	Complement	FCAALL.138	rapid alkalinization factor(RALF) family protein	2.05046	2.80342	1.34406	-8.26603	4.53717	3.77615	8.26603		At5g02540	568524	570918	sense	T22P11.130	short-chaindehydrogenase/reductase (SDR) family protein	-2.29278	-1.86372	-2.06242	9.56974	-3.85485	-3.62963	9.56974
At3g03470	824559	826444	Complement	T21P5.11	cytochrome P450 putative	3.8985	2.39877	-0.0769198	-8.26169	6.39069	2.00047	8.26169		At5g60140	24231303	24232581	Complement	MGO3.2	transcriptional factor B3 familyprotein	-2.27055	-2.06743	-1.94909	9.56584	-4.0379	-3.71436	9.56584
At2g40670	16977336	16978198	sense	T7D17.15	two-component responsiveregulator / response regulator 16 (ARR16)	0.821263	3.10658	1.8404	-8.25854	3.53242	4.79058	8.25854		At4g31840	15401646	15402623	sense	F11C18.40	plastocyanin-likedomain-containing protein	-2.37892	-2.17855	-1.91174	9.53811	-4.24916	-3.76974	9.53811
At5g49360	20029105	20033968	Complement	K21P3.26	glycosyl hydrolase family 3protein	0.282856	4.42913	1.5971	-8.19743	4.05647	5.79756	8.19743		At3g24500	8918686	8919315	sense	MOB24.13	ethylene-responsivetranscriptional coactivator putative	-2.22009	-2.10574	-1.86517	9.47591	-4.03546	-3.67401	9.47591
At2g32240	13691376	13695401	Complement	F22D22.1	expressed protein	0.467527	3.24499	1.98776	-8.13365	3.26528	5.19246	8.13365		At4g29410	14468250	14470173	Complement	F17A13.230	60S ribosomal protein L28(RPL28C)	-0.523157	-2.1435	-3.54747	9.47076	-2.34872	-5.71673	9.47076
At4g32940	15900273	15903271	Complement	F26P21.60	vacuolar processing enzymegamma / gamma-VPE	2.0558	3.3179	0.670282	-8.1258	5.15745	3.55097	8.1258		At5g55180	22406012	22407938	sense	MCO15.13	glycosyl hydrolase family 17protein	-0.0158381	-3.67975	-2.84166	9.45432	-3.14426	-6.86581	9.45432
At2g23450	9995834	9998739	Complement	F26B6.10	protein kinase family protein	2.96449	1.78875	1.10684	-8.11822	4.47286	2.59655	8.11822		At5g59870	24132608	24133444	Complement	MMN10.22	histone H2A putative	-2.56558	-1.65956	-1.64414	9.37827	-3.9746	-3.02561	9.37827
At1g28130	9825296	9828054	sense	F13K9.22	auxin-responsive GH3 familyprotein	0.03418	2.22501	4.02387	-8.10605	1.9531	6.19715	8.10605		At3g52550	19503354	19503890	Complement	F22O6.70	hypothetical protein	-1.36392	-2.02884	-2.12969	9.36426	-3.13089	-4.01349	9.36426
At1g24575	8711023	8711515	Complement	F21J9.33	expressed protein	0.948806	2.76151	2.27424	-8.07147	3.32404	4.81134	8.07147		At1g09750	3157503	3159147	sense	F21M12.13	chloroplast nucleoidDNA-binding protein-related	-2.63972	-1.32906	-2.48738	9.28952	-3.5898	-3.45879	9.28952
At4g28085	13960042	13960478	sense	T13J8.3	expressed protein	3.4581	3.42718	-0.730355	-8.0661	7.5598	2.20756	8.0661		At5g07030	2183361	2185702	Complement	MOJ9.20	aspartyl protease family protein	-4.31258	-0.730521	-1.66575	9.2841	-4.46272	-2.11209	9.2841
At1g80180	30161718	30162476	Complement	F18B13.26	expressed protein	3.91713	1.97492	0.300788	-8.06066	5.69513	1.99353	8.06066		At4g34670	16548651	16550453	sense	T4L20.250	40S ribosomal protein S3A(RPS3aB)	-1.07052	-2.07098	-3.17048	9.20677	-2.80836	-5.0382	9.20677
At1g53560	19988423	19989649	Complement	T3F20.13	expressed protein	3.17538	1.70061	0.917998	-8.03795	4.61954	2.3359	8.03795		At5g16130	5268424	5270091	sense	T21H19.50	40S ribosomal protein S7(RPS7C)	-1.46133	-1.89667	-2.94961	9.20417	-3.02789	-4.57789	9.20417
At5g58350	23602401	23605027	sense	MCK7.22	protein kinase family protein	3.93892	1.66252	0.502799	-8.03025	5.32005	1.90714	8.03025		At3g02640	564891	565715	Complement	F16B3.27	expressed protein	-2.26239	-2.21556	-1.86988	9.20361	-4.16765	-3.76637	9.20361
At1g47128	17285265	17288110	Complement	F2G19.31	cysteine proteinase (RD21A) /thiol protease	2.37796	2.21403	0.955102	-8.00671	4.3917	2.85919	8.00671		At1g18650	6418852	6420521	Complement	F25I16.1	glycosyl hydrolase familyprotein 17	-2.26728	-1.72238	-2.02903	9.18348	-3.68636	-3.45685	9.18348
At2g41380	17259019	17260135	sense	F13H10.7	embryo-abundant protein-related	5.10904	1.07667	0.125632	-8.00332	5.77387	1.04784	8.00332		At1g73620	27685069	27686790	sense	F25P22.3	thaumatin-like protein putative/ pathogenesis-related protein putative	-2.37123	-1.96941	-2.02335	9.09928	-4.0046	-3.66401	9.09928
At3g15470	5216269	5220225	Complement	MJK13.13	WD-40 repeat family protein	1.38284	2.02786	2.4912	-8.00095	3.07496	4.23185	8.00095		At3g06220	1883678	1884726	Complement	F28L1.16	transcriptional factor B3 familyprotein	-2.09528	-2.00604	-1.70687	9.09712	-3.83799	-3.43737	9.09712
At3g07670	2451614	2454866	sense	F17A17.1	SET domain-containing protein	2.39835	1.26577	1.83328	-8.00019	3.35524	2.81288	8.00019		At5g44620	18015006	18016785	Complement	K15C23.6	cytochrome P450 family protein	-5.09667	-0.100169	-1.72203	9.08909	-4.34558	-1.57758	9.08909
At1g15670	5389947	5391485	sense	F7H2.1	kelch repeat-containing F-boxfamily protein	1.71369	2.76325	1.66948	-7.99703	4.10692	4.07319	7.99703		At3g25900	9482076	9484163	sense	MPE11.15	homocysteine S-methyltransferase1 (HMT-1)	-2.33102	-0.912453	-2.58993	9.01451	-2.90464	-3.15868	9.01451
At5g39520	15840681	15842720	Complement	MUL8.22	expressed protein	6.35075	1.14074	-0.454965	-7.9898	6.95828	0.593664	7.9898		At2g36570	15342575	15345006	sense	F1O11.20	leucine-rich repeattransmembrane protein kinase putative	-2.42556	-2.03118	-1.82189	9.00203	-4.13587	-3.52782	9.00203
At5g11110	3537085	3541005	sense	T5K6.100	sucrose-phosphate synthaseputative	3.07216	0.569046	1.92246	-7.97128	3.20589	2.19912	7.97128		At4g25740	13107332	13108807	Complement	F14M19.20	40S ribosomal protein S10(RPS10A)	-1.37841	-1.8502	-2.4038	8.90587	-2.94487	-4.06306	8.90587
At1g52880	19692625	19694210	Complement	F14G24.15	no apical meristem (NAM) familyprotein	2.1537	1.36739	2.34826	-7.92075	3.17507	3.37488	7.92075		At4g36180	17120088	17123844	Complement	F23E13.70	leucine-rich repeat familyprotein	-2.85997	-2.00907	-1.27777	8.80823	-4.60451	-2.96824	8.80823
At2g01890	396808	399207	Complement	T23K3.8	purple acid phosphataseputative	3.50258	2.51693	-0.119477	-7.9098	6.18833	2.05536	7.9098		At1g61720	22794846	22796465	Complement	T13M11.8	dihydroflavonol 4-reductase(dihydrokaempferol 4-reductase) family (BAN)	-2.00018	-2.00383	-1.93564	8.7997	-3.70686	-3.65365	8.7997
At1g49470	18314162	18315302	sense	F13F21.10	expressed protein	2.58402	1.23842	2.13408	-7.90666	3.44494	3.032	7.90666		At1g72370	27246607	27248589	Complement	T10D10.16	40S ribosomal protein SA(RPSaA)	-1.30019	-1.89869	-2.8647	8.76351	-2.87725	-4.51374	8.76351
At4g27410	13707246	13709128	Complement	F27G19.10	no apical meristem (NAM) familyprotein (RD26)	4.55994	1.21129	0.524719	-7.88289	5.31083	1.52339	7.88289		At1g28400	9972370	9973779	Complement	F3M18.16	expressed protein	-0.0939459	-2.9335	-3.3004	8.74483	-2.61257	-6.36847	8.74483
At1g23040	8164948	8165851	sense	T26J12.18	hydroxyproline-richglycoprotein family protein	1.40703	2.7232	1.71189	-7.86971	3.77595	4.12871	7.86971		At1g25330	8879863	8882085	Complement	F4F7.28	basic helix-loop-helix (bHLH)family protein	-1.97798	-2.13888	-1.60857	8.70957	-3.87323	-3.47797	8.70957
At5g38710	15518570	15521129	sense	MKD10.10	proline oxidase putative /osmotic stress-responsive proline dehydrogenase putative	6.23337	0.995299	-0.285322	-7.86508	6.55376	0.618381	7.86508		At2g12480	5076701	5079615	Complement	T27D6.5	serine carboxypeptidase S10family protein	-2.16201	-2.0894	-1.64532	8.70525	-3.98397	-3.442	8.70525
At1g54570	20384145	20388688	Complement	T22H22.2	esterase/lipase/thioesterasefamily protein	1.61393	3.0554	1.25698	-7.84996	4.33786	3.94489	7.84996		At3g14570	4892650	4902635	sense	MIE1.7	glycosyl transferase family 48protein	-1.41108	-1.63814	-2.86564	8.67399	-2.74426	-4.23454	8.67399
At4g32250	15570050	15573293	Complement	F10M6.110	protein kinase family protein	2.35885	2.92732	0.408954	-7.83952	5.20117	2.93729	7.83952		At5g07090	2202384	2204078	sense	MOJ9.26	40S ribosomal protein S4 (RPS4B)	-1.37164	-1.73835	-2.66798	8.66374	-2.81198	-4.17358	8.66374
At2g30140	12879211	12880897	sense	T27E13.12	UDP-glucoronosyl/UDP-glucosyltransferase family protein	4.12216	0.858454	1.11934	-7.80346	4.45332	1.74214	7.80346		At1g07320	2249132	2250526	sense	F22G5.34	50S ribosomal protein L4chloroplast (CL4)	-2.55288	-1.35591	-2.2856	8.65526	-3.53867	-3.29706	8.65526
At2g42890	17857001	17861607	sense	F7D19.11	RNA recognition motif(RRM)-containing protein	0.624714	3.18789	1.93021	-7.80001	3.38042	4.95418	7.80001		At3g07270	2314004	2317194	sense	T1B9.6	GTP cyclohydrolase I	-2.33974	-2.25394	-1.39135	8.65418	-4.33195	-3.32745	8.65418
At5g23660	7971654	7973928	Complement	MQM1.8	nodulin MtN3 family protein	1.58333	2.12734	1.87564	-7.75949	3.40383	3.72784	7.75949		At5g13000	4110298	4121430	Complement	T24H18.170	glycosyl transferase family 48protein	-0.578737	-2.13925	-3.28712	8.65026	-2.39808	-5.36276	8.65026
At1g05340	1558849	1559757	Complement	YUP8H12.4	expressed protein	4.45117	0.237723	1.28098	-7.70701	3.98055	1.32151	7.70701		At1g27400	9515122	9516912	sense	F17L21.19	60S ribosomal protein L17(RPL17A)	-1.33886	-1.5358	-3.1144	8.64935	-2.57606	-4.36813	8.64935
At1g02390	480852	483292	sense	T6A9.8	phospholipid/glycerolacyltransferase family protein	4.11471	2.95236	-0.887763	-7.68932	7.55406	1.7127	7.68932		At1g18080	6222194	6224144	sense	T10O22.6	WD-40 repeat family protein /auxin-dependent protein (ARCA) / guaninenucleotide-binding protein beta subunit putative	-0.987461	-1.70225	-3.31179	8.63194	-2.39233	-4.77182	8.63194
At5g53970	21927771	21930003	sense	K19P17.14	aminotransferase putative	3.21643	0.991354	1.31238	-7.66783	3.82615	2.05044	7.66783		At2g29570	12656983	12658780	Complement	F16P2.5	proliferating cell nuclearantigen 2 (PCNA2)	-1.67813	-1.70615	-2.06848	8.60812	-3.11546	-3.54179	8.60812
At3g19550	6787247	6788296	Complement	T31J18.5	expressed protein	0.772969	2.37871	2.7462	-7.66655	2.79257	4.88618	7.66655		At5g46700	18968188	18969995	sense	MZA15.11	senescence-associated proteinputative	-2.29353	-1.87906	-1.7916	8.5968	-3.86433	-3.36327	8.5968
At5g40450	16202027	16212756	Complement	MPO12.160	expressed protein	-0.251916	3.97705	2.28355	-7.61776	3.10165	6.32952	7.61776		At2g21790	9300435	9304922	sense	F7D8.11	ribonucleoside-diphosphatereductase small chain putative / ribonucleotidereductase putative	-1.61544	-1.98266	-2.43216	8.57282	-3.26597	-4.12707	8.57282
At3g01970	326481	327419	Complement	F1C9.25	WRKY family transcription factor	2.59081	1.89025	0.942877	-7.61598	4.26865	2.54445	7.61598		At5g60690	24414249	24419779	sense	MUP24.16	homeodomain-leucine zipperprotein Revoluta (REV) / fascicular fiberless 1 (IFL1)	-2.18196	-1.32774	-2.37516	8.56337	-3.17664	-3.37925	8.56337
At4g10120	6314910	6319932	sense	F28M11.40	sucrose-phosphate synthaseputative	5.53354	1.29095	-0.363817	-7.61574	6.48026	0.802332	7.61574		At1g76100	28558881	28559651	Complement	T23E18.3	plastocyanin	-2.55989	-0.156264	-3.55796	8.56131	-2.33675	-3.1864	8.56131
At3g17750	6073814	6078728	sense	MIG5.5	protein kinase family protein	3.73136	1.64438	0.610861	-7.56651	5.03289	1.98774	7.56651		At5g61130	24604456	24606806	Complement	MAF19.13	glycosyl hydrolase familyprotein 17	-1.42996	-2.55114	-1.90359	8.55408	-3.65952	-4.20806	8.55408
At4g35770	16944946	16946096	sense	F8D20.280	senescence-associated protein(SEN1)	0.103281	2.62054	3.09556	-7.55544	2.35503	5.68253	7.55544		At1g09200	2971595	2972201	Complement	T12M4.9	histone H3	-2.67684	-1.8289	-1.58666	8.55241	-4.18976	-3.09682	8.55241
At5g43780	17606418	17608762	Complement	MQD19.13	sulfate adenylyltransferase 4 /ATP-sulfurylase 4 (APS4)	0.630272	2.50128	2.61664	-7.53032	2.76612	4.92761	7.53032		At2g04780	1676975	1678452	sense	F28I8.18	fasciclin-likearabinogalactan-protein (FLA7)	-2.79302	-1.34656	-1.55468	8.52239	-3.8239	-2.61959	8.52239
At3g61180	22656541	22658642	sense	T20K12.80	zinc finger (C3HC4-type RINGfinger) family protein	1.68758	2.52183	1.38072	-7.49272	3.8977	3.57996	7.49272		At2g43800	18152798	18155974	sense	F18O19.9	formin homology 2domain-containing protein / FH2 domain-containing protein	-1.87372	-2.17856	-1.86777	8.49573	-3.73769	-3.74935	8.49573
At1g09500	3066701	3068600	sense	F14J9.16	cinnamyl-alcohol dehydrogenasefamily / CAD family	6.07507	1.14093	-0.446575	-7.47502	6.59687	0.602557	7.47502		At5g09530	2959735	2961272	Complement	F17I14.280	hydroxyproline-richglycoprotein family protein	-2.81135	-0.64787	-2.17612	8.49129	-3.06467	-2.50622	8.49129
At2g31945	13588658	13589203	sense	F20M17.2	expressed protein	0.248027	3.75875	2.00071	-7.47316	3.46319	5.53245	7.47316		At4g16720	9399987	9401404	Complement	FCAALL.416	60S ribosomal protein L15(RPL15A)	-0.771881	-2.13671	-2.96121	8.47527	-2.58606	-4.97666	8.47527
At1g74020	27838792	27840970	Complement	F2P9.11	strictosidine synthase familyprotein	2.73569	-0.442805	3.72642	-7.39614	1.91881	2.71279	7.39614		At3g44730	16296875	16301839	sense	T32N15.10	kinesin motor protein-related	-0.552508	-2.28337	-3.2769	8.47505	-2.4972	-5.46224	8.47505
At5g43450	17474359	17476025	Complement	MWF20.16	2-oxoglutarate-dependentdioxygenase putative	5.4355	1.05626	-0.126657	-7.37998	5.94235	0.80939	7.37998		At3g26120	9547635	9550423	sense	MJL14.2	RNA-binding protein putative	-2.04638	-2.16387	-1.774	8.4671	-3.90066	-3.62857	8.4671
At3g17780	6086954	6088342	sense	MIG5.8	expressed protein	3.25456	2.17469	0.191027	-7.35907	5.33598	2.06402	7.35907		At3g02560	541722	543341	sense	F16B3.19	40S ribosomal protein S7(RPS7B)	-1.16003	-1.93085	-3.07664	8.45771	-2.76033	-4.73203	8.45771
At4g02280	994927	998963	sense	T2H3.8	sucrose synthase putative /sucrose-UDP glucosyltransferase putative	3.05106	1.62844	0.834369	-7.32942	4.40082	2.19053	7.32942		At1g22780	8067853	8069319	sense	T22J18.5	40S ribosomal protein S18(RPS18A)	-1.71041	-1.5218	-2.74451	8.45112	-2.91039	-3.94497	8.45112
At3g10390	3229298	3231824	sense	F13M14.34	amine oxidase family protein /SWIRM domain-containing protein	3.9387	1.61513	0.0969601	-7.29426	5.39618	1.49158	7.29426		At1g48630	17985448	17986995	Complement	F11I4.18	guanine nucleotide-bindingfamily protein / activated protein kinase C receptorputative / RACK putative	-1.26401	-1.91615	-2.63392	8.436	-2.87065	-4.32719	8.436
At2g32150	13666096	13667841	sense	F22D22.10	haloacid dehalogenase-likehydrolase family protein	2.33612	1.41976	1.61125	-7.27257	3.4363	2.73988	7.27257		At1g02730	594590	598657	Complement	F22D16.26	cellulose synthase familyprotein	-1.89062	-2.00285	-2.10808	8.42775	-3.56233	-3.8032	8.42775
At3g14595	4908957	4910483	sense	MIE1.24	expressed protein	4.57786	1.02139	0.440515	-7.25449	5.07259	1.28009	7.25449		At1g58430	21715230	21716768	Complement	X7J.14	GDSL-motif lipase/hydrolase familyprotein	-3.0445	-1.99348	-0.861366	8.40079	-4.82475	-2.5512	8.40079
At5g63850	25568281	25570746	sense	MGI19.6	amino acid transporter 4putative (AAP4)	0.0808421	2.58745	3.13176	-7.24212	2.30701	5.59092	7.24212		At4g15000	8571829	8572485	sense	FCAALL.99	60S ribosomal protein L27(RPL27C)	-1.54114	-1.84619	-2.70687	8.37437	-3.05068	-4.24237	8.37437
At4g02940	1306503	1310938	sense	T4I9.18	oxidoreductase 2OG-Fe(II)oxygenase family protein	3.58675	1.91963	0.328876	-7.22672	5.22346	1.96984	7.22672		At1g69700	26223901	26225487	sense	T6C23.10	ABA-responsive protein (HVA22c)	-1.78294	-1.61751	-2.32521	8.36872	-3.0976	-3.66105	8.36872
At4g18990	10401921	10404259	Complement	F13C5.160	xyloglucan:xyloglucosyltransferase putative / xyloglucan endotransglycosylaseputative / endo-xyloglucan transferase putative	0.660167	2.73285	1.91626	-7.21684	3.0191	4.47456	7.21684		At1g07370	2263140	2264549	sense	F22G5.29	proliferating cell nuclearantigen 1 (PCNA1)	-2.19217	-2.05997	-1.57733	8.36452	-3.96414	-3.33287	8.36452
At3g56170	20853556	20855437	sense	F18O21.130	Ca(2+)-dependent nuclease	2.76386	0.800591	2.12448	-7.21258	3.15644	2.59068	7.21258		At3g04840	1329699	1331581	sense	T9J14.21	40S ribosomal protein S3A(RPS3aA)	-1.00826	-2.0333	-2.73101	8.33067	-2.72582	-4.58009	8.33067
At4g01480	626118	628036	sense	F11O4.12	inorganic pyrophosphataseputative [soluble] / pyrophosphate phospho-hydrolaseputative / PPase putative	0.549149	0.720125	4.49503	-7.17314	1.10842	4.66751	7.17314		At5g20740	7025688	7026534	Complement	T1M15.140	invertase/pectin methylesteraseinhibitor family protein	-2.99332	-1.81434	-1.36232	8.32823	-4.47175	-2.85365	8.32823
At1g76590	28745585	28747101	sense	F14G6.19	zinc-binding family protein	3.10315	2.20072	0.15028	-7.14595	5.22852	2.04878	7.14595		At3g19790	6874943	6875446	Complement	MMB12.25	hypothetical protein	-6.25272	-0.58377	-0.335598	8.31123	-5.91239	-0.802157	8.31123
At4g25000	12851979	12853855	Complement	F13M23.140	alpha-amylase putative /14-alpha-D-glucan glucanohydrolase putative	5.80668	1.22471	-0.654236	-7.14172	6.67474	0.493434	7.14172		At3g17120	5841102	5843491	sense	K14A17.19	expressed protein	-1.56804	-1.76784	-1.74732	8.28082	-3.11143	-3.31995	8.28082
At5g64240	25712846	25715046	sense	MSJ1.8	latex-abundant family protein(AMC3) / caspase family protein	2.20099	2.50806	0.571776	-7.13649	4.56948	2.73342	7.13649		At1g65900	24519509	24522111	Complement	F12P19.7	expressed protein	-1.81783	-1.97484	-1.90432	8.27293	-3.49523	-3.60172	8.27293
At2g28085	11975197	11975697	Complement	F24D13.1	auxin-responsive family protein	1.52	5.50015	-0.703424	-7.13513	6.75552	3.76064	7.13513		At3g17810	6094157	6096572	sense	MEB5.3	dihydroorotate dehydrogenasefamily protein / dihydroorotate oxidase family protein	-1.79425	-2.15673	-1.93107	8.27015	-3.63182	-3.79202	8.27015
At2g02390	628937	631113	sense	T16F16.18	glutathione S-transferase zeta1 (GSTZ1) (GST18)	4.80807	0.990312	0.067004	-7.11218	5.33807	0.922408	7.11218		At3g48700	18049633	18050861	Complement	T8P19.210	expressed protein	-1.80241	-1.51557	-2.47986	8.26463	-2.99672	-3.68203	8.26463
At4g16000	9063857	9064493	Complement	FCAALL.25	expressed protein	4.84342	1.18563	0.0513299	-7.10927	5.53361	1.07893	7.10927		At2g22170	9433929	9434891	Complement	T26C19.17	lipid-associated familyprotein	-2.68396	-1.42943	-1.5905	8.25607	-3.79065	-2.72903	8.25607
At2g37460	15733527	15736176	Complement	F3G5.25	nodulin MtN21 family protein	0.62669	2.9837	1.85156	-7.09916	3.19923	4.61616	7.09916		At5g62210	25003553	25004715	Complement	MTG10.26	embryo-specific protein-related	-1.46318	-1.98883	-2.22858	8.2524	-3.14783	-3.97539	8.2524
At4g03320	1464467	1466164	sense	F4C21.25	chloroplast protein importcomponent-related	1.57472	2.08058	1.55119	-7.09848	3.35734	3.34945	7.09848		At2g39460	16482001	16483163	sense	F12L6.12	60S ribosomal protein L23A(RPL23aA)	-1.02871	-1.94211	-2.66841	8.23168	-2.66729	-4.43239	8.23168
At1g04970	1411169	1413625	sense	F13M7.4	lipid-binding serum glycoproteinfamily protein	1.89479	2.27031	1.15473	-7.06803	3.8758	3.10816	7.06803		At5g19880	6720386	6722477	Complement	F28I16.30	peroxidase putative	-0.661501	-2.93374	-2.40771	8.21797	-3.18572	-5.20488	8.21797
At3g48950	18159002	18160972	sense	T2J13.210	glycoside hydrolase family 28protein / polygalacturonase (pectinase) family protein	1.92566	1.7218	1.70141	-7.05674	3.33258	3.12033	7.05674		At5g22880	7651960	7652625	Complement	MRN17.11	histone H2B putative	-2.2414	-1.9897	-1.88526	8.20545	-3.88271	-3.53625	8.20545
At1g52890	19700672	19702140	Complement	F14G24.16	no apical meristem (NAM) familyprotein	1.75849	1.86236	1.58514	-7.05333	3.32238	3.16038	7.05333		At1g03170	769632	770684	sense	F15K9.22	expressed protein	-3.92483	-1.30491	-0.970801	8.19715	-4.81776	-2.01512	8.19715
At5g57660	23372690	23374215	sense	MUA2.27	zinc finger (B-box type) familyprotein	0.0224187	3.26244	2.11571	-7.04479	2.80574	5.37023	7.04479		At2g36160	15176897	15178428	sense	F9C22.9	40S ribosomal protein S14(RPS14A)	-1.16696	-1.76341	-2.84788	8.19114	-2.62607	-4.36644	8.19114
At3g60650	22430926	22431249	sense	T4C21.60	expressed protein	2.74621	1.89091	0.796226	-7.03194	4.36116	2.3912	7.03194		At3g54360	20139283	20142832	Complement	T12E18.50	expressed protein	-2.99772	-0.571464	-2.56763	8.1702	-3.12683	-2.76112	8.1702
At2g17500	7613839	7616317	sense	MJB20.6	auxin efflux carrier familyprotein	2.03156	1.50414	1.92364	-7.03049	3.20037	3.10615	7.03049		At3g23330	8347207	8349354	sense	MLM24.6	pentatricopeptide (PPR)repeat-containing protein	-1.40525	-1.5762	-2.32084	8.16968	-2.70963	-3.67495	8.16968
At5g42250	16911237	16914844	sense	K5J14.6	alcohol dehydrogenase putative	4.01028	-0.304256	2.0069	-7.02832	3.03754	1.44834	7.02832		At4g30800	15001173	15002677	sense	T10C21.1	40S ribosomal protein S11(RPS11B)	-1.26493	-1.83121	-2.78384	8.1642	-2.77616	-4.3386	8.1642
At1g79520	29917145	29919507	Complement	T8K14.6	cation efflux family protein	2.17068	0.229781	2.9609	-6.971	2.07721	2.75704	6.971		At1g74560	28021267	28023656	Complement	F1M20.24	nucleosome assembly protein(NAP) family protein	-1.00457	-1.69394	-2.4156	8.14309	-2.43296	-3.96534	8.14309
At2g24550	10434936	10436301	Complement	F25P17.15	expressed protein	2.11777	2.76753	0.364079	-6.94882	4.75164	2.75255	6.94882		At5g60670	24398136	24398819	Complement	MUP24.13	60S ribosomal protein L12(RPL12C)	-1.61682	-1.85144	-2.50641	8.11406	-3.13296	-4.04518	8.11406
At3g61860	22911047	22913309	Complement	F21F14.30	arginine/serine-rich splicingfactor RSP31 (RSP31)	3.84566	2.33555	-0.465984	-6.93401	6.178	1.59235	6.93401		At3g20630	7203007	7208346	Complement	K10D20.26	ubiquitin-specific protease 14putative (UBP14)	-2.65279	-0.982471	-2.31867	8.10916	-3.24941	-2.95367	8.10916
At1g72800	27400878	27402162	sense	F28P22.1	nuM1-related	1.94688	1.53422	1.85015	-6.92721	3.15454	3.0735	6.92721		At5g51550	20956720	20958121	Complement	K17N15.10	phosphate-responsive 1 familyprotein	-2.70663	0.059703	-3.56818	8.07046	-2.25391	-2.97284	8.07046
At1g26920	9329499	9330385	sense	T2P11.11	expressed protein	-0.179827	2.58668	3.17633	-6.89624	2.058	5.71539	6.89624		At2g44640	18424319	18426472	sense	F16B22.13	expressed protein	-1.4643	-1.94697	-2.28997	8.04513	-3.09109	-3.96397	8.04513
At5g59400	23974963	23976933	sense	F2O15.8	expressed protein	1.12452	2.50309	1.67168	-6.88014	3.27895	3.88485	6.88014		At3g25490	9242962	9244722	sense	MWL2.11	wall-associated kinase putative	-0.983503	-1.58274	-2.87033	8.0268	-2.29476	-4.26171	8.0268
At5g18130	5995482	5997400	sense	MRG7.9	expressed protein	2.61001	0.402253	2.55268	-6.85009	2.61929	2.58023	6.85009		At1g18540	6377314	6378571	Complement	F25I16.12	60S ribosomal protein L6(RPL6A)	-1.09884	-1.96819	-2.56105	8.02384	-2.75657	-4.31708	8.02384
At4g19840	10774286	10775911	sense	T16H5.200	lectin-related	1.871	3.05839	0.643282	-6.8391	4.60352	3.28062	6.8391		At2g37190	15626486	15627198	Complement	T2N18.5	60S ribosomal protein L12(RPL12A)	-1.55844	-2.03608	-2.48943	8.02376	-3.2406	-4.19749	8.02376
At5g14940	4831751	4834315	Complement	F2G14.60	proton-dependent oligopeptidetransport (POT) family protein	3.95224	1.40902	0.169973	-6.83035	5.04895	1.38111	6.83035		At5g16250	5310100	5310954	Complement	T21H19.170	expressed protein	-1.95099	-1.93143	-2.08193	8.02336	-3.54175	-3.68748	8.02336
At1g75880	28494111	28496116	sense	T4O12.12	family II extracellular lipase 1(EXL1)	-0.375395	3.44093	2.50197	-6.80375	2.55811	5.96424	6.80375		At1g78630	29580849	29582551	sense	T30F21.4	ribosomal protein L13 familyprotein	-2.05173	-1.07606	-2.60875	8.01931	-2.79979	-3.33655	8.01931
At1g68620	25769610	25770903	sense	F24J5.14	expressed protein	4.69644	0.502408	0.6657	-6.76252	4.51352	1.01977	6.76252		At4g34290	16410836	16412389	sense	F10M10.60	SWIB complex BAF60bdomain-containing protein	-1.09787	-2.16926	-2.51487	7.98084	-2.93519	-4.45687	7.98084
At4g18980	10398929	10399523	sense	F13C5.150	expressed protein	0.155465	3.85371	1.54982	-6.75695	3.43616	5.12891	6.75695		At5g51810	21072414	21074034	Complement	MIO24.5	gibberellin 20-oxidase putative	-2.21365	-2.05504	-1.42094	7.97051	-3.99148	-3.17021	7.97051
At5g20830	7050228	7054121	Complement	T1M15.230	sucrose synthase / sucrose-UDPglucosyltransferase (SUS1)	0.91662	2.02279	2.14574	-6.75582	2.62975	3.93445	6.75582		At5g58782	23755373	23756690	Complement	MZN1.32	dehydrodolichyl diphosphatesynthase putative / DEDOL-PP synthase putative	-1.78104	-2.05639	-1.89789	7.96375	-3.52012	-3.65777	7.96375
At5g39050	15651815	15653293	sense	MXF12.60	transferase family protein	2.9765	1.34386	1.05206	-6.72452	3.94661	2.12817	6.72452		At5g14520	4680792	4684333	Complement	T15N1.10	pescadillo-related	-0.856676	-1.88381	-2.73549	7.93228	-2.44641	-4.46454	7.93228
At3g23880	8621999	8623169	Complement	F14O13.6	F-box family protein	2.97774	0.780071	1.66454	-6.72111	3.32846	2.15952	6.72111		At1g01100	50091	51182	Complement	T25K16.9	60S acidic ribosomal protein P1(RPP1A)	-1.84899	-1.2568	-2.44592	7.90354	-2.79416	-3.38542	7.90354
At4g01430	585609	588028	sense	F3D13.4	nodulin MtN21 family protein	2.60261	-1.445	4.64989	-6.71517	0.908008	2.33843	6.71517		At1g16920	5787323	5789242	Complement	F6I1.7	Ras-related GTP-binding proteinputative	-2.53806	-1.61771	-1.58324	7.89594	-3.83097	-2.89587	7.89594
At3g06420	1954996	1956399	Complement	F24P17.11	autophagy 8h (APG8h)	1.16663	0.913925	2.96055	-6.70612	1.84189	3.52892	6.70612		At1g69620	26193501	26194986	sense	T6C23.18	60S ribosomal protein L34(RPL34B)	-1.22658	-1.39986	-2.74272	7.84529	-2.35388	-3.88555	7.84529
At3g51700	19190245	19192168	Complement	T18N14.80	expressed protein	1.71161	2.26478	1.05748	-6.70469	3.7039	3.01748	6.70469		At1g17560	6037457	6038685	Complement	F1L3.27	ribosomal protein L14 familyprotein	-2.19652	-1.03301	-2.03903	7.82661	-2.9224	-2.78388	7.82661
At1g78290	29461388	29464281	Complement	F3F9.17	serine/threonine protein kinaseputative	1.15013	2.82209	1.25534	-6.694	3.61698	3.7504	6.694		At1g48350	17870876	17872010	sense	F11A17.10	ribosomal protein L18 familyprotein	-1.65967	-1.28931	-2.74371	7.82568	-2.63927	-3.69541	7.82568
At5g58650	23716934	23717452	Complement	MZN1.10	expressed protein	2.60975	2.73652	-0.0255078	-6.68621	5.26782	2.33338	6.68621		At5g10390	3268848	3269551	Complement	F12B17.260	histone H3	-1.90482	-1.84713	-2.10148	7.81533	-3.41039	-3.62242	7.81533
At1g04350	1165164	1166767	sense	F19P19.22	2-oxoglutarate-dependentdioxygenase putative	2.78567	1.10424	1.27896	-6.66926	3.53305	2.12224	6.66926		At2g36620	15357486	15358944	Complement	F1O11.15	60S ribosomal protein L24(RPL24A)	-1.4152	-1.63568	-2.48759	7.79858	-2.75306	-3.85429	7.79858
At5g58570	23689929	23690513	Complement	MQJ2.19	expressed protein	2.28305	3.68092	-0.496081	-6.65608	5.99774	2.63388	6.65608		At4g00100	37096	38312	sense	F6N15.7	40S ribosomal protein S13(RPS13A)	-1.22386	-1.36467	-2.84574	7.79343	-2.315	-3.93698	7.79343
At2g28200	12031170	12032377	sense	T3B23.13	zinc finger (C2H2 type) familyprotein	0.628728	2.13319	2.45585	-6.65292	2.44045	4.35929	6.65292		At5g04530	1291823	1293689	Complement	T32M21.130	beta-ketoacyl-CoA synthasefamily protein	-1.98013	-2.03944	-1.67146	7.77644	-3.70261	-3.40013	7.77644
At4g17900	9945974	9948091	sense	T6K21.80	zinc-binding family protein	0.224817	1.74775	2.95208	-6.63864	1.7209	4.64466	6.63864		At1g16350	5590945	5592866	sense	F3O9.15	inosine-5'-monophosphatedehydrogenase putative	-0.729532	-2.11959	-2.52583	7.75525	-2.53853	-4.53377	7.75525
At1g55960	20931308	20933682	Complement	F14J16.24	expressed protein	1.08189	2.14501	1.64734	-6.62442	2.92943	3.55888	6.62442		At5g22440	7435128	7436642	Complement	MWD9.24	60S ribosomal protein L10A(RPL10aC)	-1.25192	-1.58977	-2.62305	7.7527	-2.55583	-3.96499	7.7527
At5g11060	3510119	3513306	sense	T5K6.50	homeobox protein knotted-1 like 4(KNAT4)	1.10765	2.2498	1.78144	-6.6204	3.02588	3.75073	6.6204		At3g03670	901862	903384	Complement	T12J13.5	peroxidase putative	-1.88459	-1.85143	-2.02399	7.73057	-3.40087	-3.55666	7.73057
At1g77760	29240697	29244339	Complement	T32E8.9	nitrate reductase 1 (NR1)	5.39658	0.54965	0.0712121	-6.61344	5.16125	0.541673	6.61344		At4g27440	13725597	13727359	sense	F27G19.40	protochlorophyllide reductaseB chloroplast / PCR B / NADPH-protochlorophyllideoxidoreductase B (PORB)	-3.72173	-0.460564	-1.78374	7.72861	-3.63852	-1.96545	7.72861
At5g54130	21981074	21982505	sense	MJP23.11	calcium-binding EF hand familyprotein	0.311292	1.65906	3.75841	-6.60631	1.71984	4.98627	6.60631		At5g27850	9873160	9874602	sense	F14I23.10	60S ribosomal protein L18(RPL18C)	-0.977698	-1.91222	-2.78375	7.72805	-2.57836	-4.46263	7.72805
At5g43260	17374615	17375310	Complement	MNL12.8	chaperone protein dnaJ-related	3.5524	1.0281	0.875224	-6.60589	4.12659	1.67708	6.60589		At3g53160	19713434	19714954	Complement	T4D2.90	UDP-glucoronosyl/UDP-glucosyltransferase family protein	-1.88013	-1.89591	-1.80684	7.72471	-3.47438	-3.41018	7.72471
At1g62200	22985701	22988024	Complement	F19K23.13	proton-dependent oligopeptidetransport (POT) family protein	0.878456	3.23097	1.1533	-6.5538	3.69614	4.02602	6.5538		At3g16220	5497620	5499241	sense	MYA6.3	expressed protein	-1.25858	-1.44896	-2.61192	7.7151	-2.43164	-3.80725	7.7151
At1g06460	1966834	1969535	Complement	F12K11.19	31.2 kDa small heat shockfamily protein / hsp20 family protein	2.19126	3.74314	-0.569452	-6.52166	5.99807	2.60822	6.52166		At2g42830	17827442	17831090	sense	F7D19.17	agamous-like MADS box proteinAGL5 / floral homeodomain transcription factor (AGL5)	-1.81579	-1.84055	-1.40438	7.70552	-3.4381	-3.00167	7.70552
At4g15610	8909098	8910906	sense	FCAALL.139	integral membrane familyprotein	3.55115	1.57637	0.192816	-6.50579	4.84795	1.54581	6.50579		At5g13980	4508498	4514668	sense	MAC12.38	glycosyl hydrolase family 38protein	-2.682	-1.5055	-1.25533	7.70117	-3.89889	-2.48591	7.70117
At2g36950	15522212	15524010	sense	T1J8.13	heavy-metal-associateddomain-containing protein	3.02334	1.53271	0.78822	-6.50042	4.18827	2.05249	6.50042		At4g15830	8995126	8996614	Complement	FCAALL.419	expressed protein	-1.91958	-2.04589	-1.48144	7.69574	-3.68884	-3.23905	7.69574
At2g45210	18648640	18649778	sense	F4L23.28	auxin-responsiveprotein-related	5.0815	0.348096	0.382699	-6.49149	4.63361	0.637136	6.49149		At4g21590	11480379	11482726	sense	F18E5.210	bifunctional nucleaseputative	-2.10576	-2.00158	-0.987326	7.68841	-3.97368	-2.7194	7.68841
[truncated: 1,089 more rows]

## Sheet: SEP+PET
Genes down-regulated in SEPals and PETals/up-regulated in STAmens and CARpels (all: 449, highest absolute D stat: 51)														Genes up-regulated in SEPals and PETals/down-regulated in STAmens and CARpels (all: 510, highest absolute D stat: 124)
[truncated: 511 more rows]

## Sheet: PET+STA
Genes down-regulated in PETals and STAmens (all: 494, highest absolute D stat: 153)														Genes up-regulated in PETals and STAmens (all: 720, highest absolute D stat: 298)
[truncated: 721 more rows]
